# Supplementary material
Source: PubMed Central journal article supplement (PMC3114462)
Supplement: ct200030k_si_001.pdf [file ct200030k_si_001.pdf]

# Supporting information for Excited State Electronic Structure with CIS and TDDFT on Graphical Processing Units

Christine M. Isborn, Nathan Luehr, Ivan S. Ufimtsev, and Todd J. Martinez

*Department of Chemistry and PULSE Institute, Stanford University, Stanford, CA 94305*

In Tables S1-S22, this file contains CIS, TD-BLYP and TD-B3LYP timings (time for entire CIS/TD procedure, without SCF), number of CIS/TD iterations (note that ten initial guess vectors are used to seed the iterative Davidson diagonalization; hence the number of **AX** matrix vector products is  $9+N_{it}$ , where  $N_{it}$  is the reported number of iterations), first excitation energies and oscillator strengths, along with the Cartesian coordinates (in Angstroms) for the 22 structures used in the text. The timings are for convergence of the first excited state (residual vector norm  $< 0.00001$  atomic units), with ten initial guess vectors based on MO energy gaps. For PYP and the solvated chromophore, the structures were minimized and then equilibrated at 300K using ff99 and the general AMBER force field (GAFF), with the TIP3P water model. Coordinates were obtained from a single snapshot, with varying amounts of waters included in the CIS and TDDFT computations. B3PPQ and the oligothiophene dendrimers were optimized at the HF/6-31G level. Coordinates of the oligothiophene dendrimers were obtained from Ekaterina Badaeva. In cases where there were problems with convergence of the ground state SCF (because of deficiencies in the exchange-correlation functional), values are not given. We also provide information (Table S23) for the GPU code as a function of different screening and/or precision thresholds in order to quantify the influence of these on both accuracy of the resulting energies and timing.

**Table S1. Oligothiophene dendrimer S1**

| Method   | Time (s) | iterations | E (eV) | f   |
|----------|----------|------------|--------|-----|
| CIS      | 12.1     | 11         | 3.95   | 1.2 |
| TD-BLYP  | 7.8      | 7          | 2.57   | 0.0 |
| TD-B3LYP | 23.6     | 15         | 3.13   | 1.0 |

|   |           |           |           |
|---|-----------|-----------|-----------|
| C | -0.722083 | 0.019622  | -0.001042 |
| C | -1.588136 | -0.998850 | -0.000510 |
| C | -3.008656 | -0.664592 | -0.000534 |
| C | -3.216220 | 0.692807  | -0.001029 |
| S | -1.605047 | 1.568687  | -0.001670 |
| C | 0.722084  | -0.019621 | -0.001043 |
| C | 1.588136  | 0.998849  | -0.000510 |
| C | 3.008656  | 0.664592  | -0.000534 |
| C | 3.216220  | -0.692808 | -0.001029 |
| S | 1.605047  | -1.568688 | -0.001670 |
| C | 3.914163  | 1.835419  | 0.000227  |
| C | 3.501579  | 3.130663  | -0.000136 |
| C | 4.541086  | 4.116622  | 0.000971  |

|   |           |           |           |
|---|-----------|-----------|-----------|
| C | 5.773445  | 3.589467  | 0.002704  |
| S | 5.724231  | 1.816785  | 0.002291  |
| C | 6.508501  | -2.979690 | -0.000029 |
| C | 5.409183  | -3.747435 | -0.000801 |
| C | 4.192430  | -2.994345 | -0.001444 |
| C | 4.333129  | -1.641544 | -0.000854 |
| S | 6.104326  | -1.252413 | 0.000293  |
| C | -6.508501 | 2.979691  | -0.000029 |
| C | -5.409183 | 3.747436  | -0.000802 |
| C | -4.192430 | 2.994346  | -0.001444 |
| C | -4.333129 | 1.641544  | -0.000854 |
| S | -6.104326 | 1.252414  | 0.000294  |
| C | -3.914164 | -1.835419 | 0.000227  |
| C | -3.501580 | -3.130663 | -0.000137 |
| C | -4.541086 | -4.116622 | 0.000970  |
| C | -5.773445 | -3.589468 | 0.002705  |
| S | -5.724231 | -1.816785 | 0.002291  |
| H | -1.240434 | -2.005080 | -0.000031 |
| H | 1.240433  | 2.005080  | -0.000031 |
| H | 2.478302  | 3.430012  | -0.001115 |
| H | 4.343376  | 5.168666  | 0.001056  |
| H | 3.243355  | -3.484494 | -0.002781 |
| H | 5.429812  | -4.817567 | -0.001250 |
| H | -3.243355 | 3.484495  | -0.002783 |
| H | -5.429812 | 4.817567  | -0.001251 |
| H | -2.478302 | -3.430012 | -0.001116 |
| H | -4.343376 | -5.168667 | 0.001055  |
| H | 6.715540  | 4.089280  | 0.003941  |
| H | 7.532637  | -3.277499 | 0.000413  |
| H | -7.532638 | 3.277498  | 0.000413  |
| H | -6.715540 | -4.089280 | 0.003942  |

**Table S2. Oligothiophene dendrimer S2**

| Method   | Time(s) | iterations | E(eV) | f   |
|----------|---------|------------|-------|-----|
| CIS      | 97.1    | 18         | 4.11  | 1.2 |
| TD-BLYP* | 42.6    | 10         | 2.28  | 0.3 |
| TD-B3LYP | 92.5    | 11         | 2.98  | 1.3 |

\*timing is for convergence of the first two excited states, since this was necessary to get the correct states

|   |           |           |           |
|---|-----------|-----------|-----------|
| C | 0.709868  | 0.136544  | -1.117942 |
| C | 1.737212  | -0.729937 | -1.197166 |
| C | 3.051075  | -0.129619 | -1.204234 |
| C | 3.022223  | 1.222791  | -1.10913  |
| S | 1.323037  | 1.826467  | -1.019164 |
| C | -0.709899 | -0.136569 | -1.117915 |
| C | -1.737245 | 0.729911  | -1.197124 |
| C | -3.051108 | 0.129593  | -1.204148 |
| C | -3.022253 | -1.222816 | -1.109015 |
| S | -1.323064 | -1.826488 | -1.019087 |
| C | -6.054736 | 2.750762  | -1.18944  |
| C | -6.34693  | 1.74633   | -2.040948 |
| C | -5.331761 | 0.736676  | -2.139054 |
| C | -4.261257 | 0.941938  | -1.348599 |
| S | -4.448904 | 2.476593  | -0.416217 |
| C | -4.095919 | -2.20186  | -1.039354 |
| C | -4.244047 | -3.318487 | -1.781852 |
| C | -5.366358 | -4.133447 | -1.416772 |
| C | -6.095411 | -3.646321 | -0.391004 |
| S | -5.393171 | -2.099263 | 0.212069  |
| C | 4.095892  | 2.201836  | -1.039515 |
| C | 4.244005  | 3.318445  | -1.782043 |
| C | 5.366326  | 4.133412  | -1.417008 |
| C | 6.095396  | 3.646313  | -0.39124  |
| S | 5.393165  | 2.099272  | 0.211888  |
| C | 6.054707  | -2.750785 | -1.189559 |
| C | 6.346881  | -1.746362 | -2.041085 |
| C | 5.331706  | -0.736712 | -2.139185 |
| C | 4.261219  | -0.941968 | -1.348706 |
| S | 4.448898  | -2.4766   | -0.416291 |
| C | 8.066195  | -5.908174 | 0.16034   |
| C | 8.308426  | -5.758303 | -1.164677 |
| C | 7.613049  | -4.636517 | -1.750072 |
| C | 6.852802  | -3.924607 | -0.896427 |
| S | 6.953644  | -4.621553 | 0.759382  |
| C | 10.114801 | -8.538535 | -3.360264 |
| C | 10.84743  | -7.41518  | -3.405842 |
| C | 10.292713 | -6.334389 | -2.629986 |
| C | 9.148114  | -6.639193 | -1.990734 |

|   |            |           |           |
|---|------------|-----------|-----------|
| S | 8.661696   | -8.341891 | -2.341113 |
| C | 9.950811   | -8.42194  | 2.570902  |
| C | 8.649182   | -8.403692 | 2.899047  |
| C | 7.861058   | -7.529231 | 2.072777  |
| C | 8.560307   | -6.888654 | 1.112344  |
| S | 10.307264  | -7.343862 | 1.194534  |
| C | 9.195977   | 5.016414  | 1.692866  |
| C | 9.371473   | 5.317439  | 0.38291   |
| C | 8.295101   | 4.853106  | -0.459486 |
| C | 7.300156   | 4.211758  | 0.182872  |
| S | 7.640853   | 4.140416  | 1.947972  |
| C | 12.817763  | 6.643536  | -1.092612 |
| C | 11.876181  | 7.576379  | -1.302299 |
| C | 10.578382  | 7.208515  | -0.794113 |
| C | 10.537337  | 6.004901  | -0.193139 |
| S | 12.161449  | 5.218348  | -0.240005 |
| C | 11.440395  | 6.341101  | 4.674066  |
| C | 11.118823  | 5.059678  | 4.912406  |
| C | 10.31151   | 4.468788  | 3.87925   |
| C | 10.02539   | 5.296946  | 2.852498  |
| S | 10.760752  | 6.924071  | 3.130751  |
| C | -8.06619   | 5.908172  | 0.16046   |
| C | -8.308448  | 5.758286  | -1.164551 |
| C | -7.613089  | 4.636488  | -1.749945 |
| C | -6.852824  | 3.924589  | -0.896306 |
| S | -6.953627  | 4.621559  | 0.759495  |
| C | -10.114904 | 8.53848   | -3.36012  |
| C | -10.847519 | 7.415114  | -3.405676 |
| C | -10.292778 | 6.334339  | -2.629815 |
| C | -9.148164  | 6.63916   | -1.990598 |
| S | -8.661774  | 8.34186   | -2.341002 |
| C | -9.950724  | 8.422014  | 2.571008  |
| C | -8.64909   | 8.403741  | 2.899139  |
| C | -7.860993  | 7.529258  | 2.072866  |
| C | -8.560269  | 6.888676  | 1.112457  |
| S | -10.307216 | 7.343922  | 1.194663  |
| C | -9.195949  | -5.016378 | 1.693194  |
| C | -9.371464  | -5.317445 | 0.383251  |
| C | -8.295113  | -4.853123 | -0.459178 |
| C | -7.30016   | -4.211753 | 0.183145  |
| S | -7.640821  | -4.140374 | 1.948249  |
| C | -12.817783 | -6.643557 | -1.092194 |
| C | -11.876212 | -7.576418 | -1.301855 |
| C | -10.578402 | -7.208546 | -0.793703 |
| C | -10.537341 | -6.004916 | -0.192762 |
| S | -12.161444 | -5.218348 | -0.23964  |
| C | -11.440268 | -6.341029 | 4.674485  |

|   |            |           |           |
|---|------------|-----------|-----------|
| C | -11.118724 | -5.059591 | 4.912778  |
| C | -10.311442 | -4.468715 | 3.879589  |
| C | -10.025332 | -5.296895 | 2.852852  |
| S | -10.760647 | -6.924029 | 3.131172  |
| H | 1.600712   | -1.788532 | -1.280643 |
| H | -1.60075   | 1.788504  | -1.28063  |
| H | -5.41852   | -0.114065 | -2.782482 |
| H | -7.269427  | 1.69953   | -2.582275 |
| H | -3.570205  | -3.575581 | -2.573766 |
| H | -5.596183  | -5.060302 | -1.900754 |
| H | 3.570148   | 3.575521  | -2.57395  |
| H | 5.596138   | 5.060257  | -1.901014 |
| H | 5.418461   | 0.114033  | -2.782607 |
| H | 7.269365   | -1.699568 | -2.582434 |
| H | 7.668861   | -4.421055 | -2.797046 |
| H | 10.756602  | -5.37177  | -2.552841 |
| H | 11.759391  | -7.328887 | -3.960097 |
| H | 6.805384   | -7.400231 | 2.198528  |
| H | 8.233459   | -8.986385 | 3.694967  |
| H | 8.316999   | 4.975677  | -1.522637 |
| H | 9.718662   | 7.843052  | -0.871798 |
| H | 12.068878  | 8.507476  | -1.794465 |
| H | 9.970924   | 3.453972  | 3.912123  |
| H | 11.435147  | 4.524479  | 5.783772  |
| H | -7.668921  | 4.421015  | -2.796915 |
| H | -10.756654 | 5.371716  | -2.55265  |
| H | -11.759498 | 7.32881   | -3.959901 |
| H | -6.80532   | 7.400242  | 2.198602  |
| H | -8.233343  | 8.986445  | 3.695039  |
| H | -8.317021  | -4.975741 | -1.522324 |
| H | -9.718689  | -7.843093 | -0.871377 |
| H | -12.068922 | -8.507525 | -1.793996 |
| H | -9.970876  | -3.453891 | 3.912426  |
| H | -11.435034 | -4.524376 | 5.784139  |
| H | 10.305491  | -9.47351  | -3.836883 |
| H | 10.738365  | -8.986536 | 3.01664   |
| H | 13.849261  | 6.671174  | -1.36272  |
| H | 12.030222  | 6.998243  | 5.272359  |
| H | -10.305613 | 9.473446  | -3.836748 |
| H | -10.73826  | 8.98663   | 3.016751  |
| H | -13.849284 | -6.671196 | -1.362286 |
| H | -12.030069 | -6.998166 | 5.272809  |

**Table S3. Oligothiophene dendrimer S3**

| Method   | Time (s) | iterations | E (eV) | f   |
|----------|----------|------------|--------|-----|
| CIS      | 711.8    | 36         | 4.12   | 3.3 |
| TD-BLYP  | 94.4     | 10         | 2.10   | 0.1 |
| TD-B3LYP | 425.6    | 14         | 2.93   | 1.6 |

|   |            |           |           |
|---|------------|-----------|-----------|
| C | -0.923548  | -0.209956 | -0.243039 |
| C | -1.95488   | 0.632597  | -0.045236 |
| C | -3.262415  | 0.02088   | -0.086292 |
| C | -3.224679  | -1.30918  | -0.345057 |
| S | -1.523808  | -1.885559 | -0.518492 |
| C | 0.494096   | 0.074934  | -0.244328 |
| C | 1.518656   | -0.735038 | -0.571231 |
| C | 2.827275   | -0.128808 | -0.496882 |
| C | 2.797892   | 1.161374  | -0.081459 |
| S | 1.103957   | 1.705207  | 0.217742  |
| C | 5.869972   | -2.613983 | -1.186893 |
| C | 6.027867   | -1.501127 | -1.932391 |
| C | 4.997464   | -0.516444 | -1.757098 |
| C | 4.035805   | -0.865017 | -0.882648 |
| S | 4.371221   | -2.497647 | -0.188125 |
| C | 3.898101   | 2.073811  | 0.182962  |
| C | 4.972132   | 1.879134  | 0.972426  |
| C | 5.887415   | 2.983063  | 1.012726  |
| C | 5.511689   | 4.045924  | 0.271349  |
| S | 3.951155   | 3.716275  | -0.568307 |
| C | -4.320482  | -2.245595 | -0.534884 |
| C | -5.356097  | -2.153405 | -1.391339 |
| C | -6.280528  | -3.248342 | -1.324744 |
| C | -5.949772  | -4.203197 | -0.430608 |
| S | -4.424471  | -3.771337 | 0.427067  |
| C | -6.321832  | 2.564723  | 0.191019  |
| C | -6.504548  | 1.553962  | 1.064921  |
| C | -5.469975  | 0.558067  | 1.047337  |
| C | -4.480945  | 0.797097  | 0.166787  |
| S | -4.79203   | 2.329067  | -0.736891 |
| C | -8.218875  | 5.998798  | -0.465047 |
| C | -9.13268   | 5.01776   | -0.254973 |
| C | -8.537375  | 3.721014  | -0.034898 |
| C | -7.191154  | 3.700104  | -0.04661  |
| S | -6.541286  | 5.346584  | -0.367488 |
| C | -13.021601 | 5.720975  | 0.328851  |
| C | -12.867961 | 4.869849  | -0.705808 |
| C | -11.499742 | 4.568999  | -1.024403 |
| C | -10.594076 | 5.180678  | -0.236904 |
| S | -11.417576 | 6.20313   | 0.997985  |
| C | -8.322615  | 9.939673  | -0.955437 |

|   |            |            |           |
|---|------------|------------|-----------|
| C | -9.267174  | 9.366642   | -1.730412 |
| C | -9.328359  | 7.938227   | -1.631194 |
| C | -8.430221  | 7.399242   | -0.781386 |
| S | -7.422744  | 8.690019   | -0.021288 |
| C | -7.774877  | -7.485398  | 0.875293  |
| C | -7.915816  | -7.404292  | -0.471396 |
| C | -7.283824  | -6.237041  | -1.041708 |
| C | -6.65835   | -5.438318  | -0.157292 |
| S | -6.816721  | -6.096067  | 1.509658  |
| C | -10.028549 | -9.591872  | -3.056211 |
| C | -9.243693  | -10.406092 | -2.320636 |
| C | -8.433405  | -9.734365  | -1.344428 |
| C | -8.589443  | -8.398724  | -1.311816 |
| S | -9.800534  | -7.873398  | -2.547191 |
| C | -8.669337  | -10.239182 | 3.601779  |
| C | -9.799748  | -9.829263  | 2.988947  |
| C | -9.597505  | -8.835101  | 1.974924  |
| C | -8.312961  | -8.468484  | 1.8019    |
| S | -7.234724  | -9.378396  | 2.930084  |
| C | 7.774187   | -6.105485  | -1.031041 |
| C | 8.682469   | -5.105981  | -1.153239 |
| C | 8.086734   | -3.791741  | -1.19213  |
| C | 6.742091   | -3.769695  | -1.122706 |
| S | 6.097591   | -5.443487  | -0.969926 |
| C | 12.527973  | -5.742227  | -2.024963 |
| C | 12.43392   | -5.160026  | -0.811668 |
| C | 11.088853  | -4.893471  | -0.384832 |
| C | 10.139516  | -5.275346  | -1.258033 |
| S | 10.887498  | -5.991954  | -2.73423  |
| C | 8.649443   | -9.921949  | -0.336917 |
| C | 7.577787   | -9.844082  | -1.15345  |
| C | 7.17842    | -8.506549  | -1.47558  |
| C | 7.948865   | -7.542935  | -0.927027 |
| S | 9.250767   | -8.277182  | 0.084151  |
| C | 7.239319   | 7.507876   | -0.65351  |
| C | 7.462717   | 7.235366   | 0.656186  |
| C | 6.869471   | 5.990077   | 1.087842  |
| C | 6.199101   | 5.315192   | 0.135882  |
| S | 6.260437   | 6.205191   | -1.425944 |
| C | 9.655758   | 9.050382   | 3.450782  |
| C | 8.932405   | 9.973006   | 2.782993  |
| C | 8.10097    | 9.441329   | 1.741846  |
| C | 8.17841    | 8.106302   | 1.589918  |
| S | 9.335701   | 7.402088   | 2.786481  |
| C | 8.981518   | 10.314969  | -2.834043 |
| C | 7.649421   | 10.430627  | -2.995841 |
| C | 6.915616   | 9.452495   | -2.220594 |

|   |            |           |           |
|---|------------|-----------|-----------|
| C | 7.67689    | 8.620146  | -1.485051 |
| S | 9.426902   | 8.994005  | -1.725516 |
| C | -16.188724 | 7.056804  | 2.329339  |
| C | -16.463274 | 7.072428  | 1.001647  |
| C | -15.366192 | 6.601396  | 0.187511  |
| C | -14.264376 | 6.237816  | 0.869244  |
| S | -14.515927 | 6.457058  | 2.637011  |
| C | -17.712145 | 7.552225  | 0.40035   |
| C | -18.375965 | 8.701881  | 0.620125  |
| C | -19.569213 | 8.861749  | -0.172446 |
| C | -19.809412 | 7.83463   | -1.001404 |
| S | -18.559952 | 6.564034  | -0.857482 |
| C | -18.0751   | 8.381427  | 5.551125  |
| C | -18.834241 | 7.441756  | 4.965829  |
| C | -18.244862 | 6.880722  | 3.777766  |
| C | -17.044194 | 7.398749  | 3.455678  |
| S | -16.551991 | 8.656533  | 4.660613  |
| C | -6.952467  | 13.659166 | -0.627024 |
| C | -8.302954  | 13.69148  | -0.745151 |
| C | -8.897479  | 12.377447 | -0.836562 |
| C | -8.025587  | 11.352294 | -0.822996 |
| S | -6.340967  | 11.96236  | -0.658765 |
| C | -9.116976  | 14.907913 | -0.807005 |
| C | -8.897814  | 16.040787 | -1.501134 |
| C | -9.92399   | 17.040135 | -1.349164 |
| C | -10.929369 | 16.663    | -0.544638 |
| S | -10.675594 | 15.018329 | 0.104852  |
| C | -5.984177  | 14.733753 | -0.458226 |
| C | -4.898082  | 14.995444 | -1.213567 |
| C | -4.097675  | 16.096859 | -0.744828 |
| C | -4.573665  | 16.666483 | 0.373525  |
| S | -6.066243  | 15.871276 | 0.945121  |
| C | 16.103782  | -6.545786 | -3.554966 |
| C | 15.162258  | -7.184183 | -4.291362 |
| C | 13.81431   | -6.943369 | -3.830341 |
| C | 13.712916  | -6.152371 | -2.745969 |
| S | 15.345492  | -5.61023  | -2.210055 |
| C | 15.436327  | -8.07169  | -5.42708  |
| C | 16.273626  | -9.122383 | -5.49937  |
| C | 16.276406  | -9.794753 | -6.774245 |
| C | 15.434702  | -9.25714  | -7.670069 |
| S | 14.563275  | -7.849177 | -6.99649  |
| C | 20.064472  | -6.579878 | -3.477885 |
| C | 19.662381  | -6.16798  | -4.69045  |
| C | 18.230923  | -6.11133  | -4.836462 |
| C | 17.545162  | -6.488178 | -3.740263 |
| S | 18.682371  | -6.945194 | -2.407485 |



|   |            |            |           |
|---|------------|------------|-----------|
| C | 10.878807  | -12.933367 | 1.0024    |
| C | 9.572175   | -13.290156 | 1.05054   |
| C | 8.679276   | -12.254357 | 0.587427  |
| C | 9.280007   | -11.119475 | 0.181428  |
| S | 11.065871  | -11.263243 | 0.348663  |
| C | 9.046869   | -14.56849  | 1.553302  |
| C | 8.365402   | -15.509724 | 0.87384   |
| C | 7.938497   | -16.629908 | 1.674098  |
| C | 8.290731   | -16.531067 | 2.965207  |
| S | 9.188415   | -15.023004 | 3.294385  |
| C | 12.078768  | -13.669747 | 1.362882  |
| C | 13.150383  | -13.215817 | 2.046212  |
| C | 14.211052  | -14.175839 | 2.194954  |
| C | 13.948217  | -15.358699 | 1.617035  |
| S | 12.345459  | -15.376818 | 0.832969  |
| C | -12.396797 | -11.124984 | -5.853635 |
| C | -12.495352 | -9.774089  | -5.892855 |
| C | -11.680832 | -9.113021  | -4.899024 |
| C | -10.952044 | -9.93024   | -4.115712 |
| S | -11.249919 | -11.650498 | -4.560967 |
| C | -14.819913 | -7.331946  | -7.989711 |
| C | -14.296351 | -8.240313  | -8.826948 |
| C | -13.430134 | -9.192386  | -8.18036  |
| C | -13.300667 | -9.014114  | -6.852071 |
| S | -14.279074 | -7.593415  | -6.307316 |
| C | -14.722955 | -13.74776  | -7.700065 |
| C | -13.442151 | -14.049517 | -7.965219 |
| C | -12.501246 | -13.146362 | -7.355015 |
| C | -13.065481 | -12.155604 | -6.634635 |
| S | -14.867424 | -12.306617 | -6.656411 |
| C | 12.082167  | 10.184056  | 6.386555  |
| C | 12.136072  | 8.835805   | 6.272526  |
| C | 11.280348  | 8.31346    | 5.233524  |
| C | 10.578167  | 9.23594    | 4.547629  |
| S | 10.938491  | 10.885353  | 5.178504  |
| C | 14.878984  | 6.645753   | 8.140064  |
| C | 13.662982  | 6.194495   | 8.484372  |
| C | 12.583023  | 6.927748   | 7.873706  |
| C | 12.978233  | 7.937555   | 7.07574   |
| S | 14.779498  | 8.030809   | 7.01748   |
| C | 13.654556  | 12.322193  | 9.324212  |
| C | 13.912738  | 12.937667  | 8.159303  |
| C | 13.39637   | 12.237739  | 7.013459  |
| C | 12.753501  | 11.088075  | 7.30561   |
| S | 12.738613  | 10.80898   | 9.090895  |
| C | 6.512934   | 13.484682  | -4.883585 |
| C | 7.289967   | 12.823418  | -3.99036  |

|   |            |            |           |
|---|------------|------------|-----------|
| C | 6.967589   | 11.400122  | -3.880508 |
| C | 5.961294   | 11.031728  | -4.69454  |
| S | 5.321412   | 12.378832  | -5.6573   |
| C | 8.354399   | 13.466528  | -3.201683 |
| C | 8.381907   | 13.717727  | -1.880665 |
| C | 9.600892   | 14.330318  | -1.412934 |
| C | 10.502528  | 14.539628  | -2.384041 |
| S | 9.903497   | 13.987196  | -3.974372 |
| C | 6.512465   | 14.895902  | -5.234312 |
| C | 6.559149   | 15.967008  | -4.417394 |
| C | 6.543087   | 17.234308  | -5.099479 |
| C | 6.475916   | 17.125904  | -6.435669 |
| S | 6.435647   | 15.42221   | -6.963775 |
| C | -7.917538  | -12.631558 | 6.688829  |
| C | -8.898244  | -13.180154 | 5.928737  |
| C | -9.240019  | -12.381583 | 4.775454  |
| C | -8.541879  | -11.237495 | 4.644609  |
| S | -7.365963  | -11.062323 | 5.994444  |
| C | -9.568852  | -14.466049 | 6.173747  |
| C | -10.882633 | -14.683841 | 6.376592  |
| C | -11.242674 | -16.072659 | 6.518392  |
| C | -10.198734 | -16.909303 | 6.414478  |
| S | -8.669984  | -16.031117 | 6.127064  |
| C | -7.337961  | -13.112558 | 7.930093  |
| C | -7.972087  | -13.628005 | 9.002735  |
| C | -7.098267  | -14.013268 | 10.078867 |
| C | -5.800062  | -13.781421 | 9.827499  |
| S | -5.551746  | -13.067269 | 8.21145   |
| H | -1.827086  | 1.67796    | 0.147823  |
| H | 1.383575   | -1.747153  | -0.893271 |
| H | 4.981783   | 0.41097    | -2.291492 |
| H | 6.838088   | -1.379506  | -2.621801 |
| H | 5.126768   | 0.971665   | 1.518457  |
| H | 6.800617   | 2.962951   | 1.571245  |
| H | -5.476609  | -1.326313  | -2.05994  |
| H | -7.167723  | -3.299607  | -1.921902 |
| H | -5.47178   | -0.294634  | 1.694516  |
| H | -7.335922  | 1.518006   | 1.738743  |
| H | -9.130791  | 2.845033   | 0.126977  |
| H | -11.219333 | 3.908626   | -1.820241 |
| H | -13.698077 | 4.440075   | -1.228164 |
| H | -10.014739 | 7.34391    | -2.19695  |
| H | -9.895357  | 9.932413   | -2.387213 |
| H | -7.274086  | -6.051504  | -2.095844 |
| H | -7.753297  | -10.251063 | -0.699373 |
| H | -9.216799  | -11.467788 | -2.458431 |
| H | -10.398786 | -8.404623  | 1.410646  |

|   |            |            |           |
|---|------------|------------|-----------|
| H | -10.768667 | -10.193647 | 3.262052  |
| H | 8.680083   | -2.904164  | -1.26874  |
| H | 10.857037  | -4.443563  | 0.559256  |
| H | 13.288392  | -4.92929   | -0.208874 |
| H | 6.349145   | -8.286005  | -2.116289 |
| H | 7.088764   | -10.710142 | -1.549378 |
| H | 6.918656   | 5.656929   | 2.103809  |
| H | 7.463307   | 10.053275  | 1.138781  |
| H | 8.967063   | 11.017684  | 3.015657  |
| H | 5.845424   | 9.405983   | -2.216421 |
| H | 9.750922   | 10.900132  | -3.283712 |
| H | 5.559477   | 10.052288  | -4.825663 |
| H | -15.415113 | 6.588438   | -0.881671 |
| H | -18.037715 | 9.436155   | 1.321687  |
| H | -20.199633 | 9.724804   | -0.108823 |
| H | -18.71286  | 6.113519   | 3.196238  |
| H | -19.784207 | 7.130319   | 5.348736  |
| H | -9.955689  | 12.233665  | -0.908706 |
| H | -8.03372   | 16.180277  | -2.116833 |
| H | -9.887662  | 17.992163  | -1.83759  |
| H | -4.658263  | 14.428194  | -2.089931 |
| H | -3.210531  | 16.428152  | -1.244069 |
| H | 12.9669    | -7.395059  | -4.303538 |
| H | 16.879138  | -9.432956  | -4.673062 |
| H | 16.888164  | -10.648625 | -6.981582 |
| H | 17.744649  | -5.793456  | -5.735434 |
| H | 20.3396    | -5.897505  | -5.474224 |
| H | 7.61567    | -12.371935 | 0.612145  |
| H | 8.171773   | -15.434511 | -0.177182 |
| H | 7.396438   | -17.461778 | 1.273514  |
| H | 13.197494  | -12.224984 | 2.44983   |
| H | 15.11917   | -13.965463 | 2.721191  |
| H | -11.646376 | -8.04615   | -4.817942 |
| H | -12.924941 | -9.974333  | -8.708121 |
| H | -14.497609 | -8.255207  | -9.878334 |
| H | -11.440134 | -13.244511 | -7.463351 |
| H | -13.145508 | -14.878595 | -8.57401  |
| H | 11.235342  | 7.265388   | 5.020436  |
| H | 11.550507  | 6.701032   | 8.047918  |
| H | 13.507169  | 5.371968   | 9.151752  |
| H | 13.518866  | 12.588417  | 6.008966  |
| H | 14.455934  | 13.857171  | 8.086224  |
| H | 7.564475   | 13.474776  | -1.232326 |
| H | 9.768081   | 14.591997  | -0.388274 |
| H | 6.600054   | 15.8772    | -3.352515 |
| H | 6.576217   | 18.173095  | -4.586127 |
| H | -9.963803  | -12.706323 | 4.056824  |

|   |            |            |           |
|---|------------|------------|-----------|
| H | -11.596222 | -13.886576 | 6.434812  |
| H | -12.246644 | -16.401692 | 6.692194  |
| H | -9.035881  | -13.733418 | 9.045972  |
| H | -7.453465  | -14.438058 | 10.994983 |
| H | -20.614786 | 7.70962    | -1.689282 |
| H | -18.276583 | 8.938127   | 6.438338  |
| H | -11.802333 | 17.210909  | -0.270533 |
| H | -4.175052  | 17.49409   | 0.915798  |
| H | 15.245804  | -9.565909  | -8.673286 |
| H | 21.060338  | -6.698016  | -3.114657 |
| H | 8.102606   | -17.219692 | 3.757728  |
| H | 14.558798  | -16.232865 | 1.590152  |
| H | -15.482999 | -6.527031  | -8.212905 |
| H | -15.6035   | -14.249292 | -8.033202 |
| H | 15.832695  | 6.284931   | 8.452938  |
| H | 13.932348  | 12.624839  | 10.308575 |
| H | 11.472065  | 14.977264  | -2.305278 |
| H | 6.447189   | 17.905245  | -7.163219 |
| H | -10.192923 | -17.973641 | 6.484509  |
| H | -4.959369  | -13.969421 | 10.456303 |

**Table S4. Oligothiophene dendrimer S4**

| Method   | Time(s) | iterations | E (eV) | f   |
|----------|---------|------------|--------|-----|
| CIS      | 3508.2  | 46         | 3.97   | 2.6 |
| TD-BLYP  | 230.2   | 6          | 1.76   | 0.0 |
| TD-B3LYP | 1369.8  | 13         | 2.76   | 0.0 |

|   |              |              |              |
|---|--------------|--------------|--------------|
| C | -1.29737661  | 1.564126026  | -2.343460529 |
| C | -2.48474774  | 2.187042278  | -2.454534131 |
| C | -3.576280164 | 1.358251174  | -2.92406621  |
| C | -3.20368453  | 0.075678331  | -3.159037403 |
| S | -1.448088144 | -0.163483849 | -2.823539593 |
| C | -0.016919236 | 2.08960537   | -1.925570587 |
| C | 1.111658897  | 1.407248479  | -1.659482731 |
| C | 2.239638085  | 2.209254316  | -1.248174054 |
| C | 1.967572348  | 3.5371931    | -1.214245138 |
| S | 0.253359325  | 3.85449777   | -1.694855543 |
| C | 5.517001998  | -0.008800618 | -0.821138145 |
| C | 5.410996191  | 0.817114726  | 0.241716722  |
| C | 4.280402234  | 1.702141157  | 0.196374026  |
| C | 3.507744745  | 1.56404101   | -0.897564171 |
| S | 4.177421379  | 0.294509194  | -1.988648352 |
| C | 2.799940342  | 4.687065428  | -0.904050408 |
| C | 2.470199063  | 5.753997678  | -0.145872299 |
| C | 3.472579542  | 6.777598381  | -0.088655907 |
| C | 4.577732725  | 6.513074781  | -0.814519965 |
| S | 4.434285631  | 4.915433694  | -1.637212174 |
| C | -3.950381077 | -1.093505771 | -3.601480451 |
| C | -3.732575109 | -1.83490601  | -4.7054588   |
| C | -4.553597926 | -3.007273143 | -4.808730254 |
| C | -5.399131265 | -3.185609942 | -3.774423691 |
| S | -5.237713738 | -1.844316833 | -2.576815023 |
| C | -7.034664152 | 3.328820918  | -3.072434839 |
| C | -7.030251062 | 2.378746472  | -4.030061858 |
| C | -5.838723253 | 1.5809777    | -4.069419408 |
| C | -4.913461078 | 1.909857446  | -3.145749566 |
| S | -5.507097225 | 3.274082787  | -2.120433944 |
| C | -9.47275311  | 6.353865865  | -2.226752125 |
| C | -10.21578337 | 5.237695602  | -2.44277988  |
| C | -9.411265362 | 4.074975225  | -2.750301439 |
| C | -8.082875969 | 4.285259507  | -2.778125412 |
| S | -7.711344289 | 6.003060955  | -2.401448822 |
| C | -14.15813205 | 5.068641327  | -1.783957027 |
| C | -13.84663478 | 4.385001581  | -2.902312688 |
| C | -12.45047668 | 4.402559794  | -3.233311206 |
| C | -11.6775024  | 5.107769251  | -2.38161526  |
| S | -12.68031352 | 5.796916813  | -1.049505689 |
| C | -10.14907998 | 10.07077224  | -1.003317272 |

|   |              |              |              |
|---|--------------|--------------|--------------|
| C | -11.00905894 | 9.76690076   | -1.995927871 |
| C | -10.86049695 | 8.440488358  | -2.521617128 |
| C | -9.891744226 | 7.712164472  | -1.931178195 |
| S | -9.071898987 | 8.673567183  | -0.641283779 |
| C | -8.239511326 | -5.914572635 | -3.155529797 |
| C | -7.079451356 | -6.531663038 | -3.494512316 |
| C | -5.98472517  | -5.613754698 | -3.705521241 |
| C | -6.289094387 | -4.312377173 | -3.56284868  |
| S | -8.017097516 | -4.121341664 | -3.099555456 |
| C | -5.97145523  | -10.35769552 | -3.639857269 |
| C | -7.018000006 | -10.171961   | -4.472169554 |
| C | -7.530956162 | -8.8307496   | -4.49154175  |
| C | -6.884117029 | -7.973757034 | -3.680739151 |
| S | -5.554873275 | -8.818617314 | -2.798629328 |
| C | -11.57364403 | -7.728066785 | -1.954609748 |
| C | -11.88579132 | -6.648254983 | -2.700330758 |
| C | -10.7510925  | -5.92168373  | -3.189844973 |
| C | -9.555723341 | -6.444461439 | -2.841581672 |
| S | -9.7860667   | -7.909019946 | -1.811362025 |
| C | 7.756179094  | -3.135695161 | -1.819951789 |
| C | 8.482602206  | -2.321974446 | -1.00937295  |
| C | 7.767425922  | -1.130430973 | -0.610500054 |
| C | 6.506437031  | -1.035640316 | -1.075525618 |
| S | 6.112500848  | -2.457692315 | -2.100207482 |
| C | 12.01684797  | -3.405129433 | 0.51490538   |
| C | 12.11441213  | -2.177439177 | -0.030728396 |
| C | 10.8947321   | -1.692920231 | -0.616725678 |
| C | 9.856172402  | -2.54881369  | -0.537840508 |
| S | 10.34273503  | -4.050368022 | 0.335367984  |
| C | 8.116014646  | -6.707226657 | -3.515148094 |
| C | 9.29504473   | -6.06036037  | -3.596768254 |
| C | 9.291990495  | -4.747463953 | -3.016859924 |
| C | 8.114127247  | -4.383290931 | -2.468838588 |
| S | 6.891425286  | -5.697480635 | -2.667663175 |
| C | 8.088895319  | 8.36032744   | -1.128726592 |
| C | 7.089859158  | 9.256381071  | -1.334544436 |
| C | 5.771599865  | 8.67407317   | -1.244135046 |
| C | 5.747025423  | 7.355943855  | -0.974203928 |
| S | 7.420895666  | 6.718199432  | -0.804729899 |
| C | 7.715828989  | 12.93547419  | -2.769496187 |
| C | 7.161448949  | 13.01961615  | -1.542523518 |
| C | 6.903064489  | 11.7503007   | -0.920396596 |
| C | 7.259239901  | 10.6812524   | -1.656140088 |
| S | 7.944615995  | 11.2075583   | -3.241807617 |
| C | 12.03554134  | 8.389648711  | -1.354241236 |
| C | 11.64108028  | 9.557843037  | -0.813121359 |
| C | 10.20589709  | 9.645009946  | -0.672282487 |

|   |              |              |              |
|---|--------------|--------------|--------------|
| C | 9.524094119  | 8.572932941  | -1.121197091 |
| S | 10.66718689  | 7.321056041  | -1.745604594 |
| C | -17.69934831 | 6.061564534  | -0.260859517 |
| C | -17.62928274 | 4.712860049  | -0.384462748 |
| C | -16.35575612 | 4.253836439  | -0.893671726 |
| C | -15.47194882 | 5.223365371  | -1.1864821   |
| S | -16.16317459 | 6.840748615  | -0.802180698 |
| C | -18.7122489  | 3.773150698  | -0.085304251 |
| C | -20.01719754 | 3.842400647  | -0.407951529 |
| C | -20.79944859 | 2.720071245  | 0.023779087  |
| C | -20.10121756 | 1.768292156  | 0.677345415  |
| S | -18.36244931 | 2.239244987  | 0.803043683  |
| C | -20.57905316 | 8.105257062  | 1.577622221  |
| C | -20.34611776 | 8.644022485  | 0.361841283  |
| C | -19.31795841 | 7.984678978  | -0.388707262 |
| C | -18.76777498 | 6.919451645  | 0.229957305  |
| S | -19.49108766 | 6.698031396  | 1.868060333  |
| C | -9.307238763 | 13.47902861  | 0.865635314  |
| C | -10.62810873 | 13.20712135  | 1.017833375  |
| C | -11.03378069 | 11.98269727  | 0.363083439  |
| C | -10.04932188 | 11.31720707  | -0.265311956 |
| S | -8.487174924 | 12.19406481  | -0.09869986  |
| C | -11.56940663 | 14.00183393  | 1.807391128  |
| C | -11.37268168 | 14.6496084   | 2.972037562  |
| C | -12.53499472 | 15.30708403  | 3.495006799  |
| C | -13.64559578 | 15.16261111  | 2.743114825  |
| S | -13.28744029 | 14.18085106  | 1.272941607  |
| C | -8.5099436   | 14.60972286  | 1.316964763  |
| C | -7.394319949 | 14.59366583  | 2.07318114   |
| C | -6.808125876 | 15.88317342  | 2.301087107  |
| C | -7.464048534 | 16.90509011  | 1.711866155  |
| S | -8.894486983 | 16.29652388  | 0.794782083  |
| C | 14.8081858   | -5.887931425 | 1.887294362  |
| C | 14.87087427  | -4.724181559 | 2.580186737  |
| C | 13.86631014  | -3.76474182  | 2.177092629  |
| C | 13.05983979  | -4.167490316 | 1.179764901  |
| S | 13.48436881  | -5.840289391 | 0.663993803  |
| C | 15.86018277  | -4.412376125 | 3.613742941  |
| C | 17.19472077  | -4.581842376 | 3.594144866  |
| C | 17.8691702   | -4.149155384 | 4.784297462  |
| C | 17.05921458  | -3.637381854 | 5.734199698  |
| S | 15.33988997  | -3.680398145 | 5.181482766  |
| C | 16.75855808  | -9.24558376  | 2.761530588  |
| C | 16.9466496   | -8.940189594 | 1.460290588  |
| C | 16.28354337  | -7.742440043 | 1.033588412  |
| C | 15.59957909  | -7.104186084 | 2.004994405  |
| S | 15.71160817  | -8.014605469 | 3.55952054   |

|   |              |              |              |
|---|--------------|--------------|--------------|
| C | 6.77208408   | -10.0753047  | -5.148786942 |
| C | 7.767332192  | -10.3768461  | -4.277166873 |
| C | 8.341141187  | -9.210424241 | -3.642986603 |
| C | 7.783358489  | -8.039565607 | -3.992867517 |
| S | 6.46804975   | -8.298460106 | -5.195449667 |
| C | 8.196250319  | -11.73166516 | -3.921845188 |
| C | 7.44735885   | -12.81533928 | -3.644975562 |
| C | 8.196090499  | -13.98285143 | -3.276715971 |
| C | 9.532966385  | -13.80671893 | -3.256262912 |
| S | 9.954371021  | -12.11799978 | -3.738071331 |
| C | 6.000815841  | -10.95549176 | -6.011731982 |
| C | 6.449407052  | -11.8035502  | -6.956044365 |
| C | 5.420818449  | -12.53476937 | -7.638329619 |
| C | 4.167125841  | -12.24897919 | -7.229033418 |
| S | 4.196502218  | -11.01722858 | -5.910590413 |
| C | -3.464547284 | -13.34623151 | -2.85609251  |
| C | -4.676775173 | -13.86059336 | -3.18025462  |
| C | -5.666731875 | -12.85135981 | -3.477120117 |
| C | -5.230252882 | -11.57898315 | -3.394431195 |
| S | -3.493754933 | -11.54576083 | -2.920963843 |
| C | -5.490217408 | -17.73930637 | -2.677804141 |
| C | -5.713844404 | -17.39503445 | -3.963043345 |
| C | -5.45296826  | -16.01461414 | -4.259080652 |
| C | -5.018449016 | -15.28991729 | -3.211555581 |
| S | -4.940691458 | -16.30770279 | -1.72675184  |
| C | -0.119150359 | -15.4500885  | -2.38706871  |
| C | -0.198287125 | -14.50340217 | -1.428211929 |
| C | -1.374493188 | -13.68774069 | -1.498495042 |
| C | -2.216251217 | -14.0013951  | -2.504920614 |
| S | -1.550758437 | -15.36678829 | -3.48115644  |
| C | 8.54008164   | 16.25406754  | -4.792354113 |
| C | 9.069432786  | 15.19582675  | -5.456071588 |
| C | 8.814122538  | 13.93005916  | -4.810343671 |
| C | 8.113344998  | 14.00120833  | -3.662347312 |
| S | 7.686734626  | 15.71256039  | -3.297032109 |
| C | 11.63380827  | 15.5942387   | -8.496329599 |
| C | 10.59510671  | 14.82269634  | -8.877954684 |
| C | 9.597320285  | 14.6289633   | -7.863163472 |
| C | 9.854140365  | 15.25206816  | -6.697502611 |
| S | 11.42489159  | 16.13450157  | -6.786437314 |
| C | 8.648497568  | 20.21112162  | -5.156992216 |
| C | 8.409577057  | 19.65366726  | -6.363041622 |
| C | 8.345679195  | 18.22223233  | -6.354742619 |
| C | 8.543958486  | 17.66018358  | -5.145399838 |
| S | 8.830354028  | 18.93437746  | -3.895511739 |
| C | 14.36918539  | 11.72266607  | 0.608238447  |
| C | 13.72467622  | 10.54845899  | 0.410159748  |



|   |              |              |              |
|---|--------------|--------------|--------------|
| C | 12.53525687  | 10.67227192  | -0.429770931 |
| C | 12.31262808  | 11.93558239  | -0.836945067 |
| S | 13.54007907  | 13.07430698  | -0.245590527 |
| C | 14.13415521  | 9.28631662   | 1.047775787  |
| C | 15.10738369  | 8.429165254  | 0.694825968  |
| C | 15.25199899  | 7.296216209  | 1.568594159  |
| C | 14.3794156   | 7.270886752  | 2.595324843  |
| S | 13.29325362  | 8.70926358   | 2.537584503  |
| C | 15.54879563  | 12.02531555  | 1.411069529  |
| C | 15.62044315  | 12.78628528  | 2.520313145  |
| C | 16.94181868  | 12.92588744  | 3.062031936  |
| C | 17.90193139  | 12.290953    | 2.357673119  |
| S | 17.18887388  | 11.44321145  | 0.937183666  |
| C | -13.7166298  | -10.731489   | -0.469229171 |
| C | -14.34436776 | -9.559518985 | -0.193913692 |
| C | -13.63585535 | -8.401212516 | -0.686402482 |
| C | -12.48532289 | -8.667343882 | -1.33213664  |
| S | -12.18320146 | -10.4407267  | -1.370824293 |
| C | -15.60419218 | -9.410975621 | 0.550960158  |
| C | -16.78796776 | -8.954501007 | 0.100187516  |
| C | -17.830706   | -8.918143119 | 1.08937251   |
| C | -17.44795978 | -9.333840316 | 2.313669373  |
| S | -15.70860233 | -9.811240519 | 2.307036442  |
| C | -14.13283544 | -12.09114515 | -0.181649509 |
| C | -15.37531078 | -12.61633022 | -0.222125845 |
| C | -15.44070222 | -14.01104983 | 0.100727744  |
| C | -14.24882862 | -14.5719139  | 0.394437003  |
| S | -12.92814629 | -13.35272042 | 0.285620871  |
| C | -5.422735456 | -20.82471602 | -0.526273703 |
| C | -5.151526748 | -19.44445625 | -0.852053705 |
| C | -5.606657427 | -19.0381461  | -2.052589243 |
| S | -6.438215302 | -20.39497052 | -2.896847947 |
| C | -6.086275921 | -21.4879649  | -1.505293666 |
| C | 2.054248042  | -18.37679654 | -3.318176188 |
| C | 0.854311316  | -17.57186066 | -3.337205759 |
| C | 0.900363711  | -16.45712797 | -2.584130069 |
| S | 2.496413804  | -16.32232236 | -1.758493839 |
| C | 3.023280692  | -17.87491799 | -2.515272033 |
| C | -19.85603978 | -8.88376174  | 5.165864408  |
| C | -19.20302757 | -8.541195215 | 3.922065379  |
| C | -18.25673116 | -9.406755977 | 3.515571315  |
| S | -18.10473098 | -10.76690456 | 4.685986117  |
| C | -19.39703388 | -10.03590251 | 5.711821058  |
| C | 0.620405914  | -13.07862002 | -8.172062523 |
| C | 1.666819813  | -12.2980678  | -7.554358506 |
| C | 2.911537793  | -12.79071796 | -7.699640502 |
| S | 2.871002749  | -14.32746043 | -8.637476908 |

|   |              |              |              |
|---|--------------|--------------|--------------|
| C | 1.078672522  | -14.19346511 | -8.792343208 |
| C | 12.60687805  | -15.68637497 | -2.173517288 |
| C | 11.83338743  | -14.51137489 | -2.499976174 |
| C | 10.5710366   | -14.74883281 | -2.904166654 |
| S | 10.25146033  | -16.52064791 | -2.939870495 |
| C | 11.92514184  | -16.84487411 | -2.34743503  |
| C | 18.04758663  | -12.55726395 | 3.982401191  |
| C | 17.48000698  | -11.63654327 | 3.026209074  |
| C | 17.28555121  | -10.38527038 | 3.485327717  |
| S | 17.80842981  | -10.25902188 | 5.202837363  |
| C | 18.28137935  | -11.99737882 | 5.195577282  |
| C | 17.26897639  | -2.125282879 | 9.173184947  |
| C | 16.60333998  | -2.555145109 | 7.965570956  |
| C | 17.4018993   | -3.120216111 | 7.039625274  |
| S | 19.10174699  | -3.178850224 | 7.634166947  |
| C | 18.59948705  | -2.383547931 | 9.174157252  |
| C | 14.73845475  | 17.12702601  | -9.969379464 |
| C | 13.69968331  | 16.9565701   | -8.98030716  |
| C | 12.79522836  | 15.99821235  | -9.257270806 |
| S | 13.1920957   | 15.19727698  | -10.82068114 |
| C | 14.62768645  | 16.27287874  | -11.01626839 |
| C | 8.934840893  | 23.61533263  | -3.58080383  |
| C | 8.819296822  | 22.17571393  | -3.58718134  |
| C | 8.754704879  | 21.60944329  | -4.807431997 |
| S | 8.833664086  | 22.87366088  | -6.087715123 |
| C | 8.947097644  | 24.15642618  | -4.823429404 |
| C | 14.18726536  | 4.162219483  | 4.705477624  |
| C | 14.30923612  | 4.924271314  | 3.484164782  |
| C | 14.25551395  | 6.260588126  | 3.628898924  |
| S | 14.02662802  | 6.687591354  | 5.362138311  |
| C | 14.01106023  | 4.932636703  | 5.809149329  |
| C | 21.48031827  | 12.90589951  | 3.328362347  |
| C | 20.08359653  | 13.23441036  | 3.163155907  |
| C | 19.32447363  | 12.25676501  | 2.632911223  |
| S | 20.32674557  | 10.8034562   | 2.286113201  |
| C | 21.78850976  | 11.65247423  | 2.911988684  |
| C | -7.304222521 | 20.65766348  | 1.491344624  |
| C | -7.898957405 | 19.35506482  | 1.305281161  |
| C | -7.164655925 | 18.31868179  | 1.752830549  |
| S | -5.62239248  | 18.91108298  | 2.471396977  |
| C | -6.096682116 | 20.61324449  | 2.106138357  |
| C | -17.32283222 | 15.91060282  | 3.007296025  |
| C | -16.15889123 | 15.19799904  | 2.535318572  |
| C | -14.97926003 | 15.66607327  | 2.985240218  |
| S | -15.23815425 | 17.09619807  | 4.048495673  |
| C | -17.02225934 | 16.95186684  | 3.822265317  |
| C | -22.99194847 | 9.904105541  | 3.826890997  |

|   |              |              |              |
|---|--------------|--------------|--------------|
| C | -21.99488292 | 9.789417472  | 2.789932229  |
| C | -21.5497561  | 8.538386951  | 2.562352082  |
| S | -22.36215386 | 7.373399411  | 3.667291913  |
| C | -23.30291864 | 8.718674096  | 4.408726848  |
| C | -20.61315696 | -1.587945762 | 2.294600889  |
| C | -19.8482738  | -0.451294705 | 1.839694998  |
| C | -20.56013976 | 0.512590644  | 1.224731101  |
| S | -22.30039764 | 0.050443976  | 1.151727149  |
| C | -21.93423151 | -1.499149595 | 2.002203295  |
| C | -14.22133109 | -18.08149171 | 1.737756804  |
| C | -14.73899137 | -16.74573173 | 1.545680252  |
| C | -13.98429596 | -15.94650236 | 0.769081136  |
| S | -12.52337082 | -16.82412303 | 0.195443641  |
| C | -13.0502761  | -18.29899569 | 1.089338473  |
| C | 5.997190577  | -19.83981954 | -1.331269092 |
| C | 4.59324713   | -19.56786106 | -1.50619497  |
| C | 4.325181772  | -18.43004524 | -2.17316681  |
| S | 5.862145569  | -17.592867   | -2.636022278 |
| C | 6.797996458  | -18.9015679  | -1.859428407 |
| C | -22.06231162 | -6.644005309 | 7.248040368  |
| C | -20.95336535 | -7.536276287 | 7.020027405  |
| C | -20.86455923 | -8.002306062 | 5.759834504  |
| S | -22.20493627 | -7.335611853 | 4.745111494  |
| C | -22.81404693 | -6.42789951  | 6.157850476  |
| C | -19.70357376 | -11.87742289 | 8.970105304  |
| C | -19.0109313  | -11.14737839 | 7.940525368  |
| C | -19.79559626 | -10.74018714 | 6.921964985  |
| S | -21.50113155 | -11.27938047 | 7.183522976  |
| C | -21.01475864 | -12.0318879  | 8.727500066  |
| C | -15.35324233 | -20.67865909 | 4.224473654  |
| C | -14.38231195 | -19.86290847 | 3.541063953  |
| C | -14.90089086 | -19.0494946  | 2.602037485  |
| S | -16.6972025  | -19.25272659 | 2.514033041  |
| C | -16.61371389 | -20.47957907 | 3.81014929   |
| C | -10.35053038 | -20.90820187 | 0.999499508  |
| C | -10.90570969 | -19.60840419 | 1.274645598  |
| C | -12.21845196 | -19.48965609 | 0.989753059  |
| S | -12.86219802 | -21.0411822  | 0.319314982  |
| C | -11.24324353 | -21.77496465 | 0.496979978  |
| C | -6.391363507 | -25.22655326 | -1.4514172   |
| C | -5.720285564 | -23.96772115 | -1.262597738 |
| C | -6.464939304 | -22.88799937 | -1.575186663 |
| S | -8.103291469 | -23.39541336 | -2.152419709 |
| C | -7.643961517 | -25.10428429 | -1.918152182 |
| C | -3.657532069 | -21.98936995 | 2.594320301  |
| C | -3.744071967 | -21.44243439 | 1.262858759  |
| C | -4.993566756 | -21.38464221 | 0.76390027   |

|   |              |              |              |
|---|--------------|--------------|--------------|
| S | -6.182572927 | -22.01308339 | 1.969388768  |
| C | -4.845984662 | -22.33936484 | 3.108865949  |
| C | 2.944729556  | -21.2755789  | -5.559177245 |
| C | 3.171953475  | -20.00744897 | -4.913082879 |
| C | 2.170577618  | -19.606745   | -4.108528077 |
| S | 0.831043415  | -20.82452762 | -4.110891532 |
| C | 1.765744947  | -21.83618166 | -5.250371794 |
| C | -1.256048129 | -16.89586533 | -9.937660192 |
| C | -0.756116327 | -15.90140805 | -9.025288849 |
| C | 0.335927187  | -15.24473588 | -9.464165076 |
| S | 0.830408683  | -15.85457638 | -11.0941981  |
| C | -0.537758426 | -17.000633   | -11.06679654 |
| C | -2.832839714 | -11.87389535 | -7.265949677 |
| C | -1.503165994 | -12.36455531 | -7.002027721 |
| C | -0.779619129 | -12.63458051 | -8.105723477 |
| S | -1.734887785 | -12.26650623 | -9.593687232 |
| C | -3.113888844 | -11.765744   | -8.573501716 |
| C | 13.66149233  | -20.16934379 | -2.231345691 |
| C | 13.53286329  | -18.77463361 | -2.563024515 |
| C | 12.37074943  | -18.21489739 | -2.171616226 |
| S | 11.32827003  | -19.43975835 | -1.341239511 |
| C | 12.59250105  | -20.6739686  | -1.595849985 |
| C | 16.24309188  | -14.95485739 | -1.504198573 |
| C | 15.03875562  | -14.9984829  | -2.295412324 |
| C | 13.98369971  | -15.55767304 | -1.671921346 |
| S | 14.43467613  | -16.06717187 | -0.000693953 |
| C | 16.09715677  | -15.47554046 | -0.275528391 |
| C | 20.23053314  | -13.83289357 | 7.824863786  |
| C | 19.9236389   | -13.4129737  | 6.483262003  |
| C | 18.85596166  | -12.5945374  | 6.38796373   |
| S | 18.14998213  | -12.28218231 | 8.024004161  |
| C | 19.40071741  | -13.3263064  | 8.750565954  |
| C | 19.15577738  | -15.87083531 | 2.561142906  |
| C | 19.19151601  | -14.43891916 | 2.7314395    |
| C | 18.29984387  | -13.96140061 | 3.621067695  |
| S | 17.31545879  | -15.30636722 | 4.312898129  |
| C | 18.22616432  | -16.4766081  | 3.318135954  |
| C | 20.65029794  | -2.103946057 | 12.30239938  |
| C | 19.49049917  | -2.460422419 | 11.52874034  |
| C | 19.58320416  | -2.159229347 | 10.21816799  |
| S | 21.18227712  | -1.395012304 | 9.855065343  |
| C | 21.62902665  | -1.540376025 | 11.57678204  |
| C | 14.8710175   | -1.05448663  | 11.87600355  |
| C | 15.4325566   | -1.957348128 | 10.90252905  |
| C | 16.50975437  | -1.475957257 | 10.25196086  |
| S | 16.89521111  | 0.194079293  | 10.81827498  |
| C | 15.52122222  | 0.116760151  | 11.95778729  |

|   |              |             |              |
|---|--------------|-------------|--------------|
| C | 14.78045176  | 0.461193316 | 4.650849789  |
| C | 15.24451115  | 1.858558523 | 4.698050274  |
| C | 14.1915203   | 2.683392726 | 4.676102587  |
| C | 12.92197718  | 1.855946921 | 4.582817657  |
| C | 13.44620012  | 0.443451147 | 4.585432387  |
| C | 13.24222636  | 4.6396057   | 9.437900873  |
| C | 13.2346968   | 5.343507128 | 8.15174247   |
| C | 13.80000904  | 4.573643982 | 7.20441581   |
| C | 14.23862528  | 3.267636152 | 7.846322793  |
| C | 13.82143933  | 3.446400491 | 9.281484071  |
| C | 23.39241237  | 15.49076887 | 5.294633497  |
| C | 22.35293308  | 14.51771651 | 5.069818653  |
| C | 22.42081277  | 13.89393256 | 3.877570769  |
| S | 23.82100619  | 14.51355162 | 2.920922664  |
| C | 24.24557833  | 15.60971839 | 4.26574685   |
| C | 17.41271025  | 15.84271955 | -13.49173539 |
| C | 16.84590199  | 16.0100413  | -12.1796972  |
| C | 15.50106217  | 16.10045785 | -12.16316758 |
| S | 14.83650419  | 15.96889172 | -13.84068078 |
| C | 16.49684123  | 15.79641471 | -14.47208355 |
| C | 17.45939175  | 19.47627918 | -8.840802036 |
| C | 16.60556111  | 18.31833795 | -8.752402379 |
| C | 15.76890877  | 18.16150872 | -9.796710534 |
| S | 15.98745196  | 19.50083947 | -10.98721896 |
| C | 17.2627432   | 20.20257993 | -9.951785223 |
| C | 8.479747611  | 27.83335987 | -5.40059723  |
| C | 8.181451482  | 26.55526752 | -4.810269013 |
| C | 8.981631864  | 25.55281449 | -5.223065235 |
| S | 10.1924467   | 26.16002673 | -6.421763267 |
| C | 9.502241296  | 27.79861881 | -6.269793719 |
| C | 8.60233758   | 25.04894866 | -0.113376878 |
| C | 8.208776712  | 24.25131706 | -1.247156356 |
| C | 9.031195058  | 24.34835774 | -2.310417174 |
| S | 10.40186051  | 25.46528061 | -1.946920007 |
| C | 9.73036728   | 25.74690667 | -0.316184049 |
| C | -4.466612184 | 23.72678875 | 3.416796084  |
| C | -5.571768315 | 22.845275   | 3.148772962  |
| C | -5.231017039 | 21.70316159 | 2.518530245  |
| S | -3.447684128 | 21.65311105 | 2.218572267  |
| C | -3.28360302  | 23.24971755 | 2.998401471  |
| C | -9.656444801 | 23.48639059 | 0.674737344  |
| C | -9.226116928 | 22.29541295 | 1.3634908    |
| C | -7.995563152 | 21.8672294  | 1.020866745  |
| S | -7.278708097 | 22.94674353 | -0.235904595 |
| C | -8.751685178 | 23.95657111 | -0.197550739 |
| C | -19.63002678 | 19.46825178 | 4.791544114  |
| C | -18.9562863  | 18.56501187 | 3.896796696  |

|   |              |              |              |
|---|--------------|--------------|--------------|
| C | -17.90634906 | 17.92029358  | 4.444738005  |
| S | -17.68293939 | 18.42530925  | 6.167685423  |
| C | -19.08611442 | 19.51752982  | 6.017889942  |
| C | -20.53405859 | 14.82291955  | 1.359769072  |
| C | -19.19949491 | 15.36702126  | 1.397627954  |
| C | -18.67413037 | 15.46538757  | 2.634239977  |
| S | -19.8395541  | 14.84963883  | 3.86696063   |
| C | -21.01666692 | 14.50073199  | 2.57052545   |
| C | -24.70994307 | 13.25382646  | 4.07240362   |
| C | -24.37084761 | 11.99607278  | 3.452346402  |
| C | -23.55938596 | 11.21294211  | 4.189509883  |
| S | -23.13990337 | 12.02453002  | 5.745075617  |
| C | -24.1451506  | 13.42458021  | 5.278846639  |
| C | -24.18724125 | -4.477214221 | 2.362752578  |
| C | -22.95368616 | -3.803174959 | 2.05569738   |
| C | -22.9943118  | -2.46553455  | 2.22277316   |
| S | -24.63460479 | -1.948347976 | 2.786418219  |
| C | -25.16997463 | -3.650562321 | 2.75519416   |
| C | -18.46078823 | -4.406008022 | 3.572414045  |
| C | -18.93592294 | -3.456802571 | 2.596294489  |
| C | -19.95418859 | -2.683441805 | 3.021063311  |
| S | -20.38966016 | -3.090764202 | 4.723952096  |
| C | -19.12078219 | -4.347557437 | 4.740163971  |
| C | -26.19378264 | 8.434225661  | 6.784429476  |
| C | -25.50844955 | 8.919203124  | 5.616048279  |
| C | -24.2586843  | 8.435024413  | 5.464286961  |
| S | -23.8515785  | 7.300498281  | 6.812924773  |
| C | -25.46763604 | 7.574425669  | 7.516408546  |
| C | 25.10784705  | 10.09443726  | 3.704249582  |
| C | 23.92633066  | 10.86553249  | 3.987449983  |
| C | 23.06115766  | 10.95444837  | 2.957607955  |
| S | 23.68509215  | 10.04262509  | 1.52531697   |
| C | 25.1354711   | 9.589055095  | 2.460926283  |
| H | -2.617989366 | 3.225585139  | -2.230978279 |
| H | 1.173043051  | 0.340135015  | -1.716366696 |
| H | 6.087494237  | 0.784802512  | 1.070920473  |
| H | 4.052050039  | 2.392703279  | 0.981930955  |
| H | 1.539189232  | 5.820688779  | 0.379377603  |
| H | 3.370225988  | 7.664817075  | 0.501716092  |
| H | -2.997890218 | -1.569350838 | -5.43814968  |
| H | -4.506158044 | -3.681925823 | -5.638711104 |
| H | -7.835681508 | 2.258794459  | -4.725382119 |
| H | -5.685755051 | 0.807016438  | -4.791604337 |
| H | -9.842483683 | 3.105799553  | -2.893821224 |
| H | -14.5868791  | 3.896270839  | -3.502385817 |
| H | -12.05515007 | 3.913105773  | -4.10025571  |
| H | -11.72023982 | 10.47062829  | -2.37697534  |

|   |              |              |              |
|---|--------------|--------------|--------------|
| H | -11.45591052 | 8.061836108  | -3.325992985 |
| H | -5.000994414 | -5.951008255 | -3.958553138 |
| H | -7.412909736 | -10.95240279 | -5.089781537 |
| H | -8.349104585 | -8.530552757 | -5.113542231 |
| H | -12.89551386 | -6.381281195 | -2.935547826 |
| H | -10.84181434 | -5.048518739 | -3.803331273 |
| H | 8.214087443  | -0.388792946 | 0.01919613   |
| H | 13.03137547  | -1.624359535 | -0.047025121 |
| H | 10.82020496  | -0.739504742 | -1.099611897 |
| H | 10.15158104  | -6.482942918 | -4.080827013 |
| H | 10.14595823  | -4.103586717 | -3.029952436 |
| H | 4.884490776  | 9.245896673  | -1.423989095 |
| H | 6.941697206  | 13.95193641  | -1.063753297 |
| H | 6.47324238   | 11.66057149  | 0.057011357  |
| H | 13.02844473  | 8.066401873  | -1.566172365 |
| H | 9.726491345  | 10.48826107  | -0.22149536  |
| H | -16.13670822 | 3.216010988  | -1.039484511 |
| H | -20.4342078  | 4.667699985  | -0.946930736 |
| H | -21.85077592 | 2.644591387  | -0.166225499 |
| H | -20.90654431 | 9.4715728    | -0.021916367 |
| H | -19.02521701 | 8.292977189  | -1.371823874 |
| H | -12.03452717 | 11.60661681  | 0.416876899  |
| H | -10.42866537 | 14.65783974  | 3.475121718  |
| H | -12.52828991 | 15.84508866  | 4.420911989  |
| H | -6.987749436 | 13.68882231  | 2.4772278    |
| H | -5.931850515 | 16.02135183  | 2.900772853  |
| H | 13.78081225  | -2.798372686 | 2.630624142  |
| H | 17.71019367  | -5.001756469 | 2.755365233  |
| H | 18.9305433   | -4.224893546 | 4.905188956  |
| H | 17.56430374  | -9.527426101 | 0.812101443  |
| H | 16.33994088  | -7.369202392 | 0.031190346  |
| H | 9.117941073  | -9.280194009 | -2.909630162 |
| H | 6.37788885   | -12.80256212 | -3.678262537 |
| H | 7.724936726  | -14.90776512 | -3.013069248 |
| H | 7.490085154  | -11.91369411 | -7.181304115 |
| H | 5.630920386  | -13.2350267  | -8.420581971 |
| H | -6.682364868 | -13.10696673 | -3.698336304 |
| H | -6.037248291 | -18.09518581 | -4.70613608  |
| H | -5.570888043 | -15.59859638 | -5.239155418 |
| H | 0.542665112  | -14.38336081 | -0.66465049  |
| H | -1.579858838 | -12.90327809 | -0.799010153 |
| H | 9.188466776  | 13.01073792  | -5.211663288 |
| H | 10.51240783  | 14.4005506   | -9.858691224 |
| H | 8.713609097  | 14.04435996  | -8.022348064 |
| H | 8.263993113  | 20.23176618  | -7.252489775 |
| H | 8.147172245  | 17.644357    | -7.232925953 |
| H | 11.52493818  | 12.28376903  | -1.467198565 |

|   |              |              |              |
|---|--------------|--------------|--------------|
| H | 15.74347501  | 8.595103979  | -0.150983423 |
| H | 16.0093785   | 6.551012455  | 1.438528971  |
| H | 14.7551476   | 13.23113246  | 2.967589946  |
| H | 17.14669885  | 13.46184155  | 3.965844956  |
| H | -13.98743762 | -7.4054382   | -0.509765553 |
| H | -16.94434962 | -8.6675975   | -0.920296262 |
| H | -18.83490885 | -8.61975334  | 0.867248814  |
| H | -16.23621508 | -12.0425253  | -0.493533881 |
| H | -16.35218465 | -14.57222858 | 0.079489743  |
| H | -4.630692816 | -18.79951349 | -0.17476161  |
| H | -0.002621542 | -17.84756873 | -3.916753641 |
| H | -19.42349257 | -7.634821466 | 3.396836575  |
| H | 1.458006897  | -11.37646118 | -7.051205263 |
| H | 12.23198588  | -13.52499568 | -2.381536768 |
| H | 17.19732527  | -11.9465256  | 2.041300297  |
| H | 15.55304407  | -2.4066243   | 7.821508627  |
| H | 13.64552348  | 17.57818427  | -8.11035653  |
| H | 8.8071512    | 21.60901329  | -2.678995344 |
| H | 14.41312997  | 4.450225817  | 2.52932186   |
| H | 19.69823001  | 14.20351028  | 3.40402281   |
| H | -8.850200142 | 19.23607574  | 0.828677248  |
| H | -16.24362457 | 14.33413694  | 1.908768122  |
| H | -21.61289632 | 10.64727848  | 2.275661218  |
| H | -18.79357439 | -0.383468799 | 2.009342956  |
| H | -15.63295542 | -16.40611065 | 2.026748837  |
| H | 6.365422698  | -20.70555215 | -0.820567961 |
| H | 3.820130073  | -20.21125271 | -1.139323583 |
| H | 7.863905881  | -18.85899009 | -1.85704616  |
| H | -22.25755233 | -6.187479337 | 8.196516296  |
| H | -20.25202994 | -7.804236499 | 7.783435819  |
| H | -23.66879428 | -5.799024258 | 6.052773608  |
| H | -19.21721022 | -12.25679136 | 9.8451012    |
| H | -17.96078271 | -10.9390146  | 7.975705479  |
| H | -21.74594946 | -12.52407783 | 9.328395647  |
| H | -15.09096278 | -21.37442647 | 4.994847553  |
| H | -13.33532761 | -19.89383584 | 3.760534736  |
| H | -17.50782493 | -20.94990717 | 4.152048491  |
| H | -9.324810483 | -21.15646904 | 1.177647689  |
| H | -10.32839534 | -18.79824282 | 1.671983856  |
| H | -11.08632089 | -22.78943483 | 0.208277399  |
| H | -5.929558422 | -26.17028041 | -1.246109687 |
| H | -4.712562392 | -23.88805836 | -0.911834085 |
| H | -8.343920302 | -25.87568942 | -2.14799335  |
| H | -2.731513311 | -22.10537096 | 3.119127666  |
| H | -2.887344874 | -21.11346743 | 0.709669015  |
| H | -5.056010968 | -22.76540937 | 4.063915455  |
| H | 3.650025829  | -21.72218987 | -6.229582649 |



|   |              |              |              |
|---|--------------|--------------|--------------|
| H | 4.05761833   | -19.42584724 | -5.06444287  |
| H | 1.358553831  | -22.76035175 | -5.593396624 |
| H | -2.116175077 | -17.49837887 | -9.729792878 |
| H | -1.203653243 | -15.69847198 | -8.074588392 |
| H | -0.692856779 | -17.65798605 | -11.89236582 |
| H | -3.525045563 | -11.62225999 | -6.488943547 |
| H | -1.123241668 | -12.51304591 | -6.011415079 |
| H | -4.016772748 | -11.43077799 | -9.03237538  |
| H | 14.52703789  | -20.7495833  | -2.476725666 |
| H | 14.28903009  | -18.22377397 | -3.082102425 |
| H | 12.43551897  | -21.6707213  | -1.250305349 |
| H | 17.16508708  | -14.54782581 | -1.866081978 |
| H | 14.98329882  | -14.62240567 | -3.297375077 |
| H | 16.82433299  | -15.5671419  | 0.499829174  |
| H | 21.04804127  | -14.48278739 | 8.060057633  |
| H | 20.49502017  | -13.7155861  | 5.630996136  |
| H | 19.4144851   | -13.47666835 | 9.80644294   |
| H | 19.81374126  | -16.39870682 | 1.90126052   |
| H | 19.87535795  | -13.80434595 | 2.204250417  |
| H | 18.00116175  | -17.51742296 | 3.38405978   |
| H | 20.72522768  | -2.27880988  | 13.3558799   |
| H | 18.62612333  | -2.92970853  | 11.95034911  |
| H | 22.58289678  | -1.194638098 | 11.90585712  |
| H | 14.01839703  | -1.298386492 | 12.47595368  |
| H | 15.03371158  | -2.933824756 | 10.71379503  |
| H | 15.31315792  | 0.947216893  | 12.59453881  |
| H | 15.427341    | -0.390837035 | 4.680818766  |
| H | 16.27242744  | 2.154379274  | 4.756360986  |
| H | 12.3633954   | 2.088250249  | 3.678438943  |
| H | 12.25215008  | 2.050956725  | 5.416717901  |
| H | 12.81788358  | -0.42293561  | 4.555340496  |
| H | 12.83953476  | 5.041519748  | 10.34475353  |
| H | 12.83025114  | 6.324265067  | 8.006851201  |
| H | 15.30862848  | 3.114169487  | 7.744599852  |
| H | 13.76039895  | 2.401973197  | 7.400930153  |
| H | 13.97180419  | 2.698252814  | 10.03154411  |
| H | 23.47478008  | 16.06036303  | 6.197589985  |
| H | 21.5917416   | 14.29912126  | 5.791716197  |
| H | 25.09483725  | 16.24943236  | 4.179482028  |
| H | 18.4655071   | 15.75697211  | -13.66581244 |
| H | 17.43537815  | 16.05492584  | -11.2877434  |
| H | 16.65331738  | 15.67460301  | -15.52011395 |
| H | 18.18041505  | 19.72945228  | -8.09084754  |
| H | 16.63436219  | 17.63324986  | -7.928915805 |
| H | 17.75941064  | 21.0961848   | -10.25616361 |
| H | 7.932411049  | 28.72438383  | -5.171401041 |
| H | 7.390350661  | 26.40439107  | -4.105306181 |

|   |              |              |              |
|---|--------------|--------------|--------------|
| H | 9.914660525  | 28.60041359  | -6.839696038 |
| H | 8.045415343  | 25.08081959  | 0.800601377  |
| H | 7.331728174  | 23.63562784  | -1.250809493 |
| H | 10.23042776  | 26.40819593  | 0.355032653  |
| H | -4.57947411  | 24.67071142  | 3.909050198  |
| H | -6.58040869  | 23.06860528  | 3.427500285  |
| H | -2.320755136 | 23.70144626  | 3.079161554  |
| H | -10.60656998 | 23.94945325  | 0.845897053  |
| H | -9.829367019 | 21.79215608  | 2.092291303  |
| H | -8.820976187 | 24.81566902  | -0.826069831 |
| H | -20.4803905  | 20.05039916  | 4.501495367  |
| H | -19.25423591 | 18.41701941  | 2.879924176  |
| H | -19.38955458 | 20.10518345  | 6.854712146  |
| H | -21.08646101 | 14.69416751  | 0.451352908  |
| H | -18.66818633 | 15.67466712  | 0.519257059  |
| H | -21.96965492 | 14.0923201   | 2.821448942  |
| H | -25.35559599 | 13.97644377  | 3.616522893  |
| H | -24.73905529 | 11.69964736  | 2.49058045   |
| H | -24.23699342 | 14.25554959  | 5.941499003  |
| H | -24.308974   | -5.537297552 | 2.274389255  |
| H | -22.07564814 | -4.314656164 | 1.722166354  |
| H | -26.17288925 | -3.893550781 | 3.025397028  |
| H | -17.65785608 | -5.089570368 | 3.384516612  |
| H | -18.51844988 | -3.371193168 | 1.61284929   |
| H | -18.97511584 | -4.941466536 | 5.61359388   |
| H | -27.19101802 | 8.728091155  | 7.039759122  |
| H | -25.95080261 | 9.600166804  | 4.919748374  |
| H | -25.74317737 | 7.0728911    | 8.416517464  |
| H | 25.88625898  | 9.934845184  | 4.421641712  |
| H | 23.74108303  | 11.32774535  | 4.934598672  |
| H | 25.88795959  | 8.983725934  | 2.008170089  |

**Table S5. B3PPQ**

| <b>Method</b>   | <b>Time (s)</b> | <b>iterations</b> | <b>E (eV)</b> | <b>f</b>   |
|-----------------|-----------------|-------------------|---------------|------------|
| <b>CIS</b>      | <b>41.9</b>     | <b>16</b>         | <b>4.71</b>   | <b>2.9</b> |
| <b>TD-BLYP</b>  | <b>19.4</b>     | <b>9</b>          | <b>2.81</b>   | <b>0.9</b> |
| <b>TD-B3LYP</b> | <b>50.0</b>     | <b>12</b>         | <b>3.52</b>   | <b>2.3</b> |

|   |              |              |              |
|---|--------------|--------------|--------------|
| C | -12.77207526 | 13.34041215  | -0.212024819 |
| C | -13.04880655 | 12.23470992  | 0.578808032  |
| C | -12.18731502 | 11.1483413   | 0.586092161  |
| C | -11.0335037  | 11.14526547  | -0.198135204 |
| C | -10.76743024 | 12.26285411  | -0.989374689 |
| C | -11.62757525 | 13.35040774  | -0.995970002 |
| C | -10.11009519 | 9.979179266  | -0.190298263 |
| C | -10.59857603 | 8.674982572  | -0.251262096 |
| C | -9.739447807 | 7.589044169  | -0.244053943 |
| C | -8.358076287 | 7.764585107  | -0.176010356 |
| C | -7.869718228 | 9.06908594   | -0.115681056 |
| C | -8.728856997 | 10.15490051  | -0.122454333 |
| C | -7.435578306 | 6.599472942  | -0.167852891 |
| C | -7.713604777 | 5.468429301  | 0.596185201  |
| C | -6.855128334 | 4.381216869  | 0.60038805   |
| C | -5.68632342  | 4.386525217  | -0.156734676 |
| C | -5.401271912 | 5.52246642   | -0.91340173  |
| C | -6.261093193 | 6.604767779  | -0.921900078 |
| C | -4.746803902 | 3.237934977  | -0.169750033 |
| C | -5.159743426 | 1.931836233  | 0.210879058  |
| C | -4.283174851 | 0.885305571  | 0.187252691  |
| C | -2.933213905 | 1.13720096   | -0.216527261 |
| C | -2.611810464 | 2.454115404  | -0.597268646 |
| N | -3.521579275 | 3.46306466   | -0.569481915 |
| C | -1.912409512 | 0.153752691  | -0.230277152 |
| C | -0.634928667 | 0.45146862   | -0.626648836 |
| C | -0.339326392 | 1.782247927  | -1.033678619 |
| C | -1.293442967 | 2.750596625  | -1.014906733 |
| C | -4.753168534 | -0.480672509 | 0.562706877  |
| C | -5.207458372 | -0.73812576  | 1.853503565  |
| C | -5.675667069 | -1.998144993 | 2.199314991  |
| C | -5.698668543 | -3.015399344 | 1.257632431  |
| C | -5.250903204 | -2.767549979 | -0.032844825 |
| C | -4.780203392 | -1.510103418 | -0.377638179 |
| C | 0.432350348  | -0.584195095 | -0.6258365   |
| C | 0.147180224  | -1.907678542 | -1.062841114 |
| C | 1.10307192   | -2.874509437 | -1.043539612 |
| C | 2.412576274  | -2.583419429 | -0.595454624 |
| C | 2.723499941  | -1.273741129 | -0.182541817 |
| C | 1.701166203  | -0.291893943 | -0.198594748 |
| N | 3.323447192  | -3.59134594  | -0.568720615 |

|   |              |              |              |
|---|--------------|--------------|--------------|
| C | 4.539725964  | -3.371854145 | -0.140179124 |
| C | 4.942174656  | -2.072977196 | 0.274635234  |
| C | 4.064097693  | -1.027526189 | 0.253855854  |
| C | 4.523589418  | 0.331083848  | 0.667155626  |
| C | 4.955929505  | 0.559061662  | 1.971241113  |
| C | 5.416413749  | 1.810938369  | 2.354227655  |
| C | 5.45335143   | 2.849916752  | 1.436721207  |
| C | 5.027243294  | 2.631825181  | 0.133811323  |
| C | 4.564121335  | 1.382152248  | -0.248149768 |
| C | 5.481293913  | -4.518800262 | -0.130777476 |
| C | 5.218717597  | -5.636664213 | -0.921744781 |
| C | 6.08134935   | -6.716683763 | -0.933708353 |
| C | 7.236144304  | -6.726843585 | -0.149696851 |
| C | 7.491570804  | -5.613828544 | 0.647781474  |
| C | 6.630110563  | -4.528987986 | 0.656283922  |
| C | 8.162156897  | -7.889084856 | -0.162738816 |
| C | 7.676159651  | -9.195707047 | -0.145196783 |
| C | 8.538679627  | -10.27880825 | -0.155452664 |
| C | 9.920815712  | -10.09832726 | -0.184739569 |
| C | 10.40658803  | -8.79184247  | -0.202840208 |
| C | 9.54425782   | -7.708581737 | -0.191987572 |
| C | 10.84783942  | -11.26150942 | -0.196487458 |
| C | 10.59987341  | -12.3654611  | -1.012460419 |
| C | 11.46362657  | -13.45007434 | -1.022863595 |
| C | 12.59386203  | -13.45098894 | -0.218524076 |
| C | 12.85253808  | -12.35892016 | 0.596981172  |
| C | 11.98720017  | -11.27567274 | 0.60851267   |
| H | -13.43843578 | 14.18137754  | -0.217106323 |
| H | -13.9281162  | 12.22043441  | 1.193975844  |
| H | -12.39966459 | 10.30732237  | 1.217833916  |
| H | -9.896267914 | 12.27186683  | -1.615866389 |
| H | -11.40800798 | 14.19788462  | -1.616727373 |
| H | -11.65548615 | 8.50848497   | -0.332595073 |
| H | -10.14492315 | 6.598575858  | -0.321281998 |
| H | -6.81293257  | 9.236119485  | -0.034773582 |
| H | -8.323863834 | 11.1457016   | -0.047222382 |
| H | -8.591447186 | 5.446150735  | 1.212492593  |
| H | -7.096026527 | 3.543017001  | 1.223819255  |
| H | -4.503488951 | 5.540881444  | -1.495726116 |
| H | -6.029812142 | 7.453528112  | -1.535987629 |
| H | -6.179526204 | 1.752424447  | 0.479002282  |
| H | -2.146516096 | -0.835127639 | 0.107212282  |
| H | 0.651431208  | 2.015926637  | -1.370676613 |
| H | -1.082617647 | 3.757042382  | -1.314946221 |
| H | -5.186278885 | 0.044780786  | 2.587151833  |
| H | -6.017966755 | -2.182290246 | 3.199387451  |
| H | -6.061058058 | -3.989324419 | 1.52431763   |

|   |              |              |              |
|---|--------------|--------------|--------------|
| H | -5.271815648 | -3.548348389 | -0.768514384 |
| H | -4.443660426 | -1.321325947 | -1.379168745 |
| H | -0.836110483 | -2.136967631 | -1.423748664 |
| H | 0.900559663  | -3.875743116 | -1.365890765 |
| H | 1.925959477  | 0.691042648  | 0.161913915  |
| H | 5.956669487  | -1.896449745 | 0.563923104  |
| H | 4.922647353  | -0.240890324 | 2.685809454  |
| H | 5.741494831  | 1.972678021  | 3.363850852  |
| H | 5.809724326  | 3.817775674  | 1.732063858  |
| H | 5.059046736  | 3.429676063  | -0.582929406 |
| H | 4.24492447   | 1.216794255  | -1.259460321 |
| H | 4.335980895  | -5.643094807 | -1.526899869 |
| H | 5.868348114  | -7.551128952 | -1.573472061 |
| H | 8.353995713  | -5.604229016 | 1.285849559  |
| H | 6.85212877   | -3.705461648 | 1.30573744   |
| H | 6.618184904  | -9.36723525  | -0.095585914 |
| H | 8.134548864  | -11.27189796 | -0.112627542 |
| H | 11.46467989  | -8.620824629 | -0.25393398  |
| H | 9.948453384  | -6.715504288 | -0.234310578 |
| H | 9.74052729   | -12.36620588 | -1.655072305 |
| H | 11.25810688  | -14.28715432 | -1.662293902 |
| H | 13.2628798   | -14.28978745 | -0.227079307 |
| H | 13.72066354  | -12.35284264 | 1.227977629  |
| H | 12.18528346  | -10.44602639 | 1.259581119  |

**Table S6. PYP chromophore**

| <b>Method</b>   | <b>Time (s)</b> | <b>iterations</b> | <b>E (eV)</b> | <b>f</b>   |
|-----------------|-----------------|-------------------|---------------|------------|
| <b>CIS</b>      | <b>7.1</b>      | <b>13</b>         | <b>3.75</b>   | <b>1.6</b> |
| <b>TD-BLYP</b>  | <b>4.7</b>      | <b>8</b>          | <b>2.32</b>   | <b>0.0</b> |
| <b>TD-B3LYP</b> | <b>8.7</b>      | <b>9</b>          | <b>2.95</b>   | <b>0.0</b> |

|   |        |        |        |
|---|--------|--------|--------|
| C | 22.967 | 16.81  | 19.507 |
| C | 24.27  | 16.774 | 18.931 |
| C | 24.617 | 15.671 | 18.139 |
| C | 23.681 | 14.66  | 17.949 |
| C | 22.419 | 14.608 | 18.558 |
| C | 22.092 | 15.731 | 19.368 |
| S | 22.3   | 18.226 | 20.373 |
| C | 21.107 | 18.737 | 19.24  |
| C | 19.881 | 18.611 | 19.724 |
| O | 21.503 | 18.978 | 18.056 |
| C | 18.678 | 18.857 | 18.895 |
| C | 17.412 | 18.7   | 19.379 |
| C | 16.267 | 18.768 | 18.424 |
| C | 15.007 | 18.753 | 18.949 |
| C | 14.627 | 18.622 | 20.339 |
| C | 15.744 | 18.498 | 21.241 |
| C | 17.075 | 18.511 | 20.793 |
| O | 13.416 | 18.649 | 20.62  |
| H | 25.016 | 17.532 | 19.156 |
| H | 25.561 | 15.727 | 17.603 |
| H | 23.959 | 13.891 | 17.234 |
| H | 21.774 | 13.742 | 18.433 |
| H | 21.138 | 15.665 | 19.885 |
| H | 19.762 | 18.159 | 20.708 |
| H | 18.901 | 19.227 | 17.895 |
| H | 16.528 | 18.974 | 17.391 |
| H | 14.139 | 18.825 | 18.303 |
| H | 15.6   | 18.345 | 22.305 |
| H | 17.886 | 18.502 | 21.514 |

**Table S7. PYP chromophore + 14 waters**

| <b>Method</b>   | <b>Time(s)</b> | <b>iterations</b> | <b>E(eV)</b> | <b>f</b>   |
|-----------------|----------------|-------------------|--------------|------------|
| <b>CIS</b>      | <b>13.7</b>    | <b>12</b>         | <b>3.70</b>  | <b>1.6</b> |
| <b>TD-BLYP</b>  | <b>9.1</b>     | <b>6</b>          | <b>2.15</b>  | <b>0.0</b> |
| <b>TD-B3LYP</b> | <b>19.7</b>    | <b>9</b>          | <b>2.90</b>  | <b>0.1</b> |

|   |        |        |        |
|---|--------|--------|--------|
| C | 22.967 | 16.81  | 19.507 |
| C | 24.27  | 16.774 | 18.931 |
| C | 24.617 | 15.671 | 18.139 |
| C | 23.681 | 14.66  | 17.949 |
| C | 22.419 | 14.608 | 18.558 |
| C | 22.092 | 15.731 | 19.368 |
| S | 22.3   | 18.226 | 20.373 |
| C | 21.107 | 18.737 | 19.24  |
| C | 19.881 | 18.611 | 19.724 |
| O | 21.503 | 18.978 | 18.056 |
| C | 18.678 | 18.857 | 18.895 |
| C | 17.412 | 18.7   | 19.379 |
| C | 16.267 | 18.768 | 18.424 |
| C | 15.007 | 18.753 | 18.949 |
| C | 14.627 | 18.622 | 20.339 |
| C | 15.744 | 18.498 | 21.241 |
| C | 17.075 | 18.511 | 20.793 |
| O | 13.416 | 18.649 | 20.62  |
| H | 25.016 | 17.532 | 19.156 |
| H | 25.561 | 15.727 | 17.603 |
| H | 23.959 | 13.891 | 17.234 |
| H | 21.774 | 13.742 | 18.433 |
| H | 21.138 | 15.665 | 19.885 |
| H | 19.762 | 18.159 | 20.708 |
| H | 18.901 | 19.227 | 17.895 |
| H | 16.528 | 18.974 | 17.391 |
| H | 14.139 | 18.825 | 18.303 |
| H | 15.6   | 18.345 | 22.305 |
| H | 17.886 | 18.502 | 21.514 |
| O | 21.624 | 17.545 | 15.698 |
| H | 21.844 | 17.862 | 16.574 |
| H | 21.068 | 18.23  | 15.328 |
| O | 24.737 | 20.209 | 19.019 |
| H | 24.671 | 20.885 | 18.345 |
| H | 23.926 | 19.706 | 18.934 |
| O | 27.561 | 17.119 | 16.412 |
| H | 27.549 | 17.874 | 15.824 |
| H | 28.209 | 16.527 | 16.028 |
| O | 16.841 | 21.428 | 19.485 |
| H | 17.664 | 21.307 | 19.96  |
| H | 16.432 | 20.562 | 19.491 |

|   |        |        |        |
|---|--------|--------|--------|
| O | 12.496 | 18.392 | 23.093 |
| H | 12.583 | 19.222 | 23.562 |
| H | 12.739 | 18.6   | 22.191 |
| O | 11.386 | 16.902 | 19.667 |
| H | 10.675 | 17.357 | 19.216 |
| H | 11.773 | 17.567 | 20.236 |
| O | 15.712 | 18.646 | 24.882 |
| H | 16.604 | 18.442 | 24.598 |
| H | 15.821 | 19.333 | 25.539 |
| O | 13.277 | 19.405 | 15.875 |
| H | 13.618 | 19.224 | 14.999 |
| H | 13.859 | 20.078 | 16.225 |
| O | 16.783 | 20.269 | 14.756 |
| H | 16.29  | 20.474 | 15.55  |
| H | 16.349 | 19.496 | 14.397 |
| O | 15.072 | 21.246 | 16.941 |
| H | 15.033 | 21.149 | 17.893 |
| H | 15.506 | 22.088 | 16.804 |
| O | 27.736 | 17.219 | 19.315 |
| H | 27.382 | 17.243 | 18.426 |
| H | 27.865 | 16.288 | 19.496 |
| O | 21.31  | 21.552 | 17.118 |
| H | 20.371 | 21.738 | 17.095 |
| H | 21.367 | 20.637 | 17.392 |
| O | 20.386 | 16.855 | 22.874 |
| H | 19.688 | 16.2   | 22.901 |
| H | 21.169 | 16.361 | 22.63  |
| O | 18.636 | 14.472 | 19.061 |
| H | 19.069 | 13.674 | 19.365 |
| H | 18.005 | 14.68  | 19.751 |



**Table S8. PYP chromophore + 40 waters**

| <b>Method</b>   | <b>Time(s)</b> | <b>iterations</b> | <b>E(eV)</b> | <b>f</b>   |
|-----------------|----------------|-------------------|--------------|------------|
| <b>CIS</b>      | <b>38.2</b>    | <b>12</b>         | <b>3.67</b>  | <b>1.5</b> |
| <b>TD-BLYP</b>  | <b>19.3</b>    | <b>5</b>          | <b>0.83</b>  | <b>0.0</b> |
| <b>TD-B3LYP</b> | <b>54.6</b>    | <b>11</b>         | <b>2.52</b>  | <b>0.0</b> |

|   |        |        |        |
|---|--------|--------|--------|
| C | 22.967 | 16.81  | 19.507 |
| C | 24.27  | 16.774 | 18.931 |
| C | 24.617 | 15.671 | 18.139 |
| C | 23.681 | 14.66  | 17.949 |
| C | 22.419 | 14.608 | 18.558 |
| C | 22.092 | 15.731 | 19.368 |
| S | 22.3   | 18.226 | 20.373 |
| C | 21.107 | 18.737 | 19.24  |
| C | 19.881 | 18.611 | 19.724 |
| O | 21.503 | 18.978 | 18.056 |
| C | 18.678 | 18.857 | 18.895 |
| C | 17.412 | 18.7   | 19.379 |
| C | 16.267 | 18.768 | 18.424 |
| C | 15.007 | 18.753 | 18.949 |
| C | 14.627 | 18.622 | 20.339 |
| C | 15.744 | 18.498 | 21.241 |
| C | 17.075 | 18.511 | 20.793 |
| O | 13.416 | 18.649 | 20.62  |
| H | 25.016 | 17.532 | 19.156 |
| H | 25.561 | 15.727 | 17.603 |
| H | 23.959 | 13.891 | 17.234 |
| H | 21.774 | 13.742 | 18.433 |
| H | 21.138 | 15.665 | 19.885 |
| H | 19.762 | 18.159 | 20.708 |
| H | 18.901 | 19.227 | 17.895 |
| H | 16.528 | 18.974 | 17.391 |
| H | 14.139 | 18.825 | 18.303 |
| H | 15.6   | 18.345 | 22.305 |
| H | 17.886 | 18.502 | 21.514 |
| O | 26.315 | 12.269 | 19.428 |
| H | 25.586 | 12.142 | 20.035 |
| H | 26.005 | 11.901 | 18.601 |
| O | 21.624 | 17.545 | 15.698 |
| H | 21.844 | 17.862 | 16.574 |
| H | 21.068 | 18.23  | 15.328 |
| O | 27.301 | 20.143 | 19.909 |
| H | 26.457 | 20.142 | 19.458 |
| H | 27.68  | 19.287 | 19.713 |
| O | 24.737 | 20.209 | 19.019 |
| H | 24.671 | 20.885 | 18.345 |
| H | 23.926 | 19.706 | 18.934 |

|   |        |        |        |
|---|--------|--------|--------|
| O | 24.407 | 14.872 | 14.057 |
| H | 23.679 | 14.548 | 14.587 |
| H | 24.691 | 15.67  | 14.502 |
| O | 27.84  | 14.376 | 19.85  |
| H | 27.952 | 14.292 | 20.797 |
| H | 27.401 | 13.566 | 19.588 |
| O | 27.561 | 17.119 | 16.412 |
| H | 27.549 | 17.874 | 15.824 |
| H | 28.209 | 16.527 | 16.028 |
| O | 25.055 | 10.896 | 15.923 |
| H | 24.361 | 10.877 | 15.264 |
| H | 25.56  | 10.099 | 15.762 |
| O | 16.841 | 21.428 | 19.485 |
| H | 17.664 | 21.307 | 19.96  |
| H | 16.432 | 20.562 | 19.491 |
| O | 12.496 | 18.392 | 23.093 |
| H | 12.583 | 19.222 | 23.562 |
| H | 12.739 | 18.6   | 22.191 |
| O | 19.394 | 15.833 | 16.886 |
| H | 20.083 | 16.332 | 17.326 |
| H | 18.978 | 15.332 | 17.587 |
| O | 17.468 | 17.185 | 14.984 |
| H | 17.92  | 16.542 | 15.53  |
| H | 16.609 | 17.286 | 15.394 |
| O | 14.403 | 16.848 | 15.969 |
| H | 13.948 | 17.67  | 16.154 |
| H | 14.21  | 16.292 | 16.723 |
| O | 18.731 | 22.555 | 17.426 |
| H | 17.984 | 22.738 | 16.856 |
| H | 18.404 | 22.718 | 18.31  |
| O | 21.335 | 19.709 | 23.292 |
| H | 20.775 | 20.422 | 23.599 |
| H | 20.725 | 19.007 | 23.064 |
| O | 11.386 | 16.902 | 19.667 |
| H | 10.675 | 17.357 | 19.216 |
| H | 11.773 | 17.567 | 20.236 |
| O | 15.712 | 18.646 | 24.882 |
| H | 16.604 | 18.442 | 24.598 |
| H | 15.821 | 19.333 | 25.539 |
| O | 13.242 | 15.061 | 18.782 |
| H | 12.414 | 14.723 | 18.441 |
| H | 13.003 | 15.872 | 19.231 |
| O | 13.277 | 19.405 | 15.875 |
| H | 13.618 | 19.224 | 14.999 |
| H | 13.859 | 20.078 | 16.225 |
| O | 24.223 | 17.423 | 14.731 |
| H | 23.553 | 17.297 | 15.402 |

|   |        |        |        |
|---|--------|--------|--------|
| H | 24.473 | 18.344 | 14.812 |
| O | 19.662 | 19.241 | 14.753 |
| H | 19.241 | 19.991 | 14.332 |
| H | 18.958 | 18.601 | 14.862 |
| O | 22.74  | 15.438 | 22.947 |
| H | 23.517 | 15.344 | 22.397 |
| H | 22.671 | 14.602 | 23.409 |
| O | 16.783 | 20.269 | 14.756 |
| H | 16.29  | 20.474 | 15.55  |
| H | 16.349 | 19.496 | 14.397 |
| O | 20.451 | 13.255 | 15.701 |
| H | 20.65  | 13.928 | 16.352 |
| H | 20.389 | 12.444 | 16.206 |
| O | 16.501 | 15.419 | 20.562 |
| H | 16.026 | 15.502 | 21.388 |
| H | 16.832 | 16.3   | 20.386 |
| O | 24.968 | 14.88  | 21.457 |
| H | 25.063 | 13.947 | 21.268 |
| H | 24.656 | 15.261 | 20.636 |
| O | 15.072 | 21.246 | 16.941 |
| H | 15.033 | 21.149 | 17.893 |
| H | 15.506 | 22.088 | 16.804 |
| O | 11.65  | 21.466 | 19.131 |
| H | 12.012 | 20.691 | 18.703 |
| H | 11.042 | 21.833 | 18.489 |
| O | 14.927 | 15.308 | 22.925 |
| H | 14.754 | 14.585 | 23.528 |
| H | 14.552 | 16.075 | 23.358 |
| O | 27.736 | 17.219 | 19.315 |
| H | 27.382 | 17.243 | 18.426 |
| H | 27.865 | 16.288 | 19.496 |
| O | 21.31  | 21.552 | 17.118 |
| H | 20.371 | 21.738 | 17.095 |
| H | 21.367 | 20.637 | 17.392 |
| O | 20.386 | 16.855 | 22.874 |
| H | 19.688 | 16.2   | 22.901 |
| H | 21.169 | 16.361 | 22.63  |
| O | 27.268 | 12.771 | 15.442 |
| H | 26.34  | 12.54  | 15.396 |
| H | 27.646 | 12.406 | 14.643 |
| O | 18.629 | 18.047 | 24.495 |
| H | 19.425 | 17.798 | 24.027 |
| H | 18.252 | 17.217 | 24.786 |
| O | 19.091 | 21.702 | 21.61  |
| H | 19.893 | 21.913 | 21.132 |
| H | 19.386 | 21.511 | 22.501 |
| O | 24.222 | 10.565 | 18.262 |

|   |        |        |        |
|---|--------|--------|--------|
| H | 24.868 | 9.939  | 18.589 |
| H | 24.551 | 10.82  | 17.4   |
| O | 19.672 | 12.13  | 20.083 |
| H | 18.909 | 11.736 | 19.661 |
| H | 19.929 | 11.496 | 20.753 |
| O | 20.735 | 10.817 | 17.859 |
| H | 21.253 | 10.076 | 18.174 |
| H | 20.533 | 11.319 | 18.649 |
| O | 18.636 | 14.472 | 19.061 |
| H | 19.069 | 13.674 | 19.365 |
| H | 18.005 | 14.68  | 19.751 |
| O | 13.184 | 21.666 | 21.343 |
| H | 13.397 | 20.762 | 21.574 |
| H | 12.751 | 21.6   | 20.492 |

**Table S9. PYP chromophore + 63 waters**

| <b>Method</b>   | <b>Time(s)</b> | <b>iterations</b> | <b>E(eV)</b> | <b>f</b>   |
|-----------------|----------------|-------------------|--------------|------------|
| <b>CIS</b>      | <b>71.9</b>    | <b>12</b>         | <b>3.66</b>  | <b>1.6</b> |
| <b>TD-BLYP</b>  | <b>32.1</b>    | <b>6</b>          | <b>0.73</b>  | <b>0.0</b> |
| <b>TD-B3LYP</b> | <b>83.2</b>    | <b>9</b>          | <b>2.40</b>  | <b>0.0</b> |

|   |        |        |        |
|---|--------|--------|--------|
| C | 22.967 | 16.81  | 19.507 |
| C | 24.27  | 16.774 | 18.931 |
| C | 24.617 | 15.671 | 18.139 |
| C | 23.681 | 14.66  | 17.949 |
| C | 22.419 | 14.608 | 18.558 |
| C | 22.092 | 15.731 | 19.368 |
| S | 22.3   | 18.226 | 20.373 |
| C | 21.107 | 18.737 | 19.24  |
| C | 19.881 | 18.611 | 19.724 |
| O | 21.503 | 18.978 | 18.056 |
| C | 18.678 | 18.857 | 18.895 |
| C | 17.412 | 18.7   | 19.379 |
| C | 16.267 | 18.768 | 18.424 |
| C | 15.007 | 18.753 | 18.949 |
| C | 14.627 | 18.622 | 20.339 |
| C | 15.744 | 18.498 | 21.241 |
| C | 17.075 | 18.511 | 20.793 |
| O | 13.416 | 18.649 | 20.62  |
| H | 25.016 | 17.532 | 19.156 |
| H | 25.561 | 15.727 | 17.603 |
| H | 23.959 | 13.891 | 17.234 |
| H | 21.774 | 13.742 | 18.433 |
| H | 21.138 | 15.665 | 19.885 |
| H | 19.762 | 18.159 | 20.708 |
| H | 18.901 | 19.227 | 17.895 |
| H | 16.528 | 18.974 | 17.391 |
| H | 14.139 | 18.825 | 18.303 |
| H | 15.6   | 18.345 | 22.305 |
| H | 17.886 | 18.502 | 21.514 |
| O | 26.315 | 12.269 | 19.428 |
| H | 25.586 | 12.142 | 20.035 |
| H | 26.005 | 11.901 | 18.601 |
| O | 21.624 | 17.545 | 15.698 |
| H | 21.844 | 17.862 | 16.574 |
| H | 21.068 | 18.23  | 15.328 |
| O | 27.301 | 20.143 | 19.909 |
| H | 26.457 | 20.142 | 19.458 |
| H | 27.68  | 19.287 | 19.713 |
| O | 24.737 | 20.209 | 19.019 |
| H | 24.671 | 20.885 | 18.345 |
| H | 23.926 | 19.706 | 18.934 |

|   |        |        |        |
|---|--------|--------|--------|
| O | 24.407 | 14.872 | 14.057 |
| H | 23.679 | 14.548 | 14.587 |
| H | 24.691 | 15.67  | 14.502 |
| O | 27.84  | 14.376 | 19.85  |
| H | 27.952 | 14.292 | 20.797 |
| H | 27.401 | 13.566 | 19.588 |
| O | 29.304 | 15.125 | 15.496 |
| H | 29.712 | 15.071 | 16.36  |
| H | 28.974 | 14.241 | 15.332 |
| O | 24.198 | 19.84  | 23.687 |
| H | 24.475 | 20.696 | 23.361 |
| H | 23.265 | 19.795 | 23.477 |
| O | 27.561 | 17.119 | 16.412 |
| H | 27.549 | 17.874 | 15.824 |
| H | 28.209 | 16.527 | 16.028 |
| O | 25.055 | 10.896 | 15.923 |
| H | 24.361 | 10.877 | 15.264 |
| H | 25.56  | 10.099 | 15.762 |
| O | 13.129 | 20.587 | 24.819 |
| H | 14.035 | 20.781 | 25.059 |
| H | 12.692 | 21.438 | 24.822 |
| O | 16.841 | 21.428 | 19.485 |
| H | 17.664 | 21.307 | 19.96  |
| H | 16.432 | 20.562 | 19.491 |
| O | 12.756 | 16.479 | 24.912 |
| H | 13.482 | 16.7   | 25.496 |
| H | 12.671 | 17.239 | 24.337 |
| O | 12.496 | 18.392 | 23.093 |
| H | 12.583 | 19.222 | 23.562 |
| H | 12.739 | 18.6   | 22.191 |
| O | 19.394 | 15.833 | 16.886 |
| H | 20.083 | 16.332 | 17.326 |
| H | 18.978 | 15.332 | 17.587 |
| O | 23.37  | 10.671 | 13.931 |
| H | 22.71  | 9.994  | 14.082 |
| H | 22.878 | 11.41  | 13.574 |
| O | 17.468 | 17.185 | 14.984 |
| H | 17.92  | 16.542 | 15.53  |
| H | 16.609 | 17.286 | 15.394 |
| O | 14.403 | 16.848 | 15.969 |
| H | 13.948 | 17.67  | 16.154 |
| H | 14.21  | 16.292 | 16.723 |
| O | 25.06  | 21.993 | 21.145 |
| H | 25.996 | 22.109 | 20.98  |
| H | 24.83  | 21.197 | 20.666 |
| O | 17.57  | 13.249 | 16.234 |
| H | 18.437 | 13.654 | 16.246 |

|   |        |        |        |
|---|--------|--------|--------|
| H | 17.195 | 13.459 | 17.089 |
| O | 21.627 | 12.663 | 13.231 |
| H | 21.25  | 12.924 | 14.071 |
| H | 21.47  | 13.412 | 12.655 |
| O | 17.755 | 15.73  | 25.649 |
| H | 18.607 | 15.4   | 25.932 |
| H | 17.126 | 15.092 | 25.988 |
| O | 18.731 | 22.555 | 17.426 |
| H | 17.984 | 22.738 | 16.856 |
| H | 18.404 | 22.718 | 18.31  |
| O | 21.335 | 19.709 | 23.292 |
| H | 20.775 | 20.422 | 23.599 |
| H | 20.725 | 19.007 | 23.064 |
| O | 11.386 | 16.902 | 19.667 |
| H | 10.675 | 17.357 | 19.216 |
| H | 11.773 | 17.567 | 20.236 |
| O | 15.712 | 18.646 | 24.882 |
| H | 16.604 | 18.442 | 24.598 |
| H | 15.821 | 19.333 | 25.539 |
| O | 24.681 | 20.073 | 14.961 |
| H | 23.846 | 20.534 | 15.05  |
| H | 25.116 | 20.506 | 14.227 |
| O | 15.03  | 16.584 | 26.547 |
| H | 15.496 | 17.223 | 26.006 |
| H | 14.873 | 17.039 | 27.374 |
| O | 13.242 | 15.061 | 18.782 |
| H | 12.414 | 14.723 | 18.441 |
| H | 13.003 | 15.872 | 19.231 |
| O | 14.272 | 18.25  | 13.393 |
| H | 14.767 | 17.467 | 13.154 |
| H | 13.532 | 18.261 | 12.786 |
| O | 13.277 | 19.405 | 15.875 |
| H | 13.618 | 19.224 | 14.999 |
| H | 13.859 | 20.078 | 16.225 |
| O | 15.771 | 14.127 | 18.118 |
| H | 16.154 | 14.342 | 18.969 |
| H | 14.88  | 14.475 | 18.163 |
| O | 24.223 | 17.423 | 14.731 |
| H | 23.553 | 17.297 | 15.402 |
| H | 24.473 | 18.344 | 14.812 |
| O | 19.662 | 19.241 | 14.753 |
| H | 19.241 | 19.991 | 14.332 |
| H | 18.958 | 18.601 | 14.862 |
| O | 22.74  | 15.438 | 22.947 |
| H | 23.517 | 15.344 | 22.397 |
| H | 22.671 | 14.602 | 23.409 |
| O | 16.783 | 20.269 | 14.756 |

|   |        |        |        |
|---|--------|--------|--------|
| H | 16.29  | 20.474 | 15.55  |
| H | 16.349 | 19.496 | 14.397 |
| O | 20.451 | 13.255 | 15.701 |
| H | 20.65  | 13.928 | 16.352 |
| H | 20.389 | 12.444 | 16.206 |
| O | 16.501 | 15.419 | 20.562 |
| H | 16.026 | 15.502 | 21.388 |
| H | 16.832 | 16.3   | 20.386 |
| O | 24.968 | 14.88  | 21.457 |
| H | 25.063 | 13.947 | 21.268 |
| H | 24.656 | 15.261 | 20.636 |
| O | 9.428  | 18.475 | 18.235 |
| H | 8.496  | 18.538 | 18.445 |
| H | 9.453  | 18.386 | 17.282 |
| O | 9.908  | 17.41  | 23.452 |
| H | 10.793 | 17.759 | 23.344 |
| H | 9.347  | 18.185 | 23.484 |
| O | 15.072 | 21.246 | 16.941 |
| H | 15.033 | 21.149 | 17.893 |
| H | 15.506 | 22.088 | 16.804 |
| O | 16.921 | 23.022 | 22.968 |
| H | 16.499 | 23.164 | 22.121 |
| H | 17.771 | 22.638 | 22.751 |
| O | 11.65  | 21.466 | 19.131 |
| H | 12.012 | 20.691 | 18.703 |
| H | 11.042 | 21.833 | 18.489 |
| O | 25.465 | 16.898 | 23.713 |
| H | 25.257 | 16.216 | 23.076 |
| H | 24.796 | 17.568 | 23.574 |
| O | 14.927 | 15.308 | 22.925 |
| H | 14.754 | 14.585 | 23.528 |
| H | 14.552 | 16.075 | 23.358 |
| O | 27.736 | 17.219 | 19.315 |
| H | 27.382 | 17.243 | 18.426 |
| H | 27.865 | 16.288 | 19.496 |
| O | 21.31  | 21.552 | 17.118 |
| H | 20.371 | 21.738 | 17.095 |
| H | 21.367 | 20.637 | 17.392 |
| O | 20.386 | 16.855 | 22.874 |
| H | 19.688 | 16.2   | 22.901 |
| H | 21.169 | 16.361 | 22.63  |
| O | 27.268 | 12.771 | 15.442 |
| H | 26.34  | 12.54  | 15.396 |
| H | 27.646 | 12.406 | 14.643 |
| O | 15.15  | 23.322 | 20.352 |
| H | 15.685 | 22.545 | 20.191 |
| H | 14.359 | 22.986 | 20.773 |



|   |        |        |        |
|---|--------|--------|--------|
| O | 18.279 | 15.065 | 22.961 |
| H | 17.794 | 15.164 | 23.781 |
| H | 17.829 | 14.357 | 22.501 |
| O | 18.629 | 18.047 | 24.495 |
| H | 19.425 | 17.798 | 24.027 |
| H | 18.252 | 17.217 | 24.786 |
| O | 19.091 | 21.702 | 21.61  |
| H | 19.893 | 21.913 | 21.132 |
| H | 19.386 | 21.511 | 22.501 |
| O | 21.055 | 15.483 | 13.922 |
| H | 20.52  | 14.923 | 14.484 |
| H | 21.497 | 16.077 | 14.529 |
| O | 24.222 | 10.565 | 18.262 |
| H | 24.868 | 9.939  | 18.589 |
| H | 24.551 | 10.82  | 17.4   |
| O | 19.672 | 12.13  | 20.083 |
| H | 18.909 | 11.736 | 19.661 |
| H | 19.929 | 11.496 | 20.753 |
| O | 20.735 | 10.817 | 17.859 |
| H | 21.253 | 10.076 | 18.174 |
| H | 20.533 | 11.319 | 18.649 |
| O | 18.636 | 14.472 | 19.061 |
| H | 19.069 | 13.674 | 19.365 |
| H | 18.005 | 14.68  | 19.751 |
| O | 10.889 | 20.232 | 15.06  |
| H | 10.994 | 20.785 | 14.286 |
| H | 11.766 | 20.18  | 15.439 |
| O | 15.493 | 21.324 | 26.146 |
| H | 15.28  | 22.159 | 25.728 |
| H | 15.233 | 21.441 | 27.059 |
| O | 13.184 | 21.666 | 21.343 |
| H | 13.397 | 20.762 | 21.574 |
| H | 12.751 | 21.6   | 20.492 |
| O | 10.827 | 15.006 | 21.802 |
| H | 11.27  | 15.512 | 21.121 |
| H | 10.502 | 15.664 | 22.417 |

**Table S10. PYP chromophore + 101 waters**

| <b>Method</b>   | <b>Time(s)</b> | <b>iterations</b> | <b>E(eV)</b> | <b>f</b>   |
|-----------------|----------------|-------------------|--------------|------------|
| <b>CIS</b>      | <b>133.2</b>   | <b>12</b>         | <b>3.64</b>  | <b>1.6</b> |
| <b>TD-BLYP</b>  | <b>54.8</b>    | <b>7</b>          | <b>0.08</b>  | <b>0.0</b> |
| <b>TD-B3LYP</b> | <b>111.9</b>   | <b>6</b>          | <b>1.65</b>  | <b>0.0</b> |

|   |        |        |        |
|---|--------|--------|--------|
| C | 22.967 | 16.81  | 19.507 |
| C | 24.27  | 16.774 | 18.931 |
| C | 24.617 | 15.671 | 18.139 |
| C | 23.681 | 14.66  | 17.949 |
| C | 22.419 | 14.608 | 18.558 |
| C | 22.092 | 15.731 | 19.368 |
| S | 22.3   | 18.226 | 20.373 |
| C | 21.107 | 18.737 | 19.24  |
| C | 19.881 | 18.611 | 19.724 |
| O | 21.503 | 18.978 | 18.056 |
| C | 18.678 | 18.857 | 18.895 |
| C | 17.412 | 18.7   | 19.379 |
| C | 16.267 | 18.768 | 18.424 |
| C | 15.007 | 18.753 | 18.949 |
| C | 14.627 | 18.622 | 20.339 |
| C | 15.744 | 18.498 | 21.241 |
| C | 17.075 | 18.511 | 20.793 |
| O | 13.416 | 18.649 | 20.62  |
| H | 25.016 | 17.532 | 19.156 |
| H | 25.561 | 15.727 | 17.603 |
| H | 23.959 | 13.891 | 17.234 |
| H | 21.774 | 13.742 | 18.433 |
| H | 21.138 | 15.665 | 19.885 |
| H | 19.762 | 18.159 | 20.708 |
| H | 18.901 | 19.227 | 17.895 |
| H | 16.528 | 18.974 | 17.391 |
| H | 14.139 | 18.825 | 18.303 |
| H | 15.6   | 18.345 | 22.305 |
| H | 17.886 | 18.502 | 21.514 |
| O | 24.938 | 16.847 | 11.925 |
| H | 24.601 | 17.235 | 12.732 |
| H | 25.689 | 16.325 | 12.206 |
| O | 26.315 | 12.269 | 19.428 |
| H | 25.586 | 12.142 | 20.035 |
| H | 26.005 | 11.901 | 18.601 |
| O | 30.751 | 18.966 | 19.536 |
| H | 30.85  | 19.768 | 19.022 |
| H | 29.824 | 18.742 | 19.454 |
| O | 21.624 | 17.545 | 15.698 |
| H | 21.844 | 17.862 | 16.574 |
| H | 21.068 | 18.23  | 15.328 |

|   |        |        |        |
|---|--------|--------|--------|
| O | 27.301 | 20.143 | 19.909 |
| H | 26.457 | 20.142 | 19.458 |
| H | 27.68  | 19.287 | 19.713 |
| O | 28.345 | 21.116 | 22.423 |
| H | 29.083 | 21.585 | 22.033 |
| H | 27.883 | 20.733 | 21.678 |
| O | 24.737 | 20.209 | 19.019 |
| H | 24.671 | 20.885 | 18.345 |
| H | 23.926 | 19.706 | 18.934 |
| O | 24.407 | 14.872 | 14.057 |
| H | 23.679 | 14.548 | 14.587 |
| H | 24.691 | 15.67  | 14.502 |
| O | 27.84  | 14.376 | 19.85  |
| H | 27.952 | 14.292 | 20.797 |
| H | 27.401 | 13.566 | 19.588 |
| O | 29.304 | 15.125 | 15.496 |
| H | 29.712 | 15.071 | 16.36  |
| H | 28.974 | 14.241 | 15.332 |
| O | 27.648 | 21.192 | 16.796 |
| H | 27.35  | 20.499 | 16.206 |
| H | 26.861 | 21.705 | 16.979 |
| O | 24.198 | 19.84  | 23.687 |
| H | 24.475 | 20.696 | 23.361 |
| H | 23.265 | 19.795 | 23.477 |
| O | 27.561 | 17.119 | 16.412 |
| H | 27.549 | 17.874 | 15.824 |
| H | 28.209 | 16.527 | 16.028 |
| O | 25.055 | 10.896 | 15.923 |
| H | 24.361 | 10.877 | 15.264 |
| H | 25.56  | 10.099 | 15.762 |
| O | 27.663 | 15.508 | 12.777 |
| H | 28.527 | 15.453 | 12.369 |
| H | 27.845 | 15.681 | 13.701 |
| O | 26.642 | 8.919  | 16.155 |
| H | 27.111 | 8.832  | 15.325 |
| H | 27.2   | 8.476  | 16.794 |
| O | 28.184 | 19.383 | 14.719 |
| H | 27.476 | 19.592 | 14.11  |
| H | 28.984 | 19.585 | 14.233 |
| O | 13.129 | 20.587 | 24.819 |
| H | 14.035 | 20.781 | 25.059 |
| H | 12.692 | 21.438 | 24.822 |
| O | 16.841 | 21.428 | 19.485 |
| H | 17.664 | 21.307 | 19.96  |
| H | 16.432 | 20.562 | 19.491 |
| O | 10.628 | 21.988 | 23.73  |
| H | 11.119 | 22.808 | 23.678 |

|   |        |        |        |
|---|--------|--------|--------|
| H | 10.072 | 21.992 | 22.95  |
| O | 12.756 | 16.479 | 24.912 |
| H | 13.482 | 16.7   | 25.496 |
| H | 12.671 | 17.239 | 24.337 |
| O | 23.729 | 23.294 | 23.224 |
| H | 24.058 | 24.189 | 23.134 |
| H | 24.062 | 22.838 | 22.451 |
| O | 19.811 | 22.199 | 24.228 |
| H | 20.647 | 22.43  | 24.631 |
| H | 19.187 | 22.198 | 24.953 |
| O | 22.458 | 17.144 | 25.325 |
| H | 22.54  | 16.622 | 24.528 |
| H | 23.125 | 17.825 | 25.235 |
| O | 12.496 | 18.392 | 23.093 |
| H | 12.583 | 19.222 | 23.562 |
| H | 12.739 | 18.6   | 22.191 |
| O | 19.394 | 15.833 | 16.886 |
| H | 20.083 | 16.332 | 17.326 |
| H | 18.978 | 15.332 | 17.587 |
| O | 23.37  | 10.671 | 13.931 |
| H | 22.71  | 9.994  | 14.082 |
| H | 22.878 | 11.41  | 13.574 |
| O | 15.044 | 14.239 | 14.849 |
| H | 14.889 | 15.184 | 14.839 |
| H | 15.803 | 14.127 | 15.421 |
| O | 17.468 | 17.185 | 14.984 |
| H | 17.92  | 16.542 | 15.53  |
| H | 16.609 | 17.286 | 15.394 |
| O | 14.403 | 16.848 | 15.969 |
| H | 13.948 | 17.67  | 16.154 |
| H | 14.21  | 16.292 | 16.723 |
| O | 25.06  | 21.993 | 21.145 |
| H | 25.996 | 22.109 | 20.98  |
| H | 24.83  | 21.197 | 20.666 |
| O | 17.57  | 13.249 | 16.234 |
| H | 18.437 | 13.654 | 16.246 |
| H | 17.195 | 13.459 | 17.089 |
| O | 21.627 | 12.663 | 13.231 |
| H | 21.25  | 12.924 | 14.071 |
| H | 21.47  | 13.412 | 12.655 |
| O | 17.755 | 15.73  | 25.649 |
| H | 18.607 | 15.4   | 25.932 |
| H | 17.126 | 15.092 | 25.988 |
| O | 18.731 | 22.555 | 17.426 |
| H | 17.984 | 22.738 | 16.856 |
| H | 18.404 | 22.718 | 18.31  |
| O | 14.368 | 13.467 | 21.096 |

|   |        |        |        |
|---|--------|--------|--------|
| H | 14.669 | 14.215 | 21.613 |
| H | 14.139 | 13.841 | 20.245 |
| O | 22.909 | 23.677 | 16.692 |
| H | 22.302 | 24.379 | 16.929 |
| H | 22.394 | 22.875 | 16.78  |
| O | 8.898  | 18.427 | 15.597 |
| H | 9.56   | 19.004 | 15.215 |
| H | 8.079  | 18.693 | 15.179 |
| O | 21.335 | 19.709 | 23.292 |
| H | 20.775 | 20.422 | 23.599 |
| H | 20.725 | 19.007 | 23.064 |
| O | 11.386 | 16.902 | 19.667 |
| H | 10.675 | 17.357 | 19.216 |
| H | 11.773 | 17.567 | 20.236 |
| O | 15.712 | 18.646 | 24.882 |
| H | 16.604 | 18.442 | 24.598 |
| H | 15.821 | 19.333 | 25.539 |
| O | 24.681 | 20.073 | 14.961 |
| H | 23.846 | 20.534 | 15.05  |
| H | 25.116 | 20.506 | 14.227 |
| O | 15.03  | 16.584 | 26.547 |
| H | 15.496 | 17.223 | 26.006 |
| H | 14.873 | 17.039 | 27.374 |
| O | 13.242 | 15.061 | 18.782 |
| H | 12.414 | 14.723 | 18.441 |
| H | 13.003 | 15.872 | 19.231 |
| O | 14.272 | 18.25  | 13.393 |
| H | 14.767 | 17.467 | 13.154 |
| H | 13.532 | 18.261 | 12.786 |
| O | 13.277 | 19.405 | 15.875 |
| H | 13.618 | 19.224 | 14.999 |
| H | 13.859 | 20.078 | 16.225 |
| O | 15.771 | 14.127 | 18.118 |
| H | 16.154 | 14.342 | 18.969 |
| H | 14.88  | 14.475 | 18.163 |
| O | 14.25  | 22.462 | 13.34  |
| H | 14.147 | 22.425 | 12.389 |
| H | 15.019 | 23.016 | 13.476 |
| O | 22.076 | 9.108  | 15.841 |
| H | 22.533 | 9.041  | 16.68  |
| H | 21.422 | 9.793  | 15.978 |
| O | 24.223 | 17.423 | 14.731 |
| H | 23.553 | 17.297 | 15.402 |
| H | 24.473 | 18.344 | 14.812 |
| O | 19.662 | 19.241 | 14.753 |
| H | 19.241 | 19.991 | 14.332 |
| H | 18.958 | 18.601 | 14.862 |

|   |        |        |        |
|---|--------|--------|--------|
| O | 22.74  | 15.438 | 22.947 |
| H | 23.517 | 15.344 | 22.397 |
| H | 22.671 | 14.602 | 23.409 |
| O | 16.339 | 23.922 | 16.134 |
| H | 16.628 | 24.337 | 15.322 |
| H | 15.499 | 24.337 | 16.33  |
| O | 16.783 | 20.269 | 14.756 |
| H | 16.29  | 20.474 | 15.55  |
| H | 16.349 | 19.496 | 14.397 |
| O | 20.451 | 13.255 | 15.701 |
| H | 20.65  | 13.928 | 16.352 |
| H | 20.389 | 12.444 | 16.206 |
| O | 24.977 | 13.027 | 11.868 |
| H | 25.252 | 12.3   | 12.426 |
| H | 24.624 | 13.676 | 12.477 |
| O | 16.501 | 15.419 | 20.562 |
| H | 16.026 | 15.502 | 21.388 |
| H | 16.832 | 16.3   | 20.386 |
| O | 25.356 | 22.448 | 17.363 |
| H | 25.957 | 23.193 | 17.351 |
| H | 24.51  | 22.82  | 17.113 |
| O | 24.968 | 14.88  | 21.457 |
| H | 25.063 | 13.947 | 21.268 |
| H | 24.656 | 15.261 | 20.636 |
| O | 9.428  | 18.475 | 18.235 |
| H | 8.496  | 18.538 | 18.445 |
| H | 9.453  | 18.386 | 17.282 |
| O | 21.547 | 23.357 | 21.133 |
| H | 22.255 | 23.657 | 20.563 |
| H | 21.957 | 23.253 | 21.991 |
| O | 9.908  | 17.41  | 23.452 |
| H | 10.793 | 17.759 | 23.344 |
| H | 9.347  | 18.185 | 23.484 |
| O | 15.072 | 21.246 | 16.941 |
| H | 15.033 | 21.149 | 17.893 |
| H | 15.506 | 22.088 | 16.804 |
| O | 17.755 | 17.448 | 12.332 |
| H | 18.247 | 17.413 | 13.152 |
| H | 16.93  | 17.005 | 12.528 |
| O | 16.921 | 23.022 | 22.968 |
| H | 16.499 | 23.164 | 22.121 |
| H | 17.771 | 22.638 | 22.751 |
| O | 17.786 | 21.334 | 12.658 |
| H | 17.278 | 22.145 | 12.626 |
| H | 17.52  | 20.917 | 13.477 |
| O | 11.65  | 21.466 | 19.131 |
| H | 12.012 | 20.691 | 18.703 |

|   |        |        |        |
|---|--------|--------|--------|
| H | 11.042 | 21.833 | 18.489 |
| O | 25.465 | 16.898 | 23.713 |
| H | 25.257 | 16.216 | 23.076 |
| H | 24.796 | 17.568 | 23.574 |
| O | 14.927 | 15.308 | 22.925 |
| H | 14.754 | 14.585 | 23.528 |
| H | 14.552 | 16.075 | 23.358 |
| O | 27.736 | 17.219 | 19.315 |
| H | 27.382 | 17.243 | 18.426 |
| H | 27.865 | 16.288 | 19.496 |
| O | 14.371 | 13.497 | 24.665 |
| H | 13.969 | 12.678 | 24.955 |
| H | 15.312 | 13.331 | 24.71  |
| O | 21.31  | 21.552 | 17.118 |
| H | 20.371 | 21.738 | 17.095 |
| H | 21.367 | 20.637 | 17.392 |
| O | 20.386 | 16.855 | 22.874 |
| H | 19.688 | 16.2   | 22.901 |
| H | 21.169 | 16.361 | 22.63  |
| O | 16.815 | 12.151 | 21.77  |
| H | 15.968 | 12.574 | 21.625 |
| H | 17.118 | 11.915 | 20.894 |
| O | 23.346 | 13.405 | 24.485 |
| H | 23.579 | 13.548 | 25.403 |
| H | 24.171 | 13.162 | 24.065 |
| O | 27.268 | 12.771 | 15.442 |
| H | 26.34  | 12.54  | 15.396 |
| H | 27.646 | 12.406 | 14.643 |
| O | 20.594 | 10.31  | 22.154 |
| H | 21.357 | 9.739  | 22.06  |
| H | 20.755 | 10.793 | 22.965 |
| O | 19.409 | 24.33  | 19.467 |
| H | 20.177 | 23.984 | 19.922 |
| H | 19.523 | 24.05  | 18.559 |
| O | 15.15  | 23.322 | 20.352 |
| H | 15.685 | 22.545 | 20.191 |
| H | 14.359 | 22.986 | 20.773 |
| O | 22.52  | 22.091 | 13.856 |
| H | 21.633 | 22.215 | 13.52  |
| H | 22.443 | 22.242 | 14.798 |
| O | 18.279 | 15.065 | 22.961 |
| H | 17.794 | 15.164 | 23.781 |
| H | 17.829 | 14.357 | 22.501 |
| O | 18.629 | 18.047 | 24.495 |
| H | 19.425 | 17.798 | 24.027 |
| H | 18.252 | 17.217 | 24.786 |
| O | 19.091 | 21.702 | 21.61  |

|   |        |        |        |
|---|--------|--------|--------|
| H | 19.893 | 21.913 | 21.132 |
| H | 19.386 | 21.511 | 22.501 |
| O | 21.055 | 15.483 | 13.922 |
| H | 20.52  | 14.923 | 14.484 |
| H | 21.497 | 16.077 | 14.529 |
| O | 24.222 | 10.565 | 18.262 |
| H | 24.868 | 9.939  | 18.589 |
| H | 24.551 | 10.82  | 17.4   |
| O | 25.046 | 11.998 | 21.977 |
| H | 25.844 | 12.043 | 22.503 |
| H | 24.907 | 11.062 | 21.832 |
| O | 19.672 | 12.13  | 20.083 |
| H | 18.909 | 11.736 | 19.661 |
| H | 19.929 | 11.496 | 20.753 |
| O | 20.735 | 10.817 | 17.859 |
| H | 21.253 | 10.076 | 18.174 |
| H | 20.533 | 11.319 | 18.649 |
| O | 22.325 | 8.632  | 18.507 |
| H | 23.08  | 9.21   | 18.608 |
| H | 21.889 | 8.655  | 19.359 |
| O | 18.636 | 14.472 | 19.061 |
| H | 19.069 | 13.674 | 19.365 |
| H | 18.005 | 14.68  | 19.751 |
| O | 17.242 | 11.293 | 18.992 |
| H | 17.164 | 10.418 | 18.613 |
| H | 16.411 | 11.72  | 18.781 |
| O | 11.233 | 24.062 | 21.261 |
| H | 10.486 | 23.476 | 21.134 |
| H | 11.931 | 23.493 | 21.584 |
| O | 9.281  | 21.829 | 21.265 |
| H | 8.698  | 22.45  | 20.829 |
| H | 9.496  | 21.187 | 20.588 |
| O | 10.627 | 16.069 | 14.79  |
| H | 10.043 | 16.794 | 15.01  |
| H | 11.485 | 16.478 | 14.678 |
| O | 10.889 | 20.232 | 15.06  |
| H | 10.994 | 20.785 | 14.286 |
| H | 11.766 | 20.18  | 15.439 |
| O | 15.493 | 21.324 | 26.146 |
| H | 15.28  | 22.159 | 25.728 |
| H | 15.233 | 21.441 | 27.059 |
| O | 9.436  | 21.342 | 17.242 |
| H | 9.867  | 22.169 | 17.025 |
| H | 9.86   | 20.696 | 16.678 |
| O | 12.158 | 18.656 | 26.6   |
| H | 11.225 | 18.793 | 26.439 |
| H | 12.596 | 19.249 | 25.989 |



|   |        |        |        |
|---|--------|--------|--------|
| O | 13.184 | 21.666 | 21.343 |
| H | 13.397 | 20.762 | 21.574 |
| H | 12.751 | 21.6   | 20.492 |
| O | 10.827 | 15.006 | 21.802 |
| H | 11.27  | 15.512 | 21.121 |
| H | 10.502 | 15.664 | 22.417 |
| O | 11.083 | 14.387 | 17.521 |
| H | 10.829 | 15.24  | 17.873 |
| H | 11.042 | 14.498 | 16.572 |

**Table S11. PYP chromophore + 146 waters**

| <b>Method</b>   | <b>Time(s)</b> | <b>iterations</b> | <b>E(eV)</b> | <b>f</b>   |
|-----------------|----------------|-------------------|--------------|------------|
| <b>CIS</b>      | <b>217.5</b>   | <b>12</b>         | <b>3.64</b>  | <b>1.6</b> |
| <b>TD-BLYP</b>  | <b>77.7</b>    | <b>6</b>          | <b>0.03</b>  | <b>0.0</b> |
| <b>TD-B3LYP</b> | <b>173.4</b>   | <b>6</b>          | <b>1.27</b>  | <b>0.0</b> |

|   |        |        |        |
|---|--------|--------|--------|
| C | 22.967 | 16.81  | 19.507 |
| C | 24.27  | 16.774 | 18.931 |
| C | 24.617 | 15.671 | 18.139 |
| C | 23.681 | 14.66  | 17.949 |
| C | 22.419 | 14.608 | 18.558 |
| C | 22.092 | 15.731 | 19.368 |
| S | 22.3   | 18.226 | 20.373 |
| C | 21.107 | 18.737 | 19.24  |
| C | 19.881 | 18.611 | 19.724 |
| O | 21.503 | 18.978 | 18.056 |
| C | 18.678 | 18.857 | 18.895 |
| C | 17.412 | 18.7   | 19.379 |
| C | 16.267 | 18.768 | 18.424 |
| C | 15.007 | 18.753 | 18.949 |
| C | 14.627 | 18.622 | 20.339 |
| C | 15.744 | 18.498 | 21.241 |
| C | 17.075 | 18.511 | 20.793 |
| O | 13.416 | 18.649 | 20.62  |
| H | 25.016 | 17.532 | 19.156 |
| H | 25.561 | 15.727 | 17.603 |
| H | 23.959 | 13.891 | 17.234 |
| H | 21.774 | 13.742 | 18.433 |
| H | 21.138 | 15.665 | 19.885 |
| H | 19.762 | 18.159 | 20.708 |
| H | 18.901 | 19.227 | 17.895 |
| H | 16.528 | 18.974 | 17.391 |
| H | 14.139 | 18.825 | 18.303 |
| H | 15.6   | 18.345 | 22.305 |
| H | 17.886 | 18.502 | 21.514 |
| O | 30.112 | 21.211 | 18.047 |
| H | 30.308 | 22.125 | 18.252 |
| H | 29.292 | 21.246 | 17.554 |
| O | 28.391 | 13.11  | 22.223 |
| H | 29.252 | 12.971 | 21.829 |
| H | 28.33  | 12.444 | 22.907 |
| O | 24.938 | 16.847 | 11.925 |
| H | 24.601 | 17.235 | 12.732 |
| H | 25.689 | 16.325 | 12.206 |
| O | 26.315 | 12.269 | 19.428 |
| H | 25.586 | 12.142 | 20.035 |
| H | 26.005 | 11.901 | 18.601 |

|   |        |        |        |
|---|--------|--------|--------|
| O | 29.689 | 10.354 | 19.041 |
| H | 30.009 | 9.628  | 18.504 |
| H | 28.925 | 10.684 | 18.568 |
| O | 31.465 | 16.672 | 14.469 |
| H | 32.168 | 16.029 | 14.378 |
| H | 30.721 | 16.168 | 14.799 |
| O | 30.751 | 18.966 | 19.536 |
| H | 30.85  | 19.768 | 19.022 |
| H | 29.824 | 18.742 | 19.454 |
| O | 21.624 | 17.545 | 15.698 |
| H | 21.844 | 17.862 | 16.574 |
| H | 21.068 | 18.23  | 15.328 |
| O | 27.301 | 20.143 | 19.909 |
| H | 26.457 | 20.142 | 19.458 |
| H | 27.68  | 19.287 | 19.713 |
| O | 31.889 | 16.56  | 19.452 |
| H | 32.012 | 16.092 | 20.278 |
| H | 31.432 | 17.364 | 19.699 |
| O | 30.544 | 12.556 | 20.427 |
| H | 30.218 | 11.819 | 19.909 |
| H | 30.792 | 13.214 | 19.777 |
| O | 28.345 | 21.116 | 22.423 |
| H | 29.083 | 21.585 | 22.033 |
| H | 27.883 | 20.733 | 21.678 |
| O | 24.737 | 20.209 | 19.019 |
| H | 24.671 | 20.885 | 18.345 |
| H | 23.926 | 19.706 | 18.934 |
| O | 24.407 | 14.872 | 14.057 |
| H | 23.679 | 14.548 | 14.587 |
| H | 24.691 | 15.67  | 14.502 |
| O | 27.84  | 14.376 | 19.85  |
| H | 27.952 | 14.292 | 20.797 |
| H | 27.401 | 13.566 | 19.588 |
| O | 29.304 | 15.125 | 15.496 |
| H | 29.712 | 15.071 | 16.36  |
| H | 28.974 | 14.241 | 15.332 |
| O | 27.648 | 21.192 | 16.796 |
| H | 27.35  | 20.499 | 16.206 |
| H | 26.861 | 21.705 | 16.979 |
| O | 24.198 | 19.84  | 23.687 |
| H | 24.475 | 20.696 | 23.361 |
| H | 23.265 | 19.795 | 23.477 |
| O | 27.561 | 17.119 | 16.412 |
| H | 27.549 | 17.874 | 15.824 |
| H | 28.209 | 16.527 | 16.028 |
| O | 25.055 | 10.896 | 15.923 |
| H | 24.361 | 10.877 | 15.264 |

|   |        |        |        |
|---|--------|--------|--------|
| H | 25.56  | 10.099 | 15.762 |
| O | 27.663 | 15.508 | 12.777 |
| H | 28.527 | 15.453 | 12.369 |
| H | 27.845 | 15.681 | 13.701 |
| O | 26.642 | 8.919  | 16.155 |
| H | 27.111 | 8.832  | 15.325 |
| H | 27.2   | 8.476  | 16.794 |
| O | 28.184 | 19.383 | 14.719 |
| H | 27.476 | 19.592 | 14.11  |
| H | 28.984 | 19.585 | 14.233 |
| O | 29.441 | 10.867 | 16.12  |
| H | 29.416 | 10.227 | 15.408 |
| H | 28.616 | 11.345 | 16.04  |
| O | 12.238 | 24.196 | 24.379 |
| H | 12.264 | 25.01  | 23.876 |
| H | 13.158 | 23.962 | 24.504 |
| O | 13.129 | 20.587 | 24.819 |
| H | 14.035 | 20.781 | 25.059 |
| H | 12.692 | 21.438 | 24.822 |
| O | 16.841 | 21.428 | 19.485 |
| H | 17.664 | 21.307 | 19.96  |
| H | 16.432 | 20.562 | 19.491 |
| O | 14.1   | 25.544 | 16.465 |
| H | 14.254 | 26.406 | 16.851 |
| H | 13.352 | 25.195 | 16.95  |
| O | 10.628 | 21.988 | 23.73  |
| H | 11.119 | 22.808 | 23.678 |
| H | 10.072 | 21.992 | 22.95  |
| O | 12.756 | 16.479 | 24.912 |
| H | 13.482 | 16.7   | 25.496 |
| H | 12.671 | 17.239 | 24.337 |
| O | 16.042 | 14.118 | 27.054 |
| H | 15.404 | 14.757 | 26.737 |
| H | 16.134 | 14.312 | 27.986 |
| O | 23.729 | 23.294 | 23.224 |
| H | 24.058 | 24.189 | 23.134 |
| H | 24.062 | 22.838 | 22.451 |
| O | 19.811 | 22.199 | 24.228 |
| H | 20.647 | 22.43  | 24.631 |
| H | 19.187 | 22.198 | 24.953 |
| O | 22.458 | 17.144 | 25.325 |
| H | 22.54  | 16.622 | 24.528 |
| H | 23.125 | 17.825 | 25.235 |
| O | 14.851 | 23.762 | 24.915 |
| H | 15.36  | 24.056 | 24.159 |
| H | 15.232 | 24.231 | 25.657 |
| O | 12.496 | 18.392 | 23.093 |

|   |        |        |        |
|---|--------|--------|--------|
| H | 12.583 | 19.222 | 23.562 |
| H | 12.739 | 18.6   | 22.191 |
| O | 10.883 | 14.903 | 26.04  |
| H | 10.417 | 14.692 | 25.231 |
| H | 11.719 | 15.265 | 25.746 |
| O | 11.851 | 12.855 | 23.124 |
| H | 11.658 | 13.712 | 22.744 |
| H | 12.698 | 12.969 | 23.555 |
| O | 10.014 | 20.59  | 26.179 |
| H | 9.549  | 21.152 | 26.799 |
| H | 10.185 | 21.155 | 25.426 |
| O | 19.394 | 15.833 | 16.886 |
| H | 20.083 | 16.332 | 17.326 |
| H | 18.978 | 15.332 | 17.587 |
| O | 16.945 | 12.623 | 24.602 |
| H | 16.984 | 12.276 | 23.71  |
| H | 17.651 | 12.172 | 25.065 |
| O | 23.37  | 10.671 | 13.931 |
| H | 22.71  | 9.994  | 14.082 |
| H | 22.878 | 11.41  | 13.574 |
| O | 15.044 | 14.239 | 14.849 |
| H | 14.889 | 15.184 | 14.839 |
| H | 15.803 | 14.127 | 15.421 |
| O | 17.468 | 17.185 | 14.984 |
| H | 17.92  | 16.542 | 15.53  |
| H | 16.609 | 17.286 | 15.394 |
| O | 14.403 | 16.848 | 15.969 |
| H | 13.948 | 17.67  | 16.154 |
| H | 14.21  | 16.292 | 16.723 |
| O | 25.06  | 21.993 | 21.145 |
| H | 25.996 | 22.109 | 20.98  |
| H | 24.83  | 21.197 | 20.666 |
| O | 17.57  | 13.249 | 16.234 |
| H | 18.437 | 13.654 | 16.246 |
| H | 17.195 | 13.459 | 17.089 |
| O | 15.28  | 15.817 | 12.454 |
| H | 14.861 | 15.48  | 11.662 |
| H | 15.297 | 15.07  | 13.052 |
| O | 21.627 | 12.663 | 13.231 |
| H | 21.25  | 12.924 | 14.071 |
| H | 21.47  | 13.412 | 12.655 |
| O | 17.755 | 15.73  | 25.649 |
| H | 18.607 | 15.4   | 25.932 |
| H | 17.126 | 15.092 | 25.988 |
| O | 18.731 | 22.555 | 17.426 |
| H | 17.984 | 22.738 | 16.856 |
| H | 18.404 | 22.718 | 18.31  |

|   |        |        |        |
|---|--------|--------|--------|
| O | 14.368 | 13.467 | 21.096 |
| H | 14.669 | 14.215 | 21.613 |
| H | 14.139 | 13.841 | 20.245 |
| O | 22.909 | 23.677 | 16.692 |
| H | 22.302 | 24.379 | 16.929 |
| H | 22.394 | 22.875 | 16.78  |
| O | 8.898  | 18.427 | 15.597 |
| H | 9.56   | 19.004 | 15.215 |
| H | 8.079  | 18.693 | 15.179 |
| O | 11.489 | 21.897 | 12.634 |
| H | 12.403 | 21.614 | 12.659 |
| H | 11.531 | 22.85  | 12.711 |
| O | 21.335 | 19.709 | 23.292 |
| H | 20.775 | 20.422 | 23.599 |
| H | 20.725 | 19.007 | 23.064 |
| O | 25.524 | 21.135 | 12.809 |
| H | 25.102 | 20.588 | 12.146 |
| H | 25.298 | 22.031 | 12.559 |
| O | 11.386 | 16.902 | 19.667 |
| H | 10.675 | 17.357 | 19.216 |
| H | 11.773 | 17.567 | 20.236 |
| O | 27.741 | 16.05  | 24.581 |
| H | 26.823 | 16.164 | 24.335 |
| H | 28.205 | 16.731 | 24.094 |
| O | 15.712 | 18.646 | 24.882 |
| H | 16.604 | 18.442 | 24.598 |
| H | 15.821 | 19.333 | 25.539 |
| O | 24.681 | 20.073 | 14.961 |
| H | 23.846 | 20.534 | 15.05  |
| H | 25.116 | 20.506 | 14.227 |
| O | 18.261 | 22.005 | 26.323 |
| H | 17.341 | 22.148 | 26.101 |
| H | 18.241 | 21.652 | 27.212 |
| O | 15.03  | 16.584 | 26.547 |
| H | 15.496 | 17.223 | 26.006 |
| H | 14.873 | 17.039 | 27.374 |
| O | 19.257 | 18.968 | 27.196 |
| H | 19.113 | 18.833 | 26.259 |
| H | 19.164 | 18.097 | 27.581 |
| O | 13.242 | 15.061 | 18.782 |
| H | 12.414 | 14.723 | 18.441 |
| H | 13.003 | 15.872 | 19.231 |
| O | 18.487 | 11.278 | 13.645 |
| H | 18.181 | 11.915 | 13     |
| H | 18.748 | 11.807 | 14.399 |
| O | 14.272 | 18.25  | 13.393 |
| H | 14.767 | 17.467 | 13.154 |

|   |        |        |        |
|---|--------|--------|--------|
| H | 13.532 | 18.261 | 12.786 |
| O | 21.4   | 11.534 | 24.354 |
| H | 22.108 | 10.945 | 24.616 |
| H | 21.833 | 12.373 | 24.195 |
| O | 14.464 | 18.51  | 28.583 |
| H | 13.694 | 19.017 | 28.328 |
| H | 14.964 | 19.1   | 29.147 |
| O | 13.277 | 19.405 | 15.875 |
| H | 13.618 | 19.224 | 14.999 |
| H | 13.859 | 20.078 | 16.225 |
| O | 15.771 | 14.127 | 18.118 |
| H | 16.154 | 14.342 | 18.969 |
| H | 14.88  | 14.475 | 18.163 |
| O | 14.25  | 22.462 | 13.34  |
| H | 14.147 | 22.425 | 12.389 |
| H | 15.019 | 23.016 | 13.476 |
| O | 22.076 | 9.108  | 15.841 |
| H | 22.533 | 9.041  | 16.68  |
| H | 21.422 | 9.793  | 15.978 |
| O | 24.223 | 17.423 | 14.731 |
| H | 23.553 | 17.297 | 15.402 |
| H | 24.473 | 18.344 | 14.812 |
| O | 27.991 | 19.053 | 24.709 |
| H | 27.83  | 19.759 | 24.083 |
| H | 27.119 | 18.729 | 24.934 |
| O | 21.065 | 25.826 | 17.148 |
| H | 21.323 | 26.57  | 17.693 |
| H | 20.241 | 26.1   | 16.744 |
| O | 19.662 | 19.241 | 14.753 |
| H | 19.241 | 19.991 | 14.332 |
| H | 18.958 | 18.601 | 14.862 |
| O | 22.74  | 15.438 | 22.947 |
| H | 23.517 | 15.344 | 22.397 |
| H | 22.671 | 14.602 | 23.409 |
| O | 22.303 | 16.254 | 11.052 |
| H | 23.249 | 16.2   | 11.189 |
| H | 21.924 | 15.914 | 11.862 |
| O | 16.339 | 23.922 | 16.134 |
| H | 16.628 | 24.337 | 15.322 |
| H | 15.499 | 24.337 | 16.33  |
| O | 21.65  | 19.95  | 11.103 |
| H | 21.479 | 19.292 | 11.777 |
| H | 21.353 | 20.773 | 11.491 |
| O | 16.783 | 20.269 | 14.756 |
| H | 16.29  | 20.474 | 15.55  |
| H | 16.349 | 19.496 | 14.397 |
| O | 20.451 | 13.255 | 15.701 |

|   |        |        |        |
|---|--------|--------|--------|
| H | 20.65  | 13.928 | 16.352 |
| H | 20.389 | 12.444 | 16.206 |
| O | 24.977 | 13.027 | 11.868 |
| H | 25.252 | 12.3   | 12.426 |
| H | 24.624 | 13.676 | 12.477 |
| O | 18.644 | 13.758 | 12.463 |
| H | 18.538 | 14.559 | 12.976 |
| H | 18.746 | 14.063 | 11.561 |
| O | 16.501 | 15.419 | 20.562 |
| H | 16.026 | 15.502 | 21.388 |
| H | 16.832 | 16.3   | 20.386 |
| O | 27.658 | 10.103 | 21.625 |
| H | 28.235 | 10.275 | 20.881 |
| H | 27.592 | 10.945 | 22.077 |
| O | 25.356 | 22.448 | 17.363 |
| H | 25.957 | 23.193 | 17.351 |
| H | 24.51  | 22.82  | 17.113 |
| O | 24.968 | 14.88  | 21.457 |
| H | 25.063 | 13.947 | 21.268 |
| H | 24.656 | 15.261 | 20.636 |
| O | 16.794 | 19.565 | 10.797 |
| H | 16.91  | 18.774 | 11.323 |
| H | 17.268 | 20.244 | 11.278 |
| O | 9.428  | 18.475 | 18.235 |
| H | 8.496  | 18.538 | 18.445 |
| H | 9.453  | 18.386 | 17.282 |
| O | 21.547 | 23.357 | 21.133 |
| H | 22.255 | 23.657 | 20.563 |
| H | 21.957 | 23.253 | 21.991 |
| O | 9.908  | 17.41  | 23.452 |
| H | 10.793 | 17.759 | 23.344 |
| H | 9.347  | 18.185 | 23.484 |
| O | 15.072 | 21.246 | 16.941 |
| H | 15.033 | 21.149 | 17.893 |
| H | 15.506 | 22.088 | 16.804 |
| O | 17.755 | 17.448 | 12.332 |
| H | 18.247 | 17.413 | 13.152 |
| H | 16.93  | 17.005 | 12.528 |
| O | 16.921 | 23.022 | 22.968 |
| H | 16.499 | 23.164 | 22.121 |
| H | 17.771 | 22.638 | 22.751 |
| O | 8.472  | 19.84  | 23.852 |
| H | 8.277  | 20.697 | 23.474 |
| H | 8.95   | 20.037 | 24.658 |
| O | 17.786 | 21.334 | 12.658 |
| H | 17.278 | 22.145 | 12.626 |
| H | 17.52  | 20.917 | 13.477 |



|   |        |        |        |
|---|--------|--------|--------|
| O | 11.65  | 21.466 | 19.131 |
| H | 12.012 | 20.691 | 18.703 |
| H | 11.042 | 21.833 | 18.489 |
| O | 25.465 | 16.898 | 23.713 |
| H | 25.257 | 16.216 | 23.076 |
| H | 24.796 | 17.568 | 23.574 |
| O | 25.204 | 18.77  | 26.226 |
| H | 24.96  | 19.407 | 25.555 |
| H | 24.691 | 19.022 | 26.994 |
| O | 14.927 | 15.308 | 22.925 |
| H | 14.754 | 14.585 | 23.528 |
| H | 14.552 | 16.075 | 23.358 |
| O | 27.736 | 17.219 | 19.315 |
| H | 27.382 | 17.243 | 18.426 |
| H | 27.865 | 16.288 | 19.496 |
| O | 14.371 | 13.497 | 24.665 |
| H | 13.969 | 12.678 | 24.955 |
| H | 15.312 | 13.331 | 24.71  |
| O | 20.257 | 22.752 | 12.421 |
| H | 19.441 | 22.302 | 12.202 |
| H | 19.999 | 23.665 | 12.552 |
| O | 16.52  | 23.984 | 12.622 |
| H | 16.125 | 24.529 | 11.941 |
| H | 17.05  | 24.593 | 13.138 |
| O | 21.31  | 21.552 | 17.118 |
| H | 20.371 | 21.738 | 17.095 |
| H | 21.367 | 20.637 | 17.392 |
| O | 28.098 | 12.063 | 12.714 |
| H | 28.49  | 12.491 | 11.953 |
| H | 27.572 | 11.353 | 12.345 |
| O | 20.386 | 16.855 | 22.874 |
| H | 19.688 | 16.2   | 22.901 |
| H | 21.169 | 16.361 | 22.63  |
| O | 16.815 | 12.151 | 21.77  |
| H | 15.968 | 12.574 | 21.625 |
| H | 17.118 | 11.915 | 20.894 |
| O | 23.346 | 13.405 | 24.485 |
| H | 23.579 | 13.548 | 25.403 |
| H | 24.171 | 13.162 | 24.065 |
| O | 27.268 | 12.771 | 15.442 |
| H | 26.34  | 12.54  | 15.396 |
| H | 27.646 | 12.406 | 14.643 |
| O | 20.594 | 10.31  | 22.154 |
| H | 21.357 | 9.739  | 22.06  |
| H | 20.755 | 10.793 | 22.965 |
| O | 19.409 | 24.33  | 19.467 |
| H | 20.177 | 23.984 | 19.922 |

|   |        |        |        |
|---|--------|--------|--------|
| H | 19.523 | 24.05  | 18.559 |
| O | 15.15  | 23.322 | 20.352 |
| H | 15.685 | 22.545 | 20.191 |
| H | 14.359 | 22.986 | 20.773 |
| O | 22.52  | 22.091 | 13.856 |
| H | 21.633 | 22.215 | 13.52  |
| H | 22.443 | 22.242 | 14.798 |
| O | 18.279 | 15.065 | 22.961 |
| H | 17.794 | 15.164 | 23.781 |
| H | 17.829 | 14.357 | 22.501 |
| O | 28.018 | 22.874 | 19.665 |
| H | 27.946 | 21.926 | 19.553 |
| H | 28.904 | 23.008 | 20.002 |
| O | 18.629 | 18.047 | 24.495 |
| H | 19.425 | 17.798 | 24.027 |
| H | 18.252 | 17.217 | 24.786 |
| O | 19.091 | 21.702 | 21.61  |
| H | 19.893 | 21.913 | 21.132 |
| H | 19.386 | 21.511 | 22.501 |
| O | 23.917 | 24.227 | 20.046 |
| H | 24.379 | 23.451 | 20.363 |
| H | 24.368 | 24.46  | 19.235 |
| O | 21.055 | 15.483 | 13.922 |
| H | 20.52  | 14.923 | 14.484 |
| H | 21.497 | 16.077 | 14.529 |
| O | 24.222 | 10.565 | 18.262 |
| H | 24.868 | 9.939  | 18.589 |
| H | 24.551 | 10.82  | 17.4   |
| O | 25.046 | 11.998 | 21.977 |
| H | 25.844 | 12.043 | 22.503 |
| H | 24.907 | 11.062 | 21.832 |
| O | 22.582 | 8.671  | 21.629 |
| H | 22.293 | 7.763  | 21.724 |
| H | 23.441 | 8.695  | 22.051 |
| O | 19.672 | 12.13  | 20.083 |
| H | 18.909 | 11.736 | 19.661 |
| H | 19.929 | 11.496 | 20.753 |
| O | 25.745 | 8.456  | 19.464 |
| H | 26.1   | 7.602  | 19.219 |
| H | 25.767 | 8.46   | 20.421 |
| O | 20.735 | 10.817 | 17.859 |
| H | 21.253 | 10.076 | 18.174 |
| H | 20.533 | 11.319 | 18.649 |
| O | 22.325 | 8.632  | 18.507 |
| H | 23.08  | 9.21   | 18.608 |
| H | 21.889 | 8.655  | 19.359 |
| O | 18.294 | 8.698  | 21.634 |

|   |        |        |        |
|---|--------|--------|--------|
| H | 19.002 | 9.278  | 21.914 |
| H | 17.596 | 8.848  | 22.271 |
| O | 18.636 | 14.472 | 19.061 |
| H | 19.069 | 13.674 | 19.365 |
| H | 18.005 | 14.68  | 19.751 |
| O | 17.242 | 11.293 | 18.992 |
| H | 17.164 | 10.418 | 18.613 |
| H | 16.411 | 11.72  | 18.781 |
| O | 11.233 | 24.062 | 21.261 |
| H | 10.486 | 23.476 | 21.134 |
| H | 11.931 | 23.493 | 21.584 |
| O | 9.281  | 21.829 | 21.265 |
| H | 8.698  | 22.45  | 20.829 |
| H | 9.496  | 21.187 | 20.588 |
| O | 10.627 | 16.069 | 14.79  |
| H | 10.043 | 16.794 | 15.01  |
| H | 11.485 | 16.478 | 14.678 |
| O | 10.889 | 20.232 | 15.06  |
| H | 10.994 | 20.785 | 14.286 |
| H | 11.766 | 20.18  | 15.439 |
| O | 15.493 | 21.324 | 26.146 |
| H | 15.28  | 22.159 | 25.728 |
| H | 15.233 | 21.441 | 27.059 |
| O | 9.436  | 21.342 | 17.242 |
| H | 9.867  | 22.169 | 17.025 |
| H | 9.86   | 20.696 | 16.678 |
| O | 12.158 | 18.656 | 26.6   |
| H | 11.225 | 18.793 | 26.439 |
| H | 12.596 | 19.249 | 25.989 |
| O | 13.184 | 21.666 | 21.343 |
| H | 13.397 | 20.762 | 21.574 |
| H | 12.751 | 21.6   | 20.492 |
| O | 11.853 | 25.183 | 18.281 |
| H | 11.887 | 24.91  | 19.198 |
| H | 11.671 | 26.122 | 18.318 |
| O | 6.632  | 18.898 | 19.134 |
| H | 6.882  | 18.464 | 19.949 |
| H | 6.162  | 18.226 | 18.64  |
| O | 10.827 | 15.006 | 21.802 |
| H | 11.27  | 15.512 | 21.121 |
| H | 10.502 | 15.664 | 22.417 |
| O | 11.083 | 14.387 | 17.521 |
| H | 10.829 | 15.24  | 17.873 |
| H | 11.042 | 14.498 | 16.572 |
| O | 10.412 | 23.596 | 16.652 |
| H | 10.728 | 24.219 | 17.306 |
| H | 10.385 | 24.097 | 15.837 |

|   |       |        |        |
|---|-------|--------|--------|
| O | 7.234 | 18.164 | 22.144 |
| H | 7.628 | 18.837 | 22.698 |
| H | 6.779 | 17.586 | 22.756 |

**Table S12. PYP chromophore + 192 waters**

| Method    | Time(s) | iterations | E(eV) | f   |
|-----------|---------|------------|-------|-----|
| CIS       | 318.1   | 12         | 3.64  | 1.6 |
| TD-BLYP   | -       | -          | -     | -   |
| TD-B3LYP* | 217.7   | 5          | 1.14  | 0.0 |

\*residual converged to only 0.00002

|   |        |        |        |
|---|--------|--------|--------|
| C | 22.967 | 16.81  | 19.507 |
| C | 24.27  | 16.774 | 18.931 |
| C | 24.617 | 15.671 | 18.139 |
| C | 23.681 | 14.66  | 17.949 |
| C | 22.419 | 14.608 | 18.558 |
| C | 22.092 | 15.731 | 19.368 |
| S | 22.3   | 18.226 | 20.373 |
| C | 21.107 | 18.737 | 19.24  |
| C | 19.881 | 18.611 | 19.724 |
| O | 21.503 | 18.978 | 18.056 |
| C | 18.678 | 18.857 | 18.895 |
| C | 17.412 | 18.7   | 19.379 |
| C | 16.267 | 18.768 | 18.424 |
| C | 15.007 | 18.753 | 18.949 |
| C | 14.627 | 18.622 | 20.339 |
| C | 15.744 | 18.498 | 21.241 |
| C | 17.075 | 18.511 | 20.793 |
| O | 13.416 | 18.649 | 20.62  |
| H | 25.016 | 17.532 | 19.156 |
| H | 25.561 | 15.727 | 17.603 |
| H | 23.959 | 13.891 | 17.234 |
| H | 21.774 | 13.742 | 18.433 |
| H | 21.138 | 15.665 | 19.885 |
| H | 19.762 | 18.159 | 20.708 |
| H | 18.901 | 19.227 | 17.895 |
| H | 16.528 | 18.974 | 17.391 |
| H | 14.139 | 18.825 | 18.303 |
| H | 15.6   | 18.345 | 22.305 |
| H | 17.886 | 18.502 | 21.514 |
| O | 30.112 | 21.211 | 18.047 |
| H | 30.308 | 22.125 | 18.252 |
| H | 29.292 | 21.246 | 17.554 |
| O | 28.391 | 13.11  | 22.223 |
| H | 29.252 | 12.971 | 21.829 |
| H | 28.33  | 12.444 | 22.907 |
| O | 24.938 | 16.847 | 11.925 |
| H | 24.601 | 17.235 | 12.732 |
| H | 25.689 | 16.325 | 12.206 |
| O | 32.469 | 14.752 | 21.385 |
| H | 33.348 | 14.759 | 21.766 |

|   |        |        |        |
|---|--------|--------|--------|
| H | 32.195 | 13.836 | 21.431 |
| O | 30.816 | 19.132 | 13.418 |
| H | 30.974 | 18.346 | 13.94  |
| H | 31.54  | 19.153 | 12.792 |
| O | 30.284 | 15.257 | 11.884 |
| H | 31.234 | 15.279 | 11.994 |
| H | 30.077 | 14.33  | 11.768 |
| O | 26.315 | 12.269 | 19.428 |
| H | 25.586 | 12.142 | 20.035 |
| H | 26.005 | 11.901 | 18.601 |
| O | 29.689 | 10.354 | 19.041 |
| H | 30.009 | 9.628  | 18.504 |
| H | 28.925 | 10.684 | 18.568 |
| O | 31.465 | 16.672 | 14.469 |
| H | 32.168 | 16.029 | 14.378 |
| H | 30.721 | 16.168 | 14.799 |
| O | 30.751 | 18.966 | 19.536 |
| H | 30.85  | 19.768 | 19.022 |
| H | 29.824 | 18.742 | 19.454 |
| O | 21.624 | 17.545 | 15.698 |
| H | 21.844 | 17.862 | 16.574 |
| H | 21.068 | 18.23  | 15.328 |
| O | 27.301 | 20.143 | 19.909 |
| H | 26.457 | 20.142 | 19.458 |
| H | 27.68  | 19.287 | 19.713 |
| O | 29.855 | 14.696 | 24.663 |
| H | 29.947 | 14.331 | 23.783 |
| H | 29.069 | 15.241 | 24.615 |
| O | 31.889 | 16.56  | 19.452 |
| H | 32.012 | 16.092 | 20.278 |
| H | 31.432 | 17.364 | 19.699 |
| O | 30.544 | 12.556 | 20.427 |
| H | 30.218 | 11.819 | 19.909 |
| H | 30.792 | 13.214 | 19.777 |
| O | 28.345 | 21.116 | 22.423 |
| H | 29.083 | 21.585 | 22.033 |
| H | 27.883 | 20.733 | 21.678 |
| O | 28.626 | 7.578  | 18.14  |
| H | 29.131 | 7.399  | 18.934 |
| H | 27.944 | 6.906  | 18.134 |
| O | 24.737 | 20.209 | 19.019 |
| H | 24.671 | 20.885 | 18.345 |
| H | 23.926 | 19.706 | 18.934 |
| O | 24.407 | 14.872 | 14.057 |
| H | 23.679 | 14.548 | 14.587 |
| H | 24.691 | 15.67  | 14.502 |
| O | 27.84  | 14.376 | 19.85  |

|   |        |        |        |
|---|--------|--------|--------|
| H | 27.952 | 14.292 | 20.797 |
| H | 27.401 | 13.566 | 19.588 |
| O | 29.304 | 15.125 | 15.496 |
| H | 29.712 | 15.071 | 16.36  |
| H | 28.974 | 14.241 | 15.332 |
| O | 27.648 | 21.192 | 16.796 |
| H | 27.35  | 20.499 | 16.206 |
| H | 26.861 | 21.705 | 16.979 |
| O | 29.094 | 23.158 | 15.712 |
| H | 28.684 | 22.32  | 15.928 |
| H | 29.846 | 22.923 | 15.168 |
| O | 24.198 | 19.84  | 23.687 |
| H | 24.475 | 20.696 | 23.361 |
| H | 23.265 | 19.795 | 23.477 |
| O | 31.049 | 20.49  | 23.466 |
| H | 31.305 | 20.855 | 22.619 |
| H | 30.106 | 20.348 | 23.391 |
| O | 27.561 | 17.119 | 16.412 |
| H | 27.549 | 17.874 | 15.824 |
| H | 28.209 | 16.527 | 16.028 |
| O | 25.055 | 10.896 | 15.923 |
| H | 24.361 | 10.877 | 15.264 |
| H | 25.56  | 10.099 | 15.762 |
| O | 27.663 | 15.508 | 12.777 |
| H | 28.527 | 15.453 | 12.369 |
| H | 27.845 | 15.681 | 13.701 |
| O | 26.642 | 8.919  | 16.155 |
| H | 27.111 | 8.832  | 15.325 |
| H | 27.2   | 8.476  | 16.794 |
| O | 22.286 | 8.889  | 11.272 |
| H | 23.098 | 9.247  | 10.913 |
| H | 22.562 | 8.394  | 12.043 |
| O | 28.184 | 19.383 | 14.719 |
| H | 27.476 | 19.592 | 14.11  |
| H | 28.984 | 19.585 | 14.233 |
| O | 25.355 | 8.517  | 22.306 |
| H | 25.206 | 7.892  | 23.016 |
| H | 26.306 | 8.621  | 22.275 |
| O | 29.441 | 10.867 | 16.12  |
| H | 29.416 | 10.227 | 15.408 |
| H | 28.616 | 11.345 | 16.04  |
| O | 28.552 | 8.795  | 13.93  |
| H | 29.499 | 8.672  | 13.861 |
| H | 28.268 | 8.976  | 13.034 |
| O | 12.238 | 24.196 | 24.379 |
| H | 12.264 | 25.01  | 23.876 |
| H | 13.158 | 23.962 | 24.504 |

|   |        |        |        |
|---|--------|--------|--------|
| O | 18.176 | 26.857 | 16.936 |
| H | 17.888 | 25.989 | 17.218 |
| H | 17.621 | 27.464 | 17.426 |
| O | 13.129 | 20.587 | 24.819 |
| H | 14.035 | 20.781 | 25.059 |
| H | 12.692 | 21.438 | 24.822 |
| O | 8.368  | 24.538 | 22.244 |
| H | 8.26   | 25.485 | 22.33  |
| H | 8.09   | 24.345 | 21.349 |
| O | 14.801 | 26.026 | 20.08  |
| H | 15.168 | 25.155 | 19.923 |
| H | 14.58  | 26.028 | 21.011 |
| O | 16.841 | 21.428 | 19.485 |
| H | 17.664 | 21.307 | 19.96  |
| H | 16.432 | 20.562 | 19.491 |
| O | 14.1   | 25.544 | 16.465 |
| H | 14.254 | 26.406 | 16.851 |
| H | 13.352 | 25.195 | 16.95  |
| O | 10.628 | 21.988 | 23.73  |
| H | 11.119 | 22.808 | 23.678 |
| H | 10.072 | 21.992 | 22.95  |
| O | 12.756 | 16.479 | 24.912 |
| H | 13.482 | 16.7   | 25.496 |
| H | 12.671 | 17.239 | 24.337 |
| O | 16.042 | 14.118 | 27.054 |
| H | 15.404 | 14.757 | 26.737 |
| H | 16.134 | 14.312 | 27.986 |
| O | 11.873 | 17.622 | 29.258 |
| H | 11.424 | 17.928 | 28.469 |
| H | 12.778 | 17.482 | 28.979 |
| O | 23.729 | 23.294 | 23.224 |
| H | 24.058 | 24.189 | 23.134 |
| H | 24.062 | 22.838 | 22.451 |
| O | 21.773 | 16.589 | 28.207 |
| H | 21.965 | 16.894 | 27.32  |
| H | 22.616 | 16.28  | 28.541 |
| O | 19.811 | 22.199 | 24.228 |
| H | 20.647 | 22.43  | 24.631 |
| H | 19.187 | 22.198 | 24.953 |
| O | 22.458 | 17.144 | 25.325 |
| H | 22.54  | 16.622 | 24.528 |
| H | 23.125 | 17.825 | 25.235 |
| O | 14.851 | 23.762 | 24.915 |
| H | 15.36  | 24.056 | 24.159 |
| H | 15.232 | 24.231 | 25.657 |
| O | 12.496 | 18.392 | 23.093 |
| H | 12.583 | 19.222 | 23.562 |



|   |        |        |        |
|---|--------|--------|--------|
| H | 12.739 | 18.6   | 22.191 |
| O | 13.511 | 21.266 | 28.659 |
| H | 12.659 | 21.659 | 28.471 |
| H | 13.674 | 21.478 | 29.579 |
| O | 9.923  | 17.477 | 27.295 |
| H | 9.111  | 17.051 | 27.568 |
| H | 10.363 | 16.827 | 26.747 |
| O | 10.883 | 14.903 | 26.04  |
| H | 10.417 | 14.692 | 25.231 |
| H | 11.719 | 15.265 | 25.746 |
| O | 11.851 | 12.855 | 23.124 |
| H | 11.658 | 13.712 | 22.744 |
| H | 12.698 | 12.969 | 23.555 |
| O | 10.014 | 20.59  | 26.179 |
| H | 9.549  | 21.152 | 26.799 |
| H | 10.185 | 21.155 | 25.426 |
| O | 19.394 | 15.833 | 16.886 |
| H | 20.083 | 16.332 | 17.326 |
| H | 18.978 | 15.332 | 17.587 |
| O | 16.945 | 12.623 | 24.602 |
| H | 16.984 | 12.276 | 23.71  |
| H | 17.651 | 12.172 | 25.065 |
| O | 23.37  | 10.671 | 13.931 |
| H | 22.71  | 9.994  | 14.082 |
| H | 22.878 | 11.41  | 13.574 |
| O | 15.044 | 14.239 | 14.849 |
| H | 14.889 | 15.184 | 14.839 |
| H | 15.803 | 14.127 | 15.421 |
| O | 17.468 | 17.185 | 14.984 |
| H | 17.92  | 16.542 | 15.53  |
| H | 16.609 | 17.286 | 15.394 |
| O | 14.403 | 16.848 | 15.969 |
| H | 13.948 | 17.67  | 16.154 |
| H | 14.21  | 16.292 | 16.723 |
| O | 15.941 | 22.78  | 28.839 |
| H | 15.971 | 22.046 | 29.452 |
| H | 16.454 | 23.468 | 29.264 |
| O | 25.06  | 21.993 | 21.145 |
| H | 25.996 | 22.109 | 20.98  |
| H | 24.83  | 21.197 | 20.666 |
| O | 17.57  | 13.249 | 16.234 |
| H | 18.437 | 13.654 | 16.246 |
| H | 17.195 | 13.459 | 17.089 |
| O | 15.28  | 15.817 | 12.454 |
| H | 14.861 | 15.48  | 11.662 |
| H | 15.297 | 15.07  | 13.052 |
| O | 21.627 | 12.663 | 13.231 |

|   |        |        |        |
|---|--------|--------|--------|
| H | 21.25  | 12.924 | 14.071 |
| H | 21.47  | 13.412 | 12.655 |
| O | 17.755 | 15.73  | 25.649 |
| H | 18.607 | 15.4   | 25.932 |
| H | 17.126 | 15.092 | 25.988 |
| O | 18.731 | 22.555 | 17.426 |
| H | 17.984 | 22.738 | 16.856 |
| H | 18.404 | 22.718 | 18.31  |
| O | 14.368 | 13.467 | 21.096 |
| H | 14.669 | 14.215 | 21.613 |
| H | 14.139 | 13.841 | 20.245 |
| O | 22.909 | 23.677 | 16.692 |
| H | 22.302 | 24.379 | 16.929 |
| H | 22.394 | 22.875 | 16.78  |
| O | 8.898  | 18.427 | 15.597 |
| H | 9.56   | 19.004 | 15.215 |
| H | 8.079  | 18.693 | 15.179 |
| O | 11.489 | 21.897 | 12.634 |
| H | 12.403 | 21.614 | 12.659 |
| H | 11.531 | 22.85  | 12.711 |
| O | 21.335 | 19.709 | 23.292 |
| H | 20.775 | 20.422 | 23.599 |
| H | 20.725 | 19.007 | 23.064 |
| O | 25.524 | 21.135 | 12.809 |
| H | 25.102 | 20.588 | 12.146 |
| H | 25.298 | 22.031 | 12.559 |
| O | 11.386 | 16.902 | 19.667 |
| H | 10.675 | 17.357 | 19.216 |
| H | 11.773 | 17.567 | 20.236 |
| O | 27.741 | 16.05  | 24.581 |
| H | 26.823 | 16.164 | 24.335 |
| H | 28.205 | 16.731 | 24.094 |
| O | 15.712 | 18.646 | 24.882 |
| H | 16.604 | 18.442 | 24.598 |
| H | 15.821 | 19.333 | 25.539 |
| O | 24.681 | 20.073 | 14.961 |
| H | 23.846 | 20.534 | 15.05  |
| H | 25.116 | 20.506 | 14.227 |
| O | 18.261 | 22.005 | 26.323 |
| H | 17.341 | 22.148 | 26.101 |
| H | 18.241 | 21.652 | 27.212 |
| O | 15.03  | 16.584 | 26.547 |
| H | 15.496 | 17.223 | 26.006 |
| H | 14.873 | 17.039 | 27.374 |
| O | 19.257 | 18.968 | 27.196 |
| H | 19.113 | 18.833 | 26.259 |
| H | 19.164 | 18.097 | 27.581 |

|   |        |        |        |
|---|--------|--------|--------|
| O | 13.242 | 15.061 | 18.782 |
| H | 12.414 | 14.723 | 18.441 |
| H | 13.003 | 15.872 | 19.231 |
| O | 18.487 | 11.278 | 13.645 |
| H | 18.181 | 11.915 | 13     |
| H | 18.748 | 11.807 | 14.399 |
| O | 16.854 | 8.504  | 19.286 |
| H | 17.512 | 8.476  | 19.98  |
| H | 16.016 | 8.472  | 19.748 |
| O | 14.272 | 18.25  | 13.393 |
| H | 14.767 | 17.467 | 13.154 |
| H | 13.532 | 18.261 | 12.786 |
| O | 21.4   | 11.534 | 24.354 |
| H | 22.108 | 10.945 | 24.616 |
| H | 21.833 | 12.373 | 24.195 |
| O | 14.464 | 18.51  | 28.583 |
| H | 13.694 | 19.017 | 28.328 |
| H | 14.964 | 19.1   | 29.147 |
| O | 13.277 | 19.405 | 15.875 |
| H | 13.618 | 19.224 | 14.999 |
| H | 13.859 | 20.078 | 16.225 |
| O | 15.771 | 14.127 | 18.118 |
| H | 16.154 | 14.342 | 18.969 |
| H | 14.88  | 14.475 | 18.163 |
| O | 14.25  | 22.462 | 13.34  |
| H | 14.147 | 22.425 | 12.389 |
| H | 15.019 | 23.016 | 13.476 |
| O | 22.076 | 9.108  | 15.841 |
| H | 22.533 | 9.041  | 16.68  |
| H | 21.422 | 9.793  | 15.978 |
| O | 24.223 | 17.423 | 14.731 |
| H | 23.553 | 17.297 | 15.402 |
| H | 24.473 | 18.344 | 14.812 |
| O | 6.718  | 15.743 | 20.562 |
| H | 6.749  | 16.374 | 21.281 |
| H | 7.498  | 15.202 | 20.685 |
| O | 27.991 | 19.053 | 24.709 |
| H | 27.83  | 19.759 | 24.083 |
| H | 27.119 | 18.729 | 24.934 |
| O | 25.571 | 16.088 | 26.879 |
| H | 25.369 | 16.91  | 26.432 |
| H | 26.523 | 16.094 | 26.975 |
| O | 24.569 | 19.77  | 10.825 |
| H | 23.627 | 19.909 | 10.921 |
| H | 24.689 | 18.832 | 10.973 |
| O | 21.065 | 25.826 | 17.148 |
| H | 21.323 | 26.57  | 17.693 |

|   |        |        |        |
|---|--------|--------|--------|
| H | 20.241 | 26.1   | 16.744 |
| O | 19.662 | 19.241 | 14.753 |
| H | 19.241 | 19.991 | 14.332 |
| H | 18.958 | 18.601 | 14.862 |
| O | 15.648 | 10.447 | 15.077 |
| H | 15.635 | 9.705  | 15.681 |
| H | 16.538 | 10.456 | 14.726 |
| O | 24.255 | 22.071 | 26.165 |
| H | 25.154 | 22.104 | 25.836 |
| H | 23.727 | 22.436 | 25.455 |
| O | 22.74  | 15.438 | 22.947 |
| H | 23.517 | 15.344 | 22.397 |
| H | 22.671 | 14.602 | 23.409 |
| O | 14.287 | 21.072 | 10.769 |
| H | 15.146 | 20.653 | 10.73  |
| H | 14.247 | 21.611 | 9.979  |
| O | 22.303 | 16.254 | 11.052 |
| H | 23.249 | 16.2   | 11.189 |
| H | 21.924 | 15.914 | 11.862 |
| O | 16.339 | 23.922 | 16.134 |
| H | 16.628 | 24.337 | 15.322 |
| H | 15.499 | 24.337 | 16.33  |
| O | 21.65  | 19.95  | 11.103 |
| H | 21.479 | 19.292 | 11.777 |
| H | 21.353 | 20.773 | 11.491 |
| O | 16.783 | 20.269 | 14.756 |
| H | 16.29  | 20.474 | 15.55  |
| H | 16.349 | 19.496 | 14.397 |
| O | 20.451 | 13.255 | 15.701 |
| H | 20.65  | 13.928 | 16.352 |
| H | 20.389 | 12.444 | 16.206 |
| O | 24.977 | 13.027 | 11.868 |
| H | 25.252 | 12.3   | 12.426 |
| H | 24.624 | 13.676 | 12.477 |
| O | 18.644 | 13.758 | 12.463 |
| H | 18.538 | 14.559 | 12.976 |
| H | 18.746 | 14.063 | 11.561 |
| O | 16.501 | 15.419 | 20.562 |
| H | 16.026 | 15.502 | 21.388 |
| H | 16.832 | 16.3   | 20.386 |
| O | 27.658 | 10.103 | 21.625 |
| H | 28.235 | 10.275 | 20.881 |
| H | 27.592 | 10.945 | 22.077 |
| O | 25.356 | 22.448 | 17.363 |
| H | 25.957 | 23.193 | 17.351 |
| H | 24.51  | 22.82  | 17.113 |
| O | 24.968 | 14.88  | 21.457 |

|   |        |        |        |
|---|--------|--------|--------|
| H | 25.063 | 13.947 | 21.268 |
| H | 24.656 | 15.261 | 20.636 |
| O | 16.794 | 19.565 | 10.797 |
| H | 16.91  | 18.774 | 11.323 |
| H | 17.268 | 20.244 | 11.278 |
| O | 9.428  | 18.475 | 18.235 |
| H | 8.496  | 18.538 | 18.445 |
| H | 9.453  | 18.386 | 17.282 |
| O | 21.547 | 23.357 | 21.133 |
| H | 22.255 | 23.657 | 20.563 |
| H | 21.957 | 23.253 | 21.991 |
| O | 24.396 | 23.347 | 12.071 |
| H | 24.119 | 24.109 | 11.562 |
| H | 23.629 | 23.12  | 12.597 |
| O | 9.908  | 17.41  | 23.452 |
| H | 10.793 | 17.759 | 23.344 |
| H | 9.347  | 18.185 | 23.484 |
| O | 15.072 | 21.246 | 16.941 |
| H | 15.033 | 21.149 | 17.893 |
| H | 15.506 | 22.088 | 16.804 |
| O | 17.755 | 17.448 | 12.332 |
| H | 18.247 | 17.413 | 13.152 |
| H | 16.93  | 17.005 | 12.528 |
| O | 16.921 | 23.022 | 22.968 |
| H | 16.499 | 23.164 | 22.121 |
| H | 17.771 | 22.638 | 22.751 |
| O | 8.472  | 19.84  | 23.852 |
| H | 8.277  | 20.697 | 23.474 |
| H | 8.95   | 20.037 | 24.658 |
| O | 17.786 | 21.334 | 12.658 |
| H | 17.278 | 22.145 | 12.626 |
| H | 17.52  | 20.917 | 13.477 |
| O | 11.65  | 21.466 | 19.131 |
| H | 12.012 | 20.691 | 18.703 |
| H | 11.042 | 21.833 | 18.489 |
| O | 25.465 | 16.898 | 23.713 |
| H | 25.257 | 16.216 | 23.076 |
| H | 24.796 | 17.568 | 23.574 |
| O | 25.204 | 18.77  | 26.226 |
| H | 24.96  | 19.407 | 25.555 |
| H | 24.691 | 19.022 | 26.994 |
| O | 17.469 | 25.759 | 23.544 |
| H | 17.553 | 24.829 | 23.332 |
| H | 18.056 | 25.889 | 24.288 |
| O | 14.927 | 15.308 | 22.925 |
| H | 14.754 | 14.585 | 23.528 |
| H | 14.552 | 16.075 | 23.358 |

|   |        |        |        |
|---|--------|--------|--------|
| O | 27.736 | 17.219 | 19.315 |
| H | 27.382 | 17.243 | 18.426 |
| H | 27.865 | 16.288 | 19.496 |
| O | 14.371 | 13.497 | 24.665 |
| H | 13.969 | 12.678 | 24.955 |
| H | 15.312 | 13.331 | 24.71  |
| O | 19.094 | 11.327 | 25.729 |
| H | 19.08  | 11.87  | 26.518 |
| H | 19.942 | 11.511 | 25.326 |
| O | 20.257 | 22.752 | 12.421 |
| H | 19.441 | 22.302 | 12.202 |
| H | 19.999 | 23.665 | 12.552 |
| O | 16.52  | 23.984 | 12.622 |
| H | 16.125 | 24.529 | 11.941 |
| H | 17.05  | 24.593 | 13.138 |
| O | 21.31  | 21.552 | 17.118 |
| H | 20.371 | 21.738 | 17.095 |
| H | 21.367 | 20.637 | 17.392 |
| O | 26.912 | 22.294 | 24.819 |
| H | 27.582 | 22.928 | 25.074 |
| H | 27.283 | 21.845 | 24.059 |
| O | 28.098 | 12.063 | 12.714 |
| H | 28.49  | 12.491 | 11.953 |
| H | 27.572 | 11.353 | 12.345 |
| O | 20.386 | 16.855 | 22.874 |
| H | 19.688 | 16.2   | 22.901 |
| H | 21.169 | 16.361 | 22.63  |
| O | 16.815 | 12.151 | 21.77  |
| H | 15.968 | 12.574 | 21.625 |
| H | 17.118 | 11.915 | 20.894 |
| O | 23.346 | 13.405 | 24.485 |
| H | 23.579 | 13.548 | 25.403 |
| H | 24.171 | 13.162 | 24.065 |
| O | 8.414  | 13.815 | 22.047 |
| H | 8.693  | 12.915 | 21.88  |
| H | 9.23   | 14.309 | 22.122 |
| O | 27.268 | 12.771 | 15.442 |
| H | 26.34  | 12.54  | 15.396 |
| H | 27.646 | 12.406 | 14.643 |
| O | 20.594 | 10.31  | 22.154 |
| H | 21.357 | 9.739  | 22.06  |
| H | 20.755 | 10.793 | 22.965 |
| O | 23.224 | 6.175  | 17.644 |
| H | 23.777 | 6.187  | 16.863 |
| H | 22.995 | 7.093  | 17.788 |
| O | 19.409 | 24.33  | 19.467 |
| H | 20.177 | 23.984 | 19.922 |

|   |        |        |        |
|---|--------|--------|--------|
| H | 19.523 | 24.05  | 18.559 |
| O | 15.15  | 23.322 | 20.352 |
| H | 15.685 | 22.545 | 20.191 |
| H | 14.359 | 22.986 | 20.773 |
| O | 22.52  | 22.091 | 13.856 |
| H | 21.633 | 22.215 | 13.52  |
| H | 22.443 | 22.242 | 14.798 |
| O | 18.279 | 15.065 | 22.961 |
| H | 17.794 | 15.164 | 23.781 |
| H | 17.829 | 14.357 | 22.501 |
| O | 28.018 | 22.874 | 19.665 |
| H | 27.946 | 21.926 | 19.553 |
| H | 28.904 | 23.008 | 20.002 |
| O | 17.628 | 25.957 | 14.337 |
| H | 17.759 | 26.13  | 15.27  |
| H | 18.137 | 26.635 | 13.894 |
| O | 18.629 | 18.047 | 24.495 |
| H | 19.425 | 17.798 | 24.027 |
| H | 18.252 | 17.217 | 24.786 |
| O | 19.091 | 21.702 | 21.61  |
| H | 19.893 | 21.913 | 21.132 |
| H | 19.386 | 21.511 | 22.501 |
| O | 23.917 | 24.227 | 20.046 |
| H | 24.379 | 23.451 | 20.363 |
| H | 24.368 | 24.46  | 19.235 |
| O | 21.055 | 15.483 | 13.922 |
| H | 20.52  | 14.923 | 14.484 |
| H | 21.497 | 16.077 | 14.529 |
| O | 24.222 | 10.565 | 18.262 |
| H | 24.868 | 9.939  | 18.589 |
| H | 24.551 | 10.82  | 17.4   |
| O | 25.046 | 11.998 | 21.977 |
| H | 25.844 | 12.043 | 22.503 |
| H | 24.907 | 11.062 | 21.832 |
| O | 20.387 | 10.75  | 11.029 |
| H | 20.686 | 11.237 | 11.797 |
| H | 21.093 | 10.129 | 10.849 |
| O | 24.633 | 24.894 | 15.023 |
| H | 24.047 | 24.343 | 15.542 |
| H | 24.047 | 25.426 | 14.484 |
| O | 27.14  | 14.032 | 10.141 |
| H | 26.858 | 14.497 | 10.93  |
| H | 26.466 | 13.368 | 10.001 |
| O | 22.582 | 8.671  | 21.629 |
| H | 22.293 | 7.763  | 21.724 |
| H | 23.441 | 8.695  | 22.051 |
| O | 19.672 | 12.13  | 20.083 |

|   |        |        |        |
|---|--------|--------|--------|
| H | 18.909 | 11.736 | 19.661 |
| H | 19.929 | 11.496 | 20.753 |
| O | 25.745 | 8.456  | 19.464 |
| H | 26.1   | 7.602  | 19.219 |
| H | 25.767 | 8.46   | 20.421 |
| O | 24.821 | 6.199  | 15.508 |
| H | 25.311 | 5.466  | 15.136 |
| H | 25.487 | 6.86   | 15.697 |
| O | 20.735 | 10.817 | 17.859 |
| H | 21.253 | 10.076 | 18.174 |
| H | 20.533 | 11.319 | 18.649 |
| O | 22.777 | 7.188  | 13.749 |
| H | 23.243 | 6.495  | 14.218 |
| H | 22.565 | 7.833  | 14.424 |
| O | 22.325 | 8.632  | 18.507 |
| H | 23.08  | 9.21   | 18.608 |
| H | 21.889 | 8.655  | 19.359 |
| O | 18.294 | 8.698  | 21.634 |
| H | 19.002 | 9.278  | 21.914 |
| H | 17.596 | 8.848  | 22.271 |
| O | 18.636 | 14.472 | 19.061 |
| H | 19.069 | 13.674 | 19.365 |
| H | 18.005 | 14.68  | 19.751 |
| O | 17.242 | 11.293 | 18.992 |
| H | 17.164 | 10.418 | 18.613 |
| H | 16.411 | 11.72  | 18.781 |
| O | 11.233 | 24.062 | 21.261 |
| H | 10.486 | 23.476 | 21.134 |
| H | 11.931 | 23.493 | 21.584 |
| O | 7.57   | 23.724 | 19.557 |
| H | 6.861  | 23.086 | 19.479 |
| H | 7.503  | 24.255 | 18.763 |
| O | 9.281  | 21.829 | 21.265 |
| H | 8.698  | 22.45  | 20.829 |
| H | 9.496  | 21.187 | 20.588 |
| O | 10.627 | 16.069 | 14.79  |
| H | 10.043 | 16.794 | 15.01  |
| H | 11.485 | 16.478 | 14.678 |
| O | 6.793  | 20.993 | 16.992 |
| H | 7.708  | 21.26  | 17.083 |
| H | 6.708  | 20.232 | 17.566 |
| O | 10.889 | 20.232 | 15.06  |
| H | 10.994 | 20.785 | 14.286 |
| H | 11.766 | 20.18  | 15.439 |
| O | 10.311 | 13.591 | 14.341 |
| H | 11.167 | 13.391 | 13.961 |
| H | 10.27  | 14.547 | 14.347 |



|   |        |        |        |
|---|--------|--------|--------|
| O | 15.493 | 21.324 | 26.146 |
| H | 15.28  | 22.159 | 25.728 |
| H | 15.233 | 21.441 | 27.059 |
| O | 9.923  | 11.473 | 21.452 |
| H | 10.413 | 11.212 | 20.673 |
| H | 10.595 | 11.737 | 22.08  |
| O | 9.436  | 21.342 | 17.242 |
| H | 9.867  | 22.169 | 17.025 |
| H | 9.86   | 20.696 | 16.678 |
| O | 12.158 | 18.656 | 26.6   |
| H | 11.225 | 18.793 | 26.439 |
| H | 12.596 | 19.249 | 25.989 |
| O | 13.184 | 21.666 | 21.343 |
| H | 13.397 | 20.762 | 21.574 |
| H | 12.751 | 21.6   | 20.492 |
| O | 8.511  | 15.399 | 24.713 |
| H | 8.957  | 16.163 | 24.349 |
| H | 7.882  | 15.144 | 24.038 |
| O | 11.364 | 11.877 | 18.304 |
| H | 11.246 | 12.788 | 18.033 |
| H | 12.181 | 11.607 | 17.884 |
| O | 11.853 | 25.183 | 18.281 |
| H | 11.887 | 24.91  | 19.198 |
| H | 11.671 | 26.122 | 18.318 |
| O | 13.069 | 12.808 | 13.633 |
| H | 13.689 | 12.119 | 13.395 |
| H | 13.468 | 13.241 | 14.388 |
| O | 6.632  | 18.898 | 19.134 |
| H | 6.882  | 18.464 | 19.949 |
| H | 6.162  | 18.226 | 18.64  |
| O | 10.827 | 15.006 | 21.802 |
| H | 11.27  | 15.512 | 21.121 |
| H | 10.502 | 15.664 | 22.417 |
| O | 11.083 | 14.387 | 17.521 |
| H | 10.829 | 15.24  | 17.873 |
| H | 11.042 | 14.498 | 16.572 |
| O | 13.664 | 10.862 | 21.141 |
| H | 13.498 | 10.818 | 20.199 |
| H | 13.795 | 11.794 | 21.317 |
| O | 10.412 | 23.596 | 16.652 |
| H | 10.728 | 24.219 | 17.306 |
| H | 10.385 | 24.097 | 15.837 |
| O | 7.234  | 18.164 | 22.144 |
| H | 7.628  | 18.837 | 22.698 |
| H | 6.779  | 17.586 | 22.756 |
| O | 12.741 | 18.302 | 11.121 |
| H | 11.822 | 18.561 | 11.053 |

H

13.228

19.063

10.804

**Table S13. PYP chromophore + 261 waters**

| Method    | Time(s) | iterations | E(eV) | f   |
|-----------|---------|------------|-------|-----|
| CIS       | 493.2   | 12         | 3.65  | 1.6 |
| TD-BLYP   | -       | -          | -     | -   |
| TD-B3LYP* | 335.2   | 5          | 0.86  | 0.0 |

\*residual converged to only 0.0007

|   |        |        |        |
|---|--------|--------|--------|
| C | 22.967 | 16.81  | 19.507 |
| C | 24.27  | 16.774 | 18.931 |
| C | 24.617 | 15.671 | 18.139 |
| C | 23.681 | 14.66  | 17.949 |
| C | 22.419 | 14.608 | 18.558 |
| C | 22.092 | 15.731 | 19.368 |
| S | 22.3   | 18.226 | 20.373 |
| C | 21.107 | 18.737 | 19.24  |
| C | 19.881 | 18.611 | 19.724 |
| O | 21.503 | 18.978 | 18.056 |
| C | 18.678 | 18.857 | 18.895 |
| C | 17.412 | 18.7   | 19.379 |
| C | 16.267 | 18.768 | 18.424 |
| C | 15.007 | 18.753 | 18.949 |
| C | 14.627 | 18.622 | 20.339 |
| C | 15.744 | 18.498 | 21.241 |
| C | 17.075 | 18.511 | 20.793 |
| O | 13.416 | 18.649 | 20.62  |
| H | 25.016 | 17.532 | 19.156 |
| H | 25.561 | 15.727 | 17.603 |
| H | 23.959 | 13.891 | 17.234 |
| H | 21.774 | 13.742 | 18.433 |
| H | 21.138 | 15.665 | 19.885 |
| H | 19.762 | 18.159 | 20.708 |
| H | 18.901 | 19.227 | 17.895 |
| H | 16.528 | 18.974 | 17.391 |
| H | 14.139 | 18.825 | 18.303 |
| H | 15.6   | 18.345 | 22.305 |
| H | 17.886 | 18.502 | 21.514 |
| O | 30.112 | 21.211 | 18.047 |
| H | 30.308 | 22.125 | 18.252 |
| H | 29.292 | 21.246 | 17.554 |
| O | 28.391 | 13.11  | 22.223 |
| H | 29.252 | 12.971 | 21.829 |
| H | 28.33  | 12.444 | 22.907 |
| O | 24.938 | 16.847 | 11.925 |
| H | 24.601 | 17.235 | 12.732 |
| H | 25.689 | 16.325 | 12.206 |
| O | 32.469 | 14.752 | 21.385 |

|   |        |        |        |
|---|--------|--------|--------|
| H | 33.348 | 14.759 | 21.766 |
| H | 32.195 | 13.836 | 21.431 |
| O | 30.816 | 19.132 | 13.418 |
| H | 30.974 | 18.346 | 13.94  |
| H | 31.54  | 19.153 | 12.792 |
| O | 30.284 | 15.257 | 11.884 |
| H | 31.234 | 15.279 | 11.994 |
| H | 30.077 | 14.33  | 11.768 |
| O | 32.263 | 11.353 | 17.063 |
| H | 32.41  | 10.514 | 17.499 |
| H | 31.311 | 11.441 | 17.027 |
| O | 33.28  | 18.588 | 15.193 |
| H | 33.815 | 17.822 | 15.401 |
| H | 32.532 | 18.235 | 14.713 |
| O | 26.315 | 12.269 | 19.428 |
| H | 25.586 | 12.142 | 20.035 |
| H | 26.005 | 11.901 | 18.601 |
| O | 29.689 | 10.354 | 19.041 |
| H | 30.009 | 9.628  | 18.504 |
| H | 28.925 | 10.684 | 18.568 |
| O | 31.465 | 16.672 | 14.469 |
| H | 32.168 | 16.029 | 14.378 |
| H | 30.721 | 16.168 | 14.799 |
| O | 30.751 | 18.966 | 19.536 |
| H | 30.85  | 19.768 | 19.022 |
| H | 29.824 | 18.742 | 19.454 |
| O | 21.624 | 17.545 | 15.698 |
| H | 21.844 | 17.862 | 16.574 |
| H | 21.068 | 18.23  | 15.328 |
| O | 27.301 | 20.143 | 19.909 |
| H | 26.457 | 20.142 | 19.458 |
| H | 27.68  | 19.287 | 19.713 |
| O | 29.855 | 14.696 | 24.663 |
| H | 29.947 | 14.331 | 23.783 |
| H | 29.069 | 15.241 | 24.615 |
| O | 31.889 | 16.56  | 19.452 |
| H | 32.012 | 16.092 | 20.278 |
| H | 31.432 | 17.364 | 19.699 |
| O | 30.544 | 12.556 | 20.427 |
| H | 30.218 | 11.819 | 19.909 |
| H | 30.792 | 13.214 | 19.777 |
| O | 32.612 | 20.608 | 17.136 |
| H | 31.709 | 20.388 | 17.362 |
| H | 32.89  | 19.906 | 16.547 |
| O | 28.345 | 21.116 | 22.423 |
| H | 29.083 | 21.585 | 22.033 |
| H | 27.883 | 20.733 | 21.678 |

|   |        |        |        |
|---|--------|--------|--------|
| O | 28.626 | 7.578  | 18.14  |
| H | 29.131 | 7.399  | 18.934 |
| H | 27.944 | 6.906  | 18.134 |
| O | 24.737 | 20.209 | 19.019 |
| H | 24.671 | 20.885 | 18.345 |
| H | 23.926 | 19.706 | 18.934 |
| O | 24.407 | 14.872 | 14.057 |
| H | 23.679 | 14.548 | 14.587 |
| H | 24.691 | 15.67  | 14.502 |
| O | 27.84  | 14.376 | 19.85  |
| H | 27.952 | 14.292 | 20.797 |
| H | 27.401 | 13.566 | 19.588 |
| O | 29.304 | 15.125 | 15.496 |
| H | 29.712 | 15.071 | 16.36  |
| H | 28.974 | 14.241 | 15.332 |
| O | 30.935 | 23.768 | 18.813 |
| H | 31.045 | 24.586 | 19.299 |
| H | 31.712 | 23.253 | 19.032 |
| O | 30.268 | 23.047 | 21.979 |
| H | 31.187 | 23.245 | 21.797 |
| H | 29.889 | 23.888 | 22.238 |
| O | 27.648 | 21.192 | 16.796 |
| H | 27.35  | 20.499 | 16.206 |
| H | 26.861 | 21.705 | 16.979 |
| O | 29.094 | 23.158 | 15.712 |
| H | 28.684 | 22.32  | 15.928 |
| H | 29.846 | 22.923 | 15.168 |
| O | 32.982 | 14.146 | 13.03  |
| H | 33.495 | 13.501 | 12.543 |
| H | 33.138 | 13.931 | 13.95  |
| O | 24.198 | 19.84  | 23.687 |
| H | 24.475 | 20.696 | 23.361 |
| H | 23.265 | 19.795 | 23.477 |
| O | 31.049 | 20.49  | 23.466 |
| H | 31.305 | 20.855 | 22.619 |
| H | 30.106 | 20.348 | 23.391 |
| O | 34.337 | 17.381 | 18.699 |
| H | 33.413 | 17.138 | 18.745 |
| H | 34.589 | 17.193 | 17.794 |
| O | 28.875 | 25.274 | 17.405 |
| H | 29.024 | 24.584 | 16.759 |
| H | 28.96  | 24.832 | 18.25  |
| O | 27.561 | 17.119 | 16.412 |
| H | 27.549 | 17.874 | 15.824 |
| H | 28.209 | 16.527 | 16.028 |
| O | 25.055 | 10.896 | 15.923 |
| H | 24.361 | 10.877 | 15.264 |

|   |        |        |        |
|---|--------|--------|--------|
| H | 25.56  | 10.099 | 15.762 |
| O | 27.663 | 15.508 | 12.777 |
| H | 28.527 | 15.453 | 12.369 |
| H | 27.845 | 15.681 | 13.701 |
| O | 26.642 | 8.919  | 16.155 |
| H | 27.111 | 8.832  | 15.325 |
| H | 27.2   | 8.476  | 16.794 |
| O | 22.286 | 8.889  | 11.272 |
| H | 23.098 | 9.247  | 10.913 |
| H | 22.562 | 8.394  | 12.043 |
| O | 28.183 | 20.556 | 11.69  |
| H | 27.261 | 20.81  | 11.729 |
| H | 28.556 | 21.113 | 11.007 |
| O | 28.184 | 19.383 | 14.719 |
| H | 27.476 | 19.592 | 14.11  |
| H | 28.984 | 19.585 | 14.233 |
| O | 24.872 | 12.144 | 9.43   |
| H | 24.826 | 12.666 | 10.231 |
| H | 23.958 | 11.996 | 9.188  |
| O | 27.915 | 9.266  | 11.271 |
| H | 28.66  | 9.642  | 10.801 |
| H | 28.008 | 8.321  | 11.15  |
| O | 34.216 | 13.143 | 17.637 |
| H | 33.781 | 13.513 | 18.405 |
| H | 33.591 | 12.503 | 17.294 |
| O | 25.355 | 8.517  | 22.306 |
| H | 25.206 | 7.892  | 23.016 |
| H | 26.306 | 8.621  | 22.275 |
| O | 29.441 | 10.867 | 16.12  |
| H | 29.416 | 10.227 | 15.408 |
| H | 28.616 | 11.345 | 16.04  |
| O | 28.552 | 8.795  | 13.93  |
| H | 29.499 | 8.672  | 13.861 |
| H | 28.268 | 8.976  | 13.034 |
| O | 20.485 | 24.189 | 26.946 |
| H | 19.824 | 23.499 | 26.989 |
| H | 20.982 | 24.095 | 27.759 |
| O | 21.841 | 25.67  | 24.919 |
| H | 21.461 | 24.958 | 25.433 |
| H | 22.774 | 25.46  | 24.871 |
| O | 23.943 | 26.468 | 22.389 |
| H | 23.24  | 27.114 | 22.464 |
| H | 23.571 | 25.769 | 21.852 |
| O | 12.238 | 24.196 | 24.379 |
| H | 12.264 | 25.01  | 23.876 |
| H | 13.158 | 23.962 | 24.504 |
| O | 18.176 | 26.857 | 16.936 |

|   |        |        |        |
|---|--------|--------|--------|
| H | 17.888 | 25.989 | 17.218 |
| H | 17.621 | 27.464 | 17.426 |
| O | 13.129 | 20.587 | 24.819 |
| H | 14.035 | 20.781 | 25.059 |
| H | 12.692 | 21.438 | 24.822 |
| O | 8.368  | 24.538 | 22.244 |
| H | 8.26   | 25.485 | 22.33  |
| H | 8.09   | 24.345 | 21.349 |
| O | 14.801 | 26.026 | 20.08  |
| H | 15.168 | 25.155 | 19.923 |
| H | 14.58  | 26.028 | 21.011 |
| O | 16.841 | 21.428 | 19.485 |
| H | 17.664 | 21.307 | 19.96  |
| H | 16.432 | 20.562 | 19.491 |
| O | 14.1   | 25.544 | 16.465 |
| H | 14.254 | 26.406 | 16.851 |
| H | 13.352 | 25.195 | 16.95  |
| O | 10.628 | 21.988 | 23.73  |
| H | 11.119 | 22.808 | 23.678 |
| H | 10.072 | 21.992 | 22.95  |
| O | 26.258 | 25.458 | 17.288 |
| H | 27.206 | 25.532 | 17.392 |
| H | 26.119 | 25.466 | 16.341 |
| O | 17.29  | 27.644 | 20.529 |
| H | 17.728 | 27.128 | 21.207 |
| H | 16.63  | 27.052 | 20.168 |
| O | 12.756 | 16.479 | 24.912 |
| H | 13.482 | 16.7   | 25.496 |
| H | 12.671 | 17.239 | 24.337 |
| O | 16.042 | 14.118 | 27.054 |
| H | 15.404 | 14.757 | 26.737 |
| H | 16.134 | 14.312 | 27.986 |
| O | 16.029 | 25.333 | 26.761 |
| H | 16.951 | 25.579 | 26.679 |
| H | 15.939 | 25.037 | 27.667 |
| O | 11.873 | 17.622 | 29.258 |
| H | 11.424 | 17.928 | 28.469 |
| H | 12.778 | 17.482 | 28.979 |
| O | 23.729 | 23.294 | 23.224 |
| H | 24.058 | 24.189 | 23.134 |
| H | 24.062 | 22.838 | 22.451 |
| O | 16.387 | 20.326 | 30.157 |
| H | 16.358 | 20.609 | 31.071 |
| H | 17.16  | 20.758 | 29.797 |
| O | 21.773 | 16.589 | 28.207 |
| H | 21.965 | 16.894 | 27.32  |
| H | 22.616 | 16.28  | 28.541 |

|   |        |        |        |
|---|--------|--------|--------|
| O | 19.811 | 22.199 | 24.228 |
| H | 20.647 | 22.43  | 24.631 |
| H | 19.187 | 22.198 | 24.953 |
| O | 22.458 | 17.144 | 25.325 |
| H | 22.54  | 16.622 | 24.528 |
| H | 23.125 | 17.825 | 25.235 |
| O | 28.235 | 15.187 | 27.246 |
| H | 28.641 | 15.958 | 27.641 |
| H | 28.357 | 15.307 | 26.304 |
| O | 11.937 | 14.865 | 28.668 |
| H | 11.386 | 14.863 | 27.885 |
| H | 11.646 | 15.632 | 29.162 |
| O | 10.115 | 20.572 | 28.846 |
| H | 9.487  | 20.234 | 29.485 |
| H | 10.295 | 19.828 | 28.271 |
| O | 21.743 | 21.82  | 27.681 |
| H | 22.61  | 21.852 | 27.276 |
| H | 21.234 | 21.243 | 27.112 |
| O | 14.851 | 23.762 | 24.915 |
| H | 15.36  | 24.056 | 24.159 |
| H | 15.232 | 24.231 | 25.657 |
| O | 17.235 | 13.891 | 29.551 |
| H | 16.489 | 13.548 | 30.042 |
| H | 17.465 | 14.704 | 30     |
| O | 12.496 | 18.392 | 23.093 |
| H | 12.583 | 19.222 | 23.562 |
| H | 12.739 | 18.6   | 22.191 |
| O | 13.511 | 21.266 | 28.659 |
| H | 12.659 | 21.659 | 28.471 |
| H | 13.674 | 21.478 | 29.579 |
| O | 9.923  | 17.477 | 27.295 |
| H | 9.111  | 17.051 | 27.568 |
| H | 10.363 | 16.827 | 26.747 |
| O | 10.883 | 14.903 | 26.04  |
| H | 10.417 | 14.692 | 25.231 |
| H | 11.719 | 15.265 | 25.746 |
| O | 13.533 | 12.733 | 28.119 |
| H | 14.455 | 12.946 | 27.977 |
| H | 13.182 | 13.489 | 28.589 |
| O | 23.935 | 13.857 | 27.143 |
| H | 23.268 | 14.002 | 27.814 |
| H | 24.462 | 14.655 | 27.153 |
| O | 11.851 | 12.855 | 23.124 |
| H | 11.658 | 13.712 | 22.744 |
| H | 12.698 | 12.969 | 23.555 |
| O | 10.014 | 20.59  | 26.179 |
| H | 9.549  | 21.152 | 26.799 |



|   |        |        |        |
|---|--------|--------|--------|
| H | 10.185 | 21.155 | 25.426 |
| O | 19.394 | 15.833 | 16.886 |
| H | 20.083 | 16.332 | 17.326 |
| H | 18.978 | 15.332 | 17.587 |
| O | 20.054 | 26.94  | 20.282 |
| H | 19.373 | 27.3   | 19.714 |
| H | 19.839 | 26.01  | 20.354 |
| O | 16.945 | 12.623 | 24.602 |
| H | 16.984 | 12.276 | 23.71  |
| H | 17.651 | 12.172 | 25.065 |
| O | 23.37  | 10.671 | 13.931 |
| H | 22.71  | 9.994  | 14.082 |
| H | 22.878 | 11.41  | 13.574 |
| O | 15.044 | 14.239 | 14.849 |
| H | 14.889 | 15.184 | 14.839 |
| H | 15.803 | 14.127 | 15.421 |
| O | 17.468 | 17.185 | 14.984 |
| H | 17.92  | 16.542 | 15.53  |
| H | 16.609 | 17.286 | 15.394 |
| O | 14.403 | 16.848 | 15.969 |
| H | 13.948 | 17.67  | 16.154 |
| H | 14.21  | 16.292 | 16.723 |
| O | 15.941 | 22.78  | 28.839 |
| H | 15.971 | 22.046 | 29.452 |
| H | 16.454 | 23.468 | 29.264 |
| O | 18.419 | 5.694  | 17.961 |
| H | 17.904 | 5.222  | 17.306 |
| H | 19.284 | 5.287  | 17.924 |
| O | 25.06  | 21.993 | 21.145 |
| H | 25.996 | 22.109 | 20.98  |
| H | 24.83  | 21.197 | 20.666 |
| O | 29.628 | 17.598 | 10.714 |
| H | 29.801 | 18.391 | 11.222 |
| H | 30.054 | 16.899 | 11.21  |
| O | 17.57  | 13.249 | 16.234 |
| H | 18.437 | 13.654 | 16.246 |
| H | 17.195 | 13.459 | 17.089 |
| O | 15.28  | 15.817 | 12.454 |
| H | 14.861 | 15.48  | 11.662 |
| H | 15.297 | 15.07  | 13.052 |
| O | 21.627 | 12.663 | 13.231 |
| H | 21.25  | 12.924 | 14.071 |
| H | 21.47  | 13.412 | 12.655 |
| O | 17.755 | 15.73  | 25.649 |
| H | 18.607 | 15.4   | 25.932 |
| H | 17.126 | 15.092 | 25.988 |
| O | 18.731 | 22.555 | 17.426 |

|   |        |        |        |
|---|--------|--------|--------|
| H | 17.984 | 22.738 | 16.856 |
| H | 18.404 | 22.718 | 18.31  |
| O | 14.368 | 13.467 | 21.096 |
| H | 14.669 | 14.215 | 21.613 |
| H | 14.139 | 13.841 | 20.245 |
| O | 22.909 | 23.677 | 16.692 |
| H | 22.302 | 24.379 | 16.929 |
| H | 22.394 | 22.875 | 16.78  |
| O | 22.343 | 26.264 | 13.759 |
| H | 21.624 | 26.451 | 13.154 |
| H | 22.138 | 26.778 | 14.54  |
| O | 8.898  | 18.427 | 15.597 |
| H | 9.56   | 19.004 | 15.215 |
| H | 8.079  | 18.693 | 15.179 |
| O | 11.489 | 21.897 | 12.634 |
| H | 12.403 | 21.614 | 12.659 |
| H | 11.531 | 22.85  | 12.711 |
| O | 21.335 | 19.709 | 23.292 |
| H | 20.775 | 20.422 | 23.599 |
| H | 20.725 | 19.007 | 23.064 |
| O | 13.262 | 26.321 | 13.77  |
| H | 13.79  | 27.004 | 14.183 |
| H | 13.563 | 25.508 | 14.176 |
| O | 25.524 | 21.135 | 12.809 |
| H | 25.102 | 20.588 | 12.146 |
| H | 25.298 | 22.031 | 12.559 |
| O | 19.293 | 13.239 | 27.628 |
| H | 18.729 | 13.63  | 28.295 |
| H | 20.128 | 13.096 | 28.074 |
| O | 11.386 | 16.902 | 19.667 |
| H | 10.675 | 17.357 | 19.216 |
| H | 11.773 | 17.567 | 20.236 |
| O | 14.224 | 10.457 | 25.473 |
| H | 13.675 | 10.076 | 24.788 |
| H | 13.607 | 10.898 | 26.057 |
| O | 27.741 | 16.05  | 24.581 |
| H | 26.823 | 16.164 | 24.335 |
| H | 28.205 | 16.731 | 24.094 |
| O | 15.712 | 18.646 | 24.882 |
| H | 16.604 | 18.442 | 24.598 |
| H | 15.821 | 19.333 | 25.539 |
| O | 18.883 | 6.511  | 14.197 |
| H | 19.033 | 5.952  | 14.959 |
| H | 19.752 | 6.635  | 13.816 |
| O | 24.681 | 20.073 | 14.961 |
| H | 23.846 | 20.534 | 15.05  |
| H | 25.116 | 20.506 | 14.227 |

|   |        |        |        |
|---|--------|--------|--------|
| O | 18.261 | 22.005 | 26.323 |
| H | 17.341 | 22.148 | 26.101 |
| H | 18.241 | 21.652 | 27.212 |
| O | 15.03  | 16.584 | 26.547 |
| H | 15.496 | 17.223 | 26.006 |
| H | 14.873 | 17.039 | 27.374 |
| O | 19.257 | 18.968 | 27.196 |
| H | 19.113 | 18.833 | 26.259 |
| H | 19.164 | 18.097 | 27.581 |
| O | 13.242 | 15.061 | 18.782 |
| H | 12.414 | 14.723 | 18.441 |
| H | 13.003 | 15.872 | 19.231 |
| O | 18.487 | 11.278 | 13.645 |
| H | 18.181 | 11.915 | 13     |
| H | 18.748 | 11.807 | 14.399 |
| O | 16.854 | 8.504  | 19.286 |
| H | 17.512 | 8.476  | 19.98  |
| H | 16.016 | 8.472  | 19.748 |
| O | 14.272 | 18.25  | 13.393 |
| H | 14.767 | 17.467 | 13.154 |
| H | 13.532 | 18.261 | 12.786 |
| O | 21.4   | 11.534 | 24.354 |
| H | 22.108 | 10.945 | 24.616 |
| H | 21.833 | 12.373 | 24.195 |
| O | 14.464 | 18.51  | 28.583 |
| H | 13.694 | 19.017 | 28.328 |
| H | 14.964 | 19.1   | 29.147 |
| O | 13.277 | 19.405 | 15.875 |
| H | 13.618 | 19.224 | 14.999 |
| H | 13.859 | 20.078 | 16.225 |
| O | 15.771 | 14.127 | 18.118 |
| H | 16.154 | 14.342 | 18.969 |
| H | 14.88  | 14.475 | 18.163 |
| O | 14.25  | 22.462 | 13.34  |
| H | 14.147 | 22.425 | 12.389 |
| H | 15.019 | 23.016 | 13.476 |
| O | 22.076 | 9.108  | 15.841 |
| H | 22.533 | 9.041  | 16.68  |
| H | 21.422 | 9.793  | 15.978 |
| O | 24.223 | 17.423 | 14.731 |
| H | 23.553 | 17.297 | 15.402 |
| H | 24.473 | 18.344 | 14.812 |
| O | 6.718  | 15.743 | 20.562 |
| H | 6.749  | 16.374 | 21.281 |
| H | 7.498  | 15.202 | 20.685 |
| O | 27.991 | 19.053 | 24.709 |
| H | 27.83  | 19.759 | 24.083 |

|   |        |        |        |
|---|--------|--------|--------|
| H | 27.119 | 18.729 | 24.934 |
| O | 25.571 | 16.088 | 26.879 |
| H | 25.369 | 16.91  | 26.432 |
| H | 26.523 | 16.094 | 26.975 |
| O | 24.569 | 19.77  | 10.825 |
| H | 23.627 | 19.909 | 10.921 |
| H | 24.689 | 18.832 | 10.973 |
| O | 21.065 | 25.826 | 17.148 |
| H | 21.323 | 26.57  | 17.693 |
| H | 20.241 | 26.1   | 16.744 |
| O | 7.429  | 14.828 | 14.904 |
| H | 7.2    | 14.177 | 14.241 |
| H | 8.385  | 14.873 | 14.875 |
| O | 19.662 | 19.241 | 14.753 |
| H | 19.241 | 19.991 | 14.332 |
| H | 18.958 | 18.601 | 14.862 |
| O | 25.015 | 25.077 | 25.389 |
| H | 24.909 | 25.396 | 26.285 |
| H | 25.954 | 25.154 | 25.217 |
| O | 15.648 | 10.447 | 15.077 |
| H | 15.635 | 9.705  | 15.681 |
| H | 16.538 | 10.456 | 14.726 |
| O | 24.255 | 22.071 | 26.165 |
| H | 25.154 | 22.104 | 25.836 |
| H | 23.727 | 22.436 | 25.455 |
| O | 19.663 | 25.389 | 12.536 |
| H | 19.505 | 26.136 | 13.115 |
| H | 19.449 | 25.714 | 11.662 |
| O | 22.74  | 15.438 | 22.947 |
| H | 23.517 | 15.344 | 22.397 |
| H | 22.671 | 14.602 | 23.409 |
| O | 14.287 | 21.072 | 10.769 |
| H | 15.146 | 20.653 | 10.73  |
| H | 14.247 | 21.611 | 9.979  |
| O | 22.303 | 16.254 | 11.052 |
| H | 23.249 | 16.2   | 11.189 |
| H | 21.924 | 15.914 | 11.862 |
| O | 16.339 | 23.922 | 16.134 |
| H | 16.628 | 24.337 | 15.322 |
| H | 15.499 | 24.337 | 16.33  |
| O | 21.65  | 19.95  | 11.103 |
| H | 21.479 | 19.292 | 11.777 |
| H | 21.353 | 20.773 | 11.491 |
| O | 16.783 | 20.269 | 14.756 |
| H | 16.29  | 20.474 | 15.55  |
| H | 16.349 | 19.496 | 14.397 |
| O | 20.451 | 13.255 | 15.701 |

|   |        |        |        |
|---|--------|--------|--------|
| H | 20.65  | 13.928 | 16.352 |
| H | 20.389 | 12.444 | 16.206 |
| O | 24.977 | 13.027 | 11.868 |
| H | 25.252 | 12.3   | 12.426 |
| H | 24.624 | 13.676 | 12.477 |
| O | 18.644 | 13.758 | 12.463 |
| H | 18.538 | 14.559 | 12.976 |
| H | 18.746 | 14.063 | 11.561 |
| O | 16.501 | 15.419 | 20.562 |
| H | 16.026 | 15.502 | 21.388 |
| H | 16.832 | 16.3   | 20.386 |
| O | 27.658 | 10.103 | 21.625 |
| H | 28.235 | 10.275 | 20.881 |
| H | 27.592 | 10.945 | 22.077 |
| O | 25.356 | 22.448 | 17.363 |
| H | 25.957 | 23.193 | 17.351 |
| H | 24.51  | 22.82  | 17.113 |
| O | 24.968 | 14.88  | 21.457 |
| H | 25.063 | 13.947 | 21.268 |
| H | 24.656 | 15.261 | 20.636 |
| O | 16.794 | 19.565 | 10.797 |
| H | 16.91  | 18.774 | 11.323 |
| H | 17.268 | 20.244 | 11.278 |
| O | 9.428  | 18.475 | 18.235 |
| H | 8.496  | 18.538 | 18.445 |
| H | 9.453  | 18.386 | 17.282 |
| O | 21.547 | 23.357 | 21.133 |
| H | 22.255 | 23.657 | 20.563 |
| H | 21.957 | 23.253 | 21.991 |
| O | 16.011 | 17.212 | 31.043 |
| H | 15.317 | 17.042 | 30.406 |
| H | 16.788 | 17.379 | 30.51  |
| O | 24.396 | 23.347 | 12.071 |
| H | 24.119 | 24.109 | 11.562 |
| H | 23.629 | 23.12  | 12.597 |
| O | 9.908  | 17.41  | 23.452 |
| H | 10.793 | 17.759 | 23.344 |
| H | 9.347  | 18.185 | 23.484 |
| O | 15.072 | 21.246 | 16.941 |
| H | 15.033 | 21.149 | 17.893 |
| H | 15.506 | 22.088 | 16.804 |
| O | 17.755 | 17.448 | 12.332 |
| H | 18.247 | 17.413 | 13.152 |
| H | 16.93  | 17.005 | 12.528 |
| O | 16.921 | 23.022 | 22.968 |
| H | 16.499 | 23.164 | 22.121 |
| H | 17.771 | 22.638 | 22.751 |

|   |        |        |        |
|---|--------|--------|--------|
| O | 8.472  | 19.84  | 23.852 |
| H | 8.277  | 20.697 | 23.474 |
| H | 8.95   | 20.037 | 24.658 |
| O | 17.786 | 21.334 | 12.658 |
| H | 17.278 | 22.145 | 12.626 |
| H | 17.52  | 20.917 | 13.477 |
| O | 11.65  | 21.466 | 19.131 |
| H | 12.012 | 20.691 | 18.703 |
| H | 11.042 | 21.833 | 18.489 |
| O | 25.465 | 16.898 | 23.713 |
| H | 25.257 | 16.216 | 23.076 |
| H | 24.796 | 17.568 | 23.574 |
| O | 25.204 | 18.77  | 26.226 |
| H | 24.96  | 19.407 | 25.555 |
| H | 24.691 | 19.022 | 26.994 |
| O | 17.469 | 25.759 | 23.544 |
| H | 17.553 | 24.829 | 23.332 |
| H | 18.056 | 25.889 | 24.288 |
| O | 14.927 | 15.308 | 22.925 |
| H | 14.754 | 14.585 | 23.528 |
| H | 14.552 | 16.075 | 23.358 |
| O | 27.736 | 17.219 | 19.315 |
| H | 27.382 | 17.243 | 18.426 |
| H | 27.865 | 16.288 | 19.496 |
| O | 14.371 | 13.497 | 24.665 |
| H | 13.969 | 12.678 | 24.955 |
| H | 15.312 | 13.331 | 24.71  |
| O | 19.094 | 11.327 | 25.729 |
| H | 19.08  | 11.87  | 26.518 |
| H | 19.942 | 11.511 | 25.326 |
| O | 20.257 | 22.752 | 12.421 |
| H | 19.441 | 22.302 | 12.202 |
| H | 19.999 | 23.665 | 12.552 |
| O | 16.52  | 23.984 | 12.622 |
| H | 16.125 | 24.529 | 11.941 |
| H | 17.05  | 24.593 | 13.138 |
| O | 21.31  | 21.552 | 17.118 |
| H | 20.371 | 21.738 | 17.095 |
| H | 21.367 | 20.637 | 17.392 |
| O | 26.912 | 22.294 | 24.819 |
| H | 27.582 | 22.928 | 25.074 |
| H | 27.283 | 21.845 | 24.059 |
| O | 28.098 | 12.063 | 12.714 |
| H | 28.49  | 12.491 | 11.953 |
| H | 27.572 | 11.353 | 12.345 |
| O | 20.386 | 16.855 | 22.874 |
| H | 19.688 | 16.2   | 22.901 |

|   |        |        |        |
|---|--------|--------|--------|
| H | 21.169 | 16.361 | 22.63  |
| O | 20.219 | 17.398 | 9.613  |
| H | 21.062 | 17.358 | 10.063 |
| H | 19.753 | 16.615 | 9.906  |
| O | 16.815 | 12.151 | 21.77  |
| H | 15.968 | 12.574 | 21.625 |
| H | 17.118 | 11.915 | 20.894 |
| O | 23.346 | 13.405 | 24.485 |
| H | 23.579 | 13.548 | 25.403 |
| H | 24.171 | 13.162 | 24.065 |
| O | 8.414  | 13.815 | 22.047 |
| H | 8.693  | 12.915 | 21.88  |
| H | 9.23   | 14.309 | 22.122 |
| O | 27.268 | 12.771 | 15.442 |
| H | 26.34  | 12.54  | 15.396 |
| H | 27.646 | 12.406 | 14.643 |
| O | 20.594 | 10.31  | 22.154 |
| H | 21.357 | 9.739  | 22.06  |
| H | 20.755 | 10.793 | 22.965 |
| O | 23.224 | 6.175  | 17.644 |
| H | 23.777 | 6.187  | 16.863 |
| H | 22.995 | 7.093  | 17.788 |
| O | 19.409 | 24.33  | 19.467 |
| H | 20.177 | 23.984 | 19.922 |
| H | 19.523 | 24.05  | 18.559 |
| O | 15.15  | 23.322 | 20.352 |
| H | 15.685 | 22.545 | 20.191 |
| H | 14.359 | 22.986 | 20.773 |
| O | 22.52  | 22.091 | 13.856 |
| H | 21.633 | 22.215 | 13.52  |
| H | 22.443 | 22.242 | 14.798 |
| O | 18.279 | 15.065 | 22.961 |
| H | 17.794 | 15.164 | 23.781 |
| H | 17.829 | 14.357 | 22.501 |
| O | 15.927 | 8.033  | 16.597 |
| H | 15.802 | 7.089  | 16.502 |
| H | 16.391 | 8.13   | 17.429 |
| O | 28.018 | 22.874 | 19.665 |
| H | 27.946 | 21.926 | 19.553 |
| H | 28.904 | 23.008 | 20.002 |
| O | 17.628 | 25.957 | 14.337 |
| H | 17.759 | 26.13  | 15.27  |
| H | 18.137 | 26.635 | 13.894 |
| O | 18.629 | 18.047 | 24.495 |
| H | 19.425 | 17.798 | 24.027 |
| H | 18.252 | 17.217 | 24.786 |
| O | 19.091 | 21.702 | 21.61  |

|   |        |        |        |
|---|--------|--------|--------|
| H | 19.893 | 21.913 | 21.132 |
| H | 19.386 | 21.511 | 22.501 |
| O | 23.917 | 24.227 | 20.046 |
| H | 24.379 | 23.451 | 20.363 |
| H | 24.368 | 24.46  | 19.235 |
| O | 21.055 | 15.483 | 13.922 |
| H | 20.52  | 14.923 | 14.484 |
| H | 21.497 | 16.077 | 14.529 |
| O | 24.222 | 10.565 | 18.262 |
| H | 24.868 | 9.939  | 18.589 |
| H | 24.551 | 10.82  | 17.4   |
| O | 25.046 | 11.998 | 21.977 |
| H | 25.844 | 12.043 | 22.503 |
| H | 24.907 | 11.062 | 21.832 |
| O | 10.185 | 19.902 | 11.363 |
| H | 10.681 | 20.668 | 11.651 |
| H | 9.446  | 19.854 | 11.969 |
| O | 20.387 | 10.75  | 11.029 |
| H | 20.686 | 11.237 | 11.797 |
| H | 21.093 | 10.129 | 10.849 |
| O | 21.753 | 14.324 | 8.707  |
| H | 21.991 | 14.935 | 9.404  |
| H | 22.481 | 14.373 | 8.087  |
| O | 19.101 | 14.65  | 9.853  |
| H | 18.31  | 14.349 | 9.407  |
| H | 19.813 | 14.432 | 9.253  |
| O | 15.175 | 18.744 | 8.697  |
| H | 15.753 | 18.867 | 9.45   |
| H | 15.604 | 18.066 | 8.174  |
| O | 24.633 | 24.894 | 15.023 |
| H | 24.047 | 24.343 | 15.542 |
| H | 24.047 | 25.426 | 14.484 |
| O | 27.14  | 14.032 | 10.141 |
| H | 26.858 | 14.497 | 10.93  |
| H | 26.466 | 13.368 | 10.001 |
| O | 26.89  | 17.52  | 9.823  |
| H | 26.255 | 17.894 | 10.434 |
| H | 27.67  | 17.362 | 10.355 |
| O | 8.073  | 19.293 | 12.916 |
| H | 7.339  | 19.82  | 13.231 |
| H | 7.831  | 18.392 | 13.131 |
| O | 18.504 | 19.38  | 8.678  |
| H | 17.977 | 19.426 | 9.475  |
| H | 19.214 | 18.775 | 8.895  |
| O | 22.582 | 8.671  | 21.629 |
| H | 22.293 | 7.763  | 21.724 |
| H | 23.441 | 8.695  | 22.051 |



|   |        |        |        |
|---|--------|--------|--------|
| O | 19.672 | 12.13  | 20.083 |
| H | 18.909 | 11.736 | 19.661 |
| H | 19.929 | 11.496 | 20.753 |
| O | 25.745 | 8.456  | 19.464 |
| H | 26.1   | 7.602  | 19.219 |
| H | 25.767 | 8.46   | 20.421 |
| O | 24.821 | 6.199  | 15.508 |
| H | 25.311 | 5.466  | 15.136 |
| H | 25.487 | 6.86   | 15.697 |
| O | 20.735 | 10.817 | 17.859 |
| H | 21.253 | 10.076 | 18.174 |
| H | 20.533 | 11.319 | 18.649 |
| O | 22.777 | 7.188  | 13.749 |
| H | 23.243 | 6.495  | 14.218 |
| H | 22.565 | 7.833  | 14.424 |
| O | 22.325 | 8.632  | 18.507 |
| H | 23.08  | 9.21   | 18.608 |
| H | 21.889 | 8.655  | 19.359 |
| O | 23.142 | 5.674  | 20.23  |
| H | 23.876 | 6.209  | 20.531 |
| H | 23.16  | 5.756  | 19.277 |
| O | 17.461 | 8.619  | 13.175 |
| H | 17.91  | 8.001  | 13.751 |
| H | 17.992 | 9.414  | 13.216 |
| O | 16.549 | 9.056  | 23.942 |
| H | 17.251 | 8.693  | 24.482 |
| H | 16.269 | 9.842  | 24.409 |
| O | 19.849 | 6.507  | 22.403 |
| H | 19.182 | 7.037  | 21.965 |
| H | 19.777 | 5.645  | 21.994 |
| O | 13.207 | 10.901 | 16.462 |
| H | 13.966 | 10.894 | 15.878 |
| H | 12.945 | 9.983  | 16.526 |
| O | 23.406 | 10.236 | 25.781 |
| H | 23.432 | 9.436  | 26.307 |
| H | 24.233 | 10.677 | 25.974 |
| O | 24.848 | 9.495  | 10.383 |
| H | 24.994 | 10.398 | 10.1   |
| H | 25.694 | 9.213  | 10.73  |
| O | 18.294 | 8.698  | 21.634 |
| H | 19.002 | 9.278  | 21.914 |
| H | 17.596 | 8.848  | 22.271 |
| O | 27.262 | 11.494 | 24.43  |
| H | 26.724 | 11.713 | 25.191 |
| H | 27.418 | 10.553 | 24.51  |
| O | 18.636 | 14.472 | 19.061 |
| H | 19.069 | 13.674 | 19.365 |

|   |        |        |        |
|---|--------|--------|--------|
| H | 18.005 | 14.68  | 19.751 |
| O | 26.295 | 5.941  | 18.23  |
| H | 25.431 | 5.529  | 18.237 |
| H | 26.908 | 5.213  | 18.332 |
| O | 17.242 | 11.293 | 18.992 |
| H | 17.164 | 10.418 | 18.613 |
| H | 16.411 | 11.72  | 18.781 |
| O | 24.303 | 15.474 | 8.769  |
| H | 24.325 | 16.277 | 8.249  |
| H | 25.183 | 15.403 | 9.137  |
| O | 10.345 | 24.772 | 26.483 |
| H | 10.794 | 24.263 | 25.808 |
| H | 11.047 | 25.231 | 26.943 |
| O | 11.233 | 24.062 | 21.261 |
| H | 10.486 | 23.476 | 21.134 |
| H | 11.931 | 23.493 | 21.584 |
| O | 11.536 | 26.417 | 22.465 |
| H | 10.698 | 26.726 | 22.807 |
| H | 11.308 | 25.667 | 21.915 |
| O | 7.57   | 23.724 | 19.557 |
| H | 6.861  | 23.086 | 19.479 |
| H | 7.503  | 24.255 | 18.763 |
| O | 9.281  | 21.829 | 21.265 |
| H | 8.698  | 22.45  | 20.829 |
| H | 9.496  | 21.187 | 20.588 |
| O | 19.124 | 16.275 | 29.635 |
| H | 19.402 | 15.702 | 30.349 |
| H | 19.934 | 16.501 | 29.179 |
| O | 10.627 | 16.069 | 14.79  |
| H | 10.043 | 16.794 | 15.01  |
| H | 11.485 | 16.478 | 14.678 |
| O | 5.269  | 16.773 | 17.728 |
| H | 5.056  | 17.109 | 16.857 |
| H | 5.421  | 15.838 | 17.593 |
| O | 6.669  | 17.421 | 14.285 |
| H | 5.782  | 17.404 | 14.643 |
| H | 7.076  | 16.619 | 14.614 |
| O | 6.793  | 20.993 | 16.992 |
| H | 7.708  | 21.26  | 17.083 |
| H | 6.708  | 20.232 | 17.566 |
| O | 10.889 | 20.232 | 15.06  |
| H | 10.994 | 20.785 | 14.286 |
| H | 11.766 | 20.18  | 15.439 |
| O | 10.311 | 13.591 | 14.341 |
| H | 11.167 | 13.391 | 13.961 |
| H | 10.27  | 14.547 | 14.347 |
| O | 15.493 | 21.324 | 26.146 |

|   |        |        |        |
|---|--------|--------|--------|
| H | 15.28  | 22.159 | 25.728 |
| H | 15.233 | 21.441 | 27.059 |
| O | 9.923  | 11.473 | 21.452 |
| H | 10.413 | 11.212 | 20.673 |
| H | 10.595 | 11.737 | 22.08  |
| O | 9.436  | 21.342 | 17.242 |
| H | 9.867  | 22.169 | 17.025 |
| H | 9.86   | 20.696 | 16.678 |
| O | 12.158 | 18.656 | 26.6   |
| H | 11.225 | 18.793 | 26.439 |
| H | 12.596 | 19.249 | 25.989 |
| O | 10.421 | 24.811 | 14.196 |
| H | 10.087 | 25.32  | 13.456 |
| H | 11.367 | 24.955 | 14.177 |
| O | 13.184 | 21.666 | 21.343 |
| H | 13.397 | 20.762 | 21.574 |
| H | 12.751 | 21.6   | 20.492 |
| O | 8.511  | 15.399 | 24.713 |
| H | 8.957  | 16.163 | 24.349 |
| H | 7.882  | 15.144 | 24.038 |
| O | 8.856  | 11.454 | 17.814 |
| H | 9.752  | 11.453 | 18.151 |
| H | 8.62   | 12.381 | 17.765 |
| O | 11.364 | 11.877 | 18.304 |
| H | 11.246 | 12.788 | 18.033 |
| H | 12.181 | 11.607 | 17.884 |
| O | 11.853 | 25.183 | 18.281 |
| H | 11.887 | 24.91  | 19.198 |
| H | 11.671 | 26.122 | 18.318 |
| O | 5.727  | 16.408 | 23.623 |
| H | 4.838  | 16.737 | 23.752 |
| H | 6.176  | 16.598 | 24.447 |
| O | 13.069 | 12.808 | 13.633 |
| H | 13.689 | 12.119 | 13.395 |
| H | 13.468 | 13.241 | 14.388 |
| O | 6.632  | 18.898 | 19.134 |
| H | 6.882  | 18.464 | 19.949 |
| H | 6.162  | 18.226 | 18.64  |
| O | 10.827 | 15.006 | 21.802 |
| H | 11.27  | 15.512 | 21.121 |
| H | 10.502 | 15.664 | 22.417 |
| O | 11.4   | 11.911 | 26.723 |
| H | 12.157 | 12.312 | 27.149 |
| H | 11.041 | 12.605 | 26.17  |
| O | 11.083 | 14.387 | 17.521 |
| H | 10.829 | 15.24  | 17.873 |
| H | 11.042 | 14.498 | 16.572 |

|   |        |        |        |
|---|--------|--------|--------|
| O | 13.664 | 10.862 | 21.141 |
| H | 13.498 | 10.818 | 20.199 |
| H | 13.795 | 11.794 | 21.317 |
| O | 10.412 | 23.596 | 16.652 |
| H | 10.728 | 24.219 | 17.306 |
| H | 10.385 | 24.097 | 15.837 |
| O | 7.234  | 18.164 | 22.144 |
| H | 7.628  | 18.837 | 22.698 |
| H | 6.779  | 17.586 | 22.756 |
| O | 5.391  | 21.911 | 19.72  |
| H | 5.166  | 21.406 | 20.501 |
| H | 5.839  | 21.286 | 19.15  |
| O | 12.741 | 18.302 | 11.121 |
| H | 11.822 | 18.561 | 11.053 |
| H | 13.228 | 19.063 | 10.804 |
| O | 8.687  | 16.129 | 12.3   |
| H | 8.632  | 16.325 | 11.364 |
| H | 8.437  | 15.207 | 12.366 |
| O | 14.027 | 13.954 | 10.726 |
| H | 13.286 | 14.48  | 10.426 |
| H | 13.64  | 13.308 | 11.316 |

**Table S14. PYP chromophore + 311 waters**

| Method    | Time(s) | iterations | E(eV) | f   |
|-----------|---------|------------|-------|-----|
| CIS       | 656.3   | 12         | 3.65  | 1.6 |
| TD-BLYP   | -       | -          | -     | -   |
| TD-B3LYP* | 266.9   | 2          | 0.60  | 0.0 |

\*residual converged to only 0.0006

|   |        |        |        |
|---|--------|--------|--------|
| C | 22.967 | 16.81  | 19.507 |
| C | 24.27  | 16.774 | 18.931 |
| C | 24.617 | 15.671 | 18.139 |
| C | 23.681 | 14.66  | 17.949 |
| C | 22.419 | 14.608 | 18.558 |
| C | 22.092 | 15.731 | 19.368 |
| S | 22.3   | 18.226 | 20.373 |
| C | 21.107 | 18.737 | 19.24  |
| C | 19.881 | 18.611 | 19.724 |
| O | 21.503 | 18.978 | 18.056 |
| C | 18.678 | 18.857 | 18.895 |
| C | 17.412 | 18.7   | 19.379 |
| C | 16.267 | 18.768 | 18.424 |
| C | 15.007 | 18.753 | 18.949 |
| C | 14.627 | 18.622 | 20.339 |
| C | 15.744 | 18.498 | 21.241 |
| C | 17.075 | 18.511 | 20.793 |
| O | 13.416 | 18.649 | 20.62  |
| H | 25.016 | 17.532 | 19.156 |
| H | 25.561 | 15.727 | 17.603 |
| H | 23.959 | 13.891 | 17.234 |
| H | 21.774 | 13.742 | 18.433 |
| H | 21.138 | 15.665 | 19.885 |
| H | 19.762 | 18.159 | 20.708 |
| H | 18.901 | 19.227 | 17.895 |
| H | 16.528 | 18.974 | 17.391 |
| H | 14.139 | 18.825 | 18.303 |
| H | 15.6   | 18.345 | 22.305 |
| H | 17.886 | 18.502 | 21.514 |
| O | 29.182 | 25.39  | 22.779 |
| H | 29.281 | 25.376 | 23.731 |
| H | 28.342 | 25.825 | 22.632 |
| O | 30.112 | 21.211 | 18.047 |
| H | 30.308 | 22.125 | 18.252 |
| H | 29.292 | 21.246 | 17.554 |
| O | 24.075 | 15.499 | 29.422 |
| H | 24.789 | 14.887 | 29.603 |
| H | 23.281 | 15.008 | 29.631 |
| O | 28.391 | 13.11  | 22.223 |
| H | 29.252 | 12.971 | 21.829 |

|   |        |        |        |
|---|--------|--------|--------|
| H | 28.33  | 12.444 | 22.907 |
| O | 29.307 | 17.709 | 27.704 |
| H | 30.224 | 17.766 | 27.973 |
| H | 29.295 | 18.067 | 26.817 |
| O | 24.938 | 16.847 | 11.925 |
| H | 24.601 | 17.235 | 12.732 |
| H | 25.689 | 16.325 | 12.206 |
| O | 32.469 | 14.752 | 21.385 |
| H | 33.348 | 14.759 | 21.766 |
| H | 32.195 | 13.836 | 21.431 |
| O | 30.816 | 19.132 | 13.418 |
| H | 30.974 | 18.346 | 13.94  |
| H | 31.54  | 19.153 | 12.792 |
| O | 30.284 | 15.257 | 11.884 |
| H | 31.234 | 15.279 | 11.994 |
| H | 30.077 | 14.33  | 11.768 |
| O | 32.263 | 11.353 | 17.063 |
| H | 32.41  | 10.514 | 17.499 |
| H | 31.311 | 11.441 | 17.027 |
| O | 33.28  | 18.588 | 15.193 |
| H | 33.815 | 17.822 | 15.401 |
| H | 32.532 | 18.235 | 14.713 |
| O | 26.315 | 12.269 | 19.428 |
| H | 25.586 | 12.142 | 20.035 |
| H | 26.005 | 11.901 | 18.601 |
| O | 29.689 | 10.354 | 19.041 |
| H | 30.009 | 9.628  | 18.504 |
| H | 28.925 | 10.684 | 18.568 |
| O | 31.465 | 16.672 | 14.469 |
| H | 32.168 | 16.029 | 14.378 |
| H | 30.721 | 16.168 | 14.799 |
| O | 30.751 | 18.966 | 19.536 |
| H | 30.85  | 19.768 | 19.022 |
| H | 29.824 | 18.742 | 19.454 |
| O | 21.624 | 17.545 | 15.698 |
| H | 21.844 | 17.862 | 16.574 |
| H | 21.068 | 18.23  | 15.328 |
| O | 27.301 | 20.143 | 19.909 |
| H | 26.457 | 20.142 | 19.458 |
| H | 27.68  | 19.287 | 19.713 |
| O | 32.002 | 10.998 | 22.33  |
| H | 32.425 | 10.517 | 21.619 |
| H | 31.574 | 11.737 | 21.899 |
| O | 29.855 | 14.696 | 24.663 |
| H | 29.947 | 14.331 | 23.783 |
| H | 29.069 | 15.241 | 24.615 |
| O | 31.889 | 16.56  | 19.452 |

|   |        |        |        |
|---|--------|--------|--------|
| H | 32.012 | 16.092 | 20.278 |
| H | 31.432 | 17.364 | 19.699 |
| O | 27.763 | 8.742  | 24.655 |
| H | 27.349 | 7.971  | 25.04  |
| H | 28.329 | 8.392  | 23.967 |
| O | 30.544 | 12.556 | 20.427 |
| H | 30.218 | 11.819 | 19.909 |
| H | 30.792 | 13.214 | 19.777 |
| O | 32.612 | 20.608 | 17.136 |
| H | 31.709 | 20.388 | 17.362 |
| H | 32.89  | 19.906 | 16.547 |
| O | 28.345 | 21.116 | 22.423 |
| H | 29.083 | 21.585 | 22.033 |
| H | 27.883 | 20.733 | 21.678 |
| O | 28.626 | 7.578  | 18.14  |
| H | 29.131 | 7.399  | 18.934 |
| H | 27.944 | 6.906  | 18.134 |
| O | 34.025 | 19.389 | 20.825 |
| H | 33.18  | 19.249 | 21.253 |
| H | 33.999 | 18.825 | 20.053 |
| O | 24.737 | 20.209 | 19.019 |
| H | 24.671 | 20.885 | 18.345 |
| H | 23.926 | 19.706 | 18.934 |
| O | 24.407 | 14.872 | 14.057 |
| H | 23.679 | 14.548 | 14.587 |
| H | 24.691 | 15.67  | 14.502 |
| O | 27.84  | 14.376 | 19.85  |
| H | 27.952 | 14.292 | 20.797 |
| H | 27.401 | 13.566 | 19.588 |
| O | 29.304 | 15.125 | 15.496 |
| H | 29.712 | 15.071 | 16.36  |
| H | 28.974 | 14.241 | 15.332 |
| O | 30.935 | 23.768 | 18.813 |
| H | 31.045 | 24.586 | 19.299 |
| H | 31.712 | 23.253 | 19.032 |
| O | 30.88  | 7.56   | 16.768 |
| H | 29.99  | 7.73   | 17.076 |
| H | 30.996 | 6.616  | 16.879 |
| O | 30.268 | 23.047 | 21.979 |
| H | 31.187 | 23.245 | 21.797 |
| H | 29.889 | 23.888 | 22.238 |
| O | 27.648 | 21.192 | 16.796 |
| H | 27.35  | 20.499 | 16.206 |
| H | 26.861 | 21.705 | 16.979 |
| O | 29.094 | 23.158 | 15.712 |
| H | 28.684 | 22.32  | 15.928 |
| H | 29.846 | 22.923 | 15.168 |

|   |        |        |        |
|---|--------|--------|--------|
| O | 32.982 | 14.146 | 13.03  |
| H | 33.495 | 13.501 | 12.543 |
| H | 33.138 | 13.931 | 13.95  |
| O | 24.198 | 19.84  | 23.687 |
| H | 24.475 | 20.696 | 23.361 |
| H | 23.265 | 19.795 | 23.477 |
| O | 31.049 | 20.49  | 23.466 |
| H | 31.305 | 20.855 | 22.619 |
| H | 30.106 | 20.348 | 23.391 |
| O | 33.02  | 19.355 | 24.959 |
| H | 32.359 | 19.651 | 24.333 |
| H | 32.922 | 18.403 | 24.978 |
| O | 34.337 | 17.381 | 18.699 |
| H | 33.413 | 17.138 | 18.745 |
| H | 34.589 | 17.193 | 17.794 |
| O | 28.875 | 25.274 | 17.405 |
| H | 29.024 | 24.584 | 16.759 |
| H | 28.96  | 24.832 | 18.25  |
| O | 27.561 | 17.119 | 16.412 |
| H | 27.549 | 17.874 | 15.824 |
| H | 28.209 | 16.527 | 16.028 |
| O | 25.055 | 10.896 | 15.923 |
| H | 24.361 | 10.877 | 15.264 |
| H | 25.56  | 10.099 | 15.762 |
| O | 27.663 | 15.508 | 12.777 |
| H | 28.527 | 15.453 | 12.369 |
| H | 27.845 | 15.681 | 13.701 |
| O | 26.642 | 8.919  | 16.155 |
| H | 27.111 | 8.832  | 15.325 |
| H | 27.2   | 8.476  | 16.794 |
| O | 32.886 | 23.254 | 20.961 |
| H | 33.701 | 22.752 | 20.958 |
| H | 33.126 | 24.103 | 20.589 |
| O | 22.286 | 8.889  | 11.272 |
| H | 23.098 | 9.247  | 10.913 |
| H | 22.562 | 8.394  | 12.043 |
| O | 34.969 | 16.574 | 15.88  |
| H | 35.407 | 15.772 | 16.167 |
| H | 35.513 | 16.901 | 15.163 |
| O | 28.183 | 20.556 | 11.69  |
| H | 27.261 | 20.81  | 11.729 |
| H | 28.556 | 21.113 | 11.007 |
| O | 28.184 | 19.383 | 14.719 |
| H | 27.476 | 19.592 | 14.11  |
| H | 28.984 | 19.585 | 14.233 |
| O | 24.872 | 12.144 | 9.43   |
| H | 24.826 | 12.666 | 10.231 |



|   |        |        |        |
|---|--------|--------|--------|
| H | 23.958 | 11.996 | 9.188  |
| O | 27.915 | 9.266  | 11.271 |
| H | 28.66  | 9.642  | 10.801 |
| H | 28.008 | 8.321  | 11.15  |
| O | 34.216 | 13.143 | 17.637 |
| H | 33.781 | 13.513 | 18.405 |
| H | 33.591 | 12.503 | 17.294 |
| O | 31.702 | 10.129 | 12.535 |
| H | 31.309 | 9.286  | 12.76  |
| H | 32.645 | 9.98   | 12.605 |
| O | 25.355 | 8.517  | 22.306 |
| H | 25.206 | 7.892  | 23.016 |
| H | 26.306 | 8.621  | 22.275 |
| O | 29.441 | 10.867 | 16.12  |
| H | 29.416 | 10.227 | 15.408 |
| H | 28.616 | 11.345 | 16.04  |
| O | 31.122 | 12.532 | 11.065 |
| H | 31.196 | 11.965 | 11.832 |
| H | 32.015 | 12.84  | 10.907 |
| O | 28.552 | 8.795  | 13.93  |
| H | 29.499 | 8.672  | 13.861 |
| H | 28.268 | 8.976  | 13.034 |
| O | 26.718 | 26.606 | 22.365 |
| H | 26.922 | 27.468 | 22.002 |
| H | 25.77  | 26.522 | 22.263 |
| O | 20.485 | 24.189 | 26.946 |
| H | 19.824 | 23.499 | 26.989 |
| H | 20.982 | 24.095 | 27.759 |
| O | 21.841 | 25.67  | 24.919 |
| H | 21.461 | 24.958 | 25.433 |
| H | 22.774 | 25.46  | 24.871 |
| O | 23.943 | 26.468 | 22.389 |
| H | 23.24  | 27.114 | 22.464 |
| H | 23.571 | 25.769 | 21.852 |
| O | 12.238 | 24.196 | 24.379 |
| H | 12.264 | 25.01  | 23.876 |
| H | 13.158 | 23.962 | 24.504 |
| O | 13.619 | 27.917 | 18.44  |
| H | 14.291 | 28.521 | 18.757 |
| H | 13.651 | 27.182 | 19.051 |
| O | 18.176 | 26.857 | 16.936 |
| H | 17.888 | 25.989 | 17.218 |
| H | 17.621 | 27.464 | 17.426 |
| O | 13.129 | 20.587 | 24.819 |
| H | 14.035 | 20.781 | 25.059 |
| H | 12.692 | 21.438 | 24.822 |
| O | 8.368  | 24.538 | 22.244 |

|   |        |        |        |
|---|--------|--------|--------|
| H | 8.26   | 25.485 | 22.33  |
| H | 8.09   | 24.345 | 21.349 |
| O | 14.801 | 26.026 | 20.08  |
| H | 15.168 | 25.155 | 19.923 |
| H | 14.58  | 26.028 | 21.011 |
| O | 16.841 | 21.428 | 19.485 |
| H | 17.664 | 21.307 | 19.96  |
| H | 16.432 | 20.562 | 19.491 |
| O | 14.1   | 25.544 | 16.465 |
| H | 14.254 | 26.406 | 16.851 |
| H | 13.352 | 25.195 | 16.95  |
| O | 10.628 | 21.988 | 23.73  |
| H | 11.119 | 22.808 | 23.678 |
| H | 10.072 | 21.992 | 22.95  |
| O | 26.258 | 25.458 | 17.288 |
| H | 27.206 | 25.532 | 17.392 |
| H | 26.119 | 25.466 | 16.341 |
| O | 17.29  | 27.644 | 20.529 |
| H | 17.728 | 27.128 | 21.207 |
| H | 16.63  | 27.052 | 20.168 |
| O | 12.756 | 16.479 | 24.912 |
| H | 13.482 | 16.7   | 25.496 |
| H | 12.671 | 17.239 | 24.337 |
| O | 16.042 | 14.118 | 27.054 |
| H | 15.404 | 14.757 | 26.737 |
| H | 16.134 | 14.312 | 27.986 |
| O | 16.029 | 25.333 | 26.761 |
| H | 16.951 | 25.579 | 26.679 |
| H | 15.939 | 25.037 | 27.667 |
| O | 11.873 | 17.622 | 29.258 |
| H | 11.424 | 17.928 | 28.469 |
| H | 12.778 | 17.482 | 28.979 |
| O | 23.729 | 23.294 | 23.224 |
| H | 24.058 | 24.189 | 23.134 |
| H | 24.062 | 22.838 | 22.451 |
| O | 16.387 | 20.326 | 30.157 |
| H | 16.358 | 20.609 | 31.071 |
| H | 17.16  | 20.758 | 29.797 |
| O | 21.773 | 16.589 | 28.207 |
| H | 21.965 | 16.894 | 27.32  |
| H | 22.616 | 16.28  | 28.541 |
| O | 19.811 | 22.199 | 24.228 |
| H | 20.647 | 22.43  | 24.631 |
| H | 19.187 | 22.198 | 24.953 |
| O | 22.458 | 17.144 | 25.325 |
| H | 22.54  | 16.622 | 24.528 |
| H | 23.125 | 17.825 | 25.235 |

|   |        |        |        |
|---|--------|--------|--------|
| O | 28.235 | 15.187 | 27.246 |
| H | 28.641 | 15.958 | 27.641 |
| H | 28.357 | 15.307 | 26.304 |
| O | 11.937 | 14.865 | 28.668 |
| H | 11.386 | 14.863 | 27.885 |
| H | 11.646 | 15.632 | 29.162 |
| O | 10.115 | 20.572 | 28.846 |
| H | 9.487  | 20.234 | 29.485 |
| H | 10.295 | 19.828 | 28.271 |
| O | 21.743 | 21.82  | 27.681 |
| H | 22.61  | 21.852 | 27.276 |
| H | 21.234 | 21.243 | 27.112 |
| O | 14.851 | 23.762 | 24.915 |
| H | 15.36  | 24.056 | 24.159 |
| H | 15.232 | 24.231 | 25.657 |
| O | 17.235 | 13.891 | 29.551 |
| H | 16.489 | 13.548 | 30.042 |
| H | 17.465 | 14.704 | 30     |
| O | 12.496 | 18.392 | 23.093 |
| H | 12.583 | 19.222 | 23.562 |
| H | 12.739 | 18.6   | 22.191 |
| O | 13.511 | 21.266 | 28.659 |
| H | 12.659 | 21.659 | 28.471 |
| H | 13.674 | 21.478 | 29.579 |
| O | 9.923  | 17.477 | 27.295 |
| H | 9.111  | 17.051 | 27.568 |
| H | 10.363 | 16.827 | 26.747 |
| O | 18.347 | 8.686  | 25.953 |
| H | 18.62  | 9.597  | 26.065 |
| H | 18.068 | 8.41   | 26.826 |
| O | 24.758 | 23.037 | 28.812 |
| H | 24.497 | 23.059 | 27.891 |
| H | 25.629 | 22.639 | 28.804 |
| O | 10.883 | 14.903 | 26.04  |
| H | 10.417 | 14.692 | 25.231 |
| H | 11.719 | 15.265 | 25.746 |
| O | 21.655 | 11.816 | 28.049 |
| H | 22.116 | 11.342 | 28.742 |
| H | 22.219 | 11.724 | 27.281 |
| O | 13.533 | 12.733 | 28.119 |
| H | 14.455 | 12.946 | 27.977 |
| H | 13.182 | 13.489 | 28.589 |
| O | 23.935 | 13.857 | 27.143 |
| H | 23.268 | 14.002 | 27.814 |
| H | 24.462 | 14.655 | 27.153 |
| O | 18.692 | 26.056 | 26.329 |
| H | 19.128 | 26.796 | 26.752 |

|   |        |        |        |
|---|--------|--------|--------|
| H | 19.378 | 25.394 | 26.239 |
| O | 11.851 | 12.855 | 23.124 |
| H | 11.658 | 13.712 | 22.744 |
| H | 12.698 | 12.969 | 23.555 |
| O | 10.014 | 20.59  | 26.179 |
| H | 9.549  | 21.152 | 26.799 |
| H | 10.185 | 21.155 | 25.426 |
| O | 19.394 | 15.833 | 16.886 |
| H | 20.083 | 16.332 | 17.326 |
| H | 18.978 | 15.332 | 17.587 |
| O | 20.054 | 26.94  | 20.282 |
| H | 19.373 | 27.3   | 19.714 |
| H | 19.839 | 26.01  | 20.354 |
| O | 16.945 | 12.623 | 24.602 |
| H | 16.984 | 12.276 | 23.71  |
| H | 17.651 | 12.172 | 25.065 |
| O | 23.37  | 10.671 | 13.931 |
| H | 22.71  | 9.994  | 14.082 |
| H | 22.878 | 11.41  | 13.574 |
| O | 15.044 | 14.239 | 14.849 |
| H | 14.889 | 15.184 | 14.839 |
| H | 15.803 | 14.127 | 15.421 |
| O | 17.468 | 17.185 | 14.984 |
| H | 17.92  | 16.542 | 15.53  |
| H | 16.609 | 17.286 | 15.394 |
| O | 14.403 | 16.848 | 15.969 |
| H | 13.948 | 17.67  | 16.154 |
| H | 14.21  | 16.292 | 16.723 |
| O | 15.941 | 22.78  | 28.839 |
| H | 15.971 | 22.046 | 29.452 |
| H | 16.454 | 23.468 | 29.264 |
| O | 25.461 | 27.257 | 19.145 |
| H | 24.532 | 27.278 | 19.375 |
| H | 25.525 | 26.581 | 18.47  |
| O | 25.425 | 11.559 | 27.11  |
| H | 24.902 | 12.36  | 27.139 |
| H | 25.715 | 11.43  | 28.013 |
| O | 18.419 | 5.694  | 17.961 |
| H | 17.904 | 5.222  | 17.306 |
| H | 19.284 | 5.287  | 17.924 |
| O | 25.06  | 21.993 | 21.145 |
| H | 25.996 | 22.109 | 20.98  |
| H | 24.83  | 21.197 | 20.666 |
| O | 29.628 | 17.598 | 10.714 |
| H | 29.801 | 18.391 | 11.222 |
| H | 30.054 | 16.899 | 11.21  |
| O | 17.57  | 13.249 | 16.234 |

|   |        |        |        |
|---|--------|--------|--------|
| H | 18.437 | 13.654 | 16.246 |
| H | 17.195 | 13.459 | 17.089 |
| O | 15.28  | 15.817 | 12.454 |
| H | 14.861 | 15.48  | 11.662 |
| H | 15.297 | 15.07  | 13.052 |
| O | 21.627 | 12.663 | 13.231 |
| H | 21.25  | 12.924 | 14.071 |
| H | 21.47  | 13.412 | 12.655 |
| O | 17.755 | 15.73  | 25.649 |
| H | 18.607 | 15.4   | 25.932 |
| H | 17.126 | 15.092 | 25.988 |
| O | 18.731 | 22.555 | 17.426 |
| H | 17.984 | 22.738 | 16.856 |
| H | 18.404 | 22.718 | 18.31  |
| O | 16.305 | 13.653 | 9.176  |
| H | 15.683 | 13.996 | 9.818  |
| H | 15.787 | 13.539 | 8.379  |
| O | 14.368 | 13.467 | 21.096 |
| H | 14.669 | 14.215 | 21.613 |
| H | 14.139 | 13.841 | 20.245 |
| O | 22.909 | 23.677 | 16.692 |
| H | 22.302 | 24.379 | 16.929 |
| H | 22.394 | 22.875 | 16.78  |
| O | 22.343 | 26.264 | 13.759 |
| H | 21.624 | 26.451 | 13.154 |
| H | 22.138 | 26.778 | 14.54  |
| O | 8.898  | 18.427 | 15.597 |
| H | 9.56   | 19.004 | 15.215 |
| H | 8.079  | 18.693 | 15.179 |
| O | 11.489 | 21.897 | 12.634 |
| H | 12.403 | 21.614 | 12.659 |
| H | 11.531 | 22.85  | 12.711 |
| O | 21.335 | 19.709 | 23.292 |
| H | 20.775 | 20.422 | 23.599 |
| H | 20.725 | 19.007 | 23.064 |
| O | 13.262 | 26.321 | 13.77  |
| H | 13.79  | 27.004 | 14.183 |
| H | 13.563 | 25.508 | 14.176 |
| O | 25.524 | 21.135 | 12.809 |
| H | 25.102 | 20.588 | 12.146 |
| H | 25.298 | 22.031 | 12.559 |
| O | 27.382 | 25.171 | 14.397 |
| H | 27.956 | 24.443 | 14.635 |
| H | 26.543 | 24.758 | 14.194 |
| O | 19.293 | 13.239 | 27.628 |
| H | 18.729 | 13.63  | 28.295 |
| H | 20.128 | 13.096 | 28.074 |

|   |        |        |        |
|---|--------|--------|--------|
| O | 11.386 | 16.902 | 19.667 |
| H | 10.675 | 17.357 | 19.216 |
| H | 11.773 | 17.567 | 20.236 |
| O | 14.224 | 10.457 | 25.473 |
| H | 13.675 | 10.076 | 24.788 |
| H | 13.607 | 10.898 | 26.057 |
| O | 27.741 | 16.05  | 24.581 |
| H | 26.823 | 16.164 | 24.335 |
| H | 28.205 | 16.731 | 24.094 |
| O | 15.712 | 18.646 | 24.882 |
| H | 16.604 | 18.442 | 24.598 |
| H | 15.821 | 19.333 | 25.539 |
| O | 18.883 | 6.511  | 14.197 |
| H | 19.033 | 5.952  | 14.959 |
| H | 19.752 | 6.635  | 13.816 |
| O | 24.681 | 20.073 | 14.961 |
| H | 23.846 | 20.534 | 15.05  |
| H | 25.116 | 20.506 | 14.227 |
| O | 18.261 | 22.005 | 26.323 |
| H | 17.341 | 22.148 | 26.101 |
| H | 18.241 | 21.652 | 27.212 |
| O | 15.03  | 16.584 | 26.547 |
| H | 15.496 | 17.223 | 26.006 |
| H | 14.873 | 17.039 | 27.374 |
| O | 19.257 | 18.968 | 27.196 |
| H | 19.113 | 18.833 | 26.259 |
| H | 19.164 | 18.097 | 27.581 |
| O | 13.242 | 15.061 | 18.782 |
| H | 12.414 | 14.723 | 18.441 |
| H | 13.003 | 15.872 | 19.231 |
| O | 18.487 | 11.278 | 13.645 |
| H | 18.181 | 11.915 | 13     |
| H | 18.748 | 11.807 | 14.399 |
| O | 16.854 | 8.504  | 19.286 |
| H | 17.512 | 8.476  | 19.98  |
| H | 16.016 | 8.472  | 19.748 |
| O | 14.272 | 18.25  | 13.393 |
| H | 14.767 | 17.467 | 13.154 |
| H | 13.532 | 18.261 | 12.786 |
| O | 21.4   | 11.534 | 24.354 |
| H | 22.108 | 10.945 | 24.616 |
| H | 21.833 | 12.373 | 24.195 |
| O | 14.464 | 18.51  | 28.583 |
| H | 13.694 | 19.017 | 28.328 |
| H | 14.964 | 19.1   | 29.147 |
| O | 13.277 | 19.405 | 15.875 |
| H | 13.618 | 19.224 | 14.999 |

|   |        |        |        |
|---|--------|--------|--------|
| H | 13.859 | 20.078 | 16.225 |
| O | 15.771 | 14.127 | 18.118 |
| H | 16.154 | 14.342 | 18.969 |
| H | 14.88  | 14.475 | 18.163 |
| O | 14.25  | 22.462 | 13.34  |
| H | 14.147 | 22.425 | 12.389 |
| H | 15.019 | 23.016 | 13.476 |
| O | 16.827 | 11.302 | 10.527 |
| H | 17.434 | 11.501 | 11.239 |
| H | 16.743 | 12.126 | 10.047 |
| O | 14.742 | 28.238 | 15.334 |
| H | 14.438 | 28.843 | 16.011 |
| H | 15.695 | 28.235 | 15.425 |
| O | 22.076 | 9.108  | 15.841 |
| H | 22.533 | 9.041  | 16.68  |
| H | 21.422 | 9.793  | 15.978 |
| O | 24.223 | 17.423 | 14.731 |
| H | 23.553 | 17.297 | 15.402 |
| H | 24.473 | 18.344 | 14.812 |
| O | 6.718  | 15.743 | 20.562 |
| H | 6.749  | 16.374 | 21.281 |
| H | 7.498  | 15.202 | 20.685 |
| O | 10.755 | 23.099 | 29.429 |
| H | 10.654 | 22.161 | 29.268 |
| H | 10.382 | 23.516 | 28.652 |
| O | 27.991 | 19.053 | 24.709 |
| H | 27.83  | 19.759 | 24.083 |
| H | 27.119 | 18.729 | 24.934 |
| O | 25.571 | 16.088 | 26.879 |
| H | 25.369 | 16.91  | 26.432 |
| H | 26.523 | 16.094 | 26.975 |
| O | 24.569 | 19.77  | 10.825 |
| H | 23.627 | 19.909 | 10.921 |
| H | 24.689 | 18.832 | 10.973 |
| O | 21.065 | 25.826 | 17.148 |
| H | 21.323 | 26.57  | 17.693 |
| H | 20.241 | 26.1   | 16.744 |
| O | 7.429  | 14.828 | 14.904 |
| H | 7.2    | 14.177 | 14.241 |
| H | 8.385  | 14.873 | 14.875 |
| O | 19.662 | 19.241 | 14.753 |
| H | 19.241 | 19.991 | 14.332 |
| H | 18.958 | 18.601 | 14.862 |
| O | 25.015 | 25.077 | 25.389 |
| H | 24.909 | 25.396 | 26.285 |
| H | 25.954 | 25.154 | 25.217 |
| O | 15.648 | 10.447 | 15.077 |

|   |        |        |        |
|---|--------|--------|--------|
| H | 15.635 | 9.705  | 15.681 |
| H | 16.538 | 10.456 | 14.726 |
| O | 24.255 | 22.071 | 26.165 |
| H | 25.154 | 22.104 | 25.836 |
| H | 23.727 | 22.436 | 25.455 |
| O | 19.663 | 25.389 | 12.536 |
| H | 19.505 | 26.136 | 13.115 |
| H | 19.449 | 25.714 | 11.662 |
| O | 22.74  | 15.438 | 22.947 |
| H | 23.517 | 15.344 | 22.397 |
| H | 22.671 | 14.602 | 23.409 |
| O | 14.287 | 21.072 | 10.769 |
| H | 15.146 | 20.653 | 10.73  |
| H | 14.247 | 21.611 | 9.979  |
| O | 22.303 | 16.254 | 11.052 |
| H | 23.249 | 16.2   | 11.189 |
| H | 21.924 | 15.914 | 11.862 |
| O | 16.339 | 23.922 | 16.134 |
| H | 16.628 | 24.337 | 15.322 |
| H | 15.499 | 24.337 | 16.33  |
| O | 21.65  | 19.95  | 11.103 |
| H | 21.479 | 19.292 | 11.777 |
| H | 21.353 | 20.773 | 11.491 |
| O | 16.783 | 20.269 | 14.756 |
| H | 16.29  | 20.474 | 15.55  |
| H | 16.349 | 19.496 | 14.397 |
| O | 20.451 | 13.255 | 15.701 |
| H | 20.65  | 13.928 | 16.352 |
| H | 20.389 | 12.444 | 16.206 |
| O | 24.977 | 13.027 | 11.868 |
| H | 25.252 | 12.3   | 12.426 |
| H | 24.624 | 13.676 | 12.477 |
| O | 18.644 | 13.758 | 12.463 |
| H | 18.538 | 14.559 | 12.976 |
| H | 18.746 | 14.063 | 11.561 |
| O | 16.501 | 15.419 | 20.562 |
| H | 16.026 | 15.502 | 21.388 |
| H | 16.832 | 16.3   | 20.386 |
| O | 27.658 | 10.103 | 21.625 |
| H | 28.235 | 10.275 | 20.881 |
| H | 27.592 | 10.945 | 22.077 |
| O | 25.356 | 22.448 | 17.363 |
| H | 25.957 | 23.193 | 17.351 |
| H | 24.51  | 22.82  | 17.113 |
| O | 24.968 | 14.88  | 21.457 |
| H | 25.063 | 13.947 | 21.268 |
| H | 24.656 | 15.261 | 20.636 |



|   |        |        |        |
|---|--------|--------|--------|
| O | 16.794 | 19.565 | 10.797 |
| H | 16.91  | 18.774 | 11.323 |
| H | 17.268 | 20.244 | 11.278 |
| O | 9.428  | 18.475 | 18.235 |
| H | 8.496  | 18.538 | 18.445 |
| H | 9.453  | 18.386 | 17.282 |
| O | 30.636 | 22.114 | 13.548 |
| H | 31.534 | 22.436 | 13.618 |
| H | 30.729 | 21.169 | 13.423 |
| O | 21.547 | 23.357 | 21.133 |
| H | 22.255 | 23.657 | 20.563 |
| H | 21.957 | 23.253 | 21.991 |
| O | 15.709 | 27.732 | 22.834 |
| H | 16.206 | 28.194 | 22.158 |
| H | 16.316 | 27.07  | 23.166 |
| O | 16.011 | 17.212 | 31.043 |
| H | 15.317 | 17.042 | 30.406 |
| H | 16.788 | 17.379 | 30.51  |
| O | 24.396 | 23.347 | 12.071 |
| H | 24.119 | 24.109 | 11.562 |
| H | 23.629 | 23.12  | 12.597 |
| O | 9.908  | 17.41  | 23.452 |
| H | 10.793 | 17.759 | 23.344 |
| H | 9.347  | 18.185 | 23.484 |
| O | 14.078 | 22.542 | 8.549  |
| H | 14.538 | 23.355 | 8.338  |
| H | 13.169 | 22.71  | 8.303  |
| O | 15.072 | 21.246 | 16.941 |
| H | 15.033 | 21.149 | 17.893 |
| H | 15.506 | 22.088 | 16.804 |
| O | 17.755 | 17.448 | 12.332 |
| H | 18.247 | 17.413 | 13.152 |
| H | 16.93  | 17.005 | 12.528 |
| O | 16.921 | 23.022 | 22.968 |
| H | 16.499 | 23.164 | 22.121 |
| H | 17.771 | 22.638 | 22.751 |
| O | 8.472  | 19.84  | 23.852 |
| H | 8.277  | 20.697 | 23.474 |
| H | 8.95   | 20.037 | 24.658 |
| O | 17.786 | 21.334 | 12.658 |
| H | 17.278 | 22.145 | 12.626 |
| H | 17.52  | 20.917 | 13.477 |
| O | 11.65  | 21.466 | 19.131 |
| H | 12.012 | 20.691 | 18.703 |
| H | 11.042 | 21.833 | 18.489 |
| O | 19.878 | 12.178 | 8.33   |
| H | 20.645 | 12.75  | 8.341  |

|   |        |        |        |
|---|--------|--------|--------|
| H | 19.732 | 11.955 | 9.249  |
| O | 25.465 | 16.898 | 23.713 |
| H | 25.257 | 16.216 | 23.076 |
| H | 24.796 | 17.568 | 23.574 |
| O | 25.204 | 18.77  | 26.226 |
| H | 24.96  | 19.407 | 25.555 |
| H | 24.691 | 19.022 | 26.994 |
| O | 17.469 | 25.759 | 23.544 |
| H | 17.553 | 24.829 | 23.332 |
| H | 18.056 | 25.889 | 24.288 |
| O | 14.927 | 15.308 | 22.925 |
| H | 14.754 | 14.585 | 23.528 |
| H | 14.552 | 16.075 | 23.358 |
| O | 27.736 | 17.219 | 19.315 |
| H | 27.382 | 17.243 | 18.426 |
| H | 27.865 | 16.288 | 19.496 |
| O | 14.371 | 13.497 | 24.665 |
| H | 13.969 | 12.678 | 24.955 |
| H | 15.312 | 13.331 | 24.71  |
| O | 19.094 | 11.327 | 25.729 |
| H | 19.08  | 11.87  | 26.518 |
| H | 19.942 | 11.511 | 25.326 |
| O | 20.257 | 22.752 | 12.421 |
| H | 19.441 | 22.302 | 12.202 |
| H | 19.999 | 23.665 | 12.552 |
| O | 16.52  | 23.984 | 12.622 |
| H | 16.125 | 24.529 | 11.941 |
| H | 17.05  | 24.593 | 13.138 |
| O | 9.36   | 26.219 | 24.548 |
| H | 9.741  | 25.846 | 25.343 |
| H | 8.518  | 25.773 | 24.454 |
| O | 21.31  | 21.552 | 17.118 |
| H | 20.371 | 21.738 | 17.095 |
| H | 21.367 | 20.637 | 17.392 |
| O | 26.912 | 22.294 | 24.819 |
| H | 27.582 | 22.928 | 25.074 |
| H | 27.283 | 21.845 | 24.059 |
| O | 28.098 | 12.063 | 12.714 |
| H | 28.49  | 12.491 | 11.953 |
| H | 27.572 | 11.353 | 12.345 |
| O | 20.386 | 16.855 | 22.874 |
| H | 19.688 | 16.2   | 22.901 |
| H | 21.169 | 16.361 | 22.63  |
| O | 20.219 | 17.398 | 9.613  |
| H | 21.062 | 17.358 | 10.063 |
| H | 19.753 | 16.615 | 9.906  |
| O | 16.815 | 12.151 | 21.77  |

|   |        |        |        |
|---|--------|--------|--------|
| H | 15.968 | 12.574 | 21.625 |
| H | 17.118 | 11.915 | 20.894 |
| O | 23.346 | 13.405 | 24.485 |
| H | 23.579 | 13.548 | 25.403 |
| H | 24.171 | 13.162 | 24.065 |
| O | 14.298 | 10.813 | 12.508 |
| H | 14.985 | 10.8   | 11.841 |
| H | 14.71  | 10.432 | 13.283 |
| O | 8.414  | 13.815 | 22.047 |
| H | 8.693  | 12.915 | 21.88  |
| H | 9.23   | 14.309 | 22.122 |
| O | 27.268 | 12.771 | 15.442 |
| H | 26.34  | 12.54  | 15.396 |
| H | 27.646 | 12.406 | 14.643 |
| O | 20.594 | 10.31  | 22.154 |
| H | 21.357 | 9.739  | 22.06  |
| H | 20.755 | 10.793 | 22.965 |
| O | 29.545 | 13.664 | 8.748  |
| H | 28.742 | 13.678 | 9.268  |
| H | 30.139 | 13.095 | 9.239  |
| O | 23.224 | 6.175  | 17.644 |
| H | 23.777 | 6.187  | 16.863 |
| H | 22.995 | 7.093  | 17.788 |
| O | 19.409 | 24.33  | 19.467 |
| H | 20.177 | 23.984 | 19.922 |
| H | 19.523 | 24.05  | 18.559 |
| O | 15.15  | 23.322 | 20.352 |
| H | 15.685 | 22.545 | 20.191 |
| H | 14.359 | 22.986 | 20.773 |
| O | 22.52  | 22.091 | 13.856 |
| H | 21.633 | 22.215 | 13.52  |
| H | 22.443 | 22.242 | 14.798 |
| O | 18.279 | 15.065 | 22.961 |
| H | 17.794 | 15.164 | 23.781 |
| H | 17.829 | 14.357 | 22.501 |
| O | 15.927 | 8.033  | 16.597 |
| H | 15.802 | 7.089  | 16.502 |
| H | 16.391 | 8.13   | 17.429 |
| O | 28.018 | 22.874 | 19.665 |
| H | 27.946 | 21.926 | 19.553 |
| H | 28.904 | 23.008 | 20.002 |
| O | 17.628 | 25.957 | 14.337 |
| H | 17.759 | 26.13  | 15.27  |
| H | 18.137 | 26.635 | 13.894 |
| O | 18.629 | 18.047 | 24.495 |
| H | 19.425 | 17.798 | 24.027 |
| H | 18.252 | 17.217 | 24.786 |

|   |        |        |        |
|---|--------|--------|--------|
| O | 19.091 | 21.702 | 21.61  |
| H | 19.893 | 21.913 | 21.132 |
| H | 19.386 | 21.511 | 22.501 |
| O | 23.917 | 24.227 | 20.046 |
| H | 24.379 | 23.451 | 20.363 |
| H | 24.368 | 24.46  | 19.235 |
| O | 21.055 | 15.483 | 13.922 |
| H | 20.52  | 14.923 | 14.484 |
| H | 21.497 | 16.077 | 14.529 |
| O | 24.222 | 10.565 | 18.262 |
| H | 24.868 | 9.939  | 18.589 |
| H | 24.551 | 10.82  | 17.4   |
| O | 25.046 | 11.998 | 21.977 |
| H | 25.844 | 12.043 | 22.503 |
| H | 24.907 | 11.062 | 21.832 |
| O | 10.185 | 19.902 | 11.363 |
| H | 10.681 | 20.668 | 11.651 |
| H | 9.446  | 19.854 | 11.969 |
| O | 20.387 | 10.75  | 11.029 |
| H | 20.686 | 11.237 | 11.797 |
| H | 21.093 | 10.129 | 10.849 |
| O | 21.753 | 14.324 | 8.707  |
| H | 21.991 | 14.935 | 9.404  |
| H | 22.481 | 14.373 | 8.087  |
| O | 22.599 | 19.857 | 8.309  |
| H | 22.736 | 20.754 | 8.005  |
| H | 22.329 | 19.952 | 9.222  |
| O | 19.101 | 14.65  | 9.853  |
| H | 18.31  | 14.349 | 9.407  |
| H | 19.813 | 14.432 | 9.253  |
| O | 15.175 | 18.744 | 8.697  |
| H | 15.753 | 18.867 | 9.45   |
| H | 15.604 | 18.066 | 8.174  |
| O | 24.633 | 24.894 | 15.023 |
| H | 24.047 | 24.343 | 15.542 |
| H | 24.047 | 25.426 | 14.484 |
| O | 27.14  | 14.032 | 10.141 |
| H | 26.858 | 14.497 | 10.93  |
| H | 26.466 | 13.368 | 10.001 |
| O | 26.89  | 17.52  | 9.823  |
| H | 26.255 | 17.894 | 10.434 |
| H | 27.67  | 17.362 | 10.355 |
| O | 8.073  | 19.293 | 12.916 |
| H | 7.339  | 19.82  | 13.231 |
| H | 7.831  | 18.392 | 13.131 |
| O | 18.504 | 19.38  | 8.678  |
| H | 17.977 | 19.426 | 9.475  |

|   |        |        |        |
|---|--------|--------|--------|
| H | 19.214 | 18.775 | 8.895  |
| O | 20.104 | 6.795  | 25.015 |
| H | 20.145 | 6.764  | 24.059 |
| H | 19.476 | 7.492  | 25.204 |
| O | 22.582 | 8.671  | 21.629 |
| H | 22.293 | 7.763  | 21.724 |
| H | 23.441 | 8.695  | 22.051 |
| O | 19.672 | 12.13  | 20.083 |
| H | 18.909 | 11.736 | 19.661 |
| H | 19.929 | 11.496 | 20.753 |
| O | 25.745 | 8.456  | 19.464 |
| H | 26.1   | 7.602  | 19.219 |
| H | 25.767 | 8.46   | 20.421 |
| O | 20.681 | 4.849  | 17.283 |
| H | 21.085 | 3.984  | 17.214 |
| H | 21.419 | 5.454  | 17.358 |
| O | 24.821 | 6.199  | 15.508 |
| H | 25.311 | 5.466  | 15.136 |
| H | 25.487 | 6.86   | 15.697 |
| O | 20.735 | 10.817 | 17.859 |
| H | 21.253 | 10.076 | 18.174 |
| H | 20.533 | 11.319 | 18.649 |
| O | 18.595 | 4.874  | 20.615 |
| H | 17.733 | 4.934  | 21.028 |
| H | 18.43  | 5.061  | 19.69  |
| O | 22.777 | 7.188  | 13.749 |
| H | 23.243 | 6.495  | 14.218 |
| H | 22.565 | 7.833  | 14.424 |
| O | 22.325 | 8.632  | 18.507 |
| H | 23.08  | 9.21   | 18.608 |
| H | 21.889 | 8.655  | 19.359 |
| O | 15.022 | 8.21   | 21.62  |
| H | 15.405 | 8.711  | 22.34  |
| H | 14.179 | 8.633  | 21.456 |
| O | 23.142 | 5.674  | 20.23  |
| H | 23.876 | 6.209  | 20.531 |
| H | 23.16  | 5.756  | 19.277 |
| O | 17.461 | 8.619  | 13.175 |
| H | 17.91  | 8.001  | 13.751 |
| H | 17.992 | 9.414  | 13.216 |
| O | 16.549 | 9.056  | 23.942 |
| H | 17.251 | 8.693  | 24.482 |
| H | 16.269 | 9.842  | 24.409 |
| O | 19.849 | 6.507  | 22.403 |
| H | 19.182 | 7.037  | 21.965 |
| H | 19.777 | 5.645  | 21.994 |
| O | 13.207 | 10.901 | 16.462 |

|   |        |        |        |
|---|--------|--------|--------|
| H | 13.966 | 10.894 | 15.878 |
| H | 12.945 | 9.983  | 16.526 |
| O | 23.406 | 10.236 | 25.781 |
| H | 23.432 | 9.436  | 26.307 |
| H | 24.233 | 10.677 | 25.974 |
| O | 24.848 | 9.495  | 10.383 |
| H | 24.994 | 10.398 | 10.1   |
| H | 25.694 | 9.213  | 10.73  |
| O | 18.294 | 8.698  | 21.634 |
| H | 19.002 | 9.278  | 21.914 |
| H | 17.596 | 8.848  | 22.271 |
| O | 27.262 | 11.494 | 24.43  |
| H | 26.724 | 11.713 | 25.191 |
| H | 27.418 | 10.553 | 24.51  |
| O | 16.553 | 11.125 | 27.716 |
| H | 16.055 | 10.917 | 26.925 |
| H | 16.725 | 12.064 | 27.651 |
| O | 18.636 | 14.472 | 19.061 |
| H | 19.069 | 13.674 | 19.365 |
| H | 18.005 | 14.68  | 19.751 |
| O | 26.295 | 5.941  | 18.23  |
| H | 25.431 | 5.529  | 18.237 |
| H | 26.908 | 5.213  | 18.332 |
| O | 17.242 | 11.293 | 18.992 |
| H | 17.164 | 10.418 | 18.613 |
| H | 16.411 | 11.72  | 18.781 |
| O | 11.883 | 15.87  | 9.605  |
| H | 12.188 | 16.476 | 10.28  |
| H | 11.015 | 16.195 | 9.365  |
| O | 24.303 | 15.474 | 8.769  |
| H | 24.325 | 16.277 | 8.249  |
| H | 25.183 | 15.403 | 9.137  |
| O | 10.345 | 24.772 | 26.483 |
| H | 10.794 | 24.263 | 25.808 |
| H | 11.047 | 25.231 | 26.943 |
| O | 6.743  | 23.957 | 24.422 |
| H | 7.142  | 23.753 | 25.268 |
| H | 7.408  | 23.714 | 23.778 |
| O | 11.233 | 24.062 | 21.261 |
| H | 10.486 | 23.476 | 21.134 |
| H | 11.931 | 23.493 | 21.584 |
| O | 11.536 | 26.417 | 22.465 |
| H | 10.698 | 26.726 | 22.807 |
| H | 11.308 | 25.667 | 21.915 |
| O | 7.57   | 23.724 | 19.557 |
| H | 6.861  | 23.086 | 19.479 |
| H | 7.503  | 24.255 | 18.763 |

|   |        |        |        |
|---|--------|--------|--------|
| O | 9.281  | 21.829 | 21.265 |
| H | 8.698  | 22.45  | 20.829 |
| H | 9.496  | 21.187 | 20.588 |
| O | 10.03  | 27.47  | 19.351 |
| H | 9.481  | 28.238 | 19.507 |
| H | 9.7    | 26.811 | 19.962 |
| O | 8.322  | 22.971 | 26.654 |
| H | 7.712  | 23.213 | 27.351 |
| H | 8.996  | 23.651 | 26.679 |
| O | 7.694  | 13.829 | 26.977 |
| H | 6.99   | 13.731 | 26.335 |
| H | 8.345  | 14.375 | 26.537 |
| O | 19.124 | 16.275 | 29.635 |
| H | 19.402 | 15.702 | 30.349 |
| H | 19.934 | 16.501 | 29.179 |
| O | 11.99  | 9.548  | 24.076 |
| H | 11.727 | 10.048 | 23.304 |
| H | 11.218 | 9.557  | 24.642 |
| O | 10.627 | 16.069 | 14.79  |
| H | 10.043 | 16.794 | 15.01  |
| H | 11.485 | 16.478 | 14.678 |
| O | 7.258  | 25.223 | 17.33  |
| H | 7.475  | 26.051 | 17.759 |
| H | 6.914  | 25.48  | 16.474 |
| O | 4.969  | 14.157 | 19.343 |
| H | 5.51   | 14.933 | 19.496 |
| H | 5.238  | 13.844 | 18.479 |
| O | 5.269  | 16.773 | 17.728 |
| H | 5.056  | 17.109 | 16.857 |
| H | 5.421  | 15.838 | 17.593 |
| O | 6.669  | 17.421 | 14.285 |
| H | 5.782  | 17.404 | 14.643 |
| H | 7.076  | 16.619 | 14.614 |
| O | 3.784  | 19.597 | 21.196 |
| H | 3.605  | 19.147 | 20.371 |
| H | 3.726  | 18.91  | 21.861 |
| O | 6.793  | 20.993 | 16.992 |
| H | 7.708  | 21.26  | 17.083 |
| H | 6.708  | 20.232 | 17.566 |
| O | 10.889 | 20.232 | 15.06  |
| H | 10.994 | 20.785 | 14.286 |
| H | 11.766 | 20.18  | 15.439 |
| O | 6.589  | 20.397 | 27.023 |
| H | 7.251  | 21.087 | 27.054 |
| H | 6.629  | 19.987 | 27.887 |
| O | 10.311 | 13.591 | 14.341 |
| H | 11.167 | 13.391 | 13.961 |

|   |        |        |        |
|---|--------|--------|--------|
| H | 10.27  | 14.547 | 14.347 |
| O | 22.708 | 27.764 | 19.976 |
| H | 23.029 | 28.05  | 20.831 |
| H | 21.756 | 27.738 | 20.074 |
| O | 15.493 | 21.324 | 26.146 |
| H | 15.28  | 22.159 | 25.728 |
| H | 15.233 | 21.441 | 27.059 |
| O | 9.923  | 11.473 | 21.452 |
| H | 10.413 | 11.212 | 20.673 |
| H | 10.595 | 11.737 | 22.08  |
| O | 9.436  | 21.342 | 17.242 |
| H | 9.867  | 22.169 | 17.025 |
| H | 9.86   | 20.696 | 16.678 |
| O | 6.216  | 20.945 | 14.084 |
| H | 5.983  | 20.699 | 14.979 |
| H | 6.268  | 21.9   | 14.103 |
| O | 12.158 | 18.656 | 26.6   |
| H | 11.225 | 18.793 | 26.439 |
| H | 12.596 | 19.249 | 25.989 |
| O | 10.421 | 24.811 | 14.196 |
| H | 10.087 | 25.32  | 13.456 |
| H | 11.367 | 24.955 | 14.177 |
| O | 13.184 | 21.666 | 21.343 |
| H | 13.397 | 20.762 | 21.574 |
| H | 12.751 | 21.6   | 20.492 |
| O | 8.511  | 15.399 | 24.713 |
| H | 8.957  | 16.163 | 24.349 |
| H | 7.882  | 15.144 | 24.038 |
| O | 8.856  | 11.454 | 17.814 |
| H | 9.752  | 11.453 | 18.151 |
| H | 8.62   | 12.381 | 17.765 |
| O | 11.364 | 11.877 | 18.304 |
| H | 11.246 | 12.788 | 18.033 |
| H | 12.181 | 11.607 | 17.884 |
| O | 11.853 | 25.183 | 18.281 |
| H | 11.887 | 24.91  | 19.198 |
| H | 11.671 | 26.122 | 18.318 |
| O | 5.727  | 16.408 | 23.623 |
| H | 4.838  | 16.737 | 23.752 |
| H | 6.176  | 16.598 | 24.447 |
| O | 13.069 | 12.808 | 13.633 |
| H | 13.689 | 12.119 | 13.395 |
| H | 13.468 | 13.241 | 14.388 |
| O | 6.632  | 18.898 | 19.134 |
| H | 6.882  | 18.464 | 19.949 |
| H | 6.162  | 18.226 | 18.64  |
| O | 10.827 | 15.006 | 21.802 |



|   |        |        |        |
|---|--------|--------|--------|
| H | 11.27  | 15.512 | 21.121 |
| H | 10.502 | 15.664 | 22.417 |
| O | 11.4   | 11.911 | 26.723 |
| H | 12.157 | 12.312 | 27.149 |
| H | 11.041 | 12.605 | 26.17  |
| O | 11.083 | 14.387 | 17.521 |
| H | 10.829 | 15.24  | 17.873 |
| H | 11.042 | 14.498 | 16.572 |
| O | 13.664 | 10.862 | 21.141 |
| H | 13.498 | 10.818 | 20.199 |
| H | 13.795 | 11.794 | 21.317 |
| O | 10.412 | 23.596 | 16.652 |
| H | 10.728 | 24.219 | 17.306 |
| H | 10.385 | 24.097 | 15.837 |
| O | 7.234  | 18.164 | 22.144 |
| H | 7.628  | 18.837 | 22.698 |
| H | 6.779  | 17.586 | 22.756 |
| O | 5.391  | 21.911 | 19.72  |
| H | 5.166  | 21.406 | 20.501 |
| H | 5.839  | 21.286 | 19.15  |
| O | 12.741 | 18.302 | 11.121 |
| H | 11.822 | 18.561 | 11.053 |
| H | 13.228 | 19.063 | 10.804 |
| O | 8.687  | 16.129 | 12.3   |
| H | 8.632  | 16.325 | 11.364 |
| H | 8.437  | 15.207 | 12.366 |
| O | 14.027 | 13.954 | 10.726 |
| H | 13.286 | 14.48  | 10.426 |
| H | 13.64  | 13.308 | 11.316 |

**Table S15. PYP chromophore + 397 waters**

| <b>Method</b>   | <b>Time (s)</b> | <b>iterations</b> | <b>E (eV)</b> | <b>f</b>   |
|-----------------|-----------------|-------------------|---------------|------------|
| <b>CIS</b>      | <b>894.0</b>    | <b>12</b>         | <b>3.65</b>   | <b>1.6</b> |
| <b>TD-BLYP</b>  | <b>-</b>        | <b>-</b>          | <b>-</b>      | <b>-</b>   |
| <b>TD-B3LYP</b> | <b>910.3</b>    | <b>7</b>          | <b>0.09</b>   | <b>0.0</b> |

|   |        |        |        |
|---|--------|--------|--------|
| C | 22.967 | 16.81  | 19.507 |
| C | 24.27  | 16.774 | 18.931 |
| C | 24.617 | 15.671 | 18.139 |
| C | 23.681 | 14.66  | 17.949 |
| C | 22.419 | 14.608 | 18.558 |
| C | 22.092 | 15.731 | 19.368 |
| S | 22.3   | 18.226 | 20.373 |
| C | 21.107 | 18.737 | 19.24  |
| C | 19.881 | 18.611 | 19.724 |
| O | 21.503 | 18.978 | 18.056 |
| C | 18.678 | 18.857 | 18.895 |
| C | 17.412 | 18.7   | 19.379 |
| C | 16.267 | 18.768 | 18.424 |
| C | 15.007 | 18.753 | 18.949 |
| C | 14.627 | 18.622 | 20.339 |
| C | 15.744 | 18.498 | 21.241 |
| C | 17.075 | 18.511 | 20.793 |
| O | 13.416 | 18.649 | 20.62  |
| H | 25.016 | 17.532 | 19.156 |
| H | 25.561 | 15.727 | 17.603 |
| H | 23.959 | 13.891 | 17.234 |
| H | 21.774 | 13.742 | 18.433 |
| H | 21.138 | 15.665 | 19.885 |
| H | 19.762 | 18.159 | 20.708 |
| H | 18.901 | 19.227 | 17.895 |
| H | 16.528 | 18.974 | 17.391 |
| H | 14.139 | 18.825 | 18.303 |
| H | 15.6   | 18.345 | 22.305 |
| H | 17.886 | 18.502 | 21.514 |
| O | 29.182 | 25.39  | 22.779 |
| H | 29.281 | 25.376 | 23.731 |
| H | 28.342 | 25.825 | 22.632 |
| O | 29.551 | 22.926 | 11.032 |
| H | 30.104 | 23.7   | 10.923 |
| H | 29.77  | 22.597 | 11.904 |
| O | 33.894 | 22.795 | 16.377 |
| H | 34.33  | 22.95  | 17.215 |
| H | 33.272 | 22.09  | 16.558 |
| O | 30.112 | 21.211 | 18.047 |
| H | 30.308 | 22.125 | 18.252 |
| H | 29.292 | 21.246 | 17.554 |

|   |        |        |        |
|---|--------|--------|--------|
| O | 24.075 | 15.499 | 29.422 |
| H | 24.789 | 14.887 | 29.603 |
| H | 23.281 | 15.008 | 29.631 |
| O | 26.423 | 14.107 | 29.296 |
| H | 26.561 | 13.165 | 29.395 |
| H | 26.809 | 14.318 | 28.445 |
| O | 27.383 | 22.332 | 28.542 |
| H | 28.134 | 22.88  | 28.772 |
| H | 27.568 | 21.487 | 28.951 |
| O | 25.825 | 17.56  | 30.061 |
| H | 25.435 | 16.932 | 29.452 |
| H | 25.968 | 17.058 | 30.863 |
| O | 28.391 | 13.11  | 22.223 |
| H | 29.252 | 12.971 | 21.829 |
| H | 28.33  | 12.444 | 22.907 |
| O | 31.475 | 22.004 | 26.329 |
| H | 31.137 | 21.63  | 27.143 |
| H | 31.181 | 21.401 | 25.647 |
| O | 29.307 | 17.709 | 27.704 |
| H | 30.224 | 17.766 | 27.973 |
| H | 29.295 | 18.067 | 26.817 |
| O | 24.938 | 16.847 | 11.925 |
| H | 24.601 | 17.235 | 12.732 |
| H | 25.689 | 16.325 | 12.206 |
| O | 32.469 | 14.752 | 21.385 |
| H | 33.348 | 14.759 | 21.766 |
| H | 32.195 | 13.836 | 21.431 |
| O | 30.816 | 19.132 | 13.418 |
| H | 30.974 | 18.346 | 13.94  |
| H | 31.54  | 19.153 | 12.792 |
| O | 30.284 | 15.257 | 11.884 |
| H | 31.234 | 15.279 | 11.994 |
| H | 30.077 | 14.33  | 11.768 |
| O | 32.263 | 11.353 | 17.063 |
| H | 32.41  | 10.514 | 17.499 |
| H | 31.311 | 11.441 | 17.027 |
| O | 33.28  | 18.588 | 15.193 |
| H | 33.815 | 17.822 | 15.401 |
| H | 32.532 | 18.235 | 14.713 |
| O | 26.315 | 12.269 | 19.428 |
| H | 25.586 | 12.142 | 20.035 |
| H | 26.005 | 11.901 | 18.601 |
| O | 24.721 | 18.014 | 7.559  |
| H | 23.933 | 18.514 | 7.772  |
| H | 25.27  | 18.627 | 7.07   |
| O | 29.689 | 10.354 | 19.041 |
| H | 30.009 | 9.628  | 18.504 |

|   |        |        |        |
|---|--------|--------|--------|
| H | 28.925 | 10.684 | 18.568 |
| O | 31.465 | 16.672 | 14.469 |
| H | 32.168 | 16.029 | 14.378 |
| H | 30.721 | 16.168 | 14.799 |
| O | 34.923 | 10.571 | 19.564 |
| H | 35.348 | 10.322 | 18.743 |
| H | 35.619 | 10.977 | 20.08  |
| O | 30.751 | 18.966 | 19.536 |
| H | 30.85  | 19.768 | 19.022 |
| H | 29.824 | 18.742 | 19.454 |
| O | 21.624 | 17.545 | 15.698 |
| H | 21.844 | 17.862 | 16.574 |
| H | 21.068 | 18.23  | 15.328 |
| O | 27.301 | 20.143 | 19.909 |
| H | 26.457 | 20.142 | 19.458 |
| H | 27.68  | 19.287 | 19.713 |
| O | 32.002 | 10.998 | 22.33  |
| H | 32.425 | 10.517 | 21.619 |
| H | 31.574 | 11.737 | 21.899 |
| O | 29.855 | 14.696 | 24.663 |
| H | 29.947 | 14.331 | 23.783 |
| H | 29.069 | 15.241 | 24.615 |
| O | 31.889 | 16.56  | 19.452 |
| H | 32.012 | 16.092 | 20.278 |
| H | 31.432 | 17.364 | 19.699 |
| O | 27.763 | 8.742  | 24.655 |
| H | 27.349 | 7.971  | 25.04  |
| H | 28.329 | 8.392  | 23.967 |
| O | 30.544 | 12.556 | 20.427 |
| H | 30.218 | 11.819 | 19.909 |
| H | 30.792 | 13.214 | 19.777 |
| O | 32.612 | 20.608 | 17.136 |
| H | 31.709 | 20.388 | 17.362 |
| H | 32.89  | 19.906 | 16.547 |
| O | 28.345 | 21.116 | 22.423 |
| H | 29.083 | 21.585 | 22.033 |
| H | 27.883 | 20.733 | 21.678 |
| O | 28.626 | 7.578  | 18.14  |
| H | 29.131 | 7.399  | 18.934 |
| H | 27.944 | 6.906  | 18.134 |
| O | 34.025 | 19.389 | 20.825 |
| H | 33.18  | 19.249 | 21.253 |
| H | 33.999 | 18.825 | 20.053 |
| O | 24.737 | 20.209 | 19.019 |
| H | 24.671 | 20.885 | 18.345 |
| H | 23.926 | 19.706 | 18.934 |
| O | 24.407 | 14.872 | 14.057 |

|   |        |        |        |
|---|--------|--------|--------|
| H | 23.679 | 14.548 | 14.587 |
| H | 24.691 | 15.67  | 14.502 |
| O | 27.84  | 14.376 | 19.85  |
| H | 27.952 | 14.292 | 20.797 |
| H | 27.401 | 13.566 | 19.588 |
| O | 29.304 | 15.125 | 15.496 |
| H | 29.712 | 15.071 | 16.36  |
| H | 28.974 | 14.241 | 15.332 |
| O | 30.935 | 23.768 | 18.813 |
| H | 31.045 | 24.586 | 19.299 |
| H | 31.712 | 23.253 | 19.032 |
| O | 22.565 | 11.422 | 7.263  |
| H | 21.77  | 10.969 | 6.982  |
| H | 23.22  | 10.729 | 7.341  |
| O | 30.88  | 7.56   | 16.768 |
| H | 29.99  | 7.73   | 17.076 |
| H | 30.996 | 6.616  | 16.879 |
| O | 30.268 | 23.047 | 21.979 |
| H | 31.187 | 23.245 | 21.797 |
| H | 29.889 | 23.888 | 22.238 |
| O | 27.648 | 21.192 | 16.796 |
| H | 27.35  | 20.499 | 16.206 |
| H | 26.861 | 21.705 | 16.979 |
| O | 29.094 | 23.158 | 15.712 |
| H | 28.684 | 22.32  | 15.928 |
| H | 29.846 | 22.923 | 15.168 |
| O | 32.982 | 14.146 | 13.03  |
| H | 33.495 | 13.501 | 12.543 |
| H | 33.138 | 13.931 | 13.95  |
| O | 24.198 | 19.84  | 23.687 |
| H | 24.475 | 20.696 | 23.361 |
| H | 23.265 | 19.795 | 23.477 |
| O | 27.776 | 19.346 | 29.523 |
| H | 28.367 | 18.91  | 28.909 |
| H | 27.057 | 18.725 | 29.643 |
| O | 31.049 | 20.49  | 23.466 |
| H | 31.305 | 20.855 | 22.619 |
| H | 30.106 | 20.348 | 23.391 |
| O | 33.02  | 19.355 | 24.959 |
| H | 32.359 | 19.651 | 24.333 |
| H | 32.922 | 18.403 | 24.978 |
| O | 34.337 | 17.381 | 18.699 |
| H | 33.413 | 17.138 | 18.745 |
| H | 34.589 | 17.193 | 17.794 |
| O | 36.349 | 14.37  | 16.428 |
| H | 35.776 | 13.647 | 16.683 |
| H | 36.874 | 14.547 | 17.209 |

|   |        |        |        |
|---|--------|--------|--------|
| O | 30.684 | 26.111 | 20.225 |
| H | 30.14  | 25.942 | 20.994 |
| H | 30.563 | 27.043 | 20.045 |
| O | 28.875 | 25.274 | 17.405 |
| H | 29.024 | 24.584 | 16.759 |
| H | 28.96  | 24.832 | 18.25  |
| O | 27.561 | 17.119 | 16.412 |
| H | 27.549 | 17.874 | 15.824 |
| H | 28.209 | 16.527 | 16.028 |
| O | 25.055 | 10.896 | 15.923 |
| H | 24.361 | 10.877 | 15.264 |
| H | 25.56  | 10.099 | 15.762 |
| O | 27.663 | 15.508 | 12.777 |
| H | 28.527 | 15.453 | 12.369 |
| H | 27.845 | 15.681 | 13.701 |
| O | 26.642 | 8.919  | 16.155 |
| H | 27.111 | 8.832  | 15.325 |
| H | 27.2   | 8.476  | 16.794 |
| O | 32.886 | 23.254 | 20.961 |
| H | 33.701 | 22.752 | 20.958 |
| H | 33.126 | 24.103 | 20.589 |
| O | 30.396 | 12.661 | 26.533 |
| H | 29.905 | 13.14  | 27.202 |
| H | 30.326 | 13.206 | 25.749 |
| O | 22.286 | 8.889  | 11.272 |
| H | 23.098 | 9.247  | 10.913 |
| H | 22.562 | 8.394  | 12.043 |
| O | 34.969 | 16.574 | 15.88  |
| H | 35.407 | 15.772 | 16.167 |
| H | 35.513 | 16.901 | 15.163 |
| O | 26.164 | 11.202 | 7.345  |
| H | 25.545 | 10.472 | 7.333  |
| H | 25.8   | 11.815 | 7.984  |
| O | 33.064 | 19.005 | 11.754 |
| H | 33.956 | 19.326 | 11.886 |
| H | 33.051 | 18.7   | 10.847 |
| O | 30.605 | 17.651 | 8.116  |
| H | 29.808 | 18.112 | 7.853  |
| H | 30.494 | 17.497 | 9.054  |
| O | 28.183 | 20.556 | 11.69  |
| H | 27.261 | 20.81  | 11.729 |
| H | 28.556 | 21.113 | 11.007 |
| O | 28.184 | 19.383 | 14.719 |
| H | 27.476 | 19.592 | 14.11  |
| H | 28.984 | 19.585 | 14.233 |
| O | 24.872 | 12.144 | 9.43   |
| H | 24.826 | 12.666 | 10.231 |

|   |        |        |        |
|---|--------|--------|--------|
| H | 23.958 | 11.996 | 9.188  |
| O | 26.832 | 5.189  | 21.622 |
| H | 27.252 | 5.047  | 20.773 |
| H | 27.56  | 5.309  | 22.232 |
| O | 27.915 | 9.266  | 11.271 |
| H | 28.66  | 9.642  | 10.801 |
| H | 28.008 | 8.321  | 11.15  |
| O | 34.216 | 13.143 | 17.637 |
| H | 33.781 | 13.513 | 18.405 |
| H | 33.591 | 12.503 | 17.294 |
| O | 31.702 | 10.129 | 12.535 |
| H | 31.309 | 9.286  | 12.76  |
| H | 32.645 | 9.98   | 12.605 |
| O | 26.913 | 4.285  | 15.371 |
| H | 26.952 | 3.337  | 15.496 |
| H | 27.829 | 4.556  | 15.306 |
| O | 30.626 | 7.601  | 12.479 |
| H | 30.147 | 7.318  | 11.699 |
| H | 31.486 | 7.19   | 12.393 |
| O | 32.572 | 8.073  | 14.925 |
| H | 33.368 | 7.745  | 15.343 |
| H | 31.863 | 7.787  | 15.501 |
| O | 32.539 | 7.536  | 19.134 |
| H | 32.199 | 7.545  | 18.239 |
| H | 33.388 | 7.099  | 19.063 |
| O | 25.355 | 8.517  | 22.306 |
| H | 25.206 | 7.892  | 23.016 |
| H | 26.306 | 8.621  | 22.275 |
| O | 22.716 | 6.274  | 26.162 |
| H | 22.311 | 6.96   | 26.692 |
| H | 22.078 | 6.099  | 25.47  |
| O | 29.441 | 10.867 | 16.12  |
| H | 29.416 | 10.227 | 15.408 |
| H | 28.616 | 11.345 | 16.04  |
| O | 31.122 | 12.532 | 11.065 |
| H | 31.196 | 11.965 | 11.832 |
| H | 32.015 | 12.84  | 10.907 |
| O | 28.552 | 8.795  | 13.93  |
| H | 29.499 | 8.672  | 13.861 |
| H | 28.268 | 8.976  | 13.034 |
| O | 29.73  | 10.361 | 9.699  |
| H | 29.491 | 10.671 | 8.826  |
| H | 30.535 | 10.834 | 9.91   |
| O | 26.718 | 26.606 | 22.365 |
| H | 26.922 | 27.468 | 22.002 |
| H | 25.77  | 26.522 | 22.263 |
| O | 20.485 | 24.189 | 26.946 |

|   |        |        |        |
|---|--------|--------|--------|
| H | 19.824 | 23.499 | 26.989 |
| H | 20.982 | 24.095 | 27.759 |
| O | 21.841 | 25.67  | 24.919 |
| H | 21.461 | 24.958 | 25.433 |
| H | 22.774 | 25.46  | 24.871 |
| O | 23.943 | 26.468 | 22.389 |
| H | 23.24  | 27.114 | 22.464 |
| H | 23.571 | 25.769 | 21.852 |
| O | 12.238 | 24.196 | 24.379 |
| H | 12.264 | 25.01  | 23.876 |
| H | 13.158 | 23.962 | 24.504 |
| O | 13.619 | 27.917 | 18.44  |
| H | 14.291 | 28.521 | 18.757 |
| H | 13.651 | 27.182 | 19.051 |
| O | 18.176 | 26.857 | 16.936 |
| H | 17.888 | 25.989 | 17.218 |
| H | 17.621 | 27.464 | 17.426 |
| O | 13.129 | 20.587 | 24.819 |
| H | 14.035 | 20.781 | 25.059 |
| H | 12.692 | 21.438 | 24.822 |
| O | 8.368  | 24.538 | 22.244 |
| H | 8.26   | 25.485 | 22.33  |
| H | 8.09   | 24.345 | 21.349 |
| O | 14.801 | 26.026 | 20.08  |
| H | 15.168 | 25.155 | 19.923 |
| H | 14.58  | 26.028 | 21.011 |
| O | 11.77  | 26.697 | 27.758 |
| H | 12.281 | 27.238 | 28.36  |
| H | 10.88  | 27.045 | 27.821 |
| O | 16.841 | 21.428 | 19.485 |
| H | 17.664 | 21.307 | 19.96  |
| H | 16.432 | 20.562 | 19.491 |
| O | 14.1   | 25.544 | 16.465 |
| H | 14.254 | 26.406 | 16.851 |
| H | 13.352 | 25.195 | 16.95  |
| O | 22.678 | 29.625 | 16.507 |
| H | 23.225 | 30.276 | 16.946 |
| H | 22.985 | 28.785 | 16.848 |
| O | 19.204 | 28.066 | 13.227 |
| H | 19.892 | 28.232 | 12.582 |
| H | 18.729 | 28.895 | 13.289 |
| O | 15.718 | 25.165 | 8.299  |
| H | 16.584 | 24.811 | 8.1    |
| H | 15.678 | 25.178 | 9.255  |
| O | 11.17  | 29.151 | 21.291 |
| H | 12.004 | 29.4   | 21.69  |
| H | 11.226 | 28.201 | 21.193 |



|   |        |        |        |
|---|--------|--------|--------|
| O | 16.267 | 28.198 | 26.672 |
| H | 16.151 | 27.332 | 26.281 |
| H | 15.448 | 28.656 | 26.485 |
| O | 25.075 | 27.949 | 24.701 |
| H | 25.929 | 27.518 | 24.754 |
| H | 24.626 | 27.503 | 23.984 |
| O | 10.628 | 21.988 | 23.73  |
| H | 11.119 | 22.808 | 23.678 |
| H | 10.072 | 21.992 | 22.95  |
| O | 26.258 | 25.458 | 17.288 |
| H | 27.206 | 25.532 | 17.392 |
| H | 26.119 | 25.466 | 16.341 |
| O | 17.29  | 27.644 | 20.529 |
| H | 17.728 | 27.128 | 21.207 |
| H | 16.63  | 27.052 | 20.168 |
| O | 16.955 | 15.331 | 32.7   |
| H | 16.55  | 15.37  | 33.566 |
| H | 16.453 | 15.951 | 32.171 |
| O | 21.44  | 22.08  | 30.761 |
| H | 22.317 | 22.004 | 30.384 |
| H | 21.373 | 21.338 | 31.362 |
| O | 12.756 | 16.479 | 24.912 |
| H | 13.482 | 16.7   | 25.496 |
| H | 12.671 | 17.239 | 24.337 |
| O | 16.042 | 14.118 | 27.054 |
| H | 15.404 | 14.757 | 26.737 |
| H | 16.134 | 14.312 | 27.986 |
| O | 4.385  | 14.355 | 22.132 |
| H | 4.404  | 14.303 | 21.176 |
| H | 5.022  | 15.036 | 22.348 |
| O | 16.029 | 25.333 | 26.761 |
| H | 16.951 | 25.579 | 26.679 |
| H | 15.939 | 25.037 | 27.667 |
| O | 11.873 | 17.622 | 29.258 |
| H | 11.424 | 17.928 | 28.469 |
| H | 12.778 | 17.482 | 28.979 |
| O | 23.729 | 23.294 | 23.224 |
| H | 24.058 | 24.189 | 23.134 |
| H | 24.062 | 22.838 | 22.451 |
| O | 19.267 | 10.349 | 29.028 |
| H | 18.369 | 10.678 | 28.982 |
| H | 19.722 | 10.973 | 29.593 |
| O | 16.387 | 20.326 | 30.157 |
| H | 16.358 | 20.609 | 31.071 |
| H | 17.16  | 20.758 | 29.797 |
| O | 21.717 | 19.25  | 31.351 |
| H | 22.221 | 19.013 | 30.573 |

|   |        |        |        |
|---|--------|--------|--------|
| H | 21.531 | 18.414 | 31.779 |
| O | 21.773 | 16.589 | 28.207 |
| H | 21.965 | 16.894 | 27.32  |
| H | 22.616 | 16.28  | 28.541 |
| O | 7.472  | 18.784 | 29.415 |
| H | 6.896  | 18.049 | 29.205 |
| H | 7.735  | 18.631 | 30.322 |
| O | 13.558 | 25.662 | 30.212 |
| H | 13.476 | 26.59  | 30.432 |
| H | 13.048 | 25.56  | 29.408 |
| O | 19.811 | 22.199 | 24.228 |
| H | 20.647 | 22.43  | 24.631 |
| H | 19.187 | 22.198 | 24.953 |
| O | 22.458 | 17.144 | 25.325 |
| H | 22.54  | 16.622 | 24.528 |
| H | 23.125 | 17.825 | 25.235 |
| O | 28.235 | 15.187 | 27.246 |
| H | 28.641 | 15.958 | 27.641 |
| H | 28.357 | 15.307 | 26.304 |
| O | 21.999 | 28.447 | 22.887 |
| H | 21.135 | 28.619 | 23.261 |
| H | 22.272 | 29.286 | 22.517 |
| O | 11.937 | 14.865 | 28.668 |
| H | 11.386 | 14.863 | 27.885 |
| H | 11.646 | 15.632 | 29.162 |
| O | 10.115 | 20.572 | 28.846 |
| H | 9.487  | 20.234 | 29.485 |
| H | 10.295 | 19.828 | 28.271 |
| O | 21.743 | 21.82  | 27.681 |
| H | 22.61  | 21.852 | 27.276 |
| H | 21.234 | 21.243 | 27.112 |
| O | 14.851 | 23.762 | 24.915 |
| H | 15.36  | 24.056 | 24.159 |
| H | 15.232 | 24.231 | 25.657 |
| O | 17.235 | 13.891 | 29.551 |
| H | 16.489 | 13.548 | 30.042 |
| H | 17.465 | 14.704 | 30     |
| O | 12.496 | 18.392 | 23.093 |
| H | 12.583 | 19.222 | 23.562 |
| H | 12.739 | 18.6   | 22.191 |
| O | 13.511 | 21.266 | 28.659 |
| H | 12.659 | 21.659 | 28.471 |
| H | 13.674 | 21.478 | 29.579 |
| O | 9.923  | 17.477 | 27.295 |
| H | 9.111  | 17.051 | 27.568 |
| H | 10.363 | 16.827 | 26.747 |
| O | 18.347 | 8.686  | 25.953 |

|   |        |        |        |
|---|--------|--------|--------|
| H | 18.62  | 9.597  | 26.065 |
| H | 18.068 | 8.41   | 26.826 |
| O | 24.758 | 23.037 | 28.812 |
| H | 24.497 | 23.059 | 27.891 |
| H | 25.629 | 22.639 | 28.804 |
| O | 21.843 | 14.029 | 29.919 |
| H | 21.364 | 13.201 | 29.9   |
| H | 21.47  | 14.505 | 30.661 |
| O | 10.883 | 14.903 | 26.04  |
| H | 10.417 | 14.692 | 25.231 |
| H | 11.719 | 15.265 | 25.746 |
| O | 21.655 | 11.816 | 28.049 |
| H | 22.116 | 11.342 | 28.742 |
| H | 22.219 | 11.724 | 27.281 |
| O | 13.533 | 12.733 | 28.119 |
| H | 14.455 | 12.946 | 27.977 |
| H | 13.182 | 13.489 | 28.589 |
| O | 23.935 | 13.857 | 27.143 |
| H | 23.268 | 14.002 | 27.814 |
| H | 24.462 | 14.655 | 27.153 |
| O | 18.692 | 26.056 | 26.329 |
| H | 19.128 | 26.796 | 26.752 |
| H | 19.378 | 25.394 | 26.239 |
| O | 11.851 | 12.855 | 23.124 |
| H | 11.658 | 13.712 | 22.744 |
| H | 12.698 | 12.969 | 23.555 |
| O | 15.626 | 12.123 | 30.89  |
| H | 15.657 | 11.216 | 30.585 |
| H | 14.766 | 12.438 | 30.611 |
| O | 10.014 | 20.59  | 26.179 |
| H | 9.549  | 21.152 | 26.799 |
| H | 10.185 | 21.155 | 25.426 |
| O | 19.394 | 15.833 | 16.886 |
| H | 20.083 | 16.332 | 17.326 |
| H | 18.978 | 15.332 | 17.587 |
| O | 20.054 | 26.94  | 20.282 |
| H | 19.373 | 27.3   | 19.714 |
| H | 19.839 | 26.01  | 20.354 |
| O | 16.945 | 12.623 | 24.602 |
| H | 16.984 | 12.276 | 23.71  |
| H | 17.651 | 12.172 | 25.065 |
| O | 23.37  | 10.671 | 13.931 |
| H | 22.71  | 9.994  | 14.082 |
| H | 22.878 | 11.41  | 13.574 |
| O | 15.044 | 14.239 | 14.849 |
| H | 14.889 | 15.184 | 14.839 |
| H | 15.803 | 14.127 | 15.421 |

|   |        |        |        |
|---|--------|--------|--------|
| O | 17.468 | 17.185 | 14.984 |
| H | 17.92  | 16.542 | 15.53  |
| H | 16.609 | 17.286 | 15.394 |
| O | 14.403 | 16.848 | 15.969 |
| H | 13.948 | 17.67  | 16.154 |
| H | 14.21  | 16.292 | 16.723 |
| O | 15.941 | 22.78  | 28.839 |
| H | 15.971 | 22.046 | 29.452 |
| H | 16.454 | 23.468 | 29.264 |
| O | 25.461 | 27.257 | 19.145 |
| H | 24.532 | 27.278 | 19.375 |
| H | 25.525 | 26.581 | 18.47  |
| O | 25.425 | 11.559 | 27.11  |
| H | 24.902 | 12.36  | 27.139 |
| H | 25.715 | 11.43  | 28.013 |
| O | 18.419 | 5.694  | 17.961 |
| H | 17.904 | 5.222  | 17.306 |
| H | 19.284 | 5.287  | 17.924 |
| O | 25.06  | 21.993 | 21.145 |
| H | 25.996 | 22.109 | 20.98  |
| H | 24.83  | 21.197 | 20.666 |
| O | 29.628 | 17.598 | 10.714 |
| H | 29.801 | 18.391 | 11.222 |
| H | 30.054 | 16.899 | 11.21  |
| O | 17.57  | 13.249 | 16.234 |
| H | 18.437 | 13.654 | 16.246 |
| H | 17.195 | 13.459 | 17.089 |
| O | 15.28  | 15.817 | 12.454 |
| H | 14.861 | 15.48  | 11.662 |
| H | 15.297 | 15.07  | 13.052 |
| O | 21.627 | 12.663 | 13.231 |
| H | 21.25  | 12.924 | 14.071 |
| H | 21.47  | 13.412 | 12.655 |
| O | 17.755 | 15.73  | 25.649 |
| H | 18.607 | 15.4   | 25.932 |
| H | 17.126 | 15.092 | 25.988 |
| O | 18.731 | 22.555 | 17.426 |
| H | 17.984 | 22.738 | 16.856 |
| H | 18.404 | 22.718 | 18.31  |
| O | 16.305 | 13.653 | 9.176  |
| H | 15.683 | 13.996 | 9.818  |
| H | 15.787 | 13.539 | 8.379  |
| O | 14.368 | 13.467 | 21.096 |
| H | 14.669 | 14.215 | 21.613 |
| H | 14.139 | 13.841 | 20.245 |
| O | 22.909 | 23.677 | 16.692 |
| H | 22.302 | 24.379 | 16.929 |

|   |        |        |        |
|---|--------|--------|--------|
| H | 22.394 | 22.875 | 16.78  |
| O | 22.343 | 26.264 | 13.759 |
| H | 21.624 | 26.451 | 13.154 |
| H | 22.138 | 26.778 | 14.54  |
| O | 28.285 | 4.477  | 19.359 |
| H | 29.064 | 4.957  | 19.64  |
| H | 28.469 | 3.566  | 19.587 |
| O | 8.898  | 18.427 | 15.597 |
| H | 9.56   | 19.004 | 15.215 |
| H | 8.079  | 18.693 | 15.179 |
| O | 11.489 | 21.897 | 12.634 |
| H | 12.403 | 21.614 | 12.659 |
| H | 11.531 | 22.85  | 12.711 |
| O | 21.335 | 19.709 | 23.292 |
| H | 20.775 | 20.422 | 23.599 |
| H | 20.725 | 19.007 | 23.064 |
| O | 19.946 | 29.885 | 16.909 |
| H | 20.864 | 29.831 | 16.642 |
| H | 19.97  | 30.307 | 17.768 |
| O | 13.262 | 26.321 | 13.77  |
| H | 13.79  | 27.004 | 14.183 |
| H | 13.563 | 25.508 | 14.176 |
| O | 25.524 | 21.135 | 12.809 |
| H | 25.102 | 20.588 | 12.146 |
| H | 25.298 | 22.031 | 12.559 |
| O | 27.382 | 25.171 | 14.397 |
| H | 27.956 | 24.443 | 14.635 |
| H | 26.543 | 24.758 | 14.194 |
| O | 19.293 | 13.239 | 27.628 |
| H | 18.729 | 13.63  | 28.295 |
| H | 20.128 | 13.096 | 28.074 |
| O | 11.386 | 16.902 | 19.667 |
| H | 10.675 | 17.357 | 19.216 |
| H | 11.773 | 17.567 | 20.236 |
| O | 14.224 | 10.457 | 25.473 |
| H | 13.675 | 10.076 | 24.788 |
| H | 13.607 | 10.898 | 26.057 |
| O | 27.741 | 16.05  | 24.581 |
| H | 26.823 | 16.164 | 24.335 |
| H | 28.205 | 16.731 | 24.094 |
| O | 15.712 | 18.646 | 24.882 |
| H | 16.604 | 18.442 | 24.598 |
| H | 15.821 | 19.333 | 25.539 |
| O | 18.883 | 6.511  | 14.197 |
| H | 19.033 | 5.952  | 14.959 |
| H | 19.752 | 6.635  | 13.816 |
| O | 24.681 | 20.073 | 14.961 |

|   |        |        |        |
|---|--------|--------|--------|
| H | 23.846 | 20.534 | 15.05  |
| H | 25.116 | 20.506 | 14.227 |
| O | 18.261 | 22.005 | 26.323 |
| H | 17.341 | 22.148 | 26.101 |
| H | 18.241 | 21.652 | 27.212 |
| O | 15.03  | 16.584 | 26.547 |
| H | 15.496 | 17.223 | 26.006 |
| H | 14.873 | 17.039 | 27.374 |
| O | 19.257 | 18.968 | 27.196 |
| H | 19.113 | 18.833 | 26.259 |
| H | 19.164 | 18.097 | 27.581 |
| O | 13.242 | 15.061 | 18.782 |
| H | 12.414 | 14.723 | 18.441 |
| H | 13.003 | 15.872 | 19.231 |
| O | 18.487 | 11.278 | 13.645 |
| H | 18.181 | 11.915 | 13     |
| H | 18.748 | 11.807 | 14.399 |
| O | 16.854 | 8.504  | 19.286 |
| H | 17.512 | 8.476  | 19.98  |
| H | 16.016 | 8.472  | 19.748 |
| O | 14.272 | 18.25  | 13.393 |
| H | 14.767 | 17.467 | 13.154 |
| H | 13.532 | 18.261 | 12.786 |
| O | 21.4   | 11.534 | 24.354 |
| H | 22.108 | 10.945 | 24.616 |
| H | 21.833 | 12.373 | 24.195 |
| O | 14.464 | 18.51  | 28.583 |
| H | 13.694 | 19.017 | 28.328 |
| H | 14.964 | 19.1   | 29.147 |
| O | 13.277 | 19.405 | 15.875 |
| H | 13.618 | 19.224 | 14.999 |
| H | 13.859 | 20.078 | 16.225 |
| O | 15.771 | 14.127 | 18.118 |
| H | 16.154 | 14.342 | 18.969 |
| H | 14.88  | 14.475 | 18.163 |
| O | 14.25  | 22.462 | 13.34  |
| H | 14.147 | 22.425 | 12.389 |
| H | 15.019 | 23.016 | 13.476 |
| O | 16.827 | 11.302 | 10.527 |
| H | 17.434 | 11.501 | 11.239 |
| H | 16.743 | 12.126 | 10.047 |
| O | 14.742 | 28.238 | 15.334 |
| H | 14.438 | 28.843 | 16.011 |
| H | 15.695 | 28.235 | 15.425 |
| O | 22.076 | 9.108  | 15.841 |
| H | 22.533 | 9.041  | 16.68  |
| H | 21.422 | 9.793  | 15.978 |

|   |        |        |        |
|---|--------|--------|--------|
| O | 24.223 | 17.423 | 14.731 |
| H | 23.553 | 17.297 | 15.402 |
| H | 24.473 | 18.344 | 14.812 |
| O | 6.718  | 15.743 | 20.562 |
| H | 6.749  | 16.374 | 21.281 |
| H | 7.498  | 15.202 | 20.685 |
| O | 10.755 | 23.099 | 29.429 |
| H | 10.654 | 22.161 | 29.268 |
| H | 10.382 | 23.516 | 28.652 |
| O | 27.991 | 19.053 | 24.709 |
| H | 27.83  | 19.759 | 24.083 |
| H | 27.119 | 18.729 | 24.934 |
| O | 25.571 | 16.088 | 26.879 |
| H | 25.369 | 16.91  | 26.432 |
| H | 26.523 | 16.094 | 26.975 |
| O | 24.569 | 19.77  | 10.825 |
| H | 23.627 | 19.909 | 10.921 |
| H | 24.689 | 18.832 | 10.973 |
| O | 21.065 | 25.826 | 17.148 |
| H | 21.323 | 26.57  | 17.693 |
| H | 20.241 | 26.1   | 16.744 |
| O | 7.429  | 14.828 | 14.904 |
| H | 7.2    | 14.177 | 14.241 |
| H | 8.385  | 14.873 | 14.875 |
| O | 19.662 | 19.241 | 14.753 |
| H | 19.241 | 19.991 | 14.332 |
| H | 18.958 | 18.601 | 14.862 |
| O | 25.015 | 25.077 | 25.389 |
| H | 24.909 | 25.396 | 26.285 |
| H | 25.954 | 25.154 | 25.217 |
| O | 15.648 | 10.447 | 15.077 |
| H | 15.635 | 9.705  | 15.681 |
| H | 16.538 | 10.456 | 14.726 |
| O | 24.255 | 22.071 | 26.165 |
| H | 25.154 | 22.104 | 25.836 |
| H | 23.727 | 22.436 | 25.455 |
| O | 19.663 | 25.389 | 12.536 |
| H | 19.505 | 26.136 | 13.115 |
| H | 19.449 | 25.714 | 11.662 |
| O | 22.74  | 15.438 | 22.947 |
| H | 23.517 | 15.344 | 22.397 |
| H | 22.671 | 14.602 | 23.409 |
| O | 14.287 | 21.072 | 10.769 |
| H | 15.146 | 20.653 | 10.73  |
| H | 14.247 | 21.611 | 9.979  |
| O | 22.303 | 16.254 | 11.052 |
| H | 23.249 | 16.2   | 11.189 |

|   |        |        |        |
|---|--------|--------|--------|
| H | 21.924 | 15.914 | 11.862 |
| O | 16.339 | 23.922 | 16.134 |
| H | 16.628 | 24.337 | 15.322 |
| H | 15.499 | 24.337 | 16.33  |
| O | 21.65  | 19.95  | 11.103 |
| H | 21.479 | 19.292 | 11.777 |
| H | 21.353 | 20.773 | 11.491 |
| O | 16.783 | 20.269 | 14.756 |
| H | 16.29  | 20.474 | 15.55  |
| H | 16.349 | 19.496 | 14.397 |
| O | 20.451 | 13.255 | 15.701 |
| H | 20.65  | 13.928 | 16.352 |
| H | 20.389 | 12.444 | 16.206 |
| O | 24.977 | 13.027 | 11.868 |
| H | 25.252 | 12.3   | 12.426 |
| H | 24.624 | 13.676 | 12.477 |
| O | 18.644 | 13.758 | 12.463 |
| H | 18.538 | 14.559 | 12.976 |
| H | 18.746 | 14.063 | 11.561 |
| O | 16.501 | 15.419 | 20.562 |
| H | 16.026 | 15.502 | 21.388 |
| H | 16.832 | 16.3   | 20.386 |
| O | 27.658 | 10.103 | 21.625 |
| H | 28.235 | 10.275 | 20.881 |
| H | 27.592 | 10.945 | 22.077 |
| O | 25.356 | 22.448 | 17.363 |
| H | 25.957 | 23.193 | 17.351 |
| H | 24.51  | 22.82  | 17.113 |
| O | 24.968 | 14.88  | 21.457 |
| H | 25.063 | 13.947 | 21.268 |
| H | 24.656 | 15.261 | 20.636 |
| O | 16.794 | 19.565 | 10.797 |
| H | 16.91  | 18.774 | 11.323 |
| H | 17.268 | 20.244 | 11.278 |
| O | 9.428  | 18.475 | 18.235 |
| H | 8.496  | 18.538 | 18.445 |
| H | 9.453  | 18.386 | 17.282 |
| O | 30.636 | 22.114 | 13.548 |
| H | 31.534 | 22.436 | 13.618 |
| H | 30.729 | 21.169 | 13.423 |
| O | 21.547 | 23.357 | 21.133 |
| H | 22.255 | 23.657 | 20.563 |
| H | 21.957 | 23.253 | 21.991 |
| O | 12.513 | 25.53  | 9.66   |
| H | 12.422 | 24.893 | 8.952  |
| H | 11.833 | 26.181 | 9.486  |
| O | 15.709 | 27.732 | 22.834 |



|   |        |        |        |
|---|--------|--------|--------|
| H | 16.206 | 28.194 | 22.158 |
| H | 16.316 | 27.07  | 23.166 |
| O | 17.379 | 29.438 | 15.92  |
| H | 18.303 | 29.489 | 16.168 |
| H | 17.258 | 30.157 | 15.3   |
| O | 16.011 | 17.212 | 31.043 |
| H | 15.317 | 17.042 | 30.406 |
| H | 16.788 | 17.379 | 30.51  |
| O | 24.396 | 23.347 | 12.071 |
| H | 24.119 | 24.109 | 11.562 |
| H | 23.629 | 23.12  | 12.597 |
| O | 9.908  | 17.41  | 23.452 |
| H | 10.793 | 17.759 | 23.344 |
| H | 9.347  | 18.185 | 23.484 |
| O | 14.078 | 22.542 | 8.549  |
| H | 14.538 | 23.355 | 8.338  |
| H | 13.169 | 22.71  | 8.303  |
| O | 15.072 | 21.246 | 16.941 |
| H | 15.033 | 21.149 | 17.893 |
| H | 15.506 | 22.088 | 16.804 |
| O | 17.755 | 17.448 | 12.332 |
| H | 18.247 | 17.413 | 13.152 |
| H | 16.93  | 17.005 | 12.528 |
| O | 16.921 | 23.022 | 22.968 |
| H | 16.499 | 23.164 | 22.121 |
| H | 17.771 | 22.638 | 22.751 |
| O | 8.472  | 19.84  | 23.852 |
| H | 8.277  | 20.697 | 23.474 |
| H | 8.95   | 20.037 | 24.658 |
| O | 17.786 | 21.334 | 12.658 |
| H | 17.278 | 22.145 | 12.626 |
| H | 17.52  | 20.917 | 13.477 |
| O | 11.65  | 21.466 | 19.131 |
| H | 12.012 | 20.691 | 18.703 |
| H | 11.042 | 21.833 | 18.489 |
| O | 19.878 | 12.178 | 8.33   |
| H | 20.645 | 12.75  | 8.341  |
| H | 19.732 | 11.955 | 9.249  |
| O | 25.465 | 16.898 | 23.713 |
| H | 25.257 | 16.216 | 23.076 |
| H | 24.796 | 17.568 | 23.574 |
| O | 25.204 | 18.77  | 26.226 |
| H | 24.96  | 19.407 | 25.555 |
| H | 24.691 | 19.022 | 26.994 |
| O | 17.469 | 25.759 | 23.544 |
| H | 17.553 | 24.829 | 23.332 |
| H | 18.056 | 25.889 | 24.288 |

|   |        |        |        |
|---|--------|--------|--------|
| O | 14.927 | 15.308 | 22.925 |
| H | 14.754 | 14.585 | 23.528 |
| H | 14.552 | 16.075 | 23.358 |
| O | 27.736 | 17.219 | 19.315 |
| H | 27.382 | 17.243 | 18.426 |
| H | 27.865 | 16.288 | 19.496 |
| O | 14.371 | 13.497 | 24.665 |
| H | 13.969 | 12.678 | 24.955 |
| H | 15.312 | 13.331 | 24.71  |
| O | 19.094 | 11.327 | 25.729 |
| H | 19.08  | 11.87  | 26.518 |
| H | 19.942 | 11.511 | 25.326 |
| O | 20.257 | 22.752 | 12.421 |
| H | 19.441 | 22.302 | 12.202 |
| H | 19.999 | 23.665 | 12.552 |
| O | 16.52  | 23.984 | 12.622 |
| H | 16.125 | 24.529 | 11.941 |
| H | 17.05  | 24.593 | 13.138 |
| O | 9.36   | 26.219 | 24.548 |
| H | 9.741  | 25.846 | 25.343 |
| H | 8.518  | 25.773 | 24.454 |
| O | 21.31  | 21.552 | 17.118 |
| H | 20.371 | 21.738 | 17.095 |
| H | 21.367 | 20.637 | 17.392 |
| O | 26.912 | 22.294 | 24.819 |
| H | 27.582 | 22.928 | 25.074 |
| H | 27.283 | 21.845 | 24.059 |
| O | 26.128 | 20.794 | 8.596  |
| H | 25.623 | 21.575 | 8.823  |
| H | 25.934 | 20.171 | 9.297  |
| O | 28.098 | 12.063 | 12.714 |
| H | 28.49  | 12.491 | 11.953 |
| H | 27.572 | 11.353 | 12.345 |
| O | 20.386 | 16.855 | 22.874 |
| H | 19.688 | 16.2   | 22.901 |
| H | 21.169 | 16.361 | 22.63  |
| O | 20.219 | 17.398 | 9.613  |
| H | 21.062 | 17.358 | 10.063 |
| H | 19.753 | 16.615 | 9.906  |
| O | 16.815 | 12.151 | 21.77  |
| H | 15.968 | 12.574 | 21.625 |
| H | 17.118 | 11.915 | 20.894 |
| O | 23.346 | 13.405 | 24.485 |
| H | 23.579 | 13.548 | 25.403 |
| H | 24.171 | 13.162 | 24.065 |
| O | 14.298 | 10.813 | 12.508 |
| H | 14.985 | 10.8   | 11.841 |

|   |        |        |        |
|---|--------|--------|--------|
| H | 14.71  | 10.432 | 13.283 |
| O | 27.973 | 19.014 | 7.91   |
| H | 27.322 | 19.715 | 7.966  |
| H | 27.618 | 18.314 | 8.458  |
| O | 8.414  | 13.815 | 22.047 |
| H | 8.693  | 12.915 | 21.88  |
| H | 9.23   | 14.309 | 22.122 |
| O | 27.268 | 12.771 | 15.442 |
| H | 26.34  | 12.54  | 15.396 |
| H | 27.646 | 12.406 | 14.643 |
| O | 20.594 | 10.31  | 22.154 |
| H | 21.357 | 9.739  | 22.06  |
| H | 20.755 | 10.793 | 22.965 |
| O | 29.545 | 13.664 | 8.748  |
| H | 28.742 | 13.678 | 9.268  |
| H | 30.139 | 13.095 | 9.239  |
| O | 23.224 | 6.175  | 17.644 |
| H | 23.777 | 6.187  | 16.863 |
| H | 22.995 | 7.093  | 17.788 |
| O | 19.409 | 24.33  | 19.467 |
| H | 20.177 | 23.984 | 19.922 |
| H | 19.523 | 24.05  | 18.559 |
| O | 7.605  | 10.179 | 21.005 |
| H | 8.263  | 10.849 | 21.186 |
| H | 7.961  | 9.687  | 20.265 |
| O | 15.15  | 23.322 | 20.352 |
| H | 15.685 | 22.545 | 20.191 |
| H | 14.359 | 22.986 | 20.773 |
| O | 22.52  | 22.091 | 13.856 |
| H | 21.633 | 22.215 | 13.52  |
| H | 22.443 | 22.242 | 14.798 |
| O | 18.279 | 15.065 | 22.961 |
| H | 17.794 | 15.164 | 23.781 |
| H | 17.829 | 14.357 | 22.501 |
| O | 15.927 | 8.033  | 16.597 |
| H | 15.802 | 7.089  | 16.502 |
| H | 16.391 | 8.13   | 17.429 |
| O | 28.018 | 22.874 | 19.665 |
| H | 27.946 | 21.926 | 19.553 |
| H | 28.904 | 23.008 | 20.002 |
| O | 17.628 | 25.957 | 14.337 |
| H | 17.759 | 26.13  | 15.27  |
| H | 18.137 | 26.635 | 13.894 |
| O | 18.629 | 18.047 | 24.495 |
| H | 19.425 | 17.798 | 24.027 |
| H | 18.252 | 17.217 | 24.786 |
| O | 19.091 | 21.702 | 21.61  |

|   |        |        |        |
|---|--------|--------|--------|
| H | 19.893 | 21.913 | 21.132 |
| H | 19.386 | 21.511 | 22.501 |
| O | 23.917 | 24.227 | 20.046 |
| H | 24.379 | 23.451 | 20.363 |
| H | 24.368 | 24.46  | 19.235 |
| O | 21.055 | 15.483 | 13.922 |
| H | 20.52  | 14.923 | 14.484 |
| H | 21.497 | 16.077 | 14.529 |
| O | 24.222 | 10.565 | 18.262 |
| H | 24.868 | 9.939  | 18.589 |
| H | 24.551 | 10.82  | 17.4   |
| O | 25.046 | 11.998 | 21.977 |
| H | 25.844 | 12.043 | 22.503 |
| H | 24.907 | 11.062 | 21.832 |
| O | 10.185 | 19.902 | 11.363 |
| H | 10.681 | 20.668 | 11.651 |
| H | 9.446  | 19.854 | 11.969 |
| O | 20.387 | 10.75  | 11.029 |
| H | 20.686 | 11.237 | 11.797 |
| H | 21.093 | 10.129 | 10.849 |
| O | 18.426 | 9.698  | 9.126  |
| H | 19.206 | 9.307  | 9.522  |
| H | 18.13  | 10.342 | 9.769  |
| O | 18.182 | 24.209 | 8.114  |
| H | 18.945 | 24.632 | 8.509  |
| H | 18.506 | 23.359 | 7.818  |
| O | 21.753 | 14.324 | 8.707  |
| H | 21.991 | 14.935 | 9.404  |
| H | 22.481 | 14.373 | 8.087  |
| O | 22.599 | 19.857 | 8.309  |
| H | 22.736 | 20.754 | 8.005  |
| H | 22.329 | 19.952 | 9.222  |
| O | 9.459  | 16.99  | 9.082  |
| H | 8.605  | 16.558 | 9.061  |
| H | 9.255  | 17.925 | 9.078  |
| O | 19.101 | 14.65  | 9.853  |
| H | 18.31  | 14.349 | 9.407  |
| H | 19.813 | 14.432 | 9.253  |
| O | 19.734 | 25.768 | 9.831  |
| H | 20.332 | 25.069 | 9.568  |
| H | 20.129 | 26.567 | 9.481  |
| O | 15.175 | 18.744 | 8.697  |
| H | 15.753 | 18.867 | 9.45   |
| H | 15.604 | 18.066 | 8.174  |
| O | 24.633 | 24.894 | 15.023 |
| H | 24.047 | 24.343 | 15.542 |
| H | 24.047 | 25.426 | 14.484 |

|   |        |        |        |
|---|--------|--------|--------|
| O | 27.14  | 14.032 | 10.141 |
| H | 26.858 | 14.497 | 10.93  |
| H | 26.466 | 13.368 | 10.001 |
| O | 26.89  | 17.52  | 9.823  |
| H | 26.255 | 17.894 | 10.434 |
| H | 27.67  | 17.362 | 10.355 |
| O | 19.228 | 16.616 | 7.143  |
| H | 20.039 | 16.978 | 6.788  |
| H | 19.092 | 17.09  | 7.963  |
| O | 8.073  | 19.293 | 12.916 |
| H | 7.339  | 19.82  | 13.231 |
| H | 7.831  | 18.392 | 13.131 |
| O | 18.504 | 19.38  | 8.678  |
| H | 17.977 | 19.426 | 9.475  |
| H | 19.214 | 18.775 | 8.895  |
| O | 24.323 | 25.463 | 9.965  |
| H | 24.664 | 25.721 | 9.109  |
| H | 23.615 | 26.083 | 10.138 |
| O | 24.171 | 22.829 | 8.747  |
| H | 23.279 | 23.17  | 8.821  |
| H | 24.714 | 23.479 | 9.192  |
| O | 21.244 | 23.78  | 8.287  |
| H | 21.294 | 24.432 | 7.588  |
| H | 20.811 | 23.028 | 7.883  |
| O | 19.924 | 21.603 | 7.612  |
| H | 20.045 | 21.457 | 6.674  |
| H | 19.489 | 20.809 | 7.924  |
| O | 24.135 | 9.013  | 7.504  |
| H | 24.017 | 8.16   | 7.084  |
| H | 24.243 | 8.81   | 8.433  |
| O | 20.533 | 7.791  | 9.143  |
| H | 21.058 | 7.108  | 8.727  |
| H | 20.768 | 7.744  | 10.07  |
| O | 14.962 | 26.232 | 10.749 |
| H | 15.29  | 27.119 | 10.896 |
| H | 14.02  | 26.344 | 10.621 |
| O | 12.377 | 19.602 | 8.232  |
| H | 13.164 | 19.429 | 8.749  |
| H | 12.059 | 20.445 | 8.555  |
| O | 21.656 | 8.536  | 27.858 |
| H | 20.705 | 8.617  | 27.786 |
| H | 21.897 | 9.152  | 28.549 |
| O | 20.104 | 6.795  | 25.015 |
| H | 20.145 | 6.764  | 24.059 |
| H | 19.476 | 7.492  | 25.204 |
| O | 21.823 | 4.798  | 23.765 |
| H | 22.025 | 4.211  | 23.036 |

|   |        |        |        |
|---|--------|--------|--------|
| H | 21.345 | 5.523  | 23.363 |
| O | 22.582 | 8.671  | 21.629 |
| H | 22.293 | 7.763  | 21.724 |
| H | 23.441 | 8.695  | 22.051 |
| O | 19.672 | 12.13  | 20.083 |
| H | 18.909 | 11.736 | 19.661 |
| H | 19.929 | 11.496 | 20.753 |
| O | 25.745 | 8.456  | 19.464 |
| H | 26.1   | 7.602  | 19.219 |
| H | 25.767 | 8.46   | 20.421 |
| O | 14.942 | 7.964  | 12.04  |
| H | 14.351 | 7.747  | 12.761 |
| H | 15.77  | 8.182  | 12.468 |
| O | 25.469 | 4.58   | 12.551 |
| H | 24.865 | 4.327  | 13.25  |
| H | 26.339 | 4.488  | 12.942 |
| O | 12.903 | 8.209  | 16.179 |
| H | 13.744 | 7.755  | 16.229 |
| H | 12.679 | 8.196  | 15.249 |
| O | 20.681 | 4.849  | 17.283 |
| H | 21.085 | 3.984  | 17.214 |
| H | 21.419 | 5.454  | 17.358 |
| O | 14.96  | 5.607  | 16.675 |
| H | 15.424 | 5.202  | 17.408 |
| H | 14.977 | 4.944  | 15.985 |
| O | 24.821 | 6.199  | 15.508 |
| H | 25.311 | 5.466  | 15.136 |
| H | 25.487 | 6.86   | 15.697 |
| O | 20.735 | 10.817 | 17.859 |
| H | 21.253 | 10.076 | 18.174 |
| H | 20.533 | 11.319 | 18.649 |
| O | 15.859 | 5.475  | 21.218 |
| H | 15.249 | 5.051  | 20.614 |
| H | 15.499 | 6.353  | 21.344 |
| O | 20.771 | 5.262  | 12.215 |
| H | 21.477 | 5.904  | 12.298 |
| H | 21.215 | 4.414  | 12.234 |
| O | 18.595 | 4.874  | 20.615 |
| H | 17.733 | 4.934  | 21.028 |
| H | 18.43  | 5.061  | 19.69  |
| O | 22.777 | 7.188  | 13.749 |
| H | 23.243 | 6.495  | 14.218 |
| H | 22.565 | 7.833  | 14.424 |
| O | 22.325 | 8.632  | 18.507 |
| H | 23.08  | 9.21   | 18.608 |
| H | 21.889 | 8.655  | 19.359 |
| O | 15.022 | 8.21   | 21.62  |

|   |        |        |        |
|---|--------|--------|--------|
| H | 15.405 | 8.711  | 22.34  |
| H | 14.179 | 8.633  | 21.456 |
| O | 23.142 | 5.674  | 20.23  |
| H | 23.876 | 6.209  | 20.531 |
| H | 23.16  | 5.756  | 19.277 |
| O | 17.461 | 8.619  | 13.175 |
| H | 17.91  | 8.001  | 13.751 |
| H | 17.992 | 9.414  | 13.216 |
| O | 16.549 | 9.056  | 23.942 |
| H | 17.251 | 8.693  | 24.482 |
| H | 16.269 | 9.842  | 24.409 |
| O | 19.849 | 6.507  | 22.403 |
| H | 19.182 | 7.037  | 21.965 |
| H | 19.777 | 5.645  | 21.994 |
| O | 13.207 | 10.901 | 16.462 |
| H | 13.966 | 10.894 | 15.878 |
| H | 12.945 | 9.983  | 16.526 |
| O | 23.406 | 10.236 | 25.781 |
| H | 23.432 | 9.436  | 26.307 |
| H | 24.233 | 10.677 | 25.974 |
| O | 24.848 | 9.495  | 10.383 |
| H | 24.994 | 10.398 | 10.1   |
| H | 25.694 | 9.213  | 10.73  |
| O | 18.294 | 8.698  | 21.634 |
| H | 19.002 | 9.278  | 21.914 |
| H | 17.596 | 8.848  | 22.271 |
| O | 30.401 | 5.99   | 20.707 |
| H | 31.337 | 6.172  | 20.791 |
| H | 30.087 | 5.927  | 21.609 |
| O | 27.262 | 11.494 | 24.43  |
| H | 26.724 | 11.713 | 25.191 |
| H | 27.418 | 10.553 | 24.51  |
| O | 16.553 | 11.125 | 27.716 |
| H | 16.055 | 10.917 | 26.925 |
| H | 16.725 | 12.064 | 27.651 |
| O | 18.636 | 14.472 | 19.061 |
| H | 19.069 | 13.674 | 19.365 |
| H | 18.005 | 14.68  | 19.751 |
| O | 26.295 | 5.941  | 18.23  |
| H | 25.431 | 5.529  | 18.237 |
| H | 26.908 | 5.213  | 18.332 |
| O | 17.242 | 11.293 | 18.992 |
| H | 17.164 | 10.418 | 18.613 |
| H | 16.411 | 11.72  | 18.781 |
| O | 11.883 | 15.87  | 9.605  |
| H | 12.188 | 16.476 | 10.28  |
| H | 11.015 | 16.195 | 9.365  |

|   |        |        |        |
|---|--------|--------|--------|
| O | 24.303 | 15.474 | 8.769  |
| H | 24.325 | 16.277 | 8.249  |
| H | 25.183 | 15.403 | 9.137  |
| O | 10.345 | 24.772 | 26.483 |
| H | 10.794 | 24.263 | 25.808 |
| H | 11.047 | 25.231 | 26.943 |
| O | 6.743  | 23.957 | 24.422 |
| H | 7.142  | 23.753 | 25.268 |
| H | 7.408  | 23.714 | 23.778 |
| O | 4.606  | 20.151 | 25.387 |
| H | 5.257  | 20.411 | 26.038 |
| H | 4.765  | 19.218 | 25.248 |
| O | 11.233 | 24.062 | 21.261 |
| H | 10.486 | 23.476 | 21.134 |
| H | 11.931 | 23.493 | 21.584 |
| O | 9.48   | 27.556 | 15.717 |
| H | 10.067 | 26.861 | 15.418 |
| H | 9.744  | 27.719 | 16.622 |
| O | 11.536 | 26.417 | 22.465 |
| H | 10.698 | 26.726 | 22.807 |
| H | 11.308 | 25.667 | 21.915 |
| O | 7.942  | 27.289 | 21.811 |
| H | 7.106  | 26.846 | 21.668 |
| H | 7.809  | 28.17  | 21.461 |
| O | 7.57   | 23.724 | 19.557 |
| H | 6.861  | 23.086 | 19.479 |
| H | 7.503  | 24.255 | 18.763 |
| O | 9.281  | 21.829 | 21.265 |
| H | 8.698  | 22.45  | 20.829 |
| H | 9.496  | 21.187 | 20.588 |
| O | 10.03  | 27.47  | 19.351 |
| H | 9.481  | 28.238 | 19.507 |
| H | 9.7    | 26.811 | 19.962 |
| O | 8.322  | 22.971 | 26.654 |
| H | 7.712  | 23.213 | 27.351 |
| H | 8.996  | 23.651 | 26.679 |
| O | 7.694  | 13.829 | 26.977 |
| H | 6.99   | 13.731 | 26.335 |
| H | 8.345  | 14.375 | 26.537 |
| O | 7.121  | 15.997 | 28.933 |
| H | 6.785  | 15.262 | 28.42  |
| H | 6.596  | 15.99  | 29.733 |
| O | 3.119  | 18.475 | 18.734 |
| H | 3.746  | 17.906 | 18.288 |
| H | 2.54   | 18.786 | 18.038 |
| O | 3.798  | 21.594 | 23.096 |
| H | 3.677  | 20.919 | 22.428 |



|   |        |        |        |
|---|--------|--------|--------|
| H | 4.474  | 21.241 | 23.674 |
| O | 19.124 | 16.275 | 29.635 |
| H | 19.402 | 15.702 | 30.349 |
| H | 19.934 | 16.501 | 29.179 |
| O | 11.99  | 9.548  | 24.076 |
| H | 11.727 | 10.048 | 23.304 |
| H | 11.218 | 9.557  | 24.642 |
| O | 11.687 | 17.244 | 31.975 |
| H | 11.846 | 17.457 | 31.055 |
| H | 10.755 | 17.029 | 32.013 |
| O | 10.627 | 16.069 | 14.79  |
| H | 10.043 | 16.794 | 15.01  |
| H | 11.485 | 16.478 | 14.678 |
| O | 7.258  | 25.223 | 17.33  |
| H | 7.475  | 26.051 | 17.759 |
| H | 6.914  | 25.48  | 16.474 |
| O | 7.461  | 13.033 | 12.694 |
| H | 7.663  | 12.851 | 11.777 |
| H | 7.797  | 12.273 | 13.17  |
| O | 4.969  | 14.157 | 19.343 |
| H | 5.51   | 14.933 | 19.496 |
| H | 5.238  | 13.844 | 18.479 |
| O | 5.269  | 16.773 | 17.728 |
| H | 5.056  | 17.109 | 16.857 |
| H | 5.421  | 15.838 | 17.593 |
| O | 6.669  | 17.421 | 14.285 |
| H | 5.782  | 17.404 | 14.643 |
| H | 7.076  | 16.619 | 14.614 |
| O | 3.784  | 19.597 | 21.196 |
| H | 3.605  | 19.147 | 20.371 |
| H | 3.726  | 18.91  | 21.861 |
| O | 6.793  | 20.993 | 16.992 |
| H | 7.708  | 21.26  | 17.083 |
| H | 6.708  | 20.232 | 17.566 |
| O | 10.889 | 20.232 | 15.06  |
| H | 10.994 | 20.785 | 14.286 |
| H | 11.766 | 20.18  | 15.439 |
| O | 6.589  | 20.397 | 27.023 |
| H | 7.251  | 21.087 | 27.054 |
| H | 6.629  | 19.987 | 27.887 |
| O | 10.311 | 13.591 | 14.341 |
| H | 11.167 | 13.391 | 13.961 |
| H | 10.27  | 14.547 | 14.347 |
| O | 22.708 | 27.764 | 19.976 |
| H | 23.029 | 28.05  | 20.831 |
| H | 21.756 | 27.738 | 20.074 |
| O | 15.493 | 21.324 | 26.146 |

|   |        |        |        |
|---|--------|--------|--------|
| H | 15.28  | 22.159 | 25.728 |
| H | 15.233 | 21.441 | 27.059 |
| O | 4.572  | 17.526 | 26.449 |
| H | 4.46   | 16.583 | 26.567 |
| H | 3.879  | 17.918 | 26.982 |
| O | 9.923  | 11.473 | 21.452 |
| H | 10.413 | 11.212 | 20.673 |
| H | 10.595 | 11.737 | 22.08  |
| O | 9.436  | 21.342 | 17.242 |
| H | 9.867  | 22.169 | 17.025 |
| H | 9.86   | 20.696 | 16.678 |
| O | 6.216  | 20.945 | 14.084 |
| H | 5.983  | 20.699 | 14.979 |
| H | 6.268  | 21.9   | 14.103 |
| O | 12.158 | 18.656 | 26.6   |
| H | 11.225 | 18.793 | 26.439 |
| H | 12.596 | 19.249 | 25.989 |
| O | 10.421 | 24.811 | 14.196 |
| H | 10.087 | 25.32  | 13.456 |
| H | 11.367 | 24.955 | 14.177 |
| O | 13.184 | 21.666 | 21.343 |
| H | 13.397 | 20.762 | 21.574 |
| H | 12.751 | 21.6   | 20.492 |
| O | 16.458 | 16.79  | 6.819  |
| H | 16.051 | 17.121 | 6.019  |
| H | 17.349 | 16.558 | 6.557  |
| O | 8.511  | 15.399 | 24.713 |
| H | 8.957  | 16.163 | 24.349 |
| H | 7.882  | 15.144 | 24.038 |
| O | 8.856  | 11.454 | 17.814 |
| H | 9.752  | 11.453 | 18.151 |
| H | 8.62   | 12.381 | 17.765 |
| O | 11.364 | 11.877 | 18.304 |
| H | 11.246 | 12.788 | 18.033 |
| H | 12.181 | 11.607 | 17.884 |
| O | 11.853 | 25.183 | 18.281 |
| H | 11.887 | 24.91  | 19.198 |
| H | 11.671 | 26.122 | 18.318 |
| O | 5.727  | 16.408 | 23.623 |
| H | 4.838  | 16.737 | 23.752 |
| H | 6.176  | 16.598 | 24.447 |
| O | 8.719  | 11.419 | 14.191 |
| H | 8.544  | 10.991 | 15.029 |
| H | 9.495  | 11.956 | 14.354 |
| O | 6.503  | 23.859 | 13.896 |
| H | 7.332  | 23.712 | 14.352 |
| H | 6.243  | 24.744 | 14.152 |

|   |        |        |        |
|---|--------|--------|--------|
| O | 13.069 | 12.808 | 13.633 |
| H | 13.689 | 12.119 | 13.395 |
| H | 13.468 | 13.241 | 14.388 |
| O | 6.632  | 18.898 | 19.134 |
| H | 6.882  | 18.464 | 19.949 |
| H | 6.162  | 18.226 | 18.64  |
| O | 4.124  | 21.273 | 16.129 |
| H | 3.35   | 21.534 | 16.628 |
| H | 4.86   | 21.629 | 16.627 |
| O | 10.827 | 15.006 | 21.802 |
| H | 11.27  | 15.512 | 21.121 |
| H | 10.502 | 15.664 | 22.417 |
| O | 11.4   | 11.911 | 26.723 |
| H | 12.157 | 12.312 | 27.149 |
| H | 11.041 | 12.605 | 26.17  |
| O | 3.261  | 17.644 | 23.186 |
| H | 2.591  | 17.011 | 22.925 |
| H | 2.892  | 18.08  | 23.954 |
| O | 11.083 | 14.387 | 17.521 |
| H | 10.829 | 15.24  | 17.873 |
| H | 11.042 | 14.498 | 16.572 |
| O | 5.413  | 14.961 | 12.896 |
| H | 5.8    | 14.634 | 12.084 |
| H | 6.119  | 15.452 | 13.317 |
| O | 13.664 | 10.862 | 21.141 |
| H | 13.498 | 10.818 | 20.199 |
| H | 13.795 | 11.794 | 21.317 |
| O | 10.412 | 23.596 | 16.652 |
| H | 10.728 | 24.219 | 17.306 |
| H | 10.385 | 24.097 | 15.837 |
| O | 7.234  | 18.164 | 22.144 |
| H | 7.628  | 18.837 | 22.698 |
| H | 6.779  | 17.586 | 22.756 |
| O | 5.534  | 13.837 | 16.786 |
| H | 6.369  | 13.912 | 16.323 |
| H | 4.893  | 13.663 | 16.096 |
| O | 9.675  | 23.694 | 10.775 |
| H | 9.012  | 23.8   | 10.092 |
| H | 9.783  | 24.572 | 11.142 |
| O | 5.391  | 21.911 | 19.72  |
| H | 5.166  | 21.406 | 20.501 |
| H | 5.839  | 21.286 | 19.15  |
| O | 12.741 | 18.302 | 11.121 |
| H | 11.822 | 18.561 | 11.053 |
| H | 13.228 | 19.063 | 10.804 |
| O | 8.687  | 16.129 | 12.3   |
| H | 8.632  | 16.325 | 11.364 |

|   |        |        |        |
|---|--------|--------|--------|
| H | 8.437  | 15.207 | 12.366 |
| O | 14.027 | 13.954 | 10.726 |
| H | 13.286 | 14.48  | 10.426 |
| H | 13.64  | 13.308 | 11.316 |

**Table S16. PYP chromophore + 487 waters**

| <b>Method</b>   | <b>Time(s)</b> | <b>iterations</b> | <b>E(eV)</b> | <b>f</b>   |
|-----------------|----------------|-------------------|--------------|------------|
| <b>CIS</b>      | <b>1221.2</b>  | <b>12</b>         | <b>3.65</b>  | <b>1.6</b> |
| <b>TD-BLYP</b>  | <b>-</b>       | <b>-</b>          | <b>-</b>     | <b>-</b>   |
| <b>TD-B3LYP</b> | <b>1218.7</b>  | <b>7</b>          | <b>0.05</b>  | <b>0.0</b> |

|   |        |        |        |
|---|--------|--------|--------|
| C | 22.967 | 16.81  | 19.507 |
| C | 24.27  | 16.774 | 18.931 |
| C | 24.617 | 15.671 | 18.139 |
| C | 23.681 | 14.66  | 17.949 |
| C | 22.419 | 14.608 | 18.558 |
| C | 22.092 | 15.731 | 19.368 |
| S | 22.3   | 18.226 | 20.373 |
| C | 21.107 | 18.737 | 19.24  |
| C | 19.881 | 18.611 | 19.724 |
| O | 21.503 | 18.978 | 18.056 |
| C | 18.678 | 18.857 | 18.895 |
| C | 17.412 | 18.7   | 19.379 |
| C | 16.267 | 18.768 | 18.424 |
| C | 15.007 | 18.753 | 18.949 |
| C | 14.627 | 18.622 | 20.339 |
| C | 15.744 | 18.498 | 21.241 |
| C | 17.075 | 18.511 | 20.793 |
| O | 13.416 | 18.649 | 20.62  |
| H | 25.016 | 17.532 | 19.156 |
| H | 25.561 | 15.727 | 17.603 |
| H | 23.959 | 13.891 | 17.234 |
| H | 21.774 | 13.742 | 18.433 |
| H | 21.138 | 15.665 | 19.885 |
| H | 19.762 | 18.159 | 20.708 |
| H | 18.901 | 19.227 | 17.895 |
| H | 16.528 | 18.974 | 17.391 |
| H | 14.139 | 18.825 | 18.303 |
| H | 15.6   | 18.345 | 22.305 |
| H | 17.886 | 18.502 | 21.514 |
| O | 29.182 | 25.39  | 22.779 |
| H | 29.281 | 25.376 | 23.731 |
| H | 28.342 | 25.825 | 22.632 |
| O | 27.666 | 29.01  | 16.826 |
| H | 26.744 | 28.833 | 17.014 |
| H | 28.124 | 28.779 | 17.634 |
| O | 29.551 | 22.926 | 11.032 |
| H | 30.104 | 23.7   | 10.923 |
| H | 29.77  | 22.597 | 11.904 |
| O | 25.88  | 25.718 | 28.046 |
| H | 25.602 | 26.061 | 28.895 |
| H | 25.875 | 24.767 | 28.158 |

|   |        |        |        |
|---|--------|--------|--------|
| O | 33.894 | 22.795 | 16.377 |
| H | 34.33  | 22.95  | 17.215 |
| H | 33.272 | 22.09  | 16.558 |
| O | 30.112 | 21.211 | 18.047 |
| H | 30.308 | 22.125 | 18.252 |
| H | 29.292 | 21.246 | 17.554 |
| O | 24.075 | 15.499 | 29.422 |
| H | 24.789 | 14.887 | 29.603 |
| H | 23.281 | 15.008 | 29.631 |
| O | 26.423 | 14.107 | 29.296 |
| H | 26.561 | 13.165 | 29.395 |
| H | 26.809 | 14.318 | 28.445 |
| O | 27.383 | 22.332 | 28.542 |
| H | 28.134 | 22.88  | 28.772 |
| H | 27.568 | 21.487 | 28.951 |
| O | 25.825 | 17.56  | 30.061 |
| H | 25.435 | 16.932 | 29.452 |
| H | 25.968 | 17.058 | 30.863 |
| O | 28.391 | 13.11  | 22.223 |
| H | 29.252 | 12.971 | 21.829 |
| H | 28.33  | 12.444 | 22.907 |
| O | 31.475 | 22.004 | 26.329 |
| H | 31.137 | 21.63  | 27.143 |
| H | 31.181 | 21.401 | 25.647 |
| O | 31.852 | 17.267 | 28.442 |
| H | 32.534 | 17.817 | 28.058 |
| H | 32.119 | 17.156 | 29.355 |
| O | 29.307 | 17.709 | 27.704 |
| H | 30.224 | 17.766 | 27.973 |
| H | 29.295 | 18.067 | 26.817 |
| O | 33.709 | 17.406 | 9.427  |
| H | 34.618 | 17.29  | 9.703  |
| H | 33.76  | 17.531 | 8.48   |
| O | 24.938 | 16.847 | 11.925 |
| H | 24.601 | 17.235 | 12.732 |
| H | 25.689 | 16.325 | 12.206 |
| O | 32.469 | 14.752 | 21.385 |
| H | 33.348 | 14.759 | 21.766 |
| H | 32.195 | 13.836 | 21.431 |
| O | 30.816 | 19.132 | 13.418 |
| H | 30.974 | 18.346 | 13.94  |
| H | 31.54  | 19.153 | 12.792 |
| O | 30.284 | 15.257 | 11.884 |
| H | 31.234 | 15.279 | 11.994 |
| H | 30.077 | 14.33  | 11.768 |
| O | 36.186 | 20.699 | 18.464 |
| H | 36.55  | 20.393 | 19.295 |

|   |        |        |        |
|---|--------|--------|--------|
| H | 35.267 | 20.432 | 18.492 |
| O | 32.263 | 11.353 | 17.063 |
| H | 32.41  | 10.514 | 17.499 |
| H | 31.311 | 11.441 | 17.027 |
| O | 33.28  | 18.588 | 15.193 |
| H | 33.815 | 17.822 | 15.401 |
| H | 32.532 | 18.235 | 14.713 |
| O | 33.563 | 9.022  | 21.216 |
| H | 34.106 | 9.499  | 20.588 |
| H | 32.971 | 8.501  | 20.675 |
| O | 26.315 | 12.269 | 19.428 |
| H | 25.586 | 12.142 | 20.035 |
| H | 26.005 | 11.901 | 18.601 |
| O | 24.721 | 18.014 | 7.559  |
| H | 23.933 | 18.514 | 7.772  |
| H | 25.27  | 18.627 | 7.07   |
| O | 29.689 | 10.354 | 19.041 |
| H | 30.009 | 9.628  | 18.504 |
| H | 28.925 | 10.684 | 18.568 |
| O | 31.465 | 16.672 | 14.469 |
| H | 32.168 | 16.029 | 14.378 |
| H | 30.721 | 16.168 | 14.799 |
| O | 34.923 | 10.571 | 19.564 |
| H | 35.348 | 10.322 | 18.743 |
| H | 35.619 | 10.977 | 20.08  |
| O | 30.751 | 18.966 | 19.536 |
| H | 30.85  | 19.768 | 19.022 |
| H | 29.824 | 18.742 | 19.454 |
| O | 21.624 | 17.545 | 15.698 |
| H | 21.844 | 17.862 | 16.574 |
| H | 21.068 | 18.23  | 15.328 |
| O | 27.301 | 20.143 | 19.909 |
| H | 26.457 | 20.142 | 19.458 |
| H | 27.68  | 19.287 | 19.713 |
| O | 32.002 | 10.998 | 22.33  |
| H | 32.425 | 10.517 | 21.619 |
| H | 31.574 | 11.737 | 21.899 |
| O | 29.855 | 14.696 | 24.663 |
| H | 29.947 | 14.331 | 23.783 |
| H | 29.069 | 15.241 | 24.615 |
| O | 31.889 | 16.56  | 19.452 |
| H | 32.012 | 16.092 | 20.278 |
| H | 31.432 | 17.364 | 19.699 |
| O | 27.763 | 8.742  | 24.655 |
| H | 27.349 | 7.971  | 25.04  |
| H | 28.329 | 8.392  | 23.967 |
| O | 30.544 | 12.556 | 20.427 |

|   |        |        |        |
|---|--------|--------|--------|
| H | 30.218 | 11.819 | 19.909 |
| H | 30.792 | 13.214 | 19.777 |
| O | 32.612 | 20.608 | 17.136 |
| H | 31.709 | 20.388 | 17.362 |
| H | 32.89  | 19.906 | 16.547 |
| O | 28.345 | 21.116 | 22.423 |
| H | 29.083 | 21.585 | 22.033 |
| H | 27.883 | 20.733 | 21.678 |
| O | 28.626 | 7.578  | 18.14  |
| H | 29.131 | 7.399  | 18.934 |
| H | 27.944 | 6.906  | 18.134 |
| O | 34.025 | 19.389 | 20.825 |
| H | 33.18  | 19.249 | 21.253 |
| H | 33.999 | 18.825 | 20.053 |
| O | 24.737 | 20.209 | 19.019 |
| H | 24.671 | 20.885 | 18.345 |
| H | 23.926 | 19.706 | 18.934 |
| O | 24.407 | 14.872 | 14.057 |
| H | 23.679 | 14.548 | 14.587 |
| H | 24.691 | 15.67  | 14.502 |
| O | 27.84  | 14.376 | 19.85  |
| H | 27.952 | 14.292 | 20.797 |
| H | 27.401 | 13.566 | 19.588 |
| O | 29.304 | 15.125 | 15.496 |
| H | 29.712 | 15.071 | 16.36  |
| H | 28.974 | 14.241 | 15.332 |
| O | 30.935 | 23.768 | 18.813 |
| H | 31.045 | 24.586 | 19.299 |
| H | 31.712 | 23.253 | 19.032 |
| O | 22.565 | 11.422 | 7.263  |
| H | 21.77  | 10.969 | 6.982  |
| H | 23.22  | 10.729 | 7.341  |
| O | 33.966 | 14.561 | 9.506  |
| H | 33.515 | 15.401 | 9.592  |
| H | 34.874 | 14.796 | 9.311  |
| O | 30.88  | 7.56   | 16.768 |
| H | 29.99  | 7.73   | 17.076 |
| H | 30.996 | 6.616  | 16.879 |
| O | 29.02  | 27.364 | 13.686 |
| H | 29.65  | 27.404 | 14.405 |
| H | 28.385 | 26.702 | 13.96  |
| O | 30.268 | 23.047 | 21.979 |
| H | 31.187 | 23.245 | 21.797 |
| H | 29.889 | 23.888 | 22.238 |
| O | 27.648 | 21.192 | 16.796 |
| H | 27.35  | 20.499 | 16.206 |
| H | 26.861 | 21.705 | 16.979 |



|   |        |        |        |
|---|--------|--------|--------|
| O | 29.094 | 23.158 | 15.712 |
| H | 28.684 | 22.32  | 15.928 |
| H | 29.846 | 22.923 | 15.168 |
| O | 34.864 | 20.878 | 14.109 |
| H | 35.24  | 20.289 | 13.454 |
| H | 34.281 | 20.321 | 14.625 |
| O | 32.982 | 14.146 | 13.03  |
| H | 33.495 | 13.501 | 12.543 |
| H | 33.138 | 13.931 | 13.95  |
| O | 24.198 | 19.84  | 23.687 |
| H | 24.475 | 20.696 | 23.361 |
| H | 23.265 | 19.795 | 23.477 |
| O | 27.776 | 19.346 | 29.523 |
| H | 28.367 | 18.91  | 28.909 |
| H | 27.057 | 18.725 | 29.643 |
| O | 31.049 | 20.49  | 23.466 |
| H | 31.305 | 20.855 | 22.619 |
| H | 30.106 | 20.348 | 23.391 |
| O | 33.02  | 19.355 | 24.959 |
| H | 32.359 | 19.651 | 24.333 |
| H | 32.922 | 18.403 | 24.978 |
| O | 34.337 | 17.381 | 18.699 |
| H | 33.413 | 17.138 | 18.745 |
| H | 34.589 | 17.193 | 17.794 |
| O | 36.349 | 14.37  | 16.428 |
| H | 35.776 | 13.647 | 16.683 |
| H | 36.874 | 14.547 | 17.209 |
| O | 30.684 | 26.111 | 20.225 |
| H | 30.14  | 25.942 | 20.994 |
| H | 30.563 | 27.043 | 20.045 |
| O | 28.875 | 25.274 | 17.405 |
| H | 29.024 | 24.584 | 16.759 |
| H | 28.96  | 24.832 | 18.25  |
| O | 27.561 | 17.119 | 16.412 |
| H | 27.549 | 17.874 | 15.824 |
| H | 28.209 | 16.527 | 16.028 |
| O | 25.055 | 10.896 | 15.923 |
| H | 24.361 | 10.877 | 15.264 |
| H | 25.56  | 10.099 | 15.762 |
| O | 27.663 | 15.508 | 12.777 |
| H | 28.527 | 15.453 | 12.369 |
| H | 27.845 | 15.681 | 13.701 |
| O | 26.642 | 8.919  | 16.155 |
| H | 27.111 | 8.832  | 15.325 |
| H | 27.2   | 8.476  | 16.794 |
| O | 32.886 | 23.254 | 20.961 |
| H | 33.701 | 22.752 | 20.958 |

|   |        |        |        |
|---|--------|--------|--------|
| H | 33.126 | 24.103 | 20.589 |
| O | 30.396 | 12.661 | 26.533 |
| H | 29.905 | 13.14  | 27.202 |
| H | 30.326 | 13.206 | 25.749 |
| O | 30.413 | 27.058 | 16.275 |
| H | 29.895 | 26.477 | 16.832 |
| H | 31.257 | 26.616 | 16.186 |
| O | 22.286 | 8.889  | 11.272 |
| H | 23.098 | 9.247  | 10.913 |
| H | 22.562 | 8.394  | 12.043 |
| O | 34.969 | 16.574 | 15.88  |
| H | 35.407 | 15.772 | 16.167 |
| H | 35.513 | 16.901 | 15.163 |
| O | 26.164 | 11.202 | 7.345  |
| H | 25.545 | 10.472 | 7.333  |
| H | 25.8   | 11.815 | 7.984  |
| O | 32.535 | 25.399 | 16.466 |
| H | 32.791 | 25.655 | 17.352 |
| H | 33.049 | 24.612 | 16.286 |
| O | 27.272 | 23.704 | 9.485  |
| H | 26.778 | 24.292 | 10.057 |
| H | 28.073 | 23.512 | 9.972  |
| O | 33.233 | 22.995 | 13.617 |
| H | 33.86  | 22.392 | 13.218 |
| H | 33.294 | 22.817 | 14.555 |
| O | 33.064 | 19.005 | 11.754 |
| H | 33.956 | 19.326 | 11.886 |
| H | 33.051 | 18.7   | 10.847 |
| O | 30.605 | 17.651 | 8.116  |
| H | 29.808 | 18.112 | 7.853  |
| H | 30.494 | 17.497 | 9.054  |
| O | 31.29  | 15.336 | 7.075  |
| H | 31.237 | 16.239 | 7.387  |
| H | 30.501 | 14.916 | 7.417  |
| O | 28.183 | 20.556 | 11.69  |
| H | 27.261 | 20.81  | 11.729 |
| H | 28.556 | 21.113 | 11.007 |
| O | 28.184 | 19.383 | 14.719 |
| H | 27.476 | 19.592 | 14.11  |
| H | 28.984 | 19.585 | 14.233 |
| O | 24.872 | 12.144 | 9.43   |
| H | 24.826 | 12.666 | 10.231 |
| H | 23.958 | 11.996 | 9.188  |
| O | 29.221 | 6.522  | 10.379 |
| H | 28.456 | 5.947  | 10.342 |
| H | 29.57  | 6.513  | 9.487  |
| O | 33.971 | 12.512 | 11.025 |

|   |        |        |        |
|---|--------|--------|--------|
| H | 34.129 | 13.342 | 10.575 |
| H | 34.285 | 11.845 | 10.414 |
| O | 34.115 | 11.559 | 24.22  |
| H | 33.339 | 11.165 | 23.821 |
| H | 33.861 | 11.723 | 25.128 |
| O | 29.064 | 5.922  | 23.31  |
| H | 29.919 | 5.734  | 23.696 |
| H | 28.435 | 5.683  | 23.992 |
| O | 26.832 | 5.189  | 21.622 |
| H | 27.252 | 5.047  | 20.773 |
| H | 27.56  | 5.309  | 22.232 |
| O | 27.915 | 9.266  | 11.271 |
| H | 28.66  | 9.642  | 10.801 |
| H | 28.008 | 8.321  | 11.15  |
| O | 29.43  | 4.772  | 14.03  |
| H | 30.115 | 5.18   | 14.559 |
| H | 29.462 | 5.24   | 13.195 |
| O | 34.216 | 13.143 | 17.637 |
| H | 33.781 | 13.513 | 18.405 |
| H | 33.591 | 12.503 | 17.294 |
| O | 31.702 | 10.129 | 12.535 |
| H | 31.309 | 9.286  | 12.76  |
| H | 32.645 | 9.98   | 12.605 |
| O | 26.913 | 4.285  | 15.371 |
| H | 26.952 | 3.337  | 15.496 |
| H | 27.829 | 4.556  | 15.306 |
| O | 30.626 | 7.601  | 12.479 |
| H | 30.147 | 7.318  | 11.699 |
| H | 31.486 | 7.19   | 12.393 |
| O | 32.572 | 8.073  | 14.925 |
| H | 33.368 | 7.745  | 15.343 |
| H | 31.863 | 7.787  | 15.501 |
| O | 32.539 | 7.536  | 19.134 |
| H | 32.199 | 7.545  | 18.239 |
| H | 33.388 | 7.099  | 19.063 |
| O | 25.355 | 8.517  | 22.306 |
| H | 25.206 | 7.892  | 23.016 |
| H | 26.306 | 8.621  | 22.275 |
| O | 22.716 | 6.274  | 26.162 |
| H | 22.311 | 6.96   | 26.692 |
| H | 22.078 | 6.099  | 25.47  |
| O | 29.441 | 10.867 | 16.12  |
| H | 29.416 | 10.227 | 15.408 |
| H | 28.616 | 11.345 | 16.04  |
| O | 31.122 | 12.532 | 11.065 |
| H | 31.196 | 11.965 | 11.832 |
| H | 32.015 | 12.84  | 10.907 |

|   |        |        |        |
|---|--------|--------|--------|
| O | 28.552 | 8.795  | 13.93  |
| H | 29.499 | 8.672  | 13.861 |
| H | 28.268 | 8.976  | 13.034 |
| O | 29.73  | 10.361 | 9.699  |
| H | 29.491 | 10.671 | 8.826  |
| H | 30.535 | 10.834 | 9.91   |
| O | 26.718 | 26.606 | 22.365 |
| H | 26.922 | 27.468 | 22.002 |
| H | 25.77  | 26.522 | 22.263 |
| O | 20.485 | 24.189 | 26.946 |
| H | 19.824 | 23.499 | 26.989 |
| H | 20.982 | 24.095 | 27.759 |
| O | 14.234 | 29.451 | 25.8   |
| H | 13.729 | 28.82  | 25.288 |
| H | 13.582 | 30.076 | 26.118 |
| O | 21.841 | 25.67  | 24.919 |
| H | 21.461 | 24.958 | 25.433 |
| H | 22.774 | 25.46  | 24.871 |
| O | 23.943 | 26.468 | 22.389 |
| H | 23.24  | 27.114 | 22.464 |
| H | 23.571 | 25.769 | 21.852 |
| O | 12.238 | 24.196 | 24.379 |
| H | 12.264 | 25.01  | 23.876 |
| H | 13.158 | 23.962 | 24.504 |
| O | 14.585 | 30.731 | 16.435 |
| H | 15.025 | 30.964 | 15.618 |
| H | 15.297 | 30.594 | 17.06  |
| O | 13.619 | 27.917 | 18.44  |
| H | 14.291 | 28.521 | 18.757 |
| H | 13.651 | 27.182 | 19.051 |
| O | 18.176 | 26.857 | 16.936 |
| H | 17.888 | 25.989 | 17.218 |
| H | 17.621 | 27.464 | 17.426 |
| O | 13.129 | 20.587 | 24.819 |
| H | 14.035 | 20.781 | 25.059 |
| H | 12.692 | 21.438 | 24.822 |
| O | 21.06  | 28.306 | 25.498 |
| H | 20.998 | 27.406 | 25.18  |
| H | 21.99  | 28.522 | 25.427 |
| O | 8.368  | 24.538 | 22.244 |
| H | 8.26   | 25.485 | 22.33  |
| H | 8.09   | 24.345 | 21.349 |
| O | 14.801 | 26.026 | 20.08  |
| H | 15.168 | 25.155 | 19.923 |
| H | 14.58  | 26.028 | 21.011 |
| O | 11.605 | 29.867 | 17.285 |
| H | 11.941 | 29.176 | 17.856 |

|   |        |        |        |
|---|--------|--------|--------|
| H | 12.281 | 29.973 | 16.615 |
| O | 11.77  | 26.697 | 27.758 |
| H | 12.281 | 27.238 | 28.36  |
| H | 10.88  | 27.045 | 27.821 |
| O | 16.841 | 21.428 | 19.485 |
| H | 17.664 | 21.307 | 19.96  |
| H | 16.432 | 20.562 | 19.491 |
| O | 15.518 | 30.124 | 19.132 |
| H | 15.1   | 30.613 | 19.841 |
| H | 16.381 | 29.894 | 19.476 |
| O | 14.1   | 25.544 | 16.465 |
| H | 14.254 | 26.406 | 16.851 |
| H | 13.352 | 25.195 | 16.95  |
| O | 22.678 | 29.625 | 16.507 |
| H | 23.225 | 30.276 | 16.946 |
| H | 22.985 | 28.785 | 16.848 |
| O | 19.204 | 28.066 | 13.227 |
| H | 19.892 | 28.232 | 12.582 |
| H | 18.729 | 28.895 | 13.289 |
| O | 15.718 | 25.165 | 8.299  |
| H | 16.584 | 24.811 | 8.1    |
| H | 15.678 | 25.178 | 9.255  |
| O | 11.17  | 29.151 | 21.291 |
| H | 12.004 | 29.4   | 21.69  |
| H | 11.226 | 28.201 | 21.193 |
| O | 33.37  | 25.639 | 19.299 |
| H | 32.733 | 25.983 | 19.926 |
| H | 34.157 | 26.164 | 19.446 |
| O | 16.267 | 28.198 | 26.672 |
| H | 16.151 | 27.332 | 26.281 |
| H | 15.448 | 28.656 | 26.485 |
| O | 25.075 | 27.949 | 24.701 |
| H | 25.929 | 27.518 | 24.754 |
| H | 24.626 | 27.503 | 23.984 |
| O | 19.353 | 30.071 | 21.619 |
| H | 18.914 | 29.509 | 22.257 |
| H | 20.133 | 30.387 | 22.075 |
| O | 10.628 | 21.988 | 23.73  |
| H | 11.119 | 22.808 | 23.678 |
| H | 10.072 | 21.992 | 22.95  |
| O | 27.111 | 28.882 | 20.581 |
| H | 26.437 | 28.446 | 20.06  |
| H | 27.194 | 29.751 | 20.189 |
| O | 26.818 | 26.169 | 11.249 |
| H | 27.134 | 26.174 | 12.152 |
| H | 25.937 | 26.54  | 11.3   |
| O | 26.258 | 25.458 | 17.288 |

|   |        |        |        |
|---|--------|--------|--------|
| H | 27.206 | 25.532 | 17.392 |
| H | 26.119 | 25.466 | 16.341 |
| O | 14.62  | 29.462 | 12.835 |
| H | 14.506 | 29.02  | 13.676 |
| H | 15.562 | 29.427 | 12.671 |
| O | 11.198 | 28.961 | 25.719 |
| H | 10.812 | 28.193 | 26.141 |
| H | 10.637 | 29.124 | 24.961 |
| O | 17.29  | 27.644 | 20.529 |
| H | 17.728 | 27.128 | 21.207 |
| H | 16.63  | 27.052 | 20.168 |
| O | 16.955 | 15.331 | 32.7   |
| H | 16.55  | 15.37  | 33.566 |
| H | 16.453 | 15.951 | 32.171 |
| O | 21.44  | 22.08  | 30.761 |
| H | 22.317 | 22.004 | 30.384 |
| H | 21.373 | 21.338 | 31.362 |
| O | 12.756 | 16.479 | 24.912 |
| H | 13.482 | 16.7   | 25.496 |
| H | 12.671 | 17.239 | 24.337 |
| O | 16.042 | 14.118 | 27.054 |
| H | 15.404 | 14.757 | 26.737 |
| H | 16.134 | 14.312 | 27.986 |
| O | 4.385  | 14.355 | 22.132 |
| H | 4.404  | 14.303 | 21.176 |
| H | 5.022  | 15.036 | 22.348 |
| O | 16.029 | 25.333 | 26.761 |
| H | 16.951 | 25.579 | 26.679 |
| H | 15.939 | 25.037 | 27.667 |
| O | 11.873 | 17.622 | 29.258 |
| H | 11.424 | 17.928 | 28.469 |
| H | 12.778 | 17.482 | 28.979 |
| O | 23.729 | 23.294 | 23.224 |
| H | 24.058 | 24.189 | 23.134 |
| H | 24.062 | 22.838 | 22.451 |
| O | 19.392 | 20.508 | 33.059 |
| H | 19.681 | 19.86  | 32.416 |
| H | 20.188 | 20.746 | 33.533 |
| O | 21.786 | 24.636 | 30.15  |
| H | 22.028 | 23.795 | 30.538 |
| H | 22.583 | 24.936 | 29.713 |
| O | 15.76  | 9.473  | 30.393 |
| H | 14.834 | 9.234  | 30.432 |
| H | 15.937 | 9.596  | 29.461 |
| O | 19.217 | 23.957 | 31.127 |
| H | 20.148 | 24.159 | 31.03  |
| H | 19.154 | 23.022 | 30.934 |

|   |        |        |        |
|---|--------|--------|--------|
| O | 19.267 | 10.349 | 29.028 |
| H | 18.369 | 10.678 | 28.982 |
| H | 19.722 | 10.973 | 29.593 |
| O | 16.387 | 20.326 | 30.157 |
| H | 16.358 | 20.609 | 31.071 |
| H | 17.16  | 20.758 | 29.797 |
| O | 21.717 | 19.25  | 31.351 |
| H | 22.221 | 19.013 | 30.573 |
| H | 21.531 | 18.414 | 31.779 |
| O | 21.773 | 16.589 | 28.207 |
| H | 21.965 | 16.894 | 27.32  |
| H | 22.616 | 16.28  | 28.541 |
| O | 30.768 | 14.722 | 29.267 |
| H | 30.961 | 15.589 | 28.908 |
| H | 31.615 | 14.279 | 29.291 |
| O | 7.472  | 18.784 | 29.415 |
| H | 6.896  | 18.049 | 29.205 |
| H | 7.735  | 18.631 | 30.322 |
| O | 13.558 | 25.662 | 30.212 |
| H | 13.476 | 26.59  | 30.432 |
| H | 13.048 | 25.56  | 29.408 |
| O | 19.811 | 22.199 | 24.228 |
| H | 20.647 | 22.43  | 24.631 |
| H | 19.187 | 22.198 | 24.953 |
| O | 22.458 | 17.144 | 25.325 |
| H | 22.54  | 16.622 | 24.528 |
| H | 23.125 | 17.825 | 25.235 |
| O | 12.872 | 12.642 | 31.282 |
| H | 13.08  | 12.215 | 32.114 |
| H | 12.789 | 13.569 | 31.504 |
| O | 28.235 | 15.187 | 27.246 |
| H | 28.641 | 15.958 | 27.641 |
| H | 28.357 | 15.307 | 26.304 |
| O | 21.999 | 28.447 | 22.887 |
| H | 21.135 | 28.619 | 23.261 |
| H | 22.272 | 29.286 | 22.517 |
| O | 11.937 | 14.865 | 28.668 |
| H | 11.386 | 14.863 | 27.885 |
| H | 11.646 | 15.632 | 29.162 |
| O | 20.122 | 14.863 | 32.256 |
| H | 19.815 | 15.711 | 32.578 |
| H | 20.11  | 14.296 | 33.026 |
| O | 12.206 | 23.256 | 31.77  |
| H | 13.122 | 23.494 | 31.626 |
| H | 11.757 | 23.541 | 30.974 |
| O | 10.115 | 20.572 | 28.846 |
| H | 9.487  | 20.234 | 29.485 |

|   |        |        |        |
|---|--------|--------|--------|
| H | 10.295 | 19.828 | 28.271 |
| O | 21.743 | 21.82  | 27.681 |
| H | 22.61  | 21.852 | 27.276 |
| H | 21.234 | 21.243 | 27.112 |
| O | 14.851 | 23.762 | 24.915 |
| H | 15.36  | 24.056 | 24.159 |
| H | 15.232 | 24.231 | 25.657 |
| O | 17.235 | 13.891 | 29.551 |
| H | 16.489 | 13.548 | 30.042 |
| H | 17.465 | 14.704 | 30     |
| O | 12.496 | 18.392 | 23.093 |
| H | 12.583 | 19.222 | 23.562 |
| H | 12.739 | 18.6   | 22.191 |
| O | 13.511 | 21.266 | 28.659 |
| H | 12.659 | 21.659 | 28.471 |
| H | 13.674 | 21.478 | 29.579 |
| O | 19.58  | 12.408 | 31.127 |
| H | 19.432 | 13.285 | 31.481 |
| H | 19.842 | 11.885 | 31.885 |
| O | 9.923  | 17.477 | 27.295 |
| H | 9.111  | 17.051 | 27.568 |
| H | 10.363 | 16.827 | 26.747 |
| O | 18.347 | 8.686  | 25.953 |
| H | 18.62  | 9.597  | 26.065 |
| H | 18.068 | 8.41   | 26.826 |
| O | 15.273 | 18.259 | 34.139 |
| H | 14.368 | 18.555 | 34.047 |
| H | 15.707 | 18.562 | 33.342 |
| O | 24.758 | 23.037 | 28.812 |
| H | 24.497 | 23.059 | 27.891 |
| H | 25.629 | 22.639 | 28.804 |
| O | 31.006 | 24.973 | 26.133 |
| H | 31.048 | 25.098 | 27.081 |
| H | 31.194 | 24.044 | 26.005 |
| O | 21.843 | 14.029 | 29.919 |
| H | 21.364 | 13.201 | 29.9   |
| H | 21.47  | 14.505 | 30.661 |
| O | 3.691  | 13.415 | 24.653 |
| H | 3.879  | 13.535 | 23.722 |
| H | 4.249  | 12.684 | 24.918 |
| O | 10.883 | 14.903 | 26.04  |
| H | 10.417 | 14.692 | 25.231 |
| H | 11.719 | 15.265 | 25.746 |
| O | 27.401 | 26.591 | 25.41  |
| H | 27.41  | 26.62  | 26.367 |
| H | 28.087 | 27.203 | 25.145 |
| O | 21.655 | 11.816 | 28.049 |



|   |        |        |        |
|---|--------|--------|--------|
| H | 22.116 | 11.342 | 28.742 |
| H | 22.219 | 11.724 | 27.281 |
| O | 13.533 | 12.733 | 28.119 |
| H | 14.455 | 12.946 | 27.977 |
| H | 13.182 | 13.489 | 28.589 |
| O | 23.935 | 13.857 | 27.143 |
| H | 23.268 | 14.002 | 27.814 |
| H | 24.462 | 14.655 | 27.153 |
| O | 18.692 | 26.056 | 26.329 |
| H | 19.128 | 26.796 | 26.752 |
| H | 19.378 | 25.394 | 26.239 |
| O | 11.851 | 12.855 | 23.124 |
| H | 11.658 | 13.712 | 22.744 |
| H | 12.698 | 12.969 | 23.555 |
| O | 15.626 | 12.123 | 30.89  |
| H | 15.657 | 11.216 | 30.585 |
| H | 14.766 | 12.438 | 30.611 |
| O | 10.014 | 20.59  | 26.179 |
| H | 9.549  | 21.152 | 26.799 |
| H | 10.185 | 21.155 | 25.426 |
| O | 19.394 | 15.833 | 16.886 |
| H | 20.083 | 16.332 | 17.326 |
| H | 18.978 | 15.332 | 17.587 |
| O | 20.054 | 26.94  | 20.282 |
| H | 19.373 | 27.3   | 19.714 |
| H | 19.839 | 26.01  | 20.354 |
| O | 16.945 | 12.623 | 24.602 |
| H | 16.984 | 12.276 | 23.71  |
| H | 17.651 | 12.172 | 25.065 |
| O | 22.958 | 16.088 | 5.736  |
| H | 22.339 | 16.502 | 6.337  |
| H | 23.819 | 16.312 | 6.088  |
| O | 23.37  | 10.671 | 13.931 |
| H | 22.71  | 9.994  | 14.082 |
| H | 22.878 | 11.41  | 13.574 |
| O | 15.044 | 14.239 | 14.849 |
| H | 14.889 | 15.184 | 14.839 |
| H | 15.803 | 14.127 | 15.421 |
| O | 17.468 | 17.185 | 14.984 |
| H | 17.92  | 16.542 | 15.53  |
| H | 16.609 | 17.286 | 15.394 |
| O | 14.403 | 16.848 | 15.969 |
| H | 13.948 | 17.67  | 16.154 |
| H | 14.21  | 16.292 | 16.723 |
| O | 15.941 | 22.78  | 28.839 |
| H | 15.971 | 22.046 | 29.452 |
| H | 16.454 | 23.468 | 29.264 |

|   |        |        |        |
|---|--------|--------|--------|
| O | 9.19   | 26.368 | 11.58  |
| H | 9.137  | 26.834 | 10.746 |
| H | 8.366  | 26.573 | 12.023 |
| O | 25.461 | 27.257 | 19.145 |
| H | 24.532 | 27.278 | 19.375 |
| H | 25.525 | 26.581 | 18.47  |
| O | 25.425 | 11.559 | 27.11  |
| H | 24.902 | 12.36  | 27.139 |
| H | 25.715 | 11.43  | 28.013 |
| O | 18.419 | 5.694  | 17.961 |
| H | 17.904 | 5.222  | 17.306 |
| H | 19.284 | 5.287  | 17.924 |
| O | 25.06  | 21.993 | 21.145 |
| H | 25.996 | 22.109 | 20.98  |
| H | 24.83  | 21.197 | 20.666 |
| O | 29.628 | 17.598 | 10.714 |
| H | 29.801 | 18.391 | 11.222 |
| H | 30.054 | 16.899 | 11.21  |
| O | 17.57  | 13.249 | 16.234 |
| H | 18.437 | 13.654 | 16.246 |
| H | 17.195 | 13.459 | 17.089 |
| O | 15.28  | 15.817 | 12.454 |
| H | 14.861 | 15.48  | 11.662 |
| H | 15.297 | 15.07  | 13.052 |
| O | 21.627 | 12.663 | 13.231 |
| H | 21.25  | 12.924 | 14.071 |
| H | 21.47  | 13.412 | 12.655 |
| O | 17.755 | 15.73  | 25.649 |
| H | 18.607 | 15.4   | 25.932 |
| H | 17.126 | 15.092 | 25.988 |
| O | 18.731 | 22.555 | 17.426 |
| H | 17.984 | 22.738 | 16.856 |
| H | 18.404 | 22.718 | 18.31  |
| O | 16.305 | 13.653 | 9.176  |
| H | 15.683 | 13.996 | 9.818  |
| H | 15.787 | 13.539 | 8.379  |
| O | 14.368 | 13.467 | 21.096 |
| H | 14.669 | 14.215 | 21.613 |
| H | 14.139 | 13.841 | 20.245 |
| O | 22.909 | 23.677 | 16.692 |
| H | 22.302 | 24.379 | 16.929 |
| H | 22.394 | 22.875 | 16.78  |
| O | 22.343 | 26.264 | 13.759 |
| H | 21.624 | 26.451 | 13.154 |
| H | 22.138 | 26.778 | 14.54  |
| O | 28.285 | 4.477  | 19.359 |
| H | 29.064 | 4.957  | 19.64  |

|   |        |        |        |
|---|--------|--------|--------|
| H | 28.469 | 3.566  | 19.587 |
| O | 8.898  | 18.427 | 15.597 |
| H | 9.56   | 19.004 | 15.215 |
| H | 8.079  | 18.693 | 15.179 |
| O | 11.489 | 21.897 | 12.634 |
| H | 12.403 | 21.614 | 12.659 |
| H | 11.531 | 22.85  | 12.711 |
| O | 21.335 | 19.709 | 23.292 |
| H | 20.775 | 20.422 | 23.599 |
| H | 20.725 | 19.007 | 23.064 |
| O | 19.946 | 29.885 | 16.909 |
| H | 20.864 | 29.831 | 16.642 |
| H | 19.97  | 30.307 | 17.768 |
| O | 13.262 | 26.321 | 13.77  |
| H | 13.79  | 27.004 | 14.183 |
| H | 13.563 | 25.508 | 14.176 |
| O | 25.524 | 21.135 | 12.809 |
| H | 25.102 | 20.588 | 12.146 |
| H | 25.298 | 22.031 | 12.559 |
| O | 27.382 | 25.171 | 14.397 |
| H | 27.956 | 24.443 | 14.635 |
| H | 26.543 | 24.758 | 14.194 |
| O | 19.293 | 13.239 | 27.628 |
| H | 18.729 | 13.63  | 28.295 |
| H | 20.128 | 13.096 | 28.074 |
| O | 11.386 | 16.902 | 19.667 |
| H | 10.675 | 17.357 | 19.216 |
| H | 11.773 | 17.567 | 20.236 |
| O | 14.224 | 10.457 | 25.473 |
| H | 13.675 | 10.076 | 24.788 |
| H | 13.607 | 10.898 | 26.057 |
| O | 27.741 | 16.05  | 24.581 |
| H | 26.823 | 16.164 | 24.335 |
| H | 28.205 | 16.731 | 24.094 |
| O | 15.712 | 18.646 | 24.882 |
| H | 16.604 | 18.442 | 24.598 |
| H | 15.821 | 19.333 | 25.539 |
| O | 18.883 | 6.511  | 14.197 |
| H | 19.033 | 5.952  | 14.959 |
| H | 19.752 | 6.635  | 13.816 |
| O | 24.681 | 20.073 | 14.961 |
| H | 23.846 | 20.534 | 15.05  |
| H | 25.116 | 20.506 | 14.227 |
| O | 18.261 | 22.005 | 26.323 |
| H | 17.341 | 22.148 | 26.101 |
| H | 18.241 | 21.652 | 27.212 |
| O | 15.03  | 16.584 | 26.547 |

|   |        |        |        |
|---|--------|--------|--------|
| H | 15.496 | 17.223 | 26.006 |
| H | 14.873 | 17.039 | 27.374 |
| O | 19.257 | 18.968 | 27.196 |
| H | 19.113 | 18.833 | 26.259 |
| H | 19.164 | 18.097 | 27.581 |
| O | 13.242 | 15.061 | 18.782 |
| H | 12.414 | 14.723 | 18.441 |
| H | 13.003 | 15.872 | 19.231 |
| O | 18.487 | 11.278 | 13.645 |
| H | 18.181 | 11.915 | 13     |
| H | 18.748 | 11.807 | 14.399 |
| O | 16.854 | 8.504  | 19.286 |
| H | 17.512 | 8.476  | 19.98  |
| H | 16.016 | 8.472  | 19.748 |
| O | 14.272 | 18.25  | 13.393 |
| H | 14.767 | 17.467 | 13.154 |
| H | 13.532 | 18.261 | 12.786 |
| O | 21.4   | 11.534 | 24.354 |
| H | 22.108 | 10.945 | 24.616 |
| H | 21.833 | 12.373 | 24.195 |
| O | 14.464 | 18.51  | 28.583 |
| H | 13.694 | 19.017 | 28.328 |
| H | 14.964 | 19.1   | 29.147 |
| O | 13.277 | 19.405 | 15.875 |
| H | 13.618 | 19.224 | 14.999 |
| H | 13.859 | 20.078 | 16.225 |
| O | 15.771 | 14.127 | 18.118 |
| H | 16.154 | 14.342 | 18.969 |
| H | 14.88  | 14.475 | 18.163 |
| O | 14.25  | 22.462 | 13.34  |
| H | 14.147 | 22.425 | 12.389 |
| H | 15.019 | 23.016 | 13.476 |
| O | 16.827 | 11.302 | 10.527 |
| H | 17.434 | 11.501 | 11.239 |
| H | 16.743 | 12.126 | 10.047 |
| O | 14.742 | 28.238 | 15.334 |
| H | 14.438 | 28.843 | 16.011 |
| H | 15.695 | 28.235 | 15.425 |
| O | 22.076 | 9.108  | 15.841 |
| H | 22.533 | 9.041  | 16.68  |
| H | 21.422 | 9.793  | 15.978 |
| O | 24.223 | 17.423 | 14.731 |
| H | 23.553 | 17.297 | 15.402 |
| H | 24.473 | 18.344 | 14.812 |
| O | 6.718  | 15.743 | 20.562 |
| H | 6.749  | 16.374 | 21.281 |
| H | 7.498  | 15.202 | 20.685 |

|   |        |        |        |
|---|--------|--------|--------|
| O | 10.755 | 23.099 | 29.429 |
| H | 10.654 | 22.161 | 29.268 |
| H | 10.382 | 23.516 | 28.652 |
| O | 27.991 | 19.053 | 24.709 |
| H | 27.83  | 19.759 | 24.083 |
| H | 27.119 | 18.729 | 24.934 |
| O | 26.205 | 13.685 | 6.223  |
| H | 26.475 | 12.817 | 6.523  |
| H | 25.384 | 13.533 | 5.756  |
| O | 25.571 | 16.088 | 26.879 |
| H | 25.369 | 16.91  | 26.432 |
| H | 26.523 | 16.094 | 26.975 |
| O | 24.569 | 19.77  | 10.825 |
| H | 23.627 | 19.909 | 10.921 |
| H | 24.689 | 18.832 | 10.973 |
| O | 21.065 | 25.826 | 17.148 |
| H | 21.323 | 26.57  | 17.693 |
| H | 20.241 | 26.1   | 16.744 |
| O | 7.429  | 14.828 | 14.904 |
| H | 7.2    | 14.177 | 14.241 |
| H | 8.385  | 14.873 | 14.875 |
| O | 19.662 | 19.241 | 14.753 |
| H | 19.241 | 19.991 | 14.332 |
| H | 18.958 | 18.601 | 14.862 |
| O | 25.015 | 25.077 | 25.389 |
| H | 24.909 | 25.396 | 26.285 |
| H | 25.954 | 25.154 | 25.217 |
| O | 15.648 | 10.447 | 15.077 |
| H | 15.635 | 9.705  | 15.681 |
| H | 16.538 | 10.456 | 14.726 |
| O | 24.255 | 22.071 | 26.165 |
| H | 25.154 | 22.104 | 25.836 |
| H | 23.727 | 22.436 | 25.455 |
| O | 19.663 | 25.389 | 12.536 |
| H | 19.505 | 26.136 | 13.115 |
| H | 19.449 | 25.714 | 11.662 |
| O | 22.74  | 15.438 | 22.947 |
| H | 23.517 | 15.344 | 22.397 |
| H | 22.671 | 14.602 | 23.409 |
| O | 14.287 | 21.072 | 10.769 |
| H | 15.146 | 20.653 | 10.73  |
| H | 14.247 | 21.611 | 9.979  |
| O | 9.796  | 9.679  | 25.912 |
| H | 9.944  | 10.403 | 26.52  |
| H | 8.844  | 9.632  | 25.823 |
| O | 22.303 | 16.254 | 11.052 |
| H | 23.249 | 16.2   | 11.189 |

|   |        |        |        |
|---|--------|--------|--------|
| H | 21.924 | 15.914 | 11.862 |
| O | 16.339 | 23.922 | 16.134 |
| H | 16.628 | 24.337 | 15.322 |
| H | 15.499 | 24.337 | 16.33  |
| O | 21.65  | 19.95  | 11.103 |
| H | 21.479 | 19.292 | 11.777 |
| H | 21.353 | 20.773 | 11.491 |
| O | 16.783 | 20.269 | 14.756 |
| H | 16.29  | 20.474 | 15.55  |
| H | 16.349 | 19.496 | 14.397 |
| O | 20.451 | 13.255 | 15.701 |
| H | 20.65  | 13.928 | 16.352 |
| H | 20.389 | 12.444 | 16.206 |
| O | 24.977 | 13.027 | 11.868 |
| H | 25.252 | 12.3   | 12.426 |
| H | 24.624 | 13.676 | 12.477 |
| O | 18.644 | 13.758 | 12.463 |
| H | 18.538 | 14.559 | 12.976 |
| H | 18.746 | 14.063 | 11.561 |
| O | 16.501 | 15.419 | 20.562 |
| H | 16.026 | 15.502 | 21.388 |
| H | 16.832 | 16.3   | 20.386 |
| O | 27.658 | 10.103 | 21.625 |
| H | 28.235 | 10.275 | 20.881 |
| H | 27.592 | 10.945 | 22.077 |
| O | 25.356 | 22.448 | 17.363 |
| H | 25.957 | 23.193 | 17.351 |
| H | 24.51  | 22.82  | 17.113 |
| O | 24.968 | 14.88  | 21.457 |
| H | 25.063 | 13.947 | 21.268 |
| H | 24.656 | 15.261 | 20.636 |
| O | 16.794 | 19.565 | 10.797 |
| H | 16.91  | 18.774 | 11.323 |
| H | 17.268 | 20.244 | 11.278 |
| O | 9.428  | 18.475 | 18.235 |
| H | 8.496  | 18.538 | 18.445 |
| H | 9.453  | 18.386 | 17.282 |
| O | 30.636 | 22.114 | 13.548 |
| H | 31.534 | 22.436 | 13.618 |
| H | 30.729 | 21.169 | 13.423 |
| O | 21.547 | 23.357 | 21.133 |
| H | 22.255 | 23.657 | 20.563 |
| H | 21.957 | 23.253 | 21.991 |
| O | 12.513 | 25.53  | 9.66   |
| H | 12.422 | 24.893 | 8.952  |
| H | 11.833 | 26.181 | 9.486  |
| O | 15.709 | 27.732 | 22.834 |

|   |        |        |        |
|---|--------|--------|--------|
| H | 16.206 | 28.194 | 22.158 |
| H | 16.316 | 27.07  | 23.166 |
| O | 17.379 | 29.438 | 15.92  |
| H | 18.303 | 29.489 | 16.168 |
| H | 17.258 | 30.157 | 15.3   |
| O | 16.011 | 17.212 | 31.043 |
| H | 15.317 | 17.042 | 30.406 |
| H | 16.788 | 17.379 | 30.51  |
| O | 24.396 | 23.347 | 12.071 |
| H | 24.119 | 24.109 | 11.562 |
| H | 23.629 | 23.12  | 12.597 |
| O | 9.908  | 17.41  | 23.452 |
| H | 10.793 | 17.759 | 23.344 |
| H | 9.347  | 18.185 | 23.484 |
| O | 14.078 | 22.542 | 8.549  |
| H | 14.538 | 23.355 | 8.338  |
| H | 13.169 | 22.71  | 8.303  |
| O | 15.072 | 21.246 | 16.941 |
| H | 15.033 | 21.149 | 17.893 |
| H | 15.506 | 22.088 | 16.804 |
| O | 17.755 | 17.448 | 12.332 |
| H | 18.247 | 17.413 | 13.152 |
| H | 16.93  | 17.005 | 12.528 |
| O | 16.921 | 23.022 | 22.968 |
| H | 16.499 | 23.164 | 22.121 |
| H | 17.771 | 22.638 | 22.751 |
| O | 8.472  | 19.84  | 23.852 |
| H | 8.277  | 20.697 | 23.474 |
| H | 8.95   | 20.037 | 24.658 |
| O | 17.786 | 21.334 | 12.658 |
| H | 17.278 | 22.145 | 12.626 |
| H | 17.52  | 20.917 | 13.477 |
| O | 11.65  | 21.466 | 19.131 |
| H | 12.012 | 20.691 | 18.703 |
| H | 11.042 | 21.833 | 18.489 |
| O | 19.878 | 12.178 | 8.33   |
| H | 20.645 | 12.75  | 8.341  |
| H | 19.732 | 11.955 | 9.249  |
| O | 25.465 | 16.898 | 23.713 |
| H | 25.257 | 16.216 | 23.076 |
| H | 24.796 | 17.568 | 23.574 |
| O | 25.204 | 18.77  | 26.226 |
| H | 24.96  | 19.407 | 25.555 |
| H | 24.691 | 19.022 | 26.994 |
| O | 11.774 | 9.792  | 11.863 |
| H | 12.611 | 10.227 | 12.022 |
| H | 11.921 | 9.271  | 11.074 |

|   |        |        |        |
|---|--------|--------|--------|
| O | 17.469 | 25.759 | 23.544 |
| H | 17.553 | 24.829 | 23.332 |
| H | 18.056 | 25.889 | 24.288 |
| O | 14.927 | 15.308 | 22.925 |
| H | 14.754 | 14.585 | 23.528 |
| H | 14.552 | 16.075 | 23.358 |
| O | 27.736 | 17.219 | 19.315 |
| H | 27.382 | 17.243 | 18.426 |
| H | 27.865 | 16.288 | 19.496 |
| O | 14.371 | 13.497 | 24.665 |
| H | 13.969 | 12.678 | 24.955 |
| H | 15.312 | 13.331 | 24.71  |
| O | 19.094 | 11.327 | 25.729 |
| H | 19.08  | 11.87  | 26.518 |
| H | 19.942 | 11.511 | 25.326 |
| O | 20.33  | 2.519  | 14.449 |
| H | 20.702 | 2.649  | 13.576 |
| H | 21.004 | 2.843  | 15.046 |
| O | 18.687 | 29.294 | 24.049 |
| H | 19.196 | 29.293 | 24.859 |
| H | 17.776 | 29.344 | 24.338 |
| O | 20.257 | 22.752 | 12.421 |
| H | 19.441 | 22.302 | 12.202 |
| H | 19.999 | 23.665 | 12.552 |
| O | 16.52  | 23.984 | 12.622 |
| H | 16.125 | 24.529 | 11.941 |
| H | 17.05  | 24.593 | 13.138 |
| O | 9.36   | 26.219 | 24.548 |
| H | 9.741  | 25.846 | 25.343 |
| H | 8.518  | 25.773 | 24.454 |
| O | 21.31  | 21.552 | 17.118 |
| H | 20.371 | 21.738 | 17.095 |
| H | 21.367 | 20.637 | 17.392 |
| O | 26.912 | 22.294 | 24.819 |
| H | 27.582 | 22.928 | 25.074 |
| H | 27.283 | 21.845 | 24.059 |
| O | 26.128 | 20.794 | 8.596  |
| H | 25.623 | 21.575 | 8.823  |
| H | 25.934 | 20.171 | 9.297  |
| O | 28.098 | 12.063 | 12.714 |
| H | 28.49  | 12.491 | 11.953 |
| H | 27.572 | 11.353 | 12.345 |
| O | 20.386 | 16.855 | 22.874 |
| H | 19.688 | 16.2   | 22.901 |
| H | 21.169 | 16.361 | 22.63  |
| O | 20.219 | 17.398 | 9.613  |
| H | 21.062 | 17.358 | 10.063 |



|   |        |        |        |
|---|--------|--------|--------|
| H | 19.753 | 16.615 | 9.906  |
| O | 16.815 | 12.151 | 21.77  |
| H | 15.968 | 12.574 | 21.625 |
| H | 17.118 | 11.915 | 20.894 |
| O | 23.346 | 13.405 | 24.485 |
| H | 23.579 | 13.548 | 25.403 |
| H | 24.171 | 13.162 | 24.065 |
| O | 14.298 | 10.813 | 12.508 |
| H | 14.985 | 10.8   | 11.841 |
| H | 14.71  | 10.432 | 13.283 |
| O | 9.276  | 9.6    | 12.286 |
| H | 9.228  | 10.347 | 12.883 |
| H | 10.196 | 9.561  | 12.025 |
| O | 27.973 | 19.014 | 7.91   |
| H | 27.322 | 19.715 | 7.966  |
| H | 27.618 | 18.314 | 8.458  |
| O | 8.414  | 13.815 | 22.047 |
| H | 8.693  | 12.915 | 21.88  |
| H | 9.23   | 14.309 | 22.122 |
| O | 27.268 | 12.771 | 15.442 |
| H | 26.34  | 12.54  | 15.396 |
| H | 27.646 | 12.406 | 14.643 |
| O | 20.594 | 10.31  | 22.154 |
| H | 21.357 | 9.739  | 22.06  |
| H | 20.755 | 10.793 | 22.965 |
| O | 29.545 | 13.664 | 8.748  |
| H | 28.742 | 13.678 | 9.268  |
| H | 30.139 | 13.095 | 9.239  |
| O | 23.224 | 6.175  | 17.644 |
| H | 23.777 | 6.187  | 16.863 |
| H | 22.995 | 7.093  | 17.788 |
| O | 19.409 | 24.33  | 19.467 |
| H | 20.177 | 23.984 | 19.922 |
| H | 19.523 | 24.05  | 18.559 |
| O | 7.605  | 10.179 | 21.005 |
| H | 8.263  | 10.849 | 21.186 |
| H | 7.961  | 9.687  | 20.265 |
| O | 15.15  | 23.322 | 20.352 |
| H | 15.685 | 22.545 | 20.191 |
| H | 14.359 | 22.986 | 20.773 |
| O | 22.52  | 22.091 | 13.856 |
| H | 21.633 | 22.215 | 13.52  |
| H | 22.443 | 22.242 | 14.798 |
| O | 18.279 | 15.065 | 22.961 |
| H | 17.794 | 15.164 | 23.781 |
| H | 17.829 | 14.357 | 22.501 |
| O | 15.927 | 8.033  | 16.597 |

|   |        |        |        |
|---|--------|--------|--------|
| H | 15.802 | 7.089  | 16.502 |
| H | 16.391 | 8.13   | 17.429 |
| O | 28.018 | 22.874 | 19.665 |
| H | 27.946 | 21.926 | 19.553 |
| H | 28.904 | 23.008 | 20.002 |
| O | 17.628 | 25.957 | 14.337 |
| H | 17.759 | 26.13  | 15.27  |
| H | 18.137 | 26.635 | 13.894 |
| O | 18.063 | 3.425  | 16.417 |
| H | 18.713 | 3.289  | 15.728 |
| H | 17.221 | 3.282  | 15.984 |
| O | 18.629 | 18.047 | 24.495 |
| H | 19.425 | 17.798 | 24.027 |
| H | 18.252 | 17.217 | 24.786 |
| O | 23.616 | 28.7   | 12.625 |
| H | 23.669 | 27.819 | 12.996 |
| H | 24.246 | 29.212 | 13.133 |
| O | 19.091 | 21.702 | 21.61  |
| H | 19.893 | 21.913 | 21.132 |
| H | 19.386 | 21.511 | 22.501 |
| O | 23.917 | 24.227 | 20.046 |
| H | 24.379 | 23.451 | 20.363 |
| H | 24.368 | 24.46  | 19.235 |
| O | 21.055 | 15.483 | 13.922 |
| H | 20.52  | 14.923 | 14.484 |
| H | 21.497 | 16.077 | 14.529 |
| O | 24.222 | 10.565 | 18.262 |
| H | 24.868 | 9.939  | 18.589 |
| H | 24.551 | 10.82  | 17.4   |
| O | 25.046 | 11.998 | 21.977 |
| H | 25.844 | 12.043 | 22.503 |
| H | 24.907 | 11.062 | 21.832 |
| O | 10.185 | 19.902 | 11.363 |
| H | 10.681 | 20.668 | 11.651 |
| H | 9.446  | 19.854 | 11.969 |
| O | 16.788 | 7.395  | 9.922  |
| H | 17.393 | 8.119  | 9.764  |
| H | 16.281 | 7.668  | 10.686 |
| O | 20.387 | 10.75  | 11.029 |
| H | 20.686 | 11.237 | 11.797 |
| H | 21.093 | 10.129 | 10.849 |
| O | 18.426 | 9.698  | 9.126  |
| H | 19.206 | 9.307  | 9.522  |
| H | 18.13  | 10.342 | 9.769  |
| O | 18.182 | 24.209 | 8.114  |
| H | 18.945 | 24.632 | 8.509  |
| H | 18.506 | 23.359 | 7.818  |

|   |        |        |        |
|---|--------|--------|--------|
| O | 21.753 | 14.324 | 8.707  |
| H | 21.991 | 14.935 | 9.404  |
| H | 22.481 | 14.373 | 8.087  |
| O | 22.599 | 19.857 | 8.309  |
| H | 22.736 | 20.754 | 8.005  |
| H | 22.329 | 19.952 | 9.222  |
| O | 14.199 | 6.789  | 25.103 |
| H | 14.274 | 7.493  | 24.458 |
| H | 15.096 | 6.639  | 25.399 |
| O | 9.459  | 16.99  | 9.082  |
| H | 8.605  | 16.558 | 9.061  |
| H | 9.255  | 17.925 | 9.078  |
| O | 19.101 | 14.65  | 9.853  |
| H | 18.31  | 14.349 | 9.407  |
| H | 19.813 | 14.432 | 9.253  |
| O | 19.734 | 25.768 | 9.831  |
| H | 20.332 | 25.069 | 9.568  |
| H | 20.129 | 26.567 | 9.481  |
| O | 15.175 | 18.744 | 8.697  |
| H | 15.753 | 18.867 | 9.45   |
| H | 15.604 | 18.066 | 8.174  |
| O | 20.98  | 18.384 | 6.461  |
| H | 20.751 | 19.234 | 6.083  |
| H | 21.596 | 18.593 | 7.162  |
| O | 24.633 | 24.894 | 15.023 |
| H | 24.047 | 24.343 | 15.542 |
| H | 24.047 | 25.426 | 14.484 |
| O | 27.14  | 14.032 | 10.141 |
| H | 26.858 | 14.497 | 10.93  |
| H | 26.466 | 13.368 | 10.001 |
| O | 26.89  | 17.52  | 9.823  |
| H | 26.255 | 17.894 | 10.434 |
| H | 27.67  | 17.362 | 10.355 |
| O | 19.228 | 16.616 | 7.143  |
| H | 20.039 | 16.978 | 6.788  |
| H | 19.092 | 17.09  | 7.963  |
| O | 27.373 | 16.141 | 6.634  |
| H | 27.004 | 15.284 | 6.848  |
| H | 27.278 | 16.65  | 7.439  |
| O | 12.036 | 12.55  | 8.6    |
| H | 12.391 | 11.692 | 8.369  |
| H | 12.764 | 13.156 | 8.461  |
| O | 8.073  | 19.293 | 12.916 |
| H | 7.339  | 19.82  | 13.231 |
| H | 7.831  | 18.392 | 13.131 |
| O | 28.786 | 10.546 | 7.084  |
| H | 29.066 | 11.286 | 6.545  |

|   |        |        |        |
|---|--------|--------|--------|
| H | 27.829 | 10.58  | 7.058  |
| O | 17.516 | 20.477 | 6.169  |
| H | 16.589 | 20.714 | 6.18   |
| H | 17.614 | 19.86  | 6.895  |
| O | 18.504 | 19.38  | 8.678  |
| H | 17.977 | 19.426 | 9.475  |
| H | 19.214 | 18.775 | 8.895  |
| O | 24.323 | 25.463 | 9.965  |
| H | 24.664 | 25.721 | 9.109  |
| H | 23.615 | 26.083 | 10.138 |
| O | 8.864  | 19.929 | 8.576  |
| H | 8.631  | 19.973 | 9.504  |
| H | 9.638  | 20.488 | 8.497  |
| O | 24.171 | 22.829 | 8.747  |
| H | 23.279 | 23.17  | 8.821  |
| H | 24.714 | 23.479 | 9.192  |
| O | 21.244 | 23.78  | 8.287  |
| H | 21.294 | 24.432 | 7.588  |
| H | 20.811 | 23.028 | 7.883  |
| O | 19.924 | 21.603 | 7.612  |
| H | 20.045 | 21.457 | 6.674  |
| H | 19.489 | 20.809 | 7.924  |
| O | 14.314 | 14.558 | 7.198  |
| H | 15.157 | 14.999 | 7.097  |
| H | 13.665 | 15.252 | 7.083  |
| O | 17.02  | 28.357 | 11.062 |
| H | 17.879 | 28.356 | 11.485 |
| H | 17.155 | 28.842 | 10.248 |
| O | 24.135 | 9.013  | 7.504  |
| H | 24.017 | 8.16   | 7.084  |
| H | 24.243 | 8.81   | 8.433  |
| O | 20.533 | 7.791  | 9.143  |
| H | 21.058 | 7.108  | 8.727  |
| H | 20.768 | 7.744  | 10.07  |
| O | 14.962 | 26.232 | 10.749 |
| H | 15.29  | 27.119 | 10.896 |
| H | 14.02  | 26.344 | 10.621 |
| O | 12.377 | 19.602 | 8.232  |
| H | 13.164 | 19.429 | 8.749  |
| H | 12.059 | 20.445 | 8.555  |
| O | 23.166 | 10.212 | 29.633 |
| H | 23.016 | 10.028 | 30.561 |
| H | 23.982 | 9.755  | 29.427 |
| O | 21.656 | 8.536  | 27.858 |
| H | 20.705 | 8.617  | 27.786 |
| H | 21.897 | 9.152  | 28.549 |
| O | 20.104 | 6.795  | 25.015 |

|   |        |        |        |
|---|--------|--------|--------|
| H | 20.145 | 6.764  | 24.059 |
| H | 19.476 | 7.492  | 25.204 |
| O | 21.823 | 4.798  | 23.765 |
| H | 22.025 | 4.211  | 23.036 |
| H | 21.345 | 5.523  | 23.363 |
| O | 22.582 | 8.671  | 21.629 |
| H | 22.293 | 7.763  | 21.724 |
| H | 23.441 | 8.695  | 22.051 |
| O | 19.672 | 12.13  | 20.083 |
| H | 18.909 | 11.736 | 19.661 |
| H | 19.929 | 11.496 | 20.753 |
| O | 25.745 | 8.456  | 19.464 |
| H | 26.1   | 7.602  | 19.219 |
| H | 25.767 | 8.46   | 20.421 |
| O | 14.942 | 7.964  | 12.04  |
| H | 14.351 | 7.747  | 12.761 |
| H | 15.77  | 8.182  | 12.468 |
| O | 25.469 | 4.58   | 12.551 |
| H | 24.865 | 4.327  | 13.25  |
| H | 26.339 | 4.488  | 12.942 |
| O | 12.903 | 8.209  | 16.179 |
| H | 13.744 | 7.755  | 16.229 |
| H | 12.679 | 8.196  | 15.249 |
| O | 20.681 | 4.849  | 17.283 |
| H | 21.085 | 3.984  | 17.214 |
| H | 21.419 | 5.454  | 17.358 |
| O | 14.96  | 5.607  | 16.675 |
| H | 15.424 | 5.202  | 17.408 |
| H | 14.977 | 4.944  | 15.985 |
| O | 24.929 | 3.111  | 21.795 |
| H | 24.917 | 2.992  | 22.745 |
| H | 25.167 | 4.03   | 21.672 |
| O | 24.821 | 6.199  | 15.508 |
| H | 25.311 | 5.466  | 15.136 |
| H | 25.487 | 6.86   | 15.697 |
| O | 20.735 | 10.817 | 17.859 |
| H | 21.253 | 10.076 | 18.174 |
| H | 20.533 | 11.319 | 18.649 |
| O | 15.859 | 5.475  | 21.218 |
| H | 15.249 | 5.051  | 20.614 |
| H | 15.499 | 6.353  | 21.344 |
| O | 20.771 | 5.262  | 12.215 |
| H | 21.477 | 5.904  | 12.298 |
| H | 21.215 | 4.414  | 12.234 |
| O | 16.933 | 4.598  | 13.488 |
| H | 17.476 | 5.37   | 13.65  |
| H | 16.31  | 4.881  | 12.818 |

|   |        |        |        |
|---|--------|--------|--------|
| O | 18.595 | 4.874  | 20.615 |
| H | 17.733 | 4.934  | 21.028 |
| H | 18.43  | 5.061  | 19.69  |
| O | 22.777 | 7.188  | 13.749 |
| H | 23.243 | 6.495  | 14.218 |
| H | 22.565 | 7.833  | 14.424 |
| O | 22.325 | 8.632  | 18.507 |
| H | 23.08  | 9.21   | 18.608 |
| H | 21.889 | 8.655  | 19.359 |
| O | 15.022 | 8.21   | 21.62  |
| H | 15.405 | 8.711  | 22.34  |
| H | 14.179 | 8.633  | 21.456 |
| O | 23.142 | 5.674  | 20.23  |
| H | 23.876 | 6.209  | 20.531 |
| H | 23.16  | 5.756  | 19.277 |
| O | 17.461 | 8.619  | 13.175 |
| H | 17.91  | 8.001  | 13.751 |
| H | 17.992 | 9.414  | 13.216 |
| O | 31.544 | 8.965  | 24.418 |
| H | 31.384 | 9.851  | 24.091 |
| H | 32.103 | 8.562  | 23.753 |
| O | 16.549 | 9.056  | 23.942 |
| H | 17.251 | 8.693  | 24.482 |
| H | 16.269 | 9.842  | 24.409 |
| O | 16.938 | 5.183  | 23.867 |
| H | 16.594 | 5.433  | 23.009 |
| H | 16.63  | 4.286  | 23.996 |
| O | 19.849 | 6.507  | 22.403 |
| H | 19.182 | 7.037  | 21.965 |
| H | 19.777 | 5.645  | 21.994 |
| O | 13.207 | 10.901 | 16.462 |
| H | 13.966 | 10.894 | 15.878 |
| H | 12.945 | 9.983  | 16.526 |
| O | 23.406 | 10.236 | 25.781 |
| H | 23.432 | 9.436  | 26.307 |
| H | 24.233 | 10.677 | 25.974 |
| O | 26.761 | 5.183  | 10.151 |
| H | 26.488 | 5.243  | 11.066 |
| H | 26.044 | 5.582  | 9.659  |
| O | 22.438 | 2.8    | 16.266 |
| H | 22.092 | 1.912  | 16.356 |
| H | 23.145 | 2.849  | 16.909 |
| O | 24.848 | 9.495  | 10.383 |
| H | 24.994 | 10.398 | 10.1   |
| H | 25.694 | 9.213  | 10.73  |
| O | 18.294 | 8.698  | 21.634 |
| H | 19.002 | 9.278  | 21.914 |

|   |        |        |        |
|---|--------|--------|--------|
| H | 17.596 | 8.848  | 22.271 |
| O | 30.401 | 5.99   | 20.707 |
| H | 31.337 | 6.172  | 20.791 |
| H | 30.087 | 5.927  | 21.609 |
| O | 27.262 | 11.494 | 24.43  |
| H | 26.724 | 11.713 | 25.191 |
| H | 27.418 | 10.553 | 24.51  |
| O | 16.553 | 11.125 | 27.716 |
| H | 16.055 | 10.917 | 26.925 |
| H | 16.725 | 12.064 | 27.651 |
| O | 18.636 | 14.472 | 19.061 |
| H | 19.069 | 13.674 | 19.365 |
| H | 18.005 | 14.68  | 19.751 |
| O | 26.295 | 5.941  | 18.23  |
| H | 25.431 | 5.529  | 18.237 |
| H | 26.908 | 5.213  | 18.332 |
| O | 17.242 | 11.293 | 18.992 |
| H | 17.164 | 10.418 | 18.613 |
| H | 16.411 | 11.72  | 18.781 |
| O | 19.435 | 3.691  | 24.066 |
| H | 18.86  | 4.443  | 24.203 |
| H | 20.319 | 4.041  | 24.182 |
| O | 11.883 | 15.87  | 9.605  |
| H | 12.188 | 16.476 | 10.28  |
| H | 11.015 | 16.195 | 9.365  |
| O | 24.303 | 15.474 | 8.769  |
| H | 24.325 | 16.277 | 8.249  |
| H | 25.183 | 15.403 | 9.137  |
| O | 10.345 | 24.772 | 26.483 |
| H | 10.794 | 24.263 | 25.808 |
| H | 11.047 | 25.231 | 26.943 |
| O | 6.743  | 23.957 | 24.422 |
| H | 7.142  | 23.753 | 25.268 |
| H | 7.408  | 23.714 | 23.778 |
| O | 8.702  | 28.755 | 24.255 |
| H | 8.471  | 28.172 | 23.532 |
| H | 8.819  | 28.173 | 25.006 |
| O | 4.606  | 20.151 | 25.387 |
| H | 5.257  | 20.411 | 26.038 |
| H | 4.765  | 19.218 | 25.248 |
| O | 11.233 | 24.062 | 21.261 |
| H | 10.486 | 23.476 | 21.134 |
| H | 11.931 | 23.493 | 21.584 |
| O | 9.48   | 27.556 | 15.717 |
| H | 10.067 | 26.861 | 15.418 |
| H | 9.744  | 27.719 | 16.622 |
| O | 11.536 | 26.417 | 22.465 |

|   |        |        |        |
|---|--------|--------|--------|
| H | 10.698 | 26.726 | 22.807 |
| H | 11.308 | 25.667 | 21.915 |
| O | 7.942  | 27.289 | 21.811 |
| H | 7.106  | 26.846 | 21.668 |
| H | 7.809  | 28.17  | 21.461 |
| O | 12.427 | 28.253 | 11.606 |
| H | 12.447 | 27.435 | 12.103 |
| H | 13.199 | 28.734 | 11.905 |
| O | 7.57   | 23.724 | 19.557 |
| H | 6.861  | 23.086 | 19.479 |
| H | 7.503  | 24.255 | 18.763 |
| O | 5.186  | 26.955 | 22.474 |
| H | 4.794  | 27.671 | 21.974 |
| H | 5.111  | 27.232 | 23.387 |
| O | 9.281  | 21.829 | 21.265 |
| H | 8.698  | 22.45  | 20.829 |
| H | 9.496  | 21.187 | 20.588 |
| O | 10.03  | 27.47  | 19.351 |
| H | 9.481  | 28.238 | 19.507 |
| H | 9.7    | 26.811 | 19.962 |
| O | 13.439 | 29.575 | 22.515 |
| H | 14.23  | 29.153 | 22.849 |
| H | 13.406 | 30.417 | 22.97  |
| O | 8.322  | 22.971 | 26.654 |
| H | 7.712  | 23.213 | 27.351 |
| H | 8.996  | 23.651 | 26.679 |
| O | 7.694  | 13.829 | 26.977 |
| H | 6.99   | 13.731 | 26.335 |
| H | 8.345  | 14.375 | 26.537 |
| O | 7.121  | 15.997 | 28.933 |
| H | 6.785  | 15.262 | 28.42  |
| H | 6.596  | 15.99  | 29.733 |
| O | 3.119  | 18.475 | 18.734 |
| H | 3.746  | 17.906 | 18.288 |
| H | 2.54   | 18.786 | 18.038 |
| O | 8.495  | 8.206  | 19.487 |
| H | 9.292  | 8.272  | 18.961 |
| H | 8.139  | 7.343  | 19.276 |
| O | 3.798  | 21.594 | 23.096 |
| H | 3.677  | 20.919 | 22.428 |
| H | 4.474  | 21.241 | 23.674 |
| O | 19.124 | 16.275 | 29.635 |
| H | 19.402 | 15.702 | 30.349 |
| H | 19.934 | 16.501 | 29.179 |
| O | 11.99  | 9.548  | 24.076 |
| H | 11.727 | 10.048 | 23.304 |
| H | 11.218 | 9.557  | 24.642 |



|   |        |        |        |
|---|--------|--------|--------|
| O | 11.833 | 10.956 | 29.762 |
| H | 12.33  | 11.567 | 30.306 |
| H | 11.999 | 11.243 | 28.865 |
| O | 11.687 | 17.244 | 31.975 |
| H | 11.846 | 17.457 | 31.055 |
| H | 10.755 | 17.029 | 32.013 |
| O | 10.627 | 16.069 | 14.79  |
| H | 10.043 | 16.794 | 15.01  |
| H | 11.485 | 16.478 | 14.678 |
| O | 7.258  | 25.223 | 17.33  |
| H | 7.475  | 26.051 | 17.759 |
| H | 6.914  | 25.48  | 16.474 |
| O | 7.461  | 13.033 | 12.694 |
| H | 7.663  | 12.851 | 11.777 |
| H | 7.797  | 12.273 | 13.17  |
| O | 4.969  | 14.157 | 19.343 |
| H | 5.51   | 14.933 | 19.496 |
| H | 5.238  | 13.844 | 18.479 |
| O | 5.269  | 16.773 | 17.728 |
| H | 5.056  | 17.109 | 16.857 |
| H | 5.421  | 15.838 | 17.593 |
| O | 6.669  | 17.421 | 14.285 |
| H | 5.782  | 17.404 | 14.643 |
| H | 7.076  | 16.619 | 14.614 |
| O | 3.784  | 19.597 | 21.196 |
| H | 3.605  | 19.147 | 20.371 |
| H | 3.726  | 18.91  | 21.861 |
| O | 3.905  | 17.383 | 12.472 |
| H | 4.436  | 16.586 | 12.481 |
| H | 4.476  | 18.055 | 12.844 |
| O | 6.793  | 20.993 | 16.992 |
| H | 7.708  | 21.26  | 17.083 |
| H | 6.708  | 20.232 | 17.566 |
| O | 10.889 | 20.232 | 15.06  |
| H | 10.994 | 20.785 | 14.286 |
| H | 11.766 | 20.18  | 15.439 |
| O | 6.589  | 20.397 | 27.023 |
| H | 7.251  | 21.087 | 27.054 |
| H | 6.629  | 19.987 | 27.887 |
| O | 10.311 | 13.591 | 14.341 |
| H | 11.167 | 13.391 | 13.961 |
| H | 10.27  | 14.547 | 14.347 |
| O | 22.708 | 27.764 | 19.976 |
| H | 23.029 | 28.05  | 20.831 |
| H | 21.756 | 27.738 | 20.074 |
| O | 6.059  | 26.458 | 15.133 |
| H | 6.193  | 27.093 | 14.43  |

|   |        |        |        |
|---|--------|--------|--------|
| H | 5.346  | 26.826 | 15.655 |
| O | 15.493 | 21.324 | 26.146 |
| H | 15.28  | 22.159 | 25.728 |
| H | 15.233 | 21.441 | 27.059 |
| O | 4.397  | 14.864 | 26.829 |
| H | 4.099  | 14.296 | 26.118 |
| H | 3.934  | 14.542 | 27.603 |
| O | 4.572  | 17.526 | 26.449 |
| H | 4.46   | 16.583 | 26.567 |
| H | 3.879  | 17.918 | 26.982 |
| O | 9.923  | 11.473 | 21.452 |
| H | 10.413 | 11.212 | 20.673 |
| H | 10.595 | 11.737 | 22.08  |
| O | 9.436  | 21.342 | 17.242 |
| H | 9.867  | 22.169 | 17.025 |
| H | 9.86   | 20.696 | 16.678 |
| O | 6.216  | 20.945 | 14.084 |
| H | 5.983  | 20.699 | 14.979 |
| H | 6.268  | 21.9   | 14.103 |
| O | 12.158 | 18.656 | 26.6   |
| H | 11.225 | 18.793 | 26.439 |
| H | 12.596 | 19.249 | 25.989 |
| O | 10.421 | 24.811 | 14.196 |
| H | 10.087 | 25.32  | 13.456 |
| H | 11.367 | 24.955 | 14.177 |
| O | 13.184 | 21.666 | 21.343 |
| H | 13.397 | 20.762 | 21.574 |
| H | 12.751 | 21.6   | 20.492 |
| O | 4.004  | 23.979 | 24.467 |
| H | 4.953  | 24.109 | 24.476 |
| H | 3.884  | 23.118 | 24.067 |
| O | 16.458 | 16.79  | 6.819  |
| H | 16.051 | 17.121 | 6.019  |
| H | 17.349 | 16.558 | 6.557  |
| O | 8.511  | 15.399 | 24.713 |
| H | 8.957  | 16.163 | 24.349 |
| H | 7.882  | 15.144 | 24.038 |
| O | 8.856  | 11.454 | 17.814 |
| H | 9.752  | 11.453 | 18.151 |
| H | 8.62   | 12.381 | 17.765 |
| O | 11.364 | 11.877 | 18.304 |
| H | 11.246 | 12.788 | 18.033 |
| H | 12.181 | 11.607 | 17.884 |
| O | 11.853 | 25.183 | 18.281 |
| H | 11.887 | 24.91  | 19.198 |
| H | 11.671 | 26.122 | 18.318 |
| O | 5.727  | 16.408 | 23.623 |

|   |        |        |        |
|---|--------|--------|--------|
| H | 4.838  | 16.737 | 23.752 |
| H | 6.176  | 16.598 | 24.447 |
| O | 5.582  | 11.634 | 25.208 |
| H | 5.295  | 11.249 | 24.379 |
| H | 6.379  | 11.152 | 25.432 |
| O | 8.719  | 11.419 | 14.191 |
| H | 8.544  | 10.991 | 15.029 |
| H | 9.495  | 11.956 | 14.354 |
| O | 6.273  | 23.876 | 28.295 |
| H | 5.336  | 24.071 | 28.309 |
| H | 6.473  | 23.596 | 29.188 |
| O | 6.503  | 23.859 | 13.896 |
| H | 7.332  | 23.712 | 14.352 |
| H | 6.243  | 24.744 | 14.152 |
| O | 13.069 | 12.808 | 13.633 |
| H | 13.689 | 12.119 | 13.395 |
| H | 13.468 | 13.241 | 14.388 |
| O | 6.632  | 18.898 | 19.134 |
| H | 6.882  | 18.464 | 19.949 |
| H | 6.162  | 18.226 | 18.64  |
| O | 4.124  | 21.273 | 16.129 |
| H | 3.35   | 21.534 | 16.628 |
| H | 4.86   | 21.629 | 16.627 |
| O | 10.827 | 15.006 | 21.802 |
| H | 11.27  | 15.512 | 21.121 |
| H | 10.502 | 15.664 | 22.417 |
| O | 11.4   | 11.911 | 26.723 |
| H | 12.157 | 12.312 | 27.149 |
| H | 11.041 | 12.605 | 26.17  |
| O | 3.261  | 17.644 | 23.186 |
| H | 2.591  | 17.011 | 22.925 |
| H | 2.892  | 18.08  | 23.954 |
| O | 8.779  | 9.041  | 16.468 |
| H | 9.601  | 8.686  | 16.807 |
| H | 8.641  | 9.844  | 16.97  |
| O | 11.083 | 14.387 | 17.521 |
| H | 10.829 | 15.24  | 17.873 |
| H | 11.042 | 14.498 | 16.572 |
| O | 5.413  | 14.961 | 12.896 |
| H | 5.8    | 14.634 | 12.084 |
| H | 6.119  | 15.452 | 13.317 |
| O | 13.664 | 10.862 | 21.141 |
| H | 13.498 | 10.818 | 20.199 |
| H | 13.795 | 11.794 | 21.317 |
| O | 8.069  | 13.676 | 10.149 |
| H | 7.756  | 14.578 | 10.086 |
| H | 8.456  | 13.497 | 9.292  |

|   |        |        |        |
|---|--------|--------|--------|
| O | 10.412 | 23.596 | 16.652 |
| H | 10.728 | 24.219 | 17.306 |
| H | 10.385 | 24.097 | 15.837 |
| O | 7.234  | 18.164 | 22.144 |
| H | 7.628  | 18.837 | 22.698 |
| H | 6.779  | 17.586 | 22.756 |
| O | 5.534  | 13.837 | 16.786 |
| H | 6.369  | 13.912 | 16.323 |
| H | 4.893  | 13.663 | 16.096 |
| O | 9.675  | 23.694 | 10.775 |
| H | 9.012  | 23.8   | 10.092 |
| H | 9.783  | 24.572 | 11.142 |
| O | 5.391  | 21.911 | 19.72  |
| H | 5.166  | 21.406 | 20.501 |
| H | 5.839  | 21.286 | 19.15  |
| O | 12.741 | 18.302 | 11.121 |
| H | 11.822 | 18.561 | 11.053 |
| H | 13.228 | 19.063 | 10.804 |
| O | 5.821  | 22.106 | 11.546 |
| H | 6.054  | 21.497 | 12.247 |
| H | 5.888  | 22.972 | 11.949 |
| O | 2.897  | 22.367 | 18.607 |
| H | 2.381  | 22.61  | 19.376 |
| H | 3.805  | 22.41  | 18.905 |
| O | 8.687  | 16.129 | 12.3   |
| H | 8.632  | 16.325 | 11.364 |
| H | 8.437  | 15.207 | 12.366 |
| O | 10.657 | 7.817  | 17.783 |
| H | 10.612 | 6.874  | 17.626 |
| H | 11.563 | 8.05   | 17.581 |
| O | 4.919  | 11.137 | 22.608 |
| H | 5.588  | 10.882 | 21.972 |
| H | 4.279  | 11.632 | 22.097 |
| O | 14.027 | 13.954 | 10.726 |
| H | 13.286 | 14.48  | 10.426 |
| H | 13.64  | 13.308 | 11.316 |
| O | 6.883  | 16.082 | 9.474  |
| H | 6.474  | 16.936 | 9.614  |
| H | 6.708  | 15.881 | 8.554  |

**Table S17. PYP chromophore + 574 waters**

| Method    | Time(s) | iterations | E (eV) | f   |
|-----------|---------|------------|--------|-----|
| CIS       | 1583.5  | 12         | 3.66   | 1.6 |
| TD-BLYP   | -       | -          | -      | -   |
| TD-B3LYP* | 833.6   | 3          | -0.05  | 0.0 |

\* residual converged to 0.00003

|   |        |        |        |
|---|--------|--------|--------|
| C | 22.967 | 16.81  | 19.507 |
| C | 24.27  | 16.774 | 18.931 |
| C | 24.617 | 15.671 | 18.139 |
| C | 23.681 | 14.66  | 17.949 |
| C | 22.419 | 14.608 | 18.558 |
| C | 22.092 | 15.731 | 19.368 |
| S | 22.3   | 18.226 | 20.373 |
| C | 21.107 | 18.737 | 19.24  |
| C | 19.881 | 18.611 | 19.724 |
| O | 21.503 | 18.978 | 18.056 |
| C | 18.678 | 18.857 | 18.895 |
| C | 17.412 | 18.7   | 19.379 |
| C | 16.267 | 18.768 | 18.424 |
| C | 15.007 | 18.753 | 18.949 |
| C | 14.627 | 18.622 | 20.339 |
| C | 15.744 | 18.498 | 21.241 |
| C | 17.075 | 18.511 | 20.793 |
| O | 13.416 | 18.649 | 20.62  |
| H | 25.016 | 17.532 | 19.156 |
| H | 25.561 | 15.727 | 17.603 |
| H | 23.959 | 13.891 | 17.234 |
| H | 21.774 | 13.742 | 18.433 |
| H | 21.138 | 15.665 | 19.885 |
| H | 19.762 | 18.159 | 20.708 |
| H | 18.901 | 19.227 | 17.895 |
| H | 16.528 | 18.974 | 17.391 |
| H | 14.139 | 18.825 | 18.303 |
| H | 15.6   | 18.345 | 22.305 |
| H | 17.886 | 18.502 | 21.514 |
| O | 29.914 | 28.662 | 20.051 |
| H | 28.96  | 28.597 | 20.094 |
| H | 30.203 | 28.55  | 20.956 |
| O | 29.182 | 25.39  | 22.779 |
| H | 29.281 | 25.376 | 23.731 |
| H | 28.342 | 25.825 | 22.632 |
| O | 27.666 | 29.01  | 16.826 |
| H | 26.744 | 28.833 | 17.014 |
| H | 28.124 | 28.779 | 17.634 |
| O | 29.551 | 22.926 | 11.032 |
| H | 30.104 | 23.7   | 10.923 |
| H | 29.77  | 22.597 | 11.904 |

|   |        |        |        |
|---|--------|--------|--------|
| O | 25.88  | 25.718 | 28.046 |
| H | 25.602 | 26.061 | 28.895 |
| H | 25.875 | 24.767 | 28.158 |
| O | 33.894 | 22.795 | 16.377 |
| H | 34.33  | 22.95  | 17.215 |
| H | 33.272 | 22.09  | 16.558 |
| O | 30.112 | 21.211 | 18.047 |
| H | 30.308 | 22.125 | 18.252 |
| H | 29.292 | 21.246 | 17.554 |
| O | 32.027 | 24.623 | 10.821 |
| H | 32.335 | 24.527 | 11.722 |
| H | 32.71  | 24.214 | 10.289 |
| O | 24.075 | 15.499 | 29.422 |
| H | 24.789 | 14.887 | 29.603 |
| H | 23.281 | 15.008 | 29.631 |
| O | 26.423 | 14.107 | 29.296 |
| H | 26.561 | 13.165 | 29.395 |
| H | 26.809 | 14.318 | 28.445 |
| O | 27.383 | 22.332 | 28.542 |
| H | 28.134 | 22.88  | 28.772 |
| H | 27.568 | 21.487 | 28.951 |
| O | 25.825 | 17.56  | 30.061 |
| H | 25.435 | 16.932 | 29.452 |
| H | 25.968 | 17.058 | 30.863 |
| O | 28.391 | 13.11  | 22.223 |
| H | 29.252 | 12.971 | 21.829 |
| H | 28.33  | 12.444 | 22.907 |
| O | 30.871 | 21.739 | 29.017 |
| H | 31.739 | 21.702 | 29.418 |
| H | 30.266 | 21.566 | 29.739 |
| O | 29.874 | 10.396 | 28.124 |
| H | 29.975 | 11.045 | 27.428 |
| H | 30.526 | 9.725  | 27.923 |
| O | 31.475 | 22.004 | 26.329 |
| H | 31.137 | 21.63  | 27.143 |
| H | 31.181 | 21.401 | 25.647 |
| O | 34.454 | 8.83   | 23.885 |
| H | 34.391 | 8.547  | 22.973 |
| H | 34.633 | 9.769  | 23.833 |
| O | 31.852 | 17.267 | 28.442 |
| H | 32.534 | 17.817 | 28.058 |
| H | 32.119 | 17.156 | 29.355 |
| O | 29.307 | 17.709 | 27.704 |
| H | 30.224 | 17.766 | 27.973 |
| H | 29.295 | 18.067 | 26.817 |
| O | 33.709 | 17.406 | 9.427  |
| H | 34.618 | 17.29  | 9.703  |

|   |        |        |        |
|---|--------|--------|--------|
| H | 33.76  | 17.531 | 8.48   |
| O | 24.938 | 16.847 | 11.925 |
| H | 24.601 | 17.235 | 12.732 |
| H | 25.689 | 16.325 | 12.206 |
| O | 32.469 | 14.752 | 21.385 |
| H | 33.348 | 14.759 | 21.766 |
| H | 32.195 | 13.836 | 21.431 |
| O | 30.816 | 19.132 | 13.418 |
| H | 30.974 | 18.346 | 13.94  |
| H | 31.54  | 19.153 | 12.792 |
| O | 30.284 | 15.257 | 11.884 |
| H | 31.234 | 15.279 | 11.994 |
| H | 30.077 | 14.33  | 11.768 |
| O | 36.186 | 20.699 | 18.464 |
| H | 36.55  | 20.393 | 19.295 |
| H | 35.267 | 20.432 | 18.492 |
| O | 32.263 | 11.353 | 17.063 |
| H | 32.41  | 10.514 | 17.499 |
| H | 31.311 | 11.441 | 17.027 |
| O | 33.28  | 18.588 | 15.193 |
| H | 33.815 | 17.822 | 15.401 |
| H | 32.532 | 18.235 | 14.713 |
| O | 33.563 | 9.022  | 21.216 |
| H | 34.106 | 9.499  | 20.588 |
| H | 32.971 | 8.501  | 20.675 |
| O | 26.315 | 12.269 | 19.428 |
| H | 25.586 | 12.142 | 20.035 |
| H | 26.005 | 11.901 | 18.601 |
| O | 24.721 | 18.014 | 7.559  |
| H | 23.933 | 18.514 | 7.772  |
| H | 25.27  | 18.627 | 7.07   |
| O | 29.689 | 10.354 | 19.041 |
| H | 30.009 | 9.628  | 18.504 |
| H | 28.925 | 10.684 | 18.568 |
| O | 31.465 | 16.672 | 14.469 |
| H | 32.168 | 16.029 | 14.378 |
| H | 30.721 | 16.168 | 14.799 |
| O | 34.923 | 10.571 | 19.564 |
| H | 35.348 | 10.322 | 18.743 |
| H | 35.619 | 10.977 | 20.08  |
| O | 30.751 | 18.966 | 19.536 |
| H | 30.85  | 19.768 | 19.022 |
| H | 29.824 | 18.742 | 19.454 |
| O | 35.482 | 20.719 | 24.898 |
| H | 35.54  | 21.194 | 24.069 |
| H | 34.566 | 20.446 | 24.954 |
| O | 21.624 | 17.545 | 15.698 |

|   |        |        |        |
|---|--------|--------|--------|
| H | 21.844 | 17.862 | 16.574 |
| H | 21.068 | 18.23  | 15.328 |
| O | 27.301 | 20.143 | 19.909 |
| H | 26.457 | 20.142 | 19.458 |
| H | 27.68  | 19.287 | 19.713 |
| O | 32.002 | 10.998 | 22.33  |
| H | 32.425 | 10.517 | 21.619 |
| H | 31.574 | 11.737 | 21.899 |
| O | 29.855 | 14.696 | 24.663 |
| H | 29.947 | 14.331 | 23.783 |
| H | 29.069 | 15.241 | 24.615 |
| O | 31.889 | 16.56  | 19.452 |
| H | 32.012 | 16.092 | 20.278 |
| H | 31.432 | 17.364 | 19.699 |
| O | 27.763 | 8.742  | 24.655 |
| H | 27.349 | 7.971  | 25.04  |
| H | 28.329 | 8.392  | 23.967 |
| O | 30.544 | 12.556 | 20.427 |
| H | 30.218 | 11.819 | 19.909 |
| H | 30.792 | 13.214 | 19.777 |
| O | 32.612 | 20.608 | 17.136 |
| H | 31.709 | 20.388 | 17.362 |
| H | 32.89  | 19.906 | 16.547 |
| O | 28.345 | 21.116 | 22.423 |
| H | 29.083 | 21.585 | 22.033 |
| H | 27.883 | 20.733 | 21.678 |
| O | 28.626 | 7.578  | 18.14  |
| H | 29.131 | 7.399  | 18.934 |
| H | 27.944 | 6.906  | 18.134 |
| O | 34.025 | 19.389 | 20.825 |
| H | 33.18  | 19.249 | 21.253 |
| H | 33.999 | 18.825 | 20.053 |
| O | 24.737 | 20.209 | 19.019 |
| H | 24.671 | 20.885 | 18.345 |
| H | 23.926 | 19.706 | 18.934 |
| O | 24.407 | 14.872 | 14.057 |
| H | 23.679 | 14.548 | 14.587 |
| H | 24.691 | 15.67  | 14.502 |
| O | 27.84  | 14.376 | 19.85  |
| H | 27.952 | 14.292 | 20.797 |
| H | 27.401 | 13.566 | 19.588 |
| O | 29.304 | 15.125 | 15.496 |
| H | 29.712 | 15.071 | 16.36  |
| H | 28.974 | 14.241 | 15.332 |
| O | 30.935 | 23.768 | 18.813 |
| H | 31.045 | 24.586 | 19.299 |
| H | 31.712 | 23.253 | 19.032 |



|   |        |        |        |
|---|--------|--------|--------|
| O | 22.565 | 11.422 | 7.263  |
| H | 21.77  | 10.969 | 6.982  |
| H | 23.22  | 10.729 | 7.341  |
| O | 33.966 | 14.561 | 9.506  |
| H | 33.515 | 15.401 | 9.592  |
| H | 34.874 | 14.796 | 9.311  |
| O | 30.88  | 7.56   | 16.768 |
| H | 29.99  | 7.73   | 17.076 |
| H | 30.996 | 6.616  | 16.879 |
| O | 29.02  | 27.364 | 13.686 |
| H | 29.65  | 27.404 | 14.405 |
| H | 28.385 | 26.702 | 13.96  |
| O | 30.268 | 23.047 | 21.979 |
| H | 31.187 | 23.245 | 21.797 |
| H | 29.889 | 23.888 | 22.238 |
| O | 27.648 | 21.192 | 16.796 |
| H | 27.35  | 20.499 | 16.206 |
| H | 26.861 | 21.705 | 16.979 |
| O | 29.094 | 23.158 | 15.712 |
| H | 28.684 | 22.32  | 15.928 |
| H | 29.846 | 22.923 | 15.168 |
| O | 34.864 | 20.878 | 14.109 |
| H | 35.24  | 20.289 | 13.454 |
| H | 34.281 | 20.321 | 14.625 |
| O | 33.093 | 26.646 | 22.107 |
| H | 32.438 | 26.688 | 22.803 |
| H | 33.395 | 25.738 | 22.117 |
| O | 35.958 | 10.673 | 13.915 |
| H | 35.175 | 10.32  | 13.493 |
| H | 35.815 | 10.525 | 14.85  |
| O | 32.982 | 14.146 | 13.03  |
| H | 33.495 | 13.501 | 12.543 |
| H | 33.138 | 13.931 | 13.95  |
| O | 29.29  | 12.914 | 5.866  |
| H | 28.755 | 13.501 | 5.332  |
| H | 29.356 | 13.355 | 6.713  |
| O | 35.239 | 24.226 | 22.752 |
| H | 35.057 | 23.301 | 22.584 |
| H | 35.71  | 24.522 | 21.974 |
| O | 24.198 | 19.84  | 23.687 |
| H | 24.475 | 20.696 | 23.361 |
| H | 23.265 | 19.795 | 23.477 |
| O | 27.776 | 19.346 | 29.523 |
| H | 28.367 | 18.91  | 28.909 |
| H | 27.057 | 18.725 | 29.643 |
| O | 31.049 | 20.49  | 23.466 |
| H | 31.305 | 20.855 | 22.619 |

|   |        |        |        |
|---|--------|--------|--------|
| H | 30.106 | 20.348 | 23.391 |
| O | 33.02  | 19.355 | 24.959 |
| H | 32.359 | 19.651 | 24.333 |
| H | 32.922 | 18.403 | 24.978 |
| O | 35.863 | 19.669 | 11.703 |
| H | 35.851 | 20.058 | 10.828 |
| H | 36.775 | 19.412 | 11.839 |
| O | 34.337 | 17.381 | 18.699 |
| H | 33.413 | 17.138 | 18.745 |
| H | 34.589 | 17.193 | 17.794 |
| O | 36.349 | 14.37  | 16.428 |
| H | 35.776 | 13.647 | 16.683 |
| H | 36.874 | 14.547 | 17.209 |
| O | 30.684 | 26.111 | 20.225 |
| H | 30.14  | 25.942 | 20.994 |
| H | 30.563 | 27.043 | 20.045 |
| O | 28.875 | 25.274 | 17.405 |
| H | 29.024 | 24.584 | 16.759 |
| H | 28.96  | 24.832 | 18.25  |
| O | 27.561 | 17.119 | 16.412 |
| H | 27.549 | 17.874 | 15.824 |
| H | 28.209 | 16.527 | 16.028 |
| O | 28.503 | 15.262 | 30.777 |
| H | 29.239 | 14.89  | 30.291 |
| H | 27.726 | 14.937 | 30.321 |
| O | 25.055 | 10.896 | 15.923 |
| H | 24.361 | 10.877 | 15.264 |
| H | 25.56  | 10.099 | 15.762 |
| O | 27.663 | 15.508 | 12.777 |
| H | 28.527 | 15.453 | 12.369 |
| H | 27.845 | 15.681 | 13.701 |
| O | 26.642 | 8.919  | 16.155 |
| H | 27.111 | 8.832  | 15.325 |
| H | 27.2   | 8.476  | 16.794 |
| O | 30.043 | 28.447 | 22.688 |
| H | 30.94  | 28.47  | 23.023 |
| H | 29.544 | 28     | 23.371 |
| O | 32.886 | 23.254 | 20.961 |
| H | 33.701 | 22.752 | 20.958 |
| H | 33.126 | 24.103 | 20.589 |
| O | 30.396 | 12.661 | 26.533 |
| H | 29.905 | 13.14  | 27.202 |
| H | 30.326 | 13.206 | 25.749 |
| O | 33.891 | 19.05  | 27.854 |
| H | 33.348 | 19.395 | 27.144 |
| H | 34.755 | 19.431 | 27.701 |
| O | 30.413 | 27.058 | 16.275 |

|   |        |        |        |
|---|--------|--------|--------|
| H | 29.895 | 26.477 | 16.832 |
| H | 31.257 | 26.616 | 16.186 |
| O | 22.286 | 8.889  | 11.272 |
| H | 23.098 | 9.247  | 10.913 |
| H | 22.562 | 8.394  | 12.043 |
| O | 34.969 | 16.574 | 15.88  |
| H | 35.407 | 15.772 | 16.167 |
| H | 35.513 | 16.901 | 15.163 |
| O | 26.164 | 11.202 | 7.345  |
| H | 25.545 | 10.472 | 7.333  |
| H | 25.8   | 11.815 | 7.984  |
| O | 34.181 | 9.003  | 12.582 |
| H | 33.626 | 8.682  | 13.292 |
| H | 34.185 | 8.293  | 11.941 |
| O | 32.535 | 25.399 | 16.466 |
| H | 32.791 | 25.655 | 17.352 |
| H | 33.049 | 24.612 | 16.286 |
| O | 29.654 | 20.42  | 6.361  |
| H | 29.741 | 21.306 | 6.711  |
| H | 29.071 | 19.975 | 6.976  |
| O | 27.272 | 23.704 | 9.485  |
| H | 26.778 | 24.292 | 10.057 |
| H | 28.073 | 23.512 | 9.972  |
| O | 33.233 | 22.995 | 13.617 |
| H | 33.86  | 22.392 | 13.218 |
| H | 33.294 | 22.817 | 14.555 |
| O | 33.064 | 19.005 | 11.754 |
| H | 33.956 | 19.326 | 11.886 |
| H | 33.051 | 18.7   | 10.847 |
| O | 30.605 | 17.651 | 8.116  |
| H | 29.808 | 18.112 | 7.853  |
| H | 30.494 | 17.497 | 9.054  |
| O | 31.29  | 15.336 | 7.075  |
| H | 31.237 | 16.239 | 7.387  |
| H | 30.501 | 14.916 | 7.417  |
| O | 28.183 | 20.556 | 11.69  |
| H | 27.261 | 20.81  | 11.729 |
| H | 28.556 | 21.113 | 11.007 |
| O | 28.184 | 19.383 | 14.719 |
| H | 27.476 | 19.592 | 14.11  |
| H | 28.984 | 19.585 | 14.233 |
| O | 24.872 | 12.144 | 9.43   |
| H | 24.826 | 12.666 | 10.231 |
| H | 23.958 | 11.996 | 9.188  |
| O | 29.221 | 6.522  | 10.379 |
| H | 28.456 | 5.947  | 10.342 |
| H | 29.57  | 6.513  | 9.487  |

|   |        |        |        |
|---|--------|--------|--------|
| O | 33.971 | 12.512 | 11.025 |
| H | 34.129 | 13.342 | 10.575 |
| H | 34.285 | 11.845 | 10.414 |
| O | 24.271 | 2.462  | 24.324 |
| H | 24.276 | 2.433  | 25.281 |
| H | 23.367 | 2.68   | 24.096 |
| O | 34.115 | 11.559 | 24.22  |
| H | 33.339 | 11.165 | 23.821 |
| H | 33.861 | 11.723 | 25.128 |
| O | 29.064 | 5.922  | 23.31  |
| H | 29.919 | 5.734  | 23.696 |
| H | 28.435 | 5.683  | 23.992 |
| O | 27.828 | 5.596  | 25.887 |
| H | 28.47  | 5.873  | 26.541 |
| H | 27.619 | 4.693  | 26.125 |
| O | 26.832 | 5.189  | 21.622 |
| H | 27.252 | 5.047  | 20.773 |
| H | 27.56  | 5.309  | 22.232 |
| O | 27.915 | 9.266  | 11.271 |
| H | 28.66  | 9.642  | 10.801 |
| H | 28.008 | 8.321  | 11.15  |
| O | 29.43  | 4.772  | 14.03  |
| H | 30.115 | 5.18   | 14.559 |
| H | 29.462 | 5.24   | 13.195 |
| O | 31.206 | 3.357  | 19.326 |
| H | 31.592 | 3.95   | 19.971 |
| H | 31.079 | 2.536  | 19.801 |
| O | 34.216 | 13.143 | 17.637 |
| H | 33.781 | 13.513 | 18.405 |
| H | 33.591 | 12.503 | 17.294 |
| O | 31.702 | 10.129 | 12.535 |
| H | 31.309 | 9.286  | 12.76  |
| H | 32.645 | 9.98   | 12.605 |
| O | 24.574 | 1.164  | 20.131 |
| H | 23.643 | 0.949  | 20.082 |
| H | 24.638 | 1.789  | 20.853 |
| O | 26.913 | 4.285  | 15.371 |
| H | 26.952 | 3.337  | 15.496 |
| H | 27.829 | 4.556  | 15.306 |
| O | 30.626 | 7.601  | 12.479 |
| H | 30.147 | 7.318  | 11.699 |
| H | 31.486 | 7.19   | 12.393 |
| O | 32.572 | 8.073  | 14.925 |
| H | 33.368 | 7.745  | 15.343 |
| H | 31.863 | 7.787  | 15.501 |
| O | 27.036 | 1.61   | 16.375 |
| H | 27.747 | 1.122  | 16.791 |

|   |        |        |        |
|---|--------|--------|--------|
| H | 27.079 | 1.356  | 15.453 |
| O | 32.539 | 7.536  | 19.134 |
| H | 32.199 | 7.545  | 18.239 |
| H | 33.388 | 7.099  | 19.063 |
| O | 25.355 | 8.517  | 22.306 |
| H | 25.206 | 7.892  | 23.016 |
| H | 26.306 | 8.621  | 22.275 |
| O | 22.716 | 6.274  | 26.162 |
| H | 22.311 | 6.96   | 26.692 |
| H | 22.078 | 6.099  | 25.47  |
| O | 29.441 | 10.867 | 16.12  |
| H | 29.416 | 10.227 | 15.408 |
| H | 28.616 | 11.345 | 16.04  |
| O | 31.122 | 12.532 | 11.065 |
| H | 31.196 | 11.965 | 11.832 |
| H | 32.015 | 12.84  | 10.907 |
| O | 28.552 | 8.795  | 13.93  |
| H | 29.499 | 8.672  | 13.861 |
| H | 28.268 | 8.976  | 13.034 |
| O | 29.73  | 10.361 | 9.699  |
| H | 29.491 | 10.671 | 8.826  |
| H | 30.535 | 10.834 | 9.91   |
| O | 30.307 | 8.048  | 7.832  |
| H | 29.872 | 7.646  | 7.079  |
| H | 29.927 | 8.925  | 7.887  |
| O | 9.173  | 27.776 | 28.296 |
| H | 8.972  | 27.205 | 29.038 |
| H | 8.339  | 28.194 | 28.083 |
| O | 26.718 | 26.606 | 22.365 |
| H | 26.922 | 27.468 | 22.002 |
| H | 25.77  | 26.522 | 22.263 |
| O | 12.169 | 19.132 | 33.848 |
| H | 12.133 | 18.575 | 33.07  |
| H | 11.785 | 19.962 | 33.566 |
| O | 20.485 | 24.189 | 26.946 |
| H | 19.824 | 23.499 | 26.989 |
| H | 20.982 | 24.095 | 27.759 |
| O | 13.474 | 28.382 | 29.119 |
| H | 14.419 | 28.431 | 29.264 |
| H | 13.146 | 29.24  | 29.391 |
| O | 20.676 | 27.261 | 30.028 |
| H | 20.794 | 26.311 | 30.033 |
| H | 21.132 | 27.563 | 30.814 |
| O | 17.431 | 24.711 | 33.291 |
| H | 18.114 | 24.165 | 32.902 |
| H | 17.703 | 25.608 | 33.098 |
| O | 14.234 | 29.451 | 25.8   |

|   |        |        |        |
|---|--------|--------|--------|
| H | 13.729 | 28.82  | 25.288 |
| H | 13.582 | 30.076 | 26.118 |
| O | 21.841 | 25.67  | 24.919 |
| H | 21.461 | 24.958 | 25.433 |
| H | 22.774 | 25.46  | 24.871 |
| O | 23.943 | 26.468 | 22.389 |
| H | 23.24  | 27.114 | 22.464 |
| H | 23.571 | 25.769 | 21.852 |
| O | 12.238 | 24.196 | 24.379 |
| H | 12.264 | 25.01  | 23.876 |
| H | 13.158 | 23.962 | 24.504 |
| O | 14.585 | 30.731 | 16.435 |
| H | 15.025 | 30.964 | 15.618 |
| H | 15.297 | 30.594 | 17.06  |
| O | 13.619 | 27.917 | 18.44  |
| H | 14.291 | 28.521 | 18.757 |
| H | 13.651 | 27.182 | 19.051 |
| O | 18.176 | 26.857 | 16.936 |
| H | 17.888 | 25.989 | 17.218 |
| H | 17.621 | 27.464 | 17.426 |
| O | 24.608 | 30.968 | 17.556 |
| H | 24.77  | 31.723 | 16.991 |
| H | 24.687 | 31.312 | 18.446 |
| O | 13.129 | 20.587 | 24.819 |
| H | 14.035 | 20.781 | 25.059 |
| H | 12.692 | 21.438 | 24.822 |
| O | 23.146 | 31.118 | 22.018 |
| H | 22.361 | 31.601 | 22.276 |
| H | 23.577 | 31.685 | 21.38  |
| O | 21.864 | 31.131 | 14.358 |
| H | 22.43  | 31.33  | 13.612 |
| H | 22.398 | 30.572 | 14.922 |
| O | 21.06  | 28.306 | 25.498 |
| H | 20.998 | 27.406 | 25.18  |
| H | 21.99  | 28.522 | 25.427 |
| O | 8.368  | 24.538 | 22.244 |
| H | 8.26   | 25.485 | 22.33  |
| H | 8.09   | 24.345 | 21.349 |
| O | 14.801 | 26.026 | 20.08  |
| H | 15.168 | 25.155 | 19.923 |
| H | 14.58  | 26.028 | 21.011 |
| O | 11.605 | 29.867 | 17.285 |
| H | 11.941 | 29.176 | 17.856 |
| H | 12.281 | 29.973 | 16.615 |
| O | 11.77  | 26.697 | 27.758 |
| H | 12.281 | 27.238 | 28.36  |
| H | 10.88  | 27.045 | 27.821 |

|   |        |        |        |
|---|--------|--------|--------|
| O | 16.841 | 21.428 | 19.485 |
| H | 17.664 | 21.307 | 19.96  |
| H | 16.432 | 20.562 | 19.491 |
| O | 18.218 | 30.917 | 13.635 |
| H | 19.02  | 31.44  | 13.633 |
| H | 17.531 | 31.533 | 13.89  |
| O | 19.683 | 31.273 | 19.221 |
| H | 20.549 | 31.558 | 19.514 |
| H | 19.263 | 30.935 | 20.012 |
| O | 16.147 | 31.036 | 24.68  |
| H | 15.607 | 30.323 | 25.021 |
| H | 16.072 | 31.728 | 25.337 |
| O | 15.518 | 30.124 | 19.132 |
| H | 15.1   | 30.613 | 19.841 |
| H | 16.381 | 29.894 | 19.476 |
| O | 14.1   | 25.544 | 16.465 |
| H | 14.254 | 26.406 | 16.851 |
| H | 13.352 | 25.195 | 16.95  |
| O | 22.678 | 29.625 | 16.507 |
| H | 23.225 | 30.276 | 16.946 |
| H | 22.985 | 28.785 | 16.848 |
| O | 19.204 | 28.066 | 13.227 |
| H | 19.892 | 28.232 | 12.582 |
| H | 18.729 | 28.895 | 13.289 |
| O | 15.718 | 25.165 | 8.299  |
| H | 16.584 | 24.811 | 8.1    |
| H | 15.678 | 25.178 | 9.255  |
| O | 11.17  | 29.151 | 21.291 |
| H | 12.004 | 29.4   | 21.69  |
| H | 11.226 | 28.201 | 21.193 |
| O | 33.37  | 25.639 | 19.299 |
| H | 32.733 | 25.983 | 19.926 |
| H | 34.157 | 26.164 | 19.446 |
| O | 16.267 | 28.198 | 26.672 |
| H | 16.151 | 27.332 | 26.281 |
| H | 15.448 | 28.656 | 26.485 |
| O | 25.075 | 27.949 | 24.701 |
| H | 25.929 | 27.518 | 24.754 |
| H | 24.626 | 27.503 | 23.984 |
| O | 19.353 | 30.071 | 21.619 |
| H | 18.914 | 29.509 | 22.257 |
| H | 20.133 | 30.387 | 22.075 |
| O | 10.628 | 21.988 | 23.73  |
| H | 11.119 | 22.808 | 23.678 |
| H | 10.072 | 21.992 | 22.95  |
| O | 27.111 | 28.882 | 20.581 |
| H | 26.437 | 28.446 | 20.06  |

|   |        |        |        |
|---|--------|--------|--------|
| H | 27.194 | 29.751 | 20.189 |
| O | 24.864 | 28.34  | 27.769 |
| H | 24.911 | 28.056 | 26.856 |
| H | 24.993 | 27.538 | 28.276 |
| O | 26.818 | 26.169 | 11.249 |
| H | 27.134 | 26.174 | 12.152 |
| H | 25.937 | 26.54  | 11.3   |
| O | 26.258 | 25.458 | 17.288 |
| H | 27.206 | 25.532 | 17.392 |
| H | 26.119 | 25.466 | 16.341 |
| O | 14.62  | 29.462 | 12.835 |
| H | 14.506 | 29.02  | 13.676 |
| H | 15.562 | 29.427 | 12.671 |
| O | 11.198 | 28.961 | 25.719 |
| H | 10.812 | 28.193 | 26.141 |
| H | 10.637 | 29.124 | 24.961 |
| O | 17.29  | 27.644 | 20.529 |
| H | 17.728 | 27.128 | 21.207 |
| H | 16.63  | 27.052 | 20.168 |
| O | 20.817 | 29.522 | 11.52  |
| H | 21.724 | 29.388 | 11.794 |
| H | 20.821 | 30.376 | 11.088 |
| O | 20.925 | 27.96  | 8.713  |
| H | 20.995 | 28.704 | 9.311  |
| H | 20.462 | 28.309 | 7.951  |
| O | 16.955 | 15.331 | 32.7   |
| H | 16.55  | 15.37  | 33.566 |
| H | 16.453 | 15.951 | 32.171 |
| O | 21.44  | 22.08  | 30.761 |
| H | 22.317 | 22.004 | 30.384 |
| H | 21.373 | 21.338 | 31.362 |
| O | 12.756 | 16.479 | 24.912 |
| H | 13.482 | 16.7   | 25.496 |
| H | 12.671 | 17.239 | 24.337 |
| O | 16.042 | 14.118 | 27.054 |
| H | 15.404 | 14.757 | 26.737 |
| H | 16.134 | 14.312 | 27.986 |
| O | 4.385  | 14.355 | 22.132 |
| H | 4.404  | 14.303 | 21.176 |
| H | 5.022  | 15.036 | 22.348 |
| O | 16.029 | 25.333 | 26.761 |
| H | 16.951 | 25.579 | 26.679 |
| H | 15.939 | 25.037 | 27.667 |
| O | 11.873 | 17.622 | 29.258 |
| H | 11.424 | 17.928 | 28.469 |
| H | 12.778 | 17.482 | 28.979 |
| O | 23.729 | 23.294 | 23.224 |



|   |        |        |        |
|---|--------|--------|--------|
| H | 24.058 | 24.189 | 23.134 |
| H | 24.062 | 22.838 | 22.451 |
| O | 19.392 | 20.508 | 33.059 |
| H | 19.681 | 19.86  | 32.416 |
| H | 20.188 | 20.746 | 33.533 |
| O | 33.331 | 12.525 | 26.742 |
| H | 33.384 | 13.096 | 27.509 |
| H | 32.414 | 12.57  | 26.472 |
| O | 14.938 | 14.961 | 34.797 |
| H | 14.775 | 14.024 | 34.687 |
| H | 14.259 | 15.252 | 35.406 |
| O | 10.502 | 21.215 | 32.977 |
| H | 10.478 | 21.586 | 33.858 |
| H | 11.075 | 21.803 | 32.484 |
| O | 21.786 | 24.636 | 30.15  |
| H | 22.028 | 23.795 | 30.538 |
| H | 22.583 | 24.936 | 29.713 |
| O | 15.76  | 9.473  | 30.393 |
| H | 14.834 | 9.234  | 30.432 |
| H | 15.937 | 9.596  | 29.461 |
| O | 19.217 | 23.957 | 31.127 |
| H | 20.148 | 24.159 | 31.03  |
| H | 19.154 | 23.022 | 30.934 |
| O | 19.267 | 10.349 | 29.028 |
| H | 18.369 | 10.678 | 28.982 |
| H | 19.722 | 10.973 | 29.593 |
| O | 16.387 | 20.326 | 30.157 |
| H | 16.358 | 20.609 | 31.071 |
| H | 17.16  | 20.758 | 29.797 |
| O | 21.717 | 19.25  | 31.351 |
| H | 22.221 | 19.013 | 30.573 |
| H | 21.531 | 18.414 | 31.779 |
| O | 21.773 | 16.589 | 28.207 |
| H | 21.965 | 16.894 | 27.32  |
| H | 22.616 | 16.28  | 28.541 |
| O | 30.768 | 14.722 | 29.267 |
| H | 30.961 | 15.589 | 28.908 |
| H | 31.615 | 14.279 | 29.291 |
| O | 19.91  | 17.365 | 34.391 |
| H | 19.781 | 16.988 | 35.261 |
| H | 19.934 | 18.31  | 34.541 |
| O | 7.472  | 18.784 | 29.415 |
| H | 6.896  | 18.049 | 29.205 |
| H | 7.735  | 18.631 | 30.322 |
| O | 13.558 | 25.662 | 30.212 |
| H | 13.476 | 26.59  | 30.432 |
| H | 13.048 | 25.56  | 29.408 |

|   |        |        |        |
|---|--------|--------|--------|
| O | 19.811 | 22.199 | 24.228 |
| H | 20.647 | 22.43  | 24.631 |
| H | 19.187 | 22.198 | 24.953 |
| O | 27.923 | 8.658  | 28.649 |
| H | 28.431 | 9.442  | 28.441 |
| H | 28.362 | 7.955  | 28.171 |
| O | 22.458 | 17.144 | 25.325 |
| H | 22.54  | 16.622 | 24.528 |
| H | 23.125 | 17.825 | 25.235 |
| O | 12.872 | 12.642 | 31.282 |
| H | 13.08  | 12.215 | 32.114 |
| H | 12.789 | 13.569 | 31.504 |
| O | 28.235 | 15.187 | 27.246 |
| H | 28.641 | 15.958 | 27.641 |
| H | 28.357 | 15.307 | 26.304 |
| O | 21.999 | 28.447 | 22.887 |
| H | 21.135 | 28.619 | 23.261 |
| H | 22.272 | 29.286 | 22.517 |
| O | 11.937 | 14.865 | 28.668 |
| H | 11.386 | 14.863 | 27.885 |
| H | 11.646 | 15.632 | 29.162 |
| O | 20.122 | 14.863 | 32.256 |
| H | 19.815 | 15.711 | 32.578 |
| H | 20.11  | 14.296 | 33.026 |
| O | 12.206 | 23.256 | 31.77  |
| H | 13.122 | 23.494 | 31.626 |
| H | 11.757 | 23.541 | 30.974 |
| O | 10.115 | 20.572 | 28.846 |
| H | 9.487  | 20.234 | 29.485 |
| H | 10.295 | 19.828 | 28.271 |
| O | 21.743 | 21.82  | 27.681 |
| H | 22.61  | 21.852 | 27.276 |
| H | 21.234 | 21.243 | 27.112 |
| O | 14.851 | 23.762 | 24.915 |
| H | 15.36  | 24.056 | 24.159 |
| H | 15.232 | 24.231 | 25.657 |
| O | 17.235 | 13.891 | 29.551 |
| H | 16.489 | 13.548 | 30.042 |
| H | 17.465 | 14.704 | 30     |
| O | 12.496 | 18.392 | 23.093 |
| H | 12.583 | 19.222 | 23.562 |
| H | 12.739 | 18.6   | 22.191 |
| O | 13.511 | 21.266 | 28.659 |
| H | 12.659 | 21.659 | 28.471 |
| H | 13.674 | 21.478 | 29.579 |
| O | 19.58  | 12.408 | 31.127 |
| H | 19.432 | 13.285 | 31.481 |

|   |        |        |        |
|---|--------|--------|--------|
| H | 19.842 | 11.885 | 31.885 |
| O | 9.923  | 17.477 | 27.295 |
| H | 9.111  | 17.051 | 27.568 |
| H | 10.363 | 16.827 | 26.747 |
| O | 18.347 | 8.686  | 25.953 |
| H | 18.62  | 9.597  | 26.065 |
| H | 18.068 | 8.41   | 26.826 |
| O | 15.273 | 18.259 | 34.139 |
| H | 14.368 | 18.555 | 34.047 |
| H | 15.707 | 18.562 | 33.342 |
| O | 25.163 | 21.625 | 31.806 |
| H | 25.502 | 21.439 | 30.93  |
| H | 24.998 | 20.762 | 32.187 |
| O | 24.758 | 23.037 | 28.812 |
| H | 24.497 | 23.059 | 27.891 |
| H | 25.629 | 22.639 | 28.804 |
| O | 31.006 | 24.973 | 26.133 |
| H | 31.048 | 25.098 | 27.081 |
| H | 31.194 | 24.044 | 26.005 |
| O | 21.843 | 14.029 | 29.919 |
| H | 21.364 | 13.201 | 29.9   |
| H | 21.47  | 14.505 | 30.661 |
| O | 3.691  | 13.415 | 24.653 |
| H | 3.879  | 13.535 | 23.722 |
| H | 4.249  | 12.684 | 24.918 |
| O | 10.883 | 14.903 | 26.04  |
| H | 10.417 | 14.692 | 25.231 |
| H | 11.719 | 15.265 | 25.746 |
| O | 27.401 | 26.591 | 25.41  |
| H | 27.41  | 26.62  | 26.367 |
| H | 28.087 | 27.203 | 25.145 |
| O | 21.655 | 11.816 | 28.049 |
| H | 22.116 | 11.342 | 28.742 |
| H | 22.219 | 11.724 | 27.281 |
| O | 9.156  | 25.736 | 30.419 |
| H | 9.733  | 25.049 | 30.755 |
| H | 9.06   | 26.347 | 31.149 |
| O | 13.533 | 12.733 | 28.119 |
| H | 14.455 | 12.946 | 27.977 |
| H | 13.182 | 13.489 | 28.589 |
| O | 23.935 | 13.857 | 27.143 |
| H | 23.268 | 14.002 | 27.814 |
| H | 24.462 | 14.655 | 27.153 |
| O | 18.692 | 26.056 | 26.329 |
| H | 19.128 | 26.796 | 26.752 |
| H | 19.378 | 25.394 | 26.239 |
| O | 11.851 | 12.855 | 23.124 |

|   |        |        |        |
|---|--------|--------|--------|
| H | 11.658 | 13.712 | 22.744 |
| H | 12.698 | 12.969 | 23.555 |
| O | 15.626 | 12.123 | 30.89  |
| H | 15.657 | 11.216 | 30.585 |
| H | 14.766 | 12.438 | 30.611 |
| O | 10.014 | 20.59  | 26.179 |
| H | 9.549  | 21.152 | 26.799 |
| H | 10.185 | 21.155 | 25.426 |
| O | 19.394 | 15.833 | 16.886 |
| H | 20.083 | 16.332 | 17.326 |
| H | 18.978 | 15.332 | 17.587 |
| O | 20.054 | 26.94  | 20.282 |
| H | 19.373 | 27.3   | 19.714 |
| H | 19.839 | 26.01  | 20.354 |
| O | 16.945 | 12.623 | 24.602 |
| H | 16.984 | 12.276 | 23.71  |
| H | 17.651 | 12.172 | 25.065 |
| O | 22.958 | 16.088 | 5.736  |
| H | 22.339 | 16.502 | 6.337  |
| H | 23.819 | 16.312 | 6.088  |
| O | 23.37  | 10.671 | 13.931 |
| H | 22.71  | 9.994  | 14.082 |
| H | 22.878 | 11.41  | 13.574 |
| O | 15.044 | 14.239 | 14.849 |
| H | 14.889 | 15.184 | 14.839 |
| H | 15.803 | 14.127 | 15.421 |
| O | 17.468 | 17.185 | 14.984 |
| H | 17.92  | 16.542 | 15.53  |
| H | 16.609 | 17.286 | 15.394 |
| O | 14.403 | 16.848 | 15.969 |
| H | 13.948 | 17.67  | 16.154 |
| H | 14.21  | 16.292 | 16.723 |
| O | 15.941 | 22.78  | 28.839 |
| H | 15.971 | 22.046 | 29.452 |
| H | 16.454 | 23.468 | 29.264 |
| O | 9.19   | 26.368 | 11.58  |
| H | 9.137  | 26.834 | 10.746 |
| H | 8.366  | 26.573 | 12.023 |
| O | 25.461 | 27.257 | 19.145 |
| H | 24.532 | 27.278 | 19.375 |
| H | 25.525 | 26.581 | 18.47  |
| O | 25.425 | 11.559 | 27.11  |
| H | 24.902 | 12.36  | 27.139 |
| H | 25.715 | 11.43  | 28.013 |
| O | 18.419 | 5.694  | 17.961 |
| H | 17.904 | 5.222  | 17.306 |
| H | 19.284 | 5.287  | 17.924 |

|   |        |        |        |
|---|--------|--------|--------|
| O | 25.06  | 21.993 | 21.145 |
| H | 25.996 | 22.109 | 20.98  |
| H | 24.83  | 21.197 | 20.666 |
| O | 29.628 | 17.598 | 10.714 |
| H | 29.801 | 18.391 | 11.222 |
| H | 30.054 | 16.899 | 11.21  |
| O | 17.57  | 13.249 | 16.234 |
| H | 18.437 | 13.654 | 16.246 |
| H | 17.195 | 13.459 | 17.089 |
| O | 15.28  | 15.817 | 12.454 |
| H | 14.861 | 15.48  | 11.662 |
| H | 15.297 | 15.07  | 13.052 |
| O | 21.627 | 12.663 | 13.231 |
| H | 21.25  | 12.924 | 14.071 |
| H | 21.47  | 13.412 | 12.655 |
| O | 17.755 | 15.73  | 25.649 |
| H | 18.607 | 15.4   | 25.932 |
| H | 17.126 | 15.092 | 25.988 |
| O | 18.731 | 22.555 | 17.426 |
| H | 17.984 | 22.738 | 16.856 |
| H | 18.404 | 22.718 | 18.31  |
| O | 16.305 | 13.653 | 9.176  |
| H | 15.683 | 13.996 | 9.818  |
| H | 15.787 | 13.539 | 8.379  |
| O | 14.368 | 13.467 | 21.096 |
| H | 14.669 | 14.215 | 21.613 |
| H | 14.139 | 13.841 | 20.245 |
| O | 22.909 | 23.677 | 16.692 |
| H | 22.302 | 24.379 | 16.929 |
| H | 22.394 | 22.875 | 16.78  |
| O | 22.343 | 26.264 | 13.759 |
| H | 21.624 | 26.451 | 13.154 |
| H | 22.138 | 26.778 | 14.54  |
| O | 28.285 | 4.477  | 19.359 |
| H | 29.064 | 4.957  | 19.64  |
| H | 28.469 | 3.566  | 19.587 |
| O | 8.898  | 18.427 | 15.597 |
| H | 9.56   | 19.004 | 15.215 |
| H | 8.079  | 18.693 | 15.179 |
| O | 11.489 | 21.897 | 12.634 |
| H | 12.403 | 21.614 | 12.659 |
| H | 11.531 | 22.85  | 12.711 |
| O | 21.335 | 19.709 | 23.292 |
| H | 20.775 | 20.422 | 23.599 |
| H | 20.725 | 19.007 | 23.064 |
| O | 19.946 | 29.885 | 16.909 |
| H | 20.864 | 29.831 | 16.642 |

|   |        |        |        |
|---|--------|--------|--------|
| H | 19.97  | 30.307 | 17.768 |
| O | 13.262 | 26.321 | 13.77  |
| H | 13.79  | 27.004 | 14.183 |
| H | 13.563 | 25.508 | 14.176 |
| O | 25.524 | 21.135 | 12.809 |
| H | 25.102 | 20.588 | 12.146 |
| H | 25.298 | 22.031 | 12.559 |
| O | 27.382 | 25.171 | 14.397 |
| H | 27.956 | 24.443 | 14.635 |
| H | 26.543 | 24.758 | 14.194 |
| O | 19.293 | 13.239 | 27.628 |
| H | 18.729 | 13.63  | 28.295 |
| H | 20.128 | 13.096 | 28.074 |
| O | 11.386 | 16.902 | 19.667 |
| H | 10.675 | 17.357 | 19.216 |
| H | 11.773 | 17.567 | 20.236 |
| O | 14.224 | 10.457 | 25.473 |
| H | 13.675 | 10.076 | 24.788 |
| H | 13.607 | 10.898 | 26.057 |
| O | 27.741 | 16.05  | 24.581 |
| H | 26.823 | 16.164 | 24.335 |
| H | 28.205 | 16.731 | 24.094 |
| O | 15.712 | 18.646 | 24.882 |
| H | 16.604 | 18.442 | 24.598 |
| H | 15.821 | 19.333 | 25.539 |
| O | 18.883 | 6.511  | 14.197 |
| H | 19.033 | 5.952  | 14.959 |
| H | 19.752 | 6.635  | 13.816 |
| O | 24.681 | 20.073 | 14.961 |
| H | 23.846 | 20.534 | 15.05  |
| H | 25.116 | 20.506 | 14.227 |
| O | 18.261 | 22.005 | 26.323 |
| H | 17.341 | 22.148 | 26.101 |
| H | 18.241 | 21.652 | 27.212 |
| O | 15.03  | 16.584 | 26.547 |
| H | 15.496 | 17.223 | 26.006 |
| H | 14.873 | 17.039 | 27.374 |
| O | 19.257 | 18.968 | 27.196 |
| H | 19.113 | 18.833 | 26.259 |
| H | 19.164 | 18.097 | 27.581 |
| O | 13.242 | 15.061 | 18.782 |
| H | 12.414 | 14.723 | 18.441 |
| H | 13.003 | 15.872 | 19.231 |
| O | 18.487 | 11.278 | 13.645 |
| H | 18.181 | 11.915 | 13     |
| H | 18.748 | 11.807 | 14.399 |
| O | 16.854 | 8.504  | 19.286 |

|   |        |        |        |
|---|--------|--------|--------|
| H | 17.512 | 8.476  | 19.98  |
| H | 16.016 | 8.472  | 19.748 |
| O | 14.272 | 18.25  | 13.393 |
| H | 14.767 | 17.467 | 13.154 |
| H | 13.532 | 18.261 | 12.786 |
| O | 21.4   | 11.534 | 24.354 |
| H | 22.108 | 10.945 | 24.616 |
| H | 21.833 | 12.373 | 24.195 |
| O | 14.464 | 18.51  | 28.583 |
| H | 13.694 | 19.017 | 28.328 |
| H | 14.964 | 19.1   | 29.147 |
| O | 13.277 | 19.405 | 15.875 |
| H | 13.618 | 19.224 | 14.999 |
| H | 13.859 | 20.078 | 16.225 |
| O | 15.771 | 14.127 | 18.118 |
| H | 16.154 | 14.342 | 18.969 |
| H | 14.88  | 14.475 | 18.163 |
| O | 14.25  | 22.462 | 13.34  |
| H | 14.147 | 22.425 | 12.389 |
| H | 15.019 | 23.016 | 13.476 |
| O | 16.827 | 11.302 | 10.527 |
| H | 17.434 | 11.501 | 11.239 |
| H | 16.743 | 12.126 | 10.047 |
| O | 14.742 | 28.238 | 15.334 |
| H | 14.438 | 28.843 | 16.011 |
| H | 15.695 | 28.235 | 15.425 |
| O | 22.076 | 9.108  | 15.841 |
| H | 22.533 | 9.041  | 16.68  |
| H | 21.422 | 9.793  | 15.978 |
| O | 24.223 | 17.423 | 14.731 |
| H | 23.553 | 17.297 | 15.402 |
| H | 24.473 | 18.344 | 14.812 |
| O | 6.718  | 15.743 | 20.562 |
| H | 6.749  | 16.374 | 21.281 |
| H | 7.498  | 15.202 | 20.685 |
| O | 10.755 | 23.099 | 29.429 |
| H | 10.654 | 22.161 | 29.268 |
| H | 10.382 | 23.516 | 28.652 |
| O | 27.991 | 19.053 | 24.709 |
| H | 27.83  | 19.759 | 24.083 |
| H | 27.119 | 18.729 | 24.934 |
| O | 26.205 | 13.685 | 6.223  |
| H | 26.475 | 12.817 | 6.523  |
| H | 25.384 | 13.533 | 5.756  |
| O | 25.571 | 16.088 | 26.879 |
| H | 25.369 | 16.91  | 26.432 |
| H | 26.523 | 16.094 | 26.975 |

|   |        |        |        |
|---|--------|--------|--------|
| O | 24.569 | 19.77  | 10.825 |
| H | 23.627 | 19.909 | 10.921 |
| H | 24.689 | 18.832 | 10.973 |
| O | 21.065 | 25.826 | 17.148 |
| H | 21.323 | 26.57  | 17.693 |
| H | 20.241 | 26.1   | 16.744 |
| O | 7.429  | 14.828 | 14.904 |
| H | 7.2    | 14.177 | 14.241 |
| H | 8.385  | 14.873 | 14.875 |
| O | 19.662 | 19.241 | 14.753 |
| H | 19.241 | 19.991 | 14.332 |
| H | 18.958 | 18.601 | 14.862 |
| O | 25.015 | 25.077 | 25.389 |
| H | 24.909 | 25.396 | 26.285 |
| H | 25.954 | 25.154 | 25.217 |
| O | 15.648 | 10.447 | 15.077 |
| H | 15.635 | 9.705  | 15.681 |
| H | 16.538 | 10.456 | 14.726 |
| O | 24.255 | 22.071 | 26.165 |
| H | 25.154 | 22.104 | 25.836 |
| H | 23.727 | 22.436 | 25.455 |
| O | 19.663 | 25.389 | 12.536 |
| H | 19.505 | 26.136 | 13.115 |
| H | 19.449 | 25.714 | 11.662 |
| O | 22.74  | 15.438 | 22.947 |
| H | 23.517 | 15.344 | 22.397 |
| H | 22.671 | 14.602 | 23.409 |
| O | 14.287 | 21.072 | 10.769 |
| H | 15.146 | 20.653 | 10.73  |
| H | 14.247 | 21.611 | 9.979  |
| O | 9.796  | 9.679  | 25.912 |
| H | 9.944  | 10.403 | 26.52  |
| H | 8.844  | 9.632  | 25.823 |
| O | 22.303 | 16.254 | 11.052 |
| H | 23.249 | 16.2   | 11.189 |
| H | 21.924 | 15.914 | 11.862 |
| O | 16.339 | 23.922 | 16.134 |
| H | 16.628 | 24.337 | 15.322 |
| H | 15.499 | 24.337 | 16.33  |
| O | 21.65  | 19.95  | 11.103 |
| H | 21.479 | 19.292 | 11.777 |
| H | 21.353 | 20.773 | 11.491 |
| O | 16.783 | 20.269 | 14.756 |
| H | 16.29  | 20.474 | 15.55  |
| H | 16.349 | 19.496 | 14.397 |
| O | 20.451 | 13.255 | 15.701 |
| H | 20.65  | 13.928 | 16.352 |



|   |        |        |        |
|---|--------|--------|--------|
| H | 20.389 | 12.444 | 16.206 |
| O | 24.977 | 13.027 | 11.868 |
| H | 25.252 | 12.3   | 12.426 |
| H | 24.624 | 13.676 | 12.477 |
| O | 18.644 | 13.758 | 12.463 |
| H | 18.538 | 14.559 | 12.976 |
| H | 18.746 | 14.063 | 11.561 |
| O | 16.501 | 15.419 | 20.562 |
| H | 16.026 | 15.502 | 21.388 |
| H | 16.832 | 16.3   | 20.386 |
| O | 27.658 | 10.103 | 21.625 |
| H | 28.235 | 10.275 | 20.881 |
| H | 27.592 | 10.945 | 22.077 |
| O | 25.356 | 22.448 | 17.363 |
| H | 25.957 | 23.193 | 17.351 |
| H | 24.51  | 22.82  | 17.113 |
| O | 24.968 | 14.88  | 21.457 |
| H | 25.063 | 13.947 | 21.268 |
| H | 24.656 | 15.261 | 20.636 |
| O | 16.794 | 19.565 | 10.797 |
| H | 16.91  | 18.774 | 11.323 |
| H | 17.268 | 20.244 | 11.278 |
| O | 9.428  | 18.475 | 18.235 |
| H | 8.496  | 18.538 | 18.445 |
| H | 9.453  | 18.386 | 17.282 |
| O | 30.636 | 22.114 | 13.548 |
| H | 31.534 | 22.436 | 13.618 |
| H | 30.729 | 21.169 | 13.423 |
| O | 21.547 | 23.357 | 21.133 |
| H | 22.255 | 23.657 | 20.563 |
| H | 21.957 | 23.253 | 21.991 |
| O | 12.513 | 25.53  | 9.66   |
| H | 12.422 | 24.893 | 8.952  |
| H | 11.833 | 26.181 | 9.486  |
| O | 15.709 | 27.732 | 22.834 |
| H | 16.206 | 28.194 | 22.158 |
| H | 16.316 | 27.07  | 23.166 |
| O | 17.379 | 29.438 | 15.92  |
| H | 18.303 | 29.489 | 16.168 |
| H | 17.258 | 30.157 | 15.3   |
| O | 16.011 | 17.212 | 31.043 |
| H | 15.317 | 17.042 | 30.406 |
| H | 16.788 | 17.379 | 30.51  |
| O | 24.396 | 23.347 | 12.071 |
| H | 24.119 | 24.109 | 11.562 |
| H | 23.629 | 23.12  | 12.597 |
| O | 9.908  | 17.41  | 23.452 |

|   |        |        |        |
|---|--------|--------|--------|
| H | 10.793 | 17.759 | 23.344 |
| H | 9.347  | 18.185 | 23.484 |
| O | 14.078 | 22.542 | 8.549  |
| H | 14.538 | 23.355 | 8.338  |
| H | 13.169 | 22.71  | 8.303  |
| O | 15.072 | 21.246 | 16.941 |
| H | 15.033 | 21.149 | 17.893 |
| H | 15.506 | 22.088 | 16.804 |
| O | 17.755 | 17.448 | 12.332 |
| H | 18.247 | 17.413 | 13.152 |
| H | 16.93  | 17.005 | 12.528 |
| O | 16.921 | 23.022 | 22.968 |
| H | 16.499 | 23.164 | 22.121 |
| H | 17.771 | 22.638 | 22.751 |
| O | 8.472  | 19.84  | 23.852 |
| H | 8.277  | 20.697 | 23.474 |
| H | 8.95   | 20.037 | 24.658 |
| O | 17.786 | 21.334 | 12.658 |
| H | 17.278 | 22.145 | 12.626 |
| H | 17.52  | 20.917 | 13.477 |
| O | 11.65  | 21.466 | 19.131 |
| H | 12.012 | 20.691 | 18.703 |
| H | 11.042 | 21.833 | 18.489 |
| O | 19.878 | 12.178 | 8.33   |
| H | 20.645 | 12.75  | 8.341  |
| H | 19.732 | 11.955 | 9.249  |
| O | 25.465 | 16.898 | 23.713 |
| H | 25.257 | 16.216 | 23.076 |
| H | 24.796 | 17.568 | 23.574 |
| O | 25.204 | 18.77  | 26.226 |
| H | 24.96  | 19.407 | 25.555 |
| H | 24.691 | 19.022 | 26.994 |
| O | 12.147 | 6.908  | 26.549 |
| H | 12.898 | 6.828  | 25.962 |
| H | 11.651 | 7.651  | 26.203 |
| O | 11.774 | 9.792  | 11.863 |
| H | 12.611 | 10.227 | 12.022 |
| H | 11.921 | 9.271  | 11.074 |
| O | 17.469 | 25.759 | 23.544 |
| H | 17.553 | 24.829 | 23.332 |
| H | 18.056 | 25.889 | 24.288 |
| O | 14.927 | 15.308 | 22.925 |
| H | 14.754 | 14.585 | 23.528 |
| H | 14.552 | 16.075 | 23.358 |
| O | 27.736 | 17.219 | 19.315 |
| H | 27.382 | 17.243 | 18.426 |
| H | 27.865 | 16.288 | 19.496 |

|   |        |        |        |
|---|--------|--------|--------|
| O | 16.482 | 30.519 | 22.119 |
| H | 17.414 | 30.43  | 21.92  |
| H | 16.46  | 30.887 | 23.003 |
| O | 14.371 | 13.497 | 24.665 |
| H | 13.969 | 12.678 | 24.955 |
| H | 15.312 | 13.331 | 24.71  |
| O | 19.094 | 11.327 | 25.729 |
| H | 19.08  | 11.87  | 26.518 |
| H | 19.942 | 11.511 | 25.326 |
| O | 20.33  | 2.519  | 14.449 |
| H | 20.702 | 2.649  | 13.576 |
| H | 21.004 | 2.843  | 15.046 |
| O | 10.493 | 14.62  | 6.71   |
| H | 11.024 | 14.708 | 7.502  |
| H | 10.017 | 13.799 | 6.831  |
| O | 18.687 | 29.294 | 24.049 |
| H | 19.196 | 29.293 | 24.859 |
| H | 17.776 | 29.344 | 24.338 |
| O | 20.257 | 22.752 | 12.421 |
| H | 19.441 | 22.302 | 12.202 |
| H | 19.999 | 23.665 | 12.552 |
| O | 16.52  | 23.984 | 12.622 |
| H | 16.125 | 24.529 | 11.941 |
| H | 17.05  | 24.593 | 13.138 |
| O | 9.36   | 26.219 | 24.548 |
| H | 9.741  | 25.846 | 25.343 |
| H | 8.518  | 25.773 | 24.454 |
| O | 21.31  | 21.552 | 17.118 |
| H | 20.371 | 21.738 | 17.095 |
| H | 21.367 | 20.637 | 17.392 |
| O | 26.912 | 22.294 | 24.819 |
| H | 27.582 | 22.928 | 25.074 |
| H | 27.283 | 21.845 | 24.059 |
| O | 26.128 | 20.794 | 8.596  |
| H | 25.623 | 21.575 | 8.823  |
| H | 25.934 | 20.171 | 9.297  |
| O | 28.098 | 12.063 | 12.714 |
| H | 28.49  | 12.491 | 11.953 |
| H | 27.572 | 11.353 | 12.345 |
| O | 20.386 | 16.855 | 22.874 |
| H | 19.688 | 16.2   | 22.901 |
| H | 21.169 | 16.361 | 22.63  |
| O | 20.219 | 17.398 | 9.613  |
| H | 21.062 | 17.358 | 10.063 |
| H | 19.753 | 16.615 | 9.906  |
| O | 16.815 | 12.151 | 21.77  |
| H | 15.968 | 12.574 | 21.625 |

|   |        |        |        |
|---|--------|--------|--------|
| H | 17.118 | 11.915 | 20.894 |
| O | 23.346 | 13.405 | 24.485 |
| H | 23.579 | 13.548 | 25.403 |
| H | 24.171 | 13.162 | 24.065 |
| O | 13.765 | 10.058 | 8.48   |
| H | 13.369 | 9.811  | 7.644  |
| H | 13.745 | 9.255  | 9.001  |
| O | 14.298 | 10.813 | 12.508 |
| H | 14.985 | 10.8   | 11.841 |
| H | 14.71  | 10.432 | 13.283 |
| O | 9.276  | 9.6    | 12.286 |
| H | 9.228  | 10.347 | 12.883 |
| H | 10.196 | 9.561  | 12.025 |
| O | 27.973 | 19.014 | 7.91   |
| H | 27.322 | 19.715 | 7.966  |
| H | 27.618 | 18.314 | 8.458  |
| O | 8.414  | 13.815 | 22.047 |
| H | 8.693  | 12.915 | 21.88  |
| H | 9.23   | 14.309 | 22.122 |
| O | 27.268 | 12.771 | 15.442 |
| H | 26.34  | 12.54  | 15.396 |
| H | 27.646 | 12.406 | 14.643 |
| O | 20.594 | 10.31  | 22.154 |
| H | 21.357 | 9.739  | 22.06  |
| H | 20.755 | 10.793 | 22.965 |
| O | 29.545 | 13.664 | 8.748  |
| H | 28.742 | 13.678 | 9.268  |
| H | 30.139 | 13.095 | 9.239  |
| O | 23.224 | 6.175  | 17.644 |
| H | 23.777 | 6.187  | 16.863 |
| H | 22.995 | 7.093  | 17.788 |
| O | 19.409 | 24.33  | 19.467 |
| H | 20.177 | 23.984 | 19.922 |
| H | 19.523 | 24.05  | 18.559 |
| O | 7.605  | 10.179 | 21.005 |
| H | 8.263  | 10.849 | 21.186 |
| H | 7.961  | 9.687  | 20.265 |
| O | 15.15  | 23.322 | 20.352 |
| H | 15.685 | 22.545 | 20.191 |
| H | 14.359 | 22.986 | 20.773 |
| O | 22.52  | 22.091 | 13.856 |
| H | 21.633 | 22.215 | 13.52  |
| H | 22.443 | 22.242 | 14.798 |
| O | 18.279 | 15.065 | 22.961 |
| H | 17.794 | 15.164 | 23.781 |
| H | 17.829 | 14.357 | 22.501 |
| O | 15.927 | 8.033  | 16.597 |

|   |        |        |        |
|---|--------|--------|--------|
| H | 15.802 | 7.089  | 16.502 |
| H | 16.391 | 8.13   | 17.429 |
| O | 28.018 | 22.874 | 19.665 |
| H | 27.946 | 21.926 | 19.553 |
| H | 28.904 | 23.008 | 20.002 |
| O | 17.628 | 25.957 | 14.337 |
| H | 17.759 | 26.13  | 15.27  |
| H | 18.137 | 26.635 | 13.894 |
| O | 18.063 | 3.425  | 16.417 |
| H | 18.713 | 3.289  | 15.728 |
| H | 17.221 | 3.282  | 15.984 |
| O | 18.629 | 18.047 | 24.495 |
| H | 19.425 | 17.798 | 24.027 |
| H | 18.252 | 17.217 | 24.786 |
| O | 23.616 | 28.7   | 12.625 |
| H | 23.669 | 27.819 | 12.996 |
| H | 24.246 | 29.212 | 13.133 |
| O | 19.091 | 21.702 | 21.61  |
| H | 19.893 | 21.913 | 21.132 |
| H | 19.386 | 21.511 | 22.501 |
| O | 25.261 | 30.427 | 14.657 |
| H | 26.169 | 30.713 | 14.566 |
| H | 25.015 | 30.69  | 15.544 |
| O | 23.917 | 24.227 | 20.046 |
| H | 24.379 | 23.451 | 20.363 |
| H | 24.368 | 24.46  | 19.235 |
| O | 21.055 | 15.483 | 13.922 |
| H | 20.52  | 14.923 | 14.484 |
| H | 21.497 | 16.077 | 14.529 |
| O | 24.222 | 10.565 | 18.262 |
| H | 24.868 | 9.939  | 18.589 |
| H | 24.551 | 10.82  | 17.4   |
| O | 25.046 | 11.998 | 21.977 |
| H | 25.844 | 12.043 | 22.503 |
| H | 24.907 | 11.062 | 21.832 |
| O | 10.185 | 19.902 | 11.363 |
| H | 10.681 | 20.668 | 11.651 |
| H | 9.446  | 19.854 | 11.969 |
| O | 16.788 | 7.395  | 9.922  |
| H | 17.393 | 8.119  | 9.764  |
| H | 16.281 | 7.668  | 10.686 |
| O | 20.387 | 10.75  | 11.029 |
| H | 20.686 | 11.237 | 11.797 |
| H | 21.093 | 10.129 | 10.849 |
| O | 18.426 | 9.698  | 9.126  |
| H | 19.206 | 9.307  | 9.522  |
| H | 18.13  | 10.342 | 9.769  |

|   |        |        |        |
|---|--------|--------|--------|
| O | 18.182 | 24.209 | 8.114  |
| H | 18.945 | 24.632 | 8.509  |
| H | 18.506 | 23.359 | 7.818  |
| O | 21.753 | 14.324 | 8.707  |
| H | 21.991 | 14.935 | 9.404  |
| H | 22.481 | 14.373 | 8.087  |
| O | 22.599 | 19.857 | 8.309  |
| H | 22.736 | 20.754 | 8.005  |
| H | 22.329 | 19.952 | 9.222  |
| O | 14.199 | 6.789  | 25.103 |
| H | 14.274 | 7.493  | 24.458 |
| H | 15.096 | 6.639  | 25.399 |
| O | 26.291 | 30.243 | 23.073 |
| H | 26.462 | 29.894 | 22.198 |
| H | 25.381 | 30.539 | 23.04  |
| O | 9.459  | 16.99  | 9.082  |
| H | 8.605  | 16.558 | 9.061  |
| H | 9.255  | 17.925 | 9.078  |
| O | 20.014 | 14.534 | 5.595  |
| H | 19.448 | 15.158 | 6.05   |
| H | 20.885 | 14.929 | 5.634  |
| O | 19.101 | 14.65  | 9.853  |
| H | 18.31  | 14.349 | 9.407  |
| H | 19.813 | 14.432 | 9.253  |
| O | 19.734 | 25.768 | 9.831  |
| H | 20.332 | 25.069 | 9.568  |
| H | 20.129 | 26.567 | 9.481  |
| O | 15.175 | 18.744 | 8.697  |
| H | 15.753 | 18.867 | 9.45   |
| H | 15.604 | 18.066 | 8.174  |
| O | 20.98  | 18.384 | 6.461  |
| H | 20.751 | 19.234 | 6.083  |
| H | 21.596 | 18.593 | 7.162  |
| O | 24.633 | 24.894 | 15.023 |
| H | 24.047 | 24.343 | 15.542 |
| H | 24.047 | 25.426 | 14.484 |
| O | 27.14  | 14.032 | 10.141 |
| H | 26.858 | 14.497 | 10.93  |
| H | 26.466 | 13.368 | 10.001 |
| O | 26.89  | 17.52  | 9.823  |
| H | 26.255 | 17.894 | 10.434 |
| H | 27.67  | 17.362 | 10.355 |
| O | 19.228 | 16.616 | 7.143  |
| H | 20.039 | 16.978 | 6.788  |
| H | 19.092 | 17.09  | 7.963  |
| O | 27.373 | 16.141 | 6.634  |
| H | 27.004 | 15.284 | 6.848  |

|   |        |        |        |
|---|--------|--------|--------|
| H | 27.278 | 16.65  | 7.439  |
| O | 20.518 | 9.114  | 6.35   |
| H | 19.891 | 9.73   | 5.971  |
| H | 20.06  | 8.737  | 7.101  |
| O | 12.036 | 12.55  | 8.6    |
| H | 12.391 | 11.692 | 8.369  |
| H | 12.764 | 13.156 | 8.461  |
| O | 8.073  | 19.293 | 12.916 |
| H | 7.339  | 19.82  | 13.231 |
| H | 7.831  | 18.392 | 13.131 |
| O | 28.786 | 10.546 | 7.084  |
| H | 29.066 | 11.286 | 6.545  |
| H | 27.829 | 10.58  | 7.058  |
| O | 17.516 | 20.477 | 6.169  |
| H | 16.589 | 20.714 | 6.18   |
| H | 17.614 | 19.86  | 6.895  |
| O | 18.504 | 19.38  | 8.678  |
| H | 17.977 | 19.426 | 9.475  |
| H | 19.214 | 18.775 | 8.895  |
| O | 24.323 | 25.463 | 9.965  |
| H | 24.664 | 25.721 | 9.109  |
| H | 23.615 | 26.083 | 10.138 |
| O | 7.78   | 29.723 | 15.323 |
| H | 8.247  | 30.226 | 15.99  |
| H | 8.283  | 28.913 | 15.237 |
| O | 8.864  | 19.929 | 8.576  |
| H | 8.631  | 19.973 | 9.504  |
| H | 9.638  | 20.488 | 8.497  |
| O | 24.171 | 22.829 | 8.747  |
| H | 23.279 | 23.17  | 8.821  |
| H | 24.714 | 23.479 | 9.192  |
| O | 21.244 | 23.78  | 8.287  |
| H | 21.294 | 24.432 | 7.588  |
| H | 20.811 | 23.028 | 7.883  |
| O | 14.608 | 18.205 | 4.848  |
| H | 14.401 | 17.63  | 4.112  |
| H | 13.755 | 18.488 | 5.179  |
| O | 19.924 | 21.603 | 7.612  |
| H | 20.045 | 21.457 | 6.674  |
| H | 19.489 | 20.809 | 7.924  |
| O | 14.314 | 14.558 | 7.198  |
| H | 15.157 | 14.999 | 7.097  |
| H | 13.665 | 15.252 | 7.083  |
| O | 17.02  | 28.357 | 11.062 |
| H | 17.879 | 28.356 | 11.485 |
| H | 17.155 | 28.842 | 10.248 |
| O | 12.076 | 19.619 | 5.305  |

|   |        |        |        |
|---|--------|--------|--------|
| H | 11.173 | 19.305 | 5.315  |
| H | 12.279 | 19.797 | 6.223  |
| O | 24.135 | 9.013  | 7.504  |
| H | 24.017 | 8.16   | 7.084  |
| H | 24.243 | 8.81   | 8.433  |
| O | 20.533 | 7.791  | 9.143  |
| H | 21.058 | 7.108  | 8.727  |
| H | 20.768 | 7.744  | 10.07  |
| O | 14.962 | 26.232 | 10.749 |
| H | 15.29  | 27.119 | 10.896 |
| H | 14.02  | 26.344 | 10.621 |
| O | 23.608 | 12.845 | 5.112  |
| H | 23.199 | 12.399 | 5.853  |
| H | 23.459 | 12.261 | 4.369  |
| O | 12.377 | 19.602 | 8.232  |
| H | 13.164 | 19.429 | 8.749  |
| H | 12.059 | 20.445 | 8.555  |
| O | 23.166 | 10.212 | 29.633 |
| H | 23.016 | 10.028 | 30.561 |
| H | 23.982 | 9.755  | 29.427 |
| O | 21.656 | 8.536  | 27.858 |
| H | 20.705 | 8.617  | 27.786 |
| H | 21.897 | 9.152  | 28.549 |
| O | 20.104 | 6.795  | 25.015 |
| H | 20.145 | 6.764  | 24.059 |
| H | 19.476 | 7.492  | 25.204 |
| O | 21.823 | 4.798  | 23.765 |
| H | 22.025 | 4.211  | 23.036 |
| H | 21.345 | 5.523  | 23.363 |
| O | 19.611 | 5.653  | 27.727 |
| H | 19.863 | 6.067  | 26.902 |
| H | 18.656 | 5.606  | 27.69  |
| O | 16.545 | 12.364 | 33.541 |
| H | 16.979 | 13.211 | 33.433 |
| H | 16.058 | 12.239 | 32.727 |
| O | 22.582 | 8.671  | 21.629 |
| H | 22.293 | 7.763  | 21.724 |
| H | 23.441 | 8.695  | 22.051 |
| O | 19.672 | 12.13  | 20.083 |
| H | 18.909 | 11.736 | 19.661 |
| H | 19.929 | 11.496 | 20.753 |
| O | 25.745 | 8.456  | 19.464 |
| H | 26.1   | 7.602  | 19.219 |
| H | 25.767 | 8.46   | 20.421 |
| O | 14.942 | 7.964  | 12.04  |
| H | 14.351 | 7.747  | 12.761 |
| H | 15.77  | 8.182  | 12.468 |



|   |        |        |        |
|---|--------|--------|--------|
| O | 25.469 | 4.58   | 12.551 |
| H | 24.865 | 4.327  | 13.25  |
| H | 26.339 | 4.488  | 12.942 |
| O | 12.903 | 8.209  | 16.179 |
| H | 13.744 | 7.755  | 16.229 |
| H | 12.679 | 8.196  | 15.249 |
| O | 20.681 | 4.849  | 17.283 |
| H | 21.085 | 3.984  | 17.214 |
| H | 21.419 | 5.454  | 17.358 |
| O | 14.96  | 5.607  | 16.675 |
| H | 15.424 | 5.202  | 17.408 |
| H | 14.977 | 4.944  | 15.985 |
| O | 24.929 | 3.111  | 21.795 |
| H | 24.917 | 2.992  | 22.745 |
| H | 25.167 | 4.03   | 21.672 |
| O | 24.821 | 6.199  | 15.508 |
| H | 25.311 | 5.466  | 15.136 |
| H | 25.487 | 6.86   | 15.697 |
| O | 20.735 | 10.817 | 17.859 |
| H | 21.253 | 10.076 | 18.174 |
| H | 20.533 | 11.319 | 18.649 |
| O | 15.859 | 5.475  | 21.218 |
| H | 15.249 | 5.051  | 20.614 |
| H | 15.499 | 6.353  | 21.344 |
| O | 20.771 | 5.262  | 12.215 |
| H | 21.477 | 5.904  | 12.298 |
| H | 21.215 | 4.414  | 12.234 |
| O | 26.792 | 11.473 | 29.652 |
| H | 26.509 | 10.976 | 30.419 |
| H | 27.726 | 11.276 | 29.57  |
| O | 16.933 | 4.598  | 13.488 |
| H | 17.476 | 5.37   | 13.65  |
| H | 16.31  | 4.881  | 12.818 |
| O | 18.595 | 4.874  | 20.615 |
| H | 17.733 | 4.934  | 21.028 |
| H | 18.43  | 5.061  | 19.69  |
| O | 21.641 | 5.335  | 8.322  |
| H | 20.956 | 4.874  | 7.837  |
| H | 21.963 | 4.69   | 8.952  |
| O | 22.777 | 7.188  | 13.749 |
| H | 23.243 | 6.495  | 14.218 |
| H | 22.565 | 7.833  | 14.424 |
| O | 16.939 | 5.794  | 26.44  |
| H | 16.577 | 4.923  | 26.601 |
| H | 17.047 | 5.837  | 25.49  |
| O | 21.614 | 1.321  | 20.076 |
| H | 20.826 | 1.184  | 19.551 |

|   |        |        |        |
|---|--------|--------|--------|
| H | 21.514 | 2.205  | 20.431 |
| O | 22.325 | 8.632  | 18.507 |
| H | 23.08  | 9.21   | 18.608 |
| H | 21.889 | 8.655  | 19.359 |
| O | 15.022 | 8.21   | 21.62  |
| H | 15.405 | 8.711  | 22.34  |
| H | 14.179 | 8.633  | 21.456 |
| O | 23.142 | 5.674  | 20.23  |
| H | 23.876 | 6.209  | 20.531 |
| H | 23.16  | 5.756  | 19.277 |
| O | 21.637 | 2.564  | 12.113 |
| H | 21.388 | 1.645  | 12.019 |
| H | 21.886 | 2.836  | 11.23  |
| O | 17.461 | 8.619  | 13.175 |
| H | 17.91  | 8.001  | 13.751 |
| H | 17.992 | 9.414  | 13.216 |
| O | 31.544 | 8.965  | 24.418 |
| H | 31.384 | 9.851  | 24.091 |
| H | 32.103 | 8.562  | 23.753 |
| O | 16.549 | 9.056  | 23.942 |
| H | 17.251 | 8.693  | 24.482 |
| H | 16.269 | 9.842  | 24.409 |
| O | 16.938 | 5.183  | 23.867 |
| H | 16.594 | 5.433  | 23.009 |
| H | 16.63  | 4.286  | 23.996 |
| O | 19.849 | 6.507  | 22.403 |
| H | 19.182 | 7.037  | 21.965 |
| H | 19.777 | 5.645  | 21.994 |
| O | 16.233 | 7.417  | 28.481 |
| H | 15.46  | 6.937  | 28.779 |
| H | 16.505 | 6.962  | 27.684 |
| O | 14.159 | 3.839  | 19.885 |
| H | 13.926 | 3.704  | 18.966 |
| H | 13.77  | 3.094  | 20.343 |
| O | 13.207 | 10.901 | 16.462 |
| H | 13.966 | 10.894 | 15.878 |
| H | 12.945 | 9.983  | 16.526 |
| O | 23.406 | 10.236 | 25.781 |
| H | 23.432 | 9.436  | 26.307 |
| H | 24.233 | 10.677 | 25.974 |
| O | 26.761 | 5.183  | 10.151 |
| H | 26.488 | 5.243  | 11.066 |
| H | 26.044 | 5.582  | 9.659  |
| O | 22.438 | 2.8    | 16.266 |
| H | 22.092 | 1.912  | 16.356 |
| H | 23.145 | 2.849  | 16.909 |
| O | 24.848 | 9.495  | 10.383 |

|   |        |        |        |
|---|--------|--------|--------|
| H | 24.994 | 10.398 | 10.1   |
| H | 25.694 | 9.213  | 10.73  |
| O | 18.294 | 8.698  | 21.634 |
| H | 19.002 | 9.278  | 21.914 |
| H | 17.596 | 8.848  | 22.271 |
| O | 30.401 | 5.99   | 20.707 |
| H | 31.337 | 6.172  | 20.791 |
| H | 30.087 | 5.927  | 21.609 |
| O | 27.262 | 11.494 | 24.43  |
| H | 26.724 | 11.713 | 25.191 |
| H | 27.418 | 10.553 | 24.51  |
| O | 16.553 | 11.125 | 27.716 |
| H | 16.055 | 10.917 | 26.925 |
| H | 16.725 | 12.064 | 27.651 |
| O | 18.636 | 14.472 | 19.061 |
| H | 19.069 | 13.674 | 19.365 |
| H | 18.005 | 14.68  | 19.751 |
| O | 26.295 | 5.941  | 18.23  |
| H | 25.431 | 5.529  | 18.237 |
| H | 26.908 | 5.213  | 18.332 |
| O | 17.242 | 11.293 | 18.992 |
| H | 17.164 | 10.418 | 18.613 |
| H | 16.411 | 11.72  | 18.781 |
| O | 12.88  | 6.997  | 13.606 |
| H | 11.954 | 7.209  | 13.484 |
| H | 12.911 | 6.041  | 13.588 |
| O | 19.435 | 3.691  | 24.066 |
| H | 18.86  | 4.443  | 24.203 |
| H | 20.319 | 4.041  | 24.182 |
| O | 16.393 | 10.343 | 7.185  |
| H | 15.564 | 10.221 | 7.648  |
| H | 17.052 | 9.971  | 7.771  |
| O | 15.596 | 3.233  | 15.249 |
| H | 15.054 | 2.598  | 14.781 |
| H | 15.998 | 3.76   | 14.559 |
| O | 11.883 | 15.87  | 9.605  |
| H | 12.188 | 16.476 | 10.28  |
| H | 11.015 | 16.195 | 9.365  |
| O | 24.408 | 5.797  | 8.197  |
| H | 24.597 | 4.874  | 8.027  |
| H | 23.453 | 5.857  | 8.155  |
| O | 24.303 | 15.474 | 8.769  |
| H | 24.325 | 16.277 | 8.249  |
| H | 25.183 | 15.403 | 9.137  |
| O | 10.345 | 24.772 | 26.483 |
| H | 10.794 | 24.263 | 25.808 |
| H | 11.047 | 25.231 | 26.943 |

|   |        |        |        |
|---|--------|--------|--------|
| O | 6.743  | 23.957 | 24.422 |
| H | 7.142  | 23.753 | 25.268 |
| H | 7.408  | 23.714 | 23.778 |
| O | 8.702  | 28.755 | 24.255 |
| H | 8.471  | 28.172 | 23.532 |
| H | 8.819  | 28.173 | 25.006 |
| O | 4.606  | 20.151 | 25.387 |
| H | 5.257  | 20.411 | 26.038 |
| H | 4.765  | 19.218 | 25.248 |
| O | 5.998  | 26.836 | 27.348 |
| H | 5.629  | 26.154 | 27.91  |
| H | 6.217  | 26.383 | 26.534 |
| O | 11.233 | 24.062 | 21.261 |
| H | 10.486 | 23.476 | 21.134 |
| H | 11.931 | 23.493 | 21.584 |
| O | 9.48   | 27.556 | 15.717 |
| H | 10.067 | 26.861 | 15.418 |
| H | 9.744  | 27.719 | 16.622 |
| O | 11.536 | 26.417 | 22.465 |
| H | 10.698 | 26.726 | 22.807 |
| H | 11.308 | 25.667 | 21.915 |
| O | 7.942  | 27.289 | 21.811 |
| H | 7.106  | 26.846 | 21.668 |
| H | 7.809  | 28.17  | 21.461 |
| O | 8.065  | 29.45  | 19.317 |
| H | 8.059  | 30.407 | 19.313 |
| H | 7.166  | 29.204 | 19.098 |
| O | 12.427 | 28.253 | 11.606 |
| H | 12.447 | 27.435 | 12.103 |
| H | 13.199 | 28.734 | 11.905 |
| O | 7.57   | 23.724 | 19.557 |
| H | 6.861  | 23.086 | 19.479 |
| H | 7.503  | 24.255 | 18.763 |
| O | 14.853 | 24.985 | 32.463 |
| H | 15.796 | 24.817 | 32.475 |
| H | 14.649 | 25.137 | 31.54  |
| O | 5.186  | 26.955 | 22.474 |
| H | 4.794  | 27.671 | 21.974 |
| H | 5.111  | 27.232 | 23.387 |
| O | 9.281  | 21.829 | 21.265 |
| H | 8.698  | 22.45  | 20.829 |
| H | 9.496  | 21.187 | 20.588 |
| O | 10.03  | 27.47  | 19.351 |
| H | 9.481  | 28.238 | 19.507 |
| H | 9.7    | 26.811 | 19.962 |
| O | 13.439 | 29.575 | 22.515 |
| H | 14.23  | 29.153 | 22.849 |

|   |        |        |        |
|---|--------|--------|--------|
| H | 13.406 | 30.417 | 22.97  |
| O | 9.389  | 9.913  | 29.44  |
| H | 10.315 | 10.145 | 29.37  |
| H | 8.94   | 10.751 | 29.546 |
| O | 7.242  | 22.664 | 30.659 |
| H | 7.301  | 21.799 | 31.065 |
| H | 7.797  | 23.222 | 31.204 |
| O | 8.322  | 22.971 | 26.654 |
| H | 7.712  | 23.213 | 27.351 |
| H | 8.996  | 23.651 | 26.679 |
| O | 7.694  | 13.829 | 26.977 |
| H | 6.99   | 13.731 | 26.335 |
| H | 8.345  | 14.375 | 26.537 |
| O | 7.121  | 15.997 | 28.933 |
| H | 6.785  | 15.262 | 28.42  |
| H | 6.596  | 15.99  | 29.733 |
| O | 3.119  | 18.475 | 18.734 |
| H | 3.746  | 17.906 | 18.288 |
| H | 2.54   | 18.786 | 18.038 |
| O | 8.495  | 8.206  | 19.487 |
| H | 9.292  | 8.272  | 18.961 |
| H | 8.139  | 7.343  | 19.276 |
| O | 8.48   | 19.274 | 32.209 |
| H | 7.707  | 19.438 | 32.749 |
| H | 9.123  | 19.915 | 32.51  |
| O | 4.097  | 19.322 | 28.952 |
| H | 4.788  | 19.211 | 28.3   |
| H | 4.032  | 20.269 | 29.074 |
| O | 7.118  | 8.55   | 22.881 |
| H | 7.965  | 8.684  | 23.306 |
| H | 7.173  | 9.058  | 22.072 |
| O | 3.798  | 21.594 | 23.096 |
| H | 3.677  | 20.919 | 22.428 |
| H | 4.474  | 21.241 | 23.674 |
| O | 19.124 | 16.275 | 29.635 |
| H | 19.402 | 15.702 | 30.349 |
| H | 19.934 | 16.501 | 29.179 |
| O | 7.147  | 9.499  | 26.21  |
| H | 6.598  | 8.782  | 25.894 |
| H | 7.238  | 9.336  | 27.149 |
| O | 11.99  | 9.548  | 24.076 |
| H | 11.727 | 10.048 | 23.304 |
| H | 11.218 | 9.557  | 24.642 |
| O | 11.833 | 10.956 | 29.762 |
| H | 12.33  | 11.567 | 30.306 |
| H | 11.999 | 11.243 | 28.865 |
| O | 11.687 | 17.244 | 31.975 |

|   |        |        |        |
|---|--------|--------|--------|
| H | 11.846 | 17.457 | 31.055 |
| H | 10.755 | 17.029 | 32.013 |
| O | 10.627 | 16.069 | 14.79  |
| H | 10.043 | 16.794 | 15.01  |
| H | 11.485 | 16.478 | 14.678 |
| O | 7.258  | 25.223 | 17.33  |
| H | 7.475  | 26.051 | 17.759 |
| H | 6.914  | 25.48  | 16.474 |
| O | 7.461  | 13.033 | 12.694 |
| H | 7.663  | 12.851 | 11.777 |
| H | 7.797  | 12.273 | 13.17  |
| O | 4.969  | 14.157 | 19.343 |
| H | 5.51   | 14.933 | 19.496 |
| H | 5.238  | 13.844 | 18.479 |
| O | 5.269  | 16.773 | 17.728 |
| H | 5.056  | 17.109 | 16.857 |
| H | 5.421  | 15.838 | 17.593 |
| O | 6.669  | 17.421 | 14.285 |
| H | 5.782  | 17.404 | 14.643 |
| H | 7.076  | 16.619 | 14.614 |
| O | 3.784  | 19.597 | 21.196 |
| H | 3.605  | 19.147 | 20.371 |
| H | 3.726  | 18.91  | 21.861 |
| O | 3.905  | 17.383 | 12.472 |
| H | 4.436  | 16.586 | 12.481 |
| H | 4.476  | 18.055 | 12.844 |
| O | 6.793  | 20.993 | 16.992 |
| H | 7.708  | 21.26  | 17.083 |
| H | 6.708  | 20.232 | 17.566 |
| O | 10.889 | 20.232 | 15.06  |
| H | 10.994 | 20.785 | 14.286 |
| H | 11.766 | 20.18  | 15.439 |
| O | 6.589  | 20.397 | 27.023 |
| H | 7.251  | 21.087 | 27.054 |
| H | 6.629  | 19.987 | 27.887 |
| O | 9.581  | 23.657 | 7.735  |
| H | 8.647  | 23.449 | 7.725  |
| H | 9.693  | 24.292 | 7.027  |
| O | 10.311 | 13.591 | 14.341 |
| H | 11.167 | 13.391 | 13.961 |
| H | 10.27  | 14.547 | 14.347 |
| O | 22.708 | 27.764 | 19.976 |
| H | 23.029 | 28.05  | 20.831 |
| H | 21.756 | 27.738 | 20.074 |
| O | 1.962  | 21.501 | 25.597 |
| H | 2.79   | 21.096 | 25.337 |
| H | 1.505  | 20.818 | 26.087 |

|   |        |        |        |
|---|--------|--------|--------|
| O | 6.059  | 26.458 | 15.133 |
| H | 6.193  | 27.093 | 14.43  |
| H | 5.346  | 26.826 | 15.655 |
| O | 2.22   | 19.398 | 16.242 |
| H | 2.93   | 20.007 | 16.038 |
| H | 1.421  | 19.898 | 16.078 |
| O | 15.493 | 21.324 | 26.146 |
| H | 15.28  | 22.159 | 25.728 |
| H | 15.233 | 21.441 | 27.059 |
| O | 4.397  | 14.864 | 26.829 |
| H | 4.099  | 14.296 | 26.118 |
| H | 3.934  | 14.542 | 27.603 |
| O | 4.572  | 17.526 | 26.449 |
| H | 4.46   | 16.583 | 26.567 |
| H | 3.879  | 17.918 | 26.982 |
| O | 9.923  | 11.473 | 21.452 |
| H | 10.413 | 11.212 | 20.673 |
| H | 10.595 | 11.737 | 22.08  |
| O | 9.436  | 21.342 | 17.242 |
| H | 9.867  | 22.169 | 17.025 |
| H | 9.86   | 20.696 | 16.678 |
| O | 6.216  | 20.945 | 14.084 |
| H | 5.983  | 20.699 | 14.979 |
| H | 6.268  | 21.9   | 14.103 |
| O | 12.158 | 18.656 | 26.6   |
| H | 11.225 | 18.793 | 26.439 |
| H | 12.596 | 19.249 | 25.989 |
| O | 10.421 | 24.811 | 14.196 |
| H | 10.087 | 25.32  | 13.456 |
| H | 11.367 | 24.955 | 14.177 |
| O | 13.184 | 21.666 | 21.343 |
| H | 13.397 | 20.762 | 21.574 |
| H | 12.751 | 21.6   | 20.492 |
| O | 4.004  | 23.979 | 24.467 |
| H | 4.953  | 24.109 | 24.476 |
| H | 3.884  | 23.118 | 24.067 |
| O | 16.458 | 16.79  | 6.819  |
| H | 16.051 | 17.121 | 6.019  |
| H | 17.349 | 16.558 | 6.557  |
| O | 8.511  | 15.399 | 24.713 |
| H | 8.957  | 16.163 | 24.349 |
| H | 7.882  | 15.144 | 24.038 |
| O | 8.856  | 11.454 | 17.814 |
| H | 9.752  | 11.453 | 18.151 |
| H | 8.62   | 12.381 | 17.765 |
| O | 11.364 | 11.877 | 18.304 |
| H | 11.246 | 12.788 | 18.033 |

|   |        |        |        |
|---|--------|--------|--------|
| H | 12.181 | 11.607 | 17.884 |
| O | 2.885  | 21.121 | 13.352 |
| H | 3.436  | 21.175 | 14.133 |
| H | 2.753  | 22.032 | 13.088 |
| O | 11.853 | 25.183 | 18.281 |
| H | 11.887 | 24.91  | 19.198 |
| H | 11.671 | 26.122 | 18.318 |
| O | 5.727  | 16.408 | 23.623 |
| H | 4.838  | 16.737 | 23.752 |
| H | 6.176  | 16.598 | 24.447 |
| O | 5.582  | 11.634 | 25.208 |
| H | 5.295  | 11.249 | 24.379 |
| H | 6.379  | 11.152 | 25.432 |
| O | 8.719  | 11.419 | 14.191 |
| H | 8.544  | 10.991 | 15.029 |
| H | 9.495  | 11.956 | 14.354 |
| O | 6.273  | 23.876 | 28.295 |
| H | 5.336  | 24.071 | 28.309 |
| H | 6.473  | 23.596 | 29.188 |
| O | 6.503  | 23.859 | 13.896 |
| H | 7.332  | 23.712 | 14.352 |
| H | 6.243  | 24.744 | 14.152 |
| O | 13.069 | 12.808 | 13.633 |
| H | 13.689 | 12.119 | 13.395 |
| H | 13.468 | 13.241 | 14.388 |
| O | 6.632  | 18.898 | 19.134 |
| H | 6.882  | 18.464 | 19.949 |
| H | 6.162  | 18.226 | 18.64  |
| O | 4.124  | 21.273 | 16.129 |
| H | 3.35   | 21.534 | 16.628 |
| H | 4.86   | 21.629 | 16.627 |
| O | 10.827 | 15.006 | 21.802 |
| H | 11.27  | 15.512 | 21.121 |
| H | 10.502 | 15.664 | 22.417 |
| O | 11.4   | 11.911 | 26.723 |
| H | 12.157 | 12.312 | 27.149 |
| H | 11.041 | 12.605 | 26.17  |
| O | 3.261  | 17.644 | 23.186 |
| H | 2.591  | 17.011 | 22.925 |
| H | 2.892  | 18.08  | 23.954 |
| O | 8.779  | 9.041  | 16.468 |
| H | 9.601  | 8.686  | 16.807 |
| H | 8.641  | 9.844  | 16.97  |
| O | 11.083 | 14.387 | 17.521 |
| H | 10.829 | 15.24  | 17.873 |
| H | 11.042 | 14.498 | 16.572 |
| O | 5.413  | 14.961 | 12.896 |



|   |        |        |        |
|---|--------|--------|--------|
| H | 5.8    | 14.634 | 12.084 |
| H | 6.119  | 15.452 | 13.317 |
| O | 13.664 | 10.862 | 21.141 |
| H | 13.498 | 10.818 | 20.199 |
| H | 13.795 | 11.794 | 21.317 |
| O | 8.069  | 13.676 | 10.149 |
| H | 7.756  | 14.578 | 10.086 |
| H | 8.456  | 13.497 | 9.292  |
| O | 10.412 | 23.596 | 16.652 |
| H | 10.728 | 24.219 | 17.306 |
| H | 10.385 | 24.097 | 15.837 |
| O | 7.234  | 18.164 | 22.144 |
| H | 7.628  | 18.837 | 22.698 |
| H | 6.779  | 17.586 | 22.756 |
| O | 3.627  | 10.43  | 19.518 |
| H | 4.527  | 10.501 | 19.2   |
| H | 3.137  | 11.062 | 18.991 |
| O | 5.534  | 13.837 | 16.786 |
| H | 6.369  | 13.912 | 16.323 |
| H | 4.893  | 13.663 | 16.096 |
| O | 3.976  | 13.497 | 14.707 |
| H | 4.316  | 14.117 | 14.062 |
| H | 3.096  | 13.285 | 14.395 |
| O | 9.675  | 23.694 | 10.775 |
| H | 9.012  | 23.8   | 10.092 |
| H | 9.783  | 24.572 | 11.142 |
| O | 5.391  | 21.911 | 19.72  |
| H | 5.166  | 21.406 | 20.501 |
| H | 5.839  | 21.286 | 19.15  |
| O | 12.569 | 24.472 | 7.065  |
| H | 12.548 | 24.004 | 6.23   |
| H | 12.711 | 25.387 | 6.823  |
| O | 12.741 | 18.302 | 11.121 |
| H | 11.822 | 18.561 | 11.053 |
| H | 13.228 | 19.063 | 10.804 |
| O | 5.821  | 22.106 | 11.546 |
| H | 6.054  | 21.497 | 12.247 |
| H | 5.888  | 22.972 | 11.949 |
| O | 5.855  | 18.556 | 9.479  |
| H | 5.073  | 18.545 | 8.927  |
| H | 5.735  | 19.315 | 10.049 |
| O | 2.897  | 22.367 | 18.607 |
| H | 2.381  | 22.61  | 19.376 |
| H | 3.805  | 22.41  | 18.905 |
| O | 2.558  | 12.333 | 18.335 |
| H | 3.227  | 13.006 | 18.461 |
| H | 1.729  | 12.788 | 18.484 |

|   |        |        |        |
|---|--------|--------|--------|
| O | 8.687  | 16.129 | 12.3   |
| H | 8.632  | 16.325 | 11.364 |
| H | 8.437  | 15.207 | 12.366 |
| O | 10.657 | 7.817  | 17.783 |
| H | 10.612 | 6.874  | 17.626 |
| H | 11.563 | 8.05   | 17.581 |
| O | 4.919  | 11.137 | 22.608 |
| H | 5.588  | 10.882 | 21.972 |
| H | 4.279  | 11.632 | 22.097 |
| O | 14.027 | 13.954 | 10.726 |
| H | 13.286 | 14.48  | 10.426 |
| H | 13.64  | 13.308 | 11.316 |
| O | 4.941  | 10.54  | 15.659 |
| H | 4.883  | 10.595 | 16.613 |
| H | 4.572  | 11.367 | 15.349 |
| O | 6.883  | 16.082 | 9.474  |
| H | 6.474  | 16.936 | 9.614  |
| H | 6.708  | 15.881 | 8.554  |

**Table S18. PYP chromophore + 683 waters**

| <b>Method</b>   | <b>Time(s)</b> | <b>iterations</b> | <b>E(eV)</b> | <b>f</b>   |
|-----------------|----------------|-------------------|--------------|------------|
| <b>CIS</b>      | <b>2118.2</b>  | <b>12</b>         | <b>3.65</b>  | <b>1.6</b> |
| <b>TD-BLYP</b>  | <b>-</b>       | <b>-</b>          | <b>-</b>     | <b>-</b>   |
| <b>TD-B3LYP</b> | <b>958.0</b>   | <b>3</b>          | <b>0.57</b>  | <b>0.0</b> |

|   |        |        |        |
|---|--------|--------|--------|
| C | 22.967 | 16.81  | 19.507 |
| C | 24.27  | 16.774 | 18.931 |
| C | 24.617 | 15.671 | 18.139 |
| C | 23.681 | 14.66  | 17.949 |
| C | 22.419 | 14.608 | 18.558 |
| C | 22.092 | 15.731 | 19.368 |
| S | 22.3   | 18.226 | 20.373 |
| C | 21.107 | 18.737 | 19.24  |
| C | 19.881 | 18.611 | 19.724 |
| O | 21.503 | 18.978 | 18.056 |
| C | 18.678 | 18.857 | 18.895 |
| C | 17.412 | 18.7   | 19.379 |
| C | 16.267 | 18.768 | 18.424 |
| C | 15.007 | 18.753 | 18.949 |
| C | 14.627 | 18.622 | 20.339 |
| C | 15.744 | 18.498 | 21.241 |
| C | 17.075 | 18.511 | 20.793 |
| O | 13.416 | 18.649 | 20.62  |
| H | 25.016 | 17.532 | 19.156 |
| H | 25.561 | 15.727 | 17.603 |
| H | 23.959 | 13.891 | 17.234 |
| H | 21.774 | 13.742 | 18.433 |
| H | 21.138 | 15.665 | 19.885 |
| H | 19.762 | 18.159 | 20.708 |
| H | 18.901 | 19.227 | 17.895 |
| H | 16.528 | 18.974 | 17.391 |
| H | 14.139 | 18.825 | 18.303 |
| H | 15.6   | 18.345 | 22.305 |
| H | 17.886 | 18.502 | 21.514 |
| O | 29.51  | 28.373 | 25.52  |
| H | 29.611 | 29.237 | 25.919 |
| H | 30.004 | 27.785 | 26.093 |
| O | 29.914 | 28.662 | 20.051 |
| H | 28.96  | 28.597 | 20.094 |
| H | 30.203 | 28.55  | 20.956 |
| O | 33.619 | 26.143 | 13.581 |
| H | 34.206 | 26.555 | 14.215 |
| H | 33.074 | 25.557 | 14.105 |
| O | 29.182 | 25.39  | 22.779 |
| H | 29.281 | 25.376 | 23.731 |
| H | 28.342 | 25.825 | 22.632 |

|   |        |        |        |
|---|--------|--------|--------|
| O | 27.666 | 29.01  | 16.826 |
| H | 26.744 | 28.833 | 17.014 |
| H | 28.124 | 28.779 | 17.634 |
| O | 29.551 | 22.926 | 11.032 |
| H | 30.104 | 23.7   | 10.923 |
| H | 29.77  | 22.597 | 11.904 |
| O | 25.88  | 25.718 | 28.046 |
| H | 25.602 | 26.061 | 28.895 |
| H | 25.875 | 24.767 | 28.158 |
| O | 33.894 | 22.795 | 16.377 |
| H | 34.33  | 22.95  | 17.215 |
| H | 33.272 | 22.09  | 16.558 |
| O | 30.112 | 21.211 | 18.047 |
| H | 30.308 | 22.125 | 18.252 |
| H | 29.292 | 21.246 | 17.554 |
| O | 32.027 | 24.623 | 10.821 |
| H | 32.335 | 24.527 | 11.722 |
| H | 32.71  | 24.214 | 10.289 |
| O | 24.075 | 15.499 | 29.422 |
| H | 24.789 | 14.887 | 29.603 |
| H | 23.281 | 15.008 | 29.631 |
| O | 25.931 | 16.537 | 32.89  |
| H | 26.584 | 16.212 | 33.509 |
| H | 25.185 | 15.946 | 32.996 |
| O | 26.423 | 14.107 | 29.296 |
| H | 26.561 | 13.165 | 29.395 |
| H | 26.809 | 14.318 | 28.445 |
| O | 27.383 | 22.332 | 28.542 |
| H | 28.134 | 22.88  | 28.772 |
| H | 27.568 | 21.487 | 28.951 |
| O | 25.825 | 17.56  | 30.061 |
| H | 25.435 | 16.932 | 29.452 |
| H | 25.968 | 17.058 | 30.863 |
| O | 28.391 | 13.11  | 22.223 |
| H | 29.252 | 12.971 | 21.829 |
| H | 28.33  | 12.444 | 22.907 |
| O | 32.048 | 27.128 | 24.603 |
| H | 32.977 | 27.306 | 24.748 |
| H | 31.858 | 26.375 | 25.162 |
| O | 30.871 | 21.739 | 29.017 |
| H | 31.739 | 21.702 | 29.418 |
| H | 30.266 | 21.566 | 29.739 |
| O | 29.874 | 10.396 | 28.124 |
| H | 29.975 | 11.045 | 27.428 |
| H | 30.526 | 9.725  | 27.923 |
| O | 31.475 | 22.004 | 26.329 |
| H | 31.137 | 21.63  | 27.143 |

|   |        |        |        |
|---|--------|--------|--------|
| H | 31.181 | 21.401 | 25.647 |
| O | 29.037 | 17.929 | 31.606 |
| H | 28.779 | 17.008 | 31.567 |
| H | 28.694 | 18.308 | 30.797 |
| O | 34.454 | 8.83   | 23.885 |
| H | 34.391 | 8.547  | 22.973 |
| H | 34.633 | 9.769  | 23.833 |
| O | 31.852 | 17.267 | 28.442 |
| H | 32.534 | 17.817 | 28.058 |
| H | 32.119 | 17.156 | 29.355 |
| O | 29.307 | 17.709 | 27.704 |
| H | 30.224 | 17.766 | 27.973 |
| H | 29.295 | 18.067 | 26.817 |
| O | 33.709 | 17.406 | 9.427  |
| H | 34.618 | 17.29  | 9.703  |
| H | 33.76  | 17.531 | 8.48   |
| O | 24.938 | 16.847 | 11.925 |
| H | 24.601 | 17.235 | 12.732 |
| H | 25.689 | 16.325 | 12.206 |
| O | 32.469 | 14.752 | 21.385 |
| H | 33.348 | 14.759 | 21.766 |
| H | 32.195 | 13.836 | 21.431 |
| O | 30.816 | 19.132 | 13.418 |
| H | 30.974 | 18.346 | 13.94  |
| H | 31.54  | 19.153 | 12.792 |
| O | 30.284 | 15.257 | 11.884 |
| H | 31.234 | 15.279 | 11.994 |
| H | 30.077 | 14.33  | 11.768 |
| O | 36.186 | 20.699 | 18.464 |
| H | 36.55  | 20.393 | 19.295 |
| H | 35.267 | 20.432 | 18.492 |
| O | 32.263 | 11.353 | 17.063 |
| H | 32.41  | 10.514 | 17.499 |
| H | 31.311 | 11.441 | 17.027 |
| O | 33.28  | 18.588 | 15.193 |
| H | 33.815 | 17.822 | 15.401 |
| H | 32.532 | 18.235 | 14.713 |
| O | 33.563 | 9.022  | 21.216 |
| H | 34.106 | 9.499  | 20.588 |
| H | 32.971 | 8.501  | 20.675 |
| O | 26.315 | 12.269 | 19.428 |
| H | 25.586 | 12.142 | 20.035 |
| H | 26.005 | 11.901 | 18.601 |
| O | 24.721 | 18.014 | 7.559  |
| H | 23.933 | 18.514 | 7.772  |
| H | 25.27  | 18.627 | 7.07   |
| O | 29.689 | 10.354 | 19.041 |

|   |        |        |        |
|---|--------|--------|--------|
| H | 30.009 | 9.628  | 18.504 |
| H | 28.925 | 10.684 | 18.568 |
| O | 31.465 | 16.672 | 14.469 |
| H | 32.168 | 16.029 | 14.378 |
| H | 30.721 | 16.168 | 14.799 |
| O | 34.923 | 10.571 | 19.564 |
| H | 35.348 | 10.322 | 18.743 |
| H | 35.619 | 10.977 | 20.08  |
| O | 38.527 | 15.458 | 13.427 |
| H | 37.971 | 14.933 | 14.002 |
| H | 38.738 | 14.874 | 12.699 |
| O | 30.751 | 18.966 | 19.536 |
| H | 30.85  | 19.768 | 19.022 |
| H | 29.824 | 18.742 | 19.454 |
| O | 35.482 | 20.719 | 24.898 |
| H | 35.54  | 21.194 | 24.069 |
| H | 34.566 | 20.446 | 24.954 |
| O | 21.624 | 17.545 | 15.698 |
| H | 21.844 | 17.862 | 16.574 |
| H | 21.068 | 18.23  | 15.328 |
| O | 27.301 | 20.143 | 19.909 |
| H | 26.457 | 20.142 | 19.458 |
| H | 27.68  | 19.287 | 19.713 |
| O | 28.39  | 27.497 | 9.419  |
| H | 28.841 | 28.199 | 9.888  |
| H | 28.061 | 26.921 | 10.11  |
| O | 32.002 | 10.998 | 22.33  |
| H | 32.425 | 10.517 | 21.619 |
| H | 31.574 | 11.737 | 21.899 |
| O | 29.855 | 14.696 | 24.663 |
| H | 29.947 | 14.331 | 23.783 |
| H | 29.069 | 15.241 | 24.615 |
| O | 31.889 | 16.56  | 19.452 |
| H | 32.012 | 16.092 | 20.278 |
| H | 31.432 | 17.364 | 19.699 |
| O | 27.763 | 8.742  | 24.655 |
| H | 27.349 | 7.971  | 25.04  |
| H | 28.329 | 8.392  | 23.967 |
| O | 34.644 | 10.558 | 9.453  |
| H | 35.402 | 10.214 | 8.98   |
| H | 33.93  | 9.961  | 9.231  |
| O | 37.732 | 9.429  | 18.503 |
| H | 38.216 | 9.367  | 19.327 |
| H | 38.329 | 9.07   | 17.847 |
| O | 30.544 | 12.556 | 20.427 |
| H | 30.218 | 11.819 | 19.909 |
| H | 30.792 | 13.214 | 19.777 |

|   |        |        |        |
|---|--------|--------|--------|
| O | 32.612 | 20.608 | 17.136 |
| H | 31.709 | 20.388 | 17.362 |
| H | 32.89  | 19.906 | 16.547 |
| O | 28.345 | 21.116 | 22.423 |
| H | 29.083 | 21.585 | 22.033 |
| H | 27.883 | 20.733 | 21.678 |
| O | 37.856 | 19.551 | 20.509 |
| H | 37.953 | 19.844 | 21.415 |
| H | 38.75  | 19.529 | 20.167 |
| O | 28.626 | 7.578  | 18.14  |
| H | 29.131 | 7.399  | 18.934 |
| H | 27.944 | 6.906  | 18.134 |
| O | 34.025 | 19.389 | 20.825 |
| H | 33.18  | 19.249 | 21.253 |
| H | 33.999 | 18.825 | 20.053 |
| O | 24.737 | 20.209 | 19.019 |
| H | 24.671 | 20.885 | 18.345 |
| H | 23.926 | 19.706 | 18.934 |
| O | 24.407 | 14.872 | 14.057 |
| H | 23.679 | 14.548 | 14.587 |
| H | 24.691 | 15.67  | 14.502 |
| O | 27.84  | 14.376 | 19.85  |
| H | 27.952 | 14.292 | 20.797 |
| H | 27.401 | 13.566 | 19.588 |
| O | 29.304 | 15.125 | 15.496 |
| H | 29.712 | 15.071 | 16.36  |
| H | 28.974 | 14.241 | 15.332 |
| O | 30.935 | 23.768 | 18.813 |
| H | 31.045 | 24.586 | 19.299 |
| H | 31.712 | 23.253 | 19.032 |
| O | 22.565 | 11.422 | 7.263  |
| H | 21.77  | 10.969 | 6.982  |
| H | 23.22  | 10.729 | 7.341  |
| O | 33.966 | 14.561 | 9.506  |
| H | 33.515 | 15.401 | 9.592  |
| H | 34.874 | 14.796 | 9.311  |
| O | 30.88  | 7.56   | 16.768 |
| H | 29.99  | 7.73   | 17.076 |
| H | 30.996 | 6.616  | 16.879 |
| O | 29.02  | 27.364 | 13.686 |
| H | 29.65  | 27.404 | 14.405 |
| H | 28.385 | 26.702 | 13.96  |
| O | 33.543 | 13.762 | 29.261 |
| H | 33.839 | 14.591 | 29.636 |
| H | 33.78  | 13.104 | 29.915 |
| O | 30.268 | 23.047 | 21.979 |
| H | 31.187 | 23.245 | 21.797 |

|   |        |        |        |
|---|--------|--------|--------|
| H | 29.889 | 23.888 | 22.238 |
| O | 27.648 | 21.192 | 16.796 |
| H | 27.35  | 20.499 | 16.206 |
| H | 26.861 | 21.705 | 16.979 |
| O | 29.094 | 23.158 | 15.712 |
| H | 28.684 | 22.32  | 15.928 |
| H | 29.846 | 22.923 | 15.168 |
| O | 34.864 | 20.878 | 14.109 |
| H | 35.24  | 20.289 | 13.454 |
| H | 34.281 | 20.321 | 14.625 |
| O | 33.093 | 26.646 | 22.107 |
| H | 32.438 | 26.688 | 22.803 |
| H | 33.395 | 25.738 | 22.117 |
| O | 35.958 | 10.673 | 13.915 |
| H | 35.175 | 10.32  | 13.493 |
| H | 35.815 | 10.525 | 14.85  |
| O | 32.982 | 14.146 | 13.03  |
| H | 33.495 | 13.501 | 12.543 |
| H | 33.138 | 13.931 | 13.95  |
| O | 29.29  | 12.914 | 5.866  |
| H | 28.755 | 13.501 | 5.332  |
| H | 29.356 | 13.355 | 6.713  |
| O | 27.587 | 22.533 | 6.576  |
| H | 27.384 | 22.656 | 7.503  |
| H | 26.773 | 22.205 | 6.193  |
| O | 35.239 | 24.226 | 22.752 |
| H | 35.057 | 23.301 | 22.584 |
| H | 35.71  | 24.522 | 21.974 |
| O | 35.225 | 21.368 | 9.799  |
| H | 34.727 | 22.182 | 9.874  |
| H | 34.904 | 20.965 | 8.992  |
| O | 24.198 | 19.84  | 23.687 |
| H | 24.475 | 20.696 | 23.361 |
| H | 23.265 | 19.795 | 23.477 |
| O | 27.776 | 19.346 | 29.523 |
| H | 28.367 | 18.91  | 28.909 |
| H | 27.057 | 18.725 | 29.643 |
| O | 31.049 | 20.49  | 23.466 |
| H | 31.305 | 20.855 | 22.619 |
| H | 30.106 | 20.348 | 23.391 |
| O | 36.167 | 24.994 | 20.402 |
| H | 36.008 | 24.584 | 19.552 |
| H | 36.629 | 25.806 | 20.193 |
| O | 33.02  | 19.355 | 24.959 |
| H | 32.359 | 19.651 | 24.333 |
| H | 32.922 | 18.403 | 24.978 |
| O | 35.863 | 19.669 | 11.703 |



|   |        |        |        |
|---|--------|--------|--------|
| H | 35.851 | 20.058 | 10.828 |
| H | 36.775 | 19.412 | 11.839 |
| O | 34.337 | 17.381 | 18.699 |
| H | 33.413 | 17.138 | 18.745 |
| H | 34.589 | 17.193 | 17.794 |
| O | 37.085 | 11.712 | 11.01  |
| H | 37.46  | 11.144 | 11.684 |
| H | 36.145 | 11.709 | 11.19  |
| O | 23.676 | 30.073 | 25.75  |
| H | 23.953 | 29.785 | 26.619 |
| H | 24.338 | 29.716 | 25.157 |
| O | 36.349 | 14.37  | 16.428 |
| H | 35.776 | 13.647 | 16.683 |
| H | 36.874 | 14.547 | 17.209 |
| O | 30.684 | 26.111 | 20.225 |
| H | 30.14  | 25.942 | 20.994 |
| H | 30.563 | 27.043 | 20.045 |
| O | 28.875 | 25.274 | 17.405 |
| H | 29.024 | 24.584 | 16.759 |
| H | 28.96  | 24.832 | 18.25  |
| O | 27.561 | 17.119 | 16.412 |
| H | 27.549 | 17.874 | 15.824 |
| H | 28.209 | 16.527 | 16.028 |
| O | 28.503 | 15.262 | 30.777 |
| H | 29.239 | 14.89  | 30.291 |
| H | 27.726 | 14.937 | 30.321 |
| O | 25.055 | 10.896 | 15.923 |
| H | 24.361 | 10.877 | 15.264 |
| H | 25.56  | 10.099 | 15.762 |
| O | 27.663 | 15.508 | 12.777 |
| H | 28.527 | 15.453 | 12.369 |
| H | 27.845 | 15.681 | 13.701 |
| O | 26.642 | 8.919  | 16.155 |
| H | 27.111 | 8.832  | 15.325 |
| H | 27.2   | 8.476  | 16.794 |
| O | 30.043 | 28.447 | 22.688 |
| H | 30.94  | 28.47  | 23.023 |
| H | 29.544 | 28     | 23.371 |
| O | 32.886 | 23.254 | 20.961 |
| H | 33.701 | 22.752 | 20.958 |
| H | 33.126 | 24.103 | 20.589 |
| O | 30.396 | 12.661 | 26.533 |
| H | 29.905 | 13.14  | 27.202 |
| H | 30.326 | 13.206 | 25.749 |
| O | 33.891 | 19.05  | 27.854 |
| H | 33.348 | 19.395 | 27.144 |
| H | 34.755 | 19.431 | 27.701 |

|   |        |        |        |
|---|--------|--------|--------|
| O | 30.413 | 27.058 | 16.275 |
| H | 29.895 | 26.477 | 16.832 |
| H | 31.257 | 26.616 | 16.186 |
| O | 22.286 | 8.889  | 11.272 |
| H | 23.098 | 9.247  | 10.913 |
| H | 22.562 | 8.394  | 12.043 |
| O | 34.969 | 16.574 | 15.88  |
| H | 35.407 | 15.772 | 16.167 |
| H | 35.513 | 16.901 | 15.163 |
| O | 26.164 | 11.202 | 7.345  |
| H | 25.545 | 10.472 | 7.333  |
| H | 25.8   | 11.815 | 7.984  |
| O | 34.181 | 9.003  | 12.582 |
| H | 33.626 | 8.682  | 13.292 |
| H | 34.185 | 8.293  | 11.941 |
| O | 32.535 | 25.399 | 16.466 |
| H | 32.791 | 25.655 | 17.352 |
| H | 33.049 | 24.612 | 16.286 |
| O | 29.654 | 20.42  | 6.361  |
| H | 29.741 | 21.306 | 6.711  |
| H | 29.071 | 19.975 | 6.976  |
| O | 27.272 | 23.704 | 9.485  |
| H | 26.778 | 24.292 | 10.057 |
| H | 28.073 | 23.512 | 9.972  |
| O | 33.233 | 22.995 | 13.617 |
| H | 33.86  | 22.392 | 13.218 |
| H | 33.294 | 22.817 | 14.555 |
| O | 33.064 | 19.005 | 11.754 |
| H | 33.956 | 19.326 | 11.886 |
| H | 33.051 | 18.7   | 10.847 |
| O | 30.605 | 17.651 | 8.116  |
| H | 29.808 | 18.112 | 7.853  |
| H | 30.494 | 17.497 | 9.054  |
| O | 33.099 | 13.381 | 7.205  |
| H | 33.436 | 13.551 | 8.085  |
| H | 32.489 | 14.099 | 7.04   |
| O | 31.29  | 15.336 | 7.075  |
| H | 31.237 | 16.239 | 7.387  |
| H | 30.501 | 14.916 | 7.417  |
| O | 28.183 | 20.556 | 11.69  |
| H | 27.261 | 20.81  | 11.729 |
| H | 28.556 | 21.113 | 11.007 |
| O | 28.184 | 19.383 | 14.719 |
| H | 27.476 | 19.592 | 14.11  |
| H | 28.984 | 19.585 | 14.233 |
| O | 24.872 | 12.144 | 9.43   |
| H | 24.826 | 12.666 | 10.231 |

|   |        |        |        |
|---|--------|--------|--------|
| H | 23.958 | 11.996 | 9.188  |
| O | 29.221 | 6.522  | 10.379 |
| H | 28.456 | 5.947  | 10.342 |
| H | 29.57  | 6.513  | 9.487  |
| O | 33.971 | 12.512 | 11.025 |
| H | 34.129 | 13.342 | 10.575 |
| H | 34.285 | 11.845 | 10.414 |
| O | 24.271 | 2.462  | 24.324 |
| H | 24.276 | 2.433  | 25.281 |
| H | 23.367 | 2.68   | 24.096 |
| O | 33.118 | 5.384  | 21.004 |
| H | 33.837 | 5.702  | 20.458 |
| H | 33.437 | 5.483  | 21.901 |
| O | 34.115 | 11.559 | 24.22  |
| H | 33.339 | 11.165 | 23.821 |
| H | 33.861 | 11.723 | 25.128 |
| O | 29.064 | 5.922  | 23.31  |
| H | 29.919 | 5.734  | 23.696 |
| H | 28.435 | 5.683  | 23.992 |
| O | 27.828 | 5.596  | 25.887 |
| H | 28.47  | 5.873  | 26.541 |
| H | 27.619 | 4.693  | 26.125 |
| O | 26.832 | 5.189  | 21.622 |
| H | 27.252 | 5.047  | 20.773 |
| H | 27.56  | 5.309  | 22.232 |
| O | 27.915 | 9.266  | 11.271 |
| H | 28.66  | 9.642  | 10.801 |
| H | 28.008 | 8.321  | 11.15  |
| O | 29.43  | 4.772  | 14.03  |
| H | 30.115 | 5.18   | 14.559 |
| H | 29.462 | 5.24   | 13.195 |
| O | 31.206 | 3.357  | 19.326 |
| H | 31.592 | 3.95   | 19.971 |
| H | 31.079 | 2.536  | 19.801 |
| O | 34.216 | 13.143 | 17.637 |
| H | 33.781 | 13.513 | 18.405 |
| H | 33.591 | 12.503 | 17.294 |
| O | 31.702 | 10.129 | 12.535 |
| H | 31.309 | 9.286  | 12.76  |
| H | 32.645 | 9.98   | 12.605 |
| O | 24.574 | 1.164  | 20.131 |
| H | 23.643 | 0.949  | 20.082 |
| H | 24.638 | 1.789  | 20.853 |
| O | 26.913 | 4.285  | 15.371 |
| H | 26.952 | 3.337  | 15.496 |
| H | 27.829 | 4.556  | 15.306 |
| O | 33.035 | 8.455  | 8.69   |

|   |        |        |        |
|---|--------|--------|--------|
| H | 32.114 | 8.259  | 8.861  |
| H | 33.169 | 8.202  | 7.777  |
| O | 24.191 | 6.078  | 28.866 |
| H | 23.464 | 5.96   | 29.478 |
| H | 23.769 | 6.211  | 28.017 |
| O | 34.781 | 6.16   | 16.103 |
| H | 35.49  | 6.193  | 16.745 |
| H | 34.378 | 5.302  | 16.235 |
| O | 30.626 | 7.601  | 12.479 |
| H | 30.147 | 7.318  | 11.699 |
| H | 31.486 | 7.19   | 12.393 |
| O | 32.572 | 8.073  | 14.925 |
| H | 33.368 | 7.745  | 15.343 |
| H | 31.863 | 7.787  | 15.501 |
| O | 27.036 | 1.61   | 16.375 |
| H | 27.747 | 1.122  | 16.791 |
| H | 27.079 | 1.356  | 15.453 |
| O | 29.913 | 6.883  | 27.251 |
| H | 30.44  | 6.318  | 27.816 |
| H | 30.516 | 7.572  | 26.973 |
| O | 32.539 | 7.536  | 19.134 |
| H | 32.199 | 7.545  | 18.239 |
| H | 33.388 | 7.099  | 19.063 |
| O | 32.493 | 5.52   | 11.477 |
| H | 33.429 | 5.702  | 11.563 |
| H | 32.308 | 5.65   | 10.547 |
| O | 25.355 | 8.517  | 22.306 |
| H | 25.206 | 7.892  | 23.016 |
| H | 26.306 | 8.621  | 22.275 |
| O | 31.904 | 8.888  | 27.088 |
| H | 31.792 | 8.912  | 26.138 |
| H | 32.853 | 8.878  | 27.217 |
| O | 22.716 | 6.274  | 26.162 |
| H | 22.311 | 6.96   | 26.692 |
| H | 22.078 | 6.099  | 25.47  |
| O | 35.106 | 6.298  | 19.48  |
| H | 35.449 | 5.405  | 19.525 |
| H | 35.801 | 6.84   | 19.854 |
| O | 29.441 | 10.867 | 16.12  |
| H | 29.416 | 10.227 | 15.408 |
| H | 28.616 | 11.345 | 16.04  |
| O | 31.122 | 12.532 | 11.065 |
| H | 31.196 | 11.965 | 11.832 |
| H | 32.015 | 12.84  | 10.907 |
| O | 28.552 | 8.795  | 13.93  |
| H | 29.499 | 8.672  | 13.861 |
| H | 28.268 | 8.976  | 13.034 |

|   |        |        |        |
|---|--------|--------|--------|
| O | 29.73  | 10.361 | 9.699  |
| H | 29.491 | 10.671 | 8.826  |
| H | 30.535 | 10.834 | 9.91   |
| O | 30.307 | 8.048  | 7.832  |
| H | 29.872 | 7.646  | 7.079  |
| H | 29.927 | 8.925  | 7.887  |
| O | 22.492 | 8.265  | 4.963  |
| H | 21.699 | 8.599  | 5.382  |
| H | 22.78  | 8.978  | 4.393  |
| O | 15.325 | 23.619 | 35.24  |
| H | 15.641 | 23.96  | 34.403 |
| H | 15.405 | 22.669 | 35.156 |
| O | 9.173  | 27.776 | 28.296 |
| H | 8.972  | 27.205 | 29.038 |
| H | 8.339  | 28.194 | 28.083 |
| O | 26.718 | 26.606 | 22.365 |
| H | 26.922 | 27.468 | 22.002 |
| H | 25.77  | 26.522 | 22.263 |
| O | 12.169 | 19.132 | 33.848 |
| H | 12.133 | 18.575 | 33.07  |
| H | 11.785 | 19.962 | 33.566 |
| O | 20.485 | 24.189 | 26.946 |
| H | 19.824 | 23.499 | 26.989 |
| H | 20.982 | 24.095 | 27.759 |
| O | 13.474 | 28.382 | 29.119 |
| H | 14.419 | 28.431 | 29.264 |
| H | 13.146 | 29.24  | 29.391 |
| O | 18.257 | 28.509 | 30.224 |
| H | 18.347 | 29.452 | 30.087 |
| H | 19.118 | 28.152 | 30.008 |
| O | 17.616 | 30.699 | 27.489 |
| H | 18.476 | 30.45  | 27.83  |
| H | 17.308 | 29.921 | 27.025 |
| O | 20.676 | 27.261 | 30.028 |
| H | 20.794 | 26.311 | 30.033 |
| H | 21.132 | 27.563 | 30.814 |
| O | 20.288 | 30.264 | 27.478 |
| H | 21.034 | 30.563 | 27.997 |
| H | 20.599 | 29.467 | 27.049 |
| O | 17.431 | 24.711 | 33.291 |
| H | 18.114 | 24.165 | 32.902 |
| H | 17.703 | 25.608 | 33.098 |
| O | 14.234 | 29.451 | 25.8   |
| H | 13.729 | 28.82  | 25.288 |
| H | 13.582 | 30.076 | 26.118 |
| O | 21.841 | 25.67  | 24.919 |
| H | 21.461 | 24.958 | 25.433 |

|   |        |        |        |
|---|--------|--------|--------|
| H | 22.774 | 25.46  | 24.871 |
| O | 29.046 | 24.005 | 30.607 |
| H | 28.918 | 23.161 | 31.04  |
| H | 28.924 | 24.652 | 31.302 |
| O | 23.943 | 26.468 | 22.389 |
| H | 23.24  | 27.114 | 22.464 |
| H | 23.571 | 25.769 | 21.852 |
| O | 12.238 | 24.196 | 24.379 |
| H | 12.264 | 25.01  | 23.876 |
| H | 13.158 | 23.962 | 24.504 |
| O | 14.585 | 30.731 | 16.435 |
| H | 15.025 | 30.964 | 15.618 |
| H | 15.297 | 30.594 | 17.06  |
| O | 13.619 | 27.917 | 18.44  |
| H | 14.291 | 28.521 | 18.757 |
| H | 13.651 | 27.182 | 19.051 |
| O | 18.176 | 26.857 | 16.936 |
| H | 17.888 | 25.989 | 17.218 |
| H | 17.621 | 27.464 | 17.426 |
| O | 13.323 | 32.607 | 17.845 |
| H | 13.569 | 33.321 | 17.257 |
| H | 13.903 | 31.886 | 17.601 |
| O | 24.608 | 30.968 | 17.556 |
| H | 24.77  | 31.723 | 16.991 |
| H | 24.687 | 31.312 | 18.446 |
| O | 13.129 | 20.587 | 24.819 |
| H | 14.035 | 20.781 | 25.059 |
| H | 12.692 | 21.438 | 24.822 |
| O | 23.146 | 31.118 | 22.018 |
| H | 22.361 | 31.601 | 22.276 |
| H | 23.577 | 31.685 | 21.38  |
| O | 21.864 | 31.131 | 14.358 |
| H | 22.43  | 31.33  | 13.612 |
| H | 22.398 | 30.572 | 14.922 |
| O | 17.794 | 32.381 | 17.737 |
| H | 18.417 | 32.355 | 18.463 |
| H | 17.235 | 31.616 | 17.873 |
| O | 21.06  | 28.306 | 25.498 |
| H | 20.998 | 27.406 | 25.18  |
| H | 21.99  | 28.522 | 25.427 |
| O | 8.368  | 24.538 | 22.244 |
| H | 8.26   | 25.485 | 22.33  |
| H | 8.09   | 24.345 | 21.349 |
| O | 14.801 | 26.026 | 20.08  |
| H | 15.168 | 25.155 | 19.923 |
| H | 14.58  | 26.028 | 21.011 |
| O | 11.605 | 29.867 | 17.285 |

|   |        |        |        |
|---|--------|--------|--------|
| H | 11.941 | 29.176 | 17.856 |
| H | 12.281 | 29.973 | 16.615 |
| O | 11.77  | 26.697 | 27.758 |
| H | 12.281 | 27.238 | 28.36  |
| H | 10.88  | 27.045 | 27.821 |
| O | 16.841 | 21.428 | 19.485 |
| H | 17.664 | 21.307 | 19.96  |
| H | 16.432 | 20.562 | 19.491 |
| O | 18.218 | 30.917 | 13.635 |
| H | 19.02  | 31.44  | 13.633 |
| H | 17.531 | 31.533 | 13.89  |
| O | 19.683 | 31.273 | 19.221 |
| H | 20.549 | 31.558 | 19.514 |
| H | 19.263 | 30.935 | 20.012 |
| O | 16.147 | 31.036 | 24.68  |
| H | 15.607 | 30.323 | 25.021 |
| H | 16.072 | 31.728 | 25.337 |
| O | 15.518 | 30.124 | 19.132 |
| H | 15.1   | 30.613 | 19.841 |
| H | 16.381 | 29.894 | 19.476 |
| O | 12.982 | 31.74  | 23.971 |
| H | 13.642 | 32.434 | 23.982 |
| H | 12.747 | 31.618 | 24.891 |
| O | 14.1   | 25.544 | 16.465 |
| H | 14.254 | 26.406 | 16.851 |
| H | 13.352 | 25.195 | 16.95  |
| O | 22.678 | 29.625 | 16.507 |
| H | 23.225 | 30.276 | 16.946 |
| H | 22.985 | 28.785 | 16.848 |
| O | 19.204 | 28.066 | 13.227 |
| H | 19.892 | 28.232 | 12.582 |
| H | 18.729 | 28.895 | 13.289 |
| O | 26.659 | 25.853 | 7.926  |
| H | 27.319 | 26.349 | 8.411  |
| H | 26.742 | 24.958 | 8.256  |
| O | 15.718 | 25.165 | 8.299  |
| H | 16.584 | 24.811 | 8.1    |
| H | 15.678 | 25.178 | 9.255  |
| O | 11.17  | 29.151 | 21.291 |
| H | 12.004 | 29.4   | 21.69  |
| H | 11.226 | 28.201 | 21.193 |
| O | 33.37  | 25.639 | 19.299 |
| H | 32.733 | 25.983 | 19.926 |
| H | 34.157 | 26.164 | 19.446 |
| O | 16.267 | 28.198 | 26.672 |
| H | 16.151 | 27.332 | 26.281 |
| H | 15.448 | 28.656 | 26.485 |

|   |        |        |        |
|---|--------|--------|--------|
| O | 25.075 | 27.949 | 24.701 |
| H | 25.929 | 27.518 | 24.754 |
| H | 24.626 | 27.503 | 23.984 |
| O | 19.353 | 30.071 | 21.619 |
| H | 18.914 | 29.509 | 22.257 |
| H | 20.133 | 30.387 | 22.075 |
| O | 10.628 | 21.988 | 23.73  |
| H | 11.119 | 22.808 | 23.678 |
| H | 10.072 | 21.992 | 22.95  |
| O | 27.111 | 28.882 | 20.581 |
| H | 26.437 | 28.446 | 20.06  |
| H | 27.194 | 29.751 | 20.189 |
| O | 24.864 | 28.34  | 27.769 |
| H | 24.911 | 28.056 | 26.856 |
| H | 24.993 | 27.538 | 28.276 |
| O | 20.749 | 31.69  | 23.145 |
| H | 20.137 | 31.867 | 23.859 |
| H | 20.467 | 32.272 | 22.439 |
| O | 26.818 | 26.169 | 11.249 |
| H | 27.134 | 26.174 | 12.152 |
| H | 25.937 | 26.54  | 11.3   |
| O | 9.952  | 29.522 | 11.572 |
| H | 10.733 | 28.969 | 11.58  |
| H | 10.217 | 30.318 | 12.033 |
| O | 26.258 | 25.458 | 17.288 |
| H | 27.206 | 25.532 | 17.392 |
| H | 26.119 | 25.466 | 16.341 |
| O | 14.62  | 29.462 | 12.835 |
| H | 14.506 | 29.02  | 13.676 |
| H | 15.562 | 29.427 | 12.671 |
| O | 11.198 | 28.961 | 25.719 |
| H | 10.812 | 28.193 | 26.141 |
| H | 10.637 | 29.124 | 24.961 |
| O | 17.29  | 27.644 | 20.529 |
| H | 17.728 | 27.128 | 21.207 |
| H | 16.63  | 27.052 | 20.168 |
| O | 9.673  | 27.338 | 8.737  |
| H | 9.208  | 28.142 | 8.968  |
| H | 9.243  | 27.033 | 7.938  |
| O | 17.386 | 22.204 | 3.892  |
| H | 16.485 | 21.885 | 3.843  |
| H | 17.73  | 21.825 | 4.701  |
| O | 15.103 | 31.043 | 10.626 |
| H | 15.695 | 30.398 | 10.24  |
| H | 15.009 | 30.766 | 11.537 |
| O | 20.817 | 29.522 | 11.52  |
| H | 21.724 | 29.388 | 11.794 |



|   |        |        |        |
|---|--------|--------|--------|
| H | 20.821 | 30.376 | 11.088 |
| O | 20.925 | 27.96  | 8.713  |
| H | 20.995 | 28.704 | 9.311  |
| H | 20.462 | 28.309 | 7.951  |
| O | 20.656 | 25.108 | 5.925  |
| H | 19.745 | 25.334 | 6.111  |
| H | 20.606 | 24.507 | 5.182  |
| O | 14.253 | 26.808 | 7.076  |
| H | 14.676 | 26.092 | 7.549  |
| H | 14.122 | 27.488 | 7.737  |
| O | 16.955 | 15.331 | 32.7   |
| H | 16.55  | 15.37  | 33.566 |
| H | 16.453 | 15.951 | 32.171 |
| O | 21.44  | 22.08  | 30.761 |
| H | 22.317 | 22.004 | 30.384 |
| H | 21.373 | 21.338 | 31.362 |
| O | 12.756 | 16.479 | 24.912 |
| H | 13.482 | 16.7   | 25.496 |
| H | 12.671 | 17.239 | 24.337 |
| O | 16.042 | 14.118 | 27.054 |
| H | 15.404 | 14.757 | 26.737 |
| H | 16.134 | 14.312 | 27.986 |
| O | 22.676 | 17.042 | 33.605 |
| H | 23.063 | 16.219 | 33.905 |
| H | 21.794 | 17.042 | 33.976 |
| O | 4.385  | 14.355 | 22.132 |
| H | 4.404  | 14.303 | 21.176 |
| H | 5.022  | 15.036 | 22.348 |
| O | 16.029 | 25.333 | 26.761 |
| H | 16.951 | 25.579 | 26.679 |
| H | 15.939 | 25.037 | 27.667 |
| O | 11.873 | 17.622 | 29.258 |
| H | 11.424 | 17.928 | 28.469 |
| H | 12.778 | 17.482 | 28.979 |
| O | 23.729 | 23.294 | 23.224 |
| H | 24.058 | 24.189 | 23.134 |
| H | 24.062 | 22.838 | 22.451 |
| O | 19.392 | 20.508 | 33.059 |
| H | 19.681 | 19.86  | 32.416 |
| H | 20.188 | 20.746 | 33.533 |
| O | 33.331 | 12.525 | 26.742 |
| H | 33.384 | 13.096 | 27.509 |
| H | 32.414 | 12.57  | 26.472 |
| O | 14.938 | 14.961 | 34.797 |
| H | 14.775 | 14.024 | 34.687 |
| H | 14.259 | 15.252 | 35.406 |
| O | 10.502 | 21.215 | 32.977 |

|   |        |        |        |
|---|--------|--------|--------|
| H | 10.478 | 21.586 | 33.858 |
| H | 11.075 | 21.803 | 32.484 |
| O | 21.786 | 24.636 | 30.15  |
| H | 22.028 | 23.795 | 30.538 |
| H | 22.583 | 24.936 | 29.713 |
| O | 19.4   | 13.241 | 34.309 |
| H | 19.748 | 12.462 | 33.876 |
| H | 18.695 | 12.911 | 34.866 |
| O | 15.76  | 9.473  | 30.393 |
| H | 14.834 | 9.234  | 30.432 |
| H | 15.937 | 9.596  | 29.461 |
| O | 19.217 | 23.957 | 31.127 |
| H | 20.148 | 24.159 | 31.03  |
| H | 19.154 | 23.022 | 30.934 |
| O | 19.267 | 10.349 | 29.028 |
| H | 18.369 | 10.678 | 28.982 |
| H | 19.722 | 10.973 | 29.593 |
| O | 16.387 | 20.326 | 30.157 |
| H | 16.358 | 20.609 | 31.071 |
| H | 17.16  | 20.758 | 29.797 |
| O | 6.095  | 13.607 | 30.531 |
| H | 5.914  | 14.046 | 31.362 |
| H | 5.245  | 13.568 | 30.091 |
| O | 21.717 | 19.25  | 31.351 |
| H | 22.221 | 19.013 | 30.573 |
| H | 21.531 | 18.414 | 31.779 |
| O | 21.773 | 16.589 | 28.207 |
| H | 21.965 | 16.894 | 27.32  |
| H | 22.616 | 16.28  | 28.541 |
| O | 30.768 | 14.722 | 29.267 |
| H | 30.961 | 15.589 | 28.908 |
| H | 31.615 | 14.279 | 29.291 |
| O | 25.178 | 27.253 | 30.538 |
| H | 26.098 | 27.493 | 30.65  |
| H | 24.755 | 28.057 | 30.237 |
| O | 19.91  | 17.365 | 34.391 |
| H | 19.781 | 16.988 | 35.261 |
| H | 19.934 | 18.31  | 34.541 |
| O | 7.472  | 18.784 | 29.415 |
| H | 6.896  | 18.049 | 29.205 |
| H | 7.735  | 18.631 | 30.322 |
| O | 13.558 | 25.662 | 30.212 |
| H | 13.476 | 26.59  | 30.432 |
| H | 13.048 | 25.56  | 29.408 |
| O | 19.811 | 22.199 | 24.228 |
| H | 20.647 | 22.43  | 24.631 |
| H | 19.187 | 22.198 | 24.953 |

|   |        |        |        |
|---|--------|--------|--------|
| O | 27.923 | 8.658  | 28.649 |
| H | 28.431 | 9.442  | 28.441 |
| H | 28.362 | 7.955  | 28.171 |
| O | 22.458 | 17.144 | 25.325 |
| H | 22.54  | 16.622 | 24.528 |
| H | 23.125 | 17.825 | 25.235 |
| O | 12.872 | 12.642 | 31.282 |
| H | 13.08  | 12.215 | 32.114 |
| H | 12.789 | 13.569 | 31.504 |
| O | 28.235 | 15.187 | 27.246 |
| H | 28.641 | 15.958 | 27.641 |
| H | 28.357 | 15.307 | 26.304 |
| O | 21.999 | 28.447 | 22.887 |
| H | 21.135 | 28.619 | 23.261 |
| H | 22.272 | 29.286 | 22.517 |
| O | 11.937 | 14.865 | 28.668 |
| H | 11.386 | 14.863 | 27.885 |
| H | 11.646 | 15.632 | 29.162 |
| O | 20.122 | 14.863 | 32.256 |
| H | 19.815 | 15.711 | 32.578 |
| H | 20.11  | 14.296 | 33.026 |
| O | 12.206 | 23.256 | 31.77  |
| H | 13.122 | 23.494 | 31.626 |
| H | 11.757 | 23.541 | 30.974 |
| O | 10.115 | 20.572 | 28.846 |
| H | 9.487  | 20.234 | 29.485 |
| H | 10.295 | 19.828 | 28.271 |
| O | 21.743 | 21.82  | 27.681 |
| H | 22.61  | 21.852 | 27.276 |
| H | 21.234 | 21.243 | 27.112 |
| O | 14.851 | 23.762 | 24.915 |
| H | 15.36  | 24.056 | 24.159 |
| H | 15.232 | 24.231 | 25.657 |
| O | 17.235 | 13.891 | 29.551 |
| H | 16.489 | 13.548 | 30.042 |
| H | 17.465 | 14.704 | 30     |
| O | 12.496 | 18.392 | 23.093 |
| H | 12.583 | 19.222 | 23.562 |
| H | 12.739 | 18.6   | 22.191 |
| O | 13.511 | 21.266 | 28.659 |
| H | 12.659 | 21.659 | 28.471 |
| H | 13.674 | 21.478 | 29.579 |
| O | 19.58  | 12.408 | 31.127 |
| H | 19.432 | 13.285 | 31.481 |
| H | 19.842 | 11.885 | 31.885 |
| O | 9.923  | 17.477 | 27.295 |
| H | 9.111  | 17.051 | 27.568 |

|   |        |        |        |
|---|--------|--------|--------|
| H | 10.363 | 16.827 | 26.747 |
| O | 18.347 | 8.686  | 25.953 |
| H | 18.62  | 9.597  | 26.065 |
| H | 18.068 | 8.41   | 26.826 |
| O | 15.273 | 18.259 | 34.139 |
| H | 14.368 | 18.555 | 34.047 |
| H | 15.707 | 18.562 | 33.342 |
| O | 25.163 | 21.625 | 31.806 |
| H | 25.502 | 21.439 | 30.93  |
| H | 24.998 | 20.762 | 32.187 |
| O | 24.758 | 23.037 | 28.812 |
| H | 24.497 | 23.059 | 27.891 |
| H | 25.629 | 22.639 | 28.804 |
| O | 31.006 | 24.973 | 26.133 |
| H | 31.048 | 25.098 | 27.081 |
| H | 31.194 | 24.044 | 26.005 |
| O | 21.843 | 14.029 | 29.919 |
| H | 21.364 | 13.201 | 29.9   |
| H | 21.47  | 14.505 | 30.661 |
| O | 24.263 | 12.291 | 32.764 |
| H | 23.45  | 11.919 | 33.108 |
| H | 24.274 | 12.031 | 31.843 |
| O | 3.691  | 13.415 | 24.653 |
| H | 3.879  | 13.535 | 23.722 |
| H | 4.249  | 12.684 | 24.918 |
| O | 10.883 | 14.903 | 26.04  |
| H | 10.417 | 14.692 | 25.231 |
| H | 11.719 | 15.265 | 25.746 |
| O | 27.401 | 26.591 | 25.41  |
| H | 27.41  | 26.62  | 26.367 |
| H | 28.087 | 27.203 | 25.145 |
| O | 21.655 | 11.816 | 28.049 |
| H | 22.116 | 11.342 | 28.742 |
| H | 22.219 | 11.724 | 27.281 |
| O | 9.156  | 25.736 | 30.419 |
| H | 9.733  | 25.049 | 30.755 |
| H | 9.06   | 26.347 | 31.149 |
| O | 13.533 | 12.733 | 28.119 |
| H | 14.455 | 12.946 | 27.977 |
| H | 13.182 | 13.489 | 28.589 |
| O | 17.614 | 10.009 | 32.893 |
| H | 17.33  | 10.878 | 33.18  |
| H | 17.164 | 9.874  | 32.059 |
| O | 23.935 | 13.857 | 27.143 |
| H | 23.268 | 14.002 | 27.814 |
| H | 24.462 | 14.655 | 27.153 |
| O | 18.692 | 26.056 | 26.329 |

|   |        |        |        |
|---|--------|--------|--------|
| H | 19.128 | 26.796 | 26.752 |
| H | 19.378 | 25.394 | 26.239 |
| O | 11.851 | 12.855 | 23.124 |
| H | 11.658 | 13.712 | 22.744 |
| H | 12.698 | 12.969 | 23.555 |
| O | 15.626 | 12.123 | 30.89  |
| H | 15.657 | 11.216 | 30.585 |
| H | 14.766 | 12.438 | 30.611 |
| O | 15.9   | 21.018 | 35.538 |
| H | 15.706 | 20.102 | 35.736 |
| H | 16.309 | 21.355 | 36.335 |
| O | 10.014 | 20.59  | 26.179 |
| H | 9.549  | 21.152 | 26.799 |
| H | 10.185 | 21.155 | 25.426 |
| O | 19.394 | 15.833 | 16.886 |
| H | 20.083 | 16.332 | 17.326 |
| H | 18.978 | 15.332 | 17.587 |
| O | 20.054 | 26.94  | 20.282 |
| H | 19.373 | 27.3   | 19.714 |
| H | 19.839 | 26.01  | 20.354 |
| O | 16.945 | 12.623 | 24.602 |
| H | 16.984 | 12.276 | 23.71  |
| H | 17.651 | 12.172 | 25.065 |
| O | 22.958 | 16.088 | 5.736  |
| H | 22.339 | 16.502 | 6.337  |
| H | 23.819 | 16.312 | 6.088  |
| O | 23.37  | 10.671 | 13.931 |
| H | 22.71  | 9.994  | 14.082 |
| H | 22.878 | 11.41  | 13.574 |
| O | 15.044 | 14.239 | 14.849 |
| H | 14.889 | 15.184 | 14.839 |
| H | 15.803 | 14.127 | 15.421 |
| O | 17.468 | 17.185 | 14.984 |
| H | 17.92  | 16.542 | 15.53  |
| H | 16.609 | 17.286 | 15.394 |
| O | 14.403 | 16.848 | 15.969 |
| H | 13.948 | 17.67  | 16.154 |
| H | 14.21  | 16.292 | 16.723 |
| O | 15.941 | 22.78  | 28.839 |
| H | 15.971 | 22.046 | 29.452 |
| H | 16.454 | 23.468 | 29.264 |
| O | 9.19   | 26.368 | 11.58  |
| H | 9.137  | 26.834 | 10.746 |
| H | 8.366  | 26.573 | 12.023 |
| O | 25.461 | 27.257 | 19.145 |
| H | 24.532 | 27.278 | 19.375 |
| H | 25.525 | 26.581 | 18.47  |

|   |        |        |        |
|---|--------|--------|--------|
| O | 25.425 | 11.559 | 27.11  |
| H | 24.902 | 12.36  | 27.139 |
| H | 25.715 | 11.43  | 28.013 |
| O | 18.419 | 5.694  | 17.961 |
| H | 17.904 | 5.222  | 17.306 |
| H | 19.284 | 5.287  | 17.924 |
| O | 25.06  | 21.993 | 21.145 |
| H | 25.996 | 22.109 | 20.98  |
| H | 24.83  | 21.197 | 20.666 |
| O | 29.628 | 17.598 | 10.714 |
| H | 29.801 | 18.391 | 11.222 |
| H | 30.054 | 16.899 | 11.21  |
| O | 17.57  | 13.249 | 16.234 |
| H | 18.437 | 13.654 | 16.246 |
| H | 17.195 | 13.459 | 17.089 |
| O | 15.28  | 15.817 | 12.454 |
| H | 14.861 | 15.48  | 11.662 |
| H | 15.297 | 15.07  | 13.052 |
| O | 21.627 | 12.663 | 13.231 |
| H | 21.25  | 12.924 | 14.071 |
| H | 21.47  | 13.412 | 12.655 |
| O | 17.755 | 15.73  | 25.649 |
| H | 18.607 | 15.4   | 25.932 |
| H | 17.126 | 15.092 | 25.988 |
| O | 30.373 | 25.709 | 28.908 |
| H | 30.294 | 24.934 | 29.464 |
| H | 29.553 | 26.184 | 29.04  |
| O | 18.731 | 22.555 | 17.426 |
| H | 17.984 | 22.738 | 16.856 |
| H | 18.404 | 22.718 | 18.31  |
| O | 16.305 | 13.653 | 9.176  |
| H | 15.683 | 13.996 | 9.818  |
| H | 15.787 | 13.539 | 8.379  |
| O | 14.368 | 13.467 | 21.096 |
| H | 14.669 | 14.215 | 21.613 |
| H | 14.139 | 13.841 | 20.245 |
| O | 22.909 | 23.677 | 16.692 |
| H | 22.302 | 24.379 | 16.929 |
| H | 22.394 | 22.875 | 16.78  |
| O | 22.343 | 26.264 | 13.759 |
| H | 21.624 | 26.451 | 13.154 |
| H | 22.138 | 26.778 | 14.54  |
| O | 28.285 | 4.477  | 19.359 |
| H | 29.064 | 4.957  | 19.64  |
| H | 28.469 | 3.566  | 19.587 |
| O | 8.898  | 18.427 | 15.597 |
| H | 9.56   | 19.004 | 15.215 |

|   |        |        |        |
|---|--------|--------|--------|
| H | 8.079  | 18.693 | 15.179 |
| O | 11.489 | 21.897 | 12.634 |
| H | 12.403 | 21.614 | 12.659 |
| H | 11.531 | 22.85  | 12.711 |
| O | 21.335 | 19.709 | 23.292 |
| H | 20.775 | 20.422 | 23.599 |
| H | 20.725 | 19.007 | 23.064 |
| O | 19.946 | 29.885 | 16.909 |
| H | 20.864 | 29.831 | 16.642 |
| H | 19.97  | 30.307 | 17.768 |
| O | 13.262 | 26.321 | 13.77  |
| H | 13.79  | 27.004 | 14.183 |
| H | 13.563 | 25.508 | 14.176 |
| O | 25.524 | 21.135 | 12.809 |
| H | 25.102 | 20.588 | 12.146 |
| H | 25.298 | 22.031 | 12.559 |
| O | 27.382 | 25.171 | 14.397 |
| H | 27.956 | 24.443 | 14.635 |
| H | 26.543 | 24.758 | 14.194 |
| O | 19.293 | 13.239 | 27.628 |
| H | 18.729 | 13.63  | 28.295 |
| H | 20.128 | 13.096 | 28.074 |
| O | 11.386 | 16.902 | 19.667 |
| H | 10.675 | 17.357 | 19.216 |
| H | 11.773 | 17.567 | 20.236 |
| O | 9.365  | 12.364 | 8.054  |
| H | 9.292  | 11.497 | 7.656  |
| H | 10.244 | 12.381 | 8.432  |
| O | 14.224 | 10.457 | 25.473 |
| H | 13.675 | 10.076 | 24.788 |
| H | 13.607 | 10.898 | 26.057 |
| O | 27.741 | 16.05  | 24.581 |
| H | 26.823 | 16.164 | 24.335 |
| H | 28.205 | 16.731 | 24.094 |
| O | 15.712 | 18.646 | 24.882 |
| H | 16.604 | 18.442 | 24.598 |
| H | 15.821 | 19.333 | 25.539 |
| O | 18.883 | 6.511  | 14.197 |
| H | 19.033 | 5.952  | 14.959 |
| H | 19.752 | 6.635  | 13.816 |
| O | 24.681 | 20.073 | 14.961 |
| H | 23.846 | 20.534 | 15.05  |
| H | 25.116 | 20.506 | 14.227 |
| O | 18.261 | 22.005 | 26.323 |
| H | 17.341 | 22.148 | 26.101 |
| H | 18.241 | 21.652 | 27.212 |
| O | 15.03  | 16.584 | 26.547 |

|   |        |        |        |
|---|--------|--------|--------|
| H | 15.496 | 17.223 | 26.006 |
| H | 14.873 | 17.039 | 27.374 |
| O | 19.257 | 18.968 | 27.196 |
| H | 19.113 | 18.833 | 26.259 |
| H | 19.164 | 18.097 | 27.581 |
| O | 13.242 | 15.061 | 18.782 |
| H | 12.414 | 14.723 | 18.441 |
| H | 13.003 | 15.872 | 19.231 |
| O | 18.487 | 11.278 | 13.645 |
| H | 18.181 | 11.915 | 13     |
| H | 18.748 | 11.807 | 14.399 |
| O | 16.854 | 8.504  | 19.286 |
| H | 17.512 | 8.476  | 19.98  |
| H | 16.016 | 8.472  | 19.748 |
| O | 14.272 | 18.25  | 13.393 |
| H | 14.767 | 17.467 | 13.154 |
| H | 13.532 | 18.261 | 12.786 |
| O | 21.4   | 11.534 | 24.354 |
| H | 22.108 | 10.945 | 24.616 |
| H | 21.833 | 12.373 | 24.195 |
| O | 14.464 | 18.51  | 28.583 |
| H | 13.694 | 19.017 | 28.328 |
| H | 14.964 | 19.1   | 29.147 |
| O | 13.277 | 19.405 | 15.875 |
| H | 13.618 | 19.224 | 14.999 |
| H | 13.859 | 20.078 | 16.225 |
| O | 15.771 | 14.127 | 18.118 |
| H | 16.154 | 14.342 | 18.969 |
| H | 14.88  | 14.475 | 18.163 |
| O | 14.25  | 22.462 | 13.34  |
| H | 14.147 | 22.425 | 12.389 |
| H | 15.019 | 23.016 | 13.476 |
| O | 16.827 | 11.302 | 10.527 |
| H | 17.434 | 11.501 | 11.239 |
| H | 16.743 | 12.126 | 10.047 |
| O | 14.742 | 28.238 | 15.334 |
| H | 14.438 | 28.843 | 16.011 |
| H | 15.695 | 28.235 | 15.425 |
| O | 22.076 | 9.108  | 15.841 |
| H | 22.533 | 9.041  | 16.68  |
| H | 21.422 | 9.793  | 15.978 |
| O | 24.223 | 17.423 | 14.731 |
| H | 23.553 | 17.297 | 15.402 |
| H | 24.473 | 18.344 | 14.812 |
| O | 6.718  | 15.743 | 20.562 |
| H | 6.749  | 16.374 | 21.281 |
| H | 7.498  | 15.202 | 20.685 |



|   |        |        |        |
|---|--------|--------|--------|
| O | 10.755 | 23.099 | 29.429 |
| H | 10.654 | 22.161 | 29.268 |
| H | 10.382 | 23.516 | 28.652 |
| O | 27.991 | 19.053 | 24.709 |
| H | 27.83  | 19.759 | 24.083 |
| H | 27.119 | 18.729 | 24.934 |
| O | 26.205 | 13.685 | 6.223  |
| H | 26.475 | 12.817 | 6.523  |
| H | 25.384 | 13.533 | 5.756  |
| O | 25.571 | 16.088 | 26.879 |
| H | 25.369 | 16.91  | 26.432 |
| H | 26.523 | 16.094 | 26.975 |
| O | 24.569 | 19.77  | 10.825 |
| H | 23.627 | 19.909 | 10.921 |
| H | 24.689 | 18.832 | 10.973 |
| O | 21.065 | 25.826 | 17.148 |
| H | 21.323 | 26.57  | 17.693 |
| H | 20.241 | 26.1   | 16.744 |
| O | 7.429  | 14.828 | 14.904 |
| H | 7.2    | 14.177 | 14.241 |
| H | 8.385  | 14.873 | 14.875 |
| O | 19.662 | 19.241 | 14.753 |
| H | 19.241 | 19.991 | 14.332 |
| H | 18.958 | 18.601 | 14.862 |
| O | 25.015 | 25.077 | 25.389 |
| H | 24.909 | 25.396 | 26.285 |
| H | 25.954 | 25.154 | 25.217 |
| O | 15.648 | 10.447 | 15.077 |
| H | 15.635 | 9.705  | 15.681 |
| H | 16.538 | 10.456 | 14.726 |
| O | 24.255 | 22.071 | 26.165 |
| H | 25.154 | 22.104 | 25.836 |
| H | 23.727 | 22.436 | 25.455 |
| O | 19.663 | 25.389 | 12.536 |
| H | 19.505 | 26.136 | 13.115 |
| H | 19.449 | 25.714 | 11.662 |
| O | 22.74  | 15.438 | 22.947 |
| H | 23.517 | 15.344 | 22.397 |
| H | 22.671 | 14.602 | 23.409 |
| O | 14.287 | 21.072 | 10.769 |
| H | 15.146 | 20.653 | 10.73  |
| H | 14.247 | 21.611 | 9.979  |
| O | 9.796  | 9.679  | 25.912 |
| H | 9.944  | 10.403 | 26.52  |
| H | 8.844  | 9.632  | 25.823 |
| O | 22.303 | 16.254 | 11.052 |
| H | 23.249 | 16.2   | 11.189 |

|   |        |        |        |
|---|--------|--------|--------|
| H | 21.924 | 15.914 | 11.862 |
| O | 16.339 | 23.922 | 16.134 |
| H | 16.628 | 24.337 | 15.322 |
| H | 15.499 | 24.337 | 16.33  |
| O | 21.65  | 19.95  | 11.103 |
| H | 21.479 | 19.292 | 11.777 |
| H | 21.353 | 20.773 | 11.491 |
| O | 16.783 | 20.269 | 14.756 |
| H | 16.29  | 20.474 | 15.55  |
| H | 16.349 | 19.496 | 14.397 |
| O | 20.451 | 13.255 | 15.701 |
| H | 20.65  | 13.928 | 16.352 |
| H | 20.389 | 12.444 | 16.206 |
| O | 24.977 | 13.027 | 11.868 |
| H | 25.252 | 12.3   | 12.426 |
| H | 24.624 | 13.676 | 12.477 |
| O | 25.802 | 21.018 | 5.058  |
| H | 26.396 | 20.3   | 4.84   |
| H | 25.694 | 21.497 | 4.237  |
| O | 18.644 | 13.758 | 12.463 |
| H | 18.538 | 14.559 | 12.976 |
| H | 18.746 | 14.063 | 11.561 |
| O | 16.501 | 15.419 | 20.562 |
| H | 16.026 | 15.502 | 21.388 |
| H | 16.832 | 16.3   | 20.386 |
| O | 27.658 | 10.103 | 21.625 |
| H | 28.235 | 10.275 | 20.881 |
| H | 27.592 | 10.945 | 22.077 |
| O | 25.356 | 22.448 | 17.363 |
| H | 25.957 | 23.193 | 17.351 |
| H | 24.51  | 22.82  | 17.113 |
| O | 24.968 | 14.88  | 21.457 |
| H | 25.063 | 13.947 | 21.268 |
| H | 24.656 | 15.261 | 20.636 |
| O | 16.794 | 19.565 | 10.797 |
| H | 16.91  | 18.774 | 11.323 |
| H | 17.268 | 20.244 | 11.278 |
| O | 9.428  | 18.475 | 18.235 |
| H | 8.496  | 18.538 | 18.445 |
| H | 9.453  | 18.386 | 17.282 |
| O | 30.636 | 22.114 | 13.548 |
| H | 31.534 | 22.436 | 13.618 |
| H | 30.729 | 21.169 | 13.423 |
| O | 21.547 | 23.357 | 21.133 |
| H | 22.255 | 23.657 | 20.563 |
| H | 21.957 | 23.253 | 21.991 |
| O | 12.513 | 25.53  | 9.66   |

|   |        |        |        |
|---|--------|--------|--------|
| H | 12.422 | 24.893 | 8.952  |
| H | 11.833 | 26.181 | 9.486  |
| O | 15.709 | 27.732 | 22.834 |
| H | 16.206 | 28.194 | 22.158 |
| H | 16.316 | 27.07  | 23.166 |
| O | 17.379 | 29.438 | 15.92  |
| H | 18.303 | 29.489 | 16.168 |
| H | 17.258 | 30.157 | 15.3   |
| O | 16.011 | 17.212 | 31.043 |
| H | 15.317 | 17.042 | 30.406 |
| H | 16.788 | 17.379 | 30.51  |
| O | 24.396 | 23.347 | 12.071 |
| H | 24.119 | 24.109 | 11.562 |
| H | 23.629 | 23.12  | 12.597 |
| O | 9.908  | 17.41  | 23.452 |
| H | 10.793 | 17.759 | 23.344 |
| H | 9.347  | 18.185 | 23.484 |
| O | 14.078 | 22.542 | 8.549  |
| H | 14.538 | 23.355 | 8.338  |
| H | 13.169 | 22.71  | 8.303  |
| O | 15.072 | 21.246 | 16.941 |
| H | 15.033 | 21.149 | 17.893 |
| H | 15.506 | 22.088 | 16.804 |
| O | 17.755 | 17.448 | 12.332 |
| H | 18.247 | 17.413 | 13.152 |
| H | 16.93  | 17.005 | 12.528 |
| O | 16.921 | 23.022 | 22.968 |
| H | 16.499 | 23.164 | 22.121 |
| H | 17.771 | 22.638 | 22.751 |
| O | 8.472  | 19.84  | 23.852 |
| H | 8.277  | 20.697 | 23.474 |
| H | 8.95   | 20.037 | 24.658 |
| O | 17.786 | 21.334 | 12.658 |
| H | 17.278 | 22.145 | 12.626 |
| H | 17.52  | 20.917 | 13.477 |
| O | 11.65  | 21.466 | 19.131 |
| H | 12.012 | 20.691 | 18.703 |
| H | 11.042 | 21.833 | 18.489 |
| O | 19.878 | 12.178 | 8.33   |
| H | 20.645 | 12.75  | 8.341  |
| H | 19.732 | 11.955 | 9.249  |
| O | 25.465 | 16.898 | 23.713 |
| H | 25.257 | 16.216 | 23.076 |
| H | 24.796 | 17.568 | 23.574 |
| O | 25.204 | 18.77  | 26.226 |
| H | 24.96  | 19.407 | 25.555 |
| H | 24.691 | 19.022 | 26.994 |

|   |        |        |        |
|---|--------|--------|--------|
| O | 12.147 | 6.908  | 26.549 |
| H | 12.898 | 6.828  | 25.962 |
| H | 11.651 | 7.651  | 26.203 |
| O | 11.774 | 9.792  | 11.863 |
| H | 12.611 | 10.227 | 12.022 |
| H | 11.921 | 9.271  | 11.074 |
| O | 17.469 | 25.759 | 23.544 |
| H | 17.553 | 24.829 | 23.332 |
| H | 18.056 | 25.889 | 24.288 |
| O | 14.927 | 15.308 | 22.925 |
| H | 14.754 | 14.585 | 23.528 |
| H | 14.552 | 16.075 | 23.358 |
| O | 27.736 | 17.219 | 19.315 |
| H | 27.382 | 17.243 | 18.426 |
| H | 27.865 | 16.288 | 19.496 |
| O | 16.768 | 12.765 | 5.92   |
| H | 17.458 | 12.865 | 6.575  |
| H | 16.063 | 12.31  | 6.381  |
| O | 16.482 | 30.519 | 22.119 |
| H | 17.414 | 30.43  | 21.92  |
| H | 16.46  | 30.887 | 23.003 |
| O | 14.371 | 13.497 | 24.665 |
| H | 13.969 | 12.678 | 24.955 |
| H | 15.312 | 13.331 | 24.71  |
| O | 19.094 | 11.327 | 25.729 |
| H | 19.08  | 11.87  | 26.518 |
| H | 19.942 | 11.511 | 25.326 |
| O | 20.33  | 2.519  | 14.449 |
| H | 20.702 | 2.649  | 13.576 |
| H | 21.004 | 2.843  | 15.046 |
| O | 10.493 | 14.62  | 6.71   |
| H | 11.024 | 14.708 | 7.502  |
| H | 10.017 | 13.799 | 6.831  |
| O | 18.687 | 29.294 | 24.049 |
| H | 19.196 | 29.293 | 24.859 |
| H | 17.776 | 29.344 | 24.338 |
| O | 20.257 | 22.752 | 12.421 |
| H | 19.441 | 22.302 | 12.202 |
| H | 19.999 | 23.665 | 12.552 |
| O | 16.52  | 23.984 | 12.622 |
| H | 16.125 | 24.529 | 11.941 |
| H | 17.05  | 24.593 | 13.138 |
| O | 9.36   | 26.219 | 24.548 |
| H | 9.741  | 25.846 | 25.343 |
| H | 8.518  | 25.773 | 24.454 |
| O | 21.31  | 21.552 | 17.118 |
| H | 20.371 | 21.738 | 17.095 |

|   |        |        |        |
|---|--------|--------|--------|
| H | 21.367 | 20.637 | 17.392 |
| O | 26.912 | 22.294 | 24.819 |
| H | 27.582 | 22.928 | 25.074 |
| H | 27.283 | 21.845 | 24.059 |
| O | 26.128 | 20.794 | 8.596  |
| H | 25.623 | 21.575 | 8.823  |
| H | 25.934 | 20.171 | 9.297  |
| O | 28.098 | 12.063 | 12.714 |
| H | 28.49  | 12.491 | 11.953 |
| H | 27.572 | 11.353 | 12.345 |
| O | 20.386 | 16.855 | 22.874 |
| H | 19.688 | 16.2   | 22.901 |
| H | 21.169 | 16.361 | 22.63  |
| O | 20.219 | 17.398 | 9.613  |
| H | 21.062 | 17.358 | 10.063 |
| H | 19.753 | 16.615 | 9.906  |
| O | 16.815 | 12.151 | 21.77  |
| H | 15.968 | 12.574 | 21.625 |
| H | 17.118 | 11.915 | 20.894 |
| O | 23.346 | 13.405 | 24.485 |
| H | 23.579 | 13.548 | 25.403 |
| H | 24.171 | 13.162 | 24.065 |
| O | 13.765 | 10.058 | 8.48   |
| H | 13.369 | 9.811  | 7.644  |
| H | 13.745 | 9.255  | 9.001  |
| O | 14.298 | 10.813 | 12.508 |
| H | 14.985 | 10.8   | 11.841 |
| H | 14.71  | 10.432 | 13.283 |
| O | 9.276  | 9.6    | 12.286 |
| H | 9.228  | 10.347 | 12.883 |
| H | 10.196 | 9.561  | 12.025 |
| O | 27.973 | 19.014 | 7.91   |
| H | 27.322 | 19.715 | 7.966  |
| H | 27.618 | 18.314 | 8.458  |
| O | 8.414  | 13.815 | 22.047 |
| H | 8.693  | 12.915 | 21.88  |
| H | 9.23   | 14.309 | 22.122 |
| O | 27.268 | 12.771 | 15.442 |
| H | 26.34  | 12.54  | 15.396 |
| H | 27.646 | 12.406 | 14.643 |
| O | 20.594 | 10.31  | 22.154 |
| H | 21.357 | 9.739  | 22.06  |
| H | 20.755 | 10.793 | 22.965 |
| O | 29.545 | 13.664 | 8.748  |
| H | 28.742 | 13.678 | 9.268  |
| H | 30.139 | 13.095 | 9.239  |
| O | 23.224 | 6.175  | 17.644 |

|   |        |        |        |
|---|--------|--------|--------|
| H | 23.777 | 6.187  | 16.863 |
| H | 22.995 | 7.093  | 17.788 |
| O | 19.409 | 24.33  | 19.467 |
| H | 20.177 | 23.984 | 19.922 |
| H | 19.523 | 24.05  | 18.559 |
| O | 7.605  | 10.179 | 21.005 |
| H | 8.263  | 10.849 | 21.186 |
| H | 7.961  | 9.687  | 20.265 |
| O | 15.15  | 23.322 | 20.352 |
| H | 15.685 | 22.545 | 20.191 |
| H | 14.359 | 22.986 | 20.773 |
| O | 22.52  | 22.091 | 13.856 |
| H | 21.633 | 22.215 | 13.52  |
| H | 22.443 | 22.242 | 14.798 |
| O | 18.279 | 15.065 | 22.961 |
| H | 17.794 | 15.164 | 23.781 |
| H | 17.829 | 14.357 | 22.501 |
| O | 15.927 | 8.033  | 16.597 |
| H | 15.802 | 7.089  | 16.502 |
| H | 16.391 | 8.13   | 17.429 |
| O | 28.018 | 22.874 | 19.665 |
| H | 27.946 | 21.926 | 19.553 |
| H | 28.904 | 23.008 | 20.002 |
| O | 17.628 | 25.957 | 14.337 |
| H | 17.759 | 26.13  | 15.27  |
| H | 18.137 | 26.635 | 13.894 |
| O | 18.063 | 3.425  | 16.417 |
| H | 18.713 | 3.289  | 15.728 |
| H | 17.221 | 3.282  | 15.984 |
| O | 18.629 | 18.047 | 24.495 |
| H | 19.425 | 17.798 | 24.027 |
| H | 18.252 | 17.217 | 24.786 |
| O | 23.616 | 28.7   | 12.625 |
| H | 23.669 | 27.819 | 12.996 |
| H | 24.246 | 29.212 | 13.133 |
| O | 19.091 | 21.702 | 21.61  |
| H | 19.893 | 21.913 | 21.132 |
| H | 19.386 | 21.511 | 22.501 |
| O | 25.261 | 30.427 | 14.657 |
| H | 26.169 | 30.713 | 14.566 |
| H | 25.015 | 30.69  | 15.544 |
| O | 23.917 | 24.227 | 20.046 |
| H | 24.379 | 23.451 | 20.363 |
| H | 24.368 | 24.46  | 19.235 |
| O | 21.055 | 15.483 | 13.922 |
| H | 20.52  | 14.923 | 14.484 |
| H | 21.497 | 16.077 | 14.529 |

|   |        |        |        |
|---|--------|--------|--------|
| O | 24.222 | 10.565 | 18.262 |
| H | 24.868 | 9.939  | 18.589 |
| H | 24.551 | 10.82  | 17.4   |
| O | 25.046 | 11.998 | 21.977 |
| H | 25.844 | 12.043 | 22.503 |
| H | 24.907 | 11.062 | 21.832 |
| O | 10.185 | 19.902 | 11.363 |
| H | 10.681 | 20.668 | 11.651 |
| H | 9.446  | 19.854 | 11.969 |
| O | 16.788 | 7.395  | 9.922  |
| H | 17.393 | 8.119  | 9.764  |
| H | 16.281 | 7.668  | 10.686 |
| O | 20.387 | 10.75  | 11.029 |
| H | 20.686 | 11.237 | 11.797 |
| H | 21.093 | 10.129 | 10.849 |
| O | 18.426 | 9.698  | 9.126  |
| H | 19.206 | 9.307  | 9.522  |
| H | 18.13  | 10.342 | 9.769  |
| O | 18.182 | 24.209 | 8.114  |
| H | 18.945 | 24.632 | 8.509  |
| H | 18.506 | 23.359 | 7.818  |
| O | 21.753 | 14.324 | 8.707  |
| H | 21.991 | 14.935 | 9.404  |
| H | 22.481 | 14.373 | 8.087  |
| O | 27.302 | 31.335 | 19.424 |
| H | 27.752 | 31.879 | 20.07  |
| H | 27.117 | 31.93  | 18.697 |
| O | 13.859 | 28.506 | 8.94   |
| H | 13.25  | 28.633 | 9.667  |
| H | 14.025 | 29.389 | 8.609  |
| O | 22.599 | 19.857 | 8.309  |
| H | 22.736 | 20.754 | 8.005  |
| H | 22.329 | 19.952 | 9.222  |
| O | 14.199 | 6.789  | 25.103 |
| H | 14.274 | 7.493  | 24.458 |
| H | 15.096 | 6.639  | 25.399 |
| O | 26.291 | 30.243 | 23.073 |
| H | 26.462 | 29.894 | 22.198 |
| H | 25.381 | 30.539 | 23.04  |
| O | 9.459  | 16.99  | 9.082  |
| H | 8.605  | 16.558 | 9.061  |
| H | 9.255  | 17.925 | 9.078  |
| O | 20.014 | 14.534 | 5.595  |
| H | 19.448 | 15.158 | 6.05   |
| H | 20.885 | 14.929 | 5.634  |
| O | 19.101 | 14.65  | 9.853  |
| H | 18.31  | 14.349 | 9.407  |

|   |        |        |        |
|---|--------|--------|--------|
| H | 19.813 | 14.432 | 9.253  |
| O | 23.137 | 21.46  | 5.15   |
| H | 23.075 | 22.353 | 4.812  |
| H | 24.076 | 21.311 | 5.264  |
| O | 19.734 | 25.768 | 9.831  |
| H | 20.332 | 25.069 | 9.568  |
| H | 20.129 | 26.567 | 9.481  |
| O | 15.175 | 18.744 | 8.697  |
| H | 15.753 | 18.867 | 9.45   |
| H | 15.604 | 18.066 | 8.174  |
| O | 20.98  | 18.384 | 6.461  |
| H | 20.751 | 19.234 | 6.083  |
| H | 21.596 | 18.593 | 7.162  |
| O | 24.633 | 24.894 | 15.023 |
| H | 24.047 | 24.343 | 15.542 |
| H | 24.047 | 25.426 | 14.484 |
| O | 27.14  | 14.032 | 10.141 |
| H | 26.858 | 14.497 | 10.93  |
| H | 26.466 | 13.368 | 10.001 |
| O | 26.89  | 17.52  | 9.823  |
| H | 26.255 | 17.894 | 10.434 |
| H | 27.67  | 17.362 | 10.355 |
| O | 19.228 | 16.616 | 7.143  |
| H | 20.039 | 16.978 | 6.788  |
| H | 19.092 | 17.09  | 7.963  |
| O | 27.373 | 16.141 | 6.634  |
| H | 27.004 | 15.284 | 6.848  |
| H | 27.278 | 16.65  | 7.439  |
| O | 20.518 | 9.114  | 6.35   |
| H | 19.891 | 9.73   | 5.971  |
| H | 20.06  | 8.737  | 7.101  |
| O | 12.036 | 12.55  | 8.6    |
| H | 12.391 | 11.692 | 8.369  |
| H | 12.764 | 13.156 | 8.461  |
| O | 8.073  | 19.293 | 12.916 |
| H | 7.339  | 19.82  | 13.231 |
| H | 7.831  | 18.392 | 13.131 |
| O | 24.885 | 14.894 | 3.349  |
| H | 24.562 | 15.111 | 4.223  |
| H | 24.685 | 13.964 | 3.243  |
| O | 28.786 | 10.546 | 7.084  |
| H | 29.066 | 11.286 | 6.545  |
| H | 27.829 | 10.58  | 7.058  |
| O | 17.516 | 20.477 | 6.169  |
| H | 16.589 | 20.714 | 6.18   |
| H | 17.614 | 19.86  | 6.895  |
| O | 20.423 | 20.967 | 4.975  |



|   |        |        |        |
|---|--------|--------|--------|
| H | 21.356 | 20.762 | 4.921  |
| H | 20.068 | 20.697 | 4.128  |
| O | 18.504 | 19.38  | 8.678  |
| H | 17.977 | 19.426 | 9.475  |
| H | 19.214 | 18.775 | 8.895  |
| O | 24.323 | 25.463 | 9.965  |
| H | 24.664 | 25.721 | 9.109  |
| H | 23.615 | 26.083 | 10.138 |
| O | 7.78   | 29.723 | 15.323 |
| H | 8.247  | 30.226 | 15.99  |
| H | 8.283  | 28.913 | 15.237 |
| O | 28.416 | 15.156 | 4.449  |
| H | 27.651 | 15.38  | 3.918  |
| H | 28.286 | 15.634 | 5.269  |
| O | 8.864  | 19.929 | 8.576  |
| H | 8.631  | 19.973 | 9.504  |
| H | 9.638  | 20.488 | 8.497  |
| O | 24.171 | 22.829 | 8.747  |
| H | 23.279 | 23.17  | 8.821  |
| H | 24.714 | 23.479 | 9.192  |
| O | 21.244 | 23.78  | 8.287  |
| H | 21.294 | 24.432 | 7.588  |
| H | 20.811 | 23.028 | 7.883  |
| O | 4.91   | 24.684 | 9.583  |
| H | 5.146  | 23.81  | 9.273  |
| H | 5.707  | 25.201 | 9.471  |
| O | 14.608 | 18.205 | 4.848  |
| H | 14.401 | 17.63  | 4.112  |
| H | 13.755 | 18.488 | 5.179  |
| O | 19.924 | 21.603 | 7.612  |
| H | 20.045 | 21.457 | 6.674  |
| H | 19.489 | 20.809 | 7.924  |
| O | 14.314 | 14.558 | 7.198  |
| H | 15.157 | 14.999 | 7.097  |
| H | 13.665 | 15.252 | 7.083  |
| O | 17.02  | 28.357 | 11.062 |
| H | 17.879 | 28.356 | 11.485 |
| H | 17.155 | 28.842 | 10.248 |
| O | 14.979 | 20.976 | 3.838  |
| H | 14.632 | 20.89  | 4.726  |
| H | 14.97  | 20.085 | 3.49   |
| O | 12.076 | 19.619 | 5.305  |
| H | 11.173 | 19.305 | 5.315  |
| H | 12.279 | 19.797 | 6.223  |
| O | 24.135 | 9.013  | 7.504  |
| H | 24.017 | 8.16   | 7.084  |
| H | 24.243 | 8.81   | 8.433  |

|   |        |        |        |
|---|--------|--------|--------|
| O | 20.533 | 7.791  | 9.143  |
| H | 21.058 | 7.108  | 8.727  |
| H | 20.768 | 7.744  | 10.07  |
| O | 14.962 | 26.232 | 10.749 |
| H | 15.29  | 27.119 | 10.896 |
| H | 14.02  | 26.344 | 10.621 |
| O | 23.608 | 12.845 | 5.112  |
| H | 23.199 | 12.399 | 5.853  |
| H | 23.459 | 12.261 | 4.369  |
| O | 12.377 | 19.602 | 8.232  |
| H | 13.164 | 19.429 | 8.749  |
| H | 12.059 | 20.445 | 8.555  |
| O | 18.977 | 18.775 | 3.888  |
| H | 18.348 | 18.072 | 3.726  |
| H | 18.599 | 19.27  | 4.615  |
| O | 25.472 | 8.397  | 29.959 |
| H | 25.162 | 7.627  | 29.481 |
| H | 26.374 | 8.516  | 29.662 |
| O | 22.287 | 10.099 | 32.457 |
| H | 21.46  | 10.028 | 32.934 |
| H | 22.923 | 9.649  | 33.012 |
| O | 23.166 | 10.212 | 29.633 |
| H | 23.016 | 10.028 | 30.561 |
| H | 23.982 | 9.755  | 29.427 |
| O | 21.656 | 8.536  | 27.858 |
| H | 20.705 | 8.617  | 27.786 |
| H | 21.897 | 9.152  | 28.549 |
| O | 20.104 | 6.795  | 25.015 |
| H | 20.145 | 6.764  | 24.059 |
| H | 19.476 | 7.492  | 25.204 |
| O | 21.823 | 4.798  | 23.765 |
| H | 22.025 | 4.211  | 23.036 |
| H | 21.345 | 5.523  | 23.363 |
| O | 19.611 | 5.653  | 27.727 |
| H | 19.863 | 6.067  | 26.902 |
| H | 18.656 | 5.606  | 27.69  |
| O | 16.545 | 12.364 | 33.541 |
| H | 16.979 | 13.211 | 33.433 |
| H | 16.058 | 12.239 | 32.727 |
| O | 22.582 | 8.671  | 21.629 |
| H | 22.293 | 7.763  | 21.724 |
| H | 23.441 | 8.695  | 22.051 |
| O | 19.672 | 12.13  | 20.083 |
| H | 18.909 | 11.736 | 19.661 |
| H | 19.929 | 11.496 | 20.753 |
| O | 25.745 | 8.456  | 19.464 |
| H | 26.1   | 7.602  | 19.219 |

|   |        |        |        |
|---|--------|--------|--------|
| H | 25.767 | 8.46   | 20.421 |
| O | 14.942 | 7.964  | 12.04  |
| H | 14.351 | 7.747  | 12.761 |
| H | 15.77  | 8.182  | 12.468 |
| O | 25.469 | 4.58   | 12.551 |
| H | 24.865 | 4.327  | 13.25  |
| H | 26.339 | 4.488  | 12.942 |
| O | 12.903 | 8.209  | 16.179 |
| H | 13.744 | 7.755  | 16.229 |
| H | 12.679 | 8.196  | 15.249 |
| O | 21.05  | 7.892  | 31.275 |
| H | 20.16  | 8.218  | 31.137 |
| H | 21.543 | 8.658  | 31.568 |
| O | 20.681 | 4.849  | 17.283 |
| H | 21.085 | 3.984  | 17.214 |
| H | 21.419 | 5.454  | 17.358 |
| O | 14.96  | 5.607  | 16.675 |
| H | 15.424 | 5.202  | 17.408 |
| H | 14.977 | 4.944  | 15.985 |
| O | 24.929 | 3.111  | 21.795 |
| H | 24.917 | 2.992  | 22.745 |
| H | 25.167 | 4.03   | 21.672 |
| O | 24.821 | 6.199  | 15.508 |
| H | 25.311 | 5.466  | 15.136 |
| H | 25.487 | 6.86   | 15.697 |
| O | 20.735 | 10.817 | 17.859 |
| H | 21.253 | 10.076 | 18.174 |
| H | 20.533 | 11.319 | 18.649 |
| O | 15.859 | 5.475  | 21.218 |
| H | 15.249 | 5.051  | 20.614 |
| H | 15.499 | 6.353  | 21.344 |
| O | 20.771 | 5.262  | 12.215 |
| H | 21.477 | 5.904  | 12.298 |
| H | 21.215 | 4.414  | 12.234 |
| O | 26.792 | 11.473 | 29.652 |
| H | 26.509 | 10.976 | 30.419 |
| H | 27.726 | 11.276 | 29.57  |
| O | 16.933 | 4.598  | 13.488 |
| H | 17.476 | 5.37   | 13.65  |
| H | 16.31  | 4.881  | 12.818 |
| O | 18.595 | 4.874  | 20.615 |
| H | 17.733 | 4.934  | 21.028 |
| H | 18.43  | 5.061  | 19.69  |
| O | 21.641 | 5.335  | 8.322  |
| H | 20.956 | 4.874  | 7.837  |
| H | 21.963 | 4.69   | 8.952  |
| O | 12.953 | 7.93   | 10.109 |

|   |        |       |        |
|---|--------|-------|--------|
| H | 13.588 | 7.892 | 10.824 |
| H | 12.94  | 7.042 | 9.752  |
| O | 18.496 | 3.178 | 11.406 |
| H | 18.224 | 3.555 | 12.242 |
| H | 18.84  | 3.92  | 10.908 |
| O | 22.777 | 7.188 | 13.749 |
| H | 23.243 | 6.495 | 14.218 |
| H | 22.565 | 7.833 | 14.424 |
| O | 16.939 | 5.794 | 26.44  |
| H | 16.577 | 4.923 | 26.601 |
| H | 17.047 | 5.837 | 25.49  |
| O | 21.614 | 1.321 | 20.076 |
| H | 20.826 | 1.184 | 19.551 |
| H | 21.514 | 2.205 | 20.431 |
| O | 31.542 | 4.771 | 23.447 |
| H | 31.094 | 3.938 | 23.3   |
| H | 32.441 | 4.613 | 23.159 |
| O | 23.139 | 3.281 | 9.665  |
| H | 23.681 | 2.631 | 9.217  |
| H | 23.748 | 3.748 | 10.237 |
| O | 22.325 | 8.632 | 18.507 |
| H | 23.08  | 9.21  | 18.608 |
| H | 21.889 | 8.655 | 19.359 |
| O | 15.022 | 8.21  | 21.62  |
| H | 15.405 | 8.711 | 22.34  |
| H | 14.179 | 8.633 | 21.456 |
| O | 23.142 | 5.674 | 20.23  |
| H | 23.876 | 6.209 | 20.531 |
| H | 23.16  | 5.756 | 19.277 |
| O | 15.285 | 3.703 | 25.366 |
| H | 14.592 | 4.302 | 25.088 |
| H | 14.938 | 2.831 | 25.175 |
| O | 13.642 | 6.459 | 29.19  |
| H | 13.072 | 6.541 | 28.425 |
| H | 13.48  | 7.256 | 29.695 |
| O | 21.637 | 2.564 | 12.113 |
| H | 21.388 | 1.645 | 12.019 |
| H | 21.886 | 2.836 | 11.23  |
| O | 17.461 | 8.619 | 13.175 |
| H | 17.91  | 8.001 | 13.751 |
| H | 17.992 | 9.414 | 13.216 |
| O | 31.544 | 8.965 | 24.418 |
| H | 31.384 | 9.851 | 24.091 |
| H | 32.103 | 8.562 | 23.753 |
| O | 13.141 | 8.738 | 30.71  |
| H | 12.558 | 9.463 | 30.484 |
| H | 12.915 | 8.522 | 31.615 |

|   |        |        |        |
|---|--------|--------|--------|
| O | 18.556 | 4.849  | 9.203  |
| H | 18.646 | 4.897  | 8.251  |
| H | 18.28  | 5.729  | 9.461  |
| O | 18.576 | 7.769  | 30.056 |
| H | 18.811 | 8.652  | 29.77  |
| H | 17.767 | 7.572  | 29.582 |
| O | 16.549 | 9.056  | 23.942 |
| H | 17.251 | 8.693  | 24.482 |
| H | 16.269 | 9.842  | 24.409 |
| O | 15.341 | 4.813  | 11.239 |
| H | 14.9   | 5.548  | 10.812 |
| H | 16.027 | 4.555  | 10.623 |
| O | 16.938 | 5.183  | 23.867 |
| H | 16.594 | 5.433  | 23.009 |
| H | 16.63  | 4.286  | 23.996 |
| O | 19.849 | 6.507  | 22.403 |
| H | 19.182 | 7.037  | 21.965 |
| H | 19.777 | 5.645  | 21.994 |
| O | 16.233 | 7.417  | 28.481 |
| H | 15.46  | 6.937  | 28.779 |
| H | 16.505 | 6.962  | 27.684 |
| O | 14.159 | 3.839  | 19.885 |
| H | 13.926 | 3.704  | 18.966 |
| H | 13.77  | 3.094  | 20.343 |
| O | 13.207 | 10.901 | 16.462 |
| H | 13.966 | 10.894 | 15.878 |
| H | 12.945 | 9.983  | 16.526 |
| O | 23.406 | 10.236 | 25.781 |
| H | 23.432 | 9.436  | 26.307 |
| H | 24.233 | 10.677 | 25.974 |
| O | 26.761 | 5.183  | 10.151 |
| H | 26.488 | 5.243  | 11.066 |
| H | 26.044 | 5.582  | 9.659  |
| O | 22.438 | 2.8    | 16.266 |
| H | 22.092 | 1.912  | 16.356 |
| H | 23.145 | 2.849  | 16.909 |
| O | 24.848 | 9.495  | 10.383 |
| H | 24.994 | 10.398 | 10.1   |
| H | 25.694 | 9.213  | 10.73  |
| O | 18.294 | 8.698  | 21.634 |
| H | 19.002 | 9.278  | 21.914 |
| H | 17.596 | 8.848  | 22.271 |
| O | 30.401 | 5.99   | 20.707 |
| H | 31.337 | 6.172  | 20.791 |
| H | 30.087 | 5.927  | 21.609 |
| O | 27.262 | 11.494 | 24.43  |
| H | 26.724 | 11.713 | 25.191 |

|   |        |        |        |
|---|--------|--------|--------|
| H | 27.418 | 10.553 | 24.51  |
| O | 16.553 | 11.125 | 27.716 |
| H | 16.055 | 10.917 | 26.925 |
| H | 16.725 | 12.064 | 27.651 |
| O | 18.636 | 14.472 | 19.061 |
| H | 19.069 | 13.674 | 19.365 |
| H | 18.005 | 14.68  | 19.751 |
| O | 26.295 | 5.941  | 18.23  |
| H | 25.431 | 5.529  | 18.237 |
| H | 26.908 | 5.213  | 18.332 |
| O | 17.242 | 11.293 | 18.992 |
| H | 17.164 | 10.418 | 18.613 |
| H | 16.411 | 11.72  | 18.781 |
| O | 12.88  | 6.997  | 13.606 |
| H | 11.954 | 7.209  | 13.484 |
| H | 12.911 | 6.041  | 13.588 |
| O | 19.435 | 3.691  | 24.066 |
| H | 18.86  | 4.443  | 24.203 |
| H | 20.319 | 4.041  | 24.182 |
| O | 16.393 | 10.343 | 7.185  |
| H | 15.564 | 10.221 | 7.648  |
| H | 17.052 | 9.971  | 7.771  |
| O | 15.596 | 3.233  | 15.249 |
| H | 15.054 | 2.598  | 14.781 |
| H | 15.998 | 3.76   | 14.559 |
| O | 26.97  | 8.357  | 5.414  |
| H | 27.478 | 8.981  | 4.896  |
| H | 26.506 | 8.898  | 6.053  |
| O | 11.883 | 15.87  | 9.605  |
| H | 12.188 | 16.476 | 10.28  |
| H | 11.015 | 16.195 | 9.365  |
| O | 24.408 | 5.797  | 8.197  |
| H | 24.597 | 4.874  | 8.027  |
| H | 23.453 | 5.857  | 8.155  |
| O | 10.105 | 6.966  | 13.376 |
| H | 9.583  | 7.713  | 13.084 |
| H | 9.494  | 6.429  | 13.881 |
| O | 28.455 | 2.576  | 12.437 |
| H | 29.256 | 2.052  | 12.414 |
| H | 28.719 | 3.397  | 12.852 |
| O | 13.611 | 12.388 | 5.838  |
| H | 13.832 | 13.156 | 6.364  |
| H | 12.667 | 12.28  | 5.957  |
| O | 24.303 | 15.474 | 8.769  |
| H | 24.325 | 16.277 | 8.249  |
| H | 25.183 | 15.403 | 9.137  |
| O | 10.345 | 24.772 | 26.483 |

|   |        |        |        |
|---|--------|--------|--------|
| H | 10.794 | 24.263 | 25.808 |
| H | 11.047 | 25.231 | 26.943 |
| O | 6.743  | 23.957 | 24.422 |
| H | 7.142  | 23.753 | 25.268 |
| H | 7.408  | 23.714 | 23.778 |
| O | 8.702  | 28.755 | 24.255 |
| H | 8.471  | 28.172 | 23.532 |
| H | 8.819  | 28.173 | 25.006 |
| O | 4.606  | 20.151 | 25.387 |
| H | 5.257  | 20.411 | 26.038 |
| H | 4.765  | 19.218 | 25.248 |
| O | 5.998  | 26.836 | 27.348 |
| H | 5.629  | 26.154 | 27.91  |
| H | 6.217  | 26.383 | 26.534 |
| O | 10.602 | 31.505 | 19.793 |
| H | 10.867 | 30.812 | 20.398 |
| H | 11.19  | 31.406 | 19.044 |
| O | 3.632  | 28.521 | 20.494 |
| H | 3.004  | 29.238 | 20.584 |
| H | 4.204  | 28.792 | 19.776 |
| O | 15.725 | 32.069 | 14.477 |
| H | 15.909 | 32.881 | 14.949 |
| H | 14.993 | 32.287 | 13.9   |
| O | 11.233 | 24.062 | 21.261 |
| H | 10.486 | 23.476 | 21.134 |
| H | 11.931 | 23.493 | 21.584 |
| O | 9.48   | 27.556 | 15.717 |
| H | 10.067 | 26.861 | 15.418 |
| H | 9.744  | 27.719 | 16.622 |
| O | 11.536 | 26.417 | 22.465 |
| H | 10.698 | 26.726 | 22.807 |
| H | 11.308 | 25.667 | 21.915 |
| O | 7.942  | 27.289 | 21.811 |
| H | 7.106  | 26.846 | 21.668 |
| H | 7.809  | 28.17  | 21.461 |
| O | 8.065  | 29.45  | 19.317 |
| H | 8.059  | 30.407 | 19.313 |
| H | 7.166  | 29.204 | 19.098 |
| O | 12.427 | 28.253 | 11.606 |
| H | 12.447 | 27.435 | 12.103 |
| H | 13.199 | 28.734 | 11.905 |
| O | 7.57   | 23.724 | 19.557 |
| H | 6.861  | 23.086 | 19.479 |
| H | 7.503  | 24.255 | 18.763 |
| O | 5.349  | 29.145 | 18.434 |
| H | 5.198  | 28.382 | 17.877 |
| H | 4.992  | 29.88  | 17.937 |

|   |        |        |        |
|---|--------|--------|--------|
| O | 2.42   | 25.93  | 22.193 |
| H | 3.271  | 26.149 | 21.814 |
| H | 2.52   | 26.11  | 23.128 |
| O | 14.853 | 24.985 | 32.463 |
| H | 15.796 | 24.817 | 32.475 |
| H | 14.649 | 25.137 | 31.54  |
| O | 5.186  | 26.955 | 22.474 |
| H | 4.794  | 27.671 | 21.974 |
| H | 5.111  | 27.232 | 23.387 |
| O | 9.217  | 30.922 | 16.985 |
| H | 10.12  | 30.695 | 16.763 |
| H | 9.07   | 30.515 | 17.839 |
| O | 9.281  | 21.829 | 21.265 |
| H | 8.698  | 22.45  | 20.829 |
| H | 9.496  | 21.187 | 20.588 |
| O | 10.03  | 27.47  | 19.351 |
| H | 9.481  | 28.238 | 19.507 |
| H | 9.7    | 26.811 | 19.962 |
| O | 13.439 | 29.575 | 22.515 |
| H | 14.23  | 29.153 | 22.849 |
| H | 13.406 | 30.417 | 22.97  |
| O | 5.894  | 28.09  | 12.91  |
| H | 6.124  | 28.955 | 13.251 |
| H | 5.904  | 28.198 | 11.959 |
| O | 4.404  | 21.97  | 30.287 |
| H | 5.338  | 22.164 | 30.361 |
| H | 3.989  | 22.826 | 30.181 |
| O | 9.389  | 9.913  | 29.44  |
| H | 10.315 | 10.145 | 29.37  |
| H | 8.94   | 10.751 | 29.546 |
| O | 6.125  | 16.796 | 31.663 |
| H | 6.387  | 16.525 | 32.543 |
| H | 5.205  | 17.044 | 31.753 |
| O | 7.242  | 22.664 | 30.659 |
| H | 7.301  | 21.799 | 31.065 |
| H | 7.797  | 23.222 | 31.204 |
| O | 8.322  | 22.971 | 26.654 |
| H | 7.712  | 23.213 | 27.351 |
| H | 8.996  | 23.651 | 26.679 |
| O | 7.694  | 13.829 | 26.977 |
| H | 6.99   | 13.731 | 26.335 |
| H | 8.345  | 14.375 | 26.537 |
| O | 7.121  | 15.997 | 28.933 |
| H | 6.785  | 15.262 | 28.42  |
| H | 6.596  | 15.99  | 29.733 |
| O | 3.119  | 18.475 | 18.734 |
| H | 3.746  | 17.906 | 18.288 |



|   |        |        |        |
|---|--------|--------|--------|
| H | 2.54   | 18.786 | 18.038 |
| O | 8.495  | 8.206  | 19.487 |
| H | 9.292  | 8.272  | 18.961 |
| H | 8.139  | 7.343  | 19.276 |
| O | 8.48   | 19.274 | 32.209 |
| H | 7.707  | 19.438 | 32.749 |
| H | 9.123  | 19.915 | 32.51  |
| O | 4.097  | 19.322 | 28.952 |
| H | 4.788  | 19.211 | 28.3   |
| H | 4.032  | 20.269 | 29.074 |
| O | 7.118  | 8.55   | 22.881 |
| H | 7.965  | 8.684  | 23.306 |
| H | 7.173  | 9.058  | 22.072 |
| O | 3.798  | 21.594 | 23.096 |
| H | 3.677  | 20.919 | 22.428 |
| H | 4.474  | 21.241 | 23.674 |
| O | 1.708  | 18.856 | 27.048 |
| H | 1.092  | 18.274 | 27.495 |
| H | 2.199  | 19.273 | 27.756 |
| O | 19.124 | 16.275 | 29.635 |
| H | 19.402 | 15.702 | 30.349 |
| H | 19.934 | 16.501 | 29.179 |
| O | 7.147  | 9.499  | 26.21  |
| H | 6.598  | 8.782  | 25.894 |
| H | 7.238  | 9.336  | 27.149 |
| O | 0.543  | 16.788 | 22.555 |
| H | 0.179  | 17.376 | 23.216 |
| H | -0.1   | 16.798 | 21.845 |
| O | 11.99  | 9.548  | 24.076 |
| H | 11.727 | 10.048 | 23.304 |
| H | 11.218 | 9.557  | 24.642 |
| O | 12.544 | 23.066 | 34.472 |
| H | 12.227 | 23.41  | 33.637 |
| H | 13.492 | 23.2   | 34.442 |
| O | 11.833 | 10.956 | 29.762 |
| H | 12.33  | 11.567 | 30.306 |
| H | 11.999 | 11.243 | 28.865 |
| O | 11.687 | 17.244 | 31.975 |
| H | 11.846 | 17.457 | 31.055 |
| H | 10.755 | 17.029 | 32.013 |
| O | 0.501  | 21.367 | 16.215 |
| H | -0.249 | 21.63  | 15.683 |
| H | 0.118  | 21.07  | 17.04  |
| O | 10.627 | 16.069 | 14.79  |
| H | 10.043 | 16.794 | 15.01  |
| H | 11.485 | 16.478 | 14.678 |
| O | 7.258  | 25.223 | 17.33  |

|   |        |        |        |
|---|--------|--------|--------|
| H | 7.475  | 26.051 | 17.759 |
| H | 6.914  | 25.48  | 16.474 |
| O | 3.771  | 27.314 | 16.874 |
| H | 3.12   | 27.873 | 16.45  |
| H | 3.268  | 26.572 | 17.21  |
| O | 7.461  | 13.033 | 12.694 |
| H | 7.663  | 12.851 | 11.777 |
| H | 7.797  | 12.273 | 13.17  |
| O | 4.969  | 14.157 | 19.343 |
| H | 5.51   | 14.933 | 19.496 |
| H | 5.238  | 13.844 | 18.479 |
| O | 5.269  | 16.773 | 17.728 |
| H | 5.056  | 17.109 | 16.857 |
| H | 5.421  | 15.838 | 17.593 |
| O | 6.669  | 17.421 | 14.285 |
| H | 5.782  | 17.404 | 14.643 |
| H | 7.076  | 16.619 | 14.614 |
| O | 3.784  | 19.597 | 21.196 |
| H | 3.605  | 19.147 | 20.371 |
| H | 3.726  | 18.91  | 21.861 |
| O | 3.905  | 17.383 | 12.472 |
| H | 4.436  | 16.586 | 12.481 |
| H | 4.476  | 18.055 | 12.844 |
| O | 6.793  | 20.993 | 16.992 |
| H | 7.708  | 21.26  | 17.083 |
| H | 6.708  | 20.232 | 17.566 |
| O | 10.889 | 20.232 | 15.06  |
| H | 10.994 | 20.785 | 14.286 |
| H | 11.766 | 20.18  | 15.439 |
| O | 6.589  | 20.397 | 27.023 |
| H | 7.251  | 21.087 | 27.054 |
| H | 6.629  | 19.987 | 27.887 |
| O | 9.581  | 23.657 | 7.735  |
| H | 8.647  | 23.449 | 7.725  |
| H | 9.693  | 24.292 | 7.027  |
| O | 10.311 | 13.591 | 14.341 |
| H | 11.167 | 13.391 | 13.961 |
| H | 10.27  | 14.547 | 14.347 |
| O | 22.708 | 27.764 | 19.976 |
| H | 23.029 | 28.05  | 20.831 |
| H | 21.756 | 27.738 | 20.074 |
| O | -0.206 | 17.112 | 19.964 |
| H | -0.972 | 17.412 | 19.474 |
| H | 0.313  | 17.904 | 20.105 |
| O | 1.962  | 21.501 | 25.597 |
| H | 2.79   | 21.096 | 25.337 |
| H | 1.505  | 20.818 | 26.087 |

|   |        |        |        |
|---|--------|--------|--------|
| O | 6.059  | 26.458 | 15.133 |
| H | 6.193  | 27.093 | 14.43  |
| H | 5.346  | 26.826 | 15.655 |
| O | 2.22   | 19.398 | 16.242 |
| H | 2.93   | 20.007 | 16.038 |
| H | 1.421  | 19.898 | 16.078 |
| O | 15.493 | 21.324 | 26.146 |
| H | 15.28  | 22.159 | 25.728 |
| H | 15.233 | 21.441 | 27.059 |
| O | 4.397  | 14.864 | 26.829 |
| H | 4.099  | 14.296 | 26.118 |
| H | 3.934  | 14.542 | 27.603 |
| O | 1.231  | 14.122 | 21.62  |
| H | 2.085  | 14.173 | 22.051 |
| H | 0.684  | 14.746 | 22.097 |
| O | 4.572  | 17.526 | 26.449 |
| H | 4.46   | 16.583 | 26.567 |
| H | 3.879  | 17.918 | 26.982 |
| O | 0.663  | 14.711 | 19.07  |
| H | 1.194  | 14.411 | 19.808 |
| H | 0.299  | 15.546 | 19.362 |
| O | 9.923  | 11.473 | 21.452 |
| H | 10.413 | 11.212 | 20.673 |
| H | 10.595 | 11.737 | 22.08  |
| O | 9.436  | 21.342 | 17.242 |
| H | 9.867  | 22.169 | 17.025 |
| H | 9.86   | 20.696 | 16.678 |
| O | 0.21   | 18.485 | 24.775 |
| H | -0.489 | 19.116 | 24.947 |
| H | 0.771  | 18.534 | 25.549 |
| O | 0.843  | 21.235 | 22.914 |
| H | 1.288  | 21.945 | 22.451 |
| H | 1.186  | 21.28  | 23.806 |
| O | 6.216  | 20.945 | 14.084 |
| H | 5.983  | 20.699 | 14.979 |
| H | 6.268  | 21.9   | 14.103 |
| O | 12.158 | 18.656 | 26.6   |
| H | 11.225 | 18.793 | 26.439 |
| H | 12.596 | 19.249 | 25.989 |
| O | 10.421 | 24.811 | 14.196 |
| H | 10.087 | 25.32  | 13.456 |
| H | 11.367 | 24.955 | 14.177 |
| O | 13.184 | 21.666 | 21.343 |
| H | 13.397 | 20.762 | 21.574 |
| H | 12.751 | 21.6   | 20.492 |
| O | 4.004  | 23.979 | 24.467 |
| H | 4.953  | 24.109 | 24.476 |

|   |        |        |        |
|---|--------|--------|--------|
| H | 3.884  | 23.118 | 24.067 |
| O | 16.458 | 16.79  | 6.819  |
| H | 16.051 | 17.121 | 6.019  |
| H | 17.349 | 16.558 | 6.557  |
| O | 8.511  | 15.399 | 24.713 |
| H | 8.957  | 16.163 | 24.349 |
| H | 7.882  | 15.144 | 24.038 |
| O | 8.856  | 11.454 | 17.814 |
| H | 9.752  | 11.453 | 18.151 |
| H | 8.62   | 12.381 | 17.765 |
| O | 11.364 | 11.877 | 18.304 |
| H | 11.246 | 12.788 | 18.033 |
| H | 12.181 | 11.607 | 17.884 |
| O | 2.885  | 21.121 | 13.352 |
| H | 3.436  | 21.175 | 14.133 |
| H | 2.753  | 22.032 | 13.088 |
| O | 11.853 | 25.183 | 18.281 |
| H | 11.887 | 24.91  | 19.198 |
| H | 11.671 | 26.122 | 18.318 |
| O | 6.652  | 23.165 | 7.563  |
| H | 5.94   | 23.625 | 7.117  |
| H | 6.424  | 22.239 | 7.486  |
| O | 6.307  | 20.313 | 6.796  |
| H | 5.732  | 20.347 | 7.561  |
| H | 7.167  | 20.091 | 7.153  |
| O | 5.727  | 16.408 | 23.623 |
| H | 4.838  | 16.737 | 23.752 |
| H | 6.176  | 16.598 | 24.447 |
| O | 5.582  | 11.634 | 25.208 |
| H | 5.295  | 11.249 | 24.379 |
| H | 6.379  | 11.152 | 25.432 |
| O | 8.719  | 11.419 | 14.191 |
| H | 8.544  | 10.991 | 15.029 |
| H | 9.495  | 11.956 | 14.354 |
| O | 6.273  | 23.876 | 28.295 |
| H | 5.336  | 24.071 | 28.309 |
| H | 6.473  | 23.596 | 29.188 |
| O | 7.502  | 15.379 | 6.721  |
| H | 7.356  | 16.087 | 6.093  |
| H | 8.428  | 15.158 | 6.621  |
| O | 6.503  | 23.859 | 13.896 |
| H | 7.332  | 23.712 | 14.352 |
| H | 6.243  | 24.744 | 14.152 |
| O | 13.069 | 12.808 | 13.633 |
| H | 13.689 | 12.119 | 13.395 |
| H | 13.468 | 13.241 | 14.388 |
| O | 6.632  | 18.898 | 19.134 |

|   |        |        |        |
|---|--------|--------|--------|
| H | 6.882  | 18.464 | 19.949 |
| H | 6.162  | 18.226 | 18.64  |
| O | 4.124  | 21.273 | 16.129 |
| H | 3.35   | 21.534 | 16.628 |
| H | 4.86   | 21.629 | 16.627 |
| O | 10.827 | 15.006 | 21.802 |
| H | 11.27  | 15.512 | 21.121 |
| H | 10.502 | 15.664 | 22.417 |
| O | 11.4   | 11.911 | 26.723 |
| H | 12.157 | 12.312 | 27.149 |
| H | 11.041 | 12.605 | 26.17  |
| O | 3.261  | 17.644 | 23.186 |
| H | 2.591  | 17.011 | 22.925 |
| H | 2.892  | 18.08  | 23.954 |
| O | 8.779  | 9.041  | 16.468 |
| H | 9.601  | 8.686  | 16.807 |
| H | 8.641  | 9.844  | 16.97  |
| O | 11.083 | 14.387 | 17.521 |
| H | 10.829 | 15.24  | 17.873 |
| H | 11.042 | 14.498 | 16.572 |
| O | 5.413  | 14.961 | 12.896 |
| H | 5.8    | 14.634 | 12.084 |
| H | 6.119  | 15.452 | 13.317 |
| O | 13.664 | 10.862 | 21.141 |
| H | 13.498 | 10.818 | 20.199 |
| H | 13.795 | 11.794 | 21.317 |
| O | 8.069  | 13.676 | 10.149 |
| H | 7.756  | 14.578 | 10.086 |
| H | 8.456  | 13.497 | 9.292  |
| O | 10.412 | 23.596 | 16.652 |
| H | 10.728 | 24.219 | 17.306 |
| H | 10.385 | 24.097 | 15.837 |
| O | 7.234  | 18.164 | 22.144 |
| H | 7.628  | 18.837 | 22.698 |
| H | 6.779  | 17.586 | 22.756 |
| O | 3.627  | 10.43  | 19.518 |
| H | 4.527  | 10.501 | 19.2   |
| H | 3.137  | 11.062 | 18.991 |
| O | 2.237  | 25.187 | 17.955 |
| H | 2.404  | 24.257 | 18.109 |
| H | 1.633  | 25.202 | 17.212 |
| O | 5.534  | 13.837 | 16.786 |
| H | 6.369  | 13.912 | 16.323 |
| H | 4.893  | 13.663 | 16.096 |
| O | 3.976  | 13.497 | 14.707 |
| H | 4.316  | 14.117 | 14.062 |
| H | 3.096  | 13.285 | 14.395 |

|   |        |        |        |
|---|--------|--------|--------|
| O | 9.675  | 23.694 | 10.775 |
| H | 9.012  | 23.8   | 10.092 |
| H | 9.783  | 24.572 | 11.142 |
| O | 5.391  | 21.911 | 19.72  |
| H | 5.166  | 21.406 | 20.501 |
| H | 5.839  | 21.286 | 19.15  |
| O | 12.569 | 24.472 | 7.065  |
| H | 12.548 | 24.004 | 6.23   |
| H | 12.711 | 25.387 | 6.823  |
| O | 14.777 | 24.405 | 4.634  |
| H | 14.044 | 25.004 | 4.5    |
| H | 14.368 | 23.581 | 4.9    |
| O | 12.741 | 18.302 | 11.121 |
| H | 11.822 | 18.561 | 11.053 |
| H | 13.228 | 19.063 | 10.804 |
| O | 1.5    | 18.804 | 12.493 |
| H | 2.136  | 18.091 | 12.448 |
| H | 2.028  | 19.587 | 12.65  |
| O | 5.821  | 22.106 | 11.546 |
| H | 6.054  | 21.497 | 12.247 |
| H | 5.888  | 22.972 | 11.949 |
| O | 5.855  | 18.556 | 9.479  |
| H | 5.073  | 18.545 | 8.927  |
| H | 5.735  | 19.315 | 10.049 |
| O | 2.897  | 22.367 | 18.607 |
| H | 2.381  | 22.61  | 19.376 |
| H | 3.805  | 22.41  | 18.905 |
| O | 9.658  | 11.537 | 32.303 |
| H | 9.931  | 12.423 | 32.541 |
| H | 10.377 | 11.199 | 31.77  |
| O | 12.931 | 3.273  | 17.436 |
| H | 12.703 | 3.692  | 16.607 |
| H | 12.125 | 3.307  | 17.951 |
| O | 2.558  | 12.333 | 18.335 |
| H | 3.227  | 13.006 | 18.461 |
| H | 1.729  | 12.788 | 18.484 |
| O | 4.807  | 11.141 | 12.472 |
| H | 5.275  | 11.949 | 12.681 |
| H | 5.358  | 10.445 | 12.831 |
| O | 6.717  | 9.08   | 11.526 |
| H | 7.552  | 9.269  | 11.955 |
| H | 6.757  | 9.563  | 10.701 |
| O | 8.687  | 16.129 | 12.3   |
| H | 8.632  | 16.325 | 11.364 |
| H | 8.437  | 15.207 | 12.366 |
| O | 10.657 | 7.817  | 17.783 |
| H | 10.612 | 6.874  | 17.626 |

|   |        |        |        |
|---|--------|--------|--------|
| H | 11.563 | 8.05   | 17.581 |
| O | 4.919  | 11.137 | 22.608 |
| H | 5.588  | 10.882 | 21.972 |
| H | 4.279  | 11.632 | 22.097 |
| O | 14.027 | 13.954 | 10.726 |
| H | 13.286 | 14.48  | 10.426 |
| H | 13.64  | 13.308 | 11.316 |
| O | 4.941  | 10.54  | 15.659 |
| H | 4.883  | 10.595 | 16.613 |
| H | 4.572  | 11.367 | 15.349 |
| O | 6.883  | 16.082 | 9.474  |
| H | 6.474  | 16.936 | 9.614  |
| H | 6.708  | 15.881 | 8.554  |
| O | 6.333  | 11.028 | 9.802  |
| H | 5.588  | 11.333 | 9.284  |
| H | 6.387  | 11.646 | 10.53  |

**Table S19. PYP chromophore + 790 waters**

| Method    | Time(s) | iterations | E(eV) | f   |
|-----------|---------|------------|-------|-----|
| CIS       | 4504.1  | 12         | 3.65  | 1.6 |
| TD-BLYP   | -       | -          | -     | -   |
| TD-B3LYP* | 1113.7  | 2          | 0.80  | 0.0 |

\*residual norm converged to only 0.0006

|   |        |        |        |
|---|--------|--------|--------|
| C | 22.967 | 16.81  | 19.507 |
| C | 24.27  | 16.774 | 18.931 |
| C | 24.617 | 15.671 | 18.139 |
| C | 23.681 | 14.66  | 17.949 |
| C | 22.419 | 14.608 | 18.558 |
| C | 22.092 | 15.731 | 19.368 |
| S | 22.3   | 18.226 | 20.373 |
| C | 21.107 | 18.737 | 19.24  |
| C | 19.881 | 18.611 | 19.724 |
| O | 21.503 | 18.978 | 18.056 |
| C | 18.678 | 18.857 | 18.895 |
| C | 17.412 | 18.7   | 19.379 |
| C | 16.267 | 18.768 | 18.424 |
| C | 15.007 | 18.753 | 18.949 |
| C | 14.627 | 18.622 | 20.339 |
| C | 15.744 | 18.498 | 21.241 |
| C | 17.075 | 18.511 | 20.793 |
| O | 13.416 | 18.649 | 20.62  |
| H | 25.016 | 17.532 | 19.156 |
| H | 25.561 | 15.727 | 17.603 |
| H | 23.959 | 13.891 | 17.234 |
| H | 21.774 | 13.742 | 18.433 |
| H | 21.138 | 15.665 | 19.885 |
| H | 19.762 | 18.159 | 20.708 |
| H | 18.901 | 19.227 | 17.895 |
| H | 16.528 | 18.974 | 17.391 |
| H | 14.139 | 18.825 | 18.303 |
| H | 15.6   | 18.345 | 22.305 |
| H | 17.886 | 18.502 | 21.514 |
| O | 29.51  | 28.373 | 25.52  |
| H | 29.611 | 29.237 | 25.919 |
| H | 30.004 | 27.785 | 26.093 |
| O | 29.914 | 28.662 | 20.051 |
| H | 28.96  | 28.597 | 20.094 |
| H | 30.203 | 28.55  | 20.956 |
| O | 28.022 | 19.477 | 33.619 |
| H | 28.041 | 19.045 | 32.765 |
| H | 27.758 | 18.789 | 34.229 |
| O | 24.698 | 32.706 | 19.971 |
| H | 25.394 | 32.886 | 19.339 |



|   |        |        |        |
|---|--------|--------|--------|
| H | 24.901 | 33.269 | 20.718 |
| O | 33.619 | 26.143 | 13.581 |
| H | 34.206 | 26.555 | 14.215 |
| H | 33.074 | 25.557 | 14.105 |
| O | 37.086 | 24.833 | 16.188 |
| H | 36.76  | 24.222 | 15.527 |
| H | 36.637 | 25.656 | 15.995 |
| O | 35.36  | 27.523 | 15.628 |
| H | 34.791 | 27.638 | 16.389 |
| H | 35.762 | 28.383 | 15.497 |
| O | 35.282 | 28.206 | 21.415 |
| H | 34.436 | 27.915 | 21.756 |
| H | 35.828 | 27.42  | 21.425 |
| O | 29.182 | 25.39  | 22.779 |
| H | 29.281 | 25.376 | 23.731 |
| H | 28.342 | 25.825 | 22.632 |
| O | 27.666 | 29.01  | 16.826 |
| H | 26.744 | 28.833 | 17.014 |
| H | 28.124 | 28.779 | 17.634 |
| O | 29.551 | 22.926 | 11.032 |
| H | 30.104 | 23.7   | 10.923 |
| H | 29.77  | 22.597 | 11.904 |
| O | 25.88  | 25.718 | 28.046 |
| H | 25.602 | 26.061 | 28.895 |
| H | 25.875 | 24.767 | 28.158 |
| O | 33.894 | 22.795 | 16.377 |
| H | 34.33  | 22.95  | 17.215 |
| H | 33.272 | 22.09  | 16.558 |
| O | 30.112 | 21.211 | 18.047 |
| H | 30.308 | 22.125 | 18.252 |
| H | 29.292 | 21.246 | 17.554 |
| O | 20.126 | 33.539 | 20.94  |
| H | 19.734 | 34.225 | 21.481 |
| H | 20.662 | 34.013 | 20.304 |
| O | 19.885 | 32.771 | 12.143 |
| H | 20.771 | 32.669 | 11.795 |
| H | 19.349 | 32.984 | 11.379 |
| O | 29.311 | 29.116 | 11.863 |
| H | 29.862 | 29.614 | 12.467 |
| H | 29.085 | 28.321 | 12.346 |
| O | 32.027 | 24.623 | 10.821 |
| H | 32.335 | 24.527 | 11.722 |
| H | 32.71  | 24.214 | 10.289 |
| O | 22.739 | 27.389 | 5.844  |
| H | 22.093 | 26.689 | 5.936  |
| H | 23.584 | 26.939 | 5.866  |
| O | 30.25  | 23.229 | 6.634  |

|   |        |        |        |
|---|--------|--------|--------|
| H | 30.147 | 24.042 | 7.129  |
| H | 29.37  | 22.856 | 6.598  |
| O | 24.075 | 15.499 | 29.422 |
| H | 24.789 | 14.887 | 29.603 |
| H | 23.281 | 15.008 | 29.631 |
| O | 25.931 | 16.537 | 32.89  |
| H | 26.584 | 16.212 | 33.509 |
| H | 25.185 | 15.946 | 32.996 |
| O | 32.393 | 16.843 | 31.041 |
| H | 31.962 | 16.242 | 31.649 |
| H | 33.317 | 16.817 | 31.293 |
| O | 26.423 | 14.107 | 29.296 |
| H | 26.561 | 13.165 | 29.395 |
| H | 26.809 | 14.318 | 28.445 |
| O | 27.383 | 22.332 | 28.542 |
| H | 28.134 | 22.88  | 28.772 |
| H | 27.568 | 21.487 | 28.951 |
| O | 25.825 | 17.56  | 30.061 |
| H | 25.435 | 16.932 | 29.452 |
| H | 25.968 | 17.058 | 30.863 |
| O | 28.391 | 13.11  | 22.223 |
| H | 29.252 | 12.971 | 21.829 |
| H | 28.33  | 12.444 | 22.907 |
| O | 32.048 | 27.128 | 24.603 |
| H | 32.977 | 27.306 | 24.748 |
| H | 31.858 | 26.375 | 25.162 |
| O | 30.871 | 21.739 | 29.017 |
| H | 31.739 | 21.702 | 29.418 |
| H | 30.266 | 21.566 | 29.739 |
| O | 29.874 | 10.396 | 28.124 |
| H | 29.975 | 11.045 | 27.428 |
| H | 30.526 | 9.725  | 27.923 |
| O | 31.475 | 22.004 | 26.329 |
| H | 31.137 | 21.63  | 27.143 |
| H | 31.181 | 21.401 | 25.647 |
| O | 32.047 | 19.635 | 31.966 |
| H | 31.894 | 18.846 | 31.447 |
| H | 32.999 | 19.734 | 31.977 |
| O | 38.553 | 23.44  | 20.941 |
| H | 37.923 | 24.02  | 20.513 |
| H | 38.935 | 23.973 | 21.638 |
| O | 29.037 | 17.929 | 31.606 |
| H | 28.779 | 17.008 | 31.567 |
| H | 28.694 | 18.308 | 30.797 |
| O | 34.454 | 8.83   | 23.885 |
| H | 34.391 | 8.547  | 22.973 |
| H | 34.633 | 9.769  | 23.833 |

|   |        |        |        |
|---|--------|--------|--------|
| O | 31.852 | 17.267 | 28.442 |
| H | 32.534 | 17.817 | 28.058 |
| H | 32.119 | 17.156 | 29.355 |
| O | 35.835 | 11.509 | 27.426 |
| H | 34.934 | 11.824 | 27.351 |
| H | 35.947 | 10.922 | 26.678 |
| O | 29.307 | 17.709 | 27.704 |
| H | 30.224 | 17.766 | 27.973 |
| H | 29.295 | 18.067 | 26.817 |
| O | 33.709 | 17.406 | 9.427  |
| H | 34.618 | 17.29  | 9.703  |
| H | 33.76  | 17.531 | 8.48   |
| O | 24.938 | 16.847 | 11.925 |
| H | 24.601 | 17.235 | 12.732 |
| H | 25.689 | 16.325 | 12.206 |
| O | 32.469 | 14.752 | 21.385 |
| H | 33.348 | 14.759 | 21.766 |
| H | 32.195 | 13.836 | 21.431 |
| O | 30.816 | 19.132 | 13.418 |
| H | 30.974 | 18.346 | 13.94  |
| H | 31.54  | 19.153 | 12.792 |
| O | 30.284 | 15.257 | 11.884 |
| H | 31.234 | 15.279 | 11.994 |
| H | 30.077 | 14.33  | 11.768 |
| O | 36.186 | 20.699 | 18.464 |
| H | 36.55  | 20.393 | 19.295 |
| H | 35.267 | 20.432 | 18.492 |
| O | 32.263 | 11.353 | 17.063 |
| H | 32.41  | 10.514 | 17.499 |
| H | 31.311 | 11.441 | 17.027 |
| O | 33.28  | 18.588 | 15.193 |
| H | 33.815 | 17.822 | 15.401 |
| H | 32.532 | 18.235 | 14.713 |
| O | 33.563 | 9.022  | 21.216 |
| H | 34.106 | 9.499  | 20.588 |
| H | 32.971 | 8.501  | 20.675 |
| O | 26.315 | 12.269 | 19.428 |
| H | 25.586 | 12.142 | 20.035 |
| H | 26.005 | 11.901 | 18.601 |
| O | 24.721 | 18.014 | 7.559  |
| H | 23.933 | 18.514 | 7.772  |
| H | 25.27  | 18.627 | 7.07   |
| O | 29.689 | 10.354 | 19.041 |
| H | 30.009 | 9.628  | 18.504 |
| H | 28.925 | 10.684 | 18.568 |
| O | 31.465 | 16.672 | 14.469 |
| H | 32.168 | 16.029 | 14.378 |

|   |        |        |        |
|---|--------|--------|--------|
| H | 30.721 | 16.168 | 14.799 |
| O | 34.923 | 10.571 | 19.564 |
| H | 35.348 | 10.322 | 18.743 |
| H | 35.619 | 10.977 | 20.08  |
| O | 38.527 | 15.458 | 13.427 |
| H | 37.971 | 14.933 | 14.002 |
| H | 38.738 | 14.874 | 12.699 |
| O | 30.751 | 18.966 | 19.536 |
| H | 30.85  | 19.768 | 19.022 |
| H | 29.824 | 18.742 | 19.454 |
| O | 35.482 | 20.719 | 24.898 |
| H | 35.54  | 21.194 | 24.069 |
| H | 34.566 | 20.446 | 24.954 |
| O | 21.624 | 17.545 | 15.698 |
| H | 21.844 | 17.862 | 16.574 |
| H | 21.068 | 18.23  | 15.328 |
| O | 27.301 | 20.143 | 19.909 |
| H | 26.457 | 20.142 | 19.458 |
| H | 27.68  | 19.287 | 19.713 |
| O | 28.39  | 27.497 | 9.419  |
| H | 28.841 | 28.199 | 9.888  |
| H | 28.061 | 26.921 | 10.11  |
| O | 30.133 | 25.377 | 8.495  |
| H | 30.881 | 25.33  | 9.09   |
| H | 29.936 | 26.312 | 8.431  |
| O | 32.002 | 10.998 | 22.33  |
| H | 32.425 | 10.517 | 21.619 |
| H | 31.574 | 11.737 | 21.899 |
| O | 29.855 | 14.696 | 24.663 |
| H | 29.947 | 14.331 | 23.783 |
| H | 29.069 | 15.241 | 24.615 |
| O | 31.889 | 16.56  | 19.452 |
| H | 32.012 | 16.092 | 20.278 |
| H | 31.432 | 17.364 | 19.699 |
| O | 27.763 | 8.742  | 24.655 |
| H | 27.349 | 7.971  | 25.04  |
| H | 28.329 | 8.392  | 23.967 |
| O | 34.644 | 10.558 | 9.453  |
| H | 35.402 | 10.214 | 8.98   |
| H | 33.93  | 9.961  | 9.231  |
| O | 37.732 | 9.429  | 18.503 |
| H | 38.216 | 9.367  | 19.327 |
| H | 38.329 | 9.07   | 17.847 |
| O | 30.544 | 12.556 | 20.427 |
| H | 30.218 | 11.819 | 19.909 |
| H | 30.792 | 13.214 | 19.777 |
| O | 34.526 | 20.736 | 7.123  |

|   |        |        |        |
|---|--------|--------|--------|
| H | 34.765 | 21.156 | 6.297  |
| H | 33.854 | 20.098 | 6.882  |
| O | 32.612 | 20.608 | 17.136 |
| H | 31.709 | 20.388 | 17.362 |
| H | 32.89  | 19.906 | 16.547 |
| O | 28.345 | 21.116 | 22.423 |
| H | 29.083 | 21.585 | 22.033 |
| H | 27.883 | 20.733 | 21.678 |
| O | 37.856 | 19.551 | 20.509 |
| H | 37.953 | 19.844 | 21.415 |
| H | 38.75  | 19.529 | 20.167 |
| O | 28.626 | 7.578  | 18.14  |
| H | 29.131 | 7.399  | 18.934 |
| H | 27.944 | 6.906  | 18.134 |
| O | 34.025 | 19.389 | 20.825 |
| H | 33.18  | 19.249 | 21.253 |
| H | 33.999 | 18.825 | 20.053 |
| O | 24.737 | 20.209 | 19.019 |
| H | 24.671 | 20.885 | 18.345 |
| H | 23.926 | 19.706 | 18.934 |
| O | 24.407 | 14.872 | 14.057 |
| H | 23.679 | 14.548 | 14.587 |
| H | 24.691 | 15.67  | 14.502 |
| O | 27.84  | 14.376 | 19.85  |
| H | 27.952 | 14.292 | 20.797 |
| H | 27.401 | 13.566 | 19.588 |
| O | 29.304 | 15.125 | 15.496 |
| H | 29.712 | 15.071 | 16.36  |
| H | 28.974 | 14.241 | 15.332 |
| O | 30.935 | 23.768 | 18.813 |
| H | 31.045 | 24.586 | 19.299 |
| H | 31.712 | 23.253 | 19.032 |
| O | 22.565 | 11.422 | 7.263  |
| H | 21.77  | 10.969 | 6.982  |
| H | 23.22  | 10.729 | 7.341  |
| O | 33.966 | 14.561 | 9.506  |
| H | 33.515 | 15.401 | 9.592  |
| H | 34.874 | 14.796 | 9.311  |
| O | 30.88  | 7.56   | 16.768 |
| H | 29.99  | 7.73   | 17.076 |
| H | 30.996 | 6.616  | 16.879 |
| O | 29.02  | 27.364 | 13.686 |
| H | 29.65  | 27.404 | 14.405 |
| H | 28.385 | 26.702 | 13.96  |
| O | 33.543 | 13.762 | 29.261 |
| H | 33.839 | 14.591 | 29.636 |
| H | 33.78  | 13.104 | 29.915 |

|   |        |        |        |
|---|--------|--------|--------|
| O | 30.268 | 23.047 | 21.979 |
| H | 31.187 | 23.245 | 21.797 |
| H | 29.889 | 23.888 | 22.238 |
| O | 27.648 | 21.192 | 16.796 |
| H | 27.35  | 20.499 | 16.206 |
| H | 26.861 | 21.705 | 16.979 |
| O | 29.094 | 23.158 | 15.712 |
| H | 28.684 | 22.32  | 15.928 |
| H | 29.846 | 22.923 | 15.168 |
| O | 34.864 | 20.878 | 14.109 |
| H | 35.24  | 20.289 | 13.454 |
| H | 34.281 | 20.321 | 14.625 |
| O | 33.093 | 26.646 | 22.107 |
| H | 32.438 | 26.688 | 22.803 |
| H | 33.395 | 25.738 | 22.117 |
| O | 35.958 | 10.673 | 13.915 |
| H | 35.175 | 10.32  | 13.493 |
| H | 35.815 | 10.525 | 14.85  |
| O | 32.982 | 14.146 | 13.03  |
| H | 33.495 | 13.501 | 12.543 |
| H | 33.138 | 13.931 | 13.95  |
| O | 29.29  | 12.914 | 5.866  |
| H | 28.755 | 13.501 | 5.332  |
| H | 29.356 | 13.355 | 6.713  |
| O | 27.587 | 22.533 | 6.576  |
| H | 27.384 | 22.656 | 7.503  |
| H | 26.773 | 22.205 | 6.193  |
| O | 35.239 | 24.226 | 22.752 |
| H | 35.057 | 23.301 | 22.584 |
| H | 35.71  | 24.522 | 21.974 |
| O | 35.225 | 21.368 | 9.799  |
| H | 34.727 | 22.182 | 9.874  |
| H | 34.904 | 20.965 | 8.992  |
| O | 24.198 | 19.84  | 23.687 |
| H | 24.475 | 20.696 | 23.361 |
| H | 23.265 | 19.795 | 23.477 |
| O | 35.223 | 17.396 | 7.188  |
| H | 35.424 | 16.46  | 7.207  |
| H | 35.023 | 17.579 | 6.27   |
| O | 27.776 | 19.346 | 29.523 |
| H | 28.367 | 18.91  | 28.909 |
| H | 27.057 | 18.725 | 29.643 |
| O | 31.049 | 20.49  | 23.466 |
| H | 31.305 | 20.855 | 22.619 |
| H | 30.106 | 20.348 | 23.391 |
| O | 36.167 | 24.994 | 20.402 |
| H | 36.008 | 24.584 | 19.552 |

|   |        |        |        |
|---|--------|--------|--------|
| H | 36.629 | 25.806 | 20.193 |
| O | 33.02  | 19.355 | 24.959 |
| H | 32.359 | 19.651 | 24.333 |
| H | 32.922 | 18.403 | 24.978 |
| O | 35.863 | 19.669 | 11.703 |
| H | 35.851 | 20.058 | 10.828 |
| H | 36.775 | 19.412 | 11.839 |
| O | 34.337 | 17.381 | 18.699 |
| H | 33.413 | 17.138 | 18.745 |
| H | 34.589 | 17.193 | 17.794 |
| O | 37.085 | 11.712 | 11.01  |
| H | 37.46  | 11.144 | 11.684 |
| H | 36.145 | 11.709 | 11.19  |
| O | 23.676 | 30.073 | 25.75  |
| H | 23.953 | 29.785 | 26.619 |
| H | 24.338 | 29.716 | 25.157 |
| O | 36.349 | 14.37  | 16.428 |
| H | 35.776 | 13.647 | 16.683 |
| H | 36.874 | 14.547 | 17.209 |
| O | 30.684 | 26.111 | 20.225 |
| H | 30.14  | 25.942 | 20.994 |
| H | 30.563 | 27.043 | 20.045 |
| O | 28.875 | 25.274 | 17.405 |
| H | 29.024 | 24.584 | 16.759 |
| H | 28.96  | 24.832 | 18.25  |
| O | 27.561 | 17.119 | 16.412 |
| H | 27.549 | 17.874 | 15.824 |
| H | 28.209 | 16.527 | 16.028 |
| O | 28.503 | 15.262 | 30.777 |
| H | 29.239 | 14.89  | 30.291 |
| H | 27.726 | 14.937 | 30.321 |
| O | 25.055 | 10.896 | 15.923 |
| H | 24.361 | 10.877 | 15.264 |
| H | 25.56  | 10.099 | 15.762 |
| O | 27.663 | 15.508 | 12.777 |
| H | 28.527 | 15.453 | 12.369 |
| H | 27.845 | 15.681 | 13.701 |
| O | 32.027 | 5.895  | 8.845  |
| H | 31.623 | 6.611  | 8.355  |
| H | 32.166 | 5.207  | 8.194  |
| O | 26.642 | 8.919  | 16.155 |
| H | 27.111 | 8.832  | 15.325 |
| H | 27.2   | 8.476  | 16.794 |
| O | 34.7   | 8.647  | 26.694 |
| H | 34.791 | 8.629  | 25.741 |
| H | 34.874 | 7.746  | 26.968 |
| O | 30.043 | 28.447 | 22.688 |

|   |        |        |        |
|---|--------|--------|--------|
| H | 30.94  | 28.47  | 23.023 |
| H | 29.544 | 28     | 23.371 |
| O | 32.886 | 23.254 | 20.961 |
| H | 33.701 | 22.752 | 20.958 |
| H | 33.126 | 24.103 | 20.589 |
| O | 30.396 | 12.661 | 26.533 |
| H | 29.905 | 13.14  | 27.202 |
| H | 30.326 | 13.206 | 25.749 |
| O | 33.891 | 19.05  | 27.854 |
| H | 33.348 | 19.395 | 27.144 |
| H | 34.755 | 19.431 | 27.701 |
| O | 35.148 | 22.79  | 28.574 |
| H | 35.829 | 23.243 | 29.072 |
| H | 34.691 | 23.488 | 28.105 |
| O | 30.413 | 27.058 | 16.275 |
| H | 29.895 | 26.477 | 16.832 |
| H | 31.257 | 26.616 | 16.186 |
| O | 28.936 | 30.943 | 22.42  |
| H | 28.1   | 30.695 | 22.815 |
| H | 29.402 | 30.115 | 22.306 |
| O | 22.286 | 8.889  | 11.272 |
| H | 23.098 | 9.247  | 10.913 |
| H | 22.562 | 8.394  | 12.043 |
| O | 34.969 | 16.574 | 15.88  |
| H | 35.407 | 15.772 | 16.167 |
| H | 35.513 | 16.901 | 15.163 |
| O | 26.164 | 11.202 | 7.345  |
| H | 25.545 | 10.472 | 7.333  |
| H | 25.8   | 11.815 | 7.984  |
| O | 34.181 | 9.003  | 12.582 |
| H | 33.626 | 8.682  | 13.292 |
| H | 34.185 | 8.293  | 11.941 |
| O | 36.64  | 14.614 | 27.231 |
| H | 37.4   | 14.199 | 26.823 |
| H | 36.183 | 13.897 | 27.67  |
| O | 32.535 | 25.399 | 16.466 |
| H | 32.791 | 25.655 | 17.352 |
| H | 33.049 | 24.612 | 16.286 |
| O | 29.654 | 20.42  | 6.361  |
| H | 29.741 | 21.306 | 6.711  |
| H | 29.071 | 19.975 | 6.976  |
| O | 27.272 | 23.704 | 9.485  |
| H | 26.778 | 24.292 | 10.057 |
| H | 28.073 | 23.512 | 9.972  |
| O | 33.233 | 22.995 | 13.617 |
| H | 33.86  | 22.392 | 13.218 |
| H | 33.294 | 22.817 | 14.555 |



|   |        |        |        |
|---|--------|--------|--------|
| O | 33.064 | 19.005 | 11.754 |
| H | 33.956 | 19.326 | 11.886 |
| H | 33.051 | 18.7   | 10.847 |
| O | 31.386 | 15.609 | 4.205  |
| H | 30.585 | 15.185 | 3.898  |
| H | 31.311 | 15.6   | 5.159  |
| O | 30.605 | 17.651 | 8.116  |
| H | 29.808 | 18.112 | 7.853  |
| H | 30.494 | 17.497 | 9.054  |
| O | 31.855 | 12.147 | 4.692  |
| H | 31.054 | 12.482 | 5.094  |
| H | 32.561 | 12.505 | 5.231  |
| O | 33.099 | 13.381 | 7.205  |
| H | 33.436 | 13.551 | 8.085  |
| H | 32.489 | 14.099 | 7.04   |
| O | 31.29  | 15.336 | 7.075  |
| H | 31.237 | 16.239 | 7.387  |
| H | 30.501 | 14.916 | 7.417  |
| O | 28.183 | 20.556 | 11.69  |
| H | 27.261 | 20.81  | 11.729 |
| H | 28.556 | 21.113 | 11.007 |
| O | 28.184 | 19.383 | 14.719 |
| H | 27.476 | 19.592 | 14.11  |
| H | 28.984 | 19.585 | 14.233 |
| O | 36.55  | 14.959 | 8.939  |
| H | 36.879 | 14.234 | 8.408  |
| H | 37.281 | 15.576 | 8.982  |
| O | 35.485 | 24.696 | 11.699 |
| H | 35.999 | 24.911 | 10.921 |
| H | 35.086 | 25.526 | 11.96  |
| O | 26.657 | 18.865 | 3.959  |
| H | 26.916 | 19.091 | 3.065  |
| H | 27.47  | 18.59  | 4.382  |
| O | 24.872 | 12.144 | 9.43   |
| H | 24.826 | 12.666 | 10.231 |
| H | 23.958 | 11.996 | 9.188  |
| O | 33.348 | 23.688 | 8.391  |
| H | 33.433 | 22.882 | 7.882  |
| H | 32.477 | 24.019 | 8.171  |
| O | 29.221 | 6.522  | 10.379 |
| H | 28.456 | 5.947  | 10.342 |
| H | 29.57  | 6.513  | 9.487  |
| O | 33.971 | 12.512 | 11.025 |
| H | 34.129 | 13.342 | 10.575 |
| H | 34.285 | 11.845 | 10.414 |
| O | 24.271 | 2.462  | 24.324 |
| H | 24.276 | 2.433  | 25.281 |

|   |        |        |        |
|---|--------|--------|--------|
| H | 23.367 | 2.68   | 24.096 |
| O | 33.118 | 5.384  | 21.004 |
| H | 33.837 | 5.702  | 20.458 |
| H | 33.437 | 5.483  | 21.901 |
| O | 34.115 | 11.559 | 24.22  |
| H | 33.339 | 11.165 | 23.821 |
| H | 33.861 | 11.723 | 25.128 |
| O | 29.064 | 5.922  | 23.31  |
| H | 29.919 | 5.734  | 23.696 |
| H | 28.435 | 5.683  | 23.992 |
| O | 27.828 | 5.596  | 25.887 |
| H | 28.47  | 5.873  | 26.541 |
| H | 27.619 | 4.693  | 26.125 |
| O | 26.832 | 5.189  | 21.622 |
| H | 27.252 | 5.047  | 20.773 |
| H | 27.56  | 5.309  | 22.232 |
| O | 27.915 | 9.266  | 11.271 |
| H | 28.66  | 9.642  | 10.801 |
| H | 28.008 | 8.321  | 11.15  |
| O | 29.43  | 4.772  | 14.03  |
| H | 30.115 | 5.18   | 14.559 |
| H | 29.462 | 5.24   | 13.195 |
| O | 31.206 | 3.357  | 19.326 |
| H | 31.592 | 3.95   | 19.971 |
| H | 31.079 | 2.536  | 19.801 |
| O | 34.216 | 13.143 | 17.637 |
| H | 33.781 | 13.513 | 18.405 |
| H | 33.591 | 12.503 | 17.294 |
| O | 31.702 | 10.129 | 12.535 |
| H | 31.309 | 9.286  | 12.76  |
| H | 32.645 | 9.98   | 12.605 |
| O | 30.057 | 0.978  | 21.063 |
| H | 30.471 | 0.117  | 21.002 |
| H | 29.124 | 0.788  | 21.16  |
| O | 24.574 | 1.164  | 20.131 |
| H | 23.643 | 0.949  | 20.082 |
| H | 24.638 | 1.789  | 20.853 |
| O | 36.861 | 8.365  | 12.361 |
| H | 37.085 | 8.591  | 11.459 |
| H | 35.918 | 8.519  | 12.419 |
| O | 26.913 | 4.285  | 15.371 |
| H | 26.952 | 3.337  | 15.496 |
| H | 27.829 | 4.556  | 15.306 |
| O | 33.035 | 8.455  | 8.69   |
| H | 32.114 | 8.259  | 8.861  |
| H | 33.169 | 8.202  | 7.777  |
| O | 24.191 | 6.078  | 28.866 |

|   |        |        |        |
|---|--------|--------|--------|
| H | 23.464 | 5.96   | 29.478 |
| H | 23.769 | 6.211  | 28.017 |
| O | 34.781 | 6.16   | 16.103 |
| H | 35.49  | 6.193  | 16.745 |
| H | 34.378 | 5.302  | 16.235 |
| O | 30.626 | 7.601  | 12.479 |
| H | 30.147 | 7.318  | 11.699 |
| H | 31.486 | 7.19   | 12.393 |
| O | 32.572 | 8.073  | 14.925 |
| H | 33.368 | 7.745  | 15.343 |
| H | 31.863 | 7.787  | 15.501 |
| O | 27.036 | 1.61   | 16.375 |
| H | 27.747 | 1.122  | 16.791 |
| H | 27.079 | 1.356  | 15.453 |
| O | 29.913 | 6.883  | 27.251 |
| H | 30.44  | 6.318  | 27.816 |
| H | 30.516 | 7.572  | 26.973 |
| O | 32.539 | 7.536  | 19.134 |
| H | 32.199 | 7.545  | 18.239 |
| H | 33.388 | 7.099  | 19.063 |
| O | 32.493 | 5.52   | 11.477 |
| H | 33.429 | 5.702  | 11.563 |
| H | 32.308 | 5.65   | 10.547 |
| O | 25.355 | 8.517  | 22.306 |
| H | 25.206 | 7.892  | 23.016 |
| H | 26.306 | 8.621  | 22.275 |
| O | 31.904 | 8.888  | 27.088 |
| H | 31.792 | 8.912  | 26.138 |
| H | 32.853 | 8.878  | 27.217 |
| O | 22.716 | 6.274  | 26.162 |
| H | 22.311 | 6.96   | 26.692 |
| H | 22.078 | 6.099  | 25.47  |
| O | 35.106 | 6.298  | 19.48  |
| H | 35.449 | 5.405  | 19.525 |
| H | 35.801 | 6.84   | 19.854 |
| O | 29.441 | 10.867 | 16.12  |
| H | 29.416 | 10.227 | 15.408 |
| H | 28.616 | 11.345 | 16.04  |
| O | 32.208 | 2.876  | 13.624 |
| H | 32.253 | 3.774  | 13.295 |
| H | 31.978 | 2.351  | 12.857 |
| O | 31.122 | 12.532 | 11.065 |
| H | 31.196 | 11.965 | 11.832 |
| H | 32.015 | 12.84  | 10.907 |
| O | 28.552 | 8.795  | 13.93  |
| H | 29.499 | 8.672  | 13.861 |
| H | 28.268 | 8.976  | 13.034 |

|   |        |        |        |
|---|--------|--------|--------|
| O | 29.73  | 10.361 | 9.699  |
| H | 29.491 | 10.671 | 8.826  |
| H | 30.535 | 10.834 | 9.91   |
| O | 30.307 | 8.048  | 7.832  |
| H | 29.872 | 7.646  | 7.079  |
| H | 29.927 | 8.925  | 7.887  |
| O | 22.492 | 8.265  | 4.963  |
| H | 21.699 | 8.599  | 5.382  |
| H | 22.78  | 8.978  | 4.393  |
| O | 15.325 | 23.619 | 35.24  |
| H | 15.641 | 23.96  | 34.403 |
| H | 15.405 | 22.669 | 35.156 |
| O | 9.173  | 27.776 | 28.296 |
| H | 8.972  | 27.205 | 29.038 |
| H | 8.339  | 28.194 | 28.083 |
| O | 26.718 | 26.606 | 22.365 |
| H | 26.922 | 27.468 | 22.002 |
| H | 25.77  | 26.522 | 22.263 |
| O | 12.169 | 19.132 | 33.848 |
| H | 12.133 | 18.575 | 33.07  |
| H | 11.785 | 19.962 | 33.566 |
| O | 20.485 | 24.189 | 26.946 |
| H | 19.824 | 23.499 | 26.989 |
| H | 20.982 | 24.095 | 27.759 |
| O | 13.474 | 28.382 | 29.119 |
| H | 14.419 | 28.431 | 29.264 |
| H | 13.146 | 29.24  | 29.391 |
| O | 22.005 | 21.03  | 34.568 |
| H | 21.915 | 20.422 | 35.303 |
| H | 22.446 | 21.793 | 34.941 |
| O | 15.726 | 30.467 | 29.749 |
| H | 16.302 | 30.295 | 29.004 |
| H | 16.307 | 30.45  | 30.51  |
| O | 18.257 | 28.509 | 30.224 |
| H | 18.347 | 29.452 | 30.087 |
| H | 19.118 | 28.152 | 30.008 |
| O | 17.616 | 30.699 | 27.489 |
| H | 18.476 | 30.45  | 27.83  |
| H | 17.308 | 29.921 | 27.025 |
| O | 20.676 | 27.261 | 30.028 |
| H | 20.794 | 26.311 | 30.033 |
| H | 21.132 | 27.563 | 30.814 |
| O | 20.288 | 30.264 | 27.478 |
| H | 21.034 | 30.563 | 27.997 |
| H | 20.599 | 29.467 | 27.049 |
| O | 17.431 | 24.711 | 33.291 |
| H | 18.114 | 24.165 | 32.902 |

|   |        |        |        |
|---|--------|--------|--------|
| H | 17.703 | 25.608 | 33.098 |
| O | 6.966  | 29.291 | 27.904 |
| H | 6.509  | 28.464 | 27.747 |
| H | 6.272  | 29.909 | 28.133 |
| O | 14.234 | 29.451 | 25.8   |
| H | 13.729 | 28.82  | 25.288 |
| H | 13.582 | 30.076 | 26.118 |
| O | 21.841 | 25.67  | 24.919 |
| H | 21.461 | 24.958 | 25.433 |
| H | 22.774 | 25.46  | 24.871 |
| O | 29.046 | 24.005 | 30.607 |
| H | 28.918 | 23.161 | 31.04  |
| H | 28.924 | 24.652 | 31.302 |
| O | 23.943 | 26.468 | 22.389 |
| H | 23.24  | 27.114 | 22.464 |
| H | 23.571 | 25.769 | 21.852 |
| O | 12.238 | 24.196 | 24.379 |
| H | 12.264 | 25.01  | 23.876 |
| H | 13.158 | 23.962 | 24.504 |
| O | 14.585 | 30.731 | 16.435 |
| H | 15.025 | 30.964 | 15.618 |
| H | 15.297 | 30.594 | 17.06  |
| O | 13.619 | 27.917 | 18.44  |
| H | 14.291 | 28.521 | 18.757 |
| H | 13.651 | 27.182 | 19.051 |
| O | 18.176 | 26.857 | 16.936 |
| H | 17.888 | 25.989 | 17.218 |
| H | 17.621 | 27.464 | 17.426 |
| O | 13.323 | 32.607 | 17.845 |
| H | 13.569 | 33.321 | 17.257 |
| H | 13.903 | 31.886 | 17.601 |
| O | 24.608 | 30.968 | 17.556 |
| H | 24.77  | 31.723 | 16.991 |
| H | 24.687 | 31.312 | 18.446 |
| O | 13.129 | 20.587 | 24.819 |
| H | 14.035 | 20.781 | 25.059 |
| H | 12.692 | 21.438 | 24.822 |
| O | 23.146 | 31.118 | 22.018 |
| H | 22.361 | 31.601 | 22.276 |
| H | 23.577 | 31.685 | 21.38  |
| O | 21.864 | 31.131 | 14.358 |
| H | 22.43  | 31.33  | 13.612 |
| H | 22.398 | 30.572 | 14.922 |
| O | 28.649 | 27.805 | 29.073 |
| H | 28.908 | 28.701 | 29.29  |
| H | 28.182 | 27.496 | 29.849 |
| O | 15.224 | 33.394 | 22.1   |

|   |        |        |        |
|---|--------|--------|--------|
| H | 14.403 | 33.115 | 21.695 |
| H | 15.834 | 32.678 | 21.924 |
| O | 17.794 | 32.381 | 17.737 |
| H | 18.417 | 32.355 | 18.463 |
| H | 17.235 | 31.616 | 17.873 |
| O | 21.06  | 28.306 | 25.498 |
| H | 20.998 | 27.406 | 25.18  |
| H | 21.99  | 28.522 | 25.427 |
| O | 8.368  | 24.538 | 22.244 |
| H | 8.26   | 25.485 | 22.33  |
| H | 8.09   | 24.345 | 21.349 |
| O | 5.765  | 27.763 | 9.94   |
| H | 6.481  | 28.139 | 9.428  |
| H | 5.195  | 27.352 | 9.289  |
| O | 14.801 | 26.026 | 20.08  |
| H | 15.168 | 25.155 | 19.923 |
| H | 14.58  | 26.028 | 21.011 |
| O | 11.605 | 29.867 | 17.285 |
| H | 11.941 | 29.176 | 17.856 |
| H | 12.281 | 29.973 | 16.615 |
| O | 11.77  | 26.697 | 27.758 |
| H | 12.281 | 27.238 | 28.36  |
| H | 10.88  | 27.045 | 27.821 |
| O | 16.841 | 21.428 | 19.485 |
| H | 17.664 | 21.307 | 19.96  |
| H | 16.432 | 20.562 | 19.491 |
| O | 18.218 | 30.917 | 13.635 |
| H | 19.02  | 31.44  | 13.633 |
| H | 17.531 | 31.533 | 13.89  |
| O | 19.683 | 31.273 | 19.221 |
| H | 20.549 | 31.558 | 19.514 |
| H | 19.263 | 30.935 | 20.012 |
| O | 23.848 | 33.568 | 16.213 |
| H | 23.958 | 34.397 | 16.679 |
| H | 22.989 | 33.639 | 15.797 |
| O | 12.027 | 31.117 | 27.063 |
| H | 11.365 | 31.8   | 27.175 |
| H | 11.555 | 30.392 | 26.654 |
| O | 16.147 | 31.036 | 24.68  |
| H | 15.607 | 30.323 | 25.021 |
| H | 16.072 | 31.728 | 25.337 |
| O | 15.518 | 30.124 | 19.132 |
| H | 15.1   | 30.613 | 19.841 |
| H | 16.381 | 29.894 | 19.476 |
| O | 12.982 | 31.74  | 23.971 |
| H | 13.642 | 32.434 | 23.982 |
| H | 12.747 | 31.618 | 24.891 |

|   |        |        |        |
|---|--------|--------|--------|
| O | 14.1   | 25.544 | 16.465 |
| H | 14.254 | 26.406 | 16.851 |
| H | 13.352 | 25.195 | 16.95  |
| O | 22.678 | 29.625 | 16.507 |
| H | 23.225 | 30.276 | 16.946 |
| H | 22.985 | 28.785 | 16.848 |
| O | 19.204 | 28.066 | 13.227 |
| H | 19.892 | 28.232 | 12.582 |
| H | 18.729 | 28.895 | 13.289 |
| O | 7.314  | 30.539 | 12.014 |
| H | 7.302  | 31.433 | 11.672 |
| H | 8.18   | 30.205 | 11.78  |
| O | 26.659 | 25.853 | 7.926  |
| H | 27.319 | 26.349 | 8.411  |
| H | 26.742 | 24.958 | 8.256  |
| O | 15.718 | 25.165 | 8.299  |
| H | 16.584 | 24.811 | 8.1    |
| H | 15.678 | 25.178 | 9.255  |
| O | 11.17  | 29.151 | 21.291 |
| H | 12.004 | 29.4   | 21.69  |
| H | 11.226 | 28.201 | 21.193 |
| O | 33.37  | 25.639 | 19.299 |
| H | 32.733 | 25.983 | 19.926 |
| H | 34.157 | 26.164 | 19.446 |
| O | 27.048 | 30.86  | 11.619 |
| H | 26.8   | 30.85  | 12.543 |
| H | 27.668 | 30.136 | 11.529 |
| O | 16.267 | 28.198 | 26.672 |
| H | 16.151 | 27.332 | 26.281 |
| H | 15.448 | 28.656 | 26.485 |
| O | 25.075 | 27.949 | 24.701 |
| H | 25.929 | 27.518 | 24.754 |
| H | 24.626 | 27.503 | 23.984 |
| O | 19.353 | 30.071 | 21.619 |
| H | 18.914 | 29.509 | 22.257 |
| H | 20.133 | 30.387 | 22.075 |
| O | 10.628 | 21.988 | 23.73  |
| H | 11.119 | 22.808 | 23.678 |
| H | 10.072 | 21.992 | 22.95  |
| O | 27.111 | 28.882 | 20.581 |
| H | 26.437 | 28.446 | 20.06  |
| H | 27.194 | 29.751 | 20.189 |
| O | 24.864 | 28.34  | 27.769 |
| H | 24.911 | 28.056 | 26.856 |
| H | 24.993 | 27.538 | 28.276 |
| O | 20.749 | 31.69  | 23.145 |
| H | 20.137 | 31.867 | 23.859 |

|   |        |        |        |
|---|--------|--------|--------|
| H | 20.467 | 32.272 | 22.439 |
| O | 26.818 | 26.169 | 11.249 |
| H | 27.134 | 26.174 | 12.152 |
| H | 25.937 | 26.54  | 11.3   |
| O | 9.952  | 29.522 | 11.572 |
| H | 10.733 | 28.969 | 11.58  |
| H | 10.217 | 30.318 | 12.033 |
| O | 26.258 | 25.458 | 17.288 |
| H | 27.206 | 25.532 | 17.392 |
| H | 26.119 | 25.466 | 16.341 |
| O | 27.754 | 31.248 | 14.701 |
| H | 28.2   | 30.494 | 15.088 |
| H | 28.211 | 32.008 | 15.062 |
| O | 14.62  | 29.462 | 12.835 |
| H | 14.506 | 29.02  | 13.676 |
| H | 15.562 | 29.427 | 12.671 |
| O | 11.198 | 28.961 | 25.719 |
| H | 10.812 | 28.193 | 26.141 |
| H | 10.637 | 29.124 | 24.961 |
| O | 17.29  | 27.644 | 20.529 |
| H | 17.728 | 27.128 | 21.207 |
| H | 16.63  | 27.052 | 20.168 |
| O | 9.673  | 27.338 | 8.737  |
| H | 9.208  | 28.142 | 8.968  |
| H | 9.243  | 27.033 | 7.938  |
| O | 17.386 | 22.204 | 3.892  |
| H | 16.485 | 21.885 | 3.843  |
| H | 17.73  | 21.825 | 4.701  |
| O | 19.786 | 28.492 | 6.317  |
| H | 20.009 | 28.509 | 5.387  |
| H | 19.082 | 27.846 | 6.383  |
| O | 17.153 | 30.287 | 9.094  |
| H | 18.033 | 30.583 | 8.857  |
| H | 16.612 | 30.518 | 8.34   |
| O | 24.095 | 32.693 | 12.689 |
| H | 24.197 | 33.57  | 13.059 |
| H | 24.397 | 32.104 | 13.38  |
| O | 15.103 | 31.043 | 10.626 |
| H | 15.695 | 30.398 | 10.24  |
| H | 15.009 | 30.766 | 11.537 |
| O | 20.817 | 29.522 | 11.52  |
| H | 21.724 | 29.388 | 11.794 |
| H | 20.821 | 30.376 | 11.088 |
| O | 20.925 | 27.96  | 8.713  |
| H | 20.995 | 28.704 | 9.311  |
| H | 20.462 | 28.309 | 7.951  |
| O | 20.656 | 25.108 | 5.925  |



|   |        |        |        |
|---|--------|--------|--------|
| H | 19.745 | 25.334 | 6.111  |
| H | 20.606 | 24.507 | 5.182  |
| O | 14.253 | 26.808 | 7.076  |
| H | 14.676 | 26.092 | 7.549  |
| H | 14.122 | 27.488 | 7.737  |
| O | 16.955 | 15.331 | 32.7   |
| H | 16.55  | 15.37  | 33.566 |
| H | 16.453 | 15.951 | 32.171 |
| O | 21.44  | 22.08  | 30.761 |
| H | 22.317 | 22.004 | 30.384 |
| H | 21.373 | 21.338 | 31.362 |
| O | 12.756 | 16.479 | 24.912 |
| H | 13.482 | 16.7   | 25.496 |
| H | 12.671 | 17.239 | 24.337 |
| O | 16.042 | 14.118 | 27.054 |
| H | 15.404 | 14.757 | 26.737 |
| H | 16.134 | 14.312 | 27.986 |
| O | 22.676 | 17.042 | 33.605 |
| H | 23.063 | 16.219 | 33.905 |
| H | 21.794 | 17.042 | 33.976 |
| O | 4.385  | 14.355 | 22.132 |
| H | 4.404  | 14.303 | 21.176 |
| H | 5.022  | 15.036 | 22.348 |
| O | 26.962 | 21.825 | 33.666 |
| H | 26.371 | 21.81  | 32.913 |
| H | 27.319 | 20.938 | 33.708 |
| O | 16.029 | 25.333 | 26.761 |
| H | 16.951 | 25.579 | 26.679 |
| H | 15.939 | 25.037 | 27.667 |
| O | 11.873 | 17.622 | 29.258 |
| H | 11.424 | 17.928 | 28.469 |
| H | 12.778 | 17.482 | 28.979 |
| O | 12.847 | 15.651 | 36.472 |
| H | 11.986 | 15.24  | 36.541 |
| H | 12.659 | 16.579 | 36.328 |
| O | 23.729 | 23.294 | 23.224 |
| H | 24.058 | 24.189 | 23.134 |
| H | 24.062 | 22.838 | 22.451 |
| O | 19.392 | 20.508 | 33.059 |
| H | 19.681 | 19.86  | 32.416 |
| H | 20.188 | 20.746 | 33.533 |
| O | 33.331 | 12.525 | 26.742 |
| H | 33.384 | 13.096 | 27.509 |
| H | 32.414 | 12.57  | 26.472 |
| O | 14.938 | 14.961 | 34.797 |
| H | 14.775 | 14.024 | 34.687 |
| H | 14.259 | 15.252 | 35.406 |

|   |        |        |        |
|---|--------|--------|--------|
| O | 10.502 | 21.215 | 32.977 |
| H | 10.478 | 21.586 | 33.858 |
| H | 11.075 | 21.803 | 32.484 |
| O | 21.786 | 24.636 | 30.15  |
| H | 22.028 | 23.795 | 30.538 |
| H | 22.583 | 24.936 | 29.713 |
| O | 19.4   | 13.241 | 34.309 |
| H | 19.748 | 12.462 | 33.876 |
| H | 18.695 | 12.911 | 34.866 |
| O | 15.76  | 9.473  | 30.393 |
| H | 14.834 | 9.234  | 30.432 |
| H | 15.937 | 9.596  | 29.461 |
| O | 19.217 | 23.957 | 31.127 |
| H | 20.148 | 24.159 | 31.03  |
| H | 19.154 | 23.022 | 30.934 |
| O | 19.267 | 10.349 | 29.028 |
| H | 18.369 | 10.678 | 28.982 |
| H | 19.722 | 10.973 | 29.593 |
| O | 16.387 | 20.326 | 30.157 |
| H | 16.358 | 20.609 | 31.071 |
| H | 17.16  | 20.758 | 29.797 |
| O | 6.095  | 13.607 | 30.531 |
| H | 5.914  | 14.046 | 31.362 |
| H | 5.245  | 13.568 | 30.091 |
| O | 21.717 | 19.25  | 31.351 |
| H | 22.221 | 19.013 | 30.573 |
| H | 21.531 | 18.414 | 31.779 |
| O | 13.236 | 26.962 | 33.362 |
| H | 13.729 | 27.188 | 34.15  |
| H | 13.65  | 26.161 | 33.042 |
| O | 21.773 | 16.589 | 28.207 |
| H | 21.965 | 16.894 | 27.32  |
| H | 22.616 | 16.28  | 28.541 |
| O | 30.768 | 14.722 | 29.267 |
| H | 30.961 | 15.589 | 28.908 |
| H | 31.615 | 14.279 | 29.291 |
| O | 25.178 | 27.253 | 30.538 |
| H | 26.098 | 27.493 | 30.65  |
| H | 24.755 | 28.057 | 30.237 |
| O | 19.91  | 17.365 | 34.391 |
| H | 19.781 | 16.988 | 35.261 |
| H | 19.934 | 18.31  | 34.541 |
| O | 7.472  | 18.784 | 29.415 |
| H | 6.896  | 18.049 | 29.205 |
| H | 7.735  | 18.631 | 30.322 |
| O | 13.558 | 25.662 | 30.212 |
| H | 13.476 | 26.59  | 30.432 |

|   |        |        |        |
|---|--------|--------|--------|
| H | 13.048 | 25.56  | 29.408 |
| O | 19.811 | 22.199 | 24.228 |
| H | 20.647 | 22.43  | 24.631 |
| H | 19.187 | 22.198 | 24.953 |
| O | 27.923 | 8.658  | 28.649 |
| H | 28.431 | 9.442  | 28.441 |
| H | 28.362 | 7.955  | 28.171 |
| O | 22.458 | 17.144 | 25.325 |
| H | 22.54  | 16.622 | 24.528 |
| H | 23.125 | 17.825 | 25.235 |
| O | 12.872 | 12.642 | 31.282 |
| H | 13.08  | 12.215 | 32.114 |
| H | 12.789 | 13.569 | 31.504 |
| O | 28.235 | 15.187 | 27.246 |
| H | 28.641 | 15.958 | 27.641 |
| H | 28.357 | 15.307 | 26.304 |
| O | 21.999 | 28.447 | 22.887 |
| H | 21.135 | 28.619 | 23.261 |
| H | 22.272 | 29.286 | 22.517 |
| O | 11.937 | 14.865 | 28.668 |
| H | 11.386 | 14.863 | 27.885 |
| H | 11.646 | 15.632 | 29.162 |
| O | 20.122 | 14.863 | 32.256 |
| H | 19.815 | 15.711 | 32.578 |
| H | 20.11  | 14.296 | 33.026 |
| O | 12.206 | 23.256 | 31.77  |
| H | 13.122 | 23.494 | 31.626 |
| H | 11.757 | 23.541 | 30.974 |
| O | 10.115 | 20.572 | 28.846 |
| H | 9.487  | 20.234 | 29.485 |
| H | 10.295 | 19.828 | 28.271 |
| O | 10.232 | 22.241 | 35.53  |
| H | 10.897 | 22.868 | 35.243 |
| H | 10.598 | 21.85  | 36.323 |
| O | 21.743 | 21.82  | 27.681 |
| H | 22.61  | 21.852 | 27.276 |
| H | 21.234 | 21.243 | 27.112 |
| O | 14.851 | 23.762 | 24.915 |
| H | 15.36  | 24.056 | 24.159 |
| H | 15.232 | 24.231 | 25.657 |
| O | 17.235 | 13.891 | 29.551 |
| H | 16.489 | 13.548 | 30.042 |
| H | 17.465 | 14.704 | 30     |
| O | 12.496 | 18.392 | 23.093 |
| H | 12.583 | 19.222 | 23.562 |
| H | 12.739 | 18.6   | 22.191 |
| O | 13.511 | 21.266 | 28.659 |

|   |        |        |        |
|---|--------|--------|--------|
| H | 12.659 | 21.659 | 28.471 |
| H | 13.674 | 21.478 | 29.579 |
| O | 19.58  | 12.408 | 31.127 |
| H | 19.432 | 13.285 | 31.481 |
| H | 19.842 | 11.885 | 31.885 |
| O | 9.923  | 17.477 | 27.295 |
| H | 9.111  | 17.051 | 27.568 |
| H | 10.363 | 16.827 | 26.747 |
| O | 18.347 | 8.686  | 25.953 |
| H | 18.62  | 9.597  | 26.065 |
| H | 18.068 | 8.41   | 26.826 |
| O | 15.273 | 18.259 | 34.139 |
| H | 14.368 | 18.555 | 34.047 |
| H | 15.707 | 18.562 | 33.342 |
| O | 11.19  | 28.685 | 32.162 |
| H | 11.755 | 28.315 | 32.841 |
| H | 11.729 | 29.356 | 31.742 |
| O | 25.163 | 21.625 | 31.806 |
| H | 25.502 | 21.439 | 30.93  |
| H | 24.998 | 20.762 | 32.187 |
| O | 24.758 | 23.037 | 28.812 |
| H | 24.497 | 23.059 | 27.891 |
| H | 25.629 | 22.639 | 28.804 |
| O | 31.006 | 24.973 | 26.133 |
| H | 31.048 | 25.098 | 27.081 |
| H | 31.194 | 24.044 | 26.005 |
| O | 21.843 | 14.029 | 29.919 |
| H | 21.364 | 13.201 | 29.9   |
| H | 21.47  | 14.505 | 30.661 |
| O | 24.263 | 12.291 | 32.764 |
| H | 23.45  | 11.919 | 33.108 |
| H | 24.274 | 12.031 | 31.843 |
| O | 3.691  | 13.415 | 24.653 |
| H | 3.879  | 13.535 | 23.722 |
| H | 4.249  | 12.684 | 24.918 |
| O | 10.883 | 14.903 | 26.04  |
| H | 10.417 | 14.692 | 25.231 |
| H | 11.719 | 15.265 | 25.746 |
| O | 23.802 | 14.613 | 33.875 |
| H | 23.213 | 14.323 | 34.571 |
| H | 24.165 | 13.803 | 33.517 |
| O | 27.401 | 26.591 | 25.41  |
| H | 27.41  | 26.62  | 26.367 |
| H | 28.087 | 27.203 | 25.145 |
| O | 21.655 | 11.816 | 28.049 |
| H | 22.116 | 11.342 | 28.742 |
| H | 22.219 | 11.724 | 27.281 |

|   |        |        |        |
|---|--------|--------|--------|
| O | 9.156  | 25.736 | 30.419 |
| H | 9.733  | 25.049 | 30.755 |
| H | 9.06   | 26.347 | 31.149 |
| O | 13.533 | 12.733 | 28.119 |
| H | 14.455 | 12.946 | 27.977 |
| H | 13.182 | 13.489 | 28.589 |
| O | 17.614 | 10.009 | 32.893 |
| H | 17.33  | 10.878 | 33.18  |
| H | 17.164 | 9.874  | 32.059 |
| O | 23.935 | 13.857 | 27.143 |
| H | 23.268 | 14.002 | 27.814 |
| H | 24.462 | 14.655 | 27.153 |
| O | 18.692 | 26.056 | 26.329 |
| H | 19.128 | 26.796 | 26.752 |
| H | 19.378 | 25.394 | 26.239 |
| O | 11.851 | 12.855 | 23.124 |
| H | 11.658 | 13.712 | 22.744 |
| H | 12.698 | 12.969 | 23.555 |
| O | 15.626 | 12.123 | 30.89  |
| H | 15.657 | 11.216 | 30.585 |
| H | 14.766 | 12.438 | 30.611 |
| O | 15.9   | 21.018 | 35.538 |
| H | 15.706 | 20.102 | 35.736 |
| H | 16.309 | 21.355 | 36.335 |
| O | 10.014 | 20.59  | 26.179 |
| H | 9.549  | 21.152 | 26.799 |
| H | 10.185 | 21.155 | 25.426 |
| O | 19.394 | 15.833 | 16.886 |
| H | 20.083 | 16.332 | 17.326 |
| H | 18.978 | 15.332 | 17.587 |
| O | 20.054 | 26.94  | 20.282 |
| H | 19.373 | 27.3   | 19.714 |
| H | 19.839 | 26.01  | 20.354 |
| O | 16.945 | 12.623 | 24.602 |
| H | 16.984 | 12.276 | 23.71  |
| H | 17.651 | 12.172 | 25.065 |
| O | 22.958 | 16.088 | 5.736  |
| H | 22.339 | 16.502 | 6.337  |
| H | 23.819 | 16.312 | 6.088  |
| O | 23.37  | 10.671 | 13.931 |
| H | 22.71  | 9.994  | 14.082 |
| H | 22.878 | 11.41  | 13.574 |
| O | 26.309 | 9.972  | 32.112 |
| H | 25.764 | 9.271  | 31.755 |
| H | 26.185 | 9.913  | 33.06  |
| O | 15.044 | 14.239 | 14.849 |
| H | 14.889 | 15.184 | 14.839 |

|   |        |        |        |
|---|--------|--------|--------|
| H | 15.803 | 14.127 | 15.421 |
| O | 17.468 | 17.185 | 14.984 |
| H | 17.92  | 16.542 | 15.53  |
| H | 16.609 | 17.286 | 15.394 |
| O | 14.403 | 16.848 | 15.969 |
| H | 13.948 | 17.67  | 16.154 |
| H | 14.21  | 16.292 | 16.723 |
| O | 15.941 | 22.78  | 28.839 |
| H | 15.971 | 22.046 | 29.452 |
| H | 16.454 | 23.468 | 29.264 |
| O | 9.19   | 26.368 | 11.58  |
| H | 9.137  | 26.834 | 10.746 |
| H | 8.366  | 26.573 | 12.023 |
| O | 25.461 | 27.257 | 19.145 |
| H | 24.532 | 27.278 | 19.375 |
| H | 25.525 | 26.581 | 18.47  |
| O | 25.425 | 11.559 | 27.11  |
| H | 24.902 | 12.36  | 27.139 |
| H | 25.715 | 11.43  | 28.013 |
| O | 18.419 | 5.694  | 17.961 |
| H | 17.904 | 5.222  | 17.306 |
| H | 19.284 | 5.287  | 17.924 |
| O | 25.06  | 21.993 | 21.145 |
| H | 25.996 | 22.109 | 20.98  |
| H | 24.83  | 21.197 | 20.666 |
| O | 29.628 | 17.598 | 10.714 |
| H | 29.801 | 18.391 | 11.222 |
| H | 30.054 | 16.899 | 11.21  |
| O | 17.57  | 13.249 | 16.234 |
| H | 18.437 | 13.654 | 16.246 |
| H | 17.195 | 13.459 | 17.089 |
| O | 15.28  | 15.817 | 12.454 |
| H | 14.861 | 15.48  | 11.662 |
| H | 15.297 | 15.07  | 13.052 |
| O | 21.627 | 12.663 | 13.231 |
| H | 21.25  | 12.924 | 14.071 |
| H | 21.47  | 13.412 | 12.655 |
| O | 17.755 | 15.73  | 25.649 |
| H | 18.607 | 15.4   | 25.932 |
| H | 17.126 | 15.092 | 25.988 |
| O | 30.373 | 25.709 | 28.908 |
| H | 30.294 | 24.934 | 29.464 |
| H | 29.553 | 26.184 | 29.04  |
| O | 18.731 | 22.555 | 17.426 |
| H | 17.984 | 22.738 | 16.856 |
| H | 18.404 | 22.718 | 18.31  |
| O | 16.305 | 13.653 | 9.176  |

|   |        |        |        |
|---|--------|--------|--------|
| H | 15.683 | 13.996 | 9.818  |
| H | 15.787 | 13.539 | 8.379  |
| O | 14.368 | 13.467 | 21.096 |
| H | 14.669 | 14.215 | 21.613 |
| H | 14.139 | 13.841 | 20.245 |
| O | 22.909 | 23.677 | 16.692 |
| H | 22.302 | 24.379 | 16.929 |
| H | 22.394 | 22.875 | 16.78  |
| O | 22.343 | 26.264 | 13.759 |
| H | 21.624 | 26.451 | 13.154 |
| H | 22.138 | 26.778 | 14.54  |
| O | 28.285 | 4.477  | 19.359 |
| H | 29.064 | 4.957  | 19.64  |
| H | 28.469 | 3.566  | 19.587 |
| O | 8.898  | 18.427 | 15.597 |
| H | 9.56   | 19.004 | 15.215 |
| H | 8.079  | 18.693 | 15.179 |
| O | 11.489 | 21.897 | 12.634 |
| H | 12.403 | 21.614 | 12.659 |
| H | 11.531 | 22.85  | 12.711 |
| O | 21.335 | 19.709 | 23.292 |
| H | 20.775 | 20.422 | 23.599 |
| H | 20.725 | 19.007 | 23.064 |
| O | 30     | 21.412 | 31.927 |
| H | 29.511 | 21.114 | 32.693 |
| H | 30.844 | 20.964 | 31.992 |
| O | 19.946 | 29.885 | 16.909 |
| H | 20.864 | 29.831 | 16.642 |
| H | 19.97  | 30.307 | 17.768 |
| O | 13.262 | 26.321 | 13.77  |
| H | 13.79  | 27.004 | 14.183 |
| H | 13.563 | 25.508 | 14.176 |
| O | 25.524 | 21.135 | 12.809 |
| H | 25.102 | 20.588 | 12.146 |
| H | 25.298 | 22.031 | 12.559 |
| O | 27.382 | 25.171 | 14.397 |
| H | 27.956 | 24.443 | 14.635 |
| H | 26.543 | 24.758 | 14.194 |
| O | 19.293 | 13.239 | 27.628 |
| H | 18.729 | 13.63  | 28.295 |
| H | 20.128 | 13.096 | 28.074 |
| O | 11.386 | 16.902 | 19.667 |
| H | 10.675 | 17.357 | 19.216 |
| H | 11.773 | 17.567 | 20.236 |
| O | 9.365  | 12.364 | 8.054  |
| H | 9.292  | 11.497 | 7.656  |
| H | 10.244 | 12.381 | 8.432  |

|   |        |        |        |
|---|--------|--------|--------|
| O | 14.224 | 10.457 | 25.473 |
| H | 13.675 | 10.076 | 24.788 |
| H | 13.607 | 10.898 | 26.057 |
| O | 27.741 | 16.05  | 24.581 |
| H | 26.823 | 16.164 | 24.335 |
| H | 28.205 | 16.731 | 24.094 |
| O | 15.712 | 18.646 | 24.882 |
| H | 16.604 | 18.442 | 24.598 |
| H | 15.821 | 19.333 | 25.539 |
| O | 18.883 | 6.511  | 14.197 |
| H | 19.033 | 5.952  | 14.959 |
| H | 19.752 | 6.635  | 13.816 |
| O | 24.681 | 20.073 | 14.961 |
| H | 23.846 | 20.534 | 15.05  |
| H | 25.116 | 20.506 | 14.227 |
| O | 18.261 | 22.005 | 26.323 |
| H | 17.341 | 22.148 | 26.101 |
| H | 18.241 | 21.652 | 27.212 |
| O | 15.03  | 16.584 | 26.547 |
| H | 15.496 | 17.223 | 26.006 |
| H | 14.873 | 17.039 | 27.374 |
| O | 19.257 | 18.968 | 27.196 |
| H | 19.113 | 18.833 | 26.259 |
| H | 19.164 | 18.097 | 27.581 |
| O | 13.242 | 15.061 | 18.782 |
| H | 12.414 | 14.723 | 18.441 |
| H | 13.003 | 15.872 | 19.231 |
| O | 2.269  | 13.672 | 11.287 |
| H | 2.89   | 12.998 | 11.562 |
| H | 1.484  | 13.186 | 11.034 |
| O | 18.487 | 11.278 | 13.645 |
| H | 18.181 | 11.915 | 13     |
| H | 18.748 | 11.807 | 14.399 |
| O | 16.854 | 8.504  | 19.286 |
| H | 17.512 | 8.476  | 19.98  |
| H | 16.016 | 8.472  | 19.748 |
| O | 14.272 | 18.25  | 13.393 |
| H | 14.767 | 17.467 | 13.154 |
| H | 13.532 | 18.261 | 12.786 |
| O | 21.4   | 11.534 | 24.354 |
| H | 22.108 | 10.945 | 24.616 |
| H | 21.833 | 12.373 | 24.195 |
| O | 14.464 | 18.51  | 28.583 |
| H | 13.694 | 19.017 | 28.328 |
| H | 14.964 | 19.1   | 29.147 |
| O | 13.277 | 19.405 | 15.875 |
| H | 13.618 | 19.224 | 14.999 |



|   |        |        |        |
|---|--------|--------|--------|
| H | 13.859 | 20.078 | 16.225 |
| O | 15.771 | 14.127 | 18.118 |
| H | 16.154 | 14.342 | 18.969 |
| H | 14.88  | 14.475 | 18.163 |
| O | 14.25  | 22.462 | 13.34  |
| H | 14.147 | 22.425 | 12.389 |
| H | 15.019 | 23.016 | 13.476 |
| O | 16.827 | 11.302 | 10.527 |
| H | 17.434 | 11.501 | 11.239 |
| H | 16.743 | 12.126 | 10.047 |
| O | 14.742 | 28.238 | 15.334 |
| H | 14.438 | 28.843 | 16.011 |
| H | 15.695 | 28.235 | 15.425 |
| O | 22.076 | 9.108  | 15.841 |
| H | 22.533 | 9.041  | 16.68  |
| H | 21.422 | 9.793  | 15.978 |
| O | 24.223 | 17.423 | 14.731 |
| H | 23.553 | 17.297 | 15.402 |
| H | 24.473 | 18.344 | 14.812 |
| O | 6.718  | 15.743 | 20.562 |
| H | 6.749  | 16.374 | 21.281 |
| H | 7.498  | 15.202 | 20.685 |
| O | 10.755 | 23.099 | 29.429 |
| H | 10.654 | 22.161 | 29.268 |
| H | 10.382 | 23.516 | 28.652 |
| O | 27.991 | 19.053 | 24.709 |
| H | 27.83  | 19.759 | 24.083 |
| H | 27.119 | 18.729 | 24.934 |
| O | 26.205 | 13.685 | 6.223  |
| H | 26.475 | 12.817 | 6.523  |
| H | 25.384 | 13.533 | 5.756  |
| O | 25.571 | 16.088 | 26.879 |
| H | 25.369 | 16.91  | 26.432 |
| H | 26.523 | 16.094 | 26.975 |
| O | 24.569 | 19.77  | 10.825 |
| H | 23.627 | 19.909 | 10.921 |
| H | 24.689 | 18.832 | 10.973 |
| O | 21.065 | 25.826 | 17.148 |
| H | 21.323 | 26.57  | 17.693 |
| H | 20.241 | 26.1   | 16.744 |
| O | 7.429  | 14.828 | 14.904 |
| H | 7.2    | 14.177 | 14.241 |
| H | 8.385  | 14.873 | 14.875 |
| O | 19.662 | 19.241 | 14.753 |
| H | 19.241 | 19.991 | 14.332 |
| H | 18.958 | 18.601 | 14.862 |
| O | 25.015 | 25.077 | 25.389 |

|   |        |        |        |
|---|--------|--------|--------|
| H | 24.909 | 25.396 | 26.285 |
| H | 25.954 | 25.154 | 25.217 |
| O | 15.648 | 10.447 | 15.077 |
| H | 15.635 | 9.705  | 15.681 |
| H | 16.538 | 10.456 | 14.726 |
| O | 24.255 | 22.071 | 26.165 |
| H | 25.154 | 22.104 | 25.836 |
| H | 23.727 | 22.436 | 25.455 |
| O | 19.663 | 25.389 | 12.536 |
| H | 19.505 | 26.136 | 13.115 |
| H | 19.449 | 25.714 | 11.662 |
| O | 22.74  | 15.438 | 22.947 |
| H | 23.517 | 15.344 | 22.397 |
| H | 22.671 | 14.602 | 23.409 |
| O | 14.287 | 21.072 | 10.769 |
| H | 15.146 | 20.653 | 10.73  |
| H | 14.247 | 21.611 | 9.979  |
| O | 9.796  | 9.679  | 25.912 |
| H | 9.944  | 10.403 | 26.52  |
| H | 8.844  | 9.632  | 25.823 |
| O | 22.303 | 16.254 | 11.052 |
| H | 23.249 | 16.2   | 11.189 |
| H | 21.924 | 15.914 | 11.862 |
| O | 16.339 | 23.922 | 16.134 |
| H | 16.628 | 24.337 | 15.322 |
| H | 15.499 | 24.337 | 16.33  |
| O | 21.65  | 19.95  | 11.103 |
| H | 21.479 | 19.292 | 11.777 |
| H | 21.353 | 20.773 | 11.491 |
| O | 16.783 | 20.269 | 14.756 |
| H | 16.29  | 20.474 | 15.55  |
| H | 16.349 | 19.496 | 14.397 |
| O | 20.451 | 13.255 | 15.701 |
| H | 20.65  | 13.928 | 16.352 |
| H | 20.389 | 12.444 | 16.206 |
| O | 24.977 | 13.027 | 11.868 |
| H | 25.252 | 12.3   | 12.426 |
| H | 24.624 | 13.676 | 12.477 |
| O | 25.802 | 21.018 | 5.058  |
| H | 26.396 | 20.3   | 4.84   |
| H | 25.694 | 21.497 | 4.237  |
| O | 18.644 | 13.758 | 12.463 |
| H | 18.538 | 14.559 | 12.976 |
| H | 18.746 | 14.063 | 11.561 |
| O | 16.501 | 15.419 | 20.562 |
| H | 16.026 | 15.502 | 21.388 |
| H | 16.832 | 16.3   | 20.386 |

|   |        |        |        |
|---|--------|--------|--------|
| O | 27.658 | 10.103 | 21.625 |
| H | 28.235 | 10.275 | 20.881 |
| H | 27.592 | 10.945 | 22.077 |
| O | 25.356 | 22.448 | 17.363 |
| H | 25.957 | 23.193 | 17.351 |
| H | 24.51  | 22.82  | 17.113 |
| O | 24.968 | 14.88  | 21.457 |
| H | 25.063 | 13.947 | 21.268 |
| H | 24.656 | 15.261 | 20.636 |
| O | 16.794 | 19.565 | 10.797 |
| H | 16.91  | 18.774 | 11.323 |
| H | 17.268 | 20.244 | 11.278 |
| O | 9.428  | 18.475 | 18.235 |
| H | 8.496  | 18.538 | 18.445 |
| H | 9.453  | 18.386 | 17.282 |
| O | 30.636 | 22.114 | 13.548 |
| H | 31.534 | 22.436 | 13.618 |
| H | 30.729 | 21.169 | 13.423 |
| O | 21.547 | 23.357 | 21.133 |
| H | 22.255 | 23.657 | 20.563 |
| H | 21.957 | 23.253 | 21.991 |
| O | 12.513 | 25.53  | 9.66   |
| H | 12.422 | 24.893 | 8.952  |
| H | 11.833 | 26.181 | 9.486  |
| O | 15.709 | 27.732 | 22.834 |
| H | 16.206 | 28.194 | 22.158 |
| H | 16.316 | 27.07  | 23.166 |
| O | 17.379 | 29.438 | 15.92  |
| H | 18.303 | 29.489 | 16.168 |
| H | 17.258 | 30.157 | 15.3   |
| O | 16.011 | 17.212 | 31.043 |
| H | 15.317 | 17.042 | 30.406 |
| H | 16.788 | 17.379 | 30.51  |
| O | 24.396 | 23.347 | 12.071 |
| H | 24.119 | 24.109 | 11.562 |
| H | 23.629 | 23.12  | 12.597 |
| O | 9.908  | 17.41  | 23.452 |
| H | 10.793 | 17.759 | 23.344 |
| H | 9.347  | 18.185 | 23.484 |
| O | 14.078 | 22.542 | 8.549  |
| H | 14.538 | 23.355 | 8.338  |
| H | 13.169 | 22.71  | 8.303  |
| O | 15.072 | 21.246 | 16.941 |
| H | 15.033 | 21.149 | 17.893 |
| H | 15.506 | 22.088 | 16.804 |
| O | 17.755 | 17.448 | 12.332 |
| H | 18.247 | 17.413 | 13.152 |

|   |        |        |        |
|---|--------|--------|--------|
| H | 16.93  | 17.005 | 12.528 |
| O | 16.921 | 23.022 | 22.968 |
| H | 16.499 | 23.164 | 22.121 |
| H | 17.771 | 22.638 | 22.751 |
| O | 8.472  | 19.84  | 23.852 |
| H | 8.277  | 20.697 | 23.474 |
| H | 8.95   | 20.037 | 24.658 |
| O | 17.786 | 21.334 | 12.658 |
| H | 17.278 | 22.145 | 12.626 |
| H | 17.52  | 20.917 | 13.477 |
| O | 11.65  | 21.466 | 19.131 |
| H | 12.012 | 20.691 | 18.703 |
| H | 11.042 | 21.833 | 18.489 |
| O | 19.878 | 12.178 | 8.33   |
| H | 20.645 | 12.75  | 8.341  |
| H | 19.732 | 11.955 | 9.249  |
| O | 25.465 | 16.898 | 23.713 |
| H | 25.257 | 16.216 | 23.076 |
| H | 24.796 | 17.568 | 23.574 |
| O | 25.204 | 18.77  | 26.226 |
| H | 24.96  | 19.407 | 25.555 |
| H | 24.691 | 19.022 | 26.994 |
| O | 12.147 | 6.908  | 26.549 |
| H | 12.898 | 6.828  | 25.962 |
| H | 11.651 | 7.651  | 26.203 |
| O | 11.774 | 9.792  | 11.863 |
| H | 12.611 | 10.227 | 12.022 |
| H | 11.921 | 9.271  | 11.074 |
| O | 17.469 | 25.759 | 23.544 |
| H | 17.553 | 24.829 | 23.332 |
| H | 18.056 | 25.889 | 24.288 |
| O | 14.927 | 15.308 | 22.925 |
| H | 14.754 | 14.585 | 23.528 |
| H | 14.552 | 16.075 | 23.358 |
| O | 27.736 | 17.219 | 19.315 |
| H | 27.382 | 17.243 | 18.426 |
| H | 27.865 | 16.288 | 19.496 |
| O | 16.768 | 12.765 | 5.92   |
| H | 17.458 | 12.865 | 6.575  |
| H | 16.063 | 12.31  | 6.381  |
| O | 16.482 | 30.519 | 22.119 |
| H | 17.414 | 30.43  | 21.92  |
| H | 16.46  | 30.887 | 23.003 |
| O | 14.371 | 13.497 | 24.665 |
| H | 13.969 | 12.678 | 24.955 |
| H | 15.312 | 13.331 | 24.71  |
| O | 19.094 | 11.327 | 25.729 |

|   |        |        |        |
|---|--------|--------|--------|
| H | 19.08  | 11.87  | 26.518 |
| H | 19.942 | 11.511 | 25.326 |
| O | 20.33  | 2.519  | 14.449 |
| H | 20.702 | 2.649  | 13.576 |
| H | 21.004 | 2.843  | 15.046 |
| O | 10.493 | 14.62  | 6.71   |
| H | 11.024 | 14.708 | 7.502  |
| H | 10.017 | 13.799 | 6.831  |
| O | 18.687 | 29.294 | 24.049 |
| H | 19.196 | 29.293 | 24.859 |
| H | 17.776 | 29.344 | 24.338 |
| O | 18.153 | 10.667 | 4.36   |
| H | 17.706 | 11.199 | 5.019  |
| H | 17.461 | 10.125 | 3.98   |
| O | 20.257 | 22.752 | 12.421 |
| H | 19.441 | 22.302 | 12.202 |
| H | 19.999 | 23.665 | 12.552 |
| O | 16.52  | 23.984 | 12.622 |
| H | 16.125 | 24.529 | 11.941 |
| H | 17.05  | 24.593 | 13.138 |
| O | 9.36   | 26.219 | 24.548 |
| H | 9.741  | 25.846 | 25.343 |
| H | 8.518  | 25.773 | 24.454 |
| O | 21.31  | 21.552 | 17.118 |
| H | 20.371 | 21.738 | 17.095 |
| H | 21.367 | 20.637 | 17.392 |
| O | 20.977 | 33.377 | 16.088 |
| H | 21.084 | 32.541 | 15.635 |
| H | 20.243 | 33.234 | 16.685 |
| O | 26.912 | 22.294 | 24.819 |
| H | 27.582 | 22.928 | 25.074 |
| H | 27.283 | 21.845 | 24.059 |
| O | 26.128 | 20.794 | 8.596  |
| H | 25.623 | 21.575 | 8.823  |
| H | 25.934 | 20.171 | 9.297  |
| O | 28.098 | 12.063 | 12.714 |
| H | 28.49  | 12.491 | 11.953 |
| H | 27.572 | 11.353 | 12.345 |
| O | 20.386 | 16.855 | 22.874 |
| H | 19.688 | 16.2   | 22.901 |
| H | 21.169 | 16.361 | 22.63  |
| O | 20.219 | 17.398 | 9.613  |
| H | 21.062 | 17.358 | 10.063 |
| H | 19.753 | 16.615 | 9.906  |
| O | 34.979 | 25.986 | 24.872 |
| H | 35.883 | 26.274 | 24.747 |
| H | 34.756 | 25.538 | 24.056 |

|   |        |        |        |
|---|--------|--------|--------|
| O | 16.815 | 12.151 | 21.77  |
| H | 15.968 | 12.574 | 21.625 |
| H | 17.118 | 11.915 | 20.894 |
| O | 23.346 | 13.405 | 24.485 |
| H | 23.579 | 13.548 | 25.403 |
| H | 24.171 | 13.162 | 24.065 |
| O | 13.765 | 10.058 | 8.48   |
| H | 13.369 | 9.811  | 7.644  |
| H | 13.745 | 9.255  | 9.001  |
| O | 14.298 | 10.813 | 12.508 |
| H | 14.985 | 10.8   | 11.841 |
| H | 14.71  | 10.432 | 13.283 |
| O | 9.276  | 9.6    | 12.286 |
| H | 9.228  | 10.347 | 12.883 |
| H | 10.196 | 9.561  | 12.025 |
| O | 27.973 | 19.014 | 7.91   |
| H | 27.322 | 19.715 | 7.966  |
| H | 27.618 | 18.314 | 8.458  |
| O | 8.414  | 13.815 | 22.047 |
| H | 8.693  | 12.915 | 21.88  |
| H | 9.23   | 14.309 | 22.122 |
| O | 27.268 | 12.771 | 15.442 |
| H | 26.34  | 12.54  | 15.396 |
| H | 27.646 | 12.406 | 14.643 |
| O | 20.594 | 10.31  | 22.154 |
| H | 21.357 | 9.739  | 22.06  |
| H | 20.755 | 10.793 | 22.965 |
| O | 29.545 | 13.664 | 8.748  |
| H | 28.742 | 13.678 | 9.268  |
| H | 30.139 | 13.095 | 9.239  |
| O | 23.224 | 6.175  | 17.644 |
| H | 23.777 | 6.187  | 16.863 |
| H | 22.995 | 7.093  | 17.788 |
| O | 19.409 | 24.33  | 19.467 |
| H | 20.177 | 23.984 | 19.922 |
| H | 19.523 | 24.05  | 18.559 |
| O | 7.605  | 10.179 | 21.005 |
| H | 8.263  | 10.849 | 21.186 |
| H | 7.961  | 9.687  | 20.265 |
| O | 15.15  | 23.322 | 20.352 |
| H | 15.685 | 22.545 | 20.191 |
| H | 14.359 | 22.986 | 20.773 |
| O | 22.52  | 22.091 | 13.856 |
| H | 21.633 | 22.215 | 13.52  |
| H | 22.443 | 22.242 | 14.798 |
| O | 18.279 | 15.065 | 22.961 |
| H | 17.794 | 15.164 | 23.781 |

|   |        |        |        |
|---|--------|--------|--------|
| H | 17.829 | 14.357 | 22.501 |
| O | 15.927 | 8.033  | 16.597 |
| H | 15.802 | 7.089  | 16.502 |
| H | 16.391 | 8.13   | 17.429 |
| O | 28.018 | 22.874 | 19.665 |
| H | 27.946 | 21.926 | 19.553 |
| H | 28.904 | 23.008 | 20.002 |
| O | 17.628 | 25.957 | 14.337 |
| H | 17.759 | 26.13  | 15.27  |
| H | 18.137 | 26.635 | 13.894 |
| O | 18.063 | 3.425  | 16.417 |
| H | 18.713 | 3.289  | 15.728 |
| H | 17.221 | 3.282  | 15.984 |
| O | 18.629 | 18.047 | 24.495 |
| H | 19.425 | 17.798 | 24.027 |
| H | 18.252 | 17.217 | 24.786 |
| O | 23.616 | 28.7   | 12.625 |
| H | 23.669 | 27.819 | 12.996 |
| H | 24.246 | 29.212 | 13.133 |
| O | 19.091 | 21.702 | 21.61  |
| H | 19.893 | 21.913 | 21.132 |
| H | 19.386 | 21.511 | 22.501 |
| O | 25.261 | 30.427 | 14.657 |
| H | 26.169 | 30.713 | 14.566 |
| H | 25.015 | 30.69  | 15.544 |
| O | 23.917 | 24.227 | 20.046 |
| H | 24.379 | 23.451 | 20.363 |
| H | 24.368 | 24.46  | 19.235 |
| O | 21.055 | 15.483 | 13.922 |
| H | 20.52  | 14.923 | 14.484 |
| H | 21.497 | 16.077 | 14.529 |
| O | 24.222 | 10.565 | 18.262 |
| H | 24.868 | 9.939  | 18.589 |
| H | 24.551 | 10.82  | 17.4   |
| O | 25.046 | 11.998 | 21.977 |
| H | 25.844 | 12.043 | 22.503 |
| H | 24.907 | 11.062 | 21.832 |
| O | 10.185 | 19.902 | 11.363 |
| H | 10.681 | 20.668 | 11.651 |
| H | 9.446  | 19.854 | 11.969 |
| O | 16.788 | 7.395  | 9.922  |
| H | 17.393 | 8.119  | 9.764  |
| H | 16.281 | 7.668  | 10.686 |
| O | 20.387 | 10.75  | 11.029 |
| H | 20.686 | 11.237 | 11.797 |
| H | 21.093 | 10.129 | 10.849 |
| O | 18.426 | 9.698  | 9.126  |

|   |        |        |        |
|---|--------|--------|--------|
| H | 19.206 | 9.307  | 9.522  |
| H | 18.13  | 10.342 | 9.769  |
| O | 18.182 | 24.209 | 8.114  |
| H | 18.945 | 24.632 | 8.509  |
| H | 18.506 | 23.359 | 7.818  |
| O | 21.753 | 14.324 | 8.707  |
| H | 21.991 | 14.935 | 9.404  |
| H | 22.481 | 14.373 | 8.087  |
| O | 18.526 | 27.218 | 32.835 |
| H | 18.441 | 27.806 | 32.083 |
| H | 19.47  | 27.121 | 32.958 |
| O | 27.302 | 31.335 | 19.424 |
| H | 27.752 | 31.879 | 20.07  |
| H | 27.117 | 31.93  | 18.697 |
| O | 13.859 | 28.506 | 8.94   |
| H | 13.25  | 28.633 | 9.667  |
| H | 14.025 | 29.389 | 8.609  |
| O | 22.599 | 19.857 | 8.309  |
| H | 22.736 | 20.754 | 8.005  |
| H | 22.329 | 19.952 | 9.222  |
| O | 14.199 | 6.789  | 25.103 |
| H | 14.274 | 7.493  | 24.458 |
| H | 15.096 | 6.639  | 25.399 |
| O | 26.291 | 30.243 | 23.073 |
| H | 26.462 | 29.894 | 22.198 |
| H | 25.381 | 30.539 | 23.04  |
| O | 11.838 | 22.324 | 4.493  |
| H | 12.076 | 21.49  | 4.897  |
| H | 10.908 | 22.431 | 4.695  |
| O | 14.367 | 16.235 | 2.9    |
| H | 13.944 | 15.378 | 2.948  |
| H | 14.18  | 16.545 | 2.014  |
| O | 9.459  | 16.99  | 9.082  |
| H | 8.605  | 16.558 | 9.061  |
| H | 9.255  | 17.925 | 9.078  |
| O | 20.014 | 14.534 | 5.595  |
| H | 19.448 | 15.158 | 6.05   |
| H | 20.885 | 14.929 | 5.634  |
| O | 19.101 | 14.65  | 9.853  |
| H | 18.31  | 14.349 | 9.407  |
| H | 19.813 | 14.432 | 9.253  |
| O | 23.137 | 21.46  | 5.15   |
| H | 23.075 | 22.353 | 4.812  |
| H | 24.076 | 21.311 | 5.264  |
| O | 19.734 | 25.768 | 9.831  |
| H | 20.332 | 25.069 | 9.568  |
| H | 20.129 | 26.567 | 9.481  |



|   |        |        |        |
|---|--------|--------|--------|
| O | 15.175 | 18.744 | 8.697  |
| H | 15.753 | 18.867 | 9.45   |
| H | 15.604 | 18.066 | 8.174  |
| O | 20.98  | 18.384 | 6.461  |
| H | 20.751 | 19.234 | 6.083  |
| H | 21.596 | 18.593 | 7.162  |
| O | 24.633 | 24.894 | 15.023 |
| H | 24.047 | 24.343 | 15.542 |
| H | 24.047 | 25.426 | 14.484 |
| O | 27.14  | 14.032 | 10.141 |
| H | 26.858 | 14.497 | 10.93  |
| H | 26.466 | 13.368 | 10.001 |
| O | 26.89  | 17.52  | 9.823  |
| H | 26.255 | 17.894 | 10.434 |
| H | 27.67  | 17.362 | 10.355 |
| O | 19.228 | 16.616 | 7.143  |
| H | 20.039 | 16.978 | 6.788  |
| H | 19.092 | 17.09  | 7.963  |
| O | 27.373 | 16.141 | 6.634  |
| H | 27.004 | 15.284 | 6.848  |
| H | 27.278 | 16.65  | 7.439  |
| O | 20.518 | 9.114  | 6.35   |
| H | 19.891 | 9.73   | 5.971  |
| H | 20.06  | 8.737  | 7.101  |
| O | 12.036 | 12.55  | 8.6    |
| H | 12.391 | 11.692 | 8.369  |
| H | 12.764 | 13.156 | 8.461  |
| O | 8.073  | 19.293 | 12.916 |
| H | 7.339  | 19.82  | 13.231 |
| H | 7.831  | 18.392 | 13.131 |
| O | 24.885 | 14.894 | 3.349  |
| H | 24.562 | 15.111 | 4.223  |
| H | 24.685 | 13.964 | 3.243  |
| O | 28.786 | 10.546 | 7.084  |
| H | 29.066 | 11.286 | 6.545  |
| H | 27.829 | 10.58  | 7.058  |
| O | 9.669  | 18.818 | 4.806  |
| H | 8.851  | 18.481 | 5.172  |
| H | 9.542  | 18.775 | 3.858  |
| O | 16.97  | 17.032 | 3.23   |
| H | 16.035 | 16.906 | 3.072  |
| H | 17.264 | 16.202 | 3.606  |
| O | 11.314 | 15.665 | 4.297  |
| H | 11.711 | 14.872 | 3.937  |
| H | 11.11  | 15.44  | 5.204  |
| O | 17.516 | 20.477 | 6.169  |
| H | 16.589 | 20.714 | 6.18   |

|   |        |        |        |
|---|--------|--------|--------|
| H | 17.614 | 19.86  | 6.895  |
| O | 20.423 | 20.967 | 4.975  |
| H | 21.356 | 20.762 | 4.921  |
| H | 20.068 | 20.697 | 4.128  |
| O | 18.504 | 19.38  | 8.678  |
| H | 17.977 | 19.426 | 9.475  |
| H | 19.214 | 18.775 | 8.895  |
| O | 24.323 | 25.463 | 9.965  |
| H | 24.664 | 25.721 | 9.109  |
| H | 23.615 | 26.083 | 10.138 |
| O | 7.78   | 29.723 | 15.323 |
| H | 8.247  | 30.226 | 15.99  |
| H | 8.283  | 28.913 | 15.237 |
| O | 28.416 | 15.156 | 4.449  |
| H | 27.651 | 15.38  | 3.918  |
| H | 28.286 | 15.634 | 5.269  |
| O | 8.864  | 19.929 | 8.576  |
| H | 8.631  | 19.973 | 9.504  |
| H | 9.638  | 20.488 | 8.497  |
| O | 24.171 | 22.829 | 8.747  |
| H | 23.279 | 23.17  | 8.821  |
| H | 24.714 | 23.479 | 9.192  |
| O | 21.244 | 23.78  | 8.287  |
| H | 21.294 | 24.432 | 7.588  |
| H | 20.811 | 23.028 | 7.883  |
| O | 4.91   | 24.684 | 9.583  |
| H | 5.146  | 23.81  | 9.273  |
| H | 5.707  | 25.201 | 9.471  |
| O | 14.608 | 18.205 | 4.848  |
| H | 14.401 | 17.63  | 4.112  |
| H | 13.755 | 18.488 | 5.179  |
| O | 19.924 | 21.603 | 7.612  |
| H | 20.045 | 21.457 | 6.674  |
| H | 19.489 | 20.809 | 7.924  |
| O | 25.516 | 25.351 | 5.345  |
| H | 25.977 | 25.101 | 4.544  |
| H | 26.146 | 25.184 | 6.046  |
| O | 14.314 | 14.558 | 7.198  |
| H | 15.157 | 14.999 | 7.097  |
| H | 13.665 | 15.252 | 7.083  |
| O | 17.02  | 28.357 | 11.062 |
| H | 17.879 | 28.356 | 11.485 |
| H | 17.155 | 28.842 | 10.248 |
| O | 14.979 | 20.976 | 3.838  |
| H | 14.632 | 20.89  | 4.726  |
| H | 14.97  | 20.085 | 3.49   |
| O | 12.076 | 19.619 | 5.305  |

|   |        |        |        |
|---|--------|--------|--------|
| H | 11.173 | 19.305 | 5.315  |
| H | 12.279 | 19.797 | 6.223  |
| O | 24.135 | 9.013  | 7.504  |
| H | 24.017 | 8.16   | 7.084  |
| H | 24.243 | 8.81   | 8.433  |
| O | 20.533 | 7.791  | 9.143  |
| H | 21.058 | 7.108  | 8.727  |
| H | 20.768 | 7.744  | 10.07  |
| O | 14.962 | 26.232 | 10.749 |
| H | 15.29  | 27.119 | 10.896 |
| H | 14.02  | 26.344 | 10.621 |
| O | 15.887 | 7.892  | 6.108  |
| H | 15.984 | 8.007  | 5.163  |
| H | 16.101 | 8.749  | 6.477  |
| O | 23.608 | 12.845 | 5.112  |
| H | 23.199 | 12.399 | 5.853  |
| H | 23.459 | 12.261 | 4.369  |
| O | 12.377 | 19.602 | 8.232  |
| H | 13.164 | 19.429 | 8.749  |
| H | 12.059 | 20.445 | 8.555  |
| O | 18.977 | 18.775 | 3.888  |
| H | 18.348 | 18.072 | 3.726  |
| H | 18.599 | 19.27  | 4.615  |
| O | 22.679 | 10.904 | 3.11   |
| H | 22.851 | 10.328 | 2.366  |
| H | 21.725 | 10.952 | 3.162  |
| O | 25.472 | 8.397  | 29.959 |
| H | 25.162 | 7.627  | 29.481 |
| H | 26.374 | 8.516  | 29.662 |
| O | 27.167 | 3.146  | 27.004 |
| H | 27.574 | 3.303  | 27.857 |
| H | 26.3   | 2.799  | 27.213 |
| O | 22.287 | 10.099 | 32.457 |
| H | 21.46  | 10.028 | 32.934 |
| H | 22.923 | 9.649  | 33.012 |
| O | 23.166 | 10.212 | 29.633 |
| H | 23.016 | 10.028 | 30.561 |
| H | 23.982 | 9.755  | 29.427 |
| O | 21.656 | 8.536  | 27.858 |
| H | 20.705 | 8.617  | 27.786 |
| H | 21.897 | 9.152  | 28.549 |
| O | 20.104 | 6.795  | 25.015 |
| H | 20.145 | 6.764  | 24.059 |
| H | 19.476 | 7.492  | 25.204 |
| O | 21.823 | 4.798  | 23.765 |
| H | 22.025 | 4.211  | 23.036 |
| H | 21.345 | 5.523  | 23.363 |

|   |        |        |        |
|---|--------|--------|--------|
| O | 19.611 | 5.653  | 27.727 |
| H | 19.863 | 6.067  | 26.902 |
| H | 18.656 | 5.606  | 27.69  |
| O | 16.545 | 12.364 | 33.541 |
| H | 16.979 | 13.211 | 33.433 |
| H | 16.058 | 12.239 | 32.727 |
| O | 30.367 | 10.927 | 30.614 |
| H | 30.137 | 11.095 | 29.7   |
| H | 30.953 | 10.171 | 30.578 |
| O | 17.607 | 15.234 | 36.321 |
| H | 16.795 | 15.74  | 36.301 |
| H | 18.274 | 15.862 | 36.598 |
| O | 21.627 | 14.793 | 35.471 |
| H | 20.715 | 14.509 | 35.401 |
| H | 21.725 | 15.062 | 36.384 |
| O | 22.582 | 8.671  | 21.629 |
| H | 22.293 | 7.763  | 21.724 |
| H | 23.441 | 8.695  | 22.051 |
| O | 19.672 | 12.13  | 20.083 |
| H | 18.909 | 11.736 | 19.661 |
| H | 19.929 | 11.496 | 20.753 |
| O | 25.745 | 8.456  | 19.464 |
| H | 26.1   | 7.602  | 19.219 |
| H | 25.767 | 8.46   | 20.421 |
| O | 14.942 | 7.964  | 12.04  |
| H | 14.351 | 7.747  | 12.761 |
| H | 15.77  | 8.182  | 12.468 |
| O | 25.469 | 4.58   | 12.551 |
| H | 24.865 | 4.327  | 13.25  |
| H | 26.339 | 4.488  | 12.942 |
| O | 12.903 | 8.209  | 16.179 |
| H | 13.744 | 7.755  | 16.229 |
| H | 12.679 | 8.196  | 15.249 |
| O | 21.05  | 7.892  | 31.275 |
| H | 20.16  | 8.218  | 31.137 |
| H | 21.543 | 8.658  | 31.568 |
| O | 20.681 | 4.849  | 17.283 |
| H | 21.085 | 3.984  | 17.214 |
| H | 21.419 | 5.454  | 17.358 |
| O | 14.96  | 5.607  | 16.675 |
| H | 15.424 | 5.202  | 17.408 |
| H | 14.977 | 4.944  | 15.985 |
| O | 24.929 | 3.111  | 21.795 |
| H | 24.917 | 2.992  | 22.745 |
| H | 25.167 | 4.03   | 21.672 |
| O | 24.821 | 6.199  | 15.508 |
| H | 25.311 | 5.466  | 15.136 |

|   |        |        |        |
|---|--------|--------|--------|
| H | 25.487 | 6.86   | 15.697 |
| O | 17.851 | 1.131  | 13.511 |
| H | 18.683 | 1.601  | 13.561 |
| H | 17.988 | 0.475  | 12.827 |
| O | 20.735 | 10.817 | 17.859 |
| H | 21.253 | 10.076 | 18.174 |
| H | 20.533 | 11.319 | 18.649 |
| O | 15.859 | 5.475  | 21.218 |
| H | 15.249 | 5.051  | 20.614 |
| H | 15.499 | 6.353  | 21.344 |
| O | 20.771 | 5.262  | 12.215 |
| H | 21.477 | 5.904  | 12.298 |
| H | 21.215 | 4.414  | 12.234 |
| O | 8.106  | 4.926  | 22.752 |
| H | 7.889  | 4.454  | 23.555 |
| H | 7.303  | 5.396  | 22.526 |
| O | 26.792 | 11.473 | 29.652 |
| H | 26.509 | 10.976 | 30.419 |
| H | 27.726 | 11.276 | 29.57  |
| O | 16.933 | 4.598  | 13.488 |
| H | 17.476 | 5.37   | 13.65  |
| H | 16.31  | 4.881  | 12.818 |
| O | 16.408 | 0.042  | 15.543 |
| H | 16.811 | 0.545  | 14.835 |
| H | 15.959 | 0.698  | 16.077 |
| O | 18.595 | 4.874  | 20.615 |
| H | 17.733 | 4.934  | 21.028 |
| H | 18.43  | 5.061  | 19.69  |
| O | 21.641 | 5.335  | 8.322  |
| H | 20.956 | 4.874  | 7.837  |
| H | 21.963 | 4.69   | 8.952  |
| O | 12.953 | 7.93   | 10.109 |
| H | 13.588 | 7.892  | 10.824 |
| H | 12.94  | 7.042  | 9.752  |
| O | 18.496 | 3.178  | 11.406 |
| H | 18.224 | 3.555  | 12.242 |
| H | 18.84  | 3.92   | 10.908 |
| O | 22.777 | 7.188  | 13.749 |
| H | 23.243 | 6.495  | 14.218 |
| H | 22.565 | 7.833  | 14.424 |
| O | 16.939 | 5.794  | 26.44  |
| H | 16.577 | 4.923  | 26.601 |
| H | 17.047 | 5.837  | 25.49  |
| O | 21.614 | 1.321  | 20.076 |
| H | 20.826 | 1.184  | 19.551 |
| H | 21.514 | 2.205  | 20.431 |
| O | 31.542 | 4.771  | 23.447 |

|   |        |       |        |
|---|--------|-------|--------|
| H | 31.094 | 3.938 | 23.3   |
| H | 32.441 | 4.613 | 23.159 |
| O | 29.843 | 2.243 | 23.641 |
| H | 29.688 | 1.597 | 22.952 |
| H | 29.238 | 1.997 | 24.341 |
| O | 23.139 | 3.281 | 9.665  |
| H | 23.681 | 2.631 | 9.217  |
| H | 23.748 | 3.748 | 10.237 |
| O | 22.325 | 8.632 | 18.507 |
| H | 23.08  | 9.21  | 18.608 |
| H | 21.889 | 8.655 | 19.359 |
| O | 15.022 | 8.21  | 21.62  |
| H | 15.405 | 8.711 | 22.34  |
| H | 14.179 | 8.633 | 21.456 |
| O | 23.142 | 5.674 | 20.23  |
| H | 23.876 | 6.209 | 20.531 |
| H | 23.16  | 5.756 | 19.277 |
| O | 15.285 | 3.703 | 25.366 |
| H | 14.592 | 4.302 | 25.088 |
| H | 14.938 | 2.831 | 25.175 |
| O | 13.642 | 6.459 | 29.19  |
| H | 13.072 | 6.541 | 28.425 |
| H | 13.48  | 7.256 | 29.695 |
| O | 12.676 | 4.208 | 13.351 |
| H | 13.055 | 3.36  | 13.582 |
| H | 12.571 | 4.172 | 12.401 |
| O | 21.637 | 2.564 | 12.113 |
| H | 21.388 | 1.645 | 12.019 |
| H | 21.886 | 2.836 | 11.23  |
| O | 17.461 | 8.619 | 13.175 |
| H | 17.91  | 8.001 | 13.751 |
| H | 17.992 | 9.414 | 13.216 |
| O | 16.082 | 5.665 | 7.66   |
| H | 16.446 | 5.935 | 8.502  |
| H | 15.941 | 6.485 | 7.186  |
| O | 31.544 | 8.965 | 24.418 |
| H | 31.384 | 9.851 | 24.091 |
| H | 32.103 | 8.562 | 23.753 |
| O | 13.141 | 8.738 | 30.71  |
| H | 12.558 | 9.463 | 30.484 |
| H | 12.915 | 8.522 | 31.615 |
| O | 18.556 | 4.849 | 9.203  |
| H | 18.646 | 4.897 | 8.251  |
| H | 18.28  | 5.729 | 9.461  |
| O | 18.576 | 7.769 | 30.056 |
| H | 18.811 | 8.652 | 29.77  |
| H | 17.767 | 7.572 | 29.582 |

|   |        |        |        |
|---|--------|--------|--------|
| O | 16.549 | 9.056  | 23.942 |
| H | 17.251 | 8.693  | 24.482 |
| H | 16.269 | 9.842  | 24.409 |
| O | 15.341 | 4.813  | 11.239 |
| H | 14.9   | 5.548  | 10.812 |
| H | 16.027 | 4.555  | 10.623 |
| O | 16.938 | 5.183  | 23.867 |
| H | 16.594 | 5.433  | 23.009 |
| H | 16.63  | 4.286  | 23.996 |
| O | 20.073 | 10.385 | 33.793 |
| H | 19.201 | 10.02  | 33.637 |
| H | 20.269 | 10.157 | 34.701 |
| O | 19.849 | 6.507  | 22.403 |
| H | 19.182 | 7.037  | 21.965 |
| H | 19.777 | 5.645  | 21.994 |
| O | 16.233 | 7.417  | 28.481 |
| H | 15.46  | 6.937  | 28.779 |
| H | 16.505 | 6.962  | 27.684 |
| O | 14.159 | 3.839  | 19.885 |
| H | 13.926 | 3.704  | 18.966 |
| H | 13.77  | 3.094  | 20.343 |
| O | 10.132 | 4.984  | 17.568 |
| H | 10.398 | 4.3    | 18.183 |
| H | 10.626 | 4.794  | 16.771 |
| O | 13.207 | 10.901 | 16.462 |
| H | 13.966 | 10.894 | 15.878 |
| H | 12.945 | 9.983  | 16.526 |
| O | 23.406 | 10.236 | 25.781 |
| H | 23.432 | 9.436  | 26.307 |
| H | 24.233 | 10.677 | 25.974 |
| O | 26.761 | 5.183  | 10.151 |
| H | 26.488 | 5.243  | 11.066 |
| H | 26.044 | 5.582  | 9.659  |
| O | 22.438 | 2.8    | 16.266 |
| H | 22.092 | 1.912  | 16.356 |
| H | 23.145 | 2.849  | 16.909 |
| O | 24.848 | 9.495  | 10.383 |
| H | 24.994 | 10.398 | 10.1   |
| H | 25.694 | 9.213  | 10.73  |
| O | 18.294 | 8.698  | 21.634 |
| H | 19.002 | 9.278  | 21.914 |
| H | 17.596 | 8.848  | 22.271 |
| O | 30.401 | 5.99   | 20.707 |
| H | 31.337 | 6.172  | 20.791 |
| H | 30.087 | 5.927  | 21.609 |
| O | 27.262 | 11.494 | 24.43  |
| H | 26.724 | 11.713 | 25.191 |

|   |        |        |        |
|---|--------|--------|--------|
| H | 27.418 | 10.553 | 24.51  |
| O | 16.553 | 11.125 | 27.716 |
| H | 16.055 | 10.917 | 26.925 |
| H | 16.725 | 12.064 | 27.651 |
| O | 18.636 | 14.472 | 19.061 |
| H | 19.069 | 13.674 | 19.365 |
| H | 18.005 | 14.68  | 19.751 |
| O | 26.295 | 5.941  | 18.23  |
| H | 25.431 | 5.529  | 18.237 |
| H | 26.908 | 5.213  | 18.332 |
| O | 17.242 | 11.293 | 18.992 |
| H | 17.164 | 10.418 | 18.613 |
| H | 16.411 | 11.72  | 18.781 |
| O | 12.88  | 6.997  | 13.606 |
| H | 11.954 | 7.209  | 13.484 |
| H | 12.911 | 6.041  | 13.588 |
| O | 19.435 | 3.691  | 24.066 |
| H | 18.86  | 4.443  | 24.203 |
| H | 20.319 | 4.041  | 24.182 |
| O | 16.393 | 10.343 | 7.185  |
| H | 15.564 | 10.221 | 7.648  |
| H | 17.052 | 9.971  | 7.771  |
| O | 15.596 | 3.233  | 15.249 |
| H | 15.054 | 2.598  | 14.781 |
| H | 15.998 | 3.76   | 14.559 |
| O | 15.731 | 1.372  | 23.561 |
| H | 15.24  | 0.673  | 23.129 |
| H | 16.422 | 1.598  | 22.938 |
| O | 26.97  | 8.357  | 5.414  |
| H | 27.478 | 8.981  | 4.896  |
| H | 26.506 | 8.898  | 6.053  |
| O | 25.578 | 3.142  | 8.252  |
| H | 26.122 | 3.413  | 8.991  |
| H | 26.148 | 3.237  | 7.488  |
| O | 11.883 | 15.87  | 9.605  |
| H | 12.188 | 16.476 | 10.28  |
| H | 11.015 | 16.195 | 9.365  |
| O | 24.408 | 5.797  | 8.197  |
| H | 24.597 | 4.874  | 8.027  |
| H | 23.453 | 5.857  | 8.155  |
| O | 26.397 | 5.797  | 5.436  |
| H | 25.455 | 5.768  | 5.602  |
| H | 26.59  | 6.727  | 5.314  |
| O | 19.994 | 12.734 | 3.459  |
| H | 19.497 | 12.009 | 3.839  |
| H | 20.241 | 13.274 | 4.21   |
| O | 10.105 | 6.966  | 13.376 |



|   |        |        |        |
|---|--------|--------|--------|
| H | 9.583  | 7.713  | 13.084 |
| H | 9.494  | 6.429  | 13.881 |
| O | 28.455 | 2.576  | 12.437 |
| H | 29.256 | 2.052  | 12.414 |
| H | 28.719 | 3.397  | 12.852 |
| O | 13.611 | 12.388 | 5.838  |
| H | 13.832 | 13.156 | 6.364  |
| H | 12.667 | 12.28  | 5.957  |
| O | 24.303 | 15.474 | 8.769  |
| H | 24.325 | 16.277 | 8.249  |
| H | 25.183 | 15.403 | 9.137  |
| O | 10.345 | 24.772 | 26.483 |
| H | 10.794 | 24.263 | 25.808 |
| H | 11.047 | 25.231 | 26.943 |
| O | 6.743  | 23.957 | 24.422 |
| H | 7.142  | 23.753 | 25.268 |
| H | 7.408  | 23.714 | 23.778 |
| O | 8.936  | 31.558 | 24.589 |
| H | 8.915  | 30.649 | 24.291 |
| H | 9.075  | 31.498 | 25.534 |
| O | 6.107  | 26.506 | 31.078 |
| H | 6.689  | 27.135 | 31.505 |
| H | 6.663  | 25.746 | 30.903 |
| O | 8.702  | 28.755 | 24.255 |
| H | 8.471  | 28.172 | 23.532 |
| H | 8.819  | 28.173 | 25.006 |
| O | 4.606  | 20.151 | 25.387 |
| H | 5.257  | 20.411 | 26.038 |
| H | 4.765  | 19.218 | 25.248 |
| O | 5.998  | 26.836 | 27.348 |
| H | 5.629  | 26.154 | 27.91  |
| H | 6.217  | 26.383 | 26.534 |
| O | 5.076  | 30.227 | 15.164 |
| H | 4.855  | 30.868 | 15.839 |
| H | 6.024  | 30.118 | 15.237 |
| O | 10.602 | 31.505 | 19.793 |
| H | 10.867 | 30.812 | 20.398 |
| H | 11.19  | 31.406 | 19.044 |
| O | 3.632  | 28.521 | 20.494 |
| H | 3.004  | 29.238 | 20.584 |
| H | 4.204  | 28.792 | 19.776 |
| O | 15.725 | 32.069 | 14.477 |
| H | 15.909 | 32.881 | 14.949 |
| H | 14.993 | 32.287 | 13.9   |
| O | 11.233 | 24.062 | 21.261 |
| H | 10.486 | 23.476 | 21.134 |
| H | 11.931 | 23.493 | 21.584 |

|   |        |        |        |
|---|--------|--------|--------|
| O | 9.48   | 27.556 | 15.717 |
| H | 10.067 | 26.861 | 15.418 |
| H | 9.744  | 27.719 | 16.622 |
| O | 11.536 | 26.417 | 22.465 |
| H | 10.698 | 26.726 | 22.807 |
| H | 11.308 | 25.667 | 21.915 |
| O | 7.942  | 27.289 | 21.811 |
| H | 7.106  | 26.846 | 21.668 |
| H | 7.809  | 28.17  | 21.461 |
| O | 8.065  | 29.45  | 19.317 |
| H | 8.059  | 30.407 | 19.313 |
| H | 7.166  | 29.204 | 19.098 |
| O | 12.427 | 28.253 | 11.606 |
| H | 12.447 | 27.435 | 12.103 |
| H | 13.199 | 28.734 | 11.905 |
| O | 7.57   | 23.724 | 19.557 |
| H | 6.861  | 23.086 | 19.479 |
| H | 7.503  | 24.255 | 18.763 |
| O | 5.349  | 29.145 | 18.434 |
| H | 5.198  | 28.382 | 17.877 |
| H | 4.992  | 29.88  | 17.937 |
| O | 2.42   | 25.93  | 22.193 |
| H | 3.271  | 26.149 | 21.814 |
| H | 2.52   | 26.11  | 23.128 |
| O | 14.853 | 24.985 | 32.463 |
| H | 15.796 | 24.817 | 32.475 |
| H | 14.649 | 25.137 | 31.54  |
| O | 5.186  | 26.955 | 22.474 |
| H | 4.794  | 27.671 | 21.974 |
| H | 5.111  | 27.232 | 23.387 |
| O | 9.217  | 30.922 | 16.985 |
| H | 10.12  | 30.695 | 16.763 |
| H | 9.07   | 30.515 | 17.839 |
| O | 9.281  | 21.829 | 21.265 |
| H | 8.698  | 22.45  | 20.829 |
| H | 9.496  | 21.187 | 20.588 |
| O | 10.03  | 27.47  | 19.351 |
| H | 9.481  | 28.238 | 19.507 |
| H | 9.7    | 26.811 | 19.962 |
| O | 13.439 | 29.575 | 22.515 |
| H | 14.23  | 29.153 | 22.849 |
| H | 13.406 | 30.417 | 22.97  |
| O | 5.894  | 28.09  | 12.91  |
| H | 6.124  | 28.955 | 13.251 |
| H | 5.904  | 28.198 | 11.959 |
| O | 4.404  | 21.97  | 30.287 |
| H | 5.338  | 22.164 | 30.361 |

|   |        |        |        |
|---|--------|--------|--------|
| H | 3.989  | 22.826 | 30.181 |
| O | 9.389  | 9.913  | 29.44  |
| H | 10.315 | 10.145 | 29.37  |
| H | 8.94   | 10.751 | 29.546 |
| O | 6.125  | 16.796 | 31.663 |
| H | 6.387  | 16.525 | 32.543 |
| H | 5.205  | 17.044 | 31.753 |
| O | 7.242  | 22.664 | 30.659 |
| H | 7.301  | 21.799 | 31.065 |
| H | 7.797  | 23.222 | 31.204 |
| O | 5.568  | 7.496  | 24.794 |
| H | 6.054  | 7.753  | 24.011 |
| H | 5.149  | 6.668  | 24.556 |
| O | 10.637 | 25.718 | 34.172 |
| H | 11.256 | 26.152 | 33.585 |
| H | 11.142 | 25.542 | 34.966 |
| O | 8.322  | 22.971 | 26.654 |
| H | 7.712  | 23.213 | 27.351 |
| H | 8.996  | 23.651 | 26.679 |
| O | 4.743  | 11.206 | 29.318 |
| H | 4.246  | 10.418 | 29.537 |
| H | 4.84   | 11.172 | 28.366 |
| O | 7.694  | 13.829 | 26.977 |
| H | 6.99   | 13.731 | 26.335 |
| H | 8.345  | 14.375 | 26.537 |
| O | 7.121  | 15.997 | 28.933 |
| H | 6.785  | 15.262 | 28.42  |
| H | 6.596  | 15.99  | 29.733 |
| O | 3.119  | 18.475 | 18.734 |
| H | 3.746  | 17.906 | 18.288 |
| H | 2.54   | 18.786 | 18.038 |
| O | 8.495  | 8.206  | 19.487 |
| H | 9.292  | 8.272  | 18.961 |
| H | 8.139  | 7.343  | 19.276 |
| O | 8.48   | 19.274 | 32.209 |
| H | 7.707  | 19.438 | 32.749 |
| H | 9.123  | 19.915 | 32.51  |
| O | 6.032  | 20.944 | 32.651 |
| H | 5.35   | 20.305 | 32.448 |
| H | 5.564  | 21.775 | 32.738 |
| O | 4.097  | 19.322 | 28.952 |
| H | 4.788  | 19.211 | 28.3   |
| H | 4.032  | 20.269 | 29.074 |
| O | 7.118  | 8.55   | 22.881 |
| H | 7.965  | 8.684  | 23.306 |
| H | 7.173  | 9.058  | 22.072 |
| O | 3.798  | 21.594 | 23.096 |

|   |        |        |        |
|---|--------|--------|--------|
| H | 3.677  | 20.919 | 22.428 |
| H | 4.474  | 21.241 | 23.674 |
| O | 8.488  | 24.09  | 33.35  |
| H | 7.829  | 24.419 | 33.961 |
| H | 9.301  | 24.515 | 33.623 |
| O | 1.708  | 18.856 | 27.048 |
| H | 1.092  | 18.274 | 27.495 |
| H | 2.199  | 19.273 | 27.756 |
| O | 19.124 | 16.275 | 29.635 |
| H | 19.402 | 15.702 | 30.349 |
| H | 19.934 | 16.501 | 29.179 |
| O | 7.147  | 9.499  | 26.21  |
| H | 6.598  | 8.782  | 25.894 |
| H | 7.238  | 9.336  | 27.149 |
| O | 4.178  | 18.572 | 31.969 |
| H | 4.452  | 18.81  | 31.083 |
| H | 3.226  | 18.49  | 31.911 |
| O | 0.543  | 16.788 | 22.555 |
| H | 0.179  | 17.376 | 23.216 |
| H | -0.1   | 16.798 | 21.845 |
| O | 11.99  | 9.548  | 24.076 |
| H | 11.727 | 10.048 | 23.304 |
| H | 11.218 | 9.557  | 24.642 |
| O | 7.189  | 8.392  | 28.781 |
| H | 8.025  | 8.858  | 28.77  |
| H | 6.659  | 8.866  | 29.422 |
| O | 12.544 | 23.066 | 34.472 |
| H | 12.227 | 23.41  | 33.637 |
| H | 13.492 | 23.2   | 34.442 |
| O | 11.833 | 10.956 | 29.762 |
| H | 12.33  | 11.567 | 30.306 |
| H | 11.999 | 11.243 | 28.865 |
| O | 11.687 | 17.244 | 31.975 |
| H | 11.846 | 17.457 | 31.055 |
| H | 10.755 | 17.029 | 32.013 |
| O | 0.501  | 21.367 | 16.215 |
| H | -0.249 | 21.63  | 15.683 |
| H | 0.118  | 21.07  | 17.04  |
| O | 10.627 | 16.069 | 14.79  |
| H | 10.043 | 16.794 | 15.01  |
| H | 11.485 | 16.478 | 14.678 |
| O | 7.258  | 25.223 | 17.33  |
| H | 7.475  | 26.051 | 17.759 |
| H | 6.914  | 25.48  | 16.474 |
| O | 3.771  | 27.314 | 16.874 |
| H | 3.12   | 27.873 | 16.45  |
| H | 3.268  | 26.572 | 17.21  |

|   |        |        |        |
|---|--------|--------|--------|
| O | 2.147  | 23.887 | 12.856 |
| H | 2.515  | 24.767 | 12.931 |
| H | 1.356  | 23.911 | 13.393 |
| O | 2.333  | 8.525  | 20.951 |
| H | 2.882  | 9.206  | 20.562 |
| H | 2.071  | 8.884  | 21.799 |
| O | 7.461  | 13.033 | 12.694 |
| H | 7.663  | 12.851 | 11.777 |
| H | 7.797  | 12.273 | 13.17  |
| O | 4.969  | 14.157 | 19.343 |
| H | 5.51   | 14.933 | 19.496 |
| H | 5.238  | 13.844 | 18.479 |
| O | -0.166 | 18.377 | 14.564 |
| H | 0.606  | 18.325 | 15.128 |
| H | 0.185  | 18.566 | 13.694 |
| O | 5.269  | 16.773 | 17.728 |
| H | 5.056  | 17.109 | 16.857 |
| H | 5.421  | 15.838 | 17.593 |
| O | 6.669  | 17.421 | 14.285 |
| H | 5.782  | 17.404 | 14.643 |
| H | 7.076  | 16.619 | 14.614 |
| O | 3.784  | 19.597 | 21.196 |
| H | 3.605  | 19.147 | 20.371 |
| H | 3.726  | 18.91  | 21.861 |
| O | 3.905  | 17.383 | 12.472 |
| H | 4.436  | 16.586 | 12.481 |
| H | 4.476  | 18.055 | 12.844 |
| O | 3.485  | 18.341 | 8.264  |
| H | 2.83   | 19.039 | 8.275  |
| H | 3.121  | 17.661 | 8.831  |
| O | 6.793  | 20.993 | 16.992 |
| H | 7.708  | 21.26  | 17.083 |
| H | 6.708  | 20.232 | 17.566 |
| O | 10.889 | 20.232 | 15.06  |
| H | 10.994 | 20.785 | 14.286 |
| H | 11.766 | 20.18  | 15.439 |
| O | 6.589  | 20.397 | 27.023 |
| H | 7.251  | 21.087 | 27.054 |
| H | 6.629  | 19.987 | 27.887 |
| O | 9.581  | 23.657 | 7.735  |
| H | 8.647  | 23.449 | 7.725  |
| H | 9.693  | 24.292 | 7.027  |
| O | 10.311 | 13.591 | 14.341 |
| H | 11.167 | 13.391 | 13.961 |
| H | 10.27  | 14.547 | 14.347 |
| O | 22.708 | 27.764 | 19.976 |
| H | 23.029 | 28.05  | 20.831 |

|   |        |        |        |
|---|--------|--------|--------|
| H | 21.756 | 27.738 | 20.074 |
| O | -0.206 | 17.112 | 19.964 |
| H | -0.972 | 17.412 | 19.474 |
| H | 0.313  | 17.904 | 20.105 |
| O | 1.962  | 21.501 | 25.597 |
| H | 2.79   | 21.096 | 25.337 |
| H | 1.505  | 20.818 | 26.087 |
| O | 6.059  | 26.458 | 15.133 |
| H | 6.193  | 27.093 | 14.43  |
| H | 5.346  | 26.826 | 15.655 |
| O | 2.22   | 19.398 | 16.242 |
| H | 2.93   | 20.007 | 16.038 |
| H | 1.421  | 19.898 | 16.078 |
| O | 15.493 | 21.324 | 26.146 |
| H | 15.28  | 22.159 | 25.728 |
| H | 15.233 | 21.441 | 27.059 |
| O | 4.397  | 14.864 | 26.829 |
| H | 4.099  | 14.296 | 26.118 |
| H | 3.934  | 14.542 | 27.603 |
| O | 1.231  | 14.122 | 21.62  |
| H | 2.085  | 14.173 | 22.051 |
| H | 0.684  | 14.746 | 22.097 |
| O | 4.572  | 17.526 | 26.449 |
| H | 4.46   | 16.583 | 26.567 |
| H | 3.879  | 17.918 | 26.982 |
| O | 0.663  | 14.711 | 19.07  |
| H | 1.194  | 14.411 | 19.808 |
| H | 0.299  | 15.546 | 19.362 |
| O | 9.923  | 11.473 | 21.452 |
| H | 10.413 | 11.212 | 20.673 |
| H | 10.595 | 11.737 | 22.08  |
| O | 9.436  | 21.342 | 17.242 |
| H | 9.867  | 22.169 | 17.025 |
| H | 9.86   | 20.696 | 16.678 |
| O | 0.21   | 18.485 | 24.775 |
| H | -0.489 | 19.116 | 24.947 |
| H | 0.771  | 18.534 | 25.549 |
| O | 0.843  | 21.235 | 22.914 |
| H | 1.288  | 21.945 | 22.451 |
| H | 1.186  | 21.28  | 23.806 |
| O | 6.216  | 20.945 | 14.084 |
| H | 5.983  | 20.699 | 14.979 |
| H | 6.268  | 21.9   | 14.103 |
| O | 12.158 | 18.656 | 26.6   |
| H | 11.225 | 18.793 | 26.439 |
| H | 12.596 | 19.249 | 25.989 |
| O | 10.421 | 24.811 | 14.196 |

|   |        |        |        |
|---|--------|--------|--------|
| H | 10.087 | 25.32  | 13.456 |
| H | 11.367 | 24.955 | 14.177 |
| O | 13.184 | 21.666 | 21.343 |
| H | 13.397 | 20.762 | 21.574 |
| H | 12.751 | 21.6   | 20.492 |
| O | 4.004  | 23.979 | 24.467 |
| H | 4.953  | 24.109 | 24.476 |
| H | 3.884  | 23.118 | 24.067 |
| O | 16.458 | 16.79  | 6.819  |
| H | 16.051 | 17.121 | 6.019  |
| H | 17.349 | 16.558 | 6.557  |
| O | 8.511  | 15.399 | 24.713 |
| H | 8.957  | 16.163 | 24.349 |
| H | 7.882  | 15.144 | 24.038 |
| O | 1.333  | 12.491 | 14.201 |
| H | 0.715  | 11.957 | 13.701 |
| H | 0.791  | 12.943 | 14.847 |
| O | 8.856  | 11.454 | 17.814 |
| H | 9.752  | 11.453 | 18.151 |
| H | 8.62   | 12.381 | 17.765 |
| O | 11.364 | 11.877 | 18.304 |
| H | 11.246 | 12.788 | 18.033 |
| H | 12.181 | 11.607 | 17.884 |
| O | 2.885  | 21.121 | 13.352 |
| H | 3.436  | 21.175 | 14.133 |
| H | 2.753  | 22.032 | 13.088 |
| O | 11.853 | 25.183 | 18.281 |
| H | 11.887 | 24.91  | 19.198 |
| H | 11.671 | 26.122 | 18.318 |
| O | 3.625  | 24.452 | 29.114 |
| H | 3.218  | 24.258 | 28.27  |
| H | 3.49   | 25.392 | 29.234 |
| O | 6.652  | 23.165 | 7.563  |
| H | 5.94   | 23.625 | 7.117  |
| H | 6.424  | 22.239 | 7.486  |
| O | 6.307  | 20.313 | 6.796  |
| H | 5.732  | 20.347 | 7.561  |
| H | 7.167  | 20.091 | 7.153  |
| O | 5.727  | 16.408 | 23.623 |
| H | 4.838  | 16.737 | 23.752 |
| H | 6.176  | 16.598 | 24.447 |
| O | 2.533  | 16.056 | 10.036 |
| H | 2.797  | 16.626 | 10.757 |
| H | 2.542  | 15.175 | 10.411 |
| O | 5.582  | 11.634 | 25.208 |
| H | 5.295  | 11.249 | 24.379 |
| H | 6.379  | 11.152 | 25.432 |

|   |        |        |        |
|---|--------|--------|--------|
| O | 8.719  | 11.419 | 14.191 |
| H | 8.544  | 10.991 | 15.029 |
| H | 9.495  | 11.956 | 14.354 |
| O | 6.273  | 23.876 | 28.295 |
| H | 5.336  | 24.071 | 28.309 |
| H | 6.473  | 23.596 | 29.188 |
| O | 7.502  | 15.379 | 6.721  |
| H | 7.356  | 16.087 | 6.093  |
| H | 8.428  | 15.158 | 6.621  |
| O | 6.503  | 23.859 | 13.896 |
| H | 7.332  | 23.712 | 14.352 |
| H | 6.243  | 24.744 | 14.152 |
| O | 13.069 | 12.808 | 13.633 |
| H | 13.689 | 12.119 | 13.395 |
| H | 13.468 | 13.241 | 14.388 |
| O | 6.632  | 18.898 | 19.134 |
| H | 6.882  | 18.464 | 19.949 |
| H | 6.162  | 18.226 | 18.64  |
| O | 4.124  | 21.273 | 16.129 |
| H | 3.35   | 21.534 | 16.628 |
| H | 4.86   | 21.629 | 16.627 |
| O | 10.827 | 15.006 | 21.802 |
| H | 11.27  | 15.512 | 21.121 |
| H | 10.502 | 15.664 | 22.417 |
| O | 11.4   | 11.911 | 26.723 |
| H | 12.157 | 12.312 | 27.149 |
| H | 11.041 | 12.605 | 26.17  |
| O | 3.261  | 17.644 | 23.186 |
| H | 2.591  | 17.011 | 22.925 |
| H | 2.892  | 18.08  | 23.954 |
| O | 8.779  | 9.041  | 16.468 |
| H | 9.601  | 8.686  | 16.807 |
| H | 8.641  | 9.844  | 16.97  |
| O | 11.083 | 14.387 | 17.521 |
| H | 10.829 | 15.24  | 17.873 |
| H | 11.042 | 14.498 | 16.572 |
| O | 5.413  | 14.961 | 12.896 |
| H | 5.8    | 14.634 | 12.084 |
| H | 6.119  | 15.452 | 13.317 |
| O | 13.664 | 10.862 | 21.141 |
| H | 13.498 | 10.818 | 20.199 |
| H | 13.795 | 11.794 | 21.317 |
| O | 8.069  | 13.676 | 10.149 |
| H | 7.756  | 14.578 | 10.086 |
| H | 8.456  | 13.497 | 9.292  |
| O | 10.412 | 23.596 | 16.652 |
| H | 10.728 | 24.219 | 17.306 |



|   |        |        |        |
|---|--------|--------|--------|
| H | 10.385 | 24.097 | 15.837 |
| O | 7.234  | 18.164 | 22.144 |
| H | 7.628  | 18.837 | 22.698 |
| H | 6.779  | 17.586 | 22.756 |
| O | 3.627  | 10.43  | 19.518 |
| H | 4.527  | 10.501 | 19.2   |
| H | 3.137  | 11.062 | 18.991 |
| O | 2.237  | 25.187 | 17.955 |
| H | 2.404  | 24.257 | 18.109 |
| H | 1.633  | 25.202 | 17.212 |
| O | 5.534  | 13.837 | 16.786 |
| H | 6.369  | 13.912 | 16.323 |
| H | 4.893  | 13.663 | 16.096 |
| O | 5.395  | 8.355  | 14.092 |
| H | 5.816  | 8.521  | 13.249 |
| H | 5.609  | 9.123  | 14.622 |
| O | 3.976  | 13.497 | 14.707 |
| H | 4.316  | 14.117 | 14.062 |
| H | 3.096  | 13.285 | 14.395 |
| O | 9.675  | 23.694 | 10.775 |
| H | 9.012  | 23.8   | 10.092 |
| H | 9.783  | 24.572 | 11.142 |
| O | 5.391  | 21.911 | 19.72  |
| H | 5.166  | 21.406 | 20.501 |
| H | 5.839  | 21.286 | 19.15  |
| O | 12.569 | 24.472 | 7.065  |
| H | 12.548 | 24.004 | 6.23   |
| H | 12.711 | 25.387 | 6.823  |
| O | 14.777 | 24.405 | 4.634  |
| H | 14.044 | 25.004 | 4.5    |
| H | 14.368 | 23.581 | 4.9    |
| O | 12.741 | 18.302 | 11.121 |
| H | 11.822 | 18.561 | 11.053 |
| H | 13.228 | 19.063 | 10.804 |
| O | 7.156  | 17.716 | 5.352  |
| H | 6.524  | 18.238 | 5.846  |
| H | 7.011  | 17.965 | 4.439  |
| O | 1.5    | 18.804 | 12.493 |
| H | 2.136  | 18.091 | 12.448 |
| H | 2.028  | 19.587 | 12.65  |
| O | 5.821  | 22.106 | 11.546 |
| H | 6.054  | 21.497 | 12.247 |
| H | 5.888  | 22.972 | 11.949 |
| O | 5.855  | 18.556 | 9.479  |
| H | 5.073  | 18.545 | 8.927  |
| H | 5.735  | 19.315 | 10.049 |
| O | 2.897  | 22.367 | 18.607 |

|   |        |        |        |
|---|--------|--------|--------|
| H | 2.381  | 22.61  | 19.376 |
| H | 3.805  | 22.41  | 18.905 |
| O | 6.791  | 10.488 | 31.169 |
| H | 6.071  | 10.783 | 30.612 |
| H | 7.44   | 11.19  | 31.115 |
| O | 1.257  | 12.786 | 25.718 |
| H | 1.65   | 12.075 | 26.224 |
| H | 2.003  | 13.281 | 25.38  |
| O | 9.658  | 11.537 | 32.303 |
| H | 9.931  | 12.423 | 32.541 |
| H | 10.377 | 11.199 | 31.77  |
| O | 12.931 | 3.273  | 17.436 |
| H | 12.703 | 3.692  | 16.607 |
| H | 12.125 | 3.307  | 17.951 |
| O | 7.251  | 6.844  | 15.615 |
| H | 6.588  | 7.247  | 15.053 |
| H | 7.767  | 7.581  | 15.942 |
| O | 2.558  | 12.333 | 18.335 |
| H | 3.227  | 13.006 | 18.461 |
| H | 1.729  | 12.788 | 18.484 |
| O | 0.115  | 11.654 | 20.84  |
| H | 0.054  | 11.458 | 21.775 |
| H | 0.577  | 12.492 | 20.801 |
| O | 4.807  | 11.141 | 12.472 |
| H | 5.275  | 11.949 | 12.681 |
| H | 5.358  | 10.445 | 12.831 |
| O | 5.73   | 5.914  | 22.26  |
| H | 4.929  | 5.588  | 21.849 |
| H | 5.814  | 6.812  | 21.941 |
| O | 6.717  | 9.08   | 11.526 |
| H | 7.552  | 9.269  | 11.955 |
| H | 6.757  | 9.563  | 10.701 |
| O | 8.687  | 16.129 | 12.3   |
| H | 8.632  | 16.325 | 11.364 |
| H | 8.437  | 15.207 | 12.366 |
| O | 10.657 | 7.817  | 17.783 |
| H | 10.612 | 6.874  | 17.626 |
| H | 11.563 | 8.05   | 17.581 |
| O | 4.919  | 11.137 | 22.608 |
| H | 5.588  | 10.882 | 21.972 |
| H | 4.279  | 11.632 | 22.097 |
| O | 3.479  | 13.834 | 29.747 |
| H | 3.124  | 13.02  | 30.104 |
| H | 2.83   | 14.499 | 29.977 |
| O | 14.027 | 13.954 | 10.726 |
| H | 13.286 | 14.48  | 10.426 |
| H | 13.64  | 13.308 | 11.316 |

|   |       |        |        |
|---|-------|--------|--------|
| O | 4.941 | 10.54  | 15.659 |
| H | 4.883 | 10.595 | 16.613 |
| H | 4.572 | 11.367 | 15.349 |
| O | 6.883 | 16.082 | 9.474  |
| H | 6.474 | 16.936 | 9.614  |
| H | 6.708 | 15.881 | 8.554  |
| O | 6.333 | 11.028 | 9.802  |
| H | 5.588 | 11.333 | 9.284  |
| H | 6.387 | 11.646 | 10.53  |

**Table S20. PYP chromophore + 994 waters**

| Method   | Time(s) | iterations | E(eV) | f   |
|----------|---------|------------|-------|-----|
| CIS      | 5644.3  | 12         | 3.65  | 1.6 |
| TD-BLYP  | -       | -          | -     | -   |
| TD-B3LYP | -       | -          | -     | -   |

|   |        |        |        |
|---|--------|--------|--------|
| C | 22.967 | 16.81  | 19.507 |
| C | 24.27  | 16.774 | 18.931 |
| C | 24.617 | 15.671 | 18.139 |
| C | 23.681 | 14.66  | 17.949 |
| C | 22.419 | 14.608 | 18.558 |
| C | 22.092 | 15.731 | 19.368 |
| S | 22.3   | 18.226 | 20.373 |
| C | 21.107 | 18.737 | 19.24  |
| C | 19.881 | 18.611 | 19.724 |
| O | 21.503 | 18.978 | 18.056 |
| C | 18.678 | 18.857 | 18.895 |
| C | 17.412 | 18.7   | 19.379 |
| C | 16.267 | 18.768 | 18.424 |
| C | 15.007 | 18.753 | 18.949 |
| C | 14.627 | 18.622 | 20.339 |
| C | 15.744 | 18.498 | 21.241 |
| C | 17.075 | 18.511 | 20.793 |
| O | 13.416 | 18.649 | 20.62  |
| H | 25.016 | 17.532 | 19.156 |
| H | 25.561 | 15.727 | 17.603 |
| H | 23.959 | 13.891 | 17.234 |
| H | 21.774 | 13.742 | 18.433 |
| H | 21.138 | 15.665 | 19.885 |
| H | 19.762 | 18.159 | 20.708 |
| H | 18.901 | 19.227 | 17.895 |
| H | 16.528 | 18.974 | 17.391 |
| H | 14.139 | 18.825 | 18.303 |
| H | 15.6   | 18.345 | 22.305 |
| H | 17.886 | 18.502 | 21.514 |
| O | 29.51  | 28.373 | 25.52  |
| H | 29.611 | 29.237 | 25.919 |
| H | 30.004 | 27.785 | 26.093 |
| O | 34.175 | 30.912 | 21.616 |
| H | 33.77  | 30.855 | 22.481 |
| H | 34.654 | 30.089 | 21.52  |
| O | 29.914 | 28.662 | 20.051 |
| H | 28.96  | 28.597 | 20.094 |
| H | 30.203 | 28.55  | 20.956 |
| O | 28.022 | 19.477 | 33.619 |
| H | 28.041 | 19.045 | 32.765 |
| H | 27.758 | 18.789 | 34.229 |

|   |        |        |        |
|---|--------|--------|--------|
| O | 24.698 | 32.706 | 19.971 |
| H | 25.394 | 32.886 | 19.339 |
| H | 24.901 | 33.269 | 20.718 |
| O | 33.619 | 26.143 | 13.581 |
| H | 34.206 | 26.555 | 14.215 |
| H | 33.074 | 25.557 | 14.105 |
| O | 32.378 | 31.752 | 19.335 |
| H | 32.861 | 31.555 | 20.137 |
| H | 31.791 | 31.005 | 19.218 |
| O | 27.137 | 33.14  | 24.563 |
| H | 26.657 | 32.856 | 25.341 |
| H | 27.332 | 32.33  | 24.093 |
| O | 37.086 | 24.833 | 16.188 |
| H | 36.76  | 24.222 | 15.527 |
| H | 36.637 | 25.656 | 15.995 |
| O | 32.239 | 30.064 | 12.475 |
| H | 32.152 | 29.173 | 12.138 |
| H | 33.078 | 30.066 | 12.935 |
| O | 35.36  | 27.523 | 15.628 |
| H | 34.791 | 27.638 | 16.389 |
| H | 35.762 | 28.383 | 15.497 |
| O | 35.282 | 28.206 | 21.415 |
| H | 34.436 | 27.915 | 21.756 |
| H | 35.828 | 27.42  | 21.425 |
| O | 29.182 | 25.39  | 22.779 |
| H | 29.281 | 25.376 | 23.731 |
| H | 28.342 | 25.825 | 22.632 |
| O | 27.666 | 29.01  | 16.826 |
| H | 26.744 | 28.833 | 17.014 |
| H | 28.124 | 28.779 | 17.634 |
| O | 29.551 | 22.926 | 11.032 |
| H | 30.104 | 23.7   | 10.923 |
| H | 29.77  | 22.597 | 11.904 |
| O | 25.88  | 25.718 | 28.046 |
| H | 25.602 | 26.061 | 28.895 |
| H | 25.875 | 24.767 | 28.158 |
| O | 33.894 | 22.795 | 16.377 |
| H | 34.33  | 22.95  | 17.215 |
| H | 33.272 | 22.09  | 16.558 |
| O | 37.325 | 27.605 | 24.712 |
| H | 37.467 | 28.134 | 23.926 |
| H | 38.164 | 27.17  | 24.862 |
| O | 30.112 | 21.211 | 18.047 |
| H | 30.308 | 22.125 | 18.252 |
| H | 29.292 | 21.246 | 17.554 |
| O | 38.121 | 27.039 | 19.854 |
| H | 38.406 | 26.504 | 19.113 |

|   |        |        |        |
|---|--------|--------|--------|
| H | 38.841 | 26.981 | 20.482 |
| O | 20.126 | 33.539 | 20.94  |
| H | 19.734 | 34.225 | 21.481 |
| H | 20.662 | 34.013 | 20.304 |
| O | 19.885 | 32.771 | 12.143 |
| H | 20.771 | 32.669 | 11.795 |
| H | 19.349 | 32.984 | 11.379 |
| O | 29.311 | 29.116 | 11.863 |
| H | 29.862 | 29.614 | 12.467 |
| H | 29.085 | 28.321 | 12.346 |
| O | 30.508 | 30.914 | 26.443 |
| H | 30.433 | 31.861 | 26.56  |
| H | 31.416 | 30.716 | 26.673 |
| O | 32.416 | 27.988 | 8.365  |
| H | 32.494 | 27.804 | 9.301  |
| H | 31.775 | 28.696 | 8.313  |
| O | 33.21  | 27.724 | 10.993 |
| H | 33.281 | 27.022 | 11.639 |
| H | 34.102 | 27.84  | 10.666 |
| O | 32.027 | 24.623 | 10.821 |
| H | 32.335 | 24.527 | 11.722 |
| H | 32.71  | 24.214 | 10.289 |
| O | 22.739 | 27.389 | 5.844  |
| H | 22.093 | 26.689 | 5.936  |
| H | 23.584 | 26.939 | 5.866  |
| O | 30.25  | 23.229 | 6.634  |
| H | 30.147 | 24.042 | 7.129  |
| H | 29.37  | 22.856 | 6.598  |
| O | 24.075 | 15.499 | 29.422 |
| H | 24.789 | 14.887 | 29.603 |
| H | 23.281 | 15.008 | 29.631 |
| O | 25.931 | 16.537 | 32.89  |
| H | 26.584 | 16.212 | 33.509 |
| H | 25.185 | 15.946 | 32.996 |
| O | 32.393 | 16.843 | 31.041 |
| H | 31.962 | 16.242 | 31.649 |
| H | 33.317 | 16.817 | 31.293 |
| O | 26.423 | 14.107 | 29.296 |
| H | 26.561 | 13.165 | 29.395 |
| H | 26.809 | 14.318 | 28.445 |
| O | 27.383 | 22.332 | 28.542 |
| H | 28.134 | 22.88  | 28.772 |
| H | 27.568 | 21.487 | 28.951 |
| O | 21.777 | 5.504  | 33.359 |
| H | 20.978 | 5.576  | 32.837 |
| H | 22.363 | 6.166  | 32.991 |
| O | 30.787 | 18.473 | 34.319 |

|   |        |        |        |
|---|--------|--------|--------|
| H | 29.842 | 18.601 | 34.246 |
| H | 31.122 | 18.657 | 33.442 |
| O | 25.825 | 17.56  | 30.061 |
| H | 25.435 | 16.932 | 29.452 |
| H | 25.968 | 17.058 | 30.863 |
| O | 28.391 | 13.11  | 22.223 |
| H | 29.252 | 12.971 | 21.829 |
| H | 28.33  | 12.444 | 22.907 |
| O | 33.392 | 6.348  | 28.842 |
| H | 33.184 | 7.281  | 28.789 |
| H | 33.816 | 6.244  | 29.693 |
| O | 32.048 | 27.128 | 24.603 |
| H | 32.977 | 27.306 | 24.748 |
| H | 31.858 | 26.375 | 25.162 |
| O | 30.871 | 21.739 | 29.017 |
| H | 31.739 | 21.702 | 29.418 |
| H | 30.266 | 21.566 | 29.739 |
| O | 29.874 | 10.396 | 28.124 |
| H | 29.975 | 11.045 | 27.428 |
| H | 30.526 | 9.725  | 27.923 |
| O | 32.624 | 27.208 | 28.824 |
| H | 32.604 | 28.064 | 28.395 |
| H | 31.712 | 26.917 | 28.82  |
| O | 31.475 | 22.004 | 26.329 |
| H | 31.137 | 21.63  | 27.143 |
| H | 31.181 | 21.401 | 25.647 |
| O | 32.047 | 19.635 | 31.966 |
| H | 31.894 | 18.846 | 31.447 |
| H | 32.999 | 19.734 | 31.977 |
| O | 38.553 | 23.44  | 20.941 |
| H | 37.923 | 24.02  | 20.513 |
| H | 38.935 | 23.973 | 21.638 |
| O | 29.037 | 17.929 | 31.606 |
| H | 28.779 | 17.008 | 31.567 |
| H | 28.694 | 18.308 | 30.797 |
| O | 34.454 | 8.83   | 23.885 |
| H | 34.391 | 8.547  | 22.973 |
| H | 34.633 | 9.769  | 23.833 |
| O | 31.852 | 17.267 | 28.442 |
| H | 32.534 | 17.817 | 28.058 |
| H | 32.119 | 17.156 | 29.355 |
| O | 26.232 | 18.236 | 35.487 |
| H | 25.853 | 17.395 | 35.744 |
| H | 25.615 | 18.591 | 34.848 |
| O | 35.835 | 11.509 | 27.426 |
| H | 34.934 | 11.824 | 27.351 |
| H | 35.947 | 10.922 | 26.678 |

|   |        |        |        |
|---|--------|--------|--------|
| O | 29.307 | 17.709 | 27.704 |
| H | 30.224 | 17.766 | 27.973 |
| H | 29.295 | 18.067 | 26.817 |
| O | 32.759 | 25.507 | 32.009 |
| H | 32.321 | 26.357 | 31.964 |
| H | 32.617 | 25.118 | 31.146 |
| O | 33.497 | 14.65  | 32.473 |
| H | 32.661 | 14.185 | 32.436 |
| H | 33.904 | 14.349 | 33.285 |
| O | 32.147 | 12.024 | 32.525 |
| H | 31.734 | 11.406 | 31.922 |
| H | 31.809 | 11.779 | 33.387 |
| O | 34.618 | 25.542 | 27.636 |
| H | 33.93  | 25.98  | 28.137 |
| H | 34.407 | 25.733 | 26.722 |
| O | 33.709 | 17.406 | 9.427  |
| H | 34.618 | 17.29  | 9.703  |
| H | 33.76  | 17.531 | 8.48   |
| O | 24.938 | 16.847 | 11.925 |
| H | 24.601 | 17.235 | 12.732 |
| H | 25.689 | 16.325 | 12.206 |
| O | 32.469 | 14.752 | 21.385 |
| H | 33.348 | 14.759 | 21.766 |
| H | 32.195 | 13.836 | 21.431 |
| O | 30.816 | 19.132 | 13.418 |
| H | 30.974 | 18.346 | 13.94  |
| H | 31.54  | 19.153 | 12.792 |
| O | 30.284 | 15.257 | 11.884 |
| H | 31.234 | 15.279 | 11.994 |
| H | 30.077 | 14.33  | 11.768 |
| O | 36.186 | 20.699 | 18.464 |
| H | 36.55  | 20.393 | 19.295 |
| H | 35.267 | 20.432 | 18.492 |
| O | 32.263 | 11.353 | 17.063 |
| H | 32.41  | 10.514 | 17.499 |
| H | 31.311 | 11.441 | 17.027 |
| O | 33.28  | 18.588 | 15.193 |
| H | 33.815 | 17.822 | 15.401 |
| H | 32.532 | 18.235 | 14.713 |
| O | 33.563 | 9.022  | 21.216 |
| H | 34.106 | 9.499  | 20.588 |
| H | 32.971 | 8.501  | 20.675 |
| O | 26.315 | 12.269 | 19.428 |
| H | 25.586 | 12.142 | 20.035 |
| H | 26.005 | 11.901 | 18.601 |
| O | 24.721 | 18.014 | 7.559  |
| H | 23.933 | 18.514 | 7.772  |



|   |        |        |        |
|---|--------|--------|--------|
| H | 25.27  | 18.627 | 7.07   |
| O | 29.689 | 10.354 | 19.041 |
| H | 30.009 | 9.628  | 18.504 |
| H | 28.925 | 10.684 | 18.568 |
| O | 31.465 | 16.672 | 14.469 |
| H | 32.168 | 16.029 | 14.378 |
| H | 30.721 | 16.168 | 14.799 |
| O | 34.923 | 10.571 | 19.564 |
| H | 35.348 | 10.322 | 18.743 |
| H | 35.619 | 10.977 | 20.08  |
| O | 38.527 | 15.458 | 13.427 |
| H | 37.971 | 14.933 | 14.002 |
| H | 38.738 | 14.874 | 12.699 |
| O | 30.751 | 18.966 | 19.536 |
| H | 30.85  | 19.768 | 19.022 |
| H | 29.824 | 18.742 | 19.454 |
| O | 35.482 | 20.719 | 24.898 |
| H | 35.54  | 21.194 | 24.069 |
| H | 34.566 | 20.446 | 24.954 |
| O | 21.624 | 17.545 | 15.698 |
| H | 21.844 | 17.862 | 16.574 |
| H | 21.068 | 18.23  | 15.328 |
| O | 27.301 | 20.143 | 19.909 |
| H | 26.457 | 20.142 | 19.458 |
| H | 27.68  | 19.287 | 19.713 |
| O | 28.39  | 27.497 | 9.419  |
| H | 28.841 | 28.199 | 9.888  |
| H | 28.061 | 26.921 | 10.11  |
| O | 26.468 | 33.423 | 17.932 |
| H | 26.732 | 33.604 | 17.03  |
| H | 26.448 | 34.282 | 18.353 |
| O | 30.133 | 25.377 | 8.495  |
| H | 30.881 | 25.33  | 9.09   |
| H | 29.936 | 26.312 | 8.431  |
| O | 32.002 | 10.998 | 22.33  |
| H | 32.425 | 10.517 | 21.619 |
| H | 31.574 | 11.737 | 21.899 |
| O | 39.57  | 8.44   | 16.595 |
| H | 40.015 | 9.205  | 16.232 |
| H | 39.425 | 7.867  | 15.842 |
| O | 29.855 | 14.696 | 24.663 |
| H | 29.947 | 14.331 | 23.783 |
| H | 29.069 | 15.241 | 24.615 |
| O | 31.889 | 16.56  | 19.452 |
| H | 32.012 | 16.092 | 20.278 |
| H | 31.432 | 17.364 | 19.699 |
| O | 27.763 | 8.742  | 24.655 |

|   |        |        |        |
|---|--------|--------|--------|
| H | 27.349 | 7.971  | 25.04  |
| H | 28.329 | 8.392  | 23.967 |
| O | 34.644 | 10.558 | 9.453  |
| H | 35.402 | 10.214 | 8.98   |
| H | 33.93  | 9.961  | 9.231  |
| O | 37.732 | 9.429  | 18.503 |
| H | 38.216 | 9.367  | 19.327 |
| H | 38.329 | 9.07   | 17.847 |
| O | 30.544 | 12.556 | 20.427 |
| H | 30.218 | 11.819 | 19.909 |
| H | 30.792 | 13.214 | 19.777 |
| O | 34.526 | 20.736 | 7.123  |
| H | 34.765 | 21.156 | 6.297  |
| H | 33.854 | 20.098 | 6.882  |
| O | 32.612 | 20.608 | 17.136 |
| H | 31.709 | 20.388 | 17.362 |
| H | 32.89  | 19.906 | 16.547 |
| O | 28.345 | 21.116 | 22.423 |
| H | 29.083 | 21.585 | 22.033 |
| H | 27.883 | 20.733 | 21.678 |
| O | 37.856 | 19.551 | 20.509 |
| H | 37.953 | 19.844 | 21.415 |
| H | 38.75  | 19.529 | 20.167 |
| O | 28.626 | 7.578  | 18.14  |
| H | 29.131 | 7.399  | 18.934 |
| H | 27.944 | 6.906  | 18.134 |
| O | 34.025 | 19.389 | 20.825 |
| H | 33.18  | 19.249 | 21.253 |
| H | 33.999 | 18.825 | 20.053 |
| O | 24.737 | 20.209 | 19.019 |
| H | 24.671 | 20.885 | 18.345 |
| H | 23.926 | 19.706 | 18.934 |
| O | 24.407 | 14.872 | 14.057 |
| H | 23.679 | 14.548 | 14.587 |
| H | 24.691 | 15.67  | 14.502 |
| O | 27.84  | 14.376 | 19.85  |
| H | 27.952 | 14.292 | 20.797 |
| H | 27.401 | 13.566 | 19.588 |
| O | 29.304 | 15.125 | 15.496 |
| H | 29.712 | 15.071 | 16.36  |
| H | 28.974 | 14.241 | 15.332 |
| O | 30.935 | 23.768 | 18.813 |
| H | 31.045 | 24.586 | 19.299 |
| H | 31.712 | 23.253 | 19.032 |
| O | 22.565 | 11.422 | 7.263  |
| H | 21.77  | 10.969 | 6.982  |
| H | 23.22  | 10.729 | 7.341  |

|   |        |        |        |
|---|--------|--------|--------|
| O | 33.966 | 14.561 | 9.506  |
| H | 33.515 | 15.401 | 9.592  |
| H | 34.874 | 14.796 | 9.311  |
| O | 30.88  | 7.56   | 16.768 |
| H | 29.99  | 7.73   | 17.076 |
| H | 30.996 | 6.616  | 16.879 |
| O | 29.02  | 27.364 | 13.686 |
| H | 29.65  | 27.404 | 14.405 |
| H | 28.385 | 26.702 | 13.96  |
| O | 33.543 | 13.762 | 29.261 |
| H | 33.839 | 14.591 | 29.636 |
| H | 33.78  | 13.104 | 29.915 |
| O | 30.268 | 23.047 | 21.979 |
| H | 31.187 | 23.245 | 21.797 |
| H | 29.889 | 23.888 | 22.238 |
| O | 37.26  | 17.031 | 28.555 |
| H | 36.942 | 16.299 | 28.026 |
| H | 36.467 | 17.49  | 28.831 |
| O | 27.648 | 21.192 | 16.796 |
| H | 27.35  | 20.499 | 16.206 |
| H | 26.861 | 21.705 | 16.979 |
| O | 29.094 | 23.158 | 15.712 |
| H | 28.684 | 22.32  | 15.928 |
| H | 29.846 | 22.923 | 15.168 |
| O | 34.864 | 20.878 | 14.109 |
| H | 35.24  | 20.289 | 13.454 |
| H | 34.281 | 20.321 | 14.625 |
| O | 33.093 | 26.646 | 22.107 |
| H | 32.438 | 26.688 | 22.803 |
| H | 33.395 | 25.738 | 22.117 |
| O | 35.958 | 10.673 | 13.915 |
| H | 35.175 | 10.32  | 13.493 |
| H | 35.815 | 10.525 | 14.85  |
| O | 32.982 | 14.146 | 13.03  |
| H | 33.495 | 13.501 | 12.543 |
| H | 33.138 | 13.931 | 13.95  |
| O | 29.29  | 12.914 | 5.866  |
| H | 28.755 | 13.501 | 5.332  |
| H | 29.356 | 13.355 | 6.713  |
| O | 27.587 | 22.533 | 6.576  |
| H | 27.384 | 22.656 | 7.503  |
| H | 26.773 | 22.205 | 6.193  |
| O | 35.239 | 24.226 | 22.752 |
| H | 35.057 | 23.301 | 22.584 |
| H | 35.71  | 24.522 | 21.974 |
| O | 35.225 | 21.368 | 9.799  |
| H | 34.727 | 22.182 | 9.874  |

|   |        |        |        |
|---|--------|--------|--------|
| H | 34.904 | 20.965 | 8.992  |
| O | 24.198 | 19.84  | 23.687 |
| H | 24.475 | 20.696 | 23.361 |
| H | 23.265 | 19.795 | 23.477 |
| O | 35.223 | 17.396 | 7.188  |
| H | 35.424 | 16.46  | 7.207  |
| H | 35.023 | 17.579 | 6.27   |
| O | 34.688 | 19.884 | 31.798 |
| H | 35.036 | 19.186 | 32.353 |
| H | 35.224 | 19.85  | 31.006 |
| O | 27.776 | 19.346 | 29.523 |
| H | 28.367 | 18.91  | 28.909 |
| H | 27.057 | 18.725 | 29.643 |
| O | 31.049 | 20.49  | 23.466 |
| H | 31.305 | 20.855 | 22.619 |
| H | 30.106 | 20.348 | 23.391 |
| O | 40.878 | 17.404 | 15.312 |
| H | 40.335 | 18.129 | 15.623 |
| H | 40.377 | 17.022 | 14.591 |
| O | 36.167 | 24.994 | 20.402 |
| H | 36.008 | 24.584 | 19.552 |
| H | 36.629 | 25.806 | 20.193 |
| O | 33.02  | 19.355 | 24.959 |
| H | 32.359 | 19.651 | 24.333 |
| H | 32.922 | 18.403 | 24.978 |
| O | 35.863 | 19.669 | 11.703 |
| H | 35.851 | 20.058 | 10.828 |
| H | 36.775 | 19.412 | 11.839 |
| O | 34.337 | 17.381 | 18.699 |
| H | 33.413 | 17.138 | 18.745 |
| H | 34.589 | 17.193 | 17.794 |
| O | 37.085 | 11.712 | 11.01  |
| H | 37.46  | 11.144 | 11.684 |
| H | 36.145 | 11.709 | 11.19  |
| O | 23.676 | 30.073 | 25.75  |
| H | 23.953 | 29.785 | 26.619 |
| H | 24.338 | 29.716 | 25.157 |
| O | 36.349 | 14.37  | 16.428 |
| H | 35.776 | 13.647 | 16.683 |
| H | 36.874 | 14.547 | 17.209 |
| O | 30.684 | 26.111 | 20.225 |
| H | 30.14  | 25.942 | 20.994 |
| H | 30.563 | 27.043 | 20.045 |
| O | 28.875 | 25.274 | 17.405 |
| H | 29.024 | 24.584 | 16.759 |
| H | 28.96  | 24.832 | 18.25  |
| O | 27.561 | 17.119 | 16.412 |

|   |        |        |        |
|---|--------|--------|--------|
| H | 27.549 | 17.874 | 15.824 |
| H | 28.209 | 16.527 | 16.028 |
| O | 28.503 | 15.262 | 30.777 |
| H | 29.239 | 14.89  | 30.291 |
| H | 27.726 | 14.937 | 30.321 |
| O | 25.055 | 10.896 | 15.923 |
| H | 24.361 | 10.877 | 15.264 |
| H | 25.56  | 10.099 | 15.762 |
| O | 27.663 | 15.508 | 12.777 |
| H | 28.527 | 15.453 | 12.369 |
| H | 27.845 | 15.681 | 13.701 |
| O | 32.027 | 5.895  | 8.845  |
| H | 31.623 | 6.611  | 8.355  |
| H | 32.166 | 5.207  | 8.194  |
| O | 26.642 | 8.919  | 16.155 |
| H | 27.111 | 8.832  | 15.325 |
| H | 27.2   | 8.476  | 16.794 |
| O | 34.7   | 8.647  | 26.694 |
| H | 34.791 | 8.629  | 25.741 |
| H | 34.874 | 7.746  | 26.968 |
| O | 30.043 | 28.447 | 22.688 |
| H | 30.94  | 28.47  | 23.023 |
| H | 29.544 | 28     | 23.371 |
| O | 32.886 | 23.254 | 20.961 |
| H | 33.701 | 22.752 | 20.958 |
| H | 33.126 | 24.103 | 20.589 |
| O | 30.396 | 12.661 | 26.533 |
| H | 29.905 | 13.14  | 27.202 |
| H | 30.326 | 13.206 | 25.749 |
| O | 33.891 | 19.05  | 27.854 |
| H | 33.348 | 19.395 | 27.144 |
| H | 34.755 | 19.431 | 27.701 |
| O | 35.148 | 22.79  | 28.574 |
| H | 35.829 | 23.243 | 29.072 |
| H | 34.691 | 23.488 | 28.105 |
| O | 30.413 | 27.058 | 16.275 |
| H | 29.895 | 26.477 | 16.832 |
| H | 31.257 | 26.616 | 16.186 |
| O | 28.936 | 30.943 | 22.42  |
| H | 28.1   | 30.695 | 22.815 |
| H | 29.402 | 30.115 | 22.306 |
| O | 22.286 | 8.889  | 11.272 |
| H | 23.098 | 9.247  | 10.913 |
| H | 22.562 | 8.394  | 12.043 |
| O | 34.969 | 16.574 | 15.88  |
| H | 35.407 | 15.772 | 16.167 |
| H | 35.513 | 16.901 | 15.163 |

|   |        |        |        |
|---|--------|--------|--------|
| O | 26.164 | 11.202 | 7.345  |
| H | 25.545 | 10.472 | 7.333  |
| H | 25.8   | 11.815 | 7.984  |
| O | 34.181 | 9.003  | 12.582 |
| H | 33.626 | 8.682  | 13.292 |
| H | 34.185 | 8.293  | 11.941 |
| O | 36.64  | 14.614 | 27.231 |
| H | 37.4   | 14.199 | 26.823 |
| H | 36.183 | 13.897 | 27.67  |
| O | 32.535 | 25.399 | 16.466 |
| H | 32.791 | 25.655 | 17.352 |
| H | 33.049 | 24.612 | 16.286 |
| O | 29.654 | 20.42  | 6.361  |
| H | 29.741 | 21.306 | 6.711  |
| H | 29.071 | 19.975 | 6.976  |
| O | 30.372 | 17.503 | 1.53   |
| H | 30.093 | 18.418 | 1.559  |
| H | 31.096 | 17.453 | 2.155  |
| O | 27.272 | 23.704 | 9.485  |
| H | 26.778 | 24.292 | 10.057 |
| H | 28.073 | 23.512 | 9.972  |
| O | 33.233 | 22.995 | 13.617 |
| H | 33.86  | 22.392 | 13.218 |
| H | 33.294 | 22.817 | 14.555 |
| O | 33.064 | 19.005 | 11.754 |
| H | 33.956 | 19.326 | 11.886 |
| H | 33.051 | 18.7   | 10.847 |
| O | 31.386 | 15.609 | 4.205  |
| H | 30.585 | 15.185 | 3.898  |
| H | 31.311 | 15.6   | 5.159  |
| O | 30.605 | 17.651 | 8.116  |
| H | 29.808 | 18.112 | 7.853  |
| H | 30.494 | 17.497 | 9.054  |
| O | 31.855 | 12.147 | 4.692  |
| H | 31.054 | 12.482 | 5.094  |
| H | 32.561 | 12.505 | 5.231  |
| O | 29.426 | 12.968 | 2.092  |
| H | 29.581 | 13.019 | 3.035  |
| H | 28.608 | 12.477 | 2.01   |
| O | 33.099 | 13.381 | 7.205  |
| H | 33.436 | 13.551 | 8.085  |
| H | 32.489 | 14.099 | 7.04   |
| O | 31.29  | 15.336 | 7.075  |
| H | 31.237 | 16.239 | 7.387  |
| H | 30.501 | 14.916 | 7.417  |
| O | 28.183 | 20.556 | 11.69  |
| H | 27.261 | 20.81  | 11.729 |

|   |        |        |        |
|---|--------|--------|--------|
| H | 28.556 | 21.113 | 11.007 |
| O | 28.184 | 19.383 | 14.719 |
| H | 27.476 | 19.592 | 14.11  |
| H | 28.984 | 19.585 | 14.233 |
| O | 36.55  | 14.959 | 8.939  |
| H | 36.879 | 14.234 | 8.408  |
| H | 37.281 | 15.576 | 8.982  |
| O | 37.462 | 12.96  | 6.805  |
| H | 36.636 | 12.624 | 6.459  |
| H | 37.694 | 13.679 | 6.217  |
| O | 36.976 | 19.434 | 7.881  |
| H | 36.636 | 18.56  | 7.691  |
| H | 36.277 | 20.028 | 7.608  |
| O | 35.485 | 24.696 | 11.699 |
| H | 35.999 | 24.911 | 10.921 |
| H | 35.086 | 25.526 | 11.96  |
| O | 26.657 | 18.865 | 3.959  |
| H | 26.916 | 19.091 | 3.065  |
| H | 27.47  | 18.59  | 4.382  |
| O | 24.872 | 12.144 | 9.43   |
| H | 24.826 | 12.666 | 10.231 |
| H | 23.958 | 11.996 | 9.188  |
| O | 27.268 | 11.411 | 1.54   |
| H | 26.413 | 11.828 | 1.649  |
| H | 27.108 | 10.485 | 1.725  |
| O | 33.348 | 23.688 | 8.391  |
| H | 33.433 | 22.882 | 7.882  |
| H | 32.477 | 24.019 | 8.171  |
| O | 29.221 | 6.522  | 10.379 |
| H | 28.456 | 5.947  | 10.342 |
| H | 29.57  | 6.513  | 9.487  |
| O | 33.971 | 12.512 | 11.025 |
| H | 34.129 | 13.342 | 10.575 |
| H | 34.285 | 11.845 | 10.414 |
| O | 24.271 | 2.462  | 24.324 |
| H | 24.276 | 2.433  | 25.281 |
| H | 23.367 | 2.68   | 24.096 |
| O | 34.394 | 11.785 | 30.888 |
| H | 34.462 | 10.834 | 30.8   |
| H | 33.854 | 11.915 | 31.668 |
| O | 33.118 | 5.384  | 21.004 |
| H | 33.837 | 5.702  | 20.458 |
| H | 33.437 | 5.483  | 21.901 |
| O | 34.115 | 11.559 | 24.22  |
| H | 33.339 | 11.165 | 23.821 |
| H | 33.861 | 11.723 | 25.128 |
| O | 29.064 | 5.922  | 23.31  |

|   |        |        |        |
|---|--------|--------|--------|
| H | 29.919 | 5.734  | 23.696 |
| H | 28.435 | 5.683  | 23.992 |
| O | 27.828 | 5.596  | 25.887 |
| H | 28.47  | 5.873  | 26.541 |
| H | 27.619 | 4.693  | 26.125 |
| O | 26.832 | 5.189  | 21.622 |
| H | 27.252 | 5.047  | 20.773 |
| H | 27.56  | 5.309  | 22.232 |
| O | 27.915 | 9.266  | 11.271 |
| H | 28.66  | 9.642  | 10.801 |
| H | 28.008 | 8.321  | 11.15  |
| O | 30.544 | 2.942  | 8.997  |
| H | 31.279 | 2.701  | 9.561  |
| H | 29.809 | 3.061  | 9.598  |
| O | 35.791 | 1.911  | 17.642 |
| H | 36.156 | 2.247  | 16.823 |
| H | 35.519 | 1.017  | 17.433 |
| O | 33.569 | 2.102  | 18.993 |
| H | 34.438 | 2.017  | 18.6   |
| H | 33.083 | 2.656  | 18.382 |
| O | 29.43  | 4.772  | 14.03  |
| H | 30.115 | 5.18   | 14.559 |
| H | 29.462 | 5.24   | 13.195 |
| O | 31.206 | 3.357  | 19.326 |
| H | 31.592 | 3.95   | 19.971 |
| H | 31.079 | 2.536  | 19.801 |
| O | 34.216 | 13.143 | 17.637 |
| H | 33.781 | 13.513 | 18.405 |
| H | 33.591 | 12.503 | 17.294 |
| O | 31.702 | 10.129 | 12.535 |
| H | 31.309 | 9.286  | 12.76  |
| H | 32.645 | 9.98   | 12.605 |
| O | 30.057 | 0.978  | 21.063 |
| H | 30.471 | 0.117  | 21.002 |
| H | 29.124 | 0.788  | 21.16  |
| O | 24.574 | 1.164  | 20.131 |
| H | 23.643 | 0.949  | 20.082 |
| H | 24.638 | 1.789  | 20.853 |
| O | 36.861 | 8.365  | 12.361 |
| H | 37.085 | 8.591  | 11.459 |
| H | 35.918 | 8.519  | 12.419 |
| O | 26.913 | 4.285  | 15.371 |
| H | 26.952 | 3.337  | 15.496 |
| H | 27.829 | 4.556  | 15.306 |
| O | 33.035 | 8.455  | 8.69   |
| H | 32.114 | 8.259  | 8.861  |
| H | 33.169 | 8.202  | 7.777  |



|   |        |        |        |
|---|--------|--------|--------|
| O | 24.191 | 6.078  | 28.866 |
| H | 23.464 | 5.96   | 29.478 |
| H | 23.769 | 6.211  | 28.017 |
| O | 34.781 | 6.16   | 16.103 |
| H | 35.49  | 6.193  | 16.745 |
| H | 34.378 | 5.302  | 16.235 |
| O | 30.626 | 7.601  | 12.479 |
| H | 30.147 | 7.318  | 11.699 |
| H | 31.486 | 7.19   | 12.393 |
| O | 32.572 | 8.073  | 14.925 |
| H | 33.368 | 7.745  | 15.343 |
| H | 31.863 | 7.787  | 15.501 |
| O | 27.036 | 1.61   | 16.375 |
| H | 27.747 | 1.122  | 16.791 |
| H | 27.079 | 1.356  | 15.453 |
| O | 29.913 | 6.883  | 27.251 |
| H | 30.44  | 6.318  | 27.816 |
| H | 30.516 | 7.572  | 26.973 |
| O | 32.912 | 2.826  | 10.65  |
| H | 33.847 | 2.633  | 10.592 |
| H | 32.872 | 3.755  | 10.878 |
| O | 36.165 | 3.679  | 19.751 |
| H | 35.837 | 3.062  | 20.405 |
| H | 36.291 | 3.15   | 18.964 |
| O | 32.539 | 7.536  | 19.134 |
| H | 32.199 | 7.545  | 18.239 |
| H | 33.388 | 7.099  | 19.063 |
| O | 32.493 | 5.52   | 11.477 |
| H | 33.429 | 5.702  | 11.563 |
| H | 32.308 | 5.65   | 10.547 |
| O | 25.355 | 8.517  | 22.306 |
| H | 25.206 | 7.892  | 23.016 |
| H | 26.306 | 8.621  | 22.275 |
| O | 31.904 | 8.888  | 27.088 |
| H | 31.792 | 8.912  | 26.138 |
| H | 32.853 | 8.878  | 27.217 |
| O | 22.716 | 6.274  | 26.162 |
| H | 22.311 | 6.96   | 26.692 |
| H | 22.078 | 6.099  | 25.47  |
| O | 37.877 | 7.338  | 14.681 |
| H | 38.283 | 6.537  | 14.348 |
| H | 37.572 | 7.796  | 13.898 |
| O | 35.106 | 6.298  | 19.48  |
| H | 35.449 | 5.405  | 19.525 |
| H | 35.801 | 6.84   | 19.854 |
| O | 29.441 | 10.867 | 16.12  |
| H | 29.416 | 10.227 | 15.408 |

|   |        |        |        |
|---|--------|--------|--------|
| H | 28.616 | 11.345 | 16.04  |
| O | 32.208 | 2.876  | 13.624 |
| H | 32.253 | 3.774  | 13.295 |
| H | 31.978 | 2.351  | 12.857 |
| O | 31.122 | 12.532 | 11.065 |
| H | 31.196 | 11.965 | 11.832 |
| H | 32.015 | 12.84  | 10.907 |
| O | 28.552 | 8.795  | 13.93  |
| H | 29.499 | 8.672  | 13.861 |
| H | 28.268 | 8.976  | 13.034 |
| O | 33.41  | 7.438  | 6.16   |
| H | 32.916 | 6.781  | 5.67   |
| H | 33.553 | 8.147  | 5.533  |
| O | 29.73  | 10.361 | 9.699  |
| H | 29.491 | 10.671 | 8.826  |
| H | 30.535 | 10.834 | 9.91   |
| O | 37.802 | 8.439  | 8.903  |
| H | 38.359 | 7.687  | 9.103  |
| H | 38.357 | 9.201  | 9.074  |
| O | 35.867 | 3.581  | 11.329 |
| H | 36.52  | 2.987  | 11.7   |
| H | 35.57  | 4.105  | 12.072 |
| O | 30.307 | 8.048  | 7.832  |
| H | 29.872 | 7.646  | 7.079  |
| H | 29.927 | 8.925  | 7.887  |
| O | 38.323 | 11.117 | 8.678  |
| H | 38.024 | 11.743 | 8.019  |
| H | 37.953 | 11.439 | 9.5    |
| O | 29.103 | 6.897  | 3.001  |
| H | 29.072 | 5.973  | 2.754  |
| H | 29.248 | 6.888  | 3.947  |
| O | 33.605 | 16.643 | 2.771  |
| H | 34.056 | 15.852 | 2.475  |
| H | 32.941 | 16.326 | 3.382  |
| O | 22.492 | 8.265  | 4.963  |
| H | 21.699 | 8.599  | 5.382  |
| H | 22.78  | 8.978  | 4.393  |
| O | 22.61  | 25.651 | 33.633 |
| H | 23.291 | 25.394 | 33.011 |
| H | 22.05  | 24.878 | 33.708 |
| O | 15.325 | 23.619 | 35.24  |
| H | 15.641 | 23.96  | 34.403 |
| H | 15.405 | 22.669 | 35.156 |
| O | 9.173  | 27.776 | 28.296 |
| H | 8.972  | 27.205 | 29.038 |
| H | 8.339  | 28.194 | 28.083 |
| O | 26.718 | 26.606 | 22.365 |

|   |        |        |        |
|---|--------|--------|--------|
| H | 26.922 | 27.468 | 22.002 |
| H | 25.77  | 26.522 | 22.263 |
| O | 12.169 | 19.132 | 33.848 |
| H | 12.133 | 18.575 | 33.07  |
| H | 11.785 | 19.962 | 33.566 |
| O | 20.485 | 24.189 | 26.946 |
| H | 19.824 | 23.499 | 26.989 |
| H | 20.982 | 24.095 | 27.759 |
| O | 14.188 | 29.92  | 32.979 |
| H | 14.037 | 30.261 | 32.097 |
| H | 14.084 | 28.973 | 32.891 |
| O | 20.447 | 31.448 | 31.344 |
| H | 20.853 | 30.957 | 32.059 |
| H | 21.131 | 32.051 | 31.05  |
| O | 19.094 | 35.199 | 23.004 |
| H | 19.708 | 35.718 | 23.524 |
| H | 18.709 | 35.826 | 22.393 |
| O | 14.828 | 27.486 | 35.429 |
| H | 15.48  | 26.875 | 35.774 |
| H | 14.651 | 28.083 | 36.155 |
| O | 13.474 | 28.382 | 29.119 |
| H | 14.419 | 28.431 | 29.264 |
| H | 13.146 | 29.24  | 29.391 |
| O | 25.402 | 33.837 | 22.39  |
| H | 25.223 | 34.659 | 22.847 |
| H | 26.288 | 33.599 | 22.662 |
| O | 22.005 | 21.03  | 34.568 |
| H | 21.915 | 20.422 | 35.303 |
| H | 22.446 | 21.793 | 34.941 |
| O | 15.726 | 30.467 | 29.749 |
| H | 16.302 | 30.295 | 29.004 |
| H | 16.307 | 30.45  | 30.51  |
| O | 18.257 | 28.509 | 30.224 |
| H | 18.347 | 29.452 | 30.087 |
| H | 19.118 | 28.152 | 30.008 |
| O | 17.616 | 30.699 | 27.489 |
| H | 18.476 | 30.45  | 27.83  |
| H | 17.308 | 29.921 | 27.025 |
| O | 20.676 | 27.261 | 30.028 |
| H | 20.794 | 26.311 | 30.033 |
| H | 21.132 | 27.563 | 30.814 |
| O | 20.288 | 30.264 | 27.478 |
| H | 21.034 | 30.563 | 27.997 |
| H | 20.599 | 29.467 | 27.049 |
| O | 17.431 | 24.711 | 33.291 |
| H | 18.114 | 24.165 | 32.902 |
| H | 17.703 | 25.608 | 33.098 |

|   |        |        |        |
|---|--------|--------|--------|
| O | 6.966  | 29.291 | 27.904 |
| H | 6.509  | 28.464 | 27.747 |
| H | 6.272  | 29.909 | 28.133 |
| O | 14.234 | 29.451 | 25.8   |
| H | 13.729 | 28.82  | 25.288 |
| H | 13.582 | 30.076 | 26.118 |
| O | 21.841 | 25.67  | 24.919 |
| H | 21.461 | 24.958 | 25.433 |
| H | 22.774 | 25.46  | 24.871 |
| O | 29.046 | 24.005 | 30.607 |
| H | 28.918 | 23.161 | 31.04  |
| H | 28.924 | 24.652 | 31.302 |
| O | 8.407  | 27.699 | 32.139 |
| H | 9.255  | 28.142 | 32.14  |
| H | 7.968  | 28.018 | 32.928 |
| O | 23.943 | 26.468 | 22.389 |
| H | 23.24  | 27.114 | 22.464 |
| H | 23.571 | 25.769 | 21.852 |
| O | 12.238 | 24.196 | 24.379 |
| H | 12.264 | 25.01  | 23.876 |
| H | 13.158 | 23.962 | 24.504 |
| O | 14.585 | 30.731 | 16.435 |
| H | 15.025 | 30.964 | 15.618 |
| H | 15.297 | 30.594 | 17.06  |
| O | 13.619 | 27.917 | 18.44  |
| H | 14.291 | 28.521 | 18.757 |
| H | 13.651 | 27.182 | 19.051 |
| O | 18.176 | 26.857 | 16.936 |
| H | 17.888 | 25.989 | 17.218 |
| H | 17.621 | 27.464 | 17.426 |
| O | 13.345 | 33.294 | 13.434 |
| H | 13.166 | 33.928 | 12.739 |
| H | 12.48  | 32.992 | 13.711 |
| O | 22.744 | 34.799 | 18.6   |
| H | 22.875 | 35.169 | 19.473 |
| H | 23.099 | 33.912 | 18.659 |
| O | 13.323 | 32.607 | 17.845 |
| H | 13.569 | 33.321 | 17.257 |
| H | 13.903 | 31.886 | 17.601 |
| O | 24.608 | 30.968 | 17.556 |
| H | 24.77  | 31.723 | 16.991 |
| H | 24.687 | 31.312 | 18.446 |
| O | 13.129 | 20.587 | 24.819 |
| H | 14.035 | 20.781 | 25.059 |
| H | 12.692 | 21.438 | 24.822 |
| O | 23.146 | 31.118 | 22.018 |
| H | 22.361 | 31.601 | 22.276 |

|   |        |        |        |
|---|--------|--------|--------|
| H | 23.577 | 31.685 | 21.38  |
| O | 21.337 | 32.013 | 9.669  |
| H | 20.64  | 32.488 | 9.214  |
| H | 22.1   | 32.105 | 9.099  |
| O | 22.669 | 34.006 | 23.243 |
| H | 23.585 | 33.901 | 22.983 |
| H | 22.494 | 33.256 | 23.811 |
| O | 21.864 | 31.131 | 14.358 |
| H | 22.43  | 31.33  | 13.612 |
| H | 22.398 | 30.572 | 14.922 |
| O | 14.275 | 34.472 | 16.202 |
| H | 13.494 | 34.878 | 15.827 |
| H | 14.992 | 35.052 | 15.948 |
| O | 28.649 | 27.805 | 29.073 |
| H | 28.908 | 28.701 | 29.29  |
| H | 28.182 | 27.496 | 29.849 |
| O | 8.312  | 34.056 | 16.279 |
| H | 8.903  | 33.561 | 16.847 |
| H | 8.181  | 33.49  | 15.518 |
| O | 15.224 | 33.394 | 22.1   |
| H | 14.403 | 33.115 | 21.695 |
| H | 15.834 | 32.678 | 21.924 |
| O | 17.794 | 32.381 | 17.737 |
| H | 18.417 | 32.355 | 18.463 |
| H | 17.235 | 31.616 | 17.873 |
| O | 15.333 | 33.635 | 26.635 |
| H | 15.481 | 34.081 | 25.801 |
| H | 16.148 | 33.762 | 27.122 |
| O | 10.774 | 32     | 11.963 |
| H | 11.366 | 31.825 | 11.231 |
| H | 10.381 | 32.847 | 11.756 |
| O | 18.578 | 33.208 | 26.823 |
| H | 18.229 | 32.32  | 26.889 |
| H | 19.453 | 33.151 | 27.207 |
| O | 21.06  | 28.306 | 25.498 |
| H | 20.998 | 27.406 | 25.18  |
| H | 21.99  | 28.522 | 25.427 |
| O | 8.368  | 24.538 | 22.244 |
| H | 8.26   | 25.485 | 22.33  |
| H | 8.09   | 24.345 | 21.349 |
| O | 28.948 | 33.425 | 20.817 |
| H | 29.123 | 32.657 | 21.361 |
| H | 28.624 | 34.084 | 21.43  |
| O | 5.765  | 27.763 | 9.94   |
| H | 6.481  | 28.139 | 9.428  |
| H | 5.195  | 27.352 | 9.289  |
| O | 14.801 | 26.026 | 20.08  |

|   |        |        |        |
|---|--------|--------|--------|
| H | 15.168 | 25.155 | 19.923 |
| H | 14.58  | 26.028 | 21.011 |
| O | 11.302 | 33.766 | 26.54  |
| H | 11.901 | 34.38  | 26.116 |
| H | 11.784 | 33.449 | 27.303 |
| O | 19.937 | 34.792 | 13.778 |
| H | 19.457 | 34.763 | 14.606 |
| H | 19.839 | 33.912 | 13.414 |
| O | 11.605 | 29.867 | 17.285 |
| H | 11.941 | 29.176 | 17.856 |
| H | 12.281 | 29.973 | 16.615 |
| O | 11.77  | 26.697 | 27.758 |
| H | 12.281 | 27.238 | 28.36  |
| H | 10.88  | 27.045 | 27.821 |
| O | 16.841 | 21.428 | 19.485 |
| H | 17.664 | 21.307 | 19.96  |
| H | 16.432 | 20.562 | 19.491 |
| O | 18.218 | 30.917 | 13.635 |
| H | 19.02  | 31.44  | 13.633 |
| H | 17.531 | 31.533 | 13.89  |
| O | 19.683 | 31.273 | 19.221 |
| H | 20.549 | 31.558 | 19.514 |
| H | 19.263 | 30.935 | 20.012 |
| O | 26.17  | 30.821 | 28.221 |
| H | 25.545 | 30.107 | 28.09  |
| H | 26.487 | 30.7   | 29.116 |
| O | 23.848 | 33.568 | 16.213 |
| H | 23.958 | 34.397 | 16.679 |
| H | 22.989 | 33.639 | 15.797 |
| O | 12.027 | 31.117 | 27.063 |
| H | 11.365 | 31.8   | 27.175 |
| H | 11.555 | 30.392 | 26.654 |
| O | 16.147 | 31.036 | 24.68  |
| H | 15.607 | 30.323 | 25.021 |
| H | 16.072 | 31.728 | 25.337 |
| O | 15.518 | 30.124 | 19.132 |
| H | 15.1   | 30.613 | 19.841 |
| H | 16.381 | 29.894 | 19.476 |
| O | 12.982 | 31.74  | 23.971 |
| H | 13.642 | 32.434 | 23.982 |
| H | 12.747 | 31.618 | 24.891 |
| O | 13.476 | 32.892 | 28.671 |
| H | 14.137 | 33.184 | 28.043 |
| H | 13.288 | 31.989 | 28.419 |
| O | 19.378 | 30.867 | 7.466  |
| H | 19.331 | 29.949 | 7.2    |
| H | 20.286 | 31.119 | 7.301  |

|   |        |        |        |
|---|--------|--------|--------|
| O | 14.1   | 25.544 | 16.465 |
| H | 14.254 | 26.406 | 16.851 |
| H | 13.352 | 25.195 | 16.95  |
| O | 22.678 | 29.625 | 16.507 |
| H | 23.225 | 30.276 | 16.946 |
| H | 22.985 | 28.785 | 16.848 |
| O | 19.204 | 28.066 | 13.227 |
| H | 19.892 | 28.232 | 12.582 |
| H | 18.729 | 28.895 | 13.289 |
| O | 7.314  | 30.539 | 12.014 |
| H | 7.302  | 31.433 | 11.672 |
| H | 8.18   | 30.205 | 11.78  |
| O | 26.659 | 25.853 | 7.926  |
| H | 27.319 | 26.349 | 8.411  |
| H | 26.742 | 24.958 | 8.256  |
| O | 25.07  | 33.118 | 26.888 |
| H | 25.665 | 32.455 | 27.24  |
| H | 25.099 | 33.829 | 27.528 |
| O | 33.337 | 30.816 | 24.096 |
| H | 33.522 | 30.823 | 25.035 |
| H | 32.532 | 31.326 | 24.007 |
| O | 9.629  | 31.078 | 9.123  |
| H | 9.467  | 30.705 | 9.99   |
| H | 10.53  | 31.4   | 9.165  |
| O | 22.684 | 32.621 | 25.692 |
| H | 22.94  | 31.699 | 25.689 |
| H | 23.347 | 33.052 | 26.232 |
| O | 15.718 | 25.165 | 8.299  |
| H | 16.584 | 24.811 | 8.1    |
| H | 15.678 | 25.178 | 9.255  |
| O | 11.17  | 29.151 | 21.291 |
| H | 12.004 | 29.4   | 21.69  |
| H | 11.226 | 28.201 | 21.193 |
| O | 33.37  | 25.639 | 19.299 |
| H | 32.733 | 25.983 | 19.926 |
| H | 34.157 | 26.164 | 19.446 |
| O | 27.048 | 30.86  | 11.619 |
| H | 26.8   | 30.85  | 12.543 |
| H | 27.668 | 30.136 | 11.529 |
| O | 16.267 | 28.198 | 26.672 |
| H | 16.151 | 27.332 | 26.281 |
| H | 15.448 | 28.656 | 26.485 |
| O | 25.075 | 27.949 | 24.701 |
| H | 25.929 | 27.518 | 24.754 |
| H | 24.626 | 27.503 | 23.984 |
| O | 19.353 | 30.071 | 21.619 |
| H | 18.914 | 29.509 | 22.257 |

|   |        |        |        |
|---|--------|--------|--------|
| H | 20.133 | 30.387 | 22.075 |
| O | 10.628 | 21.988 | 23.73  |
| H | 11.119 | 22.808 | 23.678 |
| H | 10.072 | 21.992 | 22.95  |
| O | 27.111 | 28.882 | 20.581 |
| H | 26.437 | 28.446 | 20.06  |
| H | 27.194 | 29.751 | 20.189 |
| O | 24.864 | 28.34  | 27.769 |
| H | 24.911 | 28.056 | 26.856 |
| H | 24.993 | 27.538 | 28.276 |
| O | 20.749 | 31.69  | 23.145 |
| H | 20.137 | 31.867 | 23.859 |
| H | 20.467 | 32.272 | 22.439 |
| O | 28.908 | 33.661 | 16.238 |
| H | 29.255 | 34.035 | 17.047 |
| H | 29.561 | 33.882 | 15.573 |
| O | 26.818 | 26.169 | 11.249 |
| H | 27.134 | 26.174 | 12.152 |
| H | 25.937 | 26.54  | 11.3   |
| O | 9.952  | 29.522 | 11.572 |
| H | 10.733 | 28.969 | 11.58  |
| H | 10.217 | 30.318 | 12.033 |
| O | 26.258 | 25.458 | 17.288 |
| H | 27.206 | 25.532 | 17.392 |
| H | 26.119 | 25.466 | 16.341 |
| O | 27.754 | 31.248 | 14.701 |
| H | 28.2   | 30.494 | 15.088 |
| H | 28.211 | 32.008 | 15.062 |
| O | 14.62  | 29.462 | 12.835 |
| H | 14.506 | 29.02  | 13.676 |
| H | 15.562 | 29.427 | 12.671 |
| O | 11.198 | 28.961 | 25.719 |
| H | 10.812 | 28.193 | 26.141 |
| H | 10.637 | 29.124 | 24.961 |
| O | 17.29  | 27.644 | 20.529 |
| H | 17.728 | 27.128 | 21.207 |
| H | 16.63  | 27.052 | 20.168 |
| O | 9.673  | 27.338 | 8.737  |
| H | 9.208  | 28.142 | 8.968  |
| H | 9.243  | 27.033 | 7.938  |
| O | 17.386 | 22.204 | 3.892  |
| H | 16.485 | 21.885 | 3.843  |
| H | 17.73  | 21.825 | 4.701  |
| O | 19.786 | 28.492 | 6.317  |
| H | 20.009 | 28.509 | 5.387  |
| H | 19.082 | 27.846 | 6.383  |
| O | 7.534  | 26.079 | 5.877  |



|   |        |        |        |
|---|--------|--------|--------|
| H | 8.409  | 25.747 | 5.677  |
| H | 6.944  | 25.525 | 5.366  |
| O | 17.153 | 30.287 | 9.094  |
| H | 18.033 | 30.583 | 8.857  |
| H | 16.612 | 30.518 | 8.34   |
| O | 29.235 | 27.705 | 5.897  |
| H | 29.893 | 27.107 | 5.541  |
| H | 28.707 | 27.959 | 5.14   |
| O | 15.066 | 31.205 | 7.392  |
| H | 14.184 | 31.451 | 7.111  |
| H | 15.639 | 31.845 | 6.971  |
| O | 24.095 | 32.693 | 12.689 |
| H | 24.197 | 33.57  | 13.059 |
| H | 24.397 | 32.104 | 13.38  |
| O | 15.103 | 31.043 | 10.626 |
| H | 15.695 | 30.398 | 10.24  |
| H | 15.009 | 30.766 | 11.537 |
| O | 25.258 | 32.449 | 10.257 |
| H | 24.789 | 32.356 | 11.086 |
| H | 26.057 | 31.935 | 10.375 |
| O | 13.392 | 29.186 | 4.809  |
| H | 12.516 | 29.09  | 4.437  |
| H | 13.924 | 29.519 | 4.086  |
| O | 26.075 | 28.483 | 6.74   |
| H | 26.619 | 28.393 | 5.958  |
| H | 26.164 | 27.643 | 7.191  |
| O | 20.817 | 29.522 | 11.52  |
| H | 21.724 | 29.388 | 11.794 |
| H | 20.821 | 30.376 | 11.088 |
| O | 20.925 | 27.96  | 8.713  |
| H | 20.995 | 28.704 | 9.311  |
| H | 20.462 | 28.309 | 7.951  |
| O | 20.656 | 25.108 | 5.925  |
| H | 19.745 | 25.334 | 6.111  |
| H | 20.606 | 24.507 | 5.182  |
| O | 14.253 | 26.808 | 7.076  |
| H | 14.676 | 26.092 | 7.549  |
| H | 14.122 | 27.488 | 7.737  |
| O | 16.955 | 15.331 | 32.7   |
| H | 16.55  | 15.37  | 33.566 |
| H | 16.453 | 15.951 | 32.171 |
| O | 21.44  | 22.08  | 30.761 |
| H | 22.317 | 22.004 | 30.384 |
| H | 21.373 | 21.338 | 31.362 |
| O | 12.756 | 16.479 | 24.912 |
| H | 13.482 | 16.7   | 25.496 |
| H | 12.671 | 17.239 | 24.337 |

|   |        |        |        |
|---|--------|--------|--------|
| O | 16.042 | 14.118 | 27.054 |
| H | 15.404 | 14.757 | 26.737 |
| H | 16.134 | 14.312 | 27.986 |
| O | 22.676 | 17.042 | 33.605 |
| H | 23.063 | 16.219 | 33.905 |
| H | 21.794 | 17.042 | 33.976 |
| O | 4.385  | 14.355 | 22.132 |
| H | 4.404  | 14.303 | 21.176 |
| H | 5.022  | 15.036 | 22.348 |
| O | 26.962 | 21.825 | 33.666 |
| H | 26.371 | 21.81  | 32.913 |
| H | 27.319 | 20.938 | 33.708 |
| O | 16.029 | 25.333 | 26.761 |
| H | 16.951 | 25.579 | 26.679 |
| H | 15.939 | 25.037 | 27.667 |
| O | 11.873 | 17.622 | 29.258 |
| H | 11.424 | 17.928 | 28.469 |
| H | 12.778 | 17.482 | 28.979 |
| O | 12.847 | 15.651 | 36.472 |
| H | 11.986 | 15.24  | 36.541 |
| H | 12.659 | 16.579 | 36.328 |
| O | 23.729 | 23.294 | 23.224 |
| H | 24.058 | 24.189 | 23.134 |
| H | 24.062 | 22.838 | 22.451 |
| O | 19.392 | 20.508 | 33.059 |
| H | 19.681 | 19.86  | 32.416 |
| H | 20.188 | 20.746 | 33.533 |
| O | 33.331 | 12.525 | 26.742 |
| H | 33.384 | 13.096 | 27.509 |
| H | 32.414 | 12.57  | 26.472 |
| O | 14.938 | 14.961 | 34.797 |
| H | 14.775 | 14.024 | 34.687 |
| H | 14.259 | 15.252 | 35.406 |
| O | 10.502 | 21.215 | 32.977 |
| H | 10.478 | 21.586 | 33.858 |
| H | 11.075 | 21.803 | 32.484 |
| O | 13.661 | 22.759 | 38.431 |
| H | 13.072 | 22.497 | 39.139 |
| H | 14.536 | 22.704 | 38.815 |
| O | 21.786 | 24.636 | 30.15  |
| H | 22.028 | 23.795 | 30.538 |
| H | 22.583 | 24.936 | 29.713 |
| O | 19.4   | 13.241 | 34.309 |
| H | 19.748 | 12.462 | 33.876 |
| H | 18.695 | 12.911 | 34.866 |
| O | 15.76  | 9.473  | 30.393 |
| H | 14.834 | 9.234  | 30.432 |

|   |        |        |        |
|---|--------|--------|--------|
| H | 15.937 | 9.596  | 29.461 |
| O | 19.217 | 23.957 | 31.127 |
| H | 20.148 | 24.159 | 31.03  |
| H | 19.154 | 23.022 | 30.934 |
| O | 19.267 | 10.349 | 29.028 |
| H | 18.369 | 10.678 | 28.982 |
| H | 19.722 | 10.973 | 29.593 |
| O | 26.109 | 6.756  | 33.276 |
| H | 26.062 | 5.831  | 33.036 |
| H | 26.995 | 7.023  | 33.031 |
| O | -1.048 | 10.742 | 16.957 |
| H | -0.336 | 10.629 | 17.586 |
| H | -1.512 | 11.524 | 17.257 |
| O | 16.387 | 20.326 | 30.157 |
| H | 16.358 | 20.609 | 31.071 |
| H | 17.16  | 20.758 | 29.797 |
| O | 6.936  | 13.286 | 35.968 |
| H | 6.377  | 12.562 | 36.25  |
| H | 7.382  | 12.954 | 35.188 |
| O | 6.095  | 13.607 | 30.531 |
| H | 5.914  | 14.046 | 31.362 |
| H | 5.245  | 13.568 | 30.091 |
| O | 21.717 | 19.25  | 31.351 |
| H | 22.221 | 19.013 | 30.573 |
| H | 21.531 | 18.414 | 31.779 |
| O | 13.236 | 26.962 | 33.362 |
| H | 13.729 | 27.188 | 34.15  |
| H | 13.65  | 26.161 | 33.042 |
| O | 21.773 | 16.589 | 28.207 |
| H | 21.965 | 16.894 | 27.32  |
| H | 22.616 | 16.28  | 28.541 |
| O | 30.768 | 14.722 | 29.267 |
| H | 30.961 | 15.589 | 28.908 |
| H | 31.615 | 14.279 | 29.291 |
| O | 25.178 | 27.253 | 30.538 |
| H | 26.098 | 27.493 | 30.65  |
| H | 24.755 | 28.057 | 30.237 |
| O | 19.91  | 17.365 | 34.391 |
| H | 19.781 | 16.988 | 35.261 |
| H | 19.934 | 18.31  | 34.541 |
| O | 7.472  | 18.784 | 29.415 |
| H | 6.896  | 18.049 | 29.205 |
| H | 7.735  | 18.631 | 30.322 |
| O | 13.558 | 25.662 | 30.212 |
| H | 13.476 | 26.59  | 30.432 |
| H | 13.048 | 25.56  | 29.408 |
| O | 19.811 | 22.199 | 24.228 |

|   |        |        |        |
|---|--------|--------|--------|
| H | 20.647 | 22.43  | 24.631 |
| H | 19.187 | 22.198 | 24.953 |
| O | 17.502 | 30.752 | 31.905 |
| H | 18.429 | 30.694 | 31.675 |
| H | 17.477 | 30.573 | 32.845 |
| O | 27.923 | 8.658  | 28.649 |
| H | 28.431 | 9.442  | 28.441 |
| H | 28.362 | 7.955  | 28.171 |
| O | 22.458 | 17.144 | 25.325 |
| H | 22.54  | 16.622 | 24.528 |
| H | 23.125 | 17.825 | 25.235 |
| O | 12.872 | 12.642 | 31.282 |
| H | 13.08  | 12.215 | 32.114 |
| H | 12.789 | 13.569 | 31.504 |
| O | 28.235 | 15.187 | 27.246 |
| H | 28.641 | 15.958 | 27.641 |
| H | 28.357 | 15.307 | 26.304 |
| O | 21.999 | 28.447 | 22.887 |
| H | 21.135 | 28.619 | 23.261 |
| H | 22.272 | 29.286 | 22.517 |
| O | 11.937 | 14.865 | 28.668 |
| H | 11.386 | 14.863 | 27.885 |
| H | 11.646 | 15.632 | 29.162 |
| O | 20.122 | 14.863 | 32.256 |
| H | 19.815 | 15.711 | 32.578 |
| H | 20.11  | 14.296 | 33.026 |
| O | 12.206 | 23.256 | 31.77  |
| H | 13.122 | 23.494 | 31.626 |
| H | 11.757 | 23.541 | 30.974 |
| O | 22.3   | 19.161 | 36.735 |
| H | 22.223 | 18.218 | 36.591 |
| H | 22.063 | 19.283 | 37.655 |
| O | 10.115 | 20.572 | 28.846 |
| H | 9.487  | 20.234 | 29.485 |
| H | 10.295 | 19.828 | 28.271 |
| O | 7.324  | 21.93  | 35.025 |
| H | 8.244  | 22.189 | 35.089 |
| H | 7.107  | 22.044 | 34.1   |
| O | 10.232 | 22.241 | 35.53  |
| H | 10.897 | 22.868 | 35.243 |
| H | 10.598 | 21.85  | 36.323 |
| O | 21.743 | 21.82  | 27.681 |
| H | 22.61  | 21.852 | 27.276 |
| H | 21.234 | 21.243 | 27.112 |
| O | 22.652 | 31.751 | 28.815 |
| H | 23.488 | 32.183 | 28.643 |
| H | 22.008 | 32.459 | 28.798 |

|   |        |        |        |
|---|--------|--------|--------|
| O | 14.851 | 23.762 | 24.915 |
| H | 15.36  | 24.056 | 24.159 |
| H | 15.232 | 24.231 | 25.657 |
| O | 17.235 | 13.891 | 29.551 |
| H | 16.489 | 13.548 | 30.042 |
| H | 17.465 | 14.704 | 30     |
| O | 14.422 | 19.455 | 37.505 |
| H | 14.335 | 20.392 | 37.682 |
| H | 13.526 | 19.158 | 37.342 |
| O | 12.496 | 18.392 | 23.093 |
| H | 12.583 | 19.222 | 23.562 |
| H | 12.739 | 18.6   | 22.191 |
| O | 13.511 | 21.266 | 28.659 |
| H | 12.659 | 21.659 | 28.471 |
| H | 13.674 | 21.478 | 29.579 |
| O | 19.58  | 12.408 | 31.127 |
| H | 19.432 | 13.285 | 31.481 |
| H | 19.842 | 11.885 | 31.885 |
| O | 9.923  | 17.477 | 27.295 |
| H | 9.111  | 17.051 | 27.568 |
| H | 10.363 | 16.827 | 26.747 |
| O | 18.347 | 8.686  | 25.953 |
| H | 18.62  | 9.597  | 26.065 |
| H | 18.068 | 8.41   | 26.826 |
| O | 19.701 | 25.862 | 36.19  |
| H | 18.941 | 25.323 | 36.411 |
| H | 19.476 | 26.261 | 35.35  |
| O | 15.273 | 18.259 | 34.139 |
| H | 14.368 | 18.555 | 34.047 |
| H | 15.707 | 18.562 | 33.342 |
| O | 6.283  | 19.459 | 35.678 |
| H | 6.527  | 20.316 | 35.329 |
| H | 6.471  | 19.52  | 36.614 |
| O | 11.19  | 28.685 | 32.162 |
| H | 11.755 | 28.315 | 32.841 |
| H | 11.729 | 29.356 | 31.742 |
| O | 25.163 | 21.625 | 31.806 |
| H | 25.502 | 21.439 | 30.93  |
| H | 24.998 | 20.762 | 32.187 |
| O | 24.758 | 23.037 | 28.812 |
| H | 24.497 | 23.059 | 27.891 |
| H | 25.629 | 22.639 | 28.804 |
| O | 27.701 | 15.452 | 34.633 |
| H | 28.127 | 15.413 | 35.489 |
| H | 27.165 | 14.659 | 34.596 |
| O | 31.006 | 24.973 | 26.133 |
| H | 31.048 | 25.098 | 27.081 |

|   |        |        |        |
|---|--------|--------|--------|
| H | 31.194 | 24.044 | 26.005 |
| O | 21.843 | 14.029 | 29.919 |
| H | 21.364 | 13.201 | 29.9   |
| H | 21.47  | 14.505 | 30.661 |
| O | 24.263 | 12.291 | 32.764 |
| H | 23.45  | 11.919 | 33.108 |
| H | 24.274 | 12.031 | 31.843 |
| O | 19.647 | 17.003 | 37.222 |
| H | 20.468 | 17.239 | 37.655 |
| H | 18.977 | 17.127 | 37.895 |
| O | 3.691  | 13.415 | 24.653 |
| H | 3.879  | 13.535 | 23.722 |
| H | 4.249  | 12.684 | 24.918 |
| O | 10.883 | 14.903 | 26.04  |
| H | 10.417 | 14.692 | 25.231 |
| H | 11.719 | 15.265 | 25.746 |
| O | 23.802 | 14.613 | 33.875 |
| H | 23.213 | 14.323 | 34.571 |
| H | 24.165 | 13.803 | 33.517 |
| O | 27.401 | 26.591 | 25.41  |
| H | 27.41  | 26.62  | 26.367 |
| H | 28.087 | 27.203 | 25.145 |
| O | 21.655 | 11.816 | 28.049 |
| H | 22.116 | 11.342 | 28.742 |
| H | 22.219 | 11.724 | 27.281 |
| O | 26.18  | 4.442  | 29.754 |
| H | 25.457 | 4.83   | 29.262 |
| H | 26.812 | 5.154  | 29.853 |
| O | 9.156  | 25.736 | 30.419 |
| H | 9.733  | 25.049 | 30.755 |
| H | 9.06   | 26.347 | 31.149 |
| O | 13.533 | 12.733 | 28.119 |
| H | 14.455 | 12.946 | 27.977 |
| H | 13.182 | 13.489 | 28.589 |
| O | 17.614 | 10.009 | 32.893 |
| H | 17.33  | 10.878 | 33.18  |
| H | 17.164 | 9.874  | 32.059 |
| O | 23.859 | 8.287  | 33.791 |
| H | 24.67  | 7.888  | 33.476 |
| H | 23.841 | 8.086  | 34.727 |
| O | 23.935 | 13.857 | 27.143 |
| H | 23.268 | 14.002 | 27.814 |
| H | 24.462 | 14.655 | 27.153 |
| O | 18.692 | 26.056 | 26.329 |
| H | 19.128 | 26.796 | 26.752 |
| H | 19.378 | 25.394 | 26.239 |
| O | 11.851 | 12.855 | 23.124 |

|   |        |        |        |
|---|--------|--------|--------|
| H | 11.658 | 13.712 | 22.744 |
| H | 12.698 | 12.969 | 23.555 |
| O | 15.626 | 12.123 | 30.89  |
| H | 15.657 | 11.216 | 30.585 |
| H | 14.766 | 12.438 | 30.611 |
| O | 27.728 | 26.795 | 31.503 |
| H | 28.163 | 27.531 | 31.932 |
| H | 27.182 | 26.407 | 32.187 |
| O | 15.9   | 21.018 | 35.538 |
| H | 15.706 | 20.102 | 35.736 |
| H | 16.309 | 21.355 | 36.335 |
| O | 10.014 | 20.59  | 26.179 |
| H | 9.549  | 21.152 | 26.799 |
| H | 10.185 | 21.155 | 25.426 |
| O | 19.394 | 15.833 | 16.886 |
| H | 20.083 | 16.332 | 17.326 |
| H | 18.978 | 15.332 | 17.587 |
| O | 20.054 | 26.94  | 20.282 |
| H | 19.373 | 27.3   | 19.714 |
| H | 19.839 | 26.01  | 20.354 |
| O | 16.945 | 12.623 | 24.602 |
| H | 16.984 | 12.276 | 23.71  |
| H | 17.651 | 12.172 | 25.065 |
| O | 22.958 | 16.088 | 5.736  |
| H | 22.339 | 16.502 | 6.337  |
| H | 23.819 | 16.312 | 6.088  |
| O | 23.37  | 10.671 | 13.931 |
| H | 22.71  | 9.994  | 14.082 |
| H | 22.878 | 11.41  | 13.574 |
| O | 26.309 | 9.972  | 32.112 |
| H | 25.764 | 9.271  | 31.755 |
| H | 26.185 | 9.913  | 33.06  |
| O | 15.044 | 14.239 | 14.849 |
| H | 14.889 | 15.184 | 14.839 |
| H | 15.803 | 14.127 | 15.421 |
| O | 17.468 | 17.185 | 14.984 |
| H | 17.92  | 16.542 | 15.53  |
| H | 16.609 | 17.286 | 15.394 |
| O | 14.403 | 16.848 | 15.969 |
| H | 13.948 | 17.67  | 16.154 |
| H | 14.21  | 16.292 | 16.723 |
| O | 15.941 | 22.78  | 28.839 |
| H | 15.971 | 22.046 | 29.452 |
| H | 16.454 | 23.468 | 29.264 |
| O | 9.19   | 26.368 | 11.58  |
| H | 9.137  | 26.834 | 10.746 |
| H | 8.366  | 26.573 | 12.023 |

|   |        |        |        |
|---|--------|--------|--------|
| O | 25.461 | 27.257 | 19.145 |
| H | 24.532 | 27.278 | 19.375 |
| H | 25.525 | 26.581 | 18.47  |
| O | 25.425 | 11.559 | 27.11  |
| H | 24.902 | 12.36  | 27.139 |
| H | 25.715 | 11.43  | 28.013 |
| O | 18.419 | 5.694  | 17.961 |
| H | 17.904 | 5.222  | 17.306 |
| H | 19.284 | 5.287  | 17.924 |
| O | 25.06  | 21.993 | 21.145 |
| H | 25.996 | 22.109 | 20.98  |
| H | 24.83  | 21.197 | 20.666 |
| O | 29.628 | 17.598 | 10.714 |
| H | 29.801 | 18.391 | 11.222 |
| H | 30.054 | 16.899 | 11.21  |
| O | 17.57  | 13.249 | 16.234 |
| H | 18.437 | 13.654 | 16.246 |
| H | 17.195 | 13.459 | 17.089 |
| O | 15.28  | 15.817 | 12.454 |
| H | 14.861 | 15.48  | 11.662 |
| H | 15.297 | 15.07  | 13.052 |
| O | 21.627 | 12.663 | 13.231 |
| H | 21.25  | 12.924 | 14.071 |
| H | 21.47  | 13.412 | 12.655 |
| O | 17.755 | 15.73  | 25.649 |
| H | 18.607 | 15.4   | 25.932 |
| H | 17.126 | 15.092 | 25.988 |
| O | 30.373 | 25.709 | 28.908 |
| H | 30.294 | 24.934 | 29.464 |
| H | 29.553 | 26.184 | 29.04  |
| O | 18.731 | 22.555 | 17.426 |
| H | 17.984 | 22.738 | 16.856 |
| H | 18.404 | 22.718 | 18.31  |
| O | 16.305 | 13.653 | 9.176  |
| H | 15.683 | 13.996 | 9.818  |
| H | 15.787 | 13.539 | 8.379  |
| O | 14.368 | 13.467 | 21.096 |
| H | 14.669 | 14.215 | 21.613 |
| H | 14.139 | 13.841 | 20.245 |
| O | 22.909 | 23.677 | 16.692 |
| H | 22.302 | 24.379 | 16.929 |
| H | 22.394 | 22.875 | 16.78  |
| O | 22.343 | 26.264 | 13.759 |
| H | 21.624 | 26.451 | 13.154 |
| H | 22.138 | 26.778 | 14.54  |
| O | 28.285 | 4.477  | 19.359 |
| H | 29.064 | 4.957  | 19.64  |



|   |        |        |        |
|---|--------|--------|--------|
| H | 28.469 | 3.566  | 19.587 |
| O | 8.898  | 18.427 | 15.597 |
| H | 9.56   | 19.004 | 15.215 |
| H | 8.079  | 18.693 | 15.179 |
| O | 11.489 | 21.897 | 12.634 |
| H | 12.403 | 21.614 | 12.659 |
| H | 11.531 | 22.85  | 12.711 |
| O | 21.335 | 19.709 | 23.292 |
| H | 20.775 | 20.422 | 23.599 |
| H | 20.725 | 19.007 | 23.064 |
| O | 30     | 21.412 | 31.927 |
| H | 29.511 | 21.114 | 32.693 |
| H | 30.844 | 20.964 | 31.992 |
| O | 19.946 | 29.885 | 16.909 |
| H | 20.864 | 29.831 | 16.642 |
| H | 19.97  | 30.307 | 17.768 |
| O | 13.262 | 26.321 | 13.77  |
| H | 13.79  | 27.004 | 14.183 |
| H | 13.563 | 25.508 | 14.176 |
| O | 25.524 | 21.135 | 12.809 |
| H | 25.102 | 20.588 | 12.146 |
| H | 25.298 | 22.031 | 12.559 |
| O | 27.382 | 25.171 | 14.397 |
| H | 27.956 | 24.443 | 14.635 |
| H | 26.543 | 24.758 | 14.194 |
| O | 19.293 | 13.239 | 27.628 |
| H | 18.729 | 13.63  | 28.295 |
| H | 20.128 | 13.096 | 28.074 |
| O | 11.386 | 16.902 | 19.667 |
| H | 10.675 | 17.357 | 19.216 |
| H | 11.773 | 17.567 | 20.236 |
| O | 9.365  | 12.364 | 8.054  |
| H | 9.292  | 11.497 | 7.656  |
| H | 10.244 | 12.381 | 8.432  |
| O | 14.224 | 10.457 | 25.473 |
| H | 13.675 | 10.076 | 24.788 |
| H | 13.607 | 10.898 | 26.057 |
| O | 27.741 | 16.05  | 24.581 |
| H | 26.823 | 16.164 | 24.335 |
| H | 28.205 | 16.731 | 24.094 |
| O | 15.712 | 18.646 | 24.882 |
| H | 16.604 | 18.442 | 24.598 |
| H | 15.821 | 19.333 | 25.539 |
| O | 19.477 | 12.979 | 0.904  |
| H | 18.825 | 13.669 | 0.787  |
| H | 19.681 | 12.998 | 1.839  |
| O | 18.883 | 6.511  | 14.197 |

|   |        |        |        |
|---|--------|--------|--------|
| H | 19.033 | 5.952  | 14.959 |
| H | 19.752 | 6.635  | 13.816 |
| O | 24.681 | 20.073 | 14.961 |
| H | 23.846 | 20.534 | 15.05  |
| H | 25.116 | 20.506 | 14.227 |
| O | 18.261 | 22.005 | 26.323 |
| H | 17.341 | 22.148 | 26.101 |
| H | 18.241 | 21.652 | 27.212 |
| O | 15.03  | 16.584 | 26.547 |
| H | 15.496 | 17.223 | 26.006 |
| H | 14.873 | 17.039 | 27.374 |
| O | 19.257 | 18.968 | 27.196 |
| H | 19.113 | 18.833 | 26.259 |
| H | 19.164 | 18.097 | 27.581 |
| O | 13.242 | 15.061 | 18.782 |
| H | 12.414 | 14.723 | 18.441 |
| H | 13.003 | 15.872 | 19.231 |
| O | 2.269  | 13.672 | 11.287 |
| H | 2.89   | 12.998 | 11.562 |
| H | 1.484  | 13.186 | 11.034 |
| O | 18.487 | 11.278 | 13.645 |
| H | 18.181 | 11.915 | 13     |
| H | 18.748 | 11.807 | 14.399 |
| O | 16.854 | 8.504  | 19.286 |
| H | 17.512 | 8.476  | 19.98  |
| H | 16.016 | 8.472  | 19.748 |
| O | 14.272 | 18.25  | 13.393 |
| H | 14.767 | 17.467 | 13.154 |
| H | 13.532 | 18.261 | 12.786 |
| O | 21.4   | 11.534 | 24.354 |
| H | 22.108 | 10.945 | 24.616 |
| H | 21.833 | 12.373 | 24.195 |
| O | 14.464 | 18.51  | 28.583 |
| H | 13.694 | 19.017 | 28.328 |
| H | 14.964 | 19.1   | 29.147 |
| O | 13.277 | 19.405 | 15.875 |
| H | 13.618 | 19.224 | 14.999 |
| H | 13.859 | 20.078 | 16.225 |
| O | 15.771 | 14.127 | 18.118 |
| H | 16.154 | 14.342 | 18.969 |
| H | 14.88  | 14.475 | 18.163 |
| O | 14.25  | 22.462 | 13.34  |
| H | 14.147 | 22.425 | 12.389 |
| H | 15.019 | 23.016 | 13.476 |
| O | 16.827 | 11.302 | 10.527 |
| H | 17.434 | 11.501 | 11.239 |
| H | 16.743 | 12.126 | 10.047 |

|   |        |        |        |
|---|--------|--------|--------|
| O | 14.742 | 28.238 | 15.334 |
| H | 14.438 | 28.843 | 16.011 |
| H | 15.695 | 28.235 | 15.425 |
| O | 22.076 | 9.108  | 15.841 |
| H | 22.533 | 9.041  | 16.68  |
| H | 21.422 | 9.793  | 15.978 |
| O | 24.223 | 17.423 | 14.731 |
| H | 23.553 | 17.297 | 15.402 |
| H | 24.473 | 18.344 | 14.812 |
| O | 6.718  | 15.743 | 20.562 |
| H | 6.749  | 16.374 | 21.281 |
| H | 7.498  | 15.202 | 20.685 |
| O | 10.755 | 23.099 | 29.429 |
| H | 10.654 | 22.161 | 29.268 |
| H | 10.382 | 23.516 | 28.652 |
| O | 27.991 | 19.053 | 24.709 |
| H | 27.83  | 19.759 | 24.083 |
| H | 27.119 | 18.729 | 24.934 |
| O | 26.205 | 13.685 | 6.223  |
| H | 26.475 | 12.817 | 6.523  |
| H | 25.384 | 13.533 | 5.756  |
| O | 25.571 | 16.088 | 26.879 |
| H | 25.369 | 16.91  | 26.432 |
| H | 26.523 | 16.094 | 26.975 |
| O | 24.569 | 19.77  | 10.825 |
| H | 23.627 | 19.909 | 10.921 |
| H | 24.689 | 18.832 | 10.973 |
| O | 21.065 | 25.826 | 17.148 |
| H | 21.323 | 26.57  | 17.693 |
| H | 20.241 | 26.1   | 16.744 |
| O | 7.429  | 14.828 | 14.904 |
| H | 7.2    | 14.177 | 14.241 |
| H | 8.385  | 14.873 | 14.875 |
| O | 19.662 | 19.241 | 14.753 |
| H | 19.241 | 19.991 | 14.332 |
| H | 18.958 | 18.601 | 14.862 |
| O | 25.015 | 25.077 | 25.389 |
| H | 24.909 | 25.396 | 26.285 |
| H | 25.954 | 25.154 | 25.217 |
| O | 15.648 | 10.447 | 15.077 |
| H | 15.635 | 9.705  | 15.681 |
| H | 16.538 | 10.456 | 14.726 |
| O | 24.255 | 22.071 | 26.165 |
| H | 25.154 | 22.104 | 25.836 |
| H | 23.727 | 22.436 | 25.455 |
| O | 19.663 | 25.389 | 12.536 |
| H | 19.505 | 26.136 | 13.115 |

|   |        |        |        |
|---|--------|--------|--------|
| H | 19.449 | 25.714 | 11.662 |
| O | 22.74  | 15.438 | 22.947 |
| H | 23.517 | 15.344 | 22.397 |
| H | 22.671 | 14.602 | 23.409 |
| O | 14.287 | 21.072 | 10.769 |
| H | 15.146 | 20.653 | 10.73  |
| H | 14.247 | 21.611 | 9.979  |
| O | 9.796  | 9.679  | 25.912 |
| H | 9.944  | 10.403 | 26.52  |
| H | 8.844  | 9.632  | 25.823 |
| O | 22.303 | 16.254 | 11.052 |
| H | 23.249 | 16.2   | 11.189 |
| H | 21.924 | 15.914 | 11.862 |
| O | 16.339 | 23.922 | 16.134 |
| H | 16.628 | 24.337 | 15.322 |
| H | 15.499 | 24.337 | 16.33  |
| O | 21.65  | 19.95  | 11.103 |
| H | 21.479 | 19.292 | 11.777 |
| H | 21.353 | 20.773 | 11.491 |
| O | 16.783 | 20.269 | 14.756 |
| H | 16.29  | 20.474 | 15.55  |
| H | 16.349 | 19.496 | 14.397 |
| O | 20.451 | 13.255 | 15.701 |
| H | 20.65  | 13.928 | 16.352 |
| H | 20.389 | 12.444 | 16.206 |
| O | 24.977 | 13.027 | 11.868 |
| H | 25.252 | 12.3   | 12.426 |
| H | 24.624 | 13.676 | 12.477 |
| O | 25.802 | 21.018 | 5.058  |
| H | 26.396 | 20.3   | 4.84   |
| H | 25.694 | 21.497 | 4.237  |
| O | 18.644 | 13.758 | 12.463 |
| H | 18.538 | 14.559 | 12.976 |
| H | 18.746 | 14.063 | 11.561 |
| O | 16.501 | 15.419 | 20.562 |
| H | 16.026 | 15.502 | 21.388 |
| H | 16.832 | 16.3   | 20.386 |
| O | 27.658 | 10.103 | 21.625 |
| H | 28.235 | 10.275 | 20.881 |
| H | 27.592 | 10.945 | 22.077 |
| O | 25.356 | 22.448 | 17.363 |
| H | 25.957 | 23.193 | 17.351 |
| H | 24.51  | 22.82  | 17.113 |
| O | 24.968 | 14.88  | 21.457 |
| H | 25.063 | 13.947 | 21.268 |
| H | 24.656 | 15.261 | 20.636 |
| O | 16.794 | 19.565 | 10.797 |

|   |        |        |        |
|---|--------|--------|--------|
| H | 16.91  | 18.774 | 11.323 |
| H | 17.268 | 20.244 | 11.278 |
| O | 9.428  | 18.475 | 18.235 |
| H | 8.496  | 18.538 | 18.445 |
| H | 9.453  | 18.386 | 17.282 |
| O | 30.636 | 22.114 | 13.548 |
| H | 31.534 | 22.436 | 13.618 |
| H | 30.729 | 21.169 | 13.423 |
| O | 21.547 | 23.357 | 21.133 |
| H | 22.255 | 23.657 | 20.563 |
| H | 21.957 | 23.253 | 21.991 |
| O | 12.513 | 25.53  | 9.66   |
| H | 12.422 | 24.893 | 8.952  |
| H | 11.833 | 26.181 | 9.486  |
| O | 15.709 | 27.732 | 22.834 |
| H | 16.206 | 28.194 | 22.158 |
| H | 16.316 | 27.07  | 23.166 |
| O | 17.379 | 29.438 | 15.92  |
| H | 18.303 | 29.489 | 16.168 |
| H | 17.258 | 30.157 | 15.3   |
| O | 16.011 | 17.212 | 31.043 |
| H | 15.317 | 17.042 | 30.406 |
| H | 16.788 | 17.379 | 30.51  |
| O | 23.746 | 29.453 | 30.506 |
| H | 23.08  | 29.84  | 29.937 |
| H | 23.805 | 30.055 | 31.248 |
| O | 24.396 | 23.347 | 12.071 |
| H | 24.119 | 24.109 | 11.562 |
| H | 23.629 | 23.12  | 12.597 |
| O | 9.908  | 17.41  | 23.452 |
| H | 10.793 | 17.759 | 23.344 |
| H | 9.347  | 18.185 | 23.484 |
| O | 14.078 | 22.542 | 8.549  |
| H | 14.538 | 23.355 | 8.338  |
| H | 13.169 | 22.71  | 8.303  |
| O | 15.072 | 21.246 | 16.941 |
| H | 15.033 | 21.149 | 17.893 |
| H | 15.506 | 22.088 | 16.804 |
| O | 17.755 | 17.448 | 12.332 |
| H | 18.247 | 17.413 | 13.152 |
| H | 16.93  | 17.005 | 12.528 |
| O | 16.921 | 23.022 | 22.968 |
| H | 16.499 | 23.164 | 22.121 |
| H | 17.771 | 22.638 | 22.751 |
| O | 8.472  | 19.84  | 23.852 |
| H | 8.277  | 20.697 | 23.474 |
| H | 8.95   | 20.037 | 24.658 |

|   |        |        |        |
|---|--------|--------|--------|
| O | 17.786 | 21.334 | 12.658 |
| H | 17.278 | 22.145 | 12.626 |
| H | 17.52  | 20.917 | 13.477 |
| O | 11.65  | 21.466 | 19.131 |
| H | 12.012 | 20.691 | 18.703 |
| H | 11.042 | 21.833 | 18.489 |
| O | 19.878 | 12.178 | 8.33   |
| H | 20.645 | 12.75  | 8.341  |
| H | 19.732 | 11.955 | 9.249  |
| O | 25.465 | 16.898 | 23.713 |
| H | 25.257 | 16.216 | 23.076 |
| H | 24.796 | 17.568 | 23.574 |
| O | 25.204 | 18.77  | 26.226 |
| H | 24.96  | 19.407 | 25.555 |
| H | 24.691 | 19.022 | 26.994 |
| O | 12.147 | 6.908  | 26.549 |
| H | 12.898 | 6.828  | 25.962 |
| H | 11.651 | 7.651  | 26.203 |
| O | 11.774 | 9.792  | 11.863 |
| H | 12.611 | 10.227 | 12.022 |
| H | 11.921 | 9.271  | 11.074 |
| O | 17.469 | 25.759 | 23.544 |
| H | 17.553 | 24.829 | 23.332 |
| H | 18.056 | 25.889 | 24.288 |
| O | 14.927 | 15.308 | 22.925 |
| H | 14.754 | 14.585 | 23.528 |
| H | 14.552 | 16.075 | 23.358 |
| O | 27.736 | 17.219 | 19.315 |
| H | 27.382 | 17.243 | 18.426 |
| H | 27.865 | 16.288 | 19.496 |
| O | 16.768 | 12.765 | 5.92   |
| H | 17.458 | 12.865 | 6.575  |
| H | 16.063 | 12.31  | 6.381  |
| O | 16.482 | 30.519 | 22.119 |
| H | 17.414 | 30.43  | 21.92  |
| H | 16.46  | 30.887 | 23.003 |
| O | 14.371 | 13.497 | 24.665 |
| H | 13.969 | 12.678 | 24.955 |
| H | 15.312 | 13.331 | 24.71  |
| O | 19.094 | 11.327 | 25.729 |
| H | 19.08  | 11.87  | 26.518 |
| H | 19.942 | 11.511 | 25.326 |
| O | 20.33  | 2.519  | 14.449 |
| H | 20.702 | 2.649  | 13.576 |
| H | 21.004 | 2.843  | 15.046 |
| O | 10.493 | 14.62  | 6.71   |
| H | 11.024 | 14.708 | 7.502  |

|   |        |        |        |
|---|--------|--------|--------|
| H | 10.017 | 13.799 | 6.831  |
| O | 18.687 | 29.294 | 24.049 |
| H | 19.196 | 29.293 | 24.859 |
| H | 17.776 | 29.344 | 24.338 |
| O | 18.153 | 10.667 | 4.36   |
| H | 17.706 | 11.199 | 5.019  |
| H | 17.461 | 10.125 | 3.98   |
| O | 20.257 | 22.752 | 12.421 |
| H | 19.441 | 22.302 | 12.202 |
| H | 19.999 | 23.665 | 12.552 |
| O | 16.52  | 23.984 | 12.622 |
| H | 16.125 | 24.529 | 11.941 |
| H | 17.05  | 24.593 | 13.138 |
| O | 9.36   | 26.219 | 24.548 |
| H | 9.741  | 25.846 | 25.343 |
| H | 8.518  | 25.773 | 24.454 |
| O | 21.31  | 21.552 | 17.118 |
| H | 20.371 | 21.738 | 17.095 |
| H | 21.367 | 20.637 | 17.392 |
| O | 20.977 | 33.377 | 16.088 |
| H | 21.084 | 32.541 | 15.635 |
| H | 20.243 | 33.234 | 16.685 |
| O | 26.912 | 22.294 | 24.819 |
| H | 27.582 | 22.928 | 25.074 |
| H | 27.283 | 21.845 | 24.059 |
| O | 26.128 | 20.794 | 8.596  |
| H | 25.623 | 21.575 | 8.823  |
| H | 25.934 | 20.171 | 9.297  |
| O | 28.098 | 12.063 | 12.714 |
| H | 28.49  | 12.491 | 11.953 |
| H | 27.572 | 11.353 | 12.345 |
| O | 20.386 | 16.855 | 22.874 |
| H | 19.688 | 16.2   | 22.901 |
| H | 21.169 | 16.361 | 22.63  |
| O | 20.219 | 17.398 | 9.613  |
| H | 21.062 | 17.358 | 10.063 |
| H | 19.753 | 16.615 | 9.906  |
| O | 19.534 | 4.322  | 6.59   |
| H | 18.7   | 4.002  | 6.246  |
| H | 20.057 | 4.512  | 5.812  |
| O | 34.979 | 25.986 | 24.872 |
| H | 35.883 | 26.274 | 24.747 |
| H | 34.756 | 25.538 | 24.056 |
| O | 31.126 | 3.539  | 26.175 |
| H | 31.164 | 2.6    | 25.996 |
| H | 31.295 | 3.952  | 25.328 |
| O | 16.815 | 12.151 | 21.77  |

|   |        |        |        |
|---|--------|--------|--------|
| H | 15.968 | 12.574 | 21.625 |
| H | 17.118 | 11.915 | 20.894 |
| O | 23.346 | 13.405 | 24.485 |
| H | 23.579 | 13.548 | 25.403 |
| H | 24.171 | 13.162 | 24.065 |
| O | 13.765 | 10.058 | 8.48   |
| H | 13.369 | 9.811  | 7.644  |
| H | 13.745 | 9.255  | 9.001  |
| O | 14.298 | 10.813 | 12.508 |
| H | 14.985 | 10.8   | 11.841 |
| H | 14.71  | 10.432 | 13.283 |
| O | 9.276  | 9.6    | 12.286 |
| H | 9.228  | 10.347 | 12.883 |
| H | 10.196 | 9.561  | 12.025 |
| O | 27.973 | 19.014 | 7.91   |
| H | 27.322 | 19.715 | 7.966  |
| H | 27.618 | 18.314 | 8.458  |
| O | 8.414  | 13.815 | 22.047 |
| H | 8.693  | 12.915 | 21.88  |
| H | 9.23   | 14.309 | 22.122 |
| O | 27.268 | 12.771 | 15.442 |
| H | 26.34  | 12.54  | 15.396 |
| H | 27.646 | 12.406 | 14.643 |
| O | 20.594 | 10.31  | 22.154 |
| H | 21.357 | 9.739  | 22.06  |
| H | 20.755 | 10.793 | 22.965 |
| O | 29.545 | 13.664 | 8.748  |
| H | 28.742 | 13.678 | 9.268  |
| H | 30.139 | 13.095 | 9.239  |
| O | 23.224 | 6.175  | 17.644 |
| H | 23.777 | 6.187  | 16.863 |
| H | 22.995 | 7.093  | 17.788 |
| O | 19.409 | 24.33  | 19.467 |
| H | 20.177 | 23.984 | 19.922 |
| H | 19.523 | 24.05  | 18.559 |
| O | 7.605  | 10.179 | 21.005 |
| H | 8.263  | 10.849 | 21.186 |
| H | 7.961  | 9.687  | 20.265 |
| O | 15.15  | 23.322 | 20.352 |
| H | 15.685 | 22.545 | 20.191 |
| H | 14.359 | 22.986 | 20.773 |
| O | 22.52  | 22.091 | 13.856 |
| H | 21.633 | 22.215 | 13.52  |
| H | 22.443 | 22.242 | 14.798 |
| O | 18.279 | 15.065 | 22.961 |
| H | 17.794 | 15.164 | 23.781 |
| H | 17.829 | 14.357 | 22.501 |



|   |        |        |        |
|---|--------|--------|--------|
| O | 15.927 | 8.033  | 16.597 |
| H | 15.802 | 7.089  | 16.502 |
| H | 16.391 | 8.13   | 17.429 |
| O | 28.018 | 22.874 | 19.665 |
| H | 27.946 | 21.926 | 19.553 |
| H | 28.904 | 23.008 | 20.002 |
| O | 10.155 | 4.267  | 25.904 |
| H | 10.906 | 3.676  | 25.857 |
| H | 10.522 | 5.097  | 26.21  |
| O | 17.628 | 25.957 | 14.337 |
| H | 17.759 | 26.13  | 15.27  |
| H | 18.137 | 26.635 | 13.894 |
| O | 18.063 | 3.425  | 16.417 |
| H | 18.713 | 3.289  | 15.728 |
| H | 17.221 | 3.282  | 15.984 |
| O | 18.629 | 18.047 | 24.495 |
| H | 19.425 | 17.798 | 24.027 |
| H | 18.252 | 17.217 | 24.786 |
| O | 23.616 | 28.7   | 12.625 |
| H | 23.669 | 27.819 | 12.996 |
| H | 24.246 | 29.212 | 13.133 |
| O | 19.091 | 21.702 | 21.61  |
| H | 19.893 | 21.913 | 21.132 |
| H | 19.386 | 21.511 | 22.501 |
| O | 25.261 | 30.427 | 14.657 |
| H | 26.169 | 30.713 | 14.566 |
| H | 25.015 | 30.69  | 15.544 |
| O | 23.917 | 24.227 | 20.046 |
| H | 24.379 | 23.451 | 20.363 |
| H | 24.368 | 24.46  | 19.235 |
| O | 21.055 | 15.483 | 13.922 |
| H | 20.52  | 14.923 | 14.484 |
| H | 21.497 | 16.077 | 14.529 |
| O | 24.222 | 10.565 | 18.262 |
| H | 24.868 | 9.939  | 18.589 |
| H | 24.551 | 10.82  | 17.4   |
| O | 25.046 | 11.998 | 21.977 |
| H | 25.844 | 12.043 | 22.503 |
| H | 24.907 | 11.062 | 21.832 |
| O | 10.185 | 19.902 | 11.363 |
| H | 10.681 | 20.668 | 11.651 |
| H | 9.446  | 19.854 | 11.969 |
| O | 16.788 | 7.395  | 9.922  |
| H | 17.393 | 8.119  | 9.764  |
| H | 16.281 | 7.668  | 10.686 |
| O | 20.387 | 10.75  | 11.029 |
| H | 20.686 | 11.237 | 11.797 |

|   |        |        |        |
|---|--------|--------|--------|
| H | 21.093 | 10.129 | 10.849 |
| O | 18.426 | 9.698  | 9.126  |
| H | 19.206 | 9.307  | 9.522  |
| H | 18.13  | 10.342 | 9.769  |
| O | 18.182 | 24.209 | 8.114  |
| H | 18.945 | 24.632 | 8.509  |
| H | 18.506 | 23.359 | 7.818  |
| O | 10.896 | 3.652  | 15.323 |
| H | 11.465 | 3.964  | 14.619 |
| H | 10.424 | 2.913  | 14.94  |
| O | 21.753 | 14.324 | 8.707  |
| H | 21.991 | 14.935 | 9.404  |
| H | 22.481 | 14.373 | 8.087  |
| O | 18.526 | 27.218 | 32.835 |
| H | 18.441 | 27.806 | 32.083 |
| H | 19.47  | 27.121 | 32.958 |
| O | 27.302 | 31.335 | 19.424 |
| H | 27.752 | 31.879 | 20.07  |
| H | 27.117 | 31.93  | 18.697 |
| O | 14.811 | 3.941  | 29.399 |
| H | 14.368 | 4.782  | 29.291 |
| H | 14.12  | 3.34   | 29.678 |
| O | 13.859 | 28.506 | 8.94   |
| H | 13.25  | 28.633 | 9.667  |
| H | 14.025 | 29.389 | 8.609  |
| O | 22.599 | 19.857 | 8.309  |
| H | 22.736 | 20.754 | 8.005  |
| H | 22.329 | 19.952 | 9.222  |
| O | 14.199 | 6.789  | 25.103 |
| H | 14.274 | 7.493  | 24.458 |
| H | 15.096 | 6.639  | 25.399 |
| O | 26.291 | 30.243 | 23.073 |
| H | 26.462 | 29.894 | 22.198 |
| H | 25.381 | 30.539 | 23.04  |
| O | 11.838 | 22.324 | 4.493  |
| H | 12.076 | 21.49  | 4.897  |
| H | 10.908 | 22.431 | 4.695  |
| O | 15.954 | 25.44  | 1.975  |
| H | 15.091 | 25.292 | 1.588  |
| H | 15.873 | 25.114 | 2.872  |
| O | 4.25   | 16.719 | 6.239  |
| H | 4.066  | 17.381 | 6.905  |
| H | 4.121  | 17.174 | 5.407  |
| O | 14.367 | 16.235 | 2.9    |
| H | 13.944 | 15.378 | 2.948  |
| H | 14.18  | 16.545 | 2.014  |
| O | 9.459  | 16.99  | 9.082  |

|   |        |        |        |
|---|--------|--------|--------|
| H | 8.605  | 16.558 | 9.061  |
| H | 9.255  | 17.925 | 9.078  |
| O | 20.014 | 14.534 | 5.595  |
| H | 19.448 | 15.158 | 6.05   |
| H | 20.885 | 14.929 | 5.634  |
| O | 11.132 | 19.828 | 2.316  |
| H | 11.049 | 20.758 | 2.101  |
| H | 11.517 | 19.818 | 3.192  |
| O | 19.101 | 14.65  | 9.853  |
| H | 18.31  | 14.349 | 9.407  |
| H | 19.813 | 14.432 | 9.253  |
| O | 32.393 | 23.645 | 4.989  |
| H | 32.414 | 24.601 | 4.934  |
| H | 31.869 | 23.461 | 5.769  |
| O | 22.192 | 15.356 | 1.592  |
| H | 22.294 | 16.139 | 2.134  |
| H | 22.255 | 14.628 | 2.21   |
| O | 23.137 | 21.46  | 5.15   |
| H | 23.075 | 22.353 | 4.812  |
| H | 24.076 | 21.311 | 5.264  |
| O | 19.734 | 25.768 | 9.831  |
| H | 20.332 | 25.069 | 9.568  |
| H | 20.129 | 26.567 | 9.481  |
| O | 15.175 | 18.744 | 8.697  |
| H | 15.753 | 18.867 | 9.45   |
| H | 15.604 | 18.066 | 8.174  |
| O | 20.98  | 18.384 | 6.461  |
| H | 20.751 | 19.234 | 6.083  |
| H | 21.596 | 18.593 | 7.162  |
| O | 24.633 | 24.894 | 15.023 |
| H | 24.047 | 24.343 | 15.542 |
| H | 24.047 | 25.426 | 14.484 |
| O | 27.14  | 14.032 | 10.141 |
| H | 26.858 | 14.497 | 10.93  |
| H | 26.466 | 13.368 | 10.001 |
| O | 15.898 | 27.886 | 4.988  |
| H | 15.289 | 27.625 | 5.679  |
| H | 15.353 | 28.343 | 4.348  |
| O | 26.89  | 17.52  | 9.823  |
| H | 26.255 | 17.894 | 10.434 |
| H | 27.67  | 17.362 | 10.355 |
| O | 19.228 | 16.616 | 7.143  |
| H | 20.039 | 16.978 | 6.788  |
| H | 19.092 | 17.09  | 7.963  |
| O | 27.373 | 16.141 | 6.634  |
| H | 27.004 | 15.284 | 6.848  |
| H | 27.278 | 16.65  | 7.439  |

|   |        |        |        |
|---|--------|--------|--------|
| O | 20.518 | 9.114  | 6.35   |
| H | 19.891 | 9.73   | 5.971  |
| H | 20.06  | 8.737  | 7.101  |
| O | 15.505 | 12.638 | 2.711  |
| H | 16.376 | 13.015 | 2.835  |
| H | 14.904 | 13.37  | 2.85   |
| O | 12.036 | 12.55  | 8.6    |
| H | 12.391 | 11.692 | 8.369  |
| H | 12.764 | 13.156 | 8.461  |
| O | 8.073  | 19.293 | 12.916 |
| H | 7.339  | 19.82  | 13.231 |
| H | 7.831  | 18.392 | 13.131 |
| O | 16.265 | 9.075  | 3.397  |
| H | 16.279 | 9.024  | 2.442  |
| H | 15.386 | 9.391  | 3.608  |
| O | 24.605 | 17.758 | 2.681  |
| H | 25.247 | 17.187 | 2.258  |
| H | 25.124 | 18.306 | 3.27   |
| O | 24.885 | 14.894 | 3.349  |
| H | 24.562 | 15.111 | 4.223  |
| H | 24.685 | 13.964 | 3.243  |
| O | 28.786 | 10.546 | 7.084  |
| H | 29.066 | 11.286 | 6.545  |
| H | 27.829 | 10.58  | 7.058  |
| O | 9.669  | 18.818 | 4.806  |
| H | 8.851  | 18.481 | 5.172  |
| H | 9.542  | 18.775 | 3.858  |
| O | 16.97  | 17.032 | 3.23   |
| H | 16.035 | 16.906 | 3.072  |
| H | 17.264 | 16.202 | 3.606  |
| O | 11.314 | 15.665 | 4.297  |
| H | 11.711 | 14.872 | 3.937  |
| H | 11.11  | 15.44  | 5.204  |
| O | 17.516 | 20.477 | 6.169  |
| H | 16.589 | 20.714 | 6.18   |
| H | 17.614 | 19.86  | 6.895  |
| O | 20.423 | 20.967 | 4.975  |
| H | 21.356 | 20.762 | 4.921  |
| H | 20.068 | 20.697 | 4.128  |
| O | 27.555 | 19.317 | 1.402  |
| H | 28.43  | 19.293 | 1.016  |
| H | 26.976 | 19.014 | 0.703  |
| O | 18.504 | 19.38  | 8.678  |
| H | 17.977 | 19.426 | 9.475  |
| H | 19.214 | 18.775 | 8.895  |
| O | 24.323 | 25.463 | 9.965  |
| H | 24.664 | 25.721 | 9.109  |

|   |        |        |        |
|---|--------|--------|--------|
| H | 23.615 | 26.083 | 10.138 |
| O | 5.569  | 7.706  | 8.706  |
| H | 5.374  | 8.041  | 9.581  |
| H | 4.859  | 8.041  | 8.157  |
| O | 12.6   | 26.096 | 4.513  |
| H | 12.404 | 26.557 | 3.697  |
| H | 13.042 | 26.748 | 5.056  |
| O | 7.78   | 29.723 | 15.323 |
| H | 8.247  | 30.226 | 15.99  |
| H | 8.283  | 28.913 | 15.237 |
| O | 28.416 | 15.156 | 4.449  |
| H | 27.651 | 15.38  | 3.918  |
| H | 28.286 | 15.634 | 5.269  |
| O | 8.864  | 19.929 | 8.576  |
| H | 8.631  | 19.973 | 9.504  |
| H | 9.638  | 20.488 | 8.497  |
| O | 24.171 | 22.829 | 8.747  |
| H | 23.279 | 23.17  | 8.821  |
| H | 24.714 | 23.479 | 9.192  |
| O | 21.244 | 23.78  | 8.287  |
| H | 21.294 | 24.432 | 7.588  |
| H | 20.811 | 23.028 | 7.883  |
| O | 4.91   | 24.684 | 9.583  |
| H | 5.146  | 23.81  | 9.273  |
| H | 5.707  | 25.201 | 9.471  |
| O | 14.608 | 18.205 | 4.848  |
| H | 14.401 | 17.63  | 4.112  |
| H | 13.755 | 18.488 | 5.179  |
| O | 16.922 | 20.728 | 1.586  |
| H | 17.257 | 21.163 | 2.37   |
| H | 17.045 | 19.795 | 1.76   |
| O | 19.924 | 21.603 | 7.612  |
| H | 20.045 | 21.457 | 6.674  |
| H | 19.489 | 20.809 | 7.924  |
| O | 25.516 | 25.351 | 5.345  |
| H | 25.977 | 25.101 | 4.544  |
| H | 26.146 | 25.184 | 6.046  |
| O | 13.926 | 10.576 | 3.752  |
| H | 13.957 | 11.122 | 4.538  |
| H | 14.508 | 11.016 | 3.132  |
| O | 14.314 | 14.558 | 7.198  |
| H | 15.157 | 14.999 | 7.097  |
| H | 13.665 | 15.252 | 7.083  |
| O | 26.964 | 21.989 | 2.224  |
| H | 26.128 | 21.683 | 1.873  |
| H | 27.605 | 21.355 | 1.903  |
| O | 7.662  | 29.141 | 8.474  |

|   |        |        |        |
|---|--------|--------|--------|
| H | 8.366  | 29.783 | 8.57   |
| H | 7.261  | 29.35  | 7.631  |
| O | 12.808 | 13.996 | 2.996  |
| H | 12.559 | 13.173 | 3.416  |
| H | 12.63  | 13.853 | 2.066  |
| O | 17.02  | 28.357 | 11.062 |
| H | 17.879 | 28.356 | 11.485 |
| H | 17.155 | 28.842 | 10.248 |
| O | 27.783 | 23.898 | 3.877  |
| H | 27.781 | 23.239 | 4.572  |
| H | 27.737 | 23.391 | 3.066  |
| O | 21.839 | 17.798 | 2.752  |
| H | 21.384 | 18.234 | 3.473  |
| H | 22.768 | 17.887 | 2.965  |
| O | 14.979 | 20.976 | 3.838  |
| H | 14.632 | 20.89  | 4.726  |
| H | 14.97  | 20.085 | 3.49   |
| O | 12.076 | 19.619 | 5.305  |
| H | 11.173 | 19.305 | 5.315  |
| H | 12.279 | 19.797 | 6.223  |
| O | 24.135 | 9.013  | 7.504  |
| H | 24.017 | 8.16   | 7.084  |
| H | 24.243 | 8.81   | 8.433  |
| O | 20.533 | 7.791  | 9.143  |
| H | 21.058 | 7.108  | 8.727  |
| H | 20.768 | 7.744  | 10.07  |
| O | 14.962 | 26.232 | 10.749 |
| H | 15.29  | 27.119 | 10.896 |
| H | 14.02  | 26.344 | 10.621 |
| O | 10.375 | 22.399 | 2.011  |
| H | 10.783 | 23.103 | 2.516  |
| H | 9.516  | 22.745 | 1.77   |
| O | 15.887 | 7.892  | 6.108  |
| H | 15.984 | 8.007  | 5.163  |
| H | 16.101 | 8.749  | 6.477  |
| O | 23.608 | 12.845 | 5.112  |
| H | 23.199 | 12.399 | 5.853  |
| H | 23.459 | 12.261 | 4.369  |
| O | 7.049  | 10.427 | 7.263  |
| H | 6.836  | 10.4   | 8.196  |
| H | 6.96   | 11.349 | 7.024  |
| O | 12.377 | 19.602 | 8.232  |
| H | 13.164 | 19.429 | 8.749  |
| H | 12.059 | 20.445 | 8.555  |
| O | 20.666 | 8.4    | 2.17   |
| H | 21.02  | 7.917  | 2.916  |
| H | 19.837 | 7.965  | 1.973  |

|   |        |        |        |
|---|--------|--------|--------|
| O | 19.306 | 24.37  | 3.569  |
| H | 18.683 | 23.659 | 3.72   |
| H | 18.772 | 25.089 | 3.232  |
| O | 18.977 | 18.775 | 3.888  |
| H | 18.348 | 18.072 | 3.726  |
| H | 18.599 | 19.27  | 4.615  |
| O | 17.939 | 34.276 | 15.65  |
| H | 17.281 | 34.971 | 15.635 |
| H | 17.714 | 33.75  | 16.417 |
| O | 10.542 | 6.292  | 10.637 |
| H | 10.45  | 7.101  | 11.141 |
| H | 10.962 | 6.565  | 9.821  |
| O | 22.679 | 10.904 | 3.11   |
| H | 22.851 | 10.328 | 2.366  |
| H | 21.725 | 10.952 | 3.162  |
| O | 22.356 | 3.188  | 30.242 |
| H | 21.546 | 2.997  | 30.715 |
| H | 22.3   | 4.122  | 30.038 |
| O | 17.295 | 6.958  | 33.569 |
| H | 16.741 | 6.811  | 34.335 |
| H | 17.349 | 7.911  | 33.491 |
| O | 10.252 | 17.002 | 38.298 |
| H | 10.442 | 17.93  | 38.432 |
| H | 10.716 | 16.557 | 39.007 |
| O | 25.472 | 8.397  | 29.959 |
| H | 25.162 | 7.627  | 29.481 |
| H | 26.374 | 8.516  | 29.662 |
| O | 7.808  | 11.387 | 34.178 |
| H | 7.049  | 10.948 | 33.795 |
| H | 8.453  | 11.411 | 33.471 |
| O | 22.329 | 12.149 | 35.902 |
| H | 21.594 | 11.538 | 35.958 |
| H | 21.926 | 13.015 | 35.975 |
| O | 27.167 | 3.146  | 27.004 |
| H | 27.574 | 3.303  | 27.857 |
| H | 26.3   | 2.799  | 27.213 |
| O | 19.115 | 5.035  | 32.117 |
| H | 18.358 | 5.487  | 32.491 |
| H | 19.248 | 5.455  | 31.267 |
| O | 22.287 | 10.099 | 32.457 |
| H | 21.46  | 10.028 | 32.934 |
| H | 22.923 | 9.649  | 33.012 |
| O | 13.686 | 5.186  | 32.68  |
| H | 14.292 | 5.168  | 31.939 |
| H | 13.535 | 6.117  | 32.844 |
| O | 23.166 | 10.212 | 29.633 |
| H | 23.016 | 10.028 | 30.561 |

|   |        |        |        |
|---|--------|--------|--------|
| H | 23.982 | 9.755  | 29.427 |
| O | 6.994  | 6.164  | 26.969 |
| H | 6.4    | 6.639  | 26.388 |
| H | 7.276  | 6.818  | 27.609 |
| O | 21.656 | 8.536  | 27.858 |
| H | 20.705 | 8.617  | 27.786 |
| H | 21.897 | 9.152  | 28.549 |
| O | 12.456 | 7.652  | 32.959 |
| H | 11.592 | 7.284  | 32.775 |
| H | 12.467 | 7.774  | 33.909 |
| O | 20.104 | 6.795  | 25.015 |
| H | 20.145 | 6.764  | 24.059 |
| H | 19.476 | 7.492  | 25.204 |
| O | 21.823 | 4.798  | 23.765 |
| H | 22.025 | 4.211  | 23.036 |
| H | 21.345 | 5.523  | 23.363 |
| O | 19.611 | 5.653  | 27.727 |
| H | 19.863 | 6.067  | 26.902 |
| H | 18.656 | 5.606  | 27.69  |
| O | 16.545 | 12.364 | 33.541 |
| H | 16.979 | 13.211 | 33.433 |
| H | 16.058 | 12.239 | 32.727 |
| O | 30.367 | 10.927 | 30.614 |
| H | 30.137 | 11.095 | 29.7   |
| H | 30.953 | 10.171 | 30.578 |
| O | 17.607 | 15.234 | 36.321 |
| H | 16.795 | 15.74  | 36.301 |
| H | 18.274 | 15.862 | 36.598 |
| O | 12.184 | 10.356 | 35.113 |
| H | 12.223 | 9.4    | 35.141 |
| H | 11.306 | 10.569 | 35.428 |
| O | 21.627 | 14.793 | 35.471 |
| H | 20.715 | 14.509 | 35.401 |
| H | 21.725 | 15.062 | 36.384 |
| O | 22.582 | 8.671  | 21.629 |
| H | 22.293 | 7.763  | 21.724 |
| H | 23.441 | 8.695  | 22.051 |
| O | 19.672 | 12.13  | 20.083 |
| H | 18.909 | 11.736 | 19.661 |
| H | 19.929 | 11.496 | 20.753 |
| O | 25.745 | 8.456  | 19.464 |
| H | 26.1   | 7.602  | 19.219 |
| H | 25.767 | 8.46   | 20.421 |
| O | 14.942 | 7.964  | 12.04  |
| H | 14.351 | 7.747  | 12.761 |
| H | 15.77  | 8.182  | 12.468 |
| O | 25.469 | 4.58   | 12.551 |



|   |        |        |        |
|---|--------|--------|--------|
| H | 24.865 | 4.327  | 13.25  |
| H | 26.339 | 4.488  | 12.942 |
| O | 12.903 | 8.209  | 16.179 |
| H | 13.744 | 7.755  | 16.229 |
| H | 12.679 | 8.196  | 15.249 |
| O | 7.852  | 3.117  | 20.694 |
| H | 7.008  | 2.667  | 20.657 |
| H | 7.836  | 3.589  | 21.527 |
| O | 16.487 | 1.831  | 10.062 |
| H | 16.054 | 1.298  | 10.729 |
| H | 17.051 | 2.424  | 10.559 |
| O | 21.05  | 7.892  | 31.275 |
| H | 20.16  | 8.218  | 31.137 |
| H | 21.543 | 8.658  | 31.568 |
| O | 20.681 | 4.849  | 17.283 |
| H | 21.085 | 3.984  | 17.214 |
| H | 21.419 | 5.454  | 17.358 |
| O | 19.719 | 1.266  | 10.118 |
| H | 20.063 | 1.444  | 9.243  |
| H | 19.395 | 2.112  | 10.426 |
| O | 14.96  | 5.607  | 16.675 |
| H | 15.424 | 5.202  | 17.408 |
| H | 14.977 | 4.944  | 15.985 |
| O | 24.929 | 3.111  | 21.795 |
| H | 24.917 | 2.992  | 22.745 |
| H | 25.167 | 4.03   | 21.672 |
| O | 24.821 | 6.199  | 15.508 |
| H | 25.311 | 5.466  | 15.136 |
| H | 25.487 | 6.86   | 15.697 |
| O | 17.851 | 1.131  | 13.511 |
| H | 18.683 | 1.601  | 13.561 |
| H | 17.988 | 0.475  | 12.827 |
| O | 20.735 | 10.817 | 17.859 |
| H | 21.253 | 10.076 | 18.174 |
| H | 20.533 | 11.319 | 18.649 |
| O | 9.844  | 2.241  | 23.511 |
| H | 10.282 | 2.868  | 22.936 |
| H | 9.748  | 2.705  | 24.343 |
| O | 15.859 | 5.475  | 21.218 |
| H | 15.249 | 5.051  | 20.614 |
| H | 15.499 | 6.353  | 21.344 |
| O | 20.771 | 5.262  | 12.215 |
| H | 21.477 | 5.904  | 12.298 |
| H | 21.215 | 4.414  | 12.234 |
| O | 8.106  | 4.926  | 22.752 |
| H | 7.889  | 4.454  | 23.555 |
| H | 7.303  | 5.396  | 22.526 |

|   |        |        |        |
|---|--------|--------|--------|
| O | 26.792 | 11.473 | 29.652 |
| H | 26.509 | 10.976 | 30.419 |
| H | 27.726 | 11.276 | 29.57  |
| O | 16.933 | 4.598  | 13.488 |
| H | 17.476 | 5.37   | 13.65  |
| H | 16.31  | 4.881  | 12.818 |
| O | 16.408 | 0.042  | 15.543 |
| H | 16.811 | 0.545  | 14.835 |
| H | 15.959 | 0.698  | 16.077 |
| O | 28.411 | 7.405  | 31.387 |
| H | 28.362 | 6.777  | 30.667 |
| H | 28.396 | 8.261  | 30.96  |
| O | 18.595 | 4.874  | 20.615 |
| H | 17.733 | 4.934  | 21.028 |
| H | 18.43  | 5.061  | 19.69  |
| O | 21.641 | 5.335  | 8.322  |
| H | 20.956 | 4.874  | 7.837  |
| H | 21.963 | 4.69   | 8.952  |
| O | 12.953 | 7.93   | 10.109 |
| H | 13.588 | 7.892  | 10.824 |
| H | 12.94  | 7.042  | 9.752  |
| O | 18.496 | 3.178  | 11.406 |
| H | 18.224 | 3.555  | 12.242 |
| H | 18.84  | 3.92   | 10.908 |
| O | 22.777 | 7.188  | 13.749 |
| H | 23.243 | 6.495  | 14.218 |
| H | 22.565 | 7.833  | 14.424 |
| O | 16.939 | 5.794  | 26.44  |
| H | 16.577 | 4.923  | 26.601 |
| H | 17.047 | 5.837  | 25.49  |
| O | 12.259 | 0.176  | 15.993 |
| H | 12.091 | 0.693  | 15.205 |
| H | 11.427 | 0.183  | 16.466 |
| O | 21.614 | 1.321  | 20.076 |
| H | 20.826 | 1.184  | 19.551 |
| H | 21.514 | 2.205  | 20.431 |
| O | 31.542 | 4.771  | 23.447 |
| H | 31.094 | 3.938  | 23.3   |
| H | 32.441 | 4.613  | 23.159 |
| O | 29.843 | 2.243  | 23.641 |
| H | 29.688 | 1.597  | 22.952 |
| H | 29.238 | 1.997  | 24.341 |
| O | 23.139 | 3.281  | 9.665  |
| H | 23.681 | 2.631  | 9.217  |
| H | 23.748 | 3.748  | 10.237 |
| O | 22.325 | 8.632  | 18.507 |
| H | 23.08  | 9.21   | 18.608 |

|   |        |       |        |
|---|--------|-------|--------|
| H | 21.889 | 8.655 | 19.359 |
| O | 15.022 | 8.21  | 21.62  |
| H | 15.405 | 8.711 | 22.34  |
| H | 14.179 | 8.633 | 21.456 |
| O | 23.142 | 5.674 | 20.23  |
| H | 23.876 | 6.209 | 20.531 |
| H | 23.16  | 5.756 | 19.277 |
| O | 15.285 | 3.703 | 25.366 |
| H | 14.592 | 4.302 | 25.088 |
| H | 14.938 | 2.831 | 25.175 |
| O | 18.428 | 1.954 | 28.671 |
| H | 18.1   | 1.134 | 29.038 |
| H | 17.821 | 2.158 | 27.959 |
| O | 8.014  | 4.134 | 16.121 |
| H | 8.751  | 4     | 16.718 |
| H | 8.025  | 5.073 | 15.934 |
| O | 13.642 | 6.459 | 29.19  |
| H | 13.072 | 6.541 | 28.425 |
| H | 13.48  | 7.256 | 29.695 |
| O | 11.041 | 5.467 | 30.324 |
| H | 11.529 | 4.644 | 30.284 |
| H | 11.712 | 6.147 | 30.265 |
| O | 12.676 | 4.208 | 13.351 |
| H | 13.055 | 3.36  | 13.582 |
| H | 12.571 | 4.172 | 12.401 |
| O | 21.637 | 2.564 | 12.113 |
| H | 21.388 | 1.645 | 12.019 |
| H | 21.886 | 2.836 | 11.23  |
| O | 17.461 | 8.619 | 13.175 |
| H | 17.91  | 8.001 | 13.751 |
| H | 17.992 | 9.414 | 13.216 |
| O | 16.082 | 5.665 | 7.66   |
| H | 16.446 | 5.935 | 8.502  |
| H | 15.941 | 6.485 | 7.186  |
| O | 31.544 | 8.965 | 24.418 |
| H | 31.384 | 9.851 | 24.091 |
| H | 32.103 | 8.562 | 23.753 |
| O | 8.311  | 4.982 | 12.184 |
| H | 7.685  | 5.336 | 11.552 |
| H | 9.15   | 5.368 | 11.93  |
| O | 13.141 | 8.738 | 30.71  |
| H | 12.558 | 9.463 | 30.484 |
| H | 12.915 | 8.522 | 31.615 |
| O | 18.556 | 4.849 | 9.203  |
| H | 18.646 | 4.897 | 8.251  |
| H | 18.28  | 5.729 | 9.461  |
| O | 18.576 | 7.769 | 30.056 |

|   |        |        |        |
|---|--------|--------|--------|
| H | 18.811 | 8.652  | 29.77  |
| H | 17.767 | 7.572  | 29.582 |
| O | 16.549 | 9.056  | 23.942 |
| H | 17.251 | 8.693  | 24.482 |
| H | 16.269 | 9.842  | 24.409 |
| O | 30.934 | 1.068  | 11.932 |
| H | 31.649 | 1.018  | 11.298 |
| H | 30.608 | 0.171  | 11.997 |
| O | 15.341 | 4.813  | 11.239 |
| H | 14.9   | 5.548  | 10.812 |
| H | 16.027 | 4.555  | 10.623 |
| O | 16.938 | 5.183  | 23.867 |
| H | 16.594 | 5.433  | 23.009 |
| H | 16.63  | 4.286  | 23.996 |
| O | 20.073 | 10.385 | 33.793 |
| H | 19.201 | 10.02  | 33.637 |
| H | 20.269 | 10.157 | 34.701 |
| O | 19.849 | 6.507  | 22.403 |
| H | 19.182 | 7.037  | 21.965 |
| H | 19.777 | 5.645  | 21.994 |
| O | 24.671 | 1.656  | 26.943 |
| H | 23.924 | 1.472  | 27.513 |
| H | 25.157 | 0.832  | 26.913 |
| O | 16.233 | 7.417  | 28.481 |
| H | 15.46  | 6.937  | 28.779 |
| H | 16.505 | 6.962  | 27.684 |
| O | 14.159 | 3.839  | 19.885 |
| H | 13.926 | 3.704  | 18.966 |
| H | 13.77  | 3.094  | 20.343 |
| O | 10.132 | 4.984  | 17.568 |
| H | 10.398 | 4.3    | 18.183 |
| H | 10.626 | 4.794  | 16.771 |
| O | 13.207 | 10.901 | 16.462 |
| H | 13.966 | 10.894 | 15.878 |
| H | 12.945 | 9.983  | 16.526 |
| O | 23.406 | 10.236 | 25.781 |
| H | 23.432 | 9.436  | 26.307 |
| H | 24.233 | 10.677 | 25.974 |
| O | 26.761 | 5.183  | 10.151 |
| H | 26.488 | 5.243  | 11.066 |
| H | 26.044 | 5.582  | 9.659  |
| O | 22.438 | 2.8    | 16.266 |
| H | 22.092 | 1.912  | 16.356 |
| H | 23.145 | 2.849  | 16.909 |
| O | 31.231 | 4.656  | 28.656 |
| H | 31.963 | 5.271  | 28.604 |
| H | 31.219 | 4.225  | 27.802 |

|   |        |        |        |
|---|--------|--------|--------|
| O | 30.26  | 2.855  | 6.243  |
| H | 30.393 | 2.046  | 5.749  |
| H | 30.569 | 2.65   | 7.125  |
| O | 24.848 | 9.495  | 10.383 |
| H | 24.994 | 10.398 | 10.1   |
| H | 25.694 | 9.213  | 10.73  |
| O | 18.294 | 8.698  | 21.634 |
| H | 19.002 | 9.278  | 21.914 |
| H | 17.596 | 8.848  | 22.271 |
| O | 30.401 | 5.99   | 20.707 |
| H | 31.337 | 6.172  | 20.791 |
| H | 30.087 | 5.927  | 21.609 |
| O | 27.262 | 11.494 | 24.43  |
| H | 26.724 | 11.713 | 25.191 |
| H | 27.418 | 10.553 | 24.51  |
| O | 16.553 | 11.125 | 27.716 |
| H | 16.055 | 10.917 | 26.925 |
| H | 16.725 | 12.064 | 27.651 |
| O | 18.636 | 14.472 | 19.061 |
| H | 19.069 | 13.674 | 19.365 |
| H | 18.005 | 14.68  | 19.751 |
| O | 26.295 | 5.941  | 18.23  |
| H | 25.431 | 5.529  | 18.237 |
| H | 26.908 | 5.213  | 18.332 |
| O | 17.242 | 11.293 | 18.992 |
| H | 17.164 | 10.418 | 18.613 |
| H | 16.411 | 11.72  | 18.781 |
| O | 12.88  | 6.997  | 13.606 |
| H | 11.954 | 7.209  | 13.484 |
| H | 12.911 | 6.041  | 13.588 |
| O | 19.435 | 3.691  | 24.066 |
| H | 18.86  | 4.443  | 24.203 |
| H | 20.319 | 4.041  | 24.182 |
| O | 33.523 | 3.705  | 7.619  |
| H | 33.157 | 3.111  | 8.275  |
| H | 34.226 | 4.165  | 8.078  |
| O | 16.393 | 10.343 | 7.185  |
| H | 15.564 | 10.221 | 7.648  |
| H | 17.052 | 9.971  | 7.771  |
| O | 15.596 | 3.233  | 15.249 |
| H | 15.054 | 2.598  | 14.781 |
| H | 15.998 | 3.76   | 14.559 |
| O | 15.731 | 1.372  | 23.561 |
| H | 15.24  | 0.673  | 23.129 |
| H | 16.422 | 1.598  | 22.938 |
| O | 15.722 | 2.818  | 7.16   |
| H | 15.868 | 3.764  | 7.164  |

|   |        |        |        |
|---|--------|--------|--------|
| H | 15.943 | 2.538  | 8.048  |
| O | 26.97  | 8.357  | 5.414  |
| H | 27.478 | 8.981  | 4.896  |
| H | 26.506 | 8.898  | 6.053  |
| O | 25.578 | 3.142  | 8.252  |
| H | 26.122 | 3.413  | 8.991  |
| H | 26.148 | 3.237  | 7.488  |
| O | 13.282 | 5.508  | 8.597  |
| H | 14.08  | 5.491  | 8.068  |
| H | 12.576 | 5.625  | 7.961  |
| O | 11.883 | 15.87  | 9.605  |
| H | 12.188 | 16.476 | 10.28  |
| H | 11.015 | 16.195 | 9.365  |
| O | 30.16  | 5.468  | 5.684  |
| H | 30.04  | 4.585  | 6.033  |
| H | 31.037 | 5.456  | 5.3    |
| O | 24.408 | 5.797  | 8.197  |
| H | 24.597 | 4.874  | 8.027  |
| H | 23.453 | 5.857  | 8.155  |
| O | 26.397 | 5.797  | 5.436  |
| H | 25.455 | 5.768  | 5.602  |
| H | 26.59  | 6.727  | 5.314  |
| O | 19.994 | 12.734 | 3.459  |
| H | 19.497 | 12.009 | 3.839  |
| H | 20.241 | 13.274 | 4.21   |
| O | 10.105 | 6.966  | 13.376 |
| H | 9.583  | 7.713  | 13.084 |
| H | 9.494  | 6.429  | 13.881 |
| O | 35.099 | 12.063 | 5.613  |
| H | 34.572 | 12.613 | 6.192  |
| H | 35.173 | 11.229 | 6.077  |
| O | 28.455 | 2.576  | 12.437 |
| H | 29.256 | 2.052  | 12.414 |
| H | 28.719 | 3.397  | 12.852 |
| O | 23.081 | 5.726  | 4.176  |
| H | 22.895 | 6.65   | 4.347  |
| H | 22.219 | 5.312  | 4.137  |
| O | 13.611 | 12.388 | 5.838  |
| H | 13.832 | 13.156 | 6.364  |
| H | 12.667 | 12.28  | 5.957  |
| O | 12.332 | 8.912  | 6.415  |
| H | 12.728 | 8.122  | 6.046  |
| H | 11.429 | 8.659  | 6.608  |
| O | 23.42  | 2.243  | 6.443  |
| H | 23.643 | 2.269  | 5.513  |
| H | 24.151 | 1.78   | 6.852  |
| O | 24.303 | 15.474 | 8.769  |

|   |        |        |        |
|---|--------|--------|--------|
| H | 24.325 | 16.277 | 8.249  |
| H | 25.183 | 15.403 | 9.137  |
| O | 4.687  | 30.342 | 28.77  |
| H | 4.695  | 30.326 | 29.727 |
| H | 4.022  | 30.993 | 28.546 |
| O | 10.345 | 24.772 | 26.483 |
| H | 10.794 | 24.263 | 25.808 |
| H | 11.047 | 25.231 | 26.943 |
| O | 10.474 | 32.048 | 30.374 |
| H | 9.777  | 31.825 | 29.757 |
| H | 10.366 | 32.987 | 30.529 |
| O | 6.743  | 23.957 | 24.422 |
| H | 7.142  | 23.753 | 25.268 |
| H | 7.408  | 23.714 | 23.778 |
| O | 8.936  | 31.558 | 24.589 |
| H | 8.915  | 30.649 | 24.291 |
| H | 9.075  | 31.498 | 25.534 |
| O | 6.107  | 26.506 | 31.078 |
| H | 6.689  | 27.135 | 31.505 |
| H | 6.663  | 25.746 | 30.903 |
| O | 8.702  | 28.755 | 24.255 |
| H | 8.471  | 28.172 | 23.532 |
| H | 8.819  | 28.173 | 25.006 |
| O | 5.25   | 31.016 | 23.397 |
| H | 5.013  | 31.272 | 22.505 |
| H | 5.874  | 31.685 | 23.68  |
| O | 4.606  | 20.151 | 25.387 |
| H | 5.257  | 20.411 | 26.038 |
| H | 4.765  | 19.218 | 25.248 |
| O | 5.998  | 26.836 | 27.348 |
| H | 5.629  | 26.154 | 27.91  |
| H | 6.217  | 26.383 | 26.534 |
| O | 5.076  | 30.227 | 15.164 |
| H | 4.855  | 30.868 | 15.839 |
| H | 6.024  | 30.118 | 15.237 |
| O | 10.602 | 31.505 | 19.793 |
| H | 10.867 | 30.812 | 20.398 |
| H | 11.19  | 31.406 | 19.044 |
| O | 3.632  | 28.521 | 20.494 |
| H | 3.004  | 29.238 | 20.584 |
| H | 4.204  | 28.792 | 19.776 |
| O | 15.725 | 32.069 | 14.477 |
| H | 15.909 | 32.881 | 14.949 |
| H | 14.993 | 32.287 | 13.9   |
| O | 9.948  | 33.977 | 24.019 |
| H | 9.772  | 33.054 | 24.2   |
| H | 10.416 | 34.288 | 24.794 |

|   |        |        |        |
|---|--------|--------|--------|
| O | 11.233 | 24.062 | 21.261 |
| H | 10.486 | 23.476 | 21.134 |
| H | 11.931 | 23.493 | 21.584 |
| O | 9.091  | 33.038 | 21.442 |
| H | 9.701  | 32.509 | 20.927 |
| H | 9.546  | 33.186 | 22.272 |
| O | 9.48   | 27.556 | 15.717 |
| H | 10.067 | 26.861 | 15.418 |
| H | 9.744  | 27.719 | 16.622 |
| O | 11.536 | 26.417 | 22.465 |
| H | 10.698 | 26.726 | 22.807 |
| H | 11.308 | 25.667 | 21.915 |
| O | 5.142  | 32.122 | 17.253 |
| H | 4.677  | 32.925 | 17.485 |
| H | 6.034  | 32.26  | 17.571 |
| O | 7.942  | 27.289 | 21.811 |
| H | 7.106  | 26.846 | 21.668 |
| H | 7.809  | 28.17  | 21.461 |
| O | 2.604  | 28.95  | 14.983 |
| H | 2.35   | 28.957 | 14.06  |
| H | 3.534  | 29.178 | 14.977 |
| O | 7.008  | 32.241 | 19.061 |
| H | 7.54   | 32.768 | 19.657 |
| H | 6.219  | 32.036 | 19.562 |
| O | 4      | 27.148 | 29.762 |
| H | 4.753  | 26.857 | 30.276 |
| H | 4.361  | 27.341 | 28.897 |
| O | 4.777  | 32.134 | 20.893 |
| H | 4.834  | 33.065 | 21.107 |
| H | 3.858  | 31.911 | 21.04  |
| O | 8.065  | 29.45  | 19.317 |
| H | 8.059  | 30.407 | 19.313 |
| H | 7.166  | 29.204 | 19.098 |
| O | 12.427 | 28.253 | 11.606 |
| H | 12.447 | 27.435 | 12.103 |
| H | 13.199 | 28.734 | 11.905 |
| O | 7.57   | 23.724 | 19.557 |
| H | 6.861  | 23.086 | 19.479 |
| H | 7.503  | 24.255 | 18.763 |
| O | 5.349  | 29.145 | 18.434 |
| H | 5.198  | 28.382 | 17.877 |
| H | 4.992  | 29.88  | 17.937 |
| O | 2.42   | 25.93  | 22.193 |
| H | 3.271  | 26.149 | 21.814 |
| H | 2.52   | 26.11  | 23.128 |
| O | 14.853 | 24.985 | 32.463 |
| H | 15.796 | 24.817 | 32.475 |



|   |        |        |        |
|---|--------|--------|--------|
| H | 14.649 | 25.137 | 31.54  |
| O | 5.186  | 26.955 | 22.474 |
| H | 4.794  | 27.671 | 21.974 |
| H | 5.111  | 27.232 | 23.387 |
| O | 6.424  | 33.541 | 24.37  |
| H | 6.772  | 33.855 | 23.536 |
| H | 7.13   | 33.009 | 24.739 |
| O | 9.217  | 30.922 | 16.985 |
| H | 10.12  | 30.695 | 16.763 |
| H | 9.07   | 30.515 | 17.839 |
| O | 9.281  | 21.829 | 21.265 |
| H | 8.698  | 22.45  | 20.829 |
| H | 9.496  | 21.187 | 20.588 |
| O | 10.03  | 27.47  | 19.351 |
| H | 9.481  | 28.238 | 19.507 |
| H | 9.7    | 26.811 | 19.962 |
| O | 13.439 | 29.575 | 22.515 |
| H | 14.23  | 29.153 | 22.849 |
| H | 13.406 | 30.417 | 22.97  |
| O | 12.559 | 31.794 | 9.737  |
| H | 13.443 | 31.951 | 10.069 |
| H | 12.692 | 31.467 | 8.847  |
| O | 6.058  | 21.538 | 4.165  |
| H | 5.152  | 21.835 | 4.252  |
| H | 6.257  | 21.127 | 5.006  |
| O | 5.894  | 28.09  | 12.91  |
| H | 6.124  | 28.955 | 13.251 |
| H | 5.904  | 28.198 | 11.959 |
| O | 4.404  | 21.97  | 30.287 |
| H | 5.338  | 22.164 | 30.361 |
| H | 3.989  | 22.826 | 30.181 |
| O | 9.389  | 9.913  | 29.44  |
| H | 10.315 | 10.145 | 29.37  |
| H | 8.94   | 10.751 | 29.546 |
| O | 6.125  | 16.796 | 31.663 |
| H | 6.387  | 16.525 | 32.543 |
| H | 5.205  | 17.044 | 31.753 |
| O | 7.242  | 22.664 | 30.659 |
| H | 7.301  | 21.799 | 31.065 |
| H | 7.797  | 23.222 | 31.204 |
| O | 5.568  | 7.496  | 24.794 |
| H | 6.054  | 7.753  | 24.011 |
| H | 5.149  | 6.668  | 24.556 |
| O | 10.637 | 25.718 | 34.172 |
| H | 11.256 | 26.152 | 33.585 |
| H | 11.142 | 25.542 | 34.966 |
| O | 8.322  | 22.971 | 26.654 |

|   |       |        |        |
|---|-------|--------|--------|
| H | 7.712 | 23.213 | 27.351 |
| H | 8.996 | 23.651 | 26.679 |
| O | 2.879 | 9.273  | 29.66  |
| H | 2.837 | 8.332  | 29.831 |
| H | 1.964 | 9.551  | 29.626 |
| O | 1.47  | 15.364 | 30.518 |
| H | 0.944 | 15.818 | 29.859 |
| H | 0.877 | 14.711 | 30.889 |
| O | 4.743 | 11.206 | 29.318 |
| H | 4.246 | 10.418 | 29.537 |
| H | 4.84  | 11.172 | 28.366 |
| O | 7.694 | 13.829 | 26.977 |
| H | 6.99  | 13.731 | 26.335 |
| H | 8.345 | 14.375 | 26.537 |
| O | 7.121 | 15.997 | 28.933 |
| H | 6.785 | 15.262 | 28.42  |
| H | 6.596 | 15.99  | 29.733 |
| O | 3.119 | 18.475 | 18.734 |
| H | 3.746 | 17.906 | 18.288 |
| H | 2.54  | 18.786 | 18.038 |
| O | 0.385 | 19.926 | 30.295 |
| H | 0.513 | 20.829 | 30.585 |
| H | 0.117 | 20.003 | 29.38  |
| O | 8.495 | 8.206  | 19.487 |
| H | 9.292 | 8.272  | 18.961 |
| H | 8.139 | 7.343  | 19.276 |
| O | 8.48  | 19.274 | 32.209 |
| H | 7.707 | 19.438 | 32.749 |
| H | 9.123 | 19.915 | 32.51  |
| O | 6.032 | 20.944 | 32.651 |
| H | 5.35  | 20.305 | 32.448 |
| H | 5.564 | 21.775 | 32.738 |
| O | 4.097 | 19.322 | 28.952 |
| H | 4.788 | 19.211 | 28.3   |
| H | 4.032 | 20.269 | 29.074 |
| O | 7.118 | 8.55   | 22.881 |
| H | 7.965 | 8.684  | 23.306 |
| H | 7.173 | 9.058  | 22.072 |
| O | 3.798 | 21.594 | 23.096 |
| H | 3.677 | 20.919 | 22.428 |
| H | 4.474 | 21.241 | 23.674 |
| O | 8.488 | 24.09  | 33.35  |
| H | 7.829 | 24.419 | 33.961 |
| H | 9.301 | 24.515 | 33.623 |
| O | 1.708 | 18.856 | 27.048 |
| H | 1.092 | 18.274 | 27.495 |
| H | 2.199 | 19.273 | 27.756 |

|   |        |        |        |
|---|--------|--------|--------|
| O | 19.124 | 16.275 | 29.635 |
| H | 19.402 | 15.702 | 30.349 |
| H | 19.934 | 16.501 | 29.179 |
| O | 7.147  | 9.499  | 26.21  |
| H | 6.598  | 8.782  | 25.894 |
| H | 7.238  | 9.336  | 27.149 |
| O | 4.178  | 18.572 | 31.969 |
| H | 4.452  | 18.81  | 31.083 |
| H | 3.226  | 18.49  | 31.911 |
| O | 4.57   | 23.485 | 33.189 |
| H | 4.878  | 24.349 | 32.916 |
| H | 4.168  | 23.633 | 34.045 |
| O | 0.543  | 16.788 | 22.555 |
| H | 0.179  | 17.376 | 23.216 |
| H | -0.1   | 16.798 | 21.845 |
| O | 11.99  | 9.548  | 24.076 |
| H | 11.727 | 10.048 | 23.304 |
| H | 11.218 | 9.557  | 24.642 |
| O | 7.189  | 8.392  | 28.781 |
| H | 8.025  | 8.858  | 28.77  |
| H | 6.659  | 8.866  | 29.422 |
| O | 12.544 | 23.066 | 34.472 |
| H | 12.227 | 23.41  | 33.637 |
| H | 13.492 | 23.2   | 34.442 |
| O | 11.833 | 10.956 | 29.762 |
| H | 12.33  | 11.567 | 30.306 |
| H | 11.999 | 11.243 | 28.865 |
| O | 11.687 | 17.244 | 31.975 |
| H | 11.846 | 17.457 | 31.055 |
| H | 10.755 | 17.029 | 32.013 |
| O | 0.501  | 21.367 | 16.215 |
| H | -0.249 | 21.63  | 15.683 |
| H | 0.118  | 21.07  | 17.04  |
| O | 10.627 | 16.069 | 14.79  |
| H | 10.043 | 16.794 | 15.01  |
| H | 11.485 | 16.478 | 14.678 |
| O | 7.258  | 25.223 | 17.33  |
| H | 7.475  | 26.051 | 17.759 |
| H | 6.914  | 25.48  | 16.474 |
| O | 3.771  | 27.314 | 16.874 |
| H | 3.12   | 27.873 | 16.45  |
| H | 3.268  | 26.572 | 17.21  |
| O | 2.147  | 23.887 | 12.856 |
| H | 2.515  | 24.767 | 12.931 |
| H | 1.356  | 23.911 | 13.393 |
| O | 2.333  | 8.525  | 20.951 |
| H | 2.882  | 9.206  | 20.562 |

|   |        |        |        |
|---|--------|--------|--------|
| H | 2.071  | 8.884  | 21.799 |
| O | 7.461  | 13.033 | 12.694 |
| H | 7.663  | 12.851 | 11.777 |
| H | 7.797  | 12.273 | 13.17  |
| O | 4.969  | 14.157 | 19.343 |
| H | 5.51   | 14.933 | 19.496 |
| H | 5.238  | 13.844 | 18.479 |
| O | 0.761  | 22.655 | 10.39  |
| H | 0.069  | 21.994 | 10.423 |
| H | 0.56   | 23.25  | 11.112 |
| O | -0.166 | 18.377 | 14.564 |
| H | 0.606  | 18.325 | 15.128 |
| H | 0.185  | 18.566 | 13.694 |
| O | -1.734 | 21.624 | 21.903 |
| H | -2.079 | 20.81  | 21.536 |
| H | -0.842 | 21.405 | 22.174 |
| O | 5.269  | 16.773 | 17.728 |
| H | 5.056  | 17.109 | 16.857 |
| H | 5.421  | 15.838 | 17.593 |
| O | 6.669  | 17.421 | 14.285 |
| H | 5.782  | 17.404 | 14.643 |
| H | 7.076  | 16.619 | 14.614 |
| O | 3.784  | 19.597 | 21.196 |
| H | 3.605  | 19.147 | 20.371 |
| H | 3.726  | 18.91  | 21.861 |
| O | 3.905  | 17.383 | 12.472 |
| H | 4.436  | 16.586 | 12.481 |
| H | 4.476  | 18.055 | 12.844 |
| O | 3.485  | 18.341 | 8.264  |
| H | 2.83   | 19.039 | 8.275  |
| H | 3.121  | 17.661 | 8.831  |
| O | 6.793  | 20.993 | 16.992 |
| H | 7.708  | 21.26  | 17.083 |
| H | 6.708  | 20.232 | 17.566 |
| O | 10.889 | 20.232 | 15.06  |
| H | 10.994 | 20.785 | 14.286 |
| H | 11.766 | 20.18  | 15.439 |
| O | 2.773  | 8.093  | 25.886 |
| H | 3.645  | 7.765  | 25.665 |
| H | 2.412  | 7.434  | 26.479 |
| O | 6.589  | 20.397 | 27.023 |
| H | 7.251  | 21.087 | 27.054 |
| H | 6.629  | 19.987 | 27.887 |
| O | 9.581  | 23.657 | 7.735  |
| H | 8.647  | 23.449 | 7.725  |
| H | 9.693  | 24.292 | 7.027  |
| O | 7.393  | 32.279 | 14.198 |

|   |        |        |        |
|---|--------|--------|--------|
| H | 7.596  | 32.084 | 13.283 |
| H | 7.391  | 31.425 | 14.63  |
| O | 10.311 | 13.591 | 14.341 |
| H | 11.167 | 13.391 | 13.961 |
| H | 10.27  | 14.547 | 14.347 |
| O | 22.708 | 27.764 | 19.976 |
| H | 23.029 | 28.05  | 20.831 |
| H | 21.756 | 27.738 | 20.074 |
| O | -0.206 | 17.112 | 19.964 |
| H | -0.972 | 17.412 | 19.474 |
| H | 0.313  | 17.904 | 20.105 |
| O | 1.962  | 21.501 | 25.597 |
| H | 2.79   | 21.096 | 25.337 |
| H | 1.505  | 20.818 | 26.087 |
| O | 6.059  | 26.458 | 15.133 |
| H | 6.193  | 27.093 | 14.43  |
| H | 5.346  | 26.826 | 15.655 |
| O | 2.045  | 20.661 | 9.009  |
| H | 1.201  | 20.343 | 8.689  |
| H | 1.822  | 21.389 | 9.59   |
| O | 2.22   | 19.398 | 16.242 |
| H | 2.93   | 20.007 | 16.038 |
| H | 1.421  | 19.898 | 16.078 |
| O | 15.493 | 21.324 | 26.146 |
| H | 15.28  | 22.159 | 25.728 |
| H | 15.233 | 21.441 | 27.059 |
| O | 4.397  | 14.864 | 26.829 |
| H | 4.099  | 14.296 | 26.118 |
| H | 3.934  | 14.542 | 27.603 |
| O | 1.231  | 14.122 | 21.62  |
| H | 2.085  | 14.173 | 22.051 |
| H | 0.684  | 14.746 | 22.097 |
| O | 4.572  | 17.526 | 26.449 |
| H | 4.46   | 16.583 | 26.567 |
| H | 3.879  | 17.918 | 26.982 |
| O | 0.663  | 14.711 | 19.07  |
| H | 1.194  | 14.411 | 19.808 |
| H | 0.299  | 15.546 | 19.362 |
| O | 9.923  | 11.473 | 21.452 |
| H | 10.413 | 11.212 | 20.673 |
| H | 10.595 | 11.737 | 22.08  |
| O | 9.436  | 21.342 | 17.242 |
| H | 9.867  | 22.169 | 17.025 |
| H | 9.86   | 20.696 | 16.678 |
| O | 3.731  | 9.172  | 10.346 |
| H | 3.495  | 9.931  | 9.813  |
| H | 4.038  | 9.545  | 11.172 |

|   |        |        |        |
|---|--------|--------|--------|
| O | 0.21   | 18.485 | 24.775 |
| H | -0.489 | 19.116 | 24.947 |
| H | 0.771  | 18.534 | 25.549 |
| O | 6.095  | 12.989 | 6.633  |
| H | 5.354  | 13.456 | 7.02   |
| H | 6.795  | 13.642 | 6.594  |
| O | 0.843  | 21.235 | 22.914 |
| H | 1.288  | 21.945 | 22.451 |
| H | 1.186  | 21.28  | 23.806 |
| O | 6.216  | 20.945 | 14.084 |
| H | 5.983  | 20.699 | 14.979 |
| H | 6.268  | 21.9   | 14.103 |
| O | 12.158 | 18.656 | 26.6   |
| H | 11.225 | 18.793 | 26.439 |
| H | 12.596 | 19.249 | 25.989 |
| O | 10.421 | 24.811 | 14.196 |
| H | 10.087 | 25.32  | 13.456 |
| H | 11.367 | 24.955 | 14.177 |
| O | 13.184 | 21.666 | 21.343 |
| H | 13.397 | 20.762 | 21.574 |
| H | 12.751 | 21.6   | 20.492 |
| O | -0.085 | 11.509 | 23.791 |
| H | -1.011 | 11.418 | 24.015 |
| H | 0.262  | 12.112 | 24.448 |
| O | 2.545  | 25.539 | 8.232  |
| H | 3.178  | 25.125 | 8.818  |
| H | 1.959  | 26.022 | 8.816  |
| O | 4.004  | 23.979 | 24.467 |
| H | 4.953  | 24.109 | 24.476 |
| H | 3.884  | 23.118 | 24.067 |
| O | 16.458 | 16.79  | 6.819  |
| H | 16.051 | 17.121 | 6.019  |
| H | 17.349 | 16.558 | 6.557  |
| O | 8.511  | 15.399 | 24.713 |
| H | 8.957  | 16.163 | 24.349 |
| H | 7.882  | 15.144 | 24.038 |
| O | 1.333  | 12.491 | 14.201 |
| H | 0.715  | 11.957 | 13.701 |
| H | 0.791  | 12.943 | 14.847 |
| O | 8.856  | 11.454 | 17.814 |
| H | 9.752  | 11.453 | 18.151 |
| H | 8.62   | 12.381 | 17.765 |
| O | 11.364 | 11.877 | 18.304 |
| H | 11.246 | 12.788 | 18.033 |
| H | 12.181 | 11.607 | 17.884 |
| O | 2.885  | 21.121 | 13.352 |
| H | 3.436  | 21.175 | 14.133 |

|   |        |        |        |
|---|--------|--------|--------|
| H | 2.753  | 22.032 | 13.088 |
| O | 11.853 | 25.183 | 18.281 |
| H | 11.887 | 24.91  | 19.198 |
| H | 11.671 | 26.122 | 18.318 |
| O | 3.625  | 24.452 | 29.114 |
| H | 3.218  | 24.258 | 28.27  |
| H | 3.49   | 25.392 | 29.234 |
| O | 6.652  | 23.165 | 7.563  |
| H | 5.94   | 23.625 | 7.117  |
| H | 6.424  | 22.239 | 7.486  |
| O | 6.307  | 20.313 | 6.796  |
| H | 5.732  | 20.347 | 7.561  |
| H | 7.167  | 20.091 | 7.153  |
| O | 5.727  | 16.408 | 23.623 |
| H | 4.838  | 16.737 | 23.752 |
| H | 6.176  | 16.598 | 24.447 |
| O | 2.533  | 16.056 | 10.036 |
| H | 2.797  | 16.626 | 10.757 |
| H | 2.542  | 15.175 | 10.411 |
| O | 1.654  | 17.855 | 31.858 |
| H | 1.016  | 18.441 | 31.453 |
| H | 1.63   | 17.065 | 31.319 |
| O | 5.582  | 11.634 | 25.208 |
| H | 5.295  | 11.249 | 24.379 |
| H | 6.379  | 11.152 | 25.432 |
| O | 8.719  | 11.419 | 14.191 |
| H | 8.544  | 10.991 | 15.029 |
| H | 9.495  | 11.956 | 14.354 |
| O | 6.273  | 23.876 | 28.295 |
| H | 5.336  | 24.071 | 28.309 |
| H | 6.473  | 23.596 | 29.188 |
| O | 7.502  | 15.379 | 6.721  |
| H | 7.356  | 16.087 | 6.093  |
| H | 8.428  | 15.158 | 6.621  |
| O | 6.503  | 23.859 | 13.896 |
| H | 7.332  | 23.712 | 14.352 |
| H | 6.243  | 24.744 | 14.152 |
| O | -0.864 | 20.421 | 27.416 |
| H | -0.999 | 21.234 | 27.905 |
| H | -1.027 | 20.661 | 26.504 |
| O | 13.069 | 12.808 | 13.633 |
| H | 13.689 | 12.119 | 13.395 |
| H | 13.468 | 13.241 | 14.388 |
| O | 6.632  | 18.898 | 19.134 |
| H | 6.882  | 18.464 | 19.949 |
| H | 6.162  | 18.226 | 18.64  |
| O | 4.124  | 21.273 | 16.129 |

|   |        |        |        |
|---|--------|--------|--------|
| H | 3.35   | 21.534 | 16.628 |
| H | 4.86   | 21.629 | 16.627 |
| O | 10.827 | 15.006 | 21.802 |
| H | 11.27  | 15.512 | 21.121 |
| H | 10.502 | 15.664 | 22.417 |
| O | 11.4   | 11.911 | 26.723 |
| H | 12.157 | 12.312 | 27.149 |
| H | 11.041 | 12.605 | 26.17  |
| O | 3.261  | 17.644 | 23.186 |
| H | 2.591  | 17.011 | 22.925 |
| H | 2.892  | 18.08  | 23.954 |
| O | 8.779  | 9.041  | 16.468 |
| H | 9.601  | 8.686  | 16.807 |
| H | 8.641  | 9.844  | 16.97  |
| O | 11.083 | 14.387 | 17.521 |
| H | 10.829 | 15.24  | 17.873 |
| H | 11.042 | 14.498 | 16.572 |
| O | 5.413  | 14.961 | 12.896 |
| H | 5.8    | 14.634 | 12.084 |
| H | 6.119  | 15.452 | 13.317 |
| O | 13.664 | 10.862 | 21.141 |
| H | 13.498 | 10.818 | 20.199 |
| H | 13.795 | 11.794 | 21.317 |
| O | -0.71  | 23.215 | 14.01  |
| H | -1.103 | 23.669 | 13.264 |
| H | -1.154 | 22.368 | 14.036 |
| O | 8.069  | 13.676 | 10.149 |
| H | 7.756  | 14.578 | 10.086 |
| H | 8.456  | 13.497 | 9.292  |
| O | 10.412 | 23.596 | 16.652 |
| H | 10.728 | 24.219 | 17.306 |
| H | 10.385 | 24.097 | 15.837 |
| O | 7.234  | 18.164 | 22.144 |
| H | 7.628  | 18.837 | 22.698 |
| H | 6.779  | 17.586 | 22.756 |
| O | 3.627  | 10.43  | 19.518 |
| H | 4.527  | 10.501 | 19.2   |
| H | 3.137  | 11.062 | 18.991 |
| O | -0.682 | 23.494 | 18.373 |
| H | -0.182 | 23.657 | 17.574 |
| H | -0.783 | 22.543 | 18.404 |
| O | 2.237  | 25.187 | 17.955 |
| H | 2.404  | 24.257 | 18.109 |
| H | 1.633  | 25.202 | 17.212 |
| O | -2.174 | 13.688 | 22.493 |
| H | -1.449 | 13.474 | 21.905 |
| H | -2.204 | 12.958 | 23.111 |



|   |        |        |        |
|---|--------|--------|--------|
| O | 5.534  | 13.837 | 16.786 |
| H | 6.369  | 13.912 | 16.323 |
| H | 4.893  | 13.663 | 16.096 |
| O | 5.395  | 8.355  | 14.092 |
| H | 5.816  | 8.521  | 13.249 |
| H | 5.609  | 9.123  | 14.622 |
| O | 3.976  | 13.497 | 14.707 |
| H | 4.316  | 14.117 | 14.062 |
| H | 3.096  | 13.285 | 14.395 |
| O | 9.675  | 23.694 | 10.775 |
| H | 9.012  | 23.8   | 10.092 |
| H | 9.783  | 24.572 | 11.142 |
| O | 1.489  | 9.144  | 23.571 |
| H | 2.192  | 9.184  | 24.22  |
| H | 0.955  | 9.918  | 23.749 |
| O | 5.391  | 21.911 | 19.72  |
| H | 5.166  | 21.406 | 20.501 |
| H | 5.839  | 21.286 | 19.15  |
| O | 12.569 | 24.472 | 7.065  |
| H | 12.548 | 24.004 | 6.23   |
| H | 12.711 | 25.387 | 6.823  |
| O | 14.777 | 24.405 | 4.634  |
| H | 14.044 | 25.004 | 4.5    |
| H | 14.368 | 23.581 | 4.9    |
| O | 12.741 | 18.302 | 11.121 |
| H | 11.822 | 18.561 | 11.053 |
| H | 13.228 | 19.063 | 10.804 |
| O | 9.448  | 11.714 | 4.87   |
| H | 10.136 | 11.251 | 4.392  |
| H | 9.076  | 12.319 | 4.229  |
| O | 7.156  | 17.716 | 5.352  |
| H | 6.524  | 18.238 | 5.846  |
| H | 7.011  | 17.965 | 4.439  |
| O | 1.5    | 18.804 | 12.493 |
| H | 2.136  | 18.091 | 12.448 |
| H | 2.028  | 19.587 | 12.65  |
| O | 5.821  | 22.106 | 11.546 |
| H | 6.054  | 21.497 | 12.247 |
| H | 5.888  | 22.972 | 11.949 |
| O | 5.855  | 18.556 | 9.479  |
| H | 5.073  | 18.545 | 8.927  |
| H | 5.735  | 19.315 | 10.049 |
| O | 7.844  | 17.634 | 2.736  |
| H | 6.959  | 17.315 | 2.557  |
| H | 8.41   | 17.085 | 2.195  |
| O | 10.039 | 25.203 | 5.163  |
| H | 9.754  | 25.149 | 4.251  |

|   |        |        |        |
|---|--------|--------|--------|
| H | 10.951 | 25.489 | 5.112  |
| O | 3.799  | 11.957 | 9.042  |
| H | 2.9    | 11.643 | 8.941  |
| H | 3.756  | 12.884 | 8.809  |
| O | 17.704 | 30.231 | 4.664  |
| H | 16.992 | 29.592 | 4.69   |
| H | 17.653 | 30.681 | 5.507  |
| O | 2.897  | 22.367 | 18.607 |
| H | 2.381  | 22.61  | 19.376 |
| H | 3.805  | 22.41  | 18.905 |
| O | 3.647  | 14.43  | 7.9    |
| H | 3.874  | 15.139 | 8.503  |
| H | 3.352  | 14.876 | 7.106  |
| O | 6.791  | 10.488 | 31.169 |
| H | 6.071  | 10.783 | 30.612 |
| H | 7.44   | 11.19  | 31.115 |
| O | 1.257  | 12.786 | 25.718 |
| H | 1.65   | 12.075 | 26.224 |
| H | 2.003  | 13.281 | 25.38  |
| O | 9.658  | 11.537 | 32.303 |
| H | 9.931  | 12.423 | 32.541 |
| H | 10.377 | 11.199 | 31.77  |
| O | 9.318  | 7.327  | 31.798 |
| H | 9.709  | 6.665  | 31.228 |
| H | 9.129  | 8.063  | 31.215 |
| O | 12.931 | 3.273  | 17.436 |
| H | 12.703 | 3.692  | 16.607 |
| H | 12.125 | 3.307  | 17.951 |
| O | 7.251  | 6.844  | 15.615 |
| H | 6.588  | 7.247  | 15.053 |
| H | 7.767  | 7.581  | 15.942 |
| O | 2.558  | 12.333 | 18.335 |
| H | 3.227  | 13.006 | 18.461 |
| H | 1.729  | 12.788 | 18.484 |
| O | 3.128  | 5.841  | 20.993 |
| H | 2.741  | 5.388  | 20.244 |
| H | 2.93   | 6.766  | 20.843 |
| O | 0.115  | 11.654 | 20.84  |
| H | 0.054  | 11.458 | 21.775 |
| H | 0.577  | 12.492 | 20.801 |
| O | 4.807  | 11.141 | 12.472 |
| H | 5.275  | 11.949 | 12.681 |
| H | 5.358  | 10.445 | 12.831 |
| O | 5.73   | 5.914  | 22.26  |
| H | 4.929  | 5.588  | 21.849 |
| H | 5.814  | 6.812  | 21.941 |
| O | 4.03   | 5.98   | 13.706 |

|   |        |        |        |
|---|--------|--------|--------|
| H | 4.191  | 5.319  | 14.379 |
| H | 4.616  | 6.702  | 13.934 |
| O | 6.717  | 9.08   | 11.526 |
| H | 7.552  | 9.269  | 11.955 |
| H | 6.757  | 9.563  | 10.701 |
| O | 4.226  | 5.182  | 25.084 |
| H | 3.286  | 5.346  | 25.166 |
| H | 4.283  | 4.325  | 24.662 |
| O | 8.689  | 4.629  | 29.333 |
| H | 8.708  | 4.631  | 28.376 |
| H | 9.516  | 5.037  | 29.59  |
| O | 8.687  | 16.129 | 12.3   |
| H | 8.632  | 16.325 | 11.364 |
| H | 8.437  | 15.207 | 12.366 |
| O | 10.657 | 7.817  | 17.783 |
| H | 10.612 | 6.874  | 17.626 |
| H | 11.563 | 8.05   | 17.581 |
| O | 4.919  | 11.137 | 22.608 |
| H | 5.588  | 10.882 | 21.972 |
| H | 4.279  | 11.632 | 22.097 |
| O | 10.74  | 3.03   | 19.242 |
| H | 11.464 | 2.668  | 19.752 |
| H | 9.958  | 2.618  | 19.609 |
| O | 8.35   | 7.322  | 8.341  |
| H | 7.428  | 7.472  | 8.546  |
| H | 8.606  | 8.083  | 7.819  |
| O | 5.473  | 5.613  | 17.633 |
| H | 6.216  | 5.525  | 18.229 |
| H | 5.848  | 5.988  | 16.836 |
| O | 2.432  | 10.593 | 26.866 |
| H | 2.736  | 9.868  | 26.32  |
| H | 2.518  | 10.269 | 27.763 |
| O | 1.934  | 10.309 | 12.403 |
| H | 2.875  | 10.475 | 12.459 |
| H | 1.825  | 9.428  | 12.761 |
| O | 3.479  | 13.834 | 29.747 |
| H | 3.124  | 13.02  | 30.104 |
| H | 2.83   | 14.499 | 29.977 |
| O | 14.027 | 13.954 | 10.726 |
| H | 13.286 | 14.48  | 10.426 |
| H | 13.64  | 13.308 | 11.316 |
| O | 12.289 | 4.021  | 10.767 |
| H | 11.396 | 4.363  | 10.731 |
| H | 12.763 | 4.52   | 10.102 |
| O | 4.941  | 10.54  | 15.659 |
| H | 4.883  | 10.595 | 16.613 |
| H | 4.572  | 11.367 | 15.349 |

|   |       |        |       |
|---|-------|--------|-------|
| O | 6.883 | 16.082 | 9.474 |
| H | 6.474 | 16.936 | 9.614 |
| H | 6.708 | 15.881 | 8.554 |
| O | 6.333 | 11.028 | 9.802 |
| H | 5.588 | 11.333 | 9.284 |
| H | 6.387 | 11.646 | 10.53 |
| O | 9.439 | 9.527  | 6.601 |
| H | 9.69  | 10.061 | 5.847 |
| H | 8.541 | 9.795  | 6.796 |

**Table S21. PYP chromophore + 94 waters (precision data for Figure 3)**

|   |             |             |             |
|---|-------------|-------------|-------------|
| C | 24.87854583 | 16.93508185 | 19.77644434 |
| C | 26.06455366 | 16.41537534 | 20.26443393 |
| C | 27.24438489 | 16.91126685 | 19.73714606 |
| C | 27.18116731 | 17.84022176 | 18.70588369 |
| C | 25.96663472 | 18.3361054  | 18.20122322 |
| C | 24.77863403 | 17.88683787 | 18.77242889 |
| S | 23.21217583 | 16.26416599 | 20.45740647 |
| C | 22.35365666 | 17.74837809 | 21.15466747 |
| C | 21.07064747 | 17.48397556 | 21.79480065 |
| O | 22.82585138 | 18.86945907 | 20.93316262 |
| C | 20.27198543 | 18.43109907 | 22.39945912 |
| C | 18.98339378 | 18.13741276 | 23.0334717  |
| C | 18.43442228 | 19.04319889 | 23.93319941 |
| C | 17.17598267 | 18.867445   | 24.48468975 |
| C | 16.36920274 | 17.73084068 | 24.12323415 |
| C | 17.01900732 | 16.74868902 | 23.28583511 |
| C | 18.24722522 | 17.0109762  | 22.69905442 |
| O | 15.1447425  | 17.4540968  | 24.52964162 |
| H | 26.00796207 | 15.66070546 | 21.04732886 |
| H | 28.2300527  | 16.59089817 | 20.02432207 |
| H | 28.12774586 | 18.0812081  | 18.23676255 |
| H | 25.89750853 | 18.97643559 | 17.36328565 |
| H | 23.844691   | 18.33664122 | 18.53946663 |
| H | 20.64170195 | 16.48055584 | 21.71227483 |
| H | 20.61252427 | 19.46554487 | 22.53547447 |
| H | 19.10891647 | 19.83675218 | 24.16754114 |
| H | 16.77248308 | 19.43057637 | 25.28612393 |
| H | 16.47720206 | 15.88521723 | 23.10637012 |
| H | 18.6213429  | 16.26121226 | 22.05042644 |
| O | 15.92437658 | 10.64357998 | 17.97337591 |
| H | 15.17938383 | 10.31707415 | 18.50034119 |
| H | 15.69565438 | 11.54156085 | 17.6446522  |
| O | 21.09832719 | 23.81224548 | 21.61045666 |
| H | 20.52179784 | 24.19458342 | 22.30885443 |
| H | 21.15124706 | 24.6012731  | 21.0314029  |
| O | 20.47708653 | 17.39530709 | 28.7865276  |
| H | 21.19144109 | 17.07471448 | 28.21725847 |
| H | 20.52821622 | 16.68253476 | 29.42372927 |
| O | 20.80134603 | 20.79658423 | 25.05925307 |
| H | 21.19492989 | 21.23067913 | 24.30744811 |
| H | 21.60951881 | 20.64591707 | 25.49452615 |
| O | 23.52054676 | 18.82946132 | 16.55196016 |
| H | 22.65909536 | 18.40160485 | 16.4501054  |
| H | 24.09273545 | 18.4979726  | 15.86932382 |
| O | 17.87111763 | 11.17820496 | 16.02331125 |

|   |             |             |             |
|---|-------------|-------------|-------------|
| H | 17.75825346 | 10.667634   | 15.24872738 |
| H | 17.33059709 | 10.70614585 | 16.67057882 |
| O | 20.84025139 | 18.14118676 | 16.94126412 |
| H | 20.31331969 | 17.8597376  | 17.72229658 |
| H | 20.34858457 | 17.66786379 | 16.28486305 |
| O | 20.22232616 | 14.76072518 | 21.50807285 |
| H | 20.10550015 | 13.81921528 | 21.4812513  |
| H | 19.73963168 | 14.96126177 | 20.70140318 |
| O | 21.19521158 | 20.62666188 | 18.01087294 |
| H | 21.0406611  | 19.79455497 | 17.57262623 |
| H | 21.37755211 | 21.06530682 | 17.17087256 |
| O | 23.84144816 | 15.60251351 | 16.2814173  |
| H | 23.64549308 | 16.14596271 | 17.0360695  |
| H | 23.17029356 | 14.91064572 | 16.22808949 |
| O | 19.64215896 | 14.05721798 | 24.18567415 |
| H | 19.32639968 | 14.43964723 | 25.01805866 |
| H | 19.61917033 | 14.80788126 | 23.57068137 |
| O | 18.35860499 | 18.63390744 | 27.65461787 |
| H | 19.18289385 | 18.33362477 | 28.0837124  |
| H | 17.73390546 | 17.92747327 | 27.93632535 |
| O | 11.559682   | 18.77720051 | 25.09399588 |
| H | 12.0497438  | 17.95188067 | 24.99210858 |
| H | 10.90037753 | 18.72356845 | 25.81357258 |
| O | 13.63775064 | 17.22823601 | 22.40866174 |
| H | 13.14121651 | 18.01577332 | 22.69953429 |
| H | 14.29880623 | 17.1413041  | 23.1220196  |
| O | 18.85732157 | 18.0240199  | 19.13093421 |
| H | 19.46480616 | 18.74459057 | 19.31852851 |
| H | 17.99975158 | 18.4039384  | 19.01750651 |
| O | 23.34377667 | 15.92442951 | 13.24914415 |
| H | 22.52758957 | 15.70863199 | 13.71911872 |
| H | 23.54202303 | 15.14772972 | 12.7475841  |
| O | 19.96137619 | 21.64460836 | 20.37729693 |
| H | 20.39039007 | 21.45585798 | 19.5315199  |
| H | 20.54593149 | 22.31450664 | 20.68715835 |
| O | 18.146802   | 16.90039519 | 15.45758641 |
| H | 17.2939276  | 16.46290407 | 15.51455272 |
| H | 17.90216337 | 17.71629424 | 15.90733526 |
| O | 19.73962872 | 24.50240955 | 23.86991087 |
| H | 18.98211294 | 23.9677852  | 24.13841076 |
| H | 20.46581312 | 24.26567868 | 24.43062405 |
| O | 15.54579778 | 16.20253799 | 16.36337759 |
| H | 15.72372157 | 17.1015871  | 16.67525978 |
| H | 14.71914975 | 16.01815912 | 16.84274015 |
| O | 22.97797023 | 21.38241805 | 13.10711794 |
| H | 23.8018045  | 21.71794706 | 12.69965302 |
| H | 22.99264343 | 20.44059331 | 12.94107198 |

|   |             |             |             |
|---|-------------|-------------|-------------|
| O | 14.39866736 | 9.892369175 | 20.54409901 |
| H | 13.92130081 | 9.459013201 | 21.26545527 |
| H | 15.24064662 | 9.998844677 | 21.013136   |
| O | 18.5177019  | 21.24004756 | 26.76273746 |
| H | 18.63118798 | 20.33257836 | 27.05805394 |
| H | 19.36383617 | 21.41624442 | 26.32098503 |
| O | 15.936212   | 13.43395535 | 17.06918627 |
| H | 15.425141   | 13.63698678 | 17.85346062 |
| H | 15.79950881 | 14.28783339 | 16.67971368 |
| O | 12.70639179 | 16.46331836 | 25.88735719 |
| H | 13.16696203 | 16.77475147 | 26.69397    |
| H | 13.32694521 | 16.72462849 | 25.1966184  |
| O | 23.9201778  | 16.43316004 | 24.49825512 |
| H | 23.89394076 | 15.55320618 | 24.0426605  |
| H | 23.18743345 | 16.80658655 | 23.9991502  |
| O | 22.43813852 | 21.79532106 | 22.89956977 |
| H | 21.98501871 | 22.56005727 | 22.47990778 |
| H | 22.86985795 | 21.29106476 | 22.20644741 |
| O | 13.19464392 | 8.867385256 | 23.07134624 |
| H | 13.88265201 | 8.273766732 | 23.42758008 |
| H | 12.86853299 | 9.414957911 | 23.81257799 |
| O | 17.69335303 | 20.88186411 | 18.2831471  |
| H | 18.51640802 | 21.35121565 | 18.23666362 |
| H | 17.42918664 | 20.96284931 | 19.20431265 |
| O | 14.8726375  | 20.62467252 | 20.71847574 |
| H | 14.77103241 | 21.03617002 | 21.5502667  |
| H | 15.81143832 | 20.75540666 | 20.53286587 |
| O | 17.49319546 | 20.37240771 | 20.98231526 |
| H | 18.28710937 | 20.90812565 | 21.14136244 |
| H | 17.46564003 | 19.83332619 | 21.75324607 |
| O | 13.78623731 | 19.58623316 | 23.52977957 |
| H | 14.38243825 | 18.87845095 | 23.81352728 |
| H | 13.03037361 | 19.52514081 | 24.14486089 |
| O | 23.2666381  | 21.32152477 | 19.96799697 |
| H | 23.06784815 | 20.45056341 | 20.33589724 |
| H | 23.09494387 | 21.12193662 | 19.05298632 |
| O | 24.22438164 | 23.88310087 | 20.46457737 |
| H | 24.99233229 | 23.29639064 | 20.43698264 |
| H | 23.49541985 | 23.24579738 | 20.39341024 |
| O | 21.3130103  | 14.54357744 | 15.74011665 |
| H | 20.57448477 | 14.77760287 | 15.17670491 |
| H | 20.88554031 | 14.06661796 | 16.4539949  |
| O | 15.1600507  | 21.85057835 | 24.64915773 |
| H | 15.71154715 | 22.31108433 | 24.03009912 |
| H | 14.96503956 | 21.05976018 | 24.14313597 |
| O | 26.54102591 | 17.06885369 | 12.53136084 |
| H | 26.4373976  | 17.03325723 | 13.49553253 |

|   |             |             |             |
|---|-------------|-------------|-------------|
| H | 25.6637909  | 17.23396131 | 12.17702832 |
| O | 19.71493054 | 21.52770041 | 13.65758031 |
| H | 20.06422465 | 21.62199365 | 14.51860309 |
| H | 20.36077634 | 21.89846627 | 13.06027556 |
| O | 16.63665823 | 10.08020912 | 22.18672634 |
| H | 17.31265524 | 10.46009771 | 21.62230497 |
| H | 16.69557378 | 10.67968909 | 22.91356423 |
| O | 15.4032689  | 14.97797048 | 25.46486288 |
| H | 15.3412437  | 15.87638088 | 25.0955521  |
| H | 15.05628632 | 14.56347141 | 24.6717462  |
| O | 13.89569208 | 12.3937151  | 21.50089863 |
| H | 13.21622792 | 12.69583542 | 20.90879598 |
| H | 13.92981442 | 11.45773733 | 21.34399266 |
| O | 16.68609305 | 16.43598667 | 27.76533181 |
| H | 16.40122539 | 15.55803913 | 27.45694095 |
| H | 15.87454279 | 16.92772257 | 27.94475582 |
| O | 20.69776516 | 17.54214441 | 25.75729744 |
| H | 20.8075923  | 18.29709248 | 25.14750738 |
| H | 19.77876883 | 17.66161103 | 26.02917167 |
| O | 14.64216865 | 18.27128765 | 26.85624433 |
| H | 15.1572313  | 19.03485067 | 27.13087799 |
| H | 14.84332232 | 18.18574493 | 25.91536341 |
| O | 19.06292504 | 13.47623742 | 16.90728785 |
| H | 19.27067963 | 12.58363417 | 17.18474434 |
| H | 18.19455172 | 13.29188824 | 16.55860089 |
| O | 14.76362159 | 18.05662106 | 19.92156302 |
| H | 14.48042017 | 19.00295919 | 19.95849309 |
| H | 14.43129653 | 17.84093047 | 20.80503026 |
| O | 22.49530419 | 16.07631002 | 27.30237171 |
| H | 23.14454548 | 16.3888746  | 26.68139862 |
| H | 21.7235078  | 16.35340276 | 26.79104657 |
| O | 17.47946044 | 23.40517547 | 25.38355097 |
| H | 16.58440633 | 23.2305845  | 25.7074843  |
| H | 17.90094335 | 22.60580746 | 25.75151328 |
| O | 15.72785587 | 15.23066492 | 19.66264029 |
| H | 15.50366754 | 16.18763142 | 19.81565109 |
| H | 16.68502143 | 15.25688609 | 19.73786414 |
| O | 22.71389317 | 14.19669695 | 23.43246996 |
| H | 21.77194152 | 14.0106508  | 23.34082708 |
| H | 22.93883975 | 14.13158001 | 22.47698514 |
| O | 18.40315499 | 14.87664535 | 26.54493535 |
| H | 17.53115905 | 14.89803898 | 26.1809807  |
| H | 18.38263398 | 15.7005588  | 27.04645538 |
| O | 16.25223427 | 18.50658958 | 17.65632003 |
| H | 16.6573321  | 19.27835161 | 18.09614273 |
| H | 15.529675   | 18.32218758 | 18.25757477 |
| O | 17.73253023 | 12.47895622 | 22.77095582 |



|   |             |             |             |
|---|-------------|-------------|-------------|
| H | 18.46579493 | 12.84769938 | 23.26405824 |
| H | 16.94434316 | 12.78876554 | 23.24535686 |
| O | 15.73279259 | 20.6748966  | 27.14887382 |
| H | 16.67465259 | 20.78211873 | 27.10191628 |
| H | 15.47600727 | 21.3597496  | 26.53965943 |
| O | 21.9035445  | 22.01482976 | 15.76622599 |
| H | 22.130963   | 22.94100632 | 15.87174653 |
| H | 22.240538   | 21.72897772 | 14.88470577 |
| O | 22.7573407  | 18.57706816 | 12.98803121 |
| H | 23.04764556 | 17.67288009 | 13.14123691 |
| H | 22.00000578 | 18.45976674 | 13.55898948 |
| O | 20.29113362 | 17.45612778 | 14.11194992 |
| H | 19.58779629 | 17.14157892 | 14.68652511 |
| H | 19.76358582 | 17.54168304 | 13.30812845 |
| O | 26.12714656 | 16.76165744 | 15.35006712 |
| H | 26.38183406 | 17.02996332 | 16.2351654  |
| H | 25.47427775 | 16.14416821 | 15.63975802 |
| O | 18.70815339 | 15.24010028 | 19.07860623 |
| H | 18.74395648 | 16.21686712 | 19.07336969 |
| H | 18.79066026 | 14.97487634 | 18.16569922 |
| O | 13.15579525 | 10.06379969 | 25.65921137 |
| H | 13.28563052 | 10.02305858 | 26.60022613 |
| H | 13.04363562 | 11.01582263 | 25.48907041 |
| O | 15.05703262 | 14.48133116 | 22.81546685 |
| H | 14.95240257 | 13.56227209 | 22.48875717 |
| H | 14.98583535 | 14.91712734 | 21.9876846  |
| O | 13.35239907 | 12.89633095 | 25.73903757 |
| H | 12.67510509 | 13.59331056 | 25.73185644 |
| H | 14.12695527 | 13.47126661 | 25.89014688 |
| O | 21.11766417 | 32.21470289 | 17.71558479 |
| H | 22.00895923 | 32.15769644 | 17.38880979 |
| H | 21.01410813 | 33.13557306 | 17.92892915 |

**Table S22. photoactive yellow protein (PYP) + MM waters**

| <b>Method</b>   | <b>Time(s)</b> | <b>Iterations</b> | <b>E (eV)</b> | <b>f</b>   |
|-----------------|----------------|-------------------|---------------|------------|
| <b>CIS</b>      | <b>4266.1</b>  | <b>9</b>          | <b>3.69</b>   | <b>1.6</b> |
| <b>TD-BLYP</b>  | <b>-</b>       | <b>-</b>          | <b>-</b>      | <b>-</b>   |
| <b>TD-B3LYP</b> | <b>4991.6</b>  | <b>11</b>         | <b>3.02</b>   | <b>0.0</b> |

|   |        |        |        |
|---|--------|--------|--------|
| N | 29.159 | 14.358 | 43.703 |
| H | 28.468 | 14.167 | 44.415 |
| H | 29.986 | 14.488 | 44.268 |
| H | 29.207 | 13.591 | 43.047 |
| C | 28.75  | 15.516 | 42.872 |
| H | 29.439 | 15.746 | 42.06  |
| C | 27.325 | 15.328 | 42.242 |
| H | 26.515 | 15.639 | 42.902 |
| H | 27.316 | 16.052 | 41.427 |
| C | 26.988 | 14.024 | 41.609 |
| H | 27.122 | 13.255 | 42.369 |
| H | 25.97  | 13.988 | 41.218 |
| S | 28.012 | 13.489 | 40.169 |
| C | 27.207 | 14.598 | 39.028 |
| H | 27.351 | 15.599 | 39.436 |
| H | 27.785 | 14.567 | 38.104 |
| H | 26.176 | 14.288 | 38.863 |
| C | 28.721 | 16.783 | 43.684 |
| O | 28.703 | 16.756 | 44.919 |
| N | 28.793 | 17.961 | 43.118 |
| H | 28.965 | 18.01  | 42.124 |
| C | 28.651 | 19.305 | 43.742 |
| H | 28.957 | 19.128 | 44.774 |
| C | 29.586 | 20.345 | 43.069 |
| H | 29.408 | 20.109 | 42.02  |
| H | 29.221 | 21.354 | 43.263 |
| C | 31.084 | 20.241 | 43.392 |
| H | 31.366 | 19.283 | 42.955 |
| H | 31.664 | 20.946 | 42.795 |
| C | 31.423 | 20.119 | 44.886 |
| O | 30.934 | 21.025 | 45.515 |
| O | 32.226 | 19.245 | 45.409 |
| C | 27.22  | 19.726 | 43.679 |
| O | 26.574 | 19.53  | 42.678 |
| N | 26.675 | 20.28  | 44.808 |
| H | 27.285 | 20.459 | 45.594 |
| C | 25.21  | 20.581 | 44.839 |
| H | 24.767 | 20.016 | 44.019 |
| C | 24.546 | 19.988 | 46.119 |
| H | 25.131 | 20.24  | 47.004 |
| H | 23.524 | 20.334 | 46.271 |

|   |        |        |        |
|---|--------|--------|--------|
| C | 24.641 | 18.452 | 46.187 |
| N | 23.831 | 17.531 | 45.413 |
| C | 24.45  | 16.336 | 45.518 |
| H | 24.189 | 15.433 | 44.986 |
| N | 25.627 | 16.407 | 46.226 |
| H | 26.239 | 15.615 | 46.363 |
| C | 25.74  | 17.708 | 46.658 |
| H | 26.626 | 18.164 | 47.075 |
| C | 24.877 | 22.028 | 44.488 |
| O | 24.173 | 22.631 | 45.284 |
| N | 25.327 | 22.537 | 43.379 |
| H | 25.6   | 21.816 | 42.727 |
| C | 24.947 | 23.874 | 42.786 |
| H | 24.818 | 24.536 | 43.642 |
| C | 26.171 | 24.411 | 41.956 |
| H | 26.366 | 23.779 | 41.09  |
| C | 25.91  | 25.868 | 41.509 |
| H | 25.458 | 25.87  | 40.517 |
| H | 25.191 | 26.343 | 42.177 |
| H | 26.885 | 26.352 | 41.551 |
| C | 27.489 | 24.379 | 42.718 |
| H | 27.733 | 23.432 | 43.198 |
| H | 28.319 | 24.474 | 42.018 |
| H | 27.458 | 25.142 | 43.496 |
| C | 23.672 | 23.702 | 41.927 |
| O | 23.386 | 22.691 | 41.247 |
| N | 22.844 | 24.759 | 41.95  |
| H | 23.08  | 25.482 | 42.615 |
| C | 21.71  | 24.932 | 41.017 |
| H | 21.359 | 23.969 | 40.647 |
| C | 20.537 | 25.578 | 41.819 |
| H | 20.804 | 26.571 | 42.181 |
| H | 19.597 | 25.599 | 41.267 |
| H | 20.3   | 24.913 | 42.649 |
| C | 22.152 | 25.8   | 39.81  |
| O | 23.091 | 26.629 | 39.837 |
| N | 21.575 | 25.653 | 38.622 |
| H | 20.755 | 25.077 | 38.505 |
| C | 22.036 | 26.134 | 37.344 |
| H | 23.125 | 26.082 | 37.381 |
| C | 21.469 | 25.268 | 36.222 |
| H | 21.691 | 24.247 | 36.533 |
| H | 20.38  | 25.215 | 36.257 |
| C | 21.943 | 25.579 | 34.802 |
| C | 21.349 | 26.543 | 33.968 |
| H | 20.629 | 27.191 | 34.445 |
| C | 21.836 | 26.811 | 32.698 |

|   |        |        |        |
|---|--------|--------|--------|
| H | 21.37  | 27.663 | 32.226 |
| C | 22.836 | 26.029 | 32.162 |
| H | 23.206 | 26.173 | 31.157 |
| C | 23.434 | 25.003 | 32.918 |
| H | 24.176 | 24.338 | 32.502 |
| C | 23.001 | 24.796 | 34.266 |
| H | 23.553 | 24.107 | 34.888 |
| C | 21.64  | 27.642 | 37.202 |
| O | 20.598 | 28.106 | 37.498 |
| N | 22.701 | 28.388 | 36.872 |
| H | 23.599 | 27.992 | 36.635 |
| C | 22.639 | 29.802 | 36.805 |
| H | 23.657 | 30.098 | 36.55  |
| H | 21.994 | 30.09  | 35.975 |
| C | 22.195 | 30.592 | 37.967 |
| O | 21.638 | 31.671 | 37.876 |
| N | 22.428 | 29.993 | 39.191 |
| H | 22.62  | 29.001 | 39.163 |
| C | 21.997 | 30.587 | 40.42  |
| H | 20.941 | 30.85  | 40.358 |
| C | 22.201 | 29.596 | 41.59  |
| H | 22.113 | 30.132 | 42.535 |
| H | 21.356 | 28.91  | 41.527 |
| O | 23.376 | 28.842 | 41.539 |
| H | 23.246 | 28.164 | 40.872 |
| C | 22.619 | 31.998 | 40.675 |
| O | 23.72  | 32.359 | 40.279 |
| N | 21.931 | 32.894 | 41.451 |
| H | 20.97  | 32.675 | 41.674 |
| C | 22.333 | 34.324 | 41.64  |
| H | 22.366 | 34.846 | 40.684 |
| C | 21.285 | 35.056 | 42.402 |
| H | 21.247 | 34.524 | 43.353 |
| H | 21.582 | 36.085 | 42.605 |
| C | 19.928 | 35.241 | 41.683 |
| H | 20.074 | 35.747 | 40.729 |
| H | 19.514 | 34.277 | 41.386 |
| C | 18.977 | 35.847 | 42.654 |
| O | 18.947 | 37.089 | 42.599 |
| O | 18.324 | 35.101 | 43.458 |
| C | 23.729 | 34.508 | 42.34  |
| O | 24.305 | 35.545 | 42.125 |
| N | 24.214 | 33.594 | 43.159 |
| H | 23.747 | 32.739 | 43.428 |
| C | 25.625 | 33.628 | 43.566 |
| H | 26.024 | 34.606 | 43.298 |
| C | 25.664 | 33.414 | 45.149 |

|   |        |        |        |
|---|--------|--------|--------|
| H | 26.667 | 33.523 | 45.56  |
| H | 25.17  | 34.276 | 45.597 |
| C | 25.068 | 32.027 | 45.597 |
| O | 24.578 | 31.26  | 44.742 |
| O | 25.088 | 31.727 | 46.792 |
| C | 26.584 | 32.689 | 42.88  |
| O | 27.664 | 32.493 | 43.437 |
| N | 26.265 | 32.058 | 41.776 |
| H | 25.405 | 32.289 | 41.3   |
| C | 27.09  | 30.993 | 41.187 |
| H | 27.085 | 30.118 | 41.836 |
| C | 26.393 | 30.46  | 39.907 |
| H | 25.384 | 30.387 | 40.314 |
| C | 26.351 | 31.492 | 38.817 |
| H | 27.32  | 31.552 | 38.322 |
| H | 25.534 | 31.115 | 38.204 |
| H | 26.11  | 32.459 | 39.26  |
| C | 26.852 | 29.066 | 39.486 |
| H | 27.807 | 29.284 | 39.009 |
| H | 26.953 | 28.479 | 40.399 |
| C | 25.887 | 28.411 | 38.525 |
| H | 25.673 | 29.063 | 37.679 |
| H | 26.298 | 27.504 | 38.083 |
| H | 24.919 | 28.123 | 38.936 |
| C | 28.619 | 31.306 | 41.002 |
| O | 29.449 | 30.501 | 41.285 |
| N | 28.97  | 32.52  | 40.679 |
| H | 28.28  | 33.236 | 40.504 |
| C | 30.389 | 32.978 | 40.537 |
| H | 30.994 | 32.349 | 39.884 |
| C | 30.552 | 34.33  | 39.905 |
| H | 31.578 | 34.693 | 39.957 |
| H | 30.16  | 34.254 | 38.891 |
| C | 29.747 | 35.578 | 40.479 |
| H | 29.704 | 35.536 | 41.567 |
| H | 30.327 | 36.452 | 40.18  |
| C | 28.277 | 35.685 | 39.959 |
| O | 27.443 | 34.749 | 40.219 |
| O | 27.91  | 36.782 | 39.559 |
| C | 31.1   | 32.942 | 41.873 |
| O | 32.257 | 32.574 | 41.957 |
| N | 30.335 | 33.137 | 42.944 |
| H | 29.345 | 33.264 | 42.793 |
| C | 30.896 | 33.098 | 44.339 |
| H | 31.9   | 33.52  | 44.376 |
| C | 29.955 | 33.997 | 45.14  |
| H | 28.931 | 33.76  | 44.851 |

|   |        |        |        |
|---|--------|--------|--------|
| H | 30.089 | 33.74  | 46.191 |
| C | 30.156 | 35.494 | 45.047 |
| O | 29.468 | 36.096 | 44.224 |
| N | 31.234 | 36.014 | 45.612 |
| H | 31.548 | 36.942 | 45.367 |
| H | 31.8   | 35.466 | 46.243 |
| C | 30.994 | 31.687 | 44.765 |
| O | 32.048 | 31.217 | 45.206 |
| N | 29.925 | 30.907 | 44.582 |
| H | 29.074 | 31.337 | 44.251 |
| C | 29.982 | 29.4   | 44.876 |
| H | 30.246 | 29.31  | 45.93  |
| C | 28.593 | 28.779 | 44.553 |
| H | 28.576 | 28.889 | 43.469 |
| C | 28.379 | 27.326 | 44.97  |
| H | 28.939 | 26.548 | 44.453 |
| H | 28.534 | 27.26  | 46.047 |
| H | 27.336 | 27.141 | 44.711 |
| O | 27.569 | 29.579 | 45.141 |
| H | 26.785 | 29.36  | 44.632 |
| C | 31.075 | 28.672 | 44.075 |
| O | 31.724 | 27.824 | 44.679 |
| N | 31.354 | 29.086 | 42.814 |
| H | 30.573 | 29.582 | 42.409 |
| C | 32.383 | 28.494 | 41.997 |
| H | 32.56  | 27.448 | 42.25  |
| C | 31.873 | 28.435 | 40.53  |
| H | 31.381 | 29.396 | 40.376 |
| H | 32.594 | 28.476 | 39.714 |
| C | 31.049 | 27.172 | 40.213 |
| H | 31.704 | 26.317 | 40.376 |
| C | 29.86  | 26.893 | 41.147 |
| H | 30.059 | 26.818 | 42.216 |
| H | 29.161 | 27.713 | 40.983 |
| H | 29.466 | 25.928 | 40.829 |
| C | 30.559 | 27.121 | 38.784 |
| H | 31.406 | 27.251 | 38.11  |
| H | 30.109 | 26.155 | 38.554 |
| H | 29.849 | 27.917 | 38.56  |
| C | 33.768 | 29.124 | 42.152 |
| O | 34.723 | 28.398 | 41.824 |
| N | 33.976 | 30.235 | 42.802 |
| H | 33.175 | 30.741 | 43.151 |
| C | 35.292 | 30.836 | 42.999 |
| H | 35.776 | 30.858 | 42.022 |
| C | 35.129 | 32.27  | 43.47  |
| H | 36.072 | 32.68  | 43.829 |

|   |        |        |        |
|---|--------|--------|--------|
| H | 34.69  | 32.917 | 42.71  |
| H | 34.501 | 32.239 | 44.36  |
| C | 36.197 | 29.94  | 43.858 |
| O | 37.403 | 29.926 | 43.62  |
| N | 35.621 | 29.194 | 44.814 |
| H | 34.622 | 29.335 | 44.861 |
| C | 36.306 | 28.315 | 45.735 |
| H | 37.292 | 28.704 | 45.989 |
| C | 35.567 | 28.258 | 47.099 |
| H | 35.966 | 27.544 | 47.819 |
| H | 35.532 | 29.181 | 47.678 |
| C | 34.092 | 28.03  | 46.806 |
| H | 33.605 | 28.886 | 46.338 |
| H | 33.928 | 27.181 | 46.142 |
| C | 33.282 | 27.794 | 48.137 |
| H | 33.504 | 26.79  | 48.5   |
| H | 33.638 | 28.445 | 48.935 |
| C | 31.738 | 27.951 | 47.954 |
| H | 31.465 | 28.914 | 47.523 |
| H | 31.455 | 27.151 | 47.269 |
| N | 31.054 | 27.878 | 49.258 |
| H | 30.056 | 27.772 | 49.145 |
| H | 31.372 | 27.061 | 49.758 |
| H | 31.223 | 28.694 | 49.829 |
| C | 36.644 | 26.915 | 45.099 |
| O | 37.156 | 26.048 | 45.847 |
| N | 36.493 | 26.755 | 43.795 |
| H | 36.151 | 27.522 | 43.235 |
| C | 36.656 | 25.442 | 43.174 |
| H | 36.815 | 24.697 | 43.954 |
| C | 35.375 | 25.032 | 42.396 |
| H | 35.163 | 25.732 | 41.588 |
| H | 35.542 | 24.039 | 41.979 |
| C | 34.171 | 25.073 | 43.224 |
| H | 34.316 | 24.349 | 44.026 |
| H | 33.954 | 26.042 | 43.673 |
| S | 32.651 | 24.474 | 42.467 |
| C | 31.416 | 24.148 | 43.75  |
| H | 31.319 | 25.041 | 44.367 |
| H | 30.441 | 23.998 | 43.287 |
| H | 31.806 | 23.341 | 44.371 |
| C | 37.963 | 25.301 | 42.326 |
| O | 38.299 | 26.206 | 41.571 |
| N | 38.592 | 24.148 | 42.359 |
| H | 38.233 | 23.554 | 43.093 |
| C | 39.565 | 23.642 | 41.442 |
| H | 40.076 | 24.486 | 40.979 |

|   |        |        |        |
|---|--------|--------|--------|
| C | 40.69  | 22.91  | 42.166 |
| H | 41.289 | 23.56  | 42.805 |
| H | 40.245 | 22.075 | 42.706 |
| C | 41.713 | 22.363 | 41.132 |
| O | 41.529 | 21.296 | 40.541 |
| O | 42.542 | 23.189 | 40.666 |
| C | 38.927 | 22.829 | 40.284 |
| O | 37.822 | 22.354 | 40.377 |
| N | 39.512 | 22.696 | 39.077 |
| H | 40.45  | 23.046 | 38.946 |
| C | 39.024 | 21.9   | 37.982 |
| H | 38.078 | 22.34  | 37.668 |
| C | 39.976 | 21.902 | 36.768 |
| H | 39.573 | 21.256 | 35.987 |
| H | 40.101 | 22.904 | 36.358 |
| C | 41.378 | 21.42  | 37.066 |
| O | 41.477 | 20.263 | 37.411 |
| O | 42.276 | 22.26  | 37.155 |
| C | 38.597 | 20.469 | 38.38  |
| O | 37.52  | 20.016 | 38.075 |
| N | 39.346 | 19.851 | 39.229 |
| H | 40.229 | 20.293 | 39.442 |
| C | 38.928 | 18.598 | 39.773 |
| H | 38.917 | 17.927 | 38.914 |
| H | 39.626 | 18.203 | 40.512 |
| C | 37.633 | 18.618 | 40.501 |
| O | 36.957 | 17.566 | 40.638 |
| N | 37.194 | 19.769 | 40.992 |
| H | 37.733 | 20.573 | 40.703 |
| C | 35.885 | 20.077 | 41.636 |
| H | 35.617 | 19.126 | 42.096 |
| C | 36.069 | 21.062 | 42.804 |
| H | 36.894 | 20.622 | 43.363 |
| H | 36.295 | 22.061 | 42.431 |
| C | 34.811 | 21.03  | 43.741 |
| H | 34.028 | 21.545 | 43.184 |
| H | 34.498 | 19.992 | 43.853 |
| C | 35.017 | 21.638 | 45.074 |
| O | 35.942 | 22.363 | 45.302 |
| N | 34.125 | 21.38  | 46.062 |
| H | 34.325 | 21.837 | 46.94  |
| H | 33.323 | 20.794 | 45.879 |
| C | 34.836 | 20.509 | 40.536 |
| O | 33.716 | 19.988 | 40.555 |
| N | 35.19  | 21.262 | 39.515 |
| H | 36.183 | 21.445 | 39.474 |
| C | 34.283 | 21.648 | 38.396 |



|   |        |        |        |
|---|--------|--------|--------|
| H | 33.393 | 21.951 | 38.946 |
| C | 34.882 | 22.758 | 37.609 |
| H | 35.825 | 22.491 | 37.132 |
| H | 34.122 | 22.988 | 36.863 |
| C | 35.204 | 24.125 | 38.399 |
| H | 35.859 | 23.903 | 39.24  |
| C | 35.89  | 25.15  | 37.385 |
| H | 35.199 | 25.56  | 36.649 |
| H | 36.319 | 25.898 | 38.053 |
| H | 36.726 | 24.624 | 36.924 |
| C | 33.938 | 24.74  | 38.902 |
| H | 33.524 | 24.131 | 39.705 |
| H | 34.219 | 25.727 | 39.271 |
| H | 33.256 | 25.001 | 38.093 |
| C | 33.903 | 20.386 | 37.588 |
| O | 32.803 | 20.32  | 37.068 |
| N | 34.777 | 19.408 | 37.52  |
| H | 35.716 | 19.674 | 37.78  |
| C | 34.404 | 18.166 | 36.917 |
| H | 34.001 | 18.326 | 35.917 |
| C | 35.766 | 17.297 | 36.8   |
| H | 36.254 | 17.203 | 37.77  |
| H | 35.45  | 16.278 | 36.579 |
| C | 36.754 | 17.762 | 35.812 |
| O | 36.252 | 18.374 | 34.836 |
| O | 38.012 | 17.427 | 35.831 |
| C | 33.268 | 17.326 | 37.545 |
| O | 32.841 | 16.253 | 37.106 |
| N | 32.8   | 17.737 | 38.75  |
| H | 33.13  | 18.607 | 39.141 |
| C | 31.812 | 17.127 | 39.583 |
| H | 31.76  | 16.049 | 39.434 |
| H | 32.084 | 17.288 | 40.626 |
| C | 30.371 | 17.786 | 39.499 |
| O | 29.508 | 17.305 | 40.205 |
| N | 30.165 | 18.847 | 38.712 |
| H | 30.92  | 19.099 | 38.09  |
| C | 28.837 | 19.419 | 38.55  |
| H | 28.318 | 19.62  | 39.487 |
| C | 28.989 | 20.742 | 37.747 |
| H | 29.413 | 20.622 | 36.75  |
| H | 28.002 | 21.162 | 37.548 |
| C | 29.911 | 21.833 | 38.391 |
| H | 30.817 | 21.37  | 38.782 |
| C | 30.292 | 22.843 | 37.286 |
| H | 30.429 | 23.835 | 37.717 |
| H | 31.168 | 22.469 | 36.755 |

|   |        |        |        |
|---|--------|--------|--------|
| H | 29.525 | 22.988 | 36.525 |
| C | 29.34  | 22.502 | 39.592 |
| H | 29.004 | 21.742 | 40.297 |
| H | 30.098 | 23.127 | 40.063 |
| H | 28.378 | 22.931 | 39.31  |
| C | 27.859 | 18.49  | 37.879 |
| O | 28.337 | 17.462 | 37.289 |
| N | 26.535 | 18.648 | 37.947 |
| H | 26.223 | 19.438 | 38.493 |
| C | 25.592 | 17.97  | 37.116 |
| H | 25.986 | 16.973 | 36.919 |
| C | 24.377 | 17.648 | 38.021 |
| H | 24.619 | 16.921 | 38.797 |
| H | 24.04  | 18.583 | 38.468 |
| H | 23.626 | 17.229 | 37.35  |
| C | 25.194 | 18.642 | 35.685 |
| O | 24.265 | 18.163 | 35.058 |
| N | 25.95  | 19.595 | 35.348 |
| H | 26.672 | 19.784 | 36.029 |
| C | 25.904 | 20.382 | 34.126 |
| H | 25.381 | 19.795 | 33.371 |
| C | 24.917 | 21.551 | 34.397 |
| H | 24.914 | 22.275 | 33.583 |
| H | 23.906 | 21.194 | 34.2   |
| C | 25.091 | 22.186 | 35.722 |
| C | 26.107 | 23.159 | 35.905 |
| H | 26.751 | 23.378 | 35.066 |
| C | 26.245 | 23.853 | 37.153 |
| H | 26.974 | 24.641 | 37.279 |
| C | 25.431 | 23.509 | 38.203 |
| H | 25.591 | 23.958 | 39.172 |
| C | 24.525 | 22.445 | 38.072 |
| H | 23.916 | 22.102 | 38.895 |
| C | 24.314 | 21.792 | 36.821 |
| H | 23.53  | 21.05  | 36.791 |
| C | 27.327 | 20.888 | 33.68  |
| O | 28.224 | 20.973 | 34.54  |
| N | 27.494 | 21.285 | 32.42  |
| H | 26.712 | 21.264 | 31.782 |
| C | 28.74  | 21.735 | 31.921 |
| H | 29.573 | 21.145 | 32.304 |
| H | 28.637 | 21.724 | 30.836 |
| C | 29.067 | 23.2   | 32.435 |
| O | 28.165 | 24.025 | 32.604 |
| N | 30.413 | 23.498 | 32.542 |
| H | 31.065 | 22.778 | 32.267 |
| C | 30.926 | 24.752 | 33.028 |

|   |        |        |        |
|---|--------|--------|--------|
| H | 30.161 | 25.528 | 33.032 |
| C | 31.329 | 24.535 | 34.522 |
| H | 31.719 | 23.52  | 34.597 |
| H | 32.063 | 25.248 | 34.898 |
| H | 30.44  | 24.589 | 35.15  |
| C | 32.16  | 25.226 | 32.268 |
| O | 33.14  | 24.413 | 32.051 |
| N | 32.238 | 26.491 | 31.853 |
| H | 31.423 | 27.061 | 32.031 |
| C | 33.429 | 27.057 | 31.186 |
| H | 34.312 | 26.428 | 31.301 |
| C | 33.341 | 27.093 | 29.661 |
| H | 32.596 | 27.818 | 29.335 |
| C | 34.742 | 27.424 | 28.971 |
| H | 35.33  | 26.51  | 28.889 |
| H | 34.647 | 27.975 | 28.036 |
| H | 35.394 | 27.962 | 29.66  |
| C | 32.852 | 25.737 | 29.101 |
| H | 33.455 | 24.895 | 29.442 |
| H | 31.855 | 25.554 | 29.502 |
| C | 32.642 | 25.611 | 27.599 |
| H | 32.041 | 26.472 | 27.309 |
| H | 33.561 | 25.832 | 27.056 |
| H | 32.062 | 24.736 | 27.306 |
| C | 33.778 | 28.442 | 31.693 |
| O | 32.841 | 29.258 | 31.827 |
| N | 35.014 | 28.741 | 32.103 |
| H | 35.69  | 27.991 | 32.105 |
| C | 35.41  | 30.066 | 32.492 |
| H | 34.533 | 30.693 | 32.653 |
| C | 36.103 | 29.997 | 33.866 |
| H | 35.535 | 29.301 | 34.483 |
| H | 37.118 | 29.61  | 33.778 |
| C | 36.04  | 31.332 | 34.679 |
| H | 36.151 | 32.235 | 34.077 |
| H | 35.031 | 31.483 | 35.062 |
| C | 37.068 | 31.326 | 35.828 |
| O | 38.02  | 30.621 | 35.843 |
| N | 36.768 | 32.031 | 36.887 |
| H | 37.331 | 31.809 | 37.696 |
| H | 36.027 | 32.708 | 37     |
| C | 36.368 | 30.593 | 31.433 |
| O | 37.067 | 29.823 | 30.781 |
| N | 36.413 | 31.929 | 31.227 |
| H | 35.939 | 32.545 | 31.873 |
| C | 36.934 | 32.616 | 29.93  |
| H | 37.632 | 31.984 | 29.38  |

|   |        |        |        |
|---|--------|--------|--------|
| C | 35.809 | 32.995 | 28.944 |
| H | 35.078 | 33.692 | 29.353 |
| H | 36.399 | 33.476 | 28.163 |
| C | 34.953 | 31.792 | 28.503 |
| H | 34.453 | 31.257 | 29.31  |
| C | 33.738 | 32.184 | 27.661 |
| H | 33.326 | 31.263 | 27.249 |
| H | 33.011 | 32.793 | 28.199 |
| H | 34.193 | 32.828 | 26.909 |
| C | 35.752 | 30.757 | 27.693 |
| H | 36.257 | 31.301 | 26.894 |
| H | 36.447 | 30.289 | 28.39  |
| H | 35.082 | 30.011 | 27.266 |
| C | 37.737 | 33.871 | 30.342 |
| O | 37.224 | 34.754 | 31.087 |
| N | 38.931 | 34.038 | 29.712 |
| H | 39.192 | 33.317 | 29.055 |
| C | 39.427 | 35.369 | 29.372 |
| H | 39.418 | 36.084 | 30.195 |
| C | 40.855 | 35.208 | 28.828 |
| H | 41.52  | 34.992 | 29.664 |
| H | 40.798 | 34.344 | 28.166 |
| C | 41.43  | 36.482 | 28.03  |
| O | 42.137 | 36.153 | 27.101 |
| O | 41.139 | 37.717 | 28.328 |
| C | 38.432 | 36.03  | 28.347 |
| O | 37.847 | 35.361 | 27.479 |
| N | 38.293 | 37.335 | 28.38  |
| H | 38.711 | 37.904 | 29.103 |
| C | 37.346 | 37.963 | 27.482 |
| H | 36.466 | 37.349 | 27.291 |
| H | 37.022 | 38.94  | 27.843 |
| C | 37.826 | 38.213 | 26.045 |
| O | 37.037 | 38.415 | 25.099 |
| N | 39.14  | 38.042 | 25.82  |
| H | 39.634 | 37.614 | 26.589 |
| C | 39.719 | 37.971 | 24.426 |
| H | 39.042 | 38.568 | 23.816 |
| C | 41.197 | 38.483 | 24.339 |
| H | 41.813 | 37.889 | 25.015 |
| H | 41.687 | 38.358 | 23.373 |
| C | 41.192 | 39.913 | 24.735 |
| O | 40.584 | 40.702 | 23.996 |
| O | 42.022 | 40.328 | 25.601 |
| C | 39.426 | 36.572 | 23.811 |
| O | 39.482 | 36.463 | 22.578 |
| N | 39.042 | 35.572 | 24.599 |

|   |        |        |        |
|---|--------|--------|--------|
| H | 38.961 | 35.612 | 25.605 |
| C | 38.504 | 34.262 | 24.132 |
| H | 37.424 | 34.155 | 24.23  |
| H | 38.653 | 34.308 | 23.053 |
| C | 39.069 | 33.047 | 24.738 |
| O | 38.539 | 31.969 | 24.55  |
| N | 40.121 | 33.178 | 25.569 |
| H | 40.199 | 34.019 | 26.123 |
| C | 40.834 | 32.029 | 26.001 |
| H | 40.965 | 31.322 | 25.182 |
| C | 42.27  | 32.43  | 26.249 |
| H | 42.332 | 33.079 | 27.123 |
| H | 42.941 | 31.573 | 26.308 |
| C | 42.813 | 33.167 | 25.028 |
| O | 43.341 | 32.559 | 24.061 |
| N | 42.758 | 34.477 | 25.078 |
| H | 43.002 | 35.094 | 24.316 |
| H | 42.425 | 34.861 | 25.95  |
| C | 40.208 | 31.24  | 27.183 |
| O | 39.799 | 31.788 | 28.165 |
| N | 40.127 | 29.968 | 27.011 |
| H | 40.543 | 29.513 | 26.211 |
| C | 39.444 | 29.059 | 27.995 |
| H | 38.469 | 29.39  | 28.353 |
| C | 39.205 | 27.705 | 27.414 |
| H | 40.1   | 27.233 | 27.008 |
| C | 38.597 | 26.729 | 28.453 |
| H | 39.327 | 26.546 | 29.242 |
| H | 37.666 | 27.088 | 28.891 |
| H | 38.436 | 25.72  | 28.074 |
| C | 38.196 | 27.844 | 26.207 |
| H | 37.182 | 27.928 | 26.596 |
| H | 38.374 | 28.789 | 25.694 |
| C | 38.292 | 26.693 | 25.199 |
| H | 37.368 | 26.687 | 24.62  |
| H | 39.092 | 26.866 | 24.48  |
| H | 38.351 | 25.729 | 25.703 |
| C | 40.388 | 28.953 | 29.206 |
| O | 41.415 | 28.338 | 29.103 |
| N | 40.004 | 29.491 | 30.353 |
| H | 39.114 | 29.967 | 30.334 |
| C | 40.64  | 29.424 | 31.74  |
| H | 41.72  | 29.57  | 31.768 |
| C | 40.121 | 30.559 | 32.688 |
| H | 39.127 | 30.378 | 33.097 |
| H | 40.774 | 30.501 | 33.559 |
| C | 39.963 | 31.954 | 32.11  |

|   |        |        |        |
|---|--------|--------|--------|
| H | 39.309 | 31.956 | 31.238 |
| C | 39.357 | 32.969 | 33.12  |
| H | 39.651 | 33.988 | 32.867 |
| H | 38.269 | 32.923 | 33.061 |
| H | 39.712 | 32.781 | 34.133 |
| C | 41.36  | 32.44  | 31.754 |
| H | 41.665 | 31.769 | 30.951 |
| H | 41.428 | 33.415 | 31.271 |
| H | 42.096 | 32.295 | 32.544 |
| C | 40.231 | 28.109 | 32.451 |
| O | 41.13  | 27.476 | 32.945 |
| N | 38.982 | 27.628 | 32.259 |
| H | 38.306 | 28.224 | 31.802 |
| C | 38.499 | 26.391 | 32.893 |
| H | 39.321 | 25.676 | 32.902 |
| C | 37.886 | 26.695 | 34.263 |
| H | 37.023 | 27.346 | 34.124 |
| H | 37.441 | 25.772 | 34.637 |
| C | 38.782 | 27.305 | 35.349 |
| H | 39.297 | 28.182 | 34.958 |
| H | 38.268 | 27.546 | 36.279 |
| C | 39.913 | 26.386 | 35.887 |
| O | 40.21  | 25.343 | 35.301 |
| N | 40.454 | 26.616 | 37.076 |
| H | 40.294 | 27.518 | 37.501 |
| H | 41.258 | 26.1   | 37.406 |
| C | 37.458 | 25.693 | 32.01  |
| O | 36.625 | 26.374 | 31.384 |
| N | 37.441 | 24.34  | 31.909 |
| H | 37.965 | 23.764 | 32.552 |
| C | 36.394 | 23.597 | 31.238 |
| H | 35.529 | 24.255 | 31.156 |
| C | 36.918 | 23.425 | 29.784 |
| H | 37.288 | 24.345 | 29.33  |
| H | 37.768 | 22.747 | 29.853 |
| C | 36.005 | 22.828 | 28.77  |
| C | 35.833 | 21.451 | 28.796 |
| H | 36.421 | 20.8   | 29.427 |
| C | 35.105 | 20.837 | 27.76  |
| H | 34.972 | 19.774 | 27.896 |
| C | 34.55  | 21.613 | 26.746 |
| O | 33.916 | 20.973 | 25.712 |
| H | 33.327 | 21.561 | 25.233 |
| C | 34.708 | 22.976 | 26.728 |
| H | 34.304 | 23.532 | 25.896 |
| C | 35.38  | 23.573 | 27.809 |
| H | 35.671 | 24.611 | 27.752 |

|   |        |        |        |
|---|--------|--------|--------|
| C | 36.226 | 22.227 | 31.92  |
| O | 37.229 | 21.643 | 32.382 |
| N | 35.031 | 21.647 | 31.885 |
| H | 34.345 | 22.21  | 31.403 |
| C | 34.663 | 20.537 | 32.722 |
| H | 35.524 | 20.259 | 33.331 |
| C | 33.755 | 20.965 | 33.898 |
| H | 33.993 | 20.334 | 34.755 |
| H | 33.955 | 22.01  | 34.132 |
| C | 32.304 | 20.812 | 33.515 |
| O | 31.864 | 21.027 | 32.388 |
| N | 31.496 | 20.901 | 34.576 |
| H | 30.538 | 21.136 | 34.355 |
| H | 31.875 | 20.799 | 35.506 |
| C | 34.375 | 19.267 | 31.911 |
| O | 33.819 | 19.316 | 30.78  |
| N | 34.591 | 18.05  | 32.446 |
| H | 35.03  | 17.938 | 33.349 |
| C | 34.146 | 16.813 | 31.751 |
| H | 34.491 | 16.942 | 30.725 |
| C | 34.826 | 15.501 | 32.292 |
| H | 35.862 | 15.369 | 31.98  |
| H | 34.908 | 15.645 | 33.369 |
| H | 34.258 | 14.629 | 31.968 |
| C | 32.556 | 16.646 | 31.522 |
| O | 32.129 | 15.826 | 30.7   |
| N | 31.797 | 17.539 | 32.176 |
| H | 32.195 | 18.188 | 32.84  |
| C | 30.346 | 17.394 | 32.245 |
| H | 30.129 | 16.337 | 32.095 |
| C | 29.732 | 17.817 | 33.558 |
| H | 30.291 | 17.357 | 34.373 |
| H | 29.811 | 18.896 | 33.691 |
| H | 28.706 | 17.487 | 33.723 |
| C | 29.657 | 18.005 | 30.963 |
| O | 28.464 | 18.233 | 30.92  |
| N | 30.477 | 18.407 | 29.962 |
| H | 31.431 | 18.592 | 30.239 |
| C | 29.955 | 18.859 | 28.594 |
| H | 28.922 | 18.533 | 28.473 |
| C | 30.084 | 20.381 | 28.5   |
| H | 29.496 | 20.781 | 29.326 |
| H | 29.608 | 20.724 | 27.581 |
| C | 31.479 | 20.958 | 28.604 |
| H | 32.197 | 20.176 | 28.852 |
| H | 31.87  | 21.272 | 27.636 |
| C | 31.687 | 22.103 | 29.521 |

|   |        |        |        |
|---|--------|--------|--------|
| O | 30.891 | 23.001 | 29.876 |
| O | 32.903 | 22.234 | 30.058 |
| H | 32.867 | 23.059 | 30.548 |
| C | 30.657 | 18.163 | 27.402 |
| O | 30.007 | 18.08  | 26.381 |
| N | 31.881 | 17.606 | 27.587 |
| H | 32.282 | 17.754 | 28.502 |
| C | 32.718 | 16.861 | 26.607 |
| H | 33.182 | 17.664 | 26.034 |
| H | 33.479 | 16.277 | 27.124 |
| C | 31.985 | 15.823 | 25.763 |
| O | 32.371 | 15.688 | 24.595 |
| N | 31.01  | 15.134 | 26.341 |
| H | 30.765 | 15.473 | 27.261 |
| C | 30.195 | 14.139 | 25.688 |
| H | 30.934 | 13.546 | 25.15  |
| C | 29.399 | 13.347 | 26.762 |
| H | 28.484 | 13.848 | 27.079 |
| H | 29.094 | 12.459 | 26.208 |
| C | 30.21  | 12.97  | 28.051 |
| O | 30.786 | 11.891 | 28.128 |
| O | 30.221 | 13.856 | 28.978 |
| C | 29.199 | 14.671 | 24.669 |
| O | 28.967 | 14.043 | 23.604 |
| N | 28.578 | 15.849 | 24.974 |
| H | 28.882 | 16.348 | 25.798 |
| C | 27.59  | 16.49  | 24.12  |
| H | 26.759 | 15.834 | 23.86  |
| C | 26.971 | 17.714 | 24.811 |
| H | 27.768 | 18.43  | 25.011 |
| C | 25.826 | 18.317 | 23.899 |
| H | 26.197 | 18.459 | 22.884 |
| H | 25.019 | 17.627 | 23.651 |
| H | 25.343 | 19.209 | 24.299 |
| C | 26.351 | 17.457 | 26.195 |
| H | 25.421 | 16.901 | 26.312 |
| H | 27.109 | 16.837 | 26.674 |
| C | 26.2   | 18.769 | 27.132 |
| H | 25.403 | 19.365 | 26.688 |
| H | 25.875 | 18.441 | 28.12  |
| H | 27.138 | 19.323 | 27.163 |
| C | 28.323 | 16.905 | 22.803 |
| O | 27.839 | 16.684 | 21.708 |
| N | 29.453 | 17.635 | 22.859 |
| H | 29.889 | 17.91  | 23.728 |
| C | 30.091 | 18.178 | 21.613 |
| H | 29.405 | 18.321 | 20.778 |



|   |        |        |        |
|---|--------|--------|--------|
| C | 30.625 | 19.567 | 21.944 |
| H | 31.145 | 19.997 | 21.088 |
| C | 29.506 | 20.539 | 22.502 |
| H | 28.487 | 20.37  | 22.156 |
| H | 29.652 | 20.726 | 23.566 |
| H | 29.845 | 21.475 | 22.059 |
| O | 31.574 | 19.346 | 22.984 |
| H | 31.785 | 20.173 | 23.424 |
| C | 31.216 | 17.393 | 21.026 |
| O | 31.692 | 17.779 | 19.97  |
| N | 31.665 | 16.223 | 21.605 |
| H | 31.036 | 15.917 | 22.334 |
| C | 32.726 | 15.384 | 21.17  |
| H | 32.803 | 14.496 | 21.798 |
| H | 32.643 | 15.05  | 20.136 |
| C | 34.139 | 16.062 | 21.253 |
| O | 35.025 | 15.936 | 20.373 |
| N | 34.299 | 16.929 | 22.228 |
| H | 33.578 | 17.037 | 22.927 |
| C | 35.624 | 17.483 | 22.454 |
| H | 36.312 | 17.268 | 21.636 |
| C | 35.522 | 19.035 | 22.694 |
| H | 34.643 | 19.227 | 23.31  |
| H | 36.405 | 19.363 | 23.242 |
| C | 35.538 | 19.943 | 21.417 |
| H | 35.574 | 20.949 | 21.835 |
| H | 36.392 | 19.589 | 20.84  |
| C | 34.285 | 19.729 | 20.58  |
| H | 34.261 | 18.713 | 20.186 |
| H | 33.38  | 20.007 | 21.12  |
| N | 34.357 | 20.652 | 19.467 |
| H | 34.948 | 21.471 | 19.455 |
| C | 33.504 | 20.71  | 18.47  |
| N | 32.663 | 19.742 | 18.236 |
| H | 32.472 | 19.061 | 18.957 |
| H | 32.183 | 19.64  | 17.353 |
| N | 33.636 | 21.681 | 17.601 |
| H | 34.023 | 22.582 | 17.843 |
| H | 32.996 | 21.625 | 16.822 |
| C | 36.179 | 16.772 | 23.7   |
| O | 35.412 | 16.692 | 24.695 |
| N | 37.401 | 16.318 | 23.716 |
| H | 38.025 | 16.508 | 22.946 |
| C | 38.125 | 15.902 | 24.954 |
| H | 37.471 | 15.189 | 25.455 |
| C | 39.432 | 15.251 | 24.476 |
| H | 39.176 | 14.331 | 23.951 |

|   |        |        |        |
|---|--------|--------|--------|
| H | 40.027 | 15.914 | 23.847 |
| C | 40.393 | 14.832 | 25.612 |
| O | 41.394 | 14.222 | 25.258 |
| O | 40.131 | 14.94  | 26.796 |
| C | 38.376 | 17.085 | 25.953 |
| O | 39.126 | 18.038 | 25.626 |
| N | 37.802 | 17.005 | 27.195 |
| C | 37.121 | 15.818 | 27.727 |
| H | 37.632 | 14.86  | 27.638 |
| H | 36.161 | 15.753 | 27.215 |
| C | 36.844 | 15.97  | 29.186 |
| H | 37.702 | 15.747 | 29.82  |
| H | 35.929 | 15.501 | 29.546 |
| C | 36.697 | 17.492 | 29.26  |
| H | 36.996 | 17.757 | 30.275 |
| H | 35.688 | 17.719 | 28.918 |
| C | 37.723 | 18.007 | 28.204 |
| H | 37.26  | 18.869 | 27.724 |
| C | 39.015 | 18.433 | 28.825 |
| O | 39.109 | 19.46  | 29.435 |
| N | 40.094 | 17.63  | 28.723 |
| H | 39.95  | 16.693 | 28.374 |
| C | 41.495 | 17.964 | 29.06  |
| H | 41.525 | 18.667 | 29.892 |
| C | 42.127 | 16.743 | 29.793 |
| H | 42.2   | 15.821 | 29.215 |
| H | 43.173 | 17.002 | 29.953 |
| C | 41.472 | 16.414 | 31.158 |
| H | 40.385 | 16.394 | 31.091 |
| H | 41.823 | 15.423 | 31.445 |
| C | 41.832 | 17.469 | 32.232 |
| H | 42.892 | 17.559 | 32.467 |
| H | 41.489 | 18.47  | 31.97  |
| C | 41.034 | 17.184 | 33.558 |
| H | 41.374 | 16.187 | 33.837 |
| H | 41.293 | 17.968 | 34.27  |
| N | 39.505 | 17.258 | 33.304 |
| H | 39.23  | 16.389 | 32.869 |
| H | 38.998 | 17.303 | 34.176 |
| H | 39.259 | 18     | 32.665 |
| C | 42.361 | 18.412 | 27.903 |
| O | 43.602 | 18.583 | 28.131 |
| N | 41.829 | 18.726 | 26.714 |
| H | 40.85  | 18.554 | 26.536 |
| C | 42.582 | 19.147 | 25.517 |
| H | 43.626 | 19.358 | 25.75  |
| C | 42.383 | 18.159 | 24.421 |

|   |        |        |        |
|---|--------|--------|--------|
| H | 41.337 | 17.885 | 24.278 |
| H | 42.656 | 18.571 | 23.45  |
| C | 43.223 | 16.923 | 24.881 |
| H | 44.084 | 17.23  | 25.475 |
| H | 42.679 | 16.259 | 25.553 |
| C | 43.88  | 16.172 | 23.591 |
| O | 44.76  | 16.656 | 22.891 |
| N | 43.293 | 15.061 | 23.234 |
| H | 43.733 | 14.408 | 22.602 |
| H | 42.506 | 14.758 | 23.789 |
| C | 42.066 | 20.461 | 24.929 |
| O | 42.311 | 20.808 | 23.79  |
| N | 41.352 | 21.258 | 25.747 |
| H | 41.239 | 20.833 | 26.656 |
| C | 40.748 | 22.586 | 25.409 |
| H | 41.169 | 23.038 | 24.511 |
| C | 39.291 | 22.384 | 25.055 |
| H | 38.844 | 23.339 | 24.777 |
| C | 38.927 | 21.469 | 23.829 |
| H | 39.002 | 20.425 | 24.133 |
| H | 37.878 | 21.614 | 23.572 |
| H | 39.558 | 21.684 | 22.966 |
| C | 38.425 | 21.831 | 26.221 |
| H | 37.389 | 22.114 | 26.034 |
| H | 38.413 | 20.745 | 26.315 |
| H | 38.631 | 22.39  | 27.134 |
| C | 40.959 | 23.841 | 26.398 |
| O | 40.604 | 24.946 | 26.048 |
| N | 41.624 | 23.688 | 27.495 |
| H | 41.874 | 22.738 | 27.73  |
| C | 42.096 | 24.874 | 28.223 |
| H | 41.38  | 25.673 | 28.414 |
| C | 42.517 | 24.387 | 29.591 |
| H | 42.722 | 23.317 | 29.629 |
| C | 43.73  | 25.099 | 30.162 |
| H | 43.671 | 26.188 | 30.163 |
| H | 43.818 | 24.763 | 31.195 |
| H | 44.634 | 24.705 | 29.699 |
| C | 41.307 | 24.468 | 30.606 |
| H | 41.276 | 25.535 | 30.827 |
| H | 40.358 | 24.243 | 30.119 |
| C | 41.517 | 23.662 | 31.908 |
| H | 40.58  | 23.354 | 32.371 |
| H | 41.992 | 22.696 | 31.74  |
| H | 42.085 | 24.202 | 32.666 |
| C | 43.215 | 25.616 | 27.446 |
| O | 43.977 | 24.979 | 26.652 |

|   |        |        |        |
|---|--------|--------|--------|
| N | 43.421 | 26.913 | 27.582 |
| H | 42.804 | 27.404 | 28.212 |
| C | 44.407 | 27.734 | 26.824 |
| H | 44.39  | 28.76  | 27.191 |
| H | 45.399 | 27.284 | 26.875 |
| C | 44.104 | 27.962 | 25.341 |
| O | 44.804 | 28.694 | 24.655 |
| N | 43.074 | 27.36  | 24.768 |
| H | 42.651 | 26.615 | 25.303 |
| C | 42.628 | 27.681 | 23.376 |
| H | 43.511 | 28.002 | 22.824 |
| C | 42.07  | 26.405 | 22.647 |
| H | 41.126 | 26.061 | 23.071 |
| H | 41.881 | 26.731 | 21.624 |
| C | 42.927 | 25.169 | 22.58  |
| H | 43.797 | 25.323 | 21.942 |
| H | 43.302 | 24.86  | 23.555 |
| C | 42.283 | 23.966 | 21.953 |
| H | 41.542 | 23.519 | 22.616 |
| H | 41.752 | 24.316 | 21.068 |
| C | 43.411 | 23.018 | 21.578 |
| H | 44.021 | 23.523 | 20.829 |
| H | 44.04  | 22.892 | 22.459 |
| N | 42.968 | 21.696 | 21.005 |
| H | 42.426 | 21.203 | 21.699 |
| H | 42.32  | 21.826 | 20.241 |
| H | 43.745 | 21.142 | 20.673 |
| C | 41.488 | 28.746 | 23.464 |
| O | 40.679 | 28.776 | 24.395 |
| N | 41.28  | 29.488 | 22.383 |
| H | 42.06  | 29.472 | 21.741 |
| C | 40.217 | 30.433 | 22.147 |
| H | 39.947 | 31.027 | 23.02  |
| C | 40.785 | 31.505 | 21.108 |
| H | 41.572 | 32.046 | 21.631 |
| H | 41.142 | 30.988 | 20.217 |
| C | 39.847 | 32.63  | 20.761 |
| O | 38.665 | 32.5   | 20.926 |
| N | 40.171 | 33.652 | 20.016 |
| H | 39.354 | 34.184 | 19.753 |
| H | 41.123 | 33.86  | 19.751 |
| C | 38.871 | 29.624 | 21.803 |
| O | 38.784 | 28.678 | 21.022 |
| N | 37.809 | 30.019 | 22.464 |
| H | 37.834 | 30.72  | 23.191 |
| C | 36.486 | 29.372 | 22.32  |
| H | 36.619 | 28.302 | 22.482 |

|   |        |        |        |
|---|--------|--------|--------|
| C | 35.667 | 29.842 | 23.51  |
| H | 36.376 | 29.727 | 24.33  |
| H | 35.591 | 30.921 | 23.645 |
| C | 34.333 | 29.174 | 23.825 |
| C | 34.286 | 27.767 | 23.946 |
| H | 35.177 | 27.219 | 23.679 |
| C | 33.12  | 27.039 | 24.348 |
| H | 33.195 | 25.974 | 24.506 |
| C | 31.96  | 27.802 | 24.365 |
| H | 31.013 | 27.304 | 24.508 |
| C | 31.911 | 29.186 | 24.222 |
| H | 31.003 | 29.752 | 24.365 |
| C | 33.135 | 29.881 | 24.023 |
| H | 33.174 | 30.948 | 23.86  |
| C | 35.74  | 29.767 | 21.057 |
| O | 35.332 | 28.902 | 20.264 |
| N | 35.576 | 31.077 | 20.82  |
| H | 35.97  | 31.76  | 21.451 |
| C | 34.992 | 31.668 | 19.608 |
| H | 33.996 | 31.266 | 19.424 |
| C | 34.674 | 33.078 | 20.044 |
| H | 35.634 | 33.564 | 20.222 |
| H | 34.221 | 33.614 | 19.211 |
| C | 33.802 | 33.313 | 21.272 |
| C | 32.425 | 33.054 | 21.308 |
| H | 31.902 | 32.756 | 20.412 |
| C | 31.737 | 32.94  | 22.565 |
| H | 30.73  | 32.555 | 22.62  |
| C | 32.394 | 33.36  | 23.712 |
| H | 32.03  | 33.273 | 24.725 |
| C | 33.696 | 33.853 | 23.665 |
| H | 34.14  | 34.233 | 24.574 |
| C | 34.432 | 33.76  | 22.444 |
| H | 35.476 | 33.999 | 22.308 |
| C | 35.786 | 31.596 | 18.307 |
| O | 35.22  | 31.842 | 17.253 |
| N | 37.066 | 31.138 | 18.424 |
| H | 37.352 | 30.941 | 19.372 |
| C | 37.962 | 30.956 | 17.297 |
| H | 37.524 | 31.256 | 16.345 |
| C | 39.299 | 31.736 | 17.553 |
| H | 39.129 | 32.801 | 17.391 |
| H | 39.66  | 31.435 | 18.537 |
| C | 40.432 | 31.464 | 16.53  |
| H | 40.744 | 30.436 | 16.712 |
| H | 39.992 | 31.675 | 15.555 |
| C | 41.626 | 32.391 | 16.744 |

|   |        |        |        |
|---|--------|--------|--------|
| H | 41.367 | 33.383 | 16.377 |
| H | 41.877 | 32.441 | 17.804 |
| C | 42.797 | 31.916 | 15.919 |
| H | 42.515 | 31.545 | 14.934 |
| H | 43.518 | 32.728 | 15.82  |
| N | 43.451 | 30.766 | 16.571 |
| H | 42.798 | 30.003 | 16.672 |
| H | 44.169 | 30.441 | 15.94  |
| H | 43.803 | 30.968 | 17.496 |
| C | 38.294 | 29.451 | 17.052 |
| O | 38.086 | 28.905 | 15.983 |
| N | 38.802 | 28.745 | 18.083 |
| H | 38.697 | 29.084 | 19.028 |
| C | 39.521 | 27.499 | 17.888 |
| H | 39.768 | 27.399 | 16.831 |
| C | 40.827 | 27.472 | 18.75  |
| H | 40.558 | 27.614 | 19.797 |
| H | 41.279 | 26.481 | 18.741 |
| C | 41.92  | 28.405 | 18.183 |
| O | 42.319 | 28.254 | 16.996 |
| O | 42.421 | 29.246 | 18.946 |
| C | 38.694 | 26.258 | 18.259 |
| O | 39.077 | 25.14  | 17.814 |
| N | 37.639 | 26.328 | 19.095 |
| H | 37.458 | 27.288 | 19.349 |
| C | 36.987 | 25.206 | 19.935 |
| H | 37.408 | 24.303 | 19.493 |
| C | 37.24  | 25.315 | 21.448 |
| H | 36.836 | 26.297 | 21.694 |
| C | 36.55  | 24.243 | 22.234 |
| H | 35.462 | 24.309 | 22.195 |
| H | 36.902 | 23.278 | 21.869 |
| H | 36.808 | 24.342 | 23.288 |
| C | 38.718 | 25.289 | 21.819 |
| H | 39.219 | 26.095 | 21.282 |
| H | 38.831 | 25.35  | 22.902 |
| H | 39.165 | 24.348 | 21.498 |
| C | 35.429 | 25.092 | 19.629 |
| O | 34.872 | 24.055 | 19.183 |
| N | 34.778 | 26.282 | 19.691 |
| H | 35.336 | 27.056 | 20.021 |
| C | 33.309 | 26.439 | 19.584 |
| H | 32.865 | 25.483 | 19.309 |
| C | 32.785 | 26.801 | 21.023 |
| H | 33.151 | 27.778 | 21.337 |
| H | 31.696 | 26.76  | 21.037 |
| H | 33.209 | 26.162 | 21.798 |

|   |        |        |        |
|---|--------|--------|--------|
| C | 32.854 | 27.434 | 18.486 |
| O | 32.126 | 28.448 | 18.727 |
| N | 33.279 | 27.276 | 17.186 |
| C | 33.934 | 26.106 | 16.559 |
| H | 33.372 | 25.223 | 16.863 |
| H | 34.99  | 26.071 | 16.824 |
| C | 33.798 | 26.319 | 15.062 |
| H | 32.807 | 25.995 | 14.744 |
| H | 34.599 | 25.864 | 14.48  |
| C | 33.781 | 27.855 | 14.935 |
| H | 33.24  | 28.166 | 14.041 |
| H | 34.723 | 28.392 | 15.043 |
| C | 33.055 | 28.318 | 16.213 |
| H | 33.511 | 29.229 | 16.599 |
| C | 31.554 | 28.749 | 15.966 |
| O | 31.3   | 29.925 | 15.693 |
| N | 30.547 | 27.858 | 16.199 |
| H | 30.924 | 27.026 | 16.629 |
| C | 29.09  | 28.046 | 16.083 |
| H | 28.82  | 28.571 | 15.167 |
| C | 28.283 | 26.68  | 15.851 |
| H | 27.322 | 26.962 | 15.421 |
| H | 28.815 | 26.049 | 15.138 |
| S | 28.091 | 25.825 | 17.392 |
| C | 28.472 | 28.909 | 17.152 |
| O | 27.323 | 29.386 | 17.034 |
| N | 29.263 | 29.223 | 18.161 |
| H | 30.12  | 28.689 | 18.13  |
| C | 29.077 | 30.242 | 19.189 |
| H | 28.008 | 30.381 | 19.352 |
| C | 29.673 | 29.979 | 20.543 |
| H | 29.45  | 30.781 | 21.247 |
| C | 29.422 | 28.685 | 21.197 |
| H | 28.369 | 28.402 | 21.217 |
| H | 29.838 | 27.844 | 20.644 |
| H | 30.008 | 28.673 | 22.116 |
| O | 31.088 | 30.039 | 20.521 |
| H | 31.317 | 29.474 | 19.78  |
| C | 29.467 | 31.661 | 18.759 |
| O | 28.969 | 32.696 | 19.328 |
| N | 30.204 | 31.848 | 17.658 |
| H | 30.59  | 31.041 | 17.188 |
| C | 30.616 | 33.18  | 17.135 |
| H | 31.112 | 33.782 | 17.896 |
| C | 31.76  | 32.882 | 16.125 |
| H | 32.326 | 31.999 | 16.42  |
| H | 31.242 | 32.794 | 15.17  |

|   |        |        |        |
|---|--------|--------|--------|
| C | 32.686 | 34.109 | 15.933 |
| O | 33.236 | 34.641 | 16.888 |
| O | 32.653 | 34.645 | 14.775 |
| C | 29.545 | 34.105 | 16.573 |
| O | 29.798 | 34.982 | 15.757 |
| N | 28.271 | 33.881 | 16.769 |
| H | 28.021 | 33.073 | 17.322 |
| C | 27.106 | 34.563 | 16.188 |
| H | 27.344 | 34.765 | 15.144 |
| C | 25.83  | 33.662 | 16.081 |
| H | 25.084 | 34.019 | 15.37  |
| H | 26.145 | 32.681 | 15.725 |
| O | 25.204 | 33.477 | 17.358 |
| H | 25.02  | 32.547 | 17.51  |
| C | 26.84  | 35.891 | 16.88  |
| O | 27.264 | 36.081 | 17.976 |
| N | 26.059 | 36.792 | 16.253 |
| C | 25.501 | 36.713 | 14.922 |
| H | 24.894 | 35.807 | 14.903 |
| H | 26.246 | 36.487 | 14.159 |
| C | 24.715 | 37.937 | 14.569 |
| H | 23.793 | 37.606 | 14.092 |
| H | 25.307 | 38.605 | 13.944 |
| C | 24.513 | 38.641 | 15.897 |
| H | 23.481 | 38.662 | 16.248 |
| H | 24.867 | 39.656 | 15.717 |
| C | 25.423 | 37.917 | 16.959 |
| H | 26.244 | 38.598 | 17.187 |
| C | 24.576 | 37.558 | 18.238 |
| O | 24.46  | 38.34  | 19.183 |
| N | 24.083 | 36.376 | 18.223 |
| H | 24.213 | 35.805 | 17.4   |
| C | 23.088 | 35.992 | 19.296 |
| H | 22.609 | 36.862 | 19.745 |
| C | 21.959 | 35.073 | 18.722 |
| H | 22.393 | 34.145 | 18.349 |
| H | 21.264 | 34.722 | 19.485 |
| C | 21.02  | 35.699 | 17.684 |
| H | 20.243 | 36.313 | 18.139 |
| H | 21.669 | 36.294 | 17.041 |
| C | 20.401 | 34.64  | 16.862 |
| O | 20.704 | 34.613 | 15.648 |
| O | 19.69  | 33.827 | 17.415 |
| C | 23.803 | 35.24  | 20.481 |
| O | 23.191 | 34.869 | 21.487 |
| N | 25.125 | 35.181 | 20.51  |
| H | 25.642 | 35.451 | 19.685 |



|   |        |        |        |
|---|--------|--------|--------|
| C | 25.931 | 34.422 | 21.476 |
| H | 25.435 | 34.357 | 22.445 |
| C | 26.074 | 32.897 | 21.063 |
| H | 25.055 | 32.6   | 20.816 |
| H | 26.703 | 32.798 | 20.178 |
| C | 26.573 | 31.868 | 22.149 |
| C | 27.842 | 32.088 | 22.776 |
| H | 28.436 | 32.954 | 22.527 |
| C | 28.242 | 31.185 | 23.84  |
| H | 29.145 | 31.392 | 24.394 |
| C | 27.377 | 30.116 | 24.221 |
| H | 27.677 | 29.482 | 25.041 |
| C | 26.244 | 29.812 | 23.417 |
| H | 25.702 | 28.888 | 23.554 |
| C | 25.844 | 30.692 | 22.388 |
| H | 24.967 | 30.506 | 21.787 |
| C | 27.239 | 35.156 | 21.726 |
| O | 27.23  | 35.898 | 22.723 |
| N | 28.219 | 35.15  | 20.781 |
| H | 28.034 | 34.488 | 20.041 |
| C | 29.462 | 35.939 | 20.851 |
| H | 29.992 | 35.562 | 21.726 |
| C | 30.515 | 35.842 | 19.705 |
| H | 30.874 | 34.814 | 19.767 |
| H | 29.982 | 35.961 | 18.762 |
| C | 31.732 | 36.741 | 19.872 |
| C | 32.582 | 36.478 | 21.02  |
| H | 32.375 | 35.628 | 21.653 |
| C | 33.663 | 37.332 | 21.241 |
| H | 34.277 | 37.137 | 22.108 |
| C | 33.778 | 38.542 | 20.582 |
| O | 34.828 | 39.387 | 20.735 |
| H | 35.521 | 39.189 | 21.369 |
| C | 32.869 | 38.867 | 19.495 |
| H | 33.049 | 39.768 | 18.928 |
| C | 31.896 | 37.893 | 19.088 |
| H | 31.207 | 38.092 | 18.28  |
| C | 29.093 | 37.407 | 20.943 |
| O | 29.578 | 38.168 | 21.744 |
| N | 28.11  | 37.816 | 20.117 |
| H | 27.898 | 37.113 | 19.424 |
| C | 27.583 | 39.177 | 20.085 |
| H | 28.407 | 39.823 | 19.781 |
| H | 26.727 | 39.193 | 19.411 |
| C | 26.976 | 39.711 | 21.423 |
| O | 27.343 | 40.8   | 21.781 |
| N | 26.15  | 38.866 | 22.123 |

|   |        |        |        |
|---|--------|--------|--------|
| H | 25.963 | 37.954 | 21.732 |
| C | 25.604 | 39.176 | 23.425 |
| H | 25.234 | 40.196 | 23.331 |
| C | 24.51  | 38.148 | 23.689 |
| H | 24.993 | 37.185 | 23.521 |
| H | 24.119 | 38.131 | 24.706 |
| C | 23.243 | 38.33  | 22.768 |
| H | 23.046 | 39.402 | 22.761 |
| H | 23.476 | 38.187 | 21.712 |
| C | 22.095 | 37.452 | 23.273 |
| H | 22.382 | 36.401 | 23.258 |
| H | 21.89  | 37.612 | 24.331 |
| C | 20.85  | 37.602 | 22.445 |
| H | 20.649 | 38.663 | 22.592 |
| H | 20.99  | 37.426 | 21.379 |
| N | 19.849 | 36.642 | 22.903 |
| H | 20.158 | 35.682 | 22.839 |
| H | 19.583 | 36.721 | 23.874 |
| H | 18.996 | 36.621 | 22.362 |
| C | 26.717 | 39.169 | 24.515 |
| O | 26.676 | 39.909 | 25.435 |
| N | 27.694 | 38.272 | 24.417 |
| H | 27.574 | 37.596 | 23.677 |
| C | 28.859 | 38.129 | 25.318 |
| H | 28.55  | 38.029 | 26.359 |
| C | 29.552 | 36.785 | 24.891 |
| H | 28.808 | 36.001 | 25.028 |
| H | 29.803 | 36.78  | 23.83  |
| C | 30.827 | 36.416 | 25.668 |
| C | 30.755 | 35.925 | 27.015 |
| H | 29.771 | 35.819 | 27.446 |
| C | 31.945 | 35.556 | 27.74  |
| H | 31.752 | 35.182 | 28.734 |
| C | 33.176 | 35.735 | 27.161 |
| H | 34.11  | 35.529 | 27.664 |
| C | 33.258 | 36.36  | 25.859 |
| H | 34.254 | 36.547 | 25.485 |
| C | 32.091 | 36.689 | 25.169 |
| H | 32.102 | 37.225 | 24.231 |
| C | 29.769 | 39.314 | 25.212 |
| O | 30.186 | 39.817 | 26.229 |
| N | 30.096 | 39.856 | 24.039 |
| H | 29.828 | 39.276 | 23.257 |
| C | 31.173 | 40.783 | 23.786 |
| H | 32.125 | 40.582 | 24.278 |
| C | 31.542 | 40.819 | 22.257 |
| H | 32.561 | 41.199 | 22.179 |

|   |        |        |        |
|---|--------|--------|--------|
| H | 31.596 | 39.784 | 21.918 |
| C | 30.843 | 41.61  | 21.135 |
| H | 31.092 | 41.301 | 20.12  |
| H | 29.773 | 41.404 | 21.096 |
| C | 30.971 | 43.159 | 21.229 |
| H | 30.899 | 43.58  | 22.232 |
| H | 31.99  | 43.256 | 20.854 |
| C | 29.848 | 43.708 | 20.36  |
| H | 29.922 | 43.219 | 19.388 |
| H | 28.855 | 43.518 | 20.767 |
| N | 29.999 | 45.158 | 20.134 |
| H | 29.357 | 45.45  | 19.41  |
| H | 29.791 | 45.744 | 20.93  |
| H | 30.881 | 45.406 | 19.708 |
| C | 30.841 | 42.184 | 24.375 |
| O | 31.678 | 42.896 | 24.886 |
| N | 29.535 | 42.532 | 24.455 |
| H | 28.819 | 41.875 | 24.178 |
| C | 29.104 | 43.802 | 25.01  |
| H | 29.796 | 44.546 | 24.615 |
| C | 27.655 | 44.12  | 24.667 |
| H | 26.974 | 43.283 | 24.824 |
| H | 27.328 | 44.726 | 25.512 |
| C | 27.425 | 44.807 | 23.324 |
| H | 27.788 | 44.192 | 22.502 |
| H | 26.352 | 44.888 | 23.153 |
| C | 28.133 | 46.171 | 23.252 |
| O | 29.074 | 46.28  | 22.476 |
| O | 27.662 | 47.155 | 23.846 |
| C | 29.271 | 43.668 | 26.541 |
| O | 29.667 | 44.618 | 27.234 |
| N | 29.013 | 42.494 | 27.119 |
| H | 28.553 | 41.794 | 26.555 |
| C | 29.358 | 42.176 | 28.529 |
| H | 28.914 | 42.967 | 29.133 |
| H | 29.107 | 41.151 | 28.802 |
| C | 30.893 | 42.25  | 28.744 |
| O | 31.334 | 42.849 | 29.702 |
| N | 31.768 | 41.806 | 27.872 |
| H | 31.347 | 41.392 | 27.052 |
| C | 33.237 | 41.915 | 28.014 |
| H | 33.538 | 41.546 | 28.994 |
| C | 33.978 | 41.132 | 26.957 |
| H | 33.739 | 41.529 | 25.971 |
| C | 35.501 | 41.159 | 27.235 |
| H | 35.933 | 40.552 | 26.44  |
| H | 35.911 | 42.158 | 27.085 |

|   |        |        |        |
|---|--------|--------|--------|
| H | 35.803 | 40.839 | 28.232 |
| C | 33.528 | 39.675 | 27.046 |
| H | 34.229 | 39.111 | 26.43  |
| H | 33.735 | 39.242 | 28.024 |
| H | 32.513 | 39.463 | 26.709 |
| C | 33.676 | 43.367 | 27.888 |
| O | 34.529 | 43.82  | 28.643 |
| N | 33.109 | 44.176 | 26.908 |
| H | 32.319 | 43.811 | 26.395 |
| C | 33.48  | 45.573 | 26.709 |
| H | 34.565 | 45.606 | 26.611 |
| C | 32.893 | 45.899 | 25.357 |
| H | 31.804 | 45.894 | 25.402 |
| H | 33.119 | 46.896 | 24.98  |
| H | 33.19  | 45.206 | 24.57  |
| C | 32.961 | 46.468 | 27.867 |
| O | 33.602 | 47.432 | 28.249 |
| N | 31.809 | 46.235 | 28.464 |
| H | 31.086 | 45.687 | 28.019 |
| C | 31.381 | 46.895 | 29.703 |
| H | 31.567 | 47.969 | 29.687 |
| C | 29.857 | 46.907 | 29.727 |
| H | 29.507 | 47.408 | 30.63  |
| H | 29.448 | 47.517 | 28.921 |
| O | 29.319 | 45.636 | 29.766 |
| H | 29.333 | 45.111 | 28.963 |
| C | 31.986 | 46.43  | 31.01  |
| O | 31.858 | 47.192 | 31.966 |
| N | 32.636 | 45.251 | 31.086 |
| H | 32.825 | 44.719 | 30.248 |
| C | 33.082 | 44.688 | 32.367 |
| H | 33.937 | 44.018 | 32.278 |
| H | 33.528 | 45.496 | 32.946 |
| C | 31.971 | 44.081 | 33.232 |
| O | 32.231 | 43.876 | 34.442 |
| N | 30.754 | 43.954 | 32.718 |
| H | 30.634 | 44.098 | 31.725 |
| C | 29.617 | 43.401 | 33.441 |
| H | 30.036 | 42.735 | 34.194 |
| C | 28.797 | 44.535 | 34.106 |
| H | 28.141 | 44.079 | 34.848 |
| H | 29.415 | 45.259 | 34.637 |
| C | 27.851 | 45.306 | 33.179 |
| O | 26.701 | 44.969 | 32.951 |
| N | 28.265 | 46.488 | 32.742 |
| H | 27.672 | 46.903 | 32.038 |
| H | 29.237 | 46.762 | 32.763 |

|   |        |        |        |
|---|--------|--------|--------|
| C | 28.692 | 42.463 | 32.633 |
| O | 28.307 | 42.817 | 31.539 |
| N | 28.25  | 41.309 | 33.162 |
| H | 28.597 | 41.052 | 34.075 |
| C | 27.453 | 40.306 | 32.361 |
| H | 26.735 | 40.876 | 31.772 |
| C | 28.421 | 39.53  | 31.413 |
| H | 29.009 | 40.308 | 30.928 |
| H | 29.016 | 38.971 | 32.135 |
| C | 27.69  | 38.631 | 30.335 |
| H | 27.006 | 37.978 | 30.876 |
| C | 26.818 | 39.406 | 29.385 |
| H | 26.079 | 40.023 | 29.896 |
| H | 27.305 | 40.137 | 28.739 |
| H | 26.223 | 38.75  | 28.749 |
| C | 28.669 | 37.851 | 29.529 |
| H | 29.111 | 37.093 | 30.175 |
| H | 28.094 | 37.389 | 28.726 |
| H | 29.428 | 38.469 | 29.05  |
| C | 26.754 | 39.309 | 33.231 |
| O | 27.342 | 38.633 | 34.087 |
| N | 25.423 | 39.26  | 32.934 |
| H | 25.002 | 40.098 | 32.561 |
| C | 24.477 | 38.187 | 33.371 |
| H | 24.989 | 37.225 | 33.353 |
| C | 24.032 | 38.548 | 34.835 |
| H | 24.879 | 38.799 | 35.473 |
| H | 23.483 | 39.49  | 34.807 |
| C | 23.104 | 37.433 | 35.364 |
| O | 23.439 | 36.278 | 35.352 |
| N | 21.928 | 37.742 | 35.865 |
| H | 21.327 | 37.023 | 36.24  |
| H | 21.637 | 38.71  | 35.865 |
| C | 23.235 | 37.918 | 32.384 |
| O | 22.332 | 38.768 | 32.274 |
| N | 23.219 | 36.741 | 31.77  |
| H | 23.934 | 36.119 | 32.12  |
| C | 22.147 | 36.341 | 30.889 |
| H | 21.214 | 36.776 | 31.249 |
| C | 22.526 | 36.766 | 29.414 |
| H | 22.749 | 37.824 | 29.547 |
| C | 23.764 | 36.306 | 28.641 |
| H | 23.616 | 35.26  | 28.374 |
| H | 23.942 | 37.035 | 27.85  |
| H | 24.657 | 36.335 | 29.265 |
| O | 21.507 | 36.877 | 28.545 |
| H | 21.712 | 37.414 | 27.776 |

|   |        |        |        |
|---|--------|--------|--------|
| C | 21.9   | 34.853 | 30.771 |
| O | 22.824 | 34.079 | 30.916 |
| N | 20.64  | 34.477 | 30.426 |
| H | 19.885 | 35.13  | 30.277 |
| C | 20.263 | 33.043 | 30.21  |
| H | 21.144 | 32.412 | 30.091 |
| C | 19.465 | 32.554 | 31.42  |
| H | 19.842 | 32.9   | 32.383 |
| H | 18.46  | 32.969 | 31.35  |
| C | 19.232 | 31.059 | 31.511 |
| H | 18.91  | 30.648 | 30.554 |
| H | 20.19  | 30.551 | 31.622 |
| S | 18.095 | 30.364 | 32.767 |
| C | 19.274 | 30.288 | 34.115 |
| H | 20.185 | 29.797 | 33.773 |
| H | 19.473 | 31.326 | 34.379 |
| H | 18.933 | 29.861 | 35.059 |
| C | 19.525 | 32.953 | 28.924 |
| O | 18.72  | 33.779 | 28.628 |
| N | 19.826 | 31.906 | 28.149 |
| H | 20.385 | 31.108 | 28.417 |
| C | 19.142 | 31.683 | 26.907 |
| H | 18.074 | 31.848 | 27.049 |
| C | 19.501 | 32.611 | 25.753 |
| H | 18.914 | 32.388 | 24.862 |
| H | 19.111 | 33.574 | 26.083 |
| C | 20.922 | 32.661 | 25.447 |
| C | 21.694 | 33.773 | 25.911 |
| H | 21.276 | 34.569 | 26.511 |
| C | 23.071 | 33.83  | 25.582 |
| H | 23.673 | 34.611 | 26.021 |
| C | 23.615 | 32.882 | 24.733 |
| H | 24.684 | 32.88  | 24.586 |
| C | 22.876 | 31.757 | 24.28  |
| H | 23.335 | 31.002 | 23.659 |
| C | 21.556 | 31.62  | 24.744 |
| H | 21.001 | 30.74  | 24.451 |
| C | 19.303 | 30.149 | 26.5   |
| O | 19.641 | 29.317 | 27.388 |
| N | 18.954 | 29.813 | 25.273 |
| H | 18.782 | 30.522 | 24.575 |
| C | 19.009 | 28.462 | 24.709 |
| H | 19.637 | 27.92  | 25.416 |
| C | 17.561 | 27.906 | 24.563 |
| H | 17.02  | 28.628 | 23.953 |
| H | 17.65  | 26.952 | 24.043 |
| C | 16.804 | 27.673 | 25.88  |

|   |        |        |        |
|---|--------|--------|--------|
| H | 17.463 | 27.185 | 26.597 |
| H | 16.637 | 28.679 | 26.265 |
| C | 15.537 | 26.882 | 25.748 |
| O | 14.916 | 26.845 | 24.659 |
| O | 15.089 | 26.354 | 26.781 |
| C | 19.652 | 28.499 | 23.351 |
| O | 19.33  | 29.403 | 22.582 |
| N | 20.52  | 27.482 | 23.06  |
| H | 20.668 | 26.694 | 23.674 |
| C | 21.342 | 27.428 | 21.815 |
| H | 20.78  | 27.939 | 21.033 |
| C | 22.701 | 28.191 | 22.02  |
| H | 22.55  | 29.095 | 22.61  |
| H | 23.449 | 27.634 | 22.585 |
| C | 23.303 | 28.737 | 20.704 |
| C | 22.711 | 29.888 | 20.182 |
| H | 21.871 | 30.368 | 20.662 |
| C | 23.377 | 30.588 | 19.099 |
| H | 23.084 | 31.588 | 18.814 |
| C | 24.48  | 30.014 | 18.522 |
| O | 25.135 | 30.659 | 17.567 |
| H | 25.914 | 30.103 | 17.487 |
| C | 24.951 | 28.736 | 18.949 |
| H | 25.623 | 28.183 | 18.31  |
| C | 24.415 | 28.157 | 20.066 |
| H | 24.849 | 27.223 | 20.391 |
| C | 21.627 | 26.051 | 21.266 |
| O | 21.69  | 25.089 | 21.994 |
| N | 21.863 | 25.928 | 19.976 |
| H | 21.714 | 26.748 | 19.407 |
| C | 22.158 | 24.712 | 19.195 |
| H | 21.952 | 23.955 | 19.952 |
| C | 21.221 | 24.574 | 17.995 |
| H | 21.518 | 25.367 | 17.309 |
| C | 21.454 | 23.225 | 17.276 |
| H | 21.072 | 22.559 | 18.05  |
| H | 20.72  | 23.178 | 16.471 |
| H | 22.493 | 22.971 | 17.067 |
| O | 19.868 | 24.752 | 18.411 |
| H | 19.344 | 24.504 | 17.645 |
| C | 23.59  | 24.654 | 18.741 |
| O | 24.124 | 25.629 | 18.201 |
| N | 24.257 | 23.543 | 18.995 |
| H | 23.769 | 22.831 | 19.519 |
| C | 25.599 | 23.21  | 18.584 |
| H | 26.014 | 24.093 | 18.098 |
| C | 26.577 | 22.779 | 19.716 |

|   |        |        |        |
|---|--------|--------|--------|
| H | 26.399 | 21.729 | 19.948 |
| H | 27.588 | 22.905 | 19.329 |
| C | 26.566 | 23.6   | 21.019 |
| C | 26.492 | 24.941 | 20.934 |
| H | 26.681 | 25.448 | 19.999 |
| C | 26.554 | 25.712 | 22.111 |
| H | 26.509 | 26.789 | 22.04  |
| C | 26.723 | 25.107 | 23.338 |
| H | 26.658 | 25.622 | 24.285 |
| C | 26.815 | 23.745 | 23.456 |
| H | 27.069 | 23.272 | 24.393 |
| C | 26.749 | 22.972 | 22.276 |
| H | 26.733 | 21.898 | 22.382 |
| C | 25.573 | 22.174 | 17.469 |
| O | 24.801 | 21.215 | 17.422 |
| N | 26.528 | 22.283 | 16.552 |
| H | 27.277 | 22.95  | 16.668 |
| C | 26.465 | 21.58  | 15.191 |
| H | 26.095 | 20.571 | 15.368 |
| C | 25.42  | 22.257 | 14.348 |
| H | 25.448 | 21.752 | 13.382 |
| H | 24.484 | 22.142 | 14.895 |
| C | 25.65  | 23.743 | 14.073 |
| O | 24.874 | 24.585 | 14.563 |
| O | 26.544 | 24.078 | 13.243 |
| C | 27.828 | 21.393 | 14.496 |
| O | 28.049 | 20.293 | 13.896 |
| N | 28.766 | 22.344 | 14.573 |
| H | 28.536 | 23.213 | 15.034 |
| C | 30.07  | 22.18  | 13.92  |
| H | 29.789 | 22.028 | 12.878 |
| C | 30.838 | 23.477 | 14.01  |
| H | 30.093 | 24.209 | 13.698 |
| H | 31.223 | 23.656 | 15.014 |
| C | 32.114 | 23.551 | 13.156 |
| C | 32.036 | 24.091 | 11.82  |
| H | 31.096 | 24.374 | 11.37  |
| C | 33.303 | 24.277 | 11.157 |
| H | 33.168 | 24.473 | 10.104 |
| C | 34.525 | 23.889 | 11.717 |
| O | 35.584 | 23.942 | 10.885 |
| H | 36.171 | 23.384 | 11.4   |
| C | 34.542 | 23.363 | 13.027 |
| H | 35.466 | 23.127 | 13.535 |
| C | 33.343 | 23.102 | 13.721 |
| H | 33.502 | 22.658 | 14.693 |
| C | 30.905 | 20.986 | 14.401 |



|   |        |        |        |
|---|--------|--------|--------|
| O | 31.316 | 20.937 | 15.566 |
| N | 31.273 | 20.013 | 13.539 |
| H | 31.091 | 20.257 | 12.576 |
| C | 31.943 | 18.735 | 13.803 |
| H | 31.803 | 18.281 | 12.822 |
| C | 33.472 | 18.884 | 14.001 |
| H | 33.686 | 19.402 | 14.935 |
| H | 34.084 | 17.997 | 14.166 |
| C | 34.1   | 19.634 | 12.715 |
| H | 33.612 | 20.609 | 12.717 |
| H | 35.155 | 19.788 | 12.945 |
| C | 34.041 | 18.97  | 11.274 |
| O | 33.206 | 19.257 | 10.522 |
| N | 35.014 | 18.12  | 10.917 |
| H | 34.905 | 17.681 | 10.014 |
| H | 35.67  | 17.769 | 11.599 |
| C | 31.244 | 17.823 | 14.859 |
| O | 31.891 | 16.989 | 15.568 |
| N | 29.89  | 17.818 | 14.931 |
| H | 29.385 | 18.511 | 14.397 |
| C | 29.094 | 16.985 | 15.836 |
| H | 29.684 | 16.082 | 15.987 |
| C | 29.016 | 17.603 | 17.186 |
| H | 28.328 | 16.998 | 17.777 |
| H | 30.008 | 17.568 | 17.637 |
| C | 28.646 | 19.101 | 17.184 |
| H | 29.476 | 19.599 | 16.682 |
| H | 27.814 | 19.215 | 16.489 |
| S | 28.268 | 19.805 | 18.85  |
| C | 26.811 | 18.888 | 19.46  |
| H | 27.138 | 17.855 | 19.584 |
| H | 26.473 | 19.207 | 20.446 |
| H | 25.949 | 18.813 | 18.797 |
| C | 27.713 | 16.664 | 15.214 |
| O | 27.246 | 17.372 | 14.294 |
| N | 26.998 | 15.721 | 15.847 |
| H | 27.349 | 15.184 | 16.628 |
| C | 25.533 | 15.6   | 15.631 |
| H | 25.273 | 15.405 | 14.59  |
| C | 25.02  | 14.379 | 16.406 |
| H | 25.097 | 14.621 | 17.466 |
| C | 23.615 | 14.041 | 16.026 |
| H | 23.612 | 13.931 | 14.942 |
| H | 23.183 | 13.164 | 16.509 |
| H | 23.015 | 14.9   | 16.327 |
| O | 25.832 | 13.205 | 16.276 |
| H | 25.391 | 12.453 | 16.677 |

|   |        |        |        |
|---|--------|--------|--------|
| C | 24.765 | 16.852 | 16.221 |
| O | 24.78  | 16.994 | 17.433 |
| N | 23.936 | 17.549 | 15.444 |
| C | 23.717 | 17.314 | 14.014 |
| H | 23.022 | 16.482 | 13.905 |
| H | 24.641 | 17.133 | 13.466 |
| C | 23.08  | 18.617 | 13.532 |
| H | 22.407 | 18.468 | 12.687 |
| H | 23.811 | 19.359 | 13.211 |
| C | 22.264 | 19.168 | 14.725 |
| H | 21.302 | 18.672 | 14.856 |
| H | 22.225 | 20.258 | 14.704 |
| C | 23.236 | 18.734 | 15.882 |
| H | 24.066 | 19.435 | 15.971 |
| C | 22.514 | 18.528 | 17.239 |
| O | 21.654 | 17.665 | 17.408 |
| N | 22.879 | 19.37  | 18.267 |
| H | 23.46  | 20.188 | 18.148 |
| C | 22.299 | 19.125 | 19.628 |
| H | 21.308 | 18.682 | 19.538 |
| C | 23.202 | 18.236 | 20.54  |
| H | 24.162 | 18.751 | 20.504 |
| C | 22.674 | 18.11  | 22.027 |
| H | 23.187 | 17.244 | 22.444 |
| H | 22.944 | 19.007 | 22.584 |
| H | 21.6   | 17.952 | 22.13  |
| O | 23.382 | 16.978 | 20.004 |
| H | 23.485 | 17.172 | 19.069 |
| C | 22.092 | 20.459 | 20.392 |
| O | 22.992 | 21.26  | 20.539 |
| N | 20.882 | 20.617 | 20.92  |
| H | 20.223 | 19.855 | 20.997 |
| C | 20.399 | 21.828 | 21.632 |
| H | 21.017 | 22.649 | 21.27  |
| C | 18.916 | 22.097 | 21.287 |
| H | 18.625 | 21.941 | 20.248 |
| H | 18.295 | 21.421 | 21.875 |
| C | 18.498 | 23.534 | 21.65  |
| H | 18.765 | 23.763 | 22.682 |
| H | 19.067 | 24.202 | 21.003 |
| C | 16.971 | 23.583 | 21.563 |
| H | 16.714 | 23.744 | 20.516 |
| H | 16.535 | 22.65  | 21.919 |
| C | 16.461 | 24.705 | 22.496 |
| H | 16.841 | 24.472 | 23.49  |
| H | 16.961 | 25.628 | 22.202 |
| N | 14.996 | 24.861 | 22.46  |

|   |        |        |        |
|---|--------|--------|--------|
| H | 14.565 | 23.967 | 22.646 |
| H | 14.765 | 25.522 | 23.188 |
| H | 14.671 | 25.047 | 21.522 |
| C | 20.706 | 21.721 | 23.092 |
| O | 20.418 | 20.643 | 23.67  |
| N | 21.106 | 22.837 | 23.696 |
| H | 21.205 | 23.642 | 23.094 |
| C | 21.347 | 22.991 | 25.104 |
| H | 20.775 | 22.261 | 25.676 |
| C | 22.845 | 22.866 | 25.452 |
| H | 23.074 | 23.047 | 26.502 |
| C | 23.512 | 21.47  | 25.289 |
| H | 22.834 | 20.651 | 25.527 |
| H | 23.803 | 21.272 | 24.257 |
| H | 24.408 | 21.518 | 25.907 |
| C | 23.726 | 23.839 | 24.691 |
| H | 24.737 | 23.768 | 25.09  |
| H | 23.725 | 23.589 | 23.63  |
| H | 23.379 | 24.863 | 24.829 |
| C | 20.792 | 24.292 | 25.678 |
| O | 20.488 | 25.236 | 24.957 |
| N | 20.616 | 24.344 | 26.976 |
| H | 20.839 | 23.556 | 27.567 |
| C | 20.267 | 25.554 | 27.767 |
| H | 19.699 | 26.337 | 27.264 |
| C | 19.433 | 25.273 | 29.064 |
| H | 18.618 | 24.611 | 28.77  |
| H | 20.02  | 24.76  | 29.826 |
| C | 18.806 | 26.566 | 29.513 |
| H | 19.623 | 27.223 | 29.809 |
| H | 18.362 | 27.029 | 28.632 |
| C | 17.707 | 26.315 | 30.609 |
| H | 18.325 | 25.907 | 31.409 |
| H | 17.291 | 27.276 | 30.908 |
| C | 16.612 | 25.258 | 30.503 |
| H | 17.043 | 24.299 | 30.214 |
| H | 16.079 | 25.105 | 31.441 |
| N | 15.501 | 25.539 | 29.458 |
| H | 15.766 | 25.563 | 28.483 |
| H | 14.726 | 24.933 | 29.687 |
| H | 15.081 | 26.445 | 29.608 |
| C | 21.603 | 26.234 | 28.198 |
| O | 22.491 | 25.594 | 28.75  |
| N | 21.79  | 27.539 | 28.003 |
| H | 21.048 | 28.108 | 27.621 |
| C | 23.032 | 28.318 | 28.276 |
| H | 23.792 | 27.648 | 28.678 |

|   |        |        |        |
|---|--------|--------|--------|
| C | 23.524 | 28.884 | 26.992 |
| H | 22.773 | 29.393 | 26.387 |
| C | 24.755 | 29.87  | 27.23  |
| H | 24.413 | 30.737 | 27.795 |
| H | 25.583 | 29.389 | 27.751 |
| H | 25.112 | 30.296 | 26.292 |
| C | 24.264 | 27.821 | 26.058 |
| H | 23.685 | 26.909 | 25.914 |
| H | 24.378 | 28.258 | 25.066 |
| H | 25.242 | 27.517 | 26.432 |
| C | 22.769 | 29.386 | 29.325 |
| O | 21.691 | 29.953 | 29.292 |
| N | 23.737 | 29.618 | 30.241 |
| H | 24.537 | 29.003 | 30.223 |
| C | 23.847 | 30.711 | 31.162 |
| H | 23.153 | 31.481 | 30.825 |
| C | 23.484 | 30.311 | 32.622 |
| H | 22.593 | 29.691 | 32.52  |
| H | 24.21  | 29.61  | 33.033 |
| C | 23.324 | 31.536 | 33.583 |
| N | 22.104 | 31.846 | 34.14  |
| C | 22.287 | 33.049 | 34.686 |
| H | 21.436 | 33.603 | 35.052 |
| N | 23.576 | 33.477 | 34.578 |
| H | 24.011 | 34.336 | 34.884 |
| C | 24.237 | 32.484 | 33.868 |
| H | 25.248 | 32.563 | 33.496 |
| C | 25.158 | 31.309 | 30.971 |
| O | 26.157 | 30.564 | 30.97  |
| N | 25.298 | 32.627 | 30.75  |
| H | 24.462 | 33.187 | 30.836 |
| C | 26.604 | 33.307 | 30.704 |
| H | 27.358 | 32.557 | 30.941 |
| C | 26.989 | 33.98  | 29.344 |
| H | 26.243 | 34.766 | 29.22  |
| H | 27.984 | 34.404 | 29.476 |
| C | 26.997 | 33.058 | 28.125 |
| H | 27.61  | 32.176 | 28.312 |
| H | 26.009 | 32.607 | 28.033 |
| S | 27.56  | 33.866 | 26.553 |
| C | 26.484 | 35.333 | 26.448 |
| H | 25.516 | 35.13  | 26.905 |
| H | 26.783 | 36.143 | 27.113 |
| H | 26.42  | 35.719 | 25.43  |
| C | 26.607 | 34.413 | 31.81  |
| O | 25.609 | 35.187 | 31.917 |
| N | 27.669 | 34.324 | 32.626 |

|   |        |        |        |
|---|--------|--------|--------|
| H | 28.485 | 33.843 | 32.275 |
| C | 27.833 | 35.359 | 33.642 |
| H | 27.208 | 36.241 | 33.506 |
| C | 27.466 | 34.655 | 35.043 |
| H | 26.693 | 33.93  | 34.787 |
| H | 28.309 | 34.158 | 35.523 |
| C | 26.856 | 35.676 | 36.025 |
| H | 27.646 | 36.158 | 36.601 |
| H | 26.192 | 36.27  | 35.398 |
| C | 26.111 | 34.885 | 37.129 |
| H | 25.463 | 34.188 | 36.597 |
| H | 26.893 | 34.34  | 37.658 |
| C | 25.367 | 35.814 | 38.139 |
| H | 26.084 | 36.54  | 38.523 |
| H | 24.509 | 36.219 | 37.603 |
| N | 24.718 | 35.22  | 39.319 |
| H | 24.062 | 34.475 | 39.134 |
| H | 25.365 | 34.838 | 39.994 |
| H | 24.225 | 35.873 | 39.91  |
| C | 29.238 | 35.931 | 33.71  |
| O | 30.053 | 35.669 | 32.781 |
| N | 29.569 | 36.648 | 34.793 |
| H | 28.797 | 36.88  | 35.401 |
| C | 30.882 | 37.226 | 35.126 |
| H | 31.55  | 37.234 | 34.264 |
| C | 30.598 | 38.708 | 35.509 |
| H | 29.742 | 39.157 | 35.006 |
| H | 30.34  | 38.697 | 36.568 |
| C | 31.771 | 39.656 | 35.366 |
| H | 32.67  | 39.059 | 35.523 |
| H | 31.849 | 40.13  | 34.387 |
| C | 31.772 | 40.755 | 36.448 |
| H | 30.868 | 41.309 | 36.193 |
| H | 31.756 | 40.255 | 37.416 |
| C | 32.99  | 41.64  | 36.513 |
| H | 33.188 | 42.13  | 35.559 |
| H | 32.736 | 42.434 | 37.215 |
| N | 34.218 | 40.922 | 36.972 |
| H | 34.016 | 40.277 | 37.723 |
| H | 34.463 | 40.316 | 36.203 |
| H | 35.059 | 41.446 | 37.169 |
| C | 31.459 | 36.491 | 36.268 |
| O | 30.707 | 35.963 | 37.06  |
| N | 32.727 | 36.489 | 36.442 |
| H | 33.232 | 37.098 | 35.813 |
| C | 33.523 | 35.838 | 37.437 |
| H | 32.848 | 35.183 | 37.987 |

|   |        |        |        |
|---|--------|--------|--------|
| C | 34.514 | 34.838 | 36.849 |
| H | 35.355 | 35.414 | 36.464 |
| H | 34.666 | 33.909 | 37.398 |
| H | 34.07  | 34.4   | 35.955 |
| C | 34.179 | 36.89  | 38.37  |
| O | 34.211 | 38.096 | 38.072 |
| N | 34.856 | 36.519 | 39.505 |
| H | 34.963 | 35.53  | 39.679 |
| C | 35.31  | 37.509 | 40.507 |
| H | 34.549 | 38.286 | 40.583 |
| C | 35.564 | 36.916 | 41.915 |
| H | 36.399 | 36.216 | 41.893 |
| H | 35.656 | 37.714 | 42.652 |
| C | 34.427 | 36.001 | 42.476 |
| H | 34.314 | 35.105 | 41.865 |
| C | 34.555 | 35.505 | 43.902 |
| H | 34.459 | 36.298 | 44.643 |
| H | 33.835 | 34.716 | 44.116 |
| H | 35.524 | 35.008 | 43.948 |
| C | 33.114 | 36.654 | 42.312 |
| H | 33.176 | 37.655 | 42.739 |
| H | 32.842 | 36.657 | 41.256 |
| H | 32.407 | 36.026 | 42.853 |
| C | 36.554 | 38.356 | 40.11  |
| O | 36.632 | 39.468 | 40.581 |
| N | 37.324 | 38.032 | 39.099 |
| H | 37.11  | 37.183 | 38.596 |
| C | 38.371 | 38.9   | 38.565 |
| H | 38.746 | 39.479 | 39.409 |
| C | 39.546 | 38.06  | 37.965 |
| H | 39.266 | 37.544 | 37.047 |
| H | 40.304 | 38.84  | 37.9   |
| O | 40.061 | 37.127 | 38.906 |
| H | 40.884 | 36.756 | 38.579 |
| C | 37.808 | 39.932 | 37.598 |
| O | 36.699 | 39.909 | 37.136 |
| N | 38.62  | 40.871 | 37.174 |
| H | 39.564 | 40.879 | 37.532 |
| C | 38.259 | 42.052 | 36.39  |
| H | 37.306 | 42.461 | 36.723 |
| H | 39.032 | 42.811 | 36.515 |
| C | 38.093 | 41.869 | 34.872 |
| O | 37.339 | 42.613 | 34.245 |
| N | 38.581 | 40.761 | 34.301 |
| H | 39.271 | 40.258 | 34.841 |
| C | 38.54  | 40.29  | 32.91  |
| H | 37.631 | 40.677 | 32.448 |

|   |        |        |        |
|---|--------|--------|--------|
| C | 39.848 | 40.697 | 32.23  |
| H | 40.011 | 41.727 | 32.546 |
| H | 40.68  | 40.101 | 32.606 |
| C | 39.9   | 40.602 | 30.692 |
| O | 38.853 | 40.852 | 30.073 |
| O | 40.985 | 40.46  | 30.13  |
| C | 38.32  | 38.78  | 32.797 |
| O | 38.884 | 38.101 | 31.889 |
| N | 37.428 | 38.273 | 33.662 |
| H | 37.022 | 38.789 | 34.429 |
| C | 37.102 | 36.866 | 33.716 |
| H | 37.6   | 36.411 | 32.86  |
| C | 37.716 | 36.145 | 34.986 |
| H | 37.375 | 36.828 | 35.763 |
| H | 37.276 | 35.156 | 35.117 |
| O | 39.127 | 36.186 | 34.929 |
| H | 39.444 | 35.532 | 35.556 |
| C | 35.601 | 36.648 | 33.626 |
| O | 34.79  | 37.366 | 34.162 |
| N | 35.178 | 35.587 | 32.952 |
| H | 35.875 | 35.008 | 32.506 |
| C | 33.768 | 35.333 | 32.559 |
| H | 33.152 | 35.963 | 33.201 |
| C | 33.541 | 35.908 | 31.141 |
| H | 34.24  | 35.343 | 30.524 |
| H | 32.495 | 35.704 | 30.912 |
| C | 33.822 | 37.38  | 31.043 |
| C | 35.103 | 37.809 | 30.613 |
| H | 35.85  | 37.139 | 30.214 |
| C | 35.456 | 39.17  | 30.799 |
| H | 36.39  | 39.548 | 30.411 |
| C | 34.465 | 40.059 | 31.246 |
| O | 34.881 | 41.331 | 31.532 |
| H | 35.714 | 41.591 | 31.133 |
| C | 33.192 | 39.556 | 31.59  |
| H | 32.406 | 40.235 | 31.889 |
| C | 32.803 | 38.22  | 31.383 |
| H | 31.86  | 37.776 | 31.668 |
| C | 33.317 | 33.859 | 32.591 |
| O | 34.093 | 32.965 | 32.719 |
| N | 32.028 | 33.623 | 32.68  |
| H | 31.441 | 34.442 | 32.623 |
| C | 31.466 | 32.303 | 32.908 |
| H | 32.263 | 31.569 | 33.023 |
| C | 30.805 | 32.129 | 34.317 |
| H | 30.272 | 33.041 | 34.584 |
| H | 29.921 | 31.497 | 34.232 |

|   |        |        |        |
|---|--------|--------|--------|
| C | 31.637 | 31.664 | 35.502 |
| C | 31.672 | 32.317 | 36.668 |
| H | 31.247 | 33.282 | 36.903 |
| N | 32.425 | 31.611 | 37.535 |
| H | 32.702 | 31.962 | 38.441 |
| C | 32.922 | 30.457 | 37.004 |
| C | 33.736 | 29.481 | 37.448 |
| H | 34.217 | 29.588 | 38.409 |
| C | 33.951 | 28.343 | 36.64  |
| H | 34.63  | 27.59  | 37.012 |
| C | 33.281 | 28.149 | 35.404 |
| H | 33.417 | 27.223 | 34.867 |
| C | 32.498 | 29.202 | 34.963 |
| H | 31.963 | 29.107 | 34.029 |
| C | 32.261 | 30.367 | 35.726 |
| C | 30.566 | 31.868 | 31.718 |
| O | 29.903 | 32.691 | 31.15  |
| N | 30.406 | 30.549 | 31.663 |
| H | 30.849 | 29.938 | 32.333 |
| C | 29.337 | 29.907 | 30.897 |
| H | 28.497 | 30.594 | 30.794 |
| C | 29.749 | 29.477 | 29.44  |
| H | 30.384 | 28.593 | 29.49  |
| C | 28.589 | 28.998 | 28.623 |
| H | 28.959 | 28.772 | 27.623 |
| H | 28.113 | 28.054 | 28.891 |
| H | 27.836 | 29.786 | 28.636 |
| C | 30.486 | 30.511 | 28.598 |
| H | 31.535 | 30.523 | 28.895 |
| H | 30.476 | 30.157 | 27.567 |
| H | 30.036 | 31.489 | 28.771 |
| C | 28.981 | 28.687 | 31.702 |
| O | 29.856 | 28.062 | 32.301 |
| N | 27.693 | 28.239 | 31.542 |
| H | 27.177 | 28.886 | 30.963 |
| C | 27.123 | 26.952 | 31.938 |
| H | 27.943 | 26.236 | 31.998 |
| C | 26.425 | 27.056 | 33.305 |
| H | 25.42  | 27.453 | 33.165 |
| H | 26.373 | 26.019 | 33.637 |
| C | 27.234 | 27.819 | 34.335 |
| C | 28.408 | 27.227 | 34.737 |
| H | 28.701 | 26.275 | 34.322 |
| C | 29.205 | 27.869 | 35.652 |
| H | 30.102 | 27.323 | 35.903 |
| C | 28.894 | 29.169 | 36.077 |
| H | 29.586 | 29.792 | 36.624 |



|   |        |        |        |
|---|--------|--------|--------|
| C | 27.684 | 29.817 | 35.671 |
| H | 27.386 | 30.801 | 36.004 |
| C | 26.855 | 29.133 | 34.763 |
| H | 25.89  | 29.57  | 34.554 |
| C | 26.223 | 26.401 | 30.876 |
| O | 25.677 | 27.111 | 30.055 |
| N | 26.182 | 25.047 | 30.802 |
| H | 26.65  | 24.493 | 31.504 |
| C | 25.469 | 24.368 | 29.723 |
| H | 24.695 | 25.051 | 29.374 |
| C | 26.384 | 24.025 | 28.536 |
| H | 25.685 | 23.508 | 27.878 |
| C | 26.755 | 25.213 | 27.618 |
| H | 27.528 | 25.719 | 28.196 |
| H | 27.07  | 24.833 | 26.646 |
| H | 25.944 | 25.935 | 27.522 |
| C | 27.645 | 23.138 | 28.852 |
| H | 27.301 | 22.113 | 28.993 |
| H | 28.323 | 23.27  | 28.009 |
| H | 28.065 | 23.56  | 29.765 |
| C | 24.774 | 23.092 | 30.245 |
| O | 25.36  | 22.412 | 31.074 |
| N | 23.592 | 22.706 | 29.821 |
| H | 23.097 | 23.349 | 29.219 |
| C | 22.996 | 21.367 | 29.998 |
| H | 23.826 | 20.662 | 29.948 |
| C | 22.297 | 21.281 | 31.42  |
| H | 21.941 | 20.277 | 31.65  |
| H | 23.118 | 21.46  | 32.115 |
| C | 21.132 | 22.299 | 31.6   |
| H | 21.555 | 23.304 | 31.574 |
| H | 20.509 | 22.142 | 30.719 |
| C | 20.391 | 21.977 | 32.897 |
| H | 19.884 | 21.015 | 32.836 |
| H | 21.108 | 21.951 | 33.717 |
| C | 19.195 | 22.954 | 33.172 |
| H | 19.515 | 23.957 | 33.455 |
| H | 18.581 | 22.955 | 32.272 |
| N | 18.468 | 22.544 | 34.37  |
| H | 18.96  | 22.477 | 35.249 |
| H | 17.768 | 23.248 | 34.555 |
| H | 17.954 | 21.684 | 34.237 |
| C | 21.974 | 20.966 | 28.885 |
| O | 21.444 | 21.852 | 28.133 |
| N | 21.644 | 19.666 | 28.845 |
| H | 22.122 | 19.17  | 29.584 |
| C | 20.64  | 19.117 | 27.933 |

|   |        |        |        |
|---|--------|--------|--------|
| H | 20.917 | 19.406 | 26.919 |
| C | 20.842 | 17.621 | 27.759 |
| H | 20.74  | 17.18  | 28.75  |
| H | 20.004 | 17.318 | 27.131 |
| C | 22.173 | 17.035 | 27.186 |
| H | 22.165 | 17.197 | 26.108 |
| H | 22.987 | 17.55  | 27.696 |
| C | 22.179 | 15.535 | 27.424 |
| H | 21.885 | 15.224 | 28.426 |
| H | 21.417 | 14.99  | 26.866 |
| N | 23.435 | 14.854 | 27.077 |
| H | 24.102 | 14.78  | 27.832 |
| C | 23.765 | 14.469 | 25.891 |
| N | 23.063 | 14.679 | 24.792 |
| H | 22.132 | 15.069 | 24.793 |
| H | 23.459 | 14.409 | 23.903 |
| N | 24.934 | 13.952 | 25.713 |
| H | 25.243 | 13.555 | 24.837 |
| H | 25.557 | 13.82  | 26.497 |
| C | 19.165 | 19.439 | 28.286 |
| O | 18.82  | 19.464 | 29.502 |
| N | 18.344 | 19.584 | 27.277 |
| H | 18.661 | 19.411 | 26.334 |
| C | 16.927 | 19.864 | 27.27  |
| H | 16.514 | 19.502 | 28.212 |
| C | 16.624 | 21.425 | 27.197 |
| H | 15.555 | 21.63  | 27.14  |
| C | 17.082 | 22.081 | 28.504 |
| H | 16.878 | 23.15  | 28.572 |
| H | 16.61  | 21.541 | 29.324 |
| H | 18.138 | 21.888 | 28.693 |
| C | 17.461 | 22.145 | 26.083 |
| H | 17.081 | 23.151 | 25.908 |
| H | 18.511 | 22.128 | 26.377 |
| H | 17.347 | 21.616 | 25.137 |
| C | 16.189 | 19.051 | 26.197 |
| O | 16.584 | 19.1   | 25.01  |
| O | 15.104 | 18.514 | 26.526 |
| C | 29.616 | 25.033 | 17.761 |
| O | 30.522 | 25.039 | 16.868 |
| C | 29.729 | 24.738 | 19.1   |
| C | 30.959 | 24.075 | 19.621 |
| C | 31.231 | 23.779 | 20.939 |
| C | 32.427 | 23.016 | 21.284 |
| C | 32.723 | 22.587 | 22.58  |
| C | 31.781 | 22.821 | 23.655 |
| C | 30.67  | 23.701 | 23.328 |

|    |        |        |        |
|----|--------|--------|--------|
| C  | 30.421 | 24.174 | 22.062 |
| O  | 31.899 | 22.371 | 24.784 |
| H  | 28.853 | 24.8   | 19.744 |
| H  | 31.741 | 23.975 | 18.87  |
| H  | 33.184 | 22.735 | 20.56  |
| H  | 33.592 | 21.981 | 22.812 |
| H  | 29.87  | 23.693 | 24.06  |
| H  | 29.502 | 24.731 | 21.916 |
| Na | 41.47  | 39.807 | 27.865 |
| Na | 43.435 | 21.384 | 38.929 |
| Na | 31.027 | 36.387 | 14.284 |
| Na | 11.56  | 34.361 | 43.233 |
| Na | 32.004 | 12.84  | 29.979 |
| Na | 40.861 | 42.66  | 25.165 |
| O  | 61.169 | 52.996 | 49.902 |
| H  | 60.223 | 53.111 | 49.81  |
| H  | 61.33  | 52.097 | 49.616 |
| O  | 49.759 | 55.925 | 56.114 |
| H  | 49.152 | 55.198 | 55.975 |
| H  | 50.29  | 55.654 | 56.862 |
| O  | 47.252 | 51.974 | 50.345 |
| H  | 47.757 | 51.616 | 49.615 |
| H  | 46.445 | 51.459 | 50.354 |
| O  | 47.889 | 48.484 | 61.943 |
| H  | 47.601 | 47.775 | 61.369 |
| H  | 47.996 | 49.236 | 61.361 |
| O  | 55.496 | 44.551 | 63.594 |
| H  | 55.663 | 45.288 | 63.007 |
| H  | 56.003 | 44.752 | 64.381 |
| O  | 57.728 | 56.44  | 53.234 |
| H  | 57.701 | 55.567 | 53.623 |
| H  | 58.654 | 56.589 | 53.042 |
| O  | 45.533 | 62.49  | 52.018 |
| H  | 45.477 | 63.268 | 52.574 |
| H  | 46.349 | 62.602 | 51.531 |
| O  | 48.374 | 54.03  | 54.926 |
| H  | 47.568 | 54.488 | 54.687 |
| H  | 48.529 | 53.424 | 54.201 |
| O  | 54.742 | 43.562 | 55.527 |
| H  | 55.623 | 43.293 | 55.267 |
| H  | 54.607 | 43.147 | 56.379 |
| O  | 59.27  | 51.835 | 52.636 |
| H  | 60.036 | 51.361 | 52.311 |
| H  | 59.439 | 51.951 | 53.571 |
| O  | 61.334 | 39.052 | 47.545 |
| H  | 60.606 | 38.703 | 48.06  |
| H  | 61.864 | 39.536 | 48.178 |

|   |        |        |        |
|---|--------|--------|--------|
| O | 55.826 | 59.367 | 48.029 |
| H | 56.277 | 58.788 | 48.643 |
| H | 56.495 | 59.601 | 47.385 |
| O | 53.154 | 52.59  | 45.067 |
| H | 53.447 | 52.74  | 45.965 |
| H | 52.205 | 52.712 | 45.101 |
| O | 45.264 | 58.972 | 57.197 |
| H | 44.615 | 58.853 | 57.891 |
| H | 45.352 | 58.106 | 56.8   |
| O | 56.857 | 42.775 | 53.679 |
| H | 56.165 | 42.173 | 53.406 |
| H | 57.062 | 42.513 | 54.577 |
| O | 61.772 | 49.948 | 59.935 |
| H | 61.417 | 50.801 | 59.682 |
| H | 62.339 | 50.138 | 60.682 |
| O | 56.854 | 46.833 | 57.181 |
| H | 57.013 | 47.743 | 57.431 |
| H | 55.91  | 46.788 | 57.026 |
| O | 51.381 | 52.06  | 53.647 |
| H | 50.473 | 51.789 | 53.508 |
| H | 51.86  | 51.679 | 52.911 |
| O | 56.341 | 53.689 | 53.78  |
| H | 55.87  | 53.834 | 52.959 |
| H | 55.669 | 53.387 | 54.392 |
| O | 42.996 | 52.341 | 58.535 |
| H | 43.075 | 51.529 | 58.035 |
| H | 42.103 | 52.325 | 58.879 |
| O | 49.321 | 48.611 | 51.273 |
| H | 48.537 | 48.16  | 50.961 |
| H | 49.875 | 48.693 | 50.497 |
| O | 55.339 | 55.792 | 49.026 |
| H | 55.664 | 55.354 | 48.239 |
| H | 55.997 | 56.46  | 49.218 |
| O | 58.651 | 51.448 | 58.169 |
| H | 58.286 | 50.626 | 58.495 |
| H | 58.197 | 51.599 | 57.339 |
| O | 54.112 | 55.811 | 55.103 |
| H | 54.728 | 56.131 | 55.762 |
| H | 54.074 | 54.865 | 55.25  |
| O | 52.797 | 55.129 | 49.074 |
| H | 52.544 | 55.001 | 49.988 |
| H | 53.599 | 55.65  | 49.119 |
| O | 50.449 | 54.797 | 47.646 |
| H | 50.499 | 54.118 | 46.973 |
| H | 51.272 | 54.718 | 48.128 |
| O | 49.389 | 43.985 | 61.234 |
| H | 49.525 | 44.446 | 60.407 |

|   |        |        |        |
|---|--------|--------|--------|
| H | 50.145 | 43.402 | 61.311 |
| O | 55.159 | 47.659 | 49.778 |
| H | 55.266 | 46.708 | 49.81  |
| H | 54.936 | 47.906 | 50.675 |
| O | 57.556 | 60.856 | 46.572 |
| H | 58.446 | 61.144 | 46.366 |
| H | 57.015 | 61.237 | 45.88  |
| O | 49.58  | 55.81  | 50.053 |
| H | 49.894 | 55.454 | 49.222 |
| H | 50.25  | 56.444 | 50.309 |
| O | 53.562 | 59.03  | 49.824 |
| H | 54.402 | 59.105 | 49.37  |
| H | 53.113 | 58.312 | 49.379 |
| O | 52.15  | 54.796 | 51.706 |
| H | 51.48  | 54.142 | 51.903 |
| H | 51.999 | 55.494 | 52.343 |
| O | 46.569 | 52.651 | 59.679 |
| H | 47.212 | 52.691 | 58.971 |
| H | 45.926 | 52.007 | 59.383 |
| O | 51.652 | 60.858 | 56.545 |
| H | 51.657 | 60.376 | 57.372 |
| H | 51.357 | 60.218 | 55.896 |
| O | 59.305 | 50.535 | 46.889 |
| H | 59.69  | 49.807 | 47.378 |
| H | 58.362 | 50.381 | 46.935 |
| O | 48.07  | 65.99  | 43.08  |
| H | 49.009 | 66.174 | 43.084 |
| H | 47.822 | 65.993 | 44.004 |
| O | 53.228 | 57.479 | 47.32  |
| H | 52.869 | 56.592 | 47.352 |
| H | 54.1   | 57.371 | 46.942 |
| O | 53.948 | 52.536 | 47.922 |
| H | 54.344 | 51.879 | 48.495 |
| H | 53.76  | 53.275 | 48.501 |
| O | 48.567 | 51.44  | 44.513 |
| H | 48.418 | 50.55  | 44.832 |
| H | 48.874 | 51.324 | 43.614 |
| O | 54.99  | 54.591 | 40.364 |
| H | 55.116 | 54.593 | 41.313 |
| H | 55.45  | 55.374 | 40.06  |
| O | 51.915 | 46.937 | 47.613 |
| H | 51.613 | 46.044 | 47.774 |
| H | 52.494 | 46.861 | 46.854 |
| O | 56.178 | 44.818 | 46.017 |
| H | 56.764 | 44.842 | 46.773 |
| H | 55.519 | 44.162 | 46.245 |
| O | 55.622 | 61.389 | 44.596 |

|   |        |        |        |
|---|--------|--------|--------|
| H | 55.702 | 61.254 | 43.652 |
| H | 54.68  | 61.466 | 44.748 |
| O | 52.104 | 60.13  | 53.987 |
| H | 52.162 | 61.045 | 53.712 |
| H | 52.855 | 59.707 | 53.572 |
| O | 55.148 | 53.713 | 51.415 |
| H | 54.386 | 54.201 | 51.728 |
| H | 55.43  | 54.186 | 50.632 |
| O | 58.034 | 48.824 | 53.366 |
| H | 57.489 | 48.751 | 54.15  |
| H | 57.452 | 49.195 | 52.703 |
| O | 46.575 | 47.118 | 59.658 |
| H | 46.05  | 47.798 | 59.236 |
| H | 47.013 | 46.67  | 58.934 |
| O | 54.682 | 52.968 | 55.617 |
| H | 54.918 | 53.061 | 56.54  |
| H | 54.213 | 52.135 | 55.572 |
| O | 49.902 | 48.102 | 53.883 |
| H | 49.642 | 48.482 | 53.044 |
| H | 49.604 | 47.193 | 53.837 |
| O | 51.004 | 55.249 | 58.469 |
| H | 50.925 | 55.601 | 59.356 |
| H | 51.946 | 55.23  | 58.302 |
| O | 56.913 | 51.397 | 51.472 |
| H | 56.484 | 52.242 | 51.601 |
| H | 57.749 | 51.48  | 51.93  |
| O | 54.206 | 47.43  | 56.496 |
| H | 53.743 | 46.804 | 57.053 |
| H | 53.687 | 47.464 | 55.692 |
| O | 62.103 | 58.049 | 37.045 |
| H | 61.272 | 58.334 | 37.427 |
| H | 61.851 | 57.453 | 36.34  |
| O | 46.169 | 60.537 | 37.295 |
| H | 45.326 | 60.893 | 37.015 |
| H | 46.154 | 60.611 | 38.25  |
| O | 46.281 | 51.891 | 36.741 |
| H | 46.697 | 51.861 | 35.879 |
| H | 45.808 | 51.061 | 36.808 |
| O | 50.761 | 53.14  | 37.444 |
| H | 51.307 | 53.605 | 38.077 |
| H | 49.9   | 53.55  | 37.523 |
| O | 47.618 | 54.287 | 44.319 |
| H | 47.693 | 54.513 | 45.246 |
| H | 47.699 | 53.333 | 44.298 |
| O | 57.292 | 53.374 | 39.676 |
| H | 56.376 | 53.65  | 39.68  |
| H | 57.299 | 52.571 | 39.155 |

|   |        |        |        |
|---|--------|--------|--------|
| O | 50.406 | 56.386 | 34.141 |
| H | 49.64  | 56.548 | 34.691 |
| H | 50.191 | 56.796 | 33.303 |
| O | 49.042 | 57.996 | 37.945 |
| H | 49.627 | 58.753 | 37.932 |
| H | 49.429 | 57.406 | 38.592 |
| O | 56.169 | 56.751 | 33.529 |
| H | 56.961 | 57.033 | 33.072 |
| H | 55.528 | 56.61  | 32.832 |
| O | 50.441 | 55.849 | 44.71  |
| H | 49.995 | 56.292 | 45.431 |
| H | 51.222 | 56.379 | 44.55  |
| O | 51.792 | 49.757 | 39.334 |
| H | 52.203 | 49.228 | 40.017 |
| H | 50.887 | 49.445 | 39.301 |
| O | 63.877 | 45.222 | 36.95  |
| H | 63.094 | 45.717 | 37.191 |
| H | 63.969 | 45.361 | 36.008 |
| O | 59.432 | 55.424 | 33.596 |
| H | 60.29  | 55.432 | 33.172 |
| H | 59.103 | 56.317 | 33.487 |
| O | 58.677 | 56.063 | 26.854 |
| H | 58.851 | 55.144 | 26.652 |
| H | 58.438 | 56.452 | 26.013 |
| O | 58.203 | 57.615 | 32.112 |
| H | 58.492 | 57.288 | 31.26  |
| H | 58.228 | 58.568 | 32.025 |
| O | 59.257 | 51.65  | 41.624 |
| H | 58.632 | 51.944 | 40.962 |
| H | 58.82  | 50.917 | 42.058 |
| O | 57.15  | 63.327 | 35.631 |
| H | 56.381 | 63.878 | 35.484 |
| H | 56.793 | 62.454 | 35.789 |
| O | 43.884 | 54.685 | 30.245 |
| H | 44.488 | 54.14  | 30.75  |
| H | 43.328 | 54.06  | 29.782 |
| O | 44.5   | 59.582 | 42.593 |
| H | 44.682 | 59.192 | 43.448 |
| H | 43.739 | 60.144 | 42.744 |
| O | 53.999 | 49.782 | 37.892 |
| H | 53.889 | 50.567 | 37.355 |
| H | 53.173 | 49.702 | 38.371 |
| O | 52.525 | 53.933 | 39.039 |
| H | 53.261 | 54.46  | 39.352 |
| H | 52.494 | 53.187 | 39.638 |
| O | 60.489 | 50.712 | 29.402 |
| H | 60.342 | 51.657 | 29.352 |

|   |        |        |        |
|---|--------|--------|--------|
| H | 61.269 | 50.62  | 29.948 |
| O | 57.842 | 44.681 | 39.564 |
| H | 58.044 | 44.223 | 38.748 |
| H | 56.919 | 44.485 | 39.726 |
| O | 56.639 | 54.476 | 30.592 |
| H | 56.206 | 53.713 | 30.21  |
| H | 55.935 | 54.958 | 31.027 |
| O | 55.844 | 61.093 | 36.255 |
| H | 55.468 | 60.593 | 35.53  |
| H | 55.183 | 61.048 | 36.946 |
| O | 53.098 | 56.541 | 43.871 |
| H | 53.797 | 56.319 | 44.487 |
| H | 52.984 | 55.75  | 43.344 |
| O | 39.471 | 45.575 | 36.357 |
| H | 39.438 | 45.411 | 37.299 |
| H | 38.978 | 46.387 | 36.238 |
| O | 50.788 | 48.632 | 43.753 |
| H | 51.658 | 48.26  | 43.896 |
| H | 50.954 | 49.539 | 43.496 |
| O | 45.207 | 49.92  | 39.831 |
| H | 45.201 | 49.019 | 40.156 |
| H | 44.584 | 49.917 | 39.105 |
| O | 53.461 | 47.184 | 24.262 |
| H | 53.226 | 46.293 | 24.004 |
| H | 52.622 | 47.627 | 24.388 |
| O | 60.826 | 51.784 | 37.817 |
| H | 59.877 | 51.7   | 37.717 |
| H | 61.184 | 51.036 | 37.339 |
| O | 50.673 | 60.121 | 38.235 |
| H | 50.285 | 60.834 | 38.742 |
| H | 50.719 | 60.461 | 37.341 |
| O | 46.075 | 62.293 | 43.684 |
| H | 46.684 | 61.667 | 44.077 |
| H | 45.31  | 61.767 | 43.45  |
| O | 57.94  | 51.426 | 37.549 |
| H | 57.58  | 51.223 | 36.686 |
| H | 58.203 | 50.577 | 37.904 |
| O | 47.462 | 55.331 | 24.208 |
| H | 48.231 | 55.406 | 23.643 |
| H | 47.218 | 56.236 | 24.403 |
| O | 61.113 | 57.145 | 41.839 |
| H | 60.653 | 56.306 | 41.813 |
| H | 62.037 | 56.909 | 41.926 |
| O | 56.855 | 48.514 | 40.788 |
| H | 57.576 | 47.887 | 40.746 |
| H | 56.358 | 48.362 | 39.984 |
| O | 54.894 | 54.352 | 43.266 |



|   |        |        |        |
|---|--------|--------|--------|
| H | 54.437 | 53.747 | 43.85  |
| H | 55.812 | 54.296 | 43.533 |
| O | 53.688 | 56.507 | 27.653 |
| H | 53.278 | 56.882 | 28.433 |
| H | 52.983 | 56.027 | 27.219 |
| O | 56.225 | 54.238 | 46.668 |
| H | 56.32  | 53.527 | 46.034 |
| H | 56.356 | 53.819 | 47.519 |
| O | 44.356 | 58.657 | 25.347 |
| H | 45.127 | 58.836 | 25.884 |
| H | 44.384 | 57.713 | 25.194 |
| O | 44.015 | 55.036 | 44.201 |
| H | 44.871 | 55.449 | 44.319 |
| H | 43.451 | 55.467 | 44.842 |
| O | 57.029 | 57.935 | 43.973 |
| H | 56.946 | 57.035 | 43.657 |
| H | 56.78  | 58.476 | 43.224 |
| O | 46.094 | 60.153 | 27.588 |
| H | 46.333 | 60.283 | 28.505 |
| H | 45.435 | 60.825 | 27.415 |
| O | 55.47  | 52.06  | 29.839 |
| H | 55.387 | 51.127 | 29.642 |
| H | 55.293 | 52.122 | 30.778 |
| O | 51.742 | 48.503 | 35.675 |
| H | 52.572 | 48.708 | 35.245 |
| H | 51.235 | 49.313 | 35.615 |
| O | 41.14  | 40.739 | 46.246 |
| H | 41.847 | 40.725 | 45.6   |
| H | 40.548 | 41.425 | 45.938 |
| O | 52.397 | 54.333 | 33.821 |
| H | 51.81  | 55.081 | 33.718 |
| H | 52.698 | 54.388 | 34.728 |
| O | 59.91  | 52.678 | 33.349 |
| H | 60.492 | 53.065 | 32.695 |
| H | 59.202 | 53.315 | 33.445 |
| O | 56.551 | 52.091 | 44.914 |
| H | 56.579 | 51.588 | 45.727 |
| H | 56.39  | 51.438 | 44.233 |
| O | 52.779 | 51.695 | 35.303 |
| H | 52.925 | 51.141 | 34.536 |
| H | 51.869 | 51.981 | 35.222 |
| O | 43.025 | 62.905 | 22.288 |
| H | 43.103 | 62.288 | 23.015 |
| H | 43.133 | 62.367 | 21.503 |
| O | 47.549 | 52.635 | 34.227 |
| H | 47.807 | 52.032 | 33.529 |
| H | 48.371 | 53.033 | 34.515 |

|   |        |        |        |
|---|--------|--------|--------|
| O | 47.269 | 63.468 | 48.18  |
| H | 47.315 | 64.093 | 48.903 |
| H | 47.026 | 62.64  | 48.594 |
| O | 57.32  | 62.158 | 49.2   |
| H | 56.46  | 62.345 | 49.577 |
| H | 57.17  | 61.41  | 48.622 |
| O | 50.138 | 54.108 | 41.88  |
| H | 50.455 | 54.553 | 42.666 |
| H | 49.232 | 54.402 | 41.786 |
| O | 48.88  | 58.782 | 28.969 |
| H | 48.763 | 58.477 | 28.069 |
| H | 47.989 | 58.887 | 29.304 |
| O | 46.91  | 50.292 | 54.036 |
| H | 46.159 | 50.209 | 53.448 |
| H | 46.528 | 50.537 | 54.879 |
| O | 51.78  | 56.944 | 23.698 |
| H | 52.532 | 57.526 | 23.588 |
| H | 52.042 | 56.13  | 23.269 |
| O | 53.569 | 54.212 | 36.292 |
| H | 53.638 | 53.401 | 35.787 |
| H | 53.02  | 53.981 | 37.041 |
| O | 50.478 | 53.202 | 45.287 |
| H | 50.423 | 54.031 | 44.812 |
| H | 49.745 | 52.685 | 44.953 |
| O | 55.338 | 60.654 | 42.152 |
| H | 54.479 | 60.672 | 41.73  |
| H | 55.85  | 60.037 | 41.629 |
| O | 62.244 | 56.245 | 47.231 |
| H | 61.334 | 55.955 | 47.3   |
| H | 62.225 | 56.939 | 46.571 |
| O | 53.098 | 50.23  | 27.048 |
| H | 52.205 | 50.209 | 27.393 |
| H | 53.178 | 51.093 | 26.643 |
| O | 49.169 | 46.606 | 46.367 |
| H | 49.747 | 47.369 | 46.374 |
| H | 48.793 | 46.599 | 45.487 |
| O | 51.243 | 45.305 | 23.135 |
| H | 51.73  | 44.585 | 23.534 |
| H | 50.339 | 44.992 | 23.097 |
| O | 58.197 | 57.41  | 35.548 |
| H | 57.507 | 56.976 | 35.046 |
| H | 58.71  | 56.691 | 35.92  |
| O | 53.796 | 60.954 | 38.082 |
| H | 52.986 | 61.278 | 38.478 |
| H | 53.701 | 60.002 | 38.088 |
| O | 55.622 | 56.817 | 38.928 |
| H | 56.138 | 56.873 | 38.124 |

|   |        |        |        |
|---|--------|--------|--------|
| H | 54.714 | 56.892 | 38.636 |
| O | 43.497 | 55.577 | 41.409 |
| H | 42.642 | 55.172 | 41.265 |
| H | 43.592 | 55.604 | 42.361 |
| O | 39.27  | 53.601 | 36.73  |
| H | 39.316 | 52.756 | 37.179 |
| H | 40.095 | 53.661 | 36.249 |
| O | 50.419 | 50.499 | 27.707 |
| H | 49.931 | 49.895 | 28.267 |
| H | 49.979 | 50.448 | 26.859 |
| O | 47.779 | 52.154 | 26.702 |
| H | 47.786 | 52.265 | 27.653 |
| H | 47.472 | 51.258 | 26.567 |
| O | 53.345 | 47.169 | 44.538 |
| H | 54.012 | 47.606 | 45.069 |
| H | 53.832 | 46.789 | 43.807 |
| O | 49.333 | 51.066 | 42.08  |
| H | 49.146 | 51.979 | 41.864 |
| H | 48.961 | 50.567 | 41.353 |
| O | 56.543 | 50.162 | 46.801 |
| H | 55.924 | 50.43  | 47.48  |
| H | 56.207 | 49.321 | 46.489 |
| O | 51.475 | 51.369 | 47.446 |
| H | 51.036 | 52.069 | 46.963 |
| H | 52.406 | 51.584 | 47.384 |
| O | 55.372 | 43.743 | 36.985 |
| H | 55.438 | 43.275 | 36.152 |
| H | 55.549 | 43.077 | 37.649 |
| O | 49.762 | 47.998 | 38.738 |
| H | 49.332 | 48.149 | 39.579 |
| H | 49.052 | 47.752 | 38.146 |
| O | 50.395 | 56.283 | 40.077 |
| H | 50.113 | 55.592 | 40.675 |
| H | 51.224 | 55.966 | 39.718 |
| O | 52.685 | 57.978 | 32.977 |
| H | 52.192 | 57.419 | 32.378 |
| H | 52.537 | 57.594 | 33.841 |
| O | 53.978 | 46.548 | 30.4   |
| H | 54.787 | 46.665 | 30.897 |
| H | 54.054 | 47.162 | 29.669 |
| O | 55.938 | 45.052 | 49.218 |
| H | 56.516 | 44.626 | 49.851 |
| H | 55.114 | 44.569 | 49.283 |
| O | 49.578 | 55.894 | 22.333 |
| H | 49.939 | 55.039 | 22.096 |
| H | 50.24  | 56.283 | 22.905 |
| O | 47.23  | 58.499 | 14.516 |

|   |        |        |        |
|---|--------|--------|--------|
| H | 47.788 | 58.875 | 13.836 |
| H | 47.292 | 59.116 | 15.245 |
| O | 51.558 | 55.022 | 13.191 |
| H | 52.166 | 55.524 | 13.734 |
| H | 51.471 | 55.539 | 12.39  |
| O | 46.092 | 61.619 | 19.584 |
| H | 45.74  | 62.439 | 19.237 |
| H | 46.821 | 61.889 | 20.142 |
| O | 49.865 | 52.817 | 21.111 |
| H | 48.935 | 53.027 | 21.023 |
| H | 49.913 | 52.269 | 21.895 |
| O | 60.488 | 53.653 | 16.726 |
| H | 60.194 | 54.215 | 16.009 |
| H | 60.583 | 52.787 | 16.329 |
| O | 54.215 | 56.393 | 13.175 |
| H | 53.827 | 57.267 | 13.126 |
| H | 54.049 | 56.008 | 12.314 |
| O | 54.99  | 48.913 | 17.816 |
| H | 54.044 | 48.799 | 17.724 |
| H | 55.104 | 49.266 | 18.698 |
| O | 55.06  | 59.097 | 19.452 |
| H | 54.45  | 58.665 | 18.854 |
| H | 54.509 | 59.669 | 19.986 |
| O | 56.863 | 49.394 | 32.762 |
| H | 56.514 | 48.503 | 32.747 |
| H | 56.592 | 49.772 | 31.926 |
| O | 54.422 | 47.877 | 27.869 |
| H | 54.904 | 47.583 | 27.095 |
| H | 53.96  | 48.663 | 27.578 |
| O | 57.694 | 57.012 | 21.959 |
| H | 57.054 | 57.104 | 22.665 |
| H | 57.172 | 57.034 | 21.157 |
| O | 57.517 | 60.014 | 21.918 |
| H | 56.888 | 60.723 | 22.057 |
| H | 56.998 | 59.214 | 22.002 |
| O | 53.79  | 52.342 | 13.174 |
| H | 53.902 | 52.824 | 13.994 |
| H | 53.231 | 52.905 | 12.639 |
| O | 60.342 | 57.876 | 22.118 |
| H | 59.422 | 57.621 | 22.18  |
| H | 60.545 | 58.252 | 22.975 |
| O | 52.266 | 54.464 | 22.913 |
| H | 52.456 | 54.218 | 22.008 |
| H | 53.021 | 54.149 | 23.41  |
| O | 46.704 | 55.335 | 27.2   |
| H | 46.966 | 54.853 | 26.416 |
| H | 45.754 | 55.223 | 27.245 |

|   |        |        |        |
|---|--------|--------|--------|
| O | 48.19  | 56.135 | 17.538 |
| H | 47.686 | 56.014 | 18.343 |
| H | 47.574 | 55.926 | 16.836 |
| O | 46.123 | 55.968 | 19.266 |
| H | 45.756 | 55.678 | 18.431 |
| H | 45.51  | 55.64  | 19.924 |
| O | 53.834 | 60.47  | 16.942 |
| H | 53.392 | 60.769 | 16.147 |
| H | 54.2   | 59.618 | 16.707 |
| O | 55.951 | 47.463 | 25.694 |
| H | 55.944 | 47.166 | 24.784 |
| H | 56.817 | 47.217 | 26.019 |
| O | 56.65  | 53.035 | 19.354 |
| H | 56.377 | 53.788 | 19.879 |
| H | 57.52  | 53.272 | 19.031 |
| O | 57.655 | 51.197 | 21.175 |
| H | 57.257 | 51.868 | 20.62  |
| H | 57.976 | 51.676 | 21.938 |
| O | 55.487 | 55.655 | 19.681 |
| H | 54.82  | 56.284 | 19.958 |
| H | 55.031 | 55.075 | 19.071 |
| O | 59.529 | 53.288 | 29.771 |
| H | 60.049 | 53.884 | 30.309 |
| H | 58.728 | 53.146 | 30.275 |
| O | 54.012 | 54.18  | 15.243 |
| H | 53.725 | 54.531 | 16.086 |
| H | 54.172 | 54.954 | 14.703 |
| O | 50.95  | 48.27  | 24.848 |
| H | 50.822 | 47.563 | 25.48  |
| H | 50.074 | 48.452 | 24.509 |
| O | 57.909 | 50.022 | 24.958 |
| H | 57.405 | 50.036 | 25.773 |
| H | 57.943 | 50.938 | 24.683 |
| O | 51.761 | 50.447 | 18.433 |
| H | 52.097 | 49.991 | 17.661 |
| H | 51.21  | 51.144 | 18.078 |
| O | 53.545 | 46.608 | 14.264 |
| H | 53.138 | 47.174 | 13.609 |
| H | 54.476 | 46.614 | 14.04  |
| O | 53.077 | 56.454 | 20.655 |
| H | 52.922 | 55.564 | 20.337 |
| H | 52.709 | 57.019 | 19.975 |
| O | 52.169 | 60.237 | 25.364 |
| H | 52.977 | 60.589 | 24.991 |
| H | 52.463 | 59.587 | 26.003 |
| O | 56.155 | 59.311 | 24.393 |
| H | 56.979 | 59.798 | 24.377 |

|   |        |        |        |
|---|--------|--------|--------|
| H | 55.731 | 59.585 | 25.207 |
| O | 50.704 | 49.63  | 9.644  |
| H | 49.847 | 49.287 | 9.391  |
| H | 50.968 | 50.183 | 8.908  |
| O | 58.72  | 59.475 | 9.408  |
| H | 59.099 | 59.497 | 10.287 |
| H | 57.96  | 60.055 | 9.461  |
| O | 55.9   | 62.592 | 21.045 |
| H | 55.919 | 63.531 | 21.228 |
| H | 55.944 | 62.533 | 20.091 |
| O | 63.1   | 45.14  | 16.156 |
| H | 63.486 | 44.726 | 16.927 |
| H | 62.818 | 44.408 | 15.607 |
| O | 51.282 | 56.887 | 28.795 |
| H | 51.183 | 56.228 | 28.108 |
| H | 50.398 | 57.231 | 28.926 |
| O | 52.23  | 49.419 | 15.943 |
| H | 52.449 | 49.598 | 15.028 |
| H | 51.863 | 48.536 | 15.934 |
| O | 56.147 | 50.732 | 26.758 |
| H | 55.375 | 50.167 | 26.804 |
| H | 55.858 | 51.563 | 27.136 |
| O | 48.621 | 61.668 | 20.874 |
| H | 48.819 | 61.654 | 19.938 |
| H | 49.467 | 61.528 | 21.299 |
| O | 50.979 | 60.455 | 22.228 |
| H | 50.586 | 59.736 | 21.732 |
| H | 50.805 | 60.236 | 23.144 |
| O | 57.152 | 60.099 | 31.95  |
| H | 56.245 | 60.353 | 32.123 |
| H | 57.551 | 60.031 | 32.818 |
| O | 42.51  | 59.369 | 9.171  |
| H | 43.355 | 58.963 | 8.981  |
| H | 42.04  | 59.345 | 8.337  |
| O | 58.164 | 63.4   | 24.294 |
| H | 58.858 | 63.589 | 23.661 |
| H | 57.409 | 63.895 | 23.976 |
| O | 55.126 | 48.604 | 22.907 |
| H | 54.597 | 48.107 | 23.531 |
| H | 55.989 | 48.663 | 23.318 |
| O | 47.681 | 48.346 | 15.923 |
| H | 47.683 | 49.303 | 15.955 |
| H | 46.912 | 48.092 | 16.435 |
| O | 52.305 | 61.402 | 14.816 |
| H | 51.803 | 60.587 | 14.791 |
| H | 51.714 | 62.058 | 14.446 |
| O | 55.435 | 49.486 | 20.277 |

|   |        |        |        |
|---|--------|--------|--------|
| H | 56.132 | 50.115 | 20.463 |
| H | 55.248 | 49.078 | 21.123 |
| O | 50.777 | 54.642 | 19.227 |
| H | 50.283 | 55.431 | 19.448 |
| H | 50.672 | 54.072 | 19.989 |
| O | 52.079 | 45.664 | 10.712 |
| H | 52.445 | 45.306 | 11.521 |
| H | 52.114 | 46.613 | 10.834 |
| O | 55.164 | 59.819 | 11.254 |
| H | 55.877 | 59.654 | 11.87  |
| H | 55.597 | 60.158 | 10.471 |
| O | 56.293 | 52.536 | 5.079  |
| H | 56.895 | 51.898 | 5.461  |
| H | 56.228 | 52.283 | 4.158  |
| O | 46.982 | 60.671 | 32.894 |
| H | 46.368 | 60.014 | 33.221 |
| H | 47.319 | 61.097 | 33.682 |
| O | 53.664 | 58.967 | 23.368 |
| H | 53.503 | 59.236 | 22.464 |
| H | 54.591 | 59.16  | 23.514 |
| O | 42.331 | 53.051 | 28.591 |
| H | 42.186 | 53.841 | 28.07  |
| H | 41.495 | 52.585 | 28.557 |
| O | 54.747 | 58.152 | 15.838 |
| H | 54.705 | 58.512 | 14.952 |
| H | 55.681 | 58.006 | 15.992 |
| O | 54.583 | 56.164 | 31.268 |
| H | 53.7   | 55.816 | 31.393 |
| H | 54.464 | 56.915 | 30.687 |
| O | 60.412 | 58.217 | 7.831  |
| H | 59.723 | 58.703 | 8.285  |
| H | 59.99  | 57.404 | 7.554  |
| O | 52.634 | 53.096 | 27.848 |
| H | 52.348 | 53.901 | 27.417 |
| H | 51.924 | 52.883 | 28.454 |
| O | 55.745 | 53.528 | 26.927 |
| H | 55.354 | 53.907 | 27.714 |
| H | 55.014 | 53.435 | 26.317 |
| O | 62.94  | 53.583 | 29.403 |
| H | 63.754 | 53.264 | 29.793 |
| H | 63.221 | 54.073 | 28.63  |
| O | 62.236 | 54.81  | 25.491 |
| H | 62.099 | 53.892 | 25.254 |
| H | 62.059 | 55.295 | 24.685 |
| O | 58.562 | 53.637 | 9.197  |
| H | 58.282 | 52.803 | 8.82   |
| H | 59.449 | 53.47  | 9.516  |

|   |        |        |        |
|---|--------|--------|--------|
| O | 56.132 | 46.606 | 32.443 |
| H | 56.761 | 45.972 | 32.098 |
| H | 55.374 | 46.078 | 32.696 |
| O | 53.503 | 54.892 | 18.071 |
| H | 52.895 | 55.355 | 17.494 |
| H | 52.963 | 54.234 | 18.509 |
| O | 56.1   | 51.866 | 16.173 |
| H | 55.372 | 51.541 | 16.702 |
| H | 56.087 | 52.814 | 16.305 |
| O | 49.201 | 61.827 | 18.302 |
| H | 50.133 | 61.638 | 18.416 |
| H | 49.182 | 62.629 | 17.78  |
| O | 50.108 | 61.403 | 26.628 |
| H | 49.524 | 60.666 | 26.446 |
| H | 50.959 | 61.123 | 26.292 |
| O | 47.513 | 52.774 | 17.969 |
| H | 47.313 | 53.709 | 17.924 |
| H | 46.768 | 52.348 | 17.545 |
| O | 49.588 | 58.269 | 17.049 |
| H | 49.149 | 57.45  | 17.278 |
| H | 48.879 | 58.854 | 16.781 |
| O | 49.413 | 54.063 | 11.116 |
| H | 48.686 | 54.565 | 11.483 |
| H | 50.122 | 54.7   | 11.022 |
| O | 50.007 | 45.561 | 14.219 |
| H | 49.511 | 44.753 | 14.356 |
| H | 50.541 | 45.385 | 13.444 |
| O | 53.338 | 52.76  | 20.976 |
| H | 54.265 | 52.637 | 20.772 |
| H | 53.065 | 51.928 | 21.364 |
| O | 52.689 | 43.787 | 26.994 |
| H | 53.509 | 44.146 | 26.653 |
| H | 52.741 | 43.93  | 27.939 |
| O | 58.602 | 55.272 | 23.992 |
| H | 57.958 | 55.964 | 23.839 |
| H | 59.447 | 55.692 | 23.834 |
| O | 48.229 | 46.306 | 28.015 |
| H | 49.082 | 46.329 | 27.581 |
| H | 48.412 | 46.572 | 28.916 |
| O | 62.332 | 55.861 | 22.547 |
| H | 62.471 | 55.156 | 21.914 |
| H | 62.6   | 56.655 | 22.083 |
| O | 54.883 | 54.728 | 10.228 |
| H | 55.748 | 54.621 | 10.624 |
| H | 55.005 | 55.408 | 9.566  |
| O | 59.707 | 43.815 | 16.17  |
| H | 59.101 | 44.33  | 16.702 |



|   |        |        |        |
|---|--------|--------|--------|
| H | 59.556 | 42.91  | 16.443 |
| O | 52.089 | 42.198 | 14.437 |
| H | 51.591 | 41.468 | 14.068 |
| H | 52.944 | 41.822 | 14.649 |
| O | 53.322 | 41.322 | 11.301 |
| H | 52.689 | 40.669 | 11.004 |
| H | 53.234 | 42.042 | 10.676 |
| O | 49.195 | 50.855 | 32.463 |
| H | 50.15  | 50.793 | 32.456 |
| H | 48.912 | 50.28  | 31.752 |
| O | 55.633 | 45.383 | 0.964  |
| H | 55.958 | 44.483 | 0.934  |
| H | 54.718 | 45.298 | 1.233  |
| O | 44.018 | 63.473 | -4.279 |
| H | 43.872 | 62.559 | -4.035 |
| H | 44.188 | 63.919 | -3.449 |
| O | 48.274 | 59.995 | 2.27   |
| H | 48.387 | 59.206 | 1.74   |
| H | 48.098 | 60.688 | 1.634  |
| O | 48.434 | 52.158 | 4.649  |
| H | 48.98  | 52.422 | 5.39   |
| H | 48.807 | 52.621 | 3.899  |
| O | 55.037 | 49.223 | 7.685  |
| H | 54.282 | 48.769 | 8.06   |
| H | 55.022 | 50.089 | 8.093  |
| O | 45.515 | 49.545 | -1.104 |
| H | 45.57  | 50.312 | -1.675 |
| H | 44.578 | 49.438 | -0.938 |
| O | 61.626 | 50.176 | -4.794 |
| H | 61.382 | 51.083 | -4.609 |
| H | 61.396 | 50.049 | -5.715 |
| O | 54.522 | 52.503 | 0.996  |
| H | 54.171 | 51.665 | 0.693  |
| H | 55.431 | 52.312 | 1.227  |
| O | 48.158 | 48.853 | 7.892  |
| H | 47.963 | 48.874 | 6.955  |
| H | 47.324 | 48.632 | 8.306  |
| O | 52.827 | 45.641 | -1.287 |
| H | 52.936 | 44.732 | -1.565 |
| H | 52.287 | 45.586 | -0.498 |
| O | 54.056 | 57.371 | -0.383 |
| H | 53.572 | 57.804 | -1.086 |
| H | 53.741 | 57.79  | 0.418  |
| O | 57.637 | 48.959 | -0.24  |
| H | 57.084 | 48.644 | 0.475  |
| H | 58.491 | 48.56  | -0.075 |
| O | 59.324 | 55.701 | 7.693  |

|   |        |        |        |
|---|--------|--------|--------|
| H | 59.846 | 55.347 | 6.973  |
| H | 59.008 | 54.928 | 8.162  |
| O | 47.904 | 52.318 | -2.11  |
| H | 48.098 | 52.925 | -2.825 |
| H | 48.436 | 51.545 | -2.301 |
| O | 49.685 | 42.931 | 5.052  |
| H | 50.472 | 43.439 | 4.858  |
| H | 49.406 | 42.587 | 4.204  |
| O | 58.794 | 51.296 | 5.739  |
| H | 59.1   | 50.686 | 5.068  |
| H | 59.174 | 52.138 | 5.489  |
| O | 56.228 | 49.179 | 5.135  |
| H | 55.931 | 48.331 | 4.805  |
| H | 56.032 | 49.154 | 6.071  |
| O | 56.294 | 56.914 | 9.011  |
| H | 56.34  | 56.559 | 9.898  |
| H | 57.112 | 56.637 | 8.599  |
| O | 45.478 | 51.843 | 4.28   |
| H | 46.423 | 51.944 | 4.398  |
| H | 45.386 | 51.053 | 3.748  |
| O | 57.394 | 54.753 | 11.268 |
| H | 57.967 | 54.452 | 10.562 |
| H | 57.942 | 55.344 | 11.784 |
| O | 53.046 | 45.524 | 2.062  |
| H | 52.169 | 45.887 | 2.187  |
| H | 53.25  | 45.097 | 2.894  |
| O | 56.995 | 51.349 | 2.828  |
| H | 57.725 | 50.868 | 3.217  |
| H | 56.433 | 50.67  | 2.453  |
| O | 62.371 | 48.808 | 9.33   |
| H | 63.103 | 48.64  | 8.737  |
| H | 61.885 | 47.983 | 9.35   |
| O | 53.356 | 51.187 | 4      |
| H | 52.708 | 51.389 | 3.325  |
| H | 54.076 | 51.795 | 3.831  |
| O | 49.65  | 55.146 | 7.321  |
| H | 50.267 | 55.602 | 7.893  |
| H | 49.865 | 55.457 | 6.441  |
| O | 49.942 | 53.009 | 2.455  |
| H | 50.599 | 52.374 | 2.169  |
| H | 50.004 | 53.72  | 1.817  |
| O | 55.955 | 47.974 | 1.709  |
| H | 56.03  | 47.061 | 1.432  |
| H | 55.224 | 47.977 | 2.328  |
| O | 48.661 | 59.727 | -4.73  |
| H | 48.612 | 60.654 | -4.962 |
| H | 49.599 | 59.543 | -4.674 |

|   |        |        |        |
|---|--------|--------|--------|
| O | 54.105 | 53.899 | 5.31   |
| H | 55.012 | 53.594 | 5.331  |
| H | 53.591 | 53.141 | 5.588  |
| O | 56.465 | 52.778 | 12.922 |
| H | 55.514 | 52.676 | 12.96  |
| H | 56.605 | 53.492 | 12.301 |
| O | 43.297 | 55.684 | 13.353 |
| H | 43.119 | 56.597 | 13.126 |
| H | 43.726 | 55.323 | 12.577 |
| O | 50.121 | 52.173 | 7.502  |
| H | 50.67  | 52.912 | 7.763  |
| H | 49.321 | 52.276 | 8.018  |
| O | 50.618 | 63.411 | 10.805 |
| H | 51.027 | 64.276 | 10.839 |
| H | 51.334 | 62.816 | 10.58  |
| O | 59.304 | 56.573 | 11.533 |
| H | 59.346 | 57.524 | 11.432 |
| H | 60.187 | 56.27  | 11.321 |
| O | 46.78  | 53.789 | 8.159  |
| H | 47.556 | 54.197 | 7.774  |
| H | 47.118 | 53.025 | 8.626  |
| O | 48.047 | 57.422 | 4.673  |
| H | 47.802 | 57.19  | 3.777  |
| H | 48.827 | 57.967 | 4.575  |
| O | 53.512 | 45.306 | 6.797  |
| H | 54.421 | 45.027 | 6.903  |
| H | 53.555 | 46.262 | 6.779  |
| O | 61.339 | 46.806 | 2.42   |
| H | 60.535 | 46.378 | 2.712  |
| H | 62.02  | 46.453 | 2.993  |
| O | 60.766 | 60.127 | 16.055 |
| H | 61.352 | 59.557 | 15.557 |
| H | 61.082 | 60.066 | 16.957 |
| O | 51.638 | 59.227 | -0.286 |
| H | 51.749 | 59.845 | 0.436  |
| H | 51.022 | 58.575 | 0.049  |
| O | 55.149 | 51.786 | 9.415  |
| H | 55.036 | 52.703 | 9.665  |
| H | 56.022 | 51.75  | 9.023  |
| O | 52.174 | 65.932 | -2.657 |
| H | 52.87  | 66.141 | -3.279 |
| H | 51.924 | 65.033 | -2.871 |
| O | 44.743 | 59.711 | 5.747  |
| H | 44.964 | 60.42  | 5.143  |
| H | 43.841 | 59.894 | 6.012  |
| O | 43.047 | 54.867 | 3.302  |
| H | 42.459 | 54.127 | 3.149  |

|   |        |        |        |
|---|--------|--------|--------|
| H | 43.914 | 54.536 | 3.068  |
| O | 53.579 | 39.454 | 3.74   |
| H | 52.914 | 38.94  | 3.283  |
| H | 53.572 | 40.303 | 3.298  |
| O | 46.935 | 46.751 | 10.284 |
| H | 47.875 | 46.668 | 10.445 |
| H | 46.766 | 46.164 | 9.547  |
| O | 55.573 | 41.453 | 12.587 |
| H | 55.302 | 41.745 | 13.457 |
| H | 54.81  | 41.616 | 12.032 |
| O | 44.046 | 40.497 | 3.132  |
| H | 43.945 | 41.442 | 3.014  |
| H | 44.875 | 40.402 | 3.601  |
| O | 55.964 | 47.894 | 11.051 |
| H | 55.531 | 48.745 | 11.117 |
| H | 56.174 | 47.661 | 11.955 |
| O | 49.974 | 47.045 | 16.747 |
| H | 50.014 | 46.379 | 16.06  |
| H | 49.319 | 47.67  | 16.435 |
| O | 57.167 | 42.018 | 56.331 |
| H | 56.539 | 41.394 | 55.966 |
| H | 57.165 | 41.837 | 57.271 |
| O | 55.581 | 39.884 | 55.589 |
| H | 54.66  | 40.011 | 55.361 |
| H | 55.881 | 39.195 | 54.995 |
| O | 51.098 | 41.972 | 61.625 |
| H | 52.04  | 41.823 | 61.538 |
| H | 50.756 | 41.866 | 60.737 |
| O | 42.582 | 29.364 | 48.227 |
| H | 42.355 | 28.438 | 48.311 |
| H | 42.999 | 29.431 | 47.368 |
| O | 46.118 | 40.467 | 55.862 |
| H | 45.982 | 39.973 | 56.671 |
| H | 46.301 | 39.8   | 55.201 |
| O | 63.633 | 49.852 | 57.519 |
| H | 63.179 | 50.204 | 58.285 |
| H | 64.155 | 50.584 | 57.193 |
| O | 60.557 | 39.045 | 57.166 |
| H | 60.671 | 39.886 | 56.725 |
| H | 60.483 | 39.269 | 58.094 |
| O | 60.119 | 32.218 | 58.653 |
| H | 59.645 | 31.771 | 57.951 |
| H | 59.498 | 32.247 | 59.381 |
| O | 51.512 | 33.131 | 49.466 |
| H | 52.121 | 32.394 | 49.417 |
| H | 51.53  | 33.396 | 50.386 |
| O | 49.418 | 37.74  | 65.323 |

|   |        |        |        |
|---|--------|--------|--------|
| H | 50.336 | 37.963 | 65.479 |
| H | 49.301 | 37.855 | 64.38  |
| O | 53.342 | 32.665 | 56.553 |
| H | 53.791 | 32.861 | 55.731 |
| H | 54.031 | 32.337 | 57.131 |
| O | 54.764 | 33.189 | 54.341 |
| H | 54.605 | 32.585 | 53.616 |
| H | 55.718 | 33.231 | 54.412 |
| O | 50.36  | 42.25  | 55.499 |
| H | 50.061 | 42.348 | 54.595 |
| H | 49.574 | 42.389 | 56.028 |
| O | 50.598 | 32.564 | 56.522 |
| H | 51.546 | 32.444 | 56.474 |
| H | 50.48  | 33.51  | 56.609 |
| O | 56.858 | 40.072 | 52.014 |
| H | 57.414 | 40.28  | 52.765 |
| H | 55.991 | 40.393 | 52.262 |
| O | 56.435 | 29.892 | 41.291 |
| H | 56.983 | 29.964 | 42.073 |
| H | 57.049 | 29.681 | 40.588 |
| O | 52.359 | 42.969 | 57.667 |
| H | 52.858 | 42.221 | 57.997 |
| H | 52.004 | 42.669 | 56.83  |
| O | 51.547 | 49.344 | 57.41  |
| H | 52.028 | 48.942 | 56.686 |
| H | 51.614 | 50.285 | 57.249 |
| O | 60.262 | 40.078 | 59.532 |
| H | 60.725 | 39.67  | 60.264 |
| H | 60.013 | 40.943 | 59.858 |
| O | 47.41  | 35.463 | 53.466 |
| H | 47.075 | 35.746 | 54.317 |
| H | 47.03  | 34.594 | 53.336 |
| O | 48.683 | 41.1   | 66.041 |
| H | 48.958 | 41.753 | 65.397 |
| H | 49.499 | 40.803 | 66.444 |
| O | 49.211 | 39.964 | 52.86  |
| H | 49.458 | 39.216 | 53.404 |
| H | 48.824 | 39.573 | 52.076 |
| O | 52.444 | 42.094 | 51.143 |
| H | 51.502 | 42.25  | 51.067 |
| H | 52.564 | 41.197 | 50.833 |
| O | 47.335 | 24.919 | 57.704 |
| H | 47.988 | 24.72  | 57.033 |
| H | 46.502 | 24.931 | 57.232 |
| O | 62.569 | 32.852 | 54.997 |
| H | 63.26  | 32.331 | 54.588 |
| H | 62.533 | 33.654 | 54.475 |

|   |        |        |        |
|---|--------|--------|--------|
| O | 53.891 | 36.043 | 58.891 |
| H | 53.262 | 36.281 | 58.21  |
| H | 54.615 | 35.635 | 58.417 |
| O | 52.837 | 29.636 | 56.032 |
| H | 53.725 | 29.339 | 55.834 |
| H | 52.91  | 30.589 | 56.09  |
| O | 58.732 | 36.625 | 53.763 |
| H | 59.145 | 36.889 | 52.941 |
| H | 59.44  | 36.653 | 54.407 |
| O | 53.55  | 26.921 | 56.908 |
| H | 52.785 | 27.408 | 56.602 |
| H | 53.647 | 27.179 | 57.824 |
| O | 39.261 | 34.68  | 43.635 |
| H | 38.852 | 34.705 | 44.501 |
| H | 38.985 | 35.495 | 43.216 |
| O | 55.693 | 30.228 | 53.841 |
| H | 55.858 | 29.6   | 53.137 |
| H | 55.827 | 29.726 | 54.645 |
| O | 56.08  | 37.701 | 53.84  |
| H | 56.974 | 37.365 | 53.791 |
| H | 55.954 | 38.169 | 53.014 |
| O | 41.084 | 39.811 | 50.844 |
| H | 41.054 | 39.813 | 51.801 |
| H | 41.494 | 38.976 | 50.62  |
| O | 54.876 | 32.017 | 47.559 |
| H | 54.161 | 31.941 | 46.927 |
| H | 55.652 | 32.183 | 47.025 |
| O | 51.462 | 37.243 | 51.013 |
| H | 51.719 | 36.768 | 50.222 |
| H | 50.525 | 37.069 | 51.103 |
| O | 44.438 | 25.294 | 53.732 |
| H | 45.378 | 25.136 | 53.81  |
| H | 44.251 | 25.175 | 52.801 |
| O | 63.113 | 36.919 | 51.505 |
| H | 62.629 | 36.836 | 50.683 |
| H | 63.871 | 37.46  | 51.284 |
| O | 53.084 | 30.842 | 52.807 |
| H | 52.896 | 29.955 | 52.5   |
| H | 53.996 | 30.807 | 53.096 |
| O | 50.221 | 45.444 | 59.012 |
| H | 50.312 | 45.39  | 58.061 |
| H | 50.139 | 46.38  | 59.192 |
| O | 58.646 | 40.61  | 54.048 |
| H | 58.451 | 41.037 | 54.883 |
| H | 59.379 | 41.11  | 53.689 |
| O | 57.797 | 43.828 | 51.374 |
| H | 58.636 | 44.142 | 51.714 |

|   |        |        |        |
|---|--------|--------|--------|
| H | 57.321 | 43.531 | 52.15  |
| O | 43.029 | 42.034 | 50.358 |
| H | 42.829 | 42.592 | 49.606 |
| H | 42.449 | 41.279 | 50.256 |
| O | 58.991 | 38.155 | 49.114 |
| H | 58.054 | 38.029 | 48.966 |
| H | 59.058 | 38.384 | 50.042 |
| O | 47.09  | 35.393 | 49.56  |
| H | 47.755 | 35.643 | 50.202 |
| H | 47.525 | 34.745 | 49.005 |
| O | 50.216 | 45.645 | 56.244 |
| H | 49.947 | 45.513 | 55.335 |
| H | 51.171 | 45.705 | 56.205 |
| O | 53.288 | 39.759 | 45.219 |
| H | 52.67  | 40.457 | 45     |
| H | 54.127 | 40.066 | 44.875 |
| O | 55.089 | 36.85  | 45.189 |
| H | 54.22  | 36.549 | 44.922 |
| H | 55.247 | 36.411 | 46.025 |
| O | 57.011 | 44.193 | 43.268 |
| H | 57.799 | 44.723 | 43.143 |
| H | 56.758 | 44.352 | 44.178 |
| O | 45.629 | 41.136 | 52.628 |
| H | 44.852 | 41.288 | 53.165 |
| H | 46.286 | 40.81  | 53.245 |
| O | 51.117 | 43.554 | 47.461 |
| H | 50.188 | 43.561 | 47.692 |
| H | 51.149 | 43.113 | 46.611 |
| O | 58.115 | 28.257 | 45.698 |
| H | 58.804 | 27.934 | 46.278 |
| H | 57.319 | 28.221 | 46.228 |
| O | 60.975 | 42.78  | 53.796 |
| H | 61.584 | 42.758 | 53.059 |
| H | 60.561 | 43.642 | 53.74  |
| O | 58.235 | 35.031 | 47.171 |
| H | 57.433 | 34.871 | 47.668 |
| H | 58.766 | 34.248 | 47.312 |
| O | 48.662 | 49.787 | 56.519 |
| H | 48.618 | 49.811 | 55.563 |
| H | 49.265 | 49.07  | 56.714 |
| O | 49.373 | 42.702 | 52.918 |
| H | 49.346 | 42.793 | 51.966 |
| H | 49.096 | 41.801 | 53.082 |
| O | 55.38  | 47.551 | 46.762 |
| H | 55.047 | 47.493 | 47.657 |
| H | 55.967 | 46.8   | 46.675 |
| O | 55.918 | 34.63  | 50.075 |

|   |        |        |        |
|---|--------|--------|--------|
| H | 55.373 | 35.254 | 50.555 |
| H | 55.62  | 34.699 | 49.168 |
| O | 61.14  | 38.218 | 44.895 |
| H | 61.585 | 38.89  | 44.379 |
| H | 61.263 | 38.492 | 45.804 |
| O | 64.931 | 41.712 | 51.173 |
| H | 65.457 | 42.189 | 51.816 |
| H | 64.036 | 42.015 | 51.325 |
| O | 50.364 | 38.572 | 46.128 |
| H | 50.825 | 37.941 | 45.576 |
| H | 49.638 | 38.88  | 45.585 |
| O | 48.415 | 30.724 | 47.192 |
| H | 48.235 | 30.477 | 46.285 |
| H | 48.937 | 30     | 47.538 |
| O | 52.569 | 39.647 | 49.929 |
| H | 52.741 | 39.341 | 49.038 |
| H | 52.093 | 38.927 | 50.341 |
| O | 57.681 | 32.172 | 46.241 |
| H | 58.465 | 32.589 | 45.882 |
| H | 57.152 | 31.956 | 45.473 |
| O | 64.226 | 44.212 | 53.668 |
| H | 64.925 | 43.68  | 53.289 |
| H | 64.346 | 44.126 | 54.614 |
| O | 46.762 | 40.645 | 48.034 |
| H | 46.549 | 39.719 | 47.921 |
| H | 47.702 | 40.697 | 47.86  |
| O | 46.934 | 42.866 | 61.435 |
| H | 47.353 | 42.231 | 62.016 |
| H | 47.613 | 43.52  | 61.265 |
| O | 62.562 | 39.95  | 61.504 |
| H | 63.272 | 39.764 | 60.89  |
| H | 62.268 | 39.088 | 61.799 |
| O | 47.81  | 39.309 | 50.473 |
| H | 47.988 | 38.673 | 49.78  |
| H | 46.856 | 39.382 | 50.492 |
| O | 46.664 | 38.354 | 54.536 |
| H | 47.562 | 38.167 | 54.263 |
| H | 46.15  | 38.286 | 53.731 |
| O | 45.744 | 33.444 | 42.041 |
| H | 45.848 | 34.34  | 42.362 |
| H | 45.648 | 32.915 | 42.833 |
| O | 45.311 | 26.25  | 47.046 |
| H | 44.37  | 26.227 | 46.87  |
| H | 45.455 | 27.096 | 47.47  |
| O | 47.834 | 31.409 | 54.709 |
| H | 47.454 | 31.908 | 55.432 |
| H | 47.079 | 31.043 | 54.248 |



|   |        |        |        |
|---|--------|--------|--------|
| O | 49.844 | 45.279 | 53.685 |
| H | 49.574 | 44.388 | 53.465 |
| H | 50.452 | 45.525 | 52.987 |
| O | 51.919 | 44.728 | 63.814 |
| H | 51.217 | 45.216 | 64.244 |
| H | 52.665 | 44.808 | 64.407 |
| O | 58.269 | 35.902 | 61.62  |
| H | 57.718 | 36.682 | 61.552 |
| H | 58.38  | 35.768 | 62.561 |
| O | 51.859 | 52.463 | 58.061 |
| H | 51.306 | 53.21  | 57.83  |
| H | 52.751 | 52.81  | 58.042 |
| O | 49.55  | 28.079 | 47.41  |
| H | 50.442 | 27.784 | 47.227 |
| H | 48.997 | 27.337 | 47.163 |
| O | 42.791 | 35.797 | 53.067 |
| H | 42.449 | 35.021 | 53.51  |
| H | 43.24  | 35.454 | 52.294 |
| O | 55.595 | 49.949 | 54.977 |
| H | 55.26  | 49.578 | 55.793 |
| H | 54.882 | 49.833 | 54.35  |
| O | 50.142 | 25.102 | 52.99  |
| H | 49.76  | 24.925 | 52.13  |
| H | 51.079 | 25.198 | 52.82  |
| O | 49.223 | 37.496 | 57.301 |
| H | 49.569 | 38.171 | 57.885 |
| H | 48.331 | 37.343 | 57.614 |
| O | 53.013 | 50.957 | 55.4   |
| H | 53.166 | 50.125 | 54.952 |
| H | 52.435 | 51.443 | 54.811 |
| O | 46.888 | 42.195 | 50.618 |
| H | 46.575 | 41.769 | 49.82  |
| H | 46.771 | 41.536 | 51.302 |
| O | 60.092 | 40.122 | 33.35  |
| H | 60.278 | 40.621 | 34.146 |
| H | 59.997 | 39.218 | 33.651 |
| O | 52.47  | 40.163 | 35.234 |
| H | 53.013 | 40.951 | 35.194 |
| H | 53.074 | 39.446 | 35.041 |
| O | 52.897 | 47.977 | 40.968 |
| H | 53.45  | 47.433 | 41.528 |
| H | 52.696 | 47.42  | 40.216 |
| O | 50.67  | 35.757 | 27.486 |
| H | 50.673 | 36.111 | 28.376 |
| H | 50.033 | 36.296 | 27.016 |
| O | 40.484 | 42.661 | 40.566 |
| H | 40.462 | 41.79  | 40.963 |

|   |        |        |        |
|---|--------|--------|--------|
| H | 40.975 | 43.196 | 41.19  |
| O | 59.203 | 46.866 | 40.33  |
| H | 58.799 | 46.012 | 40.176 |
| H | 59.588 | 47.105 | 39.487 |
| O | 57.854 | 43.228 | 34.551 |
| H | 58.7   | 43.262 | 34.103 |
| H | 57.399 | 42.49  | 34.146 |
| O | 44.721 | 29.893 | 33.847 |
| H | 44.745 | 28.975 | 33.574 |
| H | 45.27  | 30.347 | 33.209 |
| O | 58.245 | 29.077 | 39.507 |
| H | 59.065 | 28.897 | 39.047 |
| H | 57.855 | 28.214 | 39.647 |
| O | 56.912 | 39.431 | 36.368 |
| H | 57.409 | 39.135 | 35.606 |
| H | 57.448 | 39.174 | 37.118 |
| O | 58.418 | 37.402 | 45.534 |
| H | 58.358 | 36.48  | 45.786 |
| H | 59.075 | 37.418 | 44.838 |
| O | 50.698 | 38.612 | 36.796 |
| H | 50.988 | 39.16  | 36.066 |
| H | 51.471 | 38.527 | 37.354 |
| O | 48.841 | 30.312 | 42.939 |
| H | 49.339 | 31.072 | 42.637 |
| H | 49.506 | 29.647 | 43.12  |
| O | 57.416 | 42.355 | 31.02  |
| H | 57.04  | 42.248 | 30.146 |
| H | 57.488 | 43.302 | 31.135 |
| O | 45.336 | 33.406 | 45.965 |
| H | 44.64  | 33.931 | 45.569 |
| H | 46.099 | 33.983 | 45.969 |
| O | 47.118 | 29.857 | 44.87  |
| H | 46.327 | 29.451 | 44.517 |
| H | 47.661 | 30.031 | 44.102 |
| O | 46.792 | 49.182 | 42.518 |
| H | 46.285 | 49.562 | 41.8   |
| H | 46.156 | 49.064 | 43.223 |
| O | 50.844 | 41.821 | 33.094 |
| H | 51.185 | 41.837 | 33.988 |
| H | 50.567 | 40.914 | 32.96  |
| O | 58.77  | 31.323 | 37.252 |
| H | 59.335 | 31.769 | 36.622 |
| H | 59.297 | 30.589 | 37.569 |
| O | 62.271 | 30.999 | 42.03  |
| H | 61.555 | 31.114 | 42.654 |
| H | 62.614 | 30.125 | 42.216 |
| O | 57.075 | 34.919 | 34.877 |

|   |        |        |        |
|---|--------|--------|--------|
| H | 57.35  | 34.155 | 34.37  |
| H | 56.391 | 35.326 | 34.344 |
| O | 58.25  | 39.074 | 38.649 |
| H | 58.875 | 38.805 | 39.322 |
| H | 57.806 | 39.835 | 39.026 |
| O | 47.417 | 42.298 | 40.594 |
| H | 48.136 | 42.028 | 40.023 |
| H | 46.844 | 42.817 | 40.03  |
| O | 61.506 | 34.462 | 37.379 |
| H | 61.694 | 33.772 | 38.015 |
| H | 60.556 | 34.432 | 37.266 |
| O | 58.178 | 42.94  | 37.189 |
| H | 59.087 | 43.152 | 36.98  |
| H | 57.714 | 43.023 | 36.356 |
| O | 52.197 | 37.941 | 41.829 |
| H | 52.973 | 37.577 | 41.404 |
| H | 52.24  | 38.879 | 41.643 |
| O | 53.869 | 35.998 | 40.694 |
| H | 53.724 | 35.103 | 40.387 |
| H | 54.818 | 36.064 | 40.802 |
| O | 56.129 | 38.994 | 49.501 |
| H | 55.604 | 38.371 | 50.004 |
| H | 56.547 | 39.545 | 50.163 |
| O | 54.805 | 32.482 | 38.096 |
| H | 54.298 | 33.222 | 37.763 |
| H | 54.303 | 31.71  | 37.834 |
| O | 48.165 | 45.063 | 36.806 |
| H | 48.998 | 44.637 | 36.609 |
| H | 47.518 | 44.568 | 36.304 |
| O | 49.2   | 39.775 | 32.858 |
| H | 48.714 | 39.415 | 32.116 |
| H | 48.705 | 39.496 | 33.628 |
| O | 50.758 | 46.322 | 27.203 |
| H | 51.463 | 46.878 | 27.535 |
| H | 51.19  | 45.5   | 26.971 |
| O | 52.427 | 40.383 | 40.901 |
| H | 53.182 | 40.962 | 41.01  |
| H | 52.193 | 40.467 | 39.977 |
| O | 53.72  | 30.458 | 41.203 |
| H | 54.661 | 30.285 | 41.206 |
| H | 53.351 | 29.772 | 40.648 |
| O | 53.529 | 38.489 | 37.995 |
| H | 53.929 | 38.435 | 38.863 |
| H | 54.171 | 38.087 | 37.41  |
| O | 52.681 | 34.485 | 32.306 |
| H | 52.313 | 33.84  | 31.702 |
| H | 51.931 | 34.789 | 32.817 |

|   |        |        |        |
|---|--------|--------|--------|
| O | 61.849 | 32.378 | 39.581 |
| H | 62.523 | 32.039 | 38.993 |
| H | 62.013 | 31.937 | 40.414 |
| O | 48.021 | 38.833 | 35.332 |
| H | 48.508 | 38.332 | 35.986 |
| H | 47.977 | 39.718 | 35.692 |
| O | 56.156 | 31.889 | 43.909 |
| H | 55.315 | 31.503 | 43.662 |
| H | 56.806 | 31.241 | 43.637 |
| O | 59.946 | 30.678 | 30.994 |
| H | 59.448 | 30.713 | 31.811 |
| H | 59.727 | 29.826 | 30.617 |
| O | 41.038 | 27.549 | 41.016 |
| H | 40.241 | 27.094 | 40.743 |
| H | 41.605 | 26.857 | 41.356 |
| O | 59.909 | 31.696 | 43.36  |
| H | 59.823 | 32.341 | 44.062 |
| H | 59.718 | 32.185 | 42.56  |
| O | 50.69  | 32.89  | 43.94  |
| H | 51.129 | 33.394 | 44.625 |
| H | 50.037 | 32.369 | 44.409 |
| O | 44.813 | 37.056 | 26.369 |
| H | 45.229 | 36.206 | 26.513 |
| H | 43.885 | 36.901 | 26.543 |
| O | 64.019 | 31.126 | 37.975 |
| H | 64.192 | 30.98  | 37.044 |
| H | 64.665 | 31.782 | 38.238 |
| O | 53.417 | 34.505 | 37.301 |
| H | 53.963 | 35.288 | 37.38  |
| H | 53.539 | 34.219 | 36.396 |
| O | 40.31  | 39.388 | 42.397 |
| H | 40.901 | 38.937 | 43     |
| H | 39.554 | 39.626 | 42.935 |
| O | 59.069 | 40.377 | 30.755 |
| H | 58.306 | 40.95  | 30.83  |
| H | 59.33  | 40.206 | 31.66  |
| O | 57.542 | 34.388 | 31.274 |
| H | 58.455 | 34.1   | 31.269 |
| H | 57.177 | 34.041 | 30.46  |
| O | 49.925 | 30.916 | 39.725 |
| H | 50.165 | 31.214 | 38.848 |
| H | 49.31  | 31.577 | 40.043 |
| O | 55.799 | 38.811 | 40.52  |
| H | 56.557 | 38.443 | 40.067 |
| H | 55.893 | 38.515 | 41.425 |
| O | 49.419 | 22.084 | 28.588 |
| H | 48.978 | 21.235 | 28.628 |

|   |        |        |        |
|---|--------|--------|--------|
| H | 48.817 | 22.687 | 29.024 |
| O | 46.937 | 37.165 | 45.191 |
| H | 46.208 | 37.029 | 44.587 |
| H | 47.286 | 38.025 | 44.955 |
| O | 48.343 | 46.9   | 34.61  |
| H | 48.249 | 47.851 | 34.679 |
| H | 49.21  | 46.718 | 34.97  |
| O | 51.292 | 34.301 | 39.58  |
| H | 51.732 | 34.364 | 38.732 |
| H | 51.384 | 33.382 | 39.831 |
| O | 53.403 | 50.262 | 52.284 |
| H | 52.574 | 49.844 | 52.05  |
| H | 53.846 | 50.399 | 51.447 |
| O | 53.995 | 33.181 | 40.854 |
| H | 53.831 | 32.242 | 40.763 |
| H | 54.657 | 33.374 | 40.19  |
| O | 59.267 | 48.769 | 38.198 |
| H | 59.426 | 48.676 | 37.259 |
| H | 58.337 | 48.569 | 38.305 |
| O | 51.269 | 31.183 | 37.546 |
| H | 51.387 | 31.565 | 36.676 |
| H | 52.055 | 30.655 | 37.684 |
| O | 56.589 | 34.674 | 43.661 |
| H | 56.064 | 35.22  | 44.247 |
| H | 56.096 | 33.856 | 43.592 |
| O | 56.963 | 41.45  | 44.978 |
| H | 56.88  | 40.604 | 45.417 |
| H | 57.852 | 41.74  | 45.183 |
| O | 47.173 | 38.569 | 41.361 |
| H | 47.647 | 39.143 | 40.759 |
| H | 46.846 | 39.155 | 42.043 |
| O | 51.774 | 48.664 | 31.423 |
| H | 50.972 | 48.479 | 30.935 |
| H | 52.371 | 47.956 | 31.18  |
| O | 49.653 | 47.731 | 30.267 |
| H | 48.871 | 48.078 | 30.697 |
| H | 49.906 | 46.979 | 30.802 |
| O | 55.315 | 50.4   | 49.377 |
| H | 55.407 | 49.448 | 49.338 |
| H | 55.913 | 50.67  | 50.075 |
| O | 57.482 | 38.369 | 32.784 |
| H | 57.027 | 38.137 | 31.975 |
| H | 57.979 | 37.583 | 33.013 |
| O | 58.413 | 46.363 | 21.256 |
| H | 57.74  | 46.017 | 21.842 |
| H | 59.067 | 46.745 | 21.841 |
| O | 41.422 | 31.328 | 44.444 |

|   |        |        |        |
|---|--------|--------|--------|
| H | 42.129 | 30.934 | 44.954 |
| H | 40.691 | 30.716 | 44.535 |
| O | 51.209 | 48.917 | 49.33  |
| H | 51.303 | 49.734 | 48.84  |
| H | 51.505 | 48.239 | 48.722 |
| O | 53.247 | 43.693 | 49.132 |
| H | 52.489 | 43.491 | 48.583 |
| H | 53.096 | 43.202 | 49.94  |
| O | 54.029 | 45.214 | 33.465 |
| H | 53.146 | 45.383 | 33.791 |
| H | 53.961 | 44.372 | 33.015 |
| O | 52.437 | 44.811 | 39.689 |
| H | 52.359 | 45.729 | 39.432 |
| H | 51.797 | 44.703 | 40.394 |
| O | 52.047 | 41.065 | 38.229 |
| H | 52.339 | 41.803 | 37.694 |
| H | 52.588 | 40.33  | 37.94  |
| O | 52.481 | 43.547 | 37.192 |
| H | 53.257 | 43.771 | 36.679 |
| H | 52.496 | 44.159 | 37.928 |
| O | 59.32  | 38.478 | 41.313 |
| H | 60.238 | 38.702 | 41.163 |
| H | 59.338 | 37.561 | 41.587 |
| O | 54.926 | 46.626 | 42.456 |
| H | 55.375 | 47.327 | 41.984 |
| H | 55.502 | 45.867 | 42.362 |
| O | 58.846 | 34.337 | 37.201 |
| H | 58.254 | 34.834 | 36.637 |
| H | 58.266 | 33.851 | 37.787 |
| O | 51.039 | 37.717 | 32.033 |
| H | 50.45  | 38.329 | 32.474 |
| H | 51.143 | 36.996 | 32.653 |
| O | 50.822 | 39.392 | 29.583 |
| H | 49.903 | 39.127 | 29.609 |
| H | 51.22  | 38.954 | 30.335 |
| O | 58.537 | 54.622 | 36.331 |
| H | 58.18  | 53.734 | 36.335 |
| H | 58.936 | 54.715 | 35.466 |
| O | 42.513 | 43.777 | 42.097 |
| H | 42.407 | 44.636 | 41.688 |
| H | 42.563 | 43.962 | 43.034 |
| O | 47.014 | 38.043 | 47.862 |
| H | 47.072 | 37.775 | 46.945 |
| H | 46.796 | 37.238 | 48.333 |
| O | 55.785 | 49.23  | 29.923 |
| H | 55.596 | 48.827 | 29.076 |
| H | 56.735 | 49.343 | 29.928 |

|   |        |        |        |
|---|--------|--------|--------|
| O | 50.044 | 39.992 | 42.262 |
| H | 50.85  | 40.282 | 41.835 |
| H | 49.723 | 39.279 | 41.71  |
| O | 53.186 | 42.275 | 23.525 |
| H | 52.712 | 41.448 | 23.443 |
| H | 53.201 | 42.631 | 22.636 |
| O | 52.991 | 38.349 | 53.463 |
| H | 52.395 | 38.29  | 52.716 |
| H | 53.276 | 37.448 | 53.614 |
| O | 54.605 | 38.651 | 34.633 |
| H | 54.93  | 38.214 | 33.846 |
| H | 55.393 | 38.977 | 35.068 |
| O | 51.455 | 34.868 | 45.687 |
| H | 50.513 | 34.819 | 45.525 |
| H | 51.718 | 35.708 | 45.311 |
| O | 59.014 | 36.273 | 33.396 |
| H | 58.691 | 35.474 | 33.814 |
| H | 59.882 | 36.037 | 33.069 |
| O | 48.722 | 34.9   | 44.618 |
| H | 48.676 | 35.013 | 43.669 |
| H | 48.356 | 35.71  | 44.974 |
| O | 60.347 | 45.453 | 32.382 |
| H | 60.761 | 44.971 | 31.667 |
| H | 61.066 | 45.666 | 32.977 |
| O | 54.009 | 33.798 | 45.713 |
| H | 53.098 | 33.941 | 45.97  |
| H | 54.034 | 34.032 | 44.785 |
| O | 43.736 | 30.745 | 45.828 |
| H | 44.301 | 30.353 | 45.163 |
| H | 44.105 | 31.617 | 45.971 |
| O | 52.438 | 37.391 | 44.582 |
| H | 52.508 | 37.454 | 43.63  |
| H | 52.809 | 38.212 | 44.905 |
| O | 57.44  | 32.662 | 51.394 |
| H | 56.93  | 33.344 | 50.956 |
| H | 56.783 | 32.06  | 51.745 |
| O | 47.799 | 36.226 | 34.226 |
| H | 47.256 | 37.001 | 34.365 |
| H | 47.393 | 35.779 | 33.483 |
| O | 51.796 | 44.876 | 44.067 |
| H | 52.029 | 45.776 | 44.293 |
| H | 52.435 | 44.338 | 44.534 |
| O | 58.115 | 31.168 | 48.923 |
| H | 57.981 | 31.583 | 48.07  |
| H | 58.77  | 31.717 | 49.354 |
| O | 51.274 | 32.521 | 30.685 |
| H | 51.443 | 32.592 | 29.745 |

|   |        |        |        |
|---|--------|--------|--------|
| H | 50.73  | 31.739 | 30.771 |
| O | 52.135 | 52.147 | 40.917 |
| H | 51.876 | 51.381 | 40.405 |
| H | 51.313 | 52.487 | 41.272 |
| O | 50.582 | 27.319 | 28.17  |
| H | 50.375 | 26.427 | 28.449 |
| H | 51.539 | 27.343 | 28.136 |
| O | 59.112 | 48.155 | 33.579 |
| H | 58.315 | 48.595 | 33.285 |
| H | 59.72  | 48.247 | 32.845 |
| O | 48.383 | 34.855 | 36.519 |
| H | 48.284 | 33.962 | 36.187 |
| H | 48.114 | 35.413 | 35.79  |
| O | 44.607 | 42.064 | 46.874 |
| H | 45.416 | 41.647 | 47.171 |
| H | 43.921 | 41.429 | 47.08  |
| O | 49.807 | 42.4   | 39.394 |
| H | 50.602 | 42.052 | 38.991 |
| H | 50.12  | 43.076 | 39.996 |
| O | 52.358 | 47.146 | 38.125 |
| H | 51.414 | 47.292 | 38.067 |
| H | 52.741 | 47.839 | 37.586 |
| O | 43.352 | 47.136 | 31.377 |
| H | 43.607 | 46.568 | 30.651 |
| H | 42.743 | 47.764 | 30.988 |
| O | 50.425 | 44.479 | 41.526 |
| H | 50.941 | 44.644 | 42.314 |
| H | 49.521 | 44.652 | 41.791 |
| O | 50.479 | 35.907 | 41.66  |
| H | 51.129 | 36.598 | 41.786 |
| H | 50.816 | 35.393 | 40.926 |
| O | 47.335 | 37.895 | 38.55  |
| H | 47.927 | 38.555 | 38.912 |
| H | 47.67  | 37.063 | 38.885 |
| O | 47.065 | 28.057 | 29.099 |
| H | 47.385 | 27.392 | 29.708 |
| H | 47.204 | 27.675 | 28.233 |
| O | 44.794 | 35.432 | 28.88  |
| H | 44.426 | 34.564 | 29.046 |
| H | 44.035 | 35.981 | 28.685 |
| O | 48.562 | 26.441 | 42.324 |
| H | 48.053 | 27.182 | 41.994 |
| H | 47.907 | 25.775 | 42.533 |
| O | 48.155 | 32.516 | 35.141 |
| H | 48.427 | 32.774 | 34.26  |
| H | 48.137 | 31.559 | 35.115 |
| O | 50.726 | 41.789 | 44.928 |



|   |        |        |        |
|---|--------|--------|--------|
| H | 50.523 | 41.172 | 44.225 |
| H | 50.212 | 42.568 | 44.719 |
| O | 54.658 | 41.979 | 43.431 |
| H | 55.556 | 42.118 | 43.733 |
| H | 54.748 | 41.767 | 42.502 |
| O | 53.075 | 30.753 | 44.05  |
| H | 53.164 | 29.993 | 43.476 |
| H | 52.394 | 31.285 | 43.64  |
| O | 54.15  | 22.449 | 49.271 |
| H | 53.294 | 22.631 | 48.883 |
| H | 54.741 | 22.369 | 48.523 |
| O | 46.346 | 44.433 | 49.152 |
| H | 47.021 | 44.453 | 48.474 |
| H | 46.531 | 43.637 | 49.651 |
| O | 44.427 | 49.418 | 43.858 |
| H | 44.649 | 49.291 | 44.78  |
| H | 43.658 | 49.987 | 43.873 |
| O | 58.903 | 45.713 | 35.436 |
| H | 58.526 | 44.883 | 35.142 |
| H | 59.131 | 46.172 | 34.628 |
| O | 49.147 | 39.724 | 39.359 |
| H | 49.545 | 40.558 | 39.608 |
| H | 49.531 | 39.52  | 38.507 |
| O | 53.562 | 27.201 | 40.905 |
| H | 53.763 | 26.926 | 41.799 |
| H | 52.607 | 27.267 | 40.883 |
| O | 54.116 | 48.05  | 34.681 |
| H | 54.566 | 47.82  | 35.494 |
| H | 54.23  | 47.284 | 34.119 |
| O | 55.475 | 36.61  | 37.237 |
| H | 55.864 | 36.411 | 36.386 |
| H | 56.224 | 36.718 | 37.823 |
| O | 49.821 | 40.627 | 47.84  |
| H | 50.604 | 41.162 | 47.705 |
| H | 50.039 | 39.781 | 47.449 |
| O | 54.644 | 52.836 | 32.632 |
| H | 54.001 | 53.474 | 32.942 |
| H | 54.314 | 51.993 | 32.942 |
| O | 48.261 | 30.407 | 30.525 |
| H | 48.733 | 30.711 | 29.749 |
| H | 47.704 | 29.698 | 30.204 |
| O | 53.051 | 34.292 | 43.192 |
| H | 52.118 | 34.253 | 42.982 |
| H | 53.491 | 34.078 | 42.37  |
| O | 64.276 | 42.706 | 43.979 |
| H | 63.86  | 42.366 | 44.771 |
| H | 63.796 | 42.294 | 43.261 |

|   |        |        |        |
|---|--------|--------|--------|
| O | 52.063 | 33.187 | 52.195 |
| H | 51.15  | 33.091 | 52.466 |
| H | 52.501 | 32.413 | 52.55  |
| O | 63.985 | 43.451 | 38.892 |
| H | 64.206 | 44.004 | 38.142 |
| H | 63.398 | 43.991 | 39.422 |
| O | 54.398 | 42.863 | 31.793 |
| H | 54.46  | 41.911 | 31.711 |
| H | 53.931 | 43.141 | 31.005 |
| O | 56.998 | 42.932 | 20.923 |
| H | 56.19  | 42.445 | 21.084 |
| H | 57.67  | 42.448 | 21.404 |
| O | 48.808 | 34.875 | 20.265 |
| H | 49.12  | 35.774 | 20.163 |
| H | 49.537 | 34.414 | 20.68  |
| O | 54.705 | 40.972 | 21.155 |
| H | 54.988 | 40.095 | 21.416 |
| H | 54.34  | 40.855 | 20.278 |
| O | 47.08  | 40.78  | 15.42  |
| H | 46.243 | 40.536 | 15.026 |
| H | 46.942 | 40.672 | 16.361 |
| O | 46.646 | 30.826 | 17.855 |
| H | 46.318 | 31.697 | 17.632 |
| H | 46.577 | 30.781 | 18.809 |
| O | 56.078 | 41.98  | 28.68  |
| H | 56.485 | 41.415 | 28.023 |
| H | 55.507 | 42.56  | 28.176 |
| O | 51.732 | 39.775 | 21.285 |
| H | 51.644 | 40.169 | 22.153 |
| H | 51.255 | 40.367 | 20.704 |
| O | 45.13  | 33.843 | 22.711 |
| H | 44.673 | 34.604 | 22.353 |
| H | 44.521 | 33.478 | 23.352 |
| O | 63.718 | 37.571 | 24.886 |
| H | 63.167 | 37.053 | 25.473 |
| H | 64.502 | 37.764 | 25.401 |
| O | 56.847 | 35.858 | 10.842 |
| H | 57.144 | 36.122 | 11.713 |
| H | 55.951 | 36.189 | 10.784 |
| O | 55.036 | 38.902 | 23.386 |
| H | 54.438 | 38.843 | 24.131 |
| H | 55.867 | 39.187 | 23.767 |
| O | 50.419 | 33.389 | 21.971 |
| H | 49.556 | 33.208 | 22.345 |
| H | 51.037 | 33.051 | 22.619 |
| O | 53.108 | 34.081 | 22.663 |
| H | 53.647 | 34.822 | 22.386 |

|   |        |        |        |
|---|--------|--------|--------|
| H | 53.676 | 33.318 | 22.555 |
| O | 57.263 | 37.107 | 23.798 |
| H | 56.66  | 37.39  | 24.486 |
| H | 57.041 | 36.188 | 23.649 |
| O | 46     | 37.457 | 23.495 |
| H | 45.291 | 37.879 | 23.978 |
| H | 46.172 | 36.649 | 23.979 |
| O | 49.617 | 29.157 | 19.548 |
| H | 50.508 | 29.47  | 19.393 |
| H | 49.339 | 28.798 | 18.704 |
| O | 58.459 | 46.262 | 26.191 |
| H | 58.945 | 46.966 | 25.762 |
| H | 58.73  | 45.468 | 25.731 |
| O | 44.797 | 41.493 | 17.229 |
| H | 45.601 | 41.199 | 17.657 |
| H | 44.454 | 42.176 | 17.805 |
| O | 59.326 | 25.132 | 21.233 |
| H | 58.856 | 24.34  | 21.493 |
| H | 60.246 | 24.869 | 21.209 |
| O | 58.906 | 33.139 | 13.117 |
| H | 58.83  | 32.221 | 13.377 |
| H | 59.841 | 33.265 | 12.954 |
| O | 57.5   | 38.795 | 14.387 |
| H | 57.841 | 39.685 | 14.468 |
| H | 58.12  | 38.352 | 13.808 |
| O | 47.88  | 37.646 | 14.876 |
| H | 47.785 | 37.637 | 15.829 |
| H | 48.824 | 37.578 | 14.729 |
| O | 54.145 | 44.833 | 19.086 |
| H | 53.872 | 45.097 | 18.207 |
| H | 55.037 | 45.169 | 19.17  |
| O | 58.625 | 38.389 | 21.455 |
| H | 58.306 | 38.031 | 22.283 |
| H | 58.889 | 37.621 | 20.948 |
| O | 60.3   | 50.331 | 34.84  |
| H | 59.814 | 51.002 | 34.362 |
| H | 59.954 | 49.502 | 34.509 |
| O | 55.581 | 43.402 | 24.078 |
| H | 56.27  | 42.76  | 23.905 |
| H | 54.765 | 42.924 | 23.931 |
| O | 60.125 | 37.584 | 24.17  |
| H | 60.452 | 37.149 | 24.957 |
| H | 59.275 | 37.176 | 24.005 |
| O | 53.08  | 38.162 | 24.921 |
| H | 52.693 | 37.46  | 24.397 |
| H | 52.416 | 38.361 | 25.581 |
| O | 52.408 | 36.552 | 17.231 |

|   |        |        |        |
|---|--------|--------|--------|
| H | 52.455 | 37.412 | 16.814 |
| H | 52.488 | 36.735 | 18.168 |
| O | 42.97  | 42.32  | 21.509 |
| H | 43.502 | 42.336 | 22.305 |
| H | 42.16  | 42.768 | 21.752 |
| O | 53.534 | 34.029 | 17.574 |
| H | 53.151 | 34.853 | 17.274 |
| H | 52.964 | 33.747 | 18.289 |
| O | 58.406 | 41.341 | 14.829 |
| H | 58.341 | 42.27  | 14.608 |
| H | 59.335 | 41.134 | 14.727 |
| O | 50.573 | 41.053 | 23.692 |
| H | 50.112 | 40.215 | 23.675 |
| H | 50.359 | 41.427 | 24.546 |
| O | 44.687 | 32.665 | 29.278 |
| H | 45.634 | 32.799 | 29.257 |
| H | 44.5   | 32.411 | 30.182 |
| O | 54.631 | 31.884 | 21.36  |
| H | 54.845 | 31.037 | 21.75  |
| H | 55.383 | 32.089 | 20.804 |
| O | 61.111 | 28.571 | 15.981 |
| H | 60.185 | 28.365 | 16.108 |
| H | 61.155 | 29.525 | 16.041 |
| O | 61.926 | 35.98  | 26.105 |
| H | 61.003 | 35.737 | 26.18  |
| H | 62.225 | 36.069 | 27.01  |
| O | 54.393 | 39.637 | 18.537 |
| H | 54.888 | 39.272 | 17.804 |
| H | 54.431 | 40.584 | 18.405 |
| O | 56.904 | 34.527 | 28.459 |
| H | 56.764 | 34.516 | 27.512 |
| H | 56.024 | 34.48  | 28.832 |
| O | 61.772 | 32.946 | 12.183 |
| H | 62.287 | 32.232 | 12.561 |
| H | 62.379 | 33.391 | 11.592 |
| O | 46.909 | 35.285 | 26.881 |
| H | 46.655 | 34.99  | 27.756 |
| H | 47.56  | 34.645 | 26.593 |
| O | 56.951 | 28.92  | 31.608 |
| H | 57.416 | 29.526 | 32.186 |
| H | 56.163 | 28.682 | 32.095 |
| O | 47.566 | 28.278 | 17.561 |
| H | 46.844 | 27.701 | 17.313 |
| H | 47.171 | 29.149 | 17.607 |
| O | 50.088 | 34.746 | 16.956 |
| H | 50.741 | 35.165 | 17.516 |
| H | 50.097 | 35.263 | 16.15  |

|   |        |        |        |
|---|--------|--------|--------|
| O | 55.351 | 44.201 | 26.812 |
| H | 56.074 | 44.557 | 27.328 |
| H | 55.73  | 44.04  | 25.948 |
| O | 51.105 | 31.442 | 23.731 |
| H | 51.318 | 30.691 | 24.284 |
| H | 50.463 | 31.105 | 23.106 |
| O | 52.742 | 34.187 | 13.839 |
| H | 53.555 | 33.77  | 13.552 |
| H | 52.284 | 33.505 | 14.331 |
| O | 54.111 | 35.288 | 10.019 |
| H | 53.462 | 35.977 | 9.878  |
| H | 53.593 | 34.511 | 10.231 |
| O | 54.489 | 38.338 | 11.438 |
| H | 54.729 | 37.692 | 12.103 |
| H | 54.41  | 39.161 | 11.922 |
| O | 40.868 | 41.345 | 18.906 |
| H | 41.514 | 40.869 | 18.384 |
| H | 40.774 | 40.824 | 19.704 |
| O | 54.132 | 34.418 | 29.316 |
| H | 53.846 | 35.296 | 29.568 |
| H | 53.483 | 34.129 | 28.675 |
| O | 47.567 | 28.509 | 23.566 |
| H | 46.783 | 28.09  | 23.211 |
| H | 47.821 | 27.955 | 24.304 |
| O | 48.259 | 37.696 | 26.648 |
| H | 47.77  | 38.363 | 27.131 |
| H | 47.738 | 36.899 | 26.746 |
| O | 46.312 | 44.208 | 19.374 |
| H | 45.573 | 43.701 | 19.036 |
| H | 46.606 | 44.729 | 18.627 |
| O | 55.481 | 25.801 | 19.054 |
| H | 55.079 | 24.936 | 18.975 |
| H | 56.406 | 25.655 | 18.856 |
| O | 58.531 | 37.896 | 28.829 |
| H | 58.885 | 38.552 | 29.429 |
| H | 57.692 | 37.646 | 29.215 |
| O | 59.18  | 36.194 | 15.691 |
| H | 59.613 | 36.514 | 14.9   |
| H | 59.019 | 36.981 | 16.211 |
| O | 61.053 | 37.38  | 8.02   |
| H | 61.561 | 38.115 | 8.365  |
| H | 60.73  | 37.688 | 7.174  |
| O | 51.026 | 42.143 | 19.551 |
| H | 50.117 | 42.436 | 19.616 |
| H | 51.544 | 42.91  | 19.795 |
| O | 50.443 | 30.602 | 28.548 |
| H | 51.242 | 30.079 | 28.615 |

|   |        |        |        |
|---|--------|--------|--------|
| H | 50.069 | 30.361 | 27.701 |
| O | 63.759 | 43.97  | 27.011 |
| H | 64.635 | 43.69  | 27.275 |
| H | 63.743 | 43.845 | 26.062 |
| O | 58.287 | 41.801 | 17.484 |
| H | 57.955 | 41.046 | 17.97  |
| H | 58.378 | 41.486 | 16.585 |
| O | 46.5   | 36.819 | 17.8   |
| H | 46.645 | 37.558 | 18.391 |
| H | 46.626 | 36.045 | 18.349 |
| O | 58.035 | 40.592 | 11.995 |
| H | 57.713 | 39.785 | 11.593 |
| H | 57.245 | 41.046 | 12.288 |
| O | 54.824 | 42.458 | 34.587 |
| H | 55.435 | 41.765 | 34.338 |
| H | 54.718 | 42.981 | 33.792 |
| O | 45.086 | 28.124 | 10.523 |
| H | 45.7   | 27.729 | 9.905  |
| H | 44.395 | 28.492 | 9.972  |
| O | 53.618 | 44.994 | 16.252 |
| H | 52.774 | 44.545 | 16.199 |
| H | 53.578 | 45.66  | 15.565 |
| O | 48.93  | 30.386 | 21.926 |
| H | 49.285 | 30.008 | 21.122 |
| H | 48.723 | 29.63  | 22.476 |
| O | 49.017 | 42.495 | 28.881 |
| H | 49.524 | 42.708 | 29.665 |
| H | 49.674 | 42.374 | 28.196 |
| O | 55.84  | 46.348 | 36.267 |
| H | 55.58  | 45.43  | 36.348 |
| H | 56.585 | 46.333 | 35.667 |
| O | 62.134 | 46.981 | 17.98  |
| H | 62.343 | 46.335 | 17.305 |
| H | 61.388 | 46.605 | 18.449 |
| O | 48.241 | 43.24  | 20.848 |
| H | 48.033 | 42.332 | 20.628 |
| H | 47.603 | 43.758 | 20.357 |
| O | 57.193 | 44.142 | 18.262 |
| H | 57.36  | 43.233 | 18.012 |
| H | 56.931 | 44.093 | 19.182 |
| O | 55.661 | 29.488 | 16.485 |
| H | 55.197 | 29.995 | 17.152 |
| H | 55.27  | 29.768 | 15.657 |
| O | 56.704 | 34.496 | 22.712 |
| H | 56.86  | 33.832 | 22.04  |
| H | 56.065 | 35.089 | 22.318 |
| O | 58.223 | 50.049 | 16.935 |

|   |        |        |        |
|---|--------|--------|--------|
| H | 58.325 | 49.885 | 17.872 |
| H | 57.338 | 50.404 | 16.849 |
| O | 54.337 | 30.424 | 14.151 |
| H | 54.531 | 31.206 | 13.634 |
| H | 53.416 | 30.237 | 13.965 |
| O | 60.496 | 37.876 | 17.863 |
| H | 59.76  | 38.444 | 18.091 |
| H | 61.125 | 38.002 | 18.574 |
| O | 60.436 | 34.628 | 7.859  |
| H | 60.133 | 34.436 | 8.746  |
| H | 60.694 | 35.55  | 7.888  |
| O | 48.717 | 49.996 | 21.234 |
| H | 49.665 | 50.079 | 21.341 |
| H | 48.559 | 49.052 | 21.233 |
| O | 51.87  | 38.907 | 15.947 |
| H | 51.738 | 38.146 | 15.382 |
| H | 52.644 | 39.34  | 15.588 |
| O | 53.359 | 39.486 | 28.253 |
| H | 53.76  | 39.985 | 27.542 |
| H | 52.418 | 39.546 | 28.089 |
| O | 55.469 | 38.07  | 15.895 |
| H | 55.474 | 37.122 | 16.027 |
| H | 56.288 | 38.252 | 15.435 |
| O | 45.969 | 35.193 | 20.095 |
| H | 46.768 | 35.083 | 20.611 |
| H | 45.701 | 34.3   | 19.876 |
| O | 57.876 | 39.402 | 18.899 |
| H | 57.113 | 38.826 | 18.942 |
| H | 58.26  | 39.358 | 19.774 |
| O | 55.023 | 31.547 | 28.96  |
| H | 55.918 | 31.748 | 28.689 |
| H | 54.673 | 32.381 | 29.271 |
| O | 62.14  | 43.866 | 9.902  |
| H | 61.698 | 43.068 | 10.191 |
| H | 61.793 | 44.552 | 10.472 |
| O | 46.705 | 41.561 | 30.813 |
| H | 46.971 | 40.642 | 30.823 |
| H | 47.356 | 41.993 | 30.259 |
| O | 55.739 | 37.145 | 18.988 |
| H | 55.134 | 37.852 | 18.767 |
| H | 55.896 | 36.694 | 18.159 |
| O | 48.822 | 33.438 | 25.716 |
| H | 49.697 | 33.145 | 25.459 |
| H | 48.234 | 33.007 | 25.096 |
| O | 50.755 | 36.109 | 14.587 |
| H | 50.778 | 36.509 | 13.718 |
| H | 51.426 | 35.427 | 14.555 |

|   |        |        |        |
|---|--------|--------|--------|
| O | 53.381 | 32.491 | 25.067 |
| H | 52.972 | 32.478 | 24.201 |
| H | 53.408 | 31.572 | 25.333 |
| O | 57.738 | 32.785 | 20.679 |
| H | 58.437 | 32.142 | 20.798 |
| H | 58.11  | 33.434 | 20.082 |
| O | 52.914 | 44.045 | 29.626 |
| H | 52.952 | 44.936 | 29.973 |
| H | 52.473 | 43.541 | 30.31  |
| O | 61.534 | 39.204 | 29.332 |
| H | 60.752 | 39.632 | 29.681 |
| H | 61.336 | 38.268 | 29.379 |
| O | 52.128 | 27.873 | 10.024 |
| H | 52.752 | 28.046 | 10.73  |
| H | 52.53  | 27.167 | 9.517  |
| O | 54.397 | 52.815 | 24.211 |
| H | 53.959 | 52.112 | 23.731 |
| H | 55.064 | 53.139 | 23.606 |
| O | 59.036 | 35.46  | 25.856 |
| H | 58.263 | 34.944 | 25.625 |
| H | 58.783 | 35.929 | 26.651 |
| O | 58.564 | 30.447 | 6.969  |
| H | 57.94  | 30.966 | 6.461  |
| H | 59.302 | 31.038 | 7.118  |
| O | 57.457 | 41.493 | 24.378 |
| H | 58.251 | 41.151 | 23.967 |
| H | 57.582 | 41.331 | 25.313 |
| O | 56.82  | 33.249 | 10.864 |
| H | 56.922 | 34.201 | 10.86  |
| H | 57.544 | 32.933 | 11.404 |
| O | 62.836 | 45.082 | 13.023 |
| H | 62.008 | 45.341 | 13.427 |
| H | 63.078 | 45.828 | 12.474 |
| O | 46.98  | 45.188 | 16.72  |
| H | 47.476 | 45.954 | 16.428 |
| H | 46.181 | 45.206 | 16.193 |
| O | 45.861 | 48.491 | 20.721 |
| H | 45.86  | 49.169 | 21.397 |
| H | 46.718 | 48.569 | 20.304 |
| O | 60.287 | 45.526 | 19.319 |
| H | 60.197 | 44.575 | 19.259 |
| H | 59.451 | 45.823 | 19.68  |
| O | 50.263 | 45.283 | 18.754 |
| H | 50.924 | 44.739 | 18.325 |
| H | 50.014 | 45.925 | 18.09  |
| O | 38.859 | 42.227 | 17.185 |
| H | 39.671 | 42.08  | 17.671 |



|   |        |        |        |
|---|--------|--------|--------|
| H | 39.082 | 42.017 | 16.278 |
| O | 46.541 | 30.455 | 20.49  |
| H | 47.454 | 30.545 | 20.763 |
| H | 46.097 | 30.088 | 21.254 |
| O | 46.59  | 39.88  | 27.556 |
| H | 45.773 | 39.801 | 28.049 |
| H | 46.316 | 40.156 | 26.681 |
| O | 54.847 | 36.15  | 21.552 |
| H | 54.908 | 36.982 | 22.022 |
| H | 54.995 | 36.382 | 20.635 |
| O | 59.223 | 34.44  | 18.334 |
| H | 59.454 | 33.674 | 17.81  |
| H | 58.852 | 35.059 | 17.705 |
| O | 54.66  | 36.374 | 13.42  |
| H | 54.029 | 35.66  | 13.515 |
| H | 55.515 | 35.946 | 13.474 |
| O | 47.724 | 30.847 | 25.206 |
| H | 47.455 | 30.29  | 24.474 |
| H | 48.412 | 30.348 | 25.646 |
| O | 54.105 | 27.162 | 24.527 |
| H | 54.957 | 27.137 | 24.962 |
| H | 54.314 | 27.199 | 23.594 |
| O | 54.851 | 40.263 | 30.913 |
| H | 55.51  | 40.683 | 30.36  |
| H | 54.051 | 40.283 | 30.388 |
| O | 54.454 | 42.229 | 17.497 |
| H | 54.828 | 42.917 | 16.947 |
| H | 53.534 | 42.189 | 17.237 |
| O | 50.053 | 29.473 | 26.085 |
| H | 50.586 | 29.182 | 25.345 |
| H | 49.917 | 28.682 | 26.607 |
| O | 46.245 | 25.868 | 33.491 |
| H | 45.375 | 26.264 | 33.445 |
| H | 46.846 | 26.585 | 33.288 |
| O | 46.046 | 53.171 | 24.652 |
| H | 46.711 | 53.857 | 24.599 |
| H | 46.448 | 52.489 | 25.191 |
| O | 50.899 | 39.342 | 26.41  |
| H | 50.274 | 39.19  | 25.702 |
| H | 50.454 | 39.022 | 27.195 |
| O | 56.332 | 45.618 | 22.928 |
| H | 55.528 | 45.732 | 22.421 |
| H | 56.199 | 44.8   | 23.406 |
| O | 56.972 | 46.533 | 16.99  |
| H | 57.074 | 45.637 | 17.312 |
| H | 56.329 | 46.928 | 17.579 |
| O | 61.622 | 36.034 | 32.651 |

|   |        |        |        |
|---|--------|--------|--------|
| H | 61.855 | 35.258 | 33.161 |
| H | 62.238 | 36.032 | 31.918 |
| O | 48.79  | 44.257 | 23.301 |
| H | 48.625 | 43.6   | 23.977 |
| H | 48.575 | 43.815 | 22.479 |
| O | 52.358 | 33.141 | 20.011 |
| H | 53.139 | 32.727 | 20.379 |
| H | 51.824 | 33.364 | 20.774 |
| O | 58.68  | 30.398 | 14.255 |
| H | 58.201 | 29.607 | 14.007 |
| H | 59.585 | 30.22  | 13.999 |
| O | 53.039 | 52.729 | 7.569  |
| H | 53.549 | 53.527 | 7.429  |
| H | 53.3   | 52.427 | 8.439  |
| O | 58.952 | 31.956 | 16.507 |
| H | 59.876 | 32.194 | 16.43  |
| H | 58.813 | 31.31  | 15.815 |
| O | 58.26  | 27.489 | 13.8   |
| H | 58.234 | 27.157 | 14.698 |
| H | 59.182 | 27.429 | 13.55  |
| O | 62.205 | 44.385 | 30.746 |
| H | 61.799 | 44.313 | 29.882 |
| H | 63.042 | 44.82  | 30.582 |
| O | 53.612 | 33.862 | 34.803 |
| H | 53.664 | 34.335 | 33.972 |
| H | 53.95  | 32.989 | 34.604 |
| O | 52.458 | 48.295 | 12.265 |
| H | 51.734 | 48.864 | 12.528 |
| H | 53.136 | 48.898 | 11.958 |
| O | 52.474 | 44.389 | 13.009 |
| H | 52.7   | 45.036 | 13.677 |
| H | 52.285 | 43.591 | 13.503 |
| O | 65.058 | 40.253 | 10.357 |
| H | 65.166 | 41.196 | 10.238 |
| H | 65.598 | 39.861 | 9.67   |
| O | 54.509 | 41.165 | -1.155 |
| H | 55.318 | 40.736 | -0.875 |
| H | 54.162 | 40.595 | -1.841 |
| O | 57.713 | 51.71  | -4.126 |
| H | 56.982 | 51.093 | -4.149 |
| H | 57.459 | 52.405 | -4.733 |
| O | 45.118 | 32.184 | 4.739  |
| H | 44.399 | 31.556 | 4.812  |
| H | 45.016 | 32.755 | 5.501  |
| O | 59.48  | 42.719 | 0.75   |
| H | 59.548 | 43.409 | 0.09   |
| H | 59.207 | 43.175 | 1.546  |

|   |        |        |        |
|---|--------|--------|--------|
| O | 54.535 | 36.812 | -8.078 |
| H | 54.708 | 36.521 | -7.183 |
| H | 53.606 | 37.042 | -8.081 |
| O | 49.7   | 33.761 | 0.582  |
| H | 50.524 | 33.383 | 0.886  |
| H | 49.883 | 34.047 | -0.313 |
| O | 62.826 | 33.06  | 2.015  |
| H | 63.664 | 32.663 | 1.777  |
| H | 62.609 | 33.625 | 1.274  |
| O | 55.803 | 31.321 | 0.516  |
| H | 54.893 | 31.04  | 0.609  |
| H | 55.873 | 32.095 | 1.075  |
| O | 53.202 | 35.421 | -5.179 |
| H | 53.798 | 34.68  | -5.288 |
| H | 52.336 | 35.063 | -5.375 |
| O | 51.269 | 25.524 | 3.496  |
| H | 50.837 | 24.7   | 3.721  |
| H | 50.668 | 25.949 | 2.883  |
| O | 53.685 | 41.822 | 1.458  |
| H | 54.148 | 42.606 | 1.751  |
| H | 54.07  | 41.621 | 0.605  |
| O | 45.545 | 31.519 | 8.24   |
| H | 46.328 | 31.516 | 7.689  |
| H | 45.808 | 31.047 | 9.03   |
| O | 49.308 | 44.829 | 11.153 |
| H | 50.235 | 45.063 | 11.122 |
| H | 49.155 | 44.349 | 10.338 |
| O | 58.713 | 35.02  | -0.615 |
| H | 58.637 | 35.974 | -0.609 |
| H | 58.614 | 34.767 | 0.303  |
| O | 55.48  | 41.778 | 4.226  |
| H | 55.428 | 42.716 | 4.047  |
| H | 54.589 | 41.531 | 4.474  |
| O | 52.458 | 48.13  | 7.946  |
| H | 52.151 | 48.792 | 7.327  |
| H | 52.008 | 48.341 | 8.764  |
| O | 52.643 | 36.673 | -2.612 |
| H | 52.708 | 37.552 | -2.985 |
| H | 52.798 | 36.086 | -3.353 |
| O | 58.66  | 43.225 | 10.063 |
| H | 59.2   | 42.447 | 10.199 |
| H | 59.201 | 43.951 | 10.373 |
| O | 60.831 | 38.292 | 5.27   |
| H | 60.311 | 39.089 | 5.17   |
| H | 60.702 | 37.817 | 4.448  |
| O | 55.554 | 43.226 | 14.761 |
| H | 55.11  | 43.846 | 15.34  |

|   |        |        |        |
|---|--------|--------|--------|
| H | 56.156 | 43.765 | 14.249 |
| O | 41.924 | 42.159 | 13.355 |
| H | 42.506 | 42.555 | 14.004 |
| H | 42.424 | 42.183 | 12.539 |
| O | 46.564 | 44.958 | 8.4    |
| H | 46.386 | 44.898 | 7.462  |
| H | 47.354 | 44.433 | 8.528  |
| O | 53.071 | 27.782 | 3.045  |
| H | 52.542 | 26.987 | 2.984  |
| H | 52.438 | 28.497 | 2.969  |
| O | 52.366 | 33.006 | 10.942 |
| H | 52.629 | 32.95  | 11.861 |
| H | 51.752 | 33.739 | 10.912 |
| O | 62.285 | 30.285 | -1.097 |
| H | 62.141 | 29.74  | -0.324 |
| H | 61.669 | 31.011 | -0.997 |
| O | 64.055 | 47.061 | 5.457  |
| H | 63.479 | 46.671 | 6.115  |
| H | 63.98  | 46.481 | 4.699  |
| O | 45.42  | 41.368 | 11.622 |
| H | 44.503 | 41.37  | 11.346 |
| H | 45.65  | 42.294 | 11.694 |
| O | 54.036 | 32.827 | 6.972  |
| H | 54.736 | 32.512 | 6.401  |
| H | 54.338 | 32.622 | 7.857  |
| O | 50.917 | 29.518 | 2.765  |
| H | 50.613 | 30.425 | 2.749  |
| H | 50.798 | 29.209 | 1.867  |
| O | 55.12  | 37.417 | 4.641  |
| H | 54.493 | 37.978 | 4.184  |
| H | 54.907 | 36.531 | 4.349  |
| O | 57.76  | 37.748 | -1.92  |
| H | 57.161 | 37.247 | -2.473 |
| H | 58.437 | 38.059 | -2.521 |
| O | 52.033 | 32.713 | 1.319  |
| H | 52.24  | 31.877 | 0.901  |
| H | 52.319 | 32.604 | 2.226  |
| O | 48.475 | 45.595 | 4.161  |
| H | 48.792 | 45.08  | 3.419  |
| H | 49.24  | 46.093 | 4.45   |
| O | 49.863 | 39.278 | 0.071  |
| H | 49.564 | 40.135 | -0.232 |
| H | 49.931 | 39.371 | 1.021  |
| O | 51.48  | 35.598 | 4.756  |
| H | 52.299 | 35.595 | 5.252  |
| H | 51.729 | 35.292 | 3.883  |
| O | 60.081 | 41.184 | 5.548  |

|   |        |        |        |
|---|--------|--------|--------|
| H | 59.15  | 40.964 | 5.58   |
| H | 60.125 | 41.956 | 4.984  |
| O | 52.856 | 40.224 | -3.681 |
| H | 52.835 | 39.602 | -4.409 |
| H | 51.968 | 40.579 | -3.645 |
| O | 50.919 | 40.432 | 10.313 |
| H | 50.453 | 39.619 | 10.116 |
| H | 50.232 | 41.096 | 10.36  |
| O | 51.575 | 36.426 | 8.277  |
| H | 51.942 | 35.63  | 7.892  |
| H | 51.951 | 37.138 | 7.758  |
| O | 58.473 | 46.928 | 12.808 |
| H | 58.593 | 47.802 | 12.438 |
| H | 57.837 | 47.051 | 13.512 |
| O | 56.711 | 42.885 | 8.23   |
| H | 57.104 | 43.051 | 9.087  |
| H | 57.176 | 42.117 | 7.898  |
| O | 45.539 | 23.4   | 7.862  |
| H | 46.46  | 23.536 | 8.085  |
| H | 45.123 | 24.244 | 8.037  |
| O | 57.445 | 40.361 | 7.605  |
| H | 57.37  | 40.112 | 6.684  |
| H | 56.915 | 39.714 | 8.072  |
| O | 56.016 | 47.425 | 14.443 |
| H | 55.895 | 48.371 | 14.359 |
| H | 56.27  | 47.296 | 15.357 |
| O | 53.44  | 35.384 | 6.541  |
| H | 53.727 | 34.473 | 6.598  |
| H | 54.166 | 35.888 | 6.909  |
| O | 51.714 | 51.217 | 1.306  |
| H | 51.07  | 51.431 | 0.631  |
| H | 52.361 | 50.672 | 0.857  |
| O | 54.272 | 50.324 | 11.706 |
| H | 54.429 | 50.714 | 10.846 |
| H | 54.187 | 51.072 | 12.296 |
| O | 49.372 | 33.486 | 5.744  |
| H | 50.059 | 34.065 | 5.415  |
| H | 49.441 | 33.55  | 6.697  |
| O | 54.184 | 40.401 | 15.222 |
| H | 54.561 | 39.523 | 15.279 |
| H | 54.917 | 40.989 | 15.404 |
| O | 55.822 | 30.021 | 8.704  |
| H | 55.4   | 30.761 | 9.141  |
| H | 56.281 | 29.559 | 9.406  |
| O | 56.002 | 36.246 | 7.815  |
| H | 55.522 | 35.836 | 8.534  |
| H | 56.047 | 37.172 | 8.054  |

|   |        |        |        |
|---|--------|--------|--------|
| O | 51.774 | 30.09  | 13.375 |
| H | 51.599 | 30.189 | 12.439 |
| H | 50.928 | 29.847 | 13.752 |
| O | 56.368 | 32.053 | 5.367  |
| H | 56.896 | 31.838 | 4.598  |
| H | 56.542 | 32.98  | 5.526  |
| O | 55.018 | 34.759 | 3.529  |
| H | 55.505 | 34.532 | 2.737  |
| H | 55.606 | 34.525 | 4.247  |
| O | 59.803 | 32.841 | 10.268 |
| H | 60.127 | 32.653 | 11.148 |
| H | 59.458 | 32.005 | 9.956  |
| O | 50.043 | 40.492 | 13.546 |
| H | 49.682 | 41.024 | 12.837 |
| H | 49.372 | 40.513 | 14.228 |
| O | 51.416 | 31.451 | 7.82   |
| H | 51.915 | 31.881 | 7.125  |
| H | 50.692 | 32.05  | 8.001  |
| O | 56.301 | 45.055 | 6.779  |
| H | 56.241 | 45.722 | 7.462  |
| H | 56.393 | 44.23  | 7.256  |
| O | 46.836 | 40.362 | 4.172  |
| H | 46.64  | 39.585 | 4.696  |
| H | 47.765 | 40.277 | 3.957  |
| O | 51.337 | 40.748 | 7.766  |
| H | 51.465 | 40.471 | 8.673  |
| H | 51.775 | 41.598 | 7.712  |
| O | 52.758 | 35.478 | 2.167  |
| H | 52.82  | 35.043 | 1.316  |
| H | 53.602 | 35.305 | 2.585  |
| O | 56.98  | 38.169 | 2.911  |
| H | 56.325 | 37.954 | 2.247  |
| H | 56.517 | 38.07  | 3.744  |
| O | 51.713 | 38.04  | 2.675  |
| H | 50.85  | 37.679 | 2.876  |
| H | 52.216 | 37.294 | 2.35   |
| O | 45.876 | 21.332 | 3.712  |
| H | 46.421 | 21.056 | 4.449  |
| H | 45.093 | 21.703 | 4.118  |
| O | 40.202 | 34.97  | 5.788  |
| H | 40.012 | 35.13  | 6.713  |
| H | 40.763 | 34.194 | 5.79   |
| O | 51.15  | 44.554 | 8.469  |
| H | 51.641 | 44.556 | 7.648  |
| H | 51.743 | 44.954 | 9.105  |
| O | 51.242 | 48.081 | 2.758  |
| H | 50.867 | 48.488 | 1.977  |

|   |        |        |        |
|---|--------|--------|--------|
| H | 50.546 | 48.131 | 3.413  |
| O | 56.409 | 23.298 | 13.502 |
| H | 56.136 | 22.928 | 14.342 |
| H | 55.65  | 23.178 | 12.931 |
| O | 59.637 | 34.706 | 5.224  |
| H | 60.112 | 33.963 | 4.852  |
| H | 59.983 | 34.792 | 6.112  |
| O | 51.405 | 49.817 | 6.013  |
| H | 52.163 | 50.135 | 5.523  |
| H | 51.082 | 50.587 | 6.481  |
| O | 45.773 | 46.153 | 2.732  |
| H | 46.404 | 46.533 | 3.344  |
| H | 46.069 | 46.446 | 1.87   |
| O | 60.37  | 47.684 | 0.026  |
| H | 60.85  | 47.18  | 0.684  |
| H | 60.658 | 48.587 | 0.159  |
| O | 51.547 | 56.464 | 10.769 |
| H | 51.2   | 57.355 | 10.818 |
| H | 52.087 | 56.46  | 9.979  |
| O | 60.84  | 28.652 | 5.824  |
| H | 60.363 | 29.381 | 6.22   |
| H | 61.2   | 28.169 | 6.567  |
| O | 58.829 | 56.155 | 14.976 |
| H | 58.275 | 56.565 | 15.64  |
| H | 58.356 | 56.287 | 14.155 |
| O | 52.563 | 38.596 | 6.56   |
| H | 52.125 | 39.314 | 7.017  |
| H | 53.294 | 39.013 | 6.104  |
| O | 57.703 | 28.169 | 52.347 |
| H | 57.837 | 28.359 | 51.419 |
| H | 56.908 | 27.636 | 52.369 |
| O | 54.519 | 20.694 | 53.828 |
| H | 55.306 | 21.103 | 54.188 |
| H | 54.722 | 19.759 | 53.807 |
| O | 56.125 | 28.028 | 55.903 |
| H | 56.79  | 27.462 | 55.513 |
| H | 55.461 | 27.424 | 56.236 |
| O | 42.154 | 16.923 | 48.884 |
| H | 42.358 | 16.167 | 48.335 |
| H | 42.998 | 17.189 | 49.25  |
| O | 43.792 | 25.141 | 59.792 |
| H | 44.327 | 25.888 | 59.522 |
| H | 43.896 | 25.104 | 60.743 |
| O | 60.546 | 28.483 | 52.18  |
| H | 59.685 | 28.216 | 52.499 |
| H | 60.883 | 29.067 | 52.859 |
| O | 58.332 | 24.393 | 57.415 |

|   |        |        |        |
|---|--------|--------|--------|
| H | 58.848 | 23.619 | 57.19  |
| H | 58.273 | 24.372 | 58.37  |
| O | 58.53  | 24.883 | 60.442 |
| H | 59.146 | 25.604 | 60.312 |
| H | 57.985 | 25.162 | 61.178 |
| O | 54.053 | 16.264 | 51.466 |
| H | 53.114 | 16.085 | 51.523 |
| H | 54.461 | 15.565 | 51.977 |
| O | 49.948 | 14.453 | 53.518 |
| H | 50.569 | 14.701 | 54.203 |
| H | 49.088 | 14.555 | 53.926 |
| O | 57.198 | 18.799 | 62.071 |
| H | 56.534 | 19.487 | 62.126 |
| H | 57.02  | 18.233 | 62.821 |
| O | 52.922 | 18.914 | 49.938 |
| H | 52.292 | 18.373 | 49.461 |
| H | 52.507 | 19.075 | 50.785 |
| O | 44.718 | 22.282 | 58.736 |
| H | 44.1   | 22.547 | 59.417 |
| H | 45.028 | 23.106 | 58.36  |
| O | 51.307 | 16.318 | 51.487 |
| H | 50.637 | 16.297 | 50.804 |
| H | 50.911 | 15.855 | 52.225 |
| O | 53.036 | 15.738 | 57.92  |
| H | 53.233 | 16.6   | 57.553 |
| H | 53.26  | 15.816 | 58.847 |
| O | 47.436 | 12.353 | 56.787 |
| H | 48.141 | 12.97  | 56.59  |
| H | 47.575 | 11.628 | 56.178 |
| O | 46.686 | 23.313 | 54.032 |
| H | 47.239 | 22.55  | 53.864 |
| H | 47.185 | 23.838 | 54.657 |
| O | 55.976 | 31.901 | 57.162 |
| H | 56.046 | 31.514 | 58.034 |
| H | 56.828 | 31.734 | 56.757 |
| O | 60.337 | 17.109 | 53.296 |
| H | 61.266 | 17.337 | 53.329 |
| H | 60.186 | 16.605 | 54.096 |
| O | 52.036 | 18.762 | 52.41  |
| H | 52.404 | 18.61  | 53.28  |
| H | 52.105 | 17.916 | 51.969 |
| O | 49.928 | 15.165 | 48.32  |
| H | 49.111 | 14.818 | 48.678 |
| H | 50.003 | 14.76  | 47.456 |
| O | 50.048 | 32.477 | 53.757 |
| H | 49.254 | 32.099 | 54.135 |
| H | 50.728 | 32.303 | 54.408 |



|   |        |        |        |
|---|--------|--------|--------|
| O | 48.372 | 32.899 | 51.399 |
| H | 48.757 | 32.612 | 50.571 |
| H | 48.791 | 32.35  | 52.062 |
| O | 59.849 | 16.466 | 62.299 |
| H | 59.942 | 17.414 | 62.397 |
| H | 59.295 | 16.359 | 61.525 |
| O | 60.264 | 9.81   | 55.406 |
| H | 61.062 | 10.145 | 54.997 |
| H | 60.572 | 9.337  | 56.179 |
| O | 55.335 | 10.27  | 54.416 |
| H | 54.567 | 10.836 | 54.329 |
| H | 55.79  | 10.353 | 53.579 |
| O | 49.925 | 26.393 | 57.974 |
| H | 48.982 | 26.321 | 57.826 |
| H | 50.292 | 26.563 | 57.106 |
| O | 55.698 | 18.486 | 50.491 |
| H | 55.276 | 17.627 | 50.53  |
| H | 55.008 | 19.103 | 50.736 |
| O | 50.728 | 13.309 | 62.466 |
| H | 51.61  | 12.937 | 62.439 |
| H | 50.783 | 14.094 | 61.921 |
| O | 52.257 | 23.273 | 46.814 |
| H | 51.574 | 22.69  | 46.482 |
| H | 53.046 | 23.011 | 46.34  |
| O | 60.355 | 16.702 | 58.195 |
| H | 61.247 | 16.879 | 58.492 |
| H | 59.81  | 17.304 | 58.703 |
| O | 52.366 | 13.249 | 57.283 |
| H | 52.569 | 12.82  | 58.114 |
| H | 52.623 | 14.161 | 57.416 |
| O | 56.226 | 26.27  | 61.874 |
| H | 55.953 | 26.744 | 62.659 |
| H | 55.941 | 26.824 | 61.148 |
| O | 55.555 | 24.745 | 56.234 |
| H | 55.289 | 25.068 | 57.095 |
| H | 56.434 | 24.393 | 56.372 |
| O | 57.58  | 16.354 | 53.23  |
| H | 57.008 | 16.997 | 52.81  |
| H | 58.459 | 16.723 | 53.144 |
| O | 54.067 | 7.496  | 54.835 |
| H | 54.65  | 7.059  | 54.213 |
| H | 54.155 | 8.427  | 54.633 |
| O | 52.282 | 25.194 | 50.944 |
| H | 51.782 | 24.717 | 50.282 |
| H | 52.69  | 24.51  | 51.475 |
| O | 58.509 | 13.056 | 48.395 |
| H | 57.65  | 12.691 | 48.605 |

|   |        |        |        |
|---|--------|--------|--------|
| H | 59.01  | 12.969 | 49.206 |
| O | 51.039 | 27.314 | 55.332 |
| H | 51.339 | 27.232 | 54.426 |
| H | 50.368 | 27.995 | 55.301 |
| O | 54.028 | 24.943 | 53.982 |
| H | 53.691 | 24.047 | 53.983 |
| H | 54.564 | 24.998 | 54.774 |
| O | 58.505 | 26.621 | 55.443 |
| H | 58.71  | 26.005 | 56.146 |
| H | 58.577 | 26.103 | 54.642 |
| O | 47.609 | 18.684 | 46.86  |
| H | 48.177 | 18.045 | 46.429 |
| H | 47.177 | 18.188 | 47.555 |
| O | 50.187 | 21.669 | 55.975 |
| H | 51.038 | 21.85  | 55.577 |
| H | 50.377 | 21.038 | 56.669 |
| O | 48.863 | 6.421  | 60.326 |
| H | 49.251 | 7.001  | 60.981 |
| H | 49.162 | 6.774  | 59.488 |
| O | 49.609 | 29.288 | 54.133 |
| H | 48.961 | 28.642 | 53.851 |
| H | 49.107 | 30.093 | 54.257 |
| O | 53.682 | 26.41  | 48.366 |
| H | 53.221 | 25.619 | 48.645 |
| H | 53.27  | 27.116 | 48.864 |
| O | 51.539 | 19.591 | 46.195 |
| H | 51.942 | 19.715 | 45.335 |
| H | 52.173 | 19.956 | 46.812 |
| O | 58.459 | 24.178 | 53.822 |
| H | 58.785 | 23.999 | 52.941 |
| H | 58.165 | 23.327 | 54.147 |
| O | 50.574 | 22.655 | 62.825 |
| H | 50.59  | 21.935 | 62.195 |
| H | 50.848 | 22.258 | 63.651 |
| O | 48.798 | 25.429 | 50.281 |
| H | 49.261 | 26.221 | 50.555 |
| H | 49.05  | 25.31  | 49.365 |
| O | 52.062 | 13.113 | 51.557 |
| H | 52.757 | 13.201 | 52.21  |
| H | 51.263 | 13.357 | 52.024 |
| O | 52.278 | 22.672 | 54.611 |
| H | 52.961 | 22.045 | 54.374 |
| H | 51.633 | 22.6   | 53.908 |
| O | 50.608 | 25.227 | 47.752 |
| H | 49.696 | 25.032 | 47.537 |
| H | 51.085 | 24.431 | 47.517 |
| O | 58.045 | 29.351 | 60.335 |

|   |        |        |        |
|---|--------|--------|--------|
| H | 58.447 | 29.473 | 61.195 |
| H | 57.418 | 30.07  | 60.26  |
| O | 46.376 | 26.465 | 51.626 |
| H | 46.734 | 27.151 | 51.061 |
| H | 46.866 | 26.549 | 52.444 |
| O | 55.186 | 26.929 | 52.606 |
| H | 54.779 | 26.124 | 52.925 |
| H | 54.495 | 27.366 | 52.108 |
| O | 52.192 | 30.227 | 49.456 |
| H | 53.057 | 30.352 | 49.844 |
| H | 52.37  | 30.006 | 48.541 |
| O | 51.26  | 17.48  | 48.032 |
| H | 50.832 | 16.625 | 47.99  |
| H | 51.01  | 17.913 | 47.216 |
| O | 49.172 | 20.919 | 46.778 |
| H | 48.348 | 20.432 | 46.774 |
| H | 49.846 | 20.251 | 46.65  |
| O | 58.902 | 23.505 | 47.11  |
| H | 59.552 | 22.806 | 47.183 |
| H | 59.119 | 24.11  | 47.819 |
| O | 52.257 | 20.837 | 43.665 |
| H | 51.481 | 21.312 | 43.366 |
| H | 52.902 | 21.521 | 43.842 |
| O | 49.007 | 14.162 | 45.585 |
| H | 48.783 | 14.87  | 44.982 |
| H | 49.488 | 13.533 | 45.047 |
| O | 57.992 | 10.535 | 42.719 |
| H | 57.953 | 11.203 | 42.035 |
| H | 57.303 | 10.783 | 43.336 |
| O | 49.98  | 30.725 | 50.774 |
| H | 50.767 | 30.739 | 50.23  |
| H | 50.086 | 29.952 | 51.329 |
| O | 52.098 | 27.129 | 45.94  |
| H | 52.928 | 26.706 | 46.16  |
| H | 51.541 | 26.416 | 45.627 |
| O | 50.251 | 35.1   | 57.686 |
| H | 51.109 | 35.28  | 57.302 |
| H | 49.701 | 35.827 | 57.393 |
| O | 47.85  | 27.077 | 53.831 |
| H | 48.438 | 26.322 | 53.823 |
| H | 47.392 | 27.016 | 54.67  |
| O | 48.939 | 15.742 | 62.005 |
| H | 49.212 | 15.749 | 62.922 |
| H | 48.039 | 16.065 | 62.02  |
| O | 45.048 | 8.244  | 51.875 |
| H | 45.92  | 7.983  | 52.17  |
| H | 45.037 | 8.03   | 50.942 |

|   |        |        |        |
|---|--------|--------|--------|
| O | 57.043 | 22.292 | 51.269 |
| H | 56.688 | 22.376 | 50.383 |
| H | 57.963 | 22.542 | 51.183 |
| O | 60.106 | 14.569 | 46.401 |
| H | 59.401 | 14.327 | 45.799 |
| H | 59.657 | 14.957 | 47.152 |
| O | 49.68  | 14.064 | 56.745 |
| H | 50.612 | 13.846 | 56.734 |
| H | 49.626 | 14.861 | 57.273 |
| O | 60.527 | 32.303 | 66.241 |
| H | 61.066 | 32.352 | 65.452 |
| H | 60.476 | 33.206 | 66.553 |
| O | 59.202 | 20.38  | 51.998 |
| H | 59.801 | 20.414 | 51.253 |
| H | 58.357 | 20.142 | 51.616 |
| O | 62.978 | 19.58  | 55.965 |
| H | 63.487 | 19.154 | 56.655 |
| H | 62.256 | 20.004 | 56.428 |
| O | 42.185 | 24.781 | 57.665 |
| H | 41.959 | 25.697 | 57.507 |
| H | 42.98  | 24.818 | 58.197 |
| O | 42.744 | 20.935 | 43.643 |
| H | 42.968 | 20.57  | 44.499 |
| H | 42.246 | 20.242 | 43.21  |
| O | 56.506 | 10.796 | 51.88  |
| H | 56.597 | 11.086 | 50.972 |
| H | 57.389 | 10.533 | 52.137 |
| O | 49.06  | 35.763 | 51.366 |
| H | 49.057 | 34.824 | 51.18  |
| H | 48.587 | 35.844 | 52.194 |
| O | 45.177 | 11.336 | 53.43  |
| H | 45.206 | 10.857 | 52.602 |
| H | 45.992 | 11.099 | 53.872 |
| O | 50.215 | 5.931  | 47.83  |
| H | 49.471 | 6.529  | 47.901 |
| H | 50.129 | 5.351  | 48.587 |
| O | 57.221 | 32.759 | 39.313 |
| H | 56.342 | 32.58  | 38.981 |
| H | 57.773 | 32.095 | 38.9   |
| O | 44.794 | 21.479 | 53.199 |
| H | 45.118 | 20.703 | 53.655 |
| H | 45.425 | 22.165 | 53.416 |
| O | 61.232 | 28.13  | 44.339 |
| H | 60.987 | 27.671 | 45.143 |
| H | 60.582 | 27.849 | 43.695 |
| O | 54.284 | 25.039 | 34.319 |
| H | 53.973 | 24.302 | 34.845 |

|   |        |        |        |
|---|--------|--------|--------|
| H | 53.548 | 25.651 | 34.306 |
| O | 49.93  | 28.278 | 39.983 |
| H | 49.713 | 29.201 | 39.848 |
| H | 50.384 | 28.26  | 40.825 |
| O | 55.609 | 25.347 | 31.195 |
| H | 56.146 | 25.101 | 31.949 |
| H | 56.24  | 25.643 | 30.538 |
| O | 47.389 | 22.81  | 40.715 |
| H | 46.727 | 23.253 | 41.246 |
| H | 47.383 | 23.28  | 39.882 |
| O | 60.489 | 28.788 | 37.961 |
| H | 61.356 | 28.409 | 38.109 |
| H | 60.47  | 28.981 | 37.023 |
| O | 51.01  | 23.37  | 38.705 |
| H | 51.558 | 24.026 | 38.275 |
| H | 50.122 | 23.721 | 38.641 |
| O | 51.705 | 13.893 | 36.92  |
| H | 52.044 | 14.723 | 36.587 |
| H | 52.306 | 13.233 | 36.575 |
| O | 59.661 | 14.941 | 37.698 |
| H | 58.955 | 15.307 | 37.165 |
| H | 59.234 | 14.275 | 38.237 |
| O | 45.223 | 18.774 | 31.665 |
| H | 45.925 | 19.293 | 31.273 |
| H | 44.426 | 19.09  | 31.24  |
| O | 41.946 | 17.309 | 39.637 |
| H | 41.48  | 17.47  | 38.817 |
| H | 42.809 | 16.998 | 39.366 |
| O | 50.599 | 19.382 | 33.029 |
| H | 50.331 | 20.081 | 33.625 |
| H | 50.899 | 18.679 | 33.606 |
| O | 52.127 | 6.164  | 41.543 |
| H | 51.869 | 5.768  | 40.711 |
| H | 53.071 | 6.013  | 41.598 |
| O | 53.783 | 20.436 | 40.176 |
| H | 53.599 | 19.816 | 40.881 |
| H | 54.474 | 20.018 | 39.663 |
| O | 51.24  | 20.821 | 38.93  |
| H | 52.187 | 20.722 | 39.032 |
| H | 51.099 | 21.767 | 38.903 |
| O | 63.662 | 9.646  | 36.904 |
| H | 63.004 | 10.116 | 36.392 |
| H | 63.493 | 8.722  | 36.72  |
| O | 55.387 | 24.626 | 41.138 |
| H | 54.86  | 25.18  | 41.714 |
| H | 54.745 | 24.145 | 40.616 |
| O | 48.946 | 26.506 | 30.696 |

|   |        |        |        |
|---|--------|--------|--------|
| H | 48.771 | 27.064 | 31.453 |
| H | 49.782 | 26.085 | 30.896 |
| O | 62.568 | 16.326 | 31.468 |
| H | 62.987 | 15.503 | 31.718 |
| H | 61.732 | 16.063 | 31.083 |
| O | 58.027 | 16.511 | 36.175 |
| H | 57.903 | 17.459 | 36.119 |
| H | 58.235 | 16.243 | 35.28  |
| O | 59.467 | 14.075 | 32.27  |
| H | 58.921 | 13.939 | 33.044 |
| H | 59.011 | 13.61  | 31.569 |
| O | 50.741 | 16.049 | 41.45  |
| H | 51.044 | 16.698 | 40.815 |
| H | 49.828 | 16.282 | 41.614 |
| O | 52.09  | 27.126 | 34.913 |
| H | 52.018 | 28.063 | 34.728 |
| H | 51.242 | 26.765 | 34.655 |
| O | 54.115 | 22.389 | 45.17  |
| H | 54.715 | 21.681 | 45.405 |
| H | 54.592 | 22.9   | 44.516 |
| O | 59.046 | 25.112 | 44.835 |
| H | 58.778 | 24.325 | 45.31  |
| H | 59.648 | 25.558 | 45.431 |
| O | 47.111 | 20.19  | 39.394 |
| H | 48.025 | 19.985 | 39.199 |
| H | 47.147 | 21.023 | 39.865 |
| O | 63.209 | 21.932 | 40.856 |
| H | 64.121 | 22.17  | 40.685 |
| H | 62.774 | 22.027 | 40.009 |
| O | 52.786 | 25.585 | 37.569 |
| H | 52.401 | 26.371 | 37.182 |
| H | 53.608 | 25.887 | 37.955 |
| O | 46.166 | 18.298 | 37.708 |
| H | 46.315 | 18.976 | 38.367 |
| H | 45.238 | 18.082 | 37.793 |
| O | 47.786 | 25.252 | 47.344 |
| H | 47.766 | 24.81  | 46.495 |
| H | 46.865 | 25.404 | 47.557 |
| O | 48.541 | 24.347 | 37.818 |
| H | 47.767 | 24.064 | 37.331 |
| H | 48.354 | 25.254 | 38.058 |
| O | 54.026 | 30.928 | 34.544 |
| H | 53.115 | 30.701 | 34.358 |
| H | 54.428 | 31.03  | 33.681 |
| O | 43.977 | 23.553 | 43.789 |
| H | 43.174 | 23.989 | 43.502 |
| H | 43.762 | 22.62  | 43.77  |

|   |        |        |        |
|---|--------|--------|--------|
| O | 46.88  | 20.139 | 43.501 |
| H | 46.743 | 19.192 | 43.474 |
| H | 46.49  | 20.413 | 44.331 |
| O | 56.614 | 17.751 | 41.532 |
| H | 56.959 | 18.358 | 42.187 |
| H | 55.693 | 17.996 | 41.439 |
| O | 60.945 | 8.026  | 34.185 |
| H | 60.67  | 7.52   | 34.95  |
| H | 61.588 | 8.647  | 34.528 |
| O | 57.984 | 19.912 | 43.097 |
| H | 58.487 | 20.418 | 42.459 |
| H | 58.594 | 19.241 | 43.406 |
| O | 52.858 | 22.976 | 34.885 |
| H | 52.483 | 22.805 | 34.021 |
| H | 52.137 | 23.356 | 35.387 |
| O | 55.762 | 16.637 | 44.348 |
| H | 55.151 | 16.283 | 43.703 |
| H | 56.626 | 16.511 | 43.955 |
| O | 63.404 | 13.049 | 31.725 |
| H | 62.643 | 12.493 | 31.891 |
| H | 63.957 | 12.531 | 31.141 |
| O | 46.211 | 24.814 | 42.763 |
| H | 45.467 | 24.226 | 42.893 |
| H | 46.708 | 24.755 | 43.579 |
| O | 56.61  | 18.097 | 46.855 |
| H | 56.612 | 17.635 | 46.017 |
| H | 56.641 | 17.402 | 47.512 |
| O | 45.108 | 12.402 | 38.771 |
| H | 44.272 | 12.863 | 38.845 |
| H | 45.571 | 12.855 | 38.067 |
| O | 43.701 | 10.282 | 32.815 |
| H | 43.454 | 9.453  | 33.226 |
| H | 43.127 | 10.931 | 33.221 |
| O | 62.221 | 23.997 | 45.894 |
| H | 62.997 | 23.497 | 46.15  |
| H | 61.563 | 23.332 | 45.693 |
| O | 60.848 | 14.787 | 29.846 |
| H | 60.847 | 14.231 | 30.625 |
| H | 60.824 | 14.173 | 29.113 |
| O | 57.553 | 12.989 | 41.759 |
| H | 57.113 | 13.602 | 41.17  |
| H | 57.619 | 13.459 | 42.59  |
| O | 62.33  | 10.847 | 34.708 |
| H | 62.306 | 10.751 | 33.756 |
| H | 61.635 | 11.476 | 34.904 |
| O | 50.65  | 19.5   | 36.737 |
| H | 50.144 | 18.731 | 36.999 |

|   |        |        |        |
|---|--------|--------|--------|
| H | 51.015 | 19.837 | 37.555 |
| O | 49.227 | 23.392 | 45.238 |
| H | 49.121 | 22.947 | 44.397 |
| H | 48.793 | 22.819 | 45.869 |
| O | 64.583 | 26.046 | 33.543 |
| H | 65.266 | 25.724 | 32.956 |
| H | 63.875 | 26.319 | 32.96  |
| O | 47.103 | 12.615 | 32.225 |
| H | 47.026 | 11.712 | 31.916 |
| H | 47.929 | 12.926 | 31.855 |
| O | 56.372 | 22.507 | 47.278 |
| H | 57.286 | 22.774 | 47.374 |
| H | 56.381 | 21.872 | 46.562 |
| O | 50.668 | 18.637 | 40.403 |
| H | 49.926 | 18.393 | 39.849 |
| H | 50.839 | 19.553 | 40.183 |
| O | 59.872 | 15.67  | 26.575 |
| H | 60.23  | 16.546 | 26.433 |
| H | 60.509 | 15.082 | 26.17  |
| O | 53.773 | 26.354 | 43.391 |
| H | 53.092 | 25.738 | 43.662 |
| H | 54.533 | 26.121 | 43.924 |
| O | 55.814 | 15.474 | 37.593 |
| H | 56.317 | 15.31  | 38.39  |
| H | 56.44  | 15.885 | 36.996 |
| O | 56.354 | 23.864 | 37.641 |
| H | 55.514 | 23.689 | 38.065 |
| H | 56.31  | 23.381 | 36.816 |
| O | 52.715 | 28.069 | 51.337 |
| H | 52.396 | 27.172 | 51.231 |
| H | 52.192 | 28.583 | 50.722 |
| O | 57.441 | 19.336 | 36.28  |
| H | 56.905 | 19.29  | 37.072 |
| H | 58.222 | 19.82  | 36.549 |
| O | 61.114 | 21.622 | 46.981 |
| H | 61.901 | 21.163 | 46.688 |
| H | 60.608 | 20.957 | 47.447 |
| O | 56.669 | 29.269 | 35.33  |
| H | 56.972 | 29.555 | 36.191 |
| H | 56.63  | 28.314 | 35.395 |
| O | 49.399 | 16.01  | 31.351 |
| H | 50.157 | 16.229 | 31.894 |
| H | 48.845 | 16.79  | 31.389 |
| O | 50.102 | 23.798 | 35.197 |
| H | 49.922 | 24.239 | 36.027 |
| H | 49.999 | 24.482 | 34.535 |
| O | 58.495 | 30.51  | 33.331 |



|   |        |        |        |
|---|--------|--------|--------|
| H | 57.991 | 30.104 | 34.036 |
| H | 58.687 | 31.392 | 33.651 |
| O | 49.661 | 13.312 | 31.211 |
| H | 49.328 | 14.139 | 31.558 |
| H | 49.459 | 13.345 | 30.276 |
| O | 46.823 | 21.018 | 31.795 |
| H | 46.878 | 21.632 | 32.527 |
| H | 46.674 | 21.572 | 31.029 |
| O | 45.706 | 10.878 | 50.608 |
| H | 45.474 | 9.951  | 50.55  |
| H | 45.09  | 11.316 | 50.021 |
| O | 42.493 | 25.489 | 41.791 |
| H | 42.518 | 24.677 | 41.285 |
| H | 43.313 | 25.933 | 41.573 |
| O | 56.061 | 25.143 | 47.636 |
| H | 55.135 | 25.335 | 47.781 |
| H | 56.083 | 24.208 | 47.432 |
| O | 58.109 | 19.836 | 29.187 |
| H | 58.34  | 18.986 | 29.561 |
| H | 57.226 | 20.01  | 29.513 |
| O | 54.85  | 28.375 | 33.286 |
| H | 55.485 | 28.623 | 33.958 |
| H | 54.029 | 28.776 | 33.572 |
| O | 55.927 | 19.697 | 34.077 |
| H | 56.585 | 19.324 | 33.49  |
| H | 56.244 | 19.488 | 34.956 |
| O | 55.575 | 22.075 | 35.797 |
| H | 55.532 | 21.39  | 35.129 |
| H | 54.663 | 22.33  | 35.937 |
| O | 59.493 | 18.517 | 44.719 |
| H | 59.586 | 19.156 | 45.426 |
| H | 60.388 | 18.23  | 44.537 |
| O | 55.294 | 35.237 | 32.921 |
| H | 54.567 | 35.168 | 32.302 |
| H | 55.956 | 34.634 | 32.583 |
| O | 47.657 | 11.195 | 29.476 |
| H | 47.023 | 10.568 | 29.824 |
| H | 47.261 | 11.511 | 28.664 |
| O | 55.265 | 21.736 | 32.121 |
| H | 55.979 | 22.365 | 32.013 |
| H | 55.595 | 21.107 | 32.762 |
| O | 46.398 | 17.451 | 27.403 |
| H | 45.886 | 17.773 | 28.145 |
| H | 46.039 | 16.582 | 27.223 |
| O | 49.775 | 33.172 | 32.872 |
| H | 49.017 | 33.529 | 32.41  |
| H | 50.447 | 33.082 | 32.196 |

|   |        |        |        |
|---|--------|--------|--------|
| O | 44.494 | 33.312 | 34.108 |
| H | 44.366 | 32.498 | 34.596 |
| H | 44.042 | 33.976 | 34.628 |
| O | 40.304 | 36.413 | 48.514 |
| H | 39.956 | 37.305 | 48.55  |
| H | 39.965 | 35.993 | 49.305 |
| O | 57.119 | 23.707 | 32.74  |
| H | 57.874 | 23.118 | 32.743 |
| H | 56.724 | 23.594 | 33.604 |
| O | 48.649 | 18.284 | 50.636 |
| H | 48.157 | 18.118 | 51.44  |
| H | 49.56  | 18.351 | 50.923 |
| O | 52.171 | 22.107 | 32.318 |
| H | 53.054 | 21.743 | 32.383 |
| H | 52.204 | 22.681 | 31.553 |
| O | 57.824 | 28.567 | 49.34  |
| H | 57.896 | 29.514 | 49.216 |
| H | 57.405 | 28.252 | 48.539 |
| O | 58.239 | 17.298 | 29.772 |
| H | 59.059 | 16.828 | 29.618 |
| H | 57.595 | 16.84  | 29.232 |
| O | 53.368 | 18.12  | 34.595 |
| H | 53.829 | 18.952 | 34.698 |
| H | 53.784 | 17.708 | 33.838 |
| O | 58.875 | 27.164 | 35.362 |
| H | 59.38  | 27     | 36.159 |
| H | 58.056 | 26.686 | 35.496 |
| O | 45.916 | 20.588 | 45.976 |
| H | 44.969 | 20.602 | 46.118 |
| H | 46.227 | 19.859 | 46.513 |
| O | 55.101 | 18.96  | 30.646 |
| H | 54.158 | 19.103 | 30.731 |
| H | 55.494 | 19.599 | 31.241 |
| O | 52.816 | 13.827 | 48.945 |
| H | 51.981 | 14.27  | 48.796 |
| H | 52.758 | 13.502 | 49.843 |
| O | 53.183 | 16.114 | 36.601 |
| H | 54.053 | 15.722 | 36.672 |
| H | 53.21  | 16.611 | 35.783 |
| O | 57.456 | 22.632 | 41.229 |
| H | 56.596 | 23.013 | 41.406 |
| H | 58.059 | 23.375 | 41.258 |
| O | 57.855 | 21.065 | 38.855 |
| H | 57.394 | 21.531 | 39.552 |
| H | 58.307 | 21.752 | 38.365 |
| O | 55.942 | 16.918 | 28.031 |
| H | 55.331 | 16.245 | 28.333 |

|   |        |        |        |
|---|--------|--------|--------|
| H | 55.604 | 17.182 | 27.175 |
| O | 52.795 | 29.815 | 46.8   |
| H | 52.696 | 28.904 | 46.523 |
| H | 53.087 | 30.274 | 46.012 |
| O | 53.714 | 19.886 | 47.367 |
| H | 53.445 | 19.612 | 48.243 |
| H | 54.595 | 19.527 | 47.263 |
| O | 56.532 | 15.018 | 31.35  |
| H | 57.467 | 14.872 | 31.21  |
| H | 56.131 | 14.84  | 30.5   |
| O | 51.614 | 24.729 | 44.32  |
| H | 51.405 | 24.801 | 43.388 |
| H | 50.877 | 24.245 | 44.693 |
| O | 58.364 | 12.663 | 30.264 |
| H | 58.677 | 11.76  | 30.215 |
| H | 58.248 | 12.927 | 29.351 |
| O | 58.462 | 26.456 | 30.914 |
| H | 58.973 | 26.4   | 31.722 |
| H | 57.813 | 27.138 | 31.088 |
| O | 46.499 | 23.239 | 33.737 |
| H | 46.431 | 24.097 | 33.318 |
| H | 47.431 | 23.14  | 33.929 |
| O | 48.038 | 32.928 | 40.679 |
| H | 47.278 | 33.149 | 41.218 |
| H | 48.208 | 33.719 | 40.168 |
| O | 49.089 | 26.474 | 35.23  |
| H | 48.174 | 26.38  | 34.963 |
| H | 49.043 | 26.829 | 36.118 |
| O | 51.735 | 29.694 | 33.912 |
| H | 50.927 | 30.161 | 34.128 |
| H | 51.615 | 29.414 | 33.005 |
| O | 45.897 | 16.567 | 33.554 |
| H | 45.86  | 17.09  | 32.752 |
| H | 46.363 | 17.121 | 34.179 |
| O | 44.775 | 20.88  | 41.221 |
| H | 45.663 | 21.122 | 41.484 |
| H | 44.524 | 20.188 | 41.834 |
| O | 48.747 | 17.487 | 38.742 |
| H | 47.8   | 17.43  | 38.614 |
| H | 49.064 | 16.597 | 38.584 |
| O | 54.004 | 16.901 | 39.228 |
| H | 54.338 | 16.126 | 38.776 |
| H | 53.261 | 17.186 | 38.696 |
| O | 45.649 | 15.213 | 26.364 |
| H | 44.854 | 14.8   | 26.703 |
| H | 46.237 | 14.481 | 26.179 |
| O | 53.149 | 12.222 | 28.86  |

|   |        |        |        |
|---|--------|--------|--------|
| H | 53.799 | 11.871 | 28.252 |
| H | 53.515 | 12.05  | 29.728 |
| O | 45.129 | 14.038 | 33.52  |
| H | 45.921 | 13.54  | 33.32  |
| H | 45.392 | 14.954 | 33.429 |
| O | 53.918 | 13.76  | 40.46  |
| H | 54.233 | 13.303 | 39.68  |
| H | 52.978 | 13.579 | 40.481 |
| O | 55.714 | 28.461 | 47.395 |
| H | 55.16  | 27.775 | 47.769 |
| H | 55.388 | 29.271 | 47.785 |
| O | 52.751 | 18.487 | 42.078 |
| H | 51.921 | 18.498 | 41.602 |
| H | 52.584 | 19.007 | 42.863 |
| O | 60.988 | 19.712 | 36.911 |
| H | 61.574 | 19.239 | 36.32  |
| H | 60.764 | 19.073 | 37.588 |
| O | 45.86  | 11.629 | 44.426 |
| H | 45.074 | 11.925 | 44.884 |
| H | 45.995 | 12.279 | 43.736 |
| O | 46.982 | 28.632 | 41.94  |
| H | 47.686 | 29.247 | 42.147 |
| H | 46.297 | 29.175 | 41.55  |
| O | 57.302 | 26.434 | 40.13  |
| H | 58.097 | 26.323 | 40.653 |
| H | 56.709 | 25.754 | 40.45  |
| O | 51.363 | 32.428 | 35.001 |
| H | 50.556 | 32.586 | 34.51  |
| H | 51.923 | 33.173 | 34.787 |
| O | 55.05  | 27.051 | 38.463 |
| H | 54.658 | 27.334 | 39.289 |
| H | 55.93  | 26.761 | 38.702 |
| O | 51.446 | 13.383 | 40.947 |
| H | 51.246 | 13.129 | 41.847 |
| H | 51.18  | 14.301 | 40.893 |
| O | 45.543 | 35.331 | 32.65  |
| H | 44.761 | 35.45  | 32.11  |
| H | 45.38  | 34.519 | 33.131 |
| O | 54.731 | 16.901 | 32.333 |
| H | 55.429 | 16.247 | 32.314 |
| H | 54.819 | 17.371 | 31.504 |
| O | 52.376 | 19.329 | 30.995 |
| H | 51.845 | 19.328 | 31.792 |
| H | 51.749 | 19.178 | 30.289 |
| O | 44.074 | 22.497 | 33.448 |
| H | 43.574 | 23.199 | 33.864 |
| H | 44.98  | 22.657 | 33.715 |

|   |        |        |        |
|---|--------|--------|--------|
| O | 59.915 | 8.505  | 28.435 |
| H | 59.823 | 9.354  | 28.003 |
| H | 59.127 | 8.423  | 28.972 |
| O | 49.345 | 16.665 | 34.258 |
| H | 48.886 | 15.882 | 34.561 |
| H | 48.722 | 17.378 | 34.4   |
| O | 59.148 | 24.643 | 42.072 |
| H | 58.791 | 25.096 | 42.836 |
| H | 59.625 | 23.898 | 42.436 |
| O | 53.929 | 15.844 | 42.423 |
| H | 53.741 | 15.17  | 41.771 |
| H | 53.406 | 16.597 | 42.148 |
| O | 53.291 | 26.82  | 31.531 |
| H | 53.646 | 27.255 | 32.306 |
| H | 53.959 | 26.179 | 31.288 |
| O | 47.976 | 34.22  | 31.157 |
| H | 48.303 | 33.843 | 30.34  |
| H | 47.599 | 35.061 | 30.899 |
| O | 55.574 | 21.611 | 20.852 |
| H | 55.224 | 22.167 | 20.156 |
| H | 55.818 | 22.222 | 21.547 |
| O | 51.296 | 16.114 | 23.916 |
| H | 50.634 | 16.749 | 23.641 |
| H | 51.125 | 15.977 | 24.848 |
| O | 52.807 | 28.423 | 21.711 |
| H | 53.708 | 28.201 | 21.476 |
| H | 52.592 | 29.171 | 21.155 |
| O | 45.753 | 16.861 | 20.062 |
| H | 46.569 | 16.499 | 20.407 |
| H | 45.139 | 16.809 | 20.794 |
| O | 48.303 | 22.355 | 22.888 |
| H | 48.438 | 22.816 | 23.715 |
| H | 48.696 | 22.927 | 22.228 |
| O | 59.161 | 19.759 | 5.774  |
| H | 58.547 | 19.03  | 5.686  |
| H | 58.637 | 20.538 | 5.588  |
| O | 54.655 | 18.635 | 20.956 |
| H | 55.044 | 18.352 | 21.784 |
| H | 54.892 | 19.559 | 20.883 |
| O | 43.205 | 17.387 | 15.096 |
| H | 43.87  | 17.256 | 15.772 |
| H | 42.603 | 18.028 | 15.473 |
| O | 59.495 | 20.62  | 12.541 |
| H | 59.055 | 20.912 | 11.743 |
| H | 59.816 | 21.426 | 12.946 |
| O | 50.22  | 27.224 | 21.293 |
| H | 50.192 | 27.963 | 20.685 |

|   |        |        |        |
|---|--------|--------|--------|
| H | 51.106 | 27.246 | 21.655 |
| O | 54.052 | 15.312 | 23.581 |
| H | 54.523 | 15.786 | 22.895 |
| H | 53.142 | 15.596 | 23.486 |
| O | 57.056 | 20.022 | 26.686 |
| H | 57.554 | 20.113 | 27.498 |
| H | 57.572 | 19.414 | 26.156 |
| O | 52.239 | 22.641 | 22.728 |
| H | 52.225 | 21.723 | 22.996 |
| H | 53.121 | 22.942 | 22.948 |
| O | 58.056 | 23.038 | 22.362 |
| H | 57.963 | 23.732 | 23.014 |
| H | 57.821 | 22.237 | 22.83  |
| O | 55.38  | 15.389 | 20.935 |
| H | 55.914 | 16.175 | 20.816 |
| H | 56.014 | 14.674 | 20.985 |
| O | 48.47  | 12.657 | 21.981 |
| H | 48     | 12.138 | 22.635 |
| H | 48.594 | 12.058 | 21.245 |
| O | 45.462 | 12.277 | 19.338 |
| H | 46.231 | 12.309 | 18.769 |
| H | 44.744 | 12.589 | 18.787 |
| O | 46.866 | 20.028 | 9.932  |
| H | 45.967 | 20.083 | 9.606  |
| H | 47.028 | 20.883 | 10.331 |
| O | 53.882 | 12.823 | 18.221 |
| H | 53.139 | 13.07  | 17.669 |
| H | 53.946 | 13.528 | 18.865 |
| O | 60.393 | 21.177 | 19.917 |
| H | 60.532 | 22.123 | 19.939 |
| H | 61.256 | 20.804 | 20.101 |
| O | 55.416 | 17.069 | 8.29   |
| H | 55.1   | 16.971 | 7.392  |
| H | 56.369 | 17.027 | 8.215  |
| O | 50.017 | 23.682 | 21.09  |
| H | 50.307 | 24.503 | 20.692 |
| H | 50.783 | 23.364 | 21.567 |
| O | 61.706 | 23.923 | 19.354 |
| H | 62.33  | 23.607 | 18.7   |
| H | 61.609 | 24.856 | 19.162 |
| O | 51.22  | 21.083 | 26.958 |
| H | 50.682 | 20.72  | 26.254 |
| H | 50.629 | 21.666 | 27.434 |
| O | 49.453 | 22.266 | 32.107 |
| H | 50.409 | 22.223 | 32.091 |
| H | 49.194 | 21.592 | 32.735 |
| O | 48.664 | 16.435 | 26.064 |

|   |        |        |        |
|---|--------|--------|--------|
| H | 49.243 | 16.522 | 26.822 |
| H | 47.809 | 16.722 | 26.383 |
| O | 58.968 | 27.814 | 21.409 |
| H | 58.948 | 28.096 | 22.323 |
| H | 59.007 | 26.858 | 21.455 |
| O | 53.243 | 21.821 | 25.437 |
| H | 52.658 | 21.486 | 26.116 |
| H | 53.575 | 21.038 | 24.999 |
| O | 45.686 | 17.096 | 16.623 |
| H | 46.079 | 17.94  | 16.845 |
| H | 46.39  | 16.461 | 16.76  |
| O | 49.468 | 26.316 | 24.283 |
| H | 49.878 | 25.485 | 24.524 |
| H | 49.649 | 26.41  | 23.348 |
| O | 51.061 | 25.505 | 17.988 |
| H | 51.936 | 25.588 | 17.608 |
| H | 50.724 | 26.4   | 18.013 |
| O | 57.071 | 29.682 | 20.588 |
| H | 57.675 | 28.985 | 20.846 |
| H | 57.368 | 29.946 | 19.717 |
| O | 46.103 | 19.592 | 25.958 |
| H | 45.673 | 20.241 | 26.515 |
| H | 46.104 | 18.791 | 26.482 |
| O | 54.601 | 14.845 | 29.214 |
| H | 54.541 | 13.95  | 28.882 |
| H | 53.828 | 14.947 | 29.77  |
| O | 54.231 | 19.558 | 28.02  |
| H | 54.648 | 18.989 | 28.667 |
| H | 54.847 | 19.58  | 27.288 |
| O | 55.282 | 15.779 | 14.367 |
| H | 55.133 | 16.541 | 14.926 |
| H | 54.7   | 15.912 | 13.619 |
| O | 59.821 | 18.315 | 18.247 |
| H | 59.32  | 18.929 | 17.71  |
| H | 60.733 | 18.581 | 18.126 |
| O | 49.184 | 17.953 | 23.046 |
| H | 48.478 | 18.285 | 23.6   |
| H | 48.772 | 17.271 | 22.515 |
| O | 64.239 | 19.305 | 26.239 |
| H | 63.514 | 19.812 | 26.605 |
| H | 64.942 | 19.943 | 26.121 |
| O | 50.274 | 15.808 | 18.847 |
| H | 50.741 | 16.594 | 18.563 |
| H | 50.5   | 15.716 | 19.773 |
| O | 48.062 | 14.016 | 24.985 |
| H | 47.847 | 14.69  | 24.339 |
| H | 48.607 | 14.468 | 25.629 |

|   |        |        |        |
|---|--------|--------|--------|
| O | 67.1   | 15.668 | 27.603 |
| H | 67.392 | 16.043 | 28.434 |
| H | 66.591 | 14.897 | 27.854 |
| O | 45.684 | 13.764 | 22.299 |
| H | 45.902 | 13.176 | 21.576 |
| H | 45.539 | 13.183 | 23.046 |
| O | 46.473 | 16.872 | 7.291  |
| H | 45.877 | 16.575 | 6.603  |
| H | 46.328 | 16.261 | 8.013  |
| O | 60.805 | 23.257 | 12.619 |
| H | 60.463 | 23.757 | 13.361 |
| H | 60.302 | 23.571 | 11.867 |
| O | 55.518 | 18.887 | 18.211 |
| H | 56.196 | 19.362 | 18.692 |
| H | 55.051 | 18.39  | 18.882 |
| O | 53.286 | 11.471 | 22.904 |
| H | 53.427 | 10.655 | 22.425 |
| H | 53.138 | 12.127 | 22.223 |
| O | 55.767 | 20.142 | 14.309 |
| H | 55.399 | 20.686 | 13.612 |
| H | 56.41  | 19.589 | 13.866 |
| O | 57.63  | 22.187 | 11.025 |
| H | 57.68  | 22.974 | 11.567 |
| H | 58.235 | 22.355 | 10.302 |
| O | 47.909 | 27.322 | 26.523 |
| H | 47.6   | 26.504 | 26.913 |
| H | 48.717 | 27.081 | 26.07  |
| O | 52.198 | 19.413 | 21.956 |
| H | 51.585 | 18.802 | 22.364 |
| H | 52.723 | 18.87  | 21.369 |
| O | 41.235 | 11.976 | 12.248 |
| H | 40.495 | 11.504 | 12.629 |
| H | 41.87  | 11.292 | 12.033 |
| O | 58.715 | 18.565 | 25.044 |
| H | 59.567 | 18.197 | 25.279 |
| H | 58.904 | 19.473 | 24.806 |
| O | 58.349 | 23.23  | 16.693 |
| H | 57.449 | 23.04  | 16.428 |
| H | 58.738 | 22.37  | 16.851 |
| O | 53.067 | 13.78  | 20.633 |
| H | 52.207 | 14.09  | 20.917 |
| H | 53.656 | 14.515 | 20.807 |
| O | 48.658 | 19.066 | 31.291 |
| H | 47.894 | 19.497 | 31.675 |
| H | 49.318 | 19.087 | 31.984 |
| O | 52.578 | 21.865 | 17.469 |
| H | 52.246 | 21.488 | 18.284 |



|   |        |        |        |
|---|--------|--------|--------|
| H | 52.037 | 21.47  | 16.785 |
| O | 63.698 | 23.807 | 13.886 |
| H | 62.914 | 23.908 | 14.425 |
| H | 63.732 | 24.605 | 13.359 |
| O | 54.095 | 19.652 | 23.953 |
| H | 53.679 | 19.523 | 23.101 |
| H | 54.254 | 18.766 | 24.279 |
| O | 51.667 | 23.208 | 29.808 |
| H | 52.411 | 22.724 | 29.45  |
| H | 50.912 | 22.886 | 29.315 |
| O | 53.71  | 27.618 | 27.542 |
| H | 54.493 | 27.64  | 28.092 |
| H | 53.955 | 27.067 | 26.798 |
| O | 54.103 | 23.453 | 19.152 |
| H | 53.356 | 23.574 | 19.739 |
| H | 53.714 | 23.388 | 18.28  |
| O | 48.816 | 16.265 | 16.457 |
| H | 49.252 | 16.197 | 17.307 |
| H | 49.39  | 16.828 | 15.938 |
| O | 61.414 | 24.642 | 15.074 |
| H | 61.623 | 25.054 | 15.913 |
| H | 60.578 | 25.03  | 14.819 |
| O | 56.491 | 27.153 | 25.712 |
| H | 56.044 | 26.386 | 26.07  |
| H | 57.417 | 26.999 | 25.899 |
| O | 43.306 | 8.148  | 18.4   |
| H | 44.083 | 7.588  | 18.4   |
| H | 43.576 | 8.932  | 17.921 |
| O | 43.606 | 24.41  | 17.88  |
| H | 43.371 | 25.337 | 17.837 |
| H | 44.533 | 24.408 | 18.117 |
| O | 55.748 | 13.893 | 25.922 |
| H | 55.535 | 12.995 | 26.173 |
| H | 54.898 | 14.315 | 25.797 |
| O | 47.267 | 24.843 | 27.707 |
| H | 47.481 | 24.476 | 28.564 |
| H | 46.55  | 24.297 | 27.384 |
| O | 59.765 | 20.993 | 25.17  |
| H | 60.527 | 20.95  | 24.592 |
| H | 60.117 | 21.292 | 26.008 |
| O | 57.083 | 28.512 | 11.506 |
| H | 57.791 | 28.999 | 11.085 |
| H | 57.491 | 28.11  | 12.272 |
| O | 49.733 | 19.124 | 15.656 |
| H | 50.146 | 19.986 | 15.604 |
| H | 50.155 | 18.614 | 14.965 |
| O | 47.855 | 31.206 | 10.618 |

|   |        |        |        |
|---|--------|--------|--------|
| H | 48.501 | 30.54  | 10.855 |
| H | 48.254 | 32.033 | 10.89  |
| O | 54.574 | 17.098 | 25.504 |
| H | 53.748 | 17.081 | 25.988 |
| H | 54.47  | 16.428 | 24.828 |
| O | 56.632 | 21.201 | 23.97  |
| H | 56.858 | 21.006 | 24.88  |
| H | 55.911 | 20.604 | 23.77  |
| O | 53.204 | 31.074 | 17.08  |
| H | 53.496 | 31.985 | 17.091 |
| H | 53.047 | 30.884 | 16.155 |
| O | 53.157 | 11.504 | 14.669 |
| H | 53.892 | 11.414 | 15.275 |
| H | 52.66  | 12.25  | 15.005 |
| O | 49.098 | 23.864 | 18.152 |
| H | 49.132 | 23.476 | 19.026 |
| H | 49.91  | 24.366 | 18.081 |
| O | 47.214 | 19.972 | 16.437 |
| H | 48.025 | 19.596 | 16.096 |
| H | 47.193 | 19.705 | 17.356 |
| O | 55.796 | 22.276 | 16.074 |
| H | 55.117 | 22.309 | 16.748 |
| H | 55.622 | 21.465 | 15.597 |
| O | 41.695 | 22.573 | 12.243 |
| H | 41.773 | 22.577 | 13.197 |
| H | 42.018 | 21.711 | 11.98  |
| O | 50.74  | 29.132 | 31.48  |
| H | 49.971 | 29.595 | 31.148 |
| H | 51.2   | 28.836 | 30.694 |
| O | 50.648 | 30.484 | 10.801 |
| H | 51.246 | 31.024 | 10.285 |
| H | 50.733 | 29.607 | 10.426 |
| O | 51.703 | 18.854 | 28.33  |
| H | 51.301 | 19.596 | 27.878 |
| H | 52.63  | 19.086 | 28.394 |
| O | 52.356 | 17.79  | 18.057 |
| H | 53.018 | 17.789 | 17.366 |
| H | 52.139 | 18.714 | 18.179 |
| O | 57.914 | 18.335 | 32.753 |
| H | 58.716 | 17.884 | 33.015 |
| H | 57.738 | 18.018 | 31.868 |
| O | 58.705 | 24.492 | 14.274 |
| H | 58.716 | 24.246 | 15.198 |
| H | 57.887 | 24.125 | 13.938 |
| O | 45.682 | 21.424 | 29.221 |
| H | 45.745 | 22.017 | 28.473 |
| H | 46.331 | 20.743 | 29.043 |

|   |        |        |        |
|---|--------|--------|--------|
| O | 51.159 | 20.715 | 19.659 |
| H | 50.264 | 20.834 | 19.978 |
| H | 51.691 | 20.658 | 20.452 |
| O | 50.125 | 16.61  | 28.527 |
| H | 50.835 | 17.202 | 28.778 |
| H | 49.845 | 16.21  | 29.35  |
| O | 55.016 | 21.12  | 11.675 |
| H | 54.77  | 20.332 | 11.19  |
| H | 55.941 | 21.25  | 11.467 |
| O | 61.475 | 18.096 | 25.712 |
| H | 62.432 | 18.109 | 25.718 |
| H | 61.222 | 18.967 | 26.018 |
| O | 61.009 | 14.86  | 16.347 |
| H | 61.762 | 15.314 | 16.724 |
| H | 60.642 | 14.359 | 17.075 |
| O | 49.253 | 20.505 | 25.166 |
| H | 48.953 | 21.035 | 24.428 |
| H | 48.523 | 19.914 | 25.35  |
| O | 62.478 | 11.133 | 25.811 |
| H | 61.587 | 10.916 | 25.536 |
| H | 62.513 | 12.089 | 25.777 |
| O | 44.867 | 16.441 | 9.325  |
| H | 44.847 | 16.191 | 10.249 |
| H | 44.268 | 15.828 | 8.899  |
| O | 50.049 | 23.245 | 24.691 |
| H | 49.834 | 22.79  | 25.505 |
| H | 50.981 | 23.45  | 24.77  |
| O | 55.421 | 12.145 | 30.796 |
| H | 55.689 | 11.522 | 31.471 |
| H | 56.217 | 12.635 | 30.593 |
| O | 45.212 | 13.093 | 11.688 |
| H | 44.715 | 13.845 | 12.01  |
| H | 46.119 | 13.286 | 11.926 |
| O | 56.375 | 34.105 | 25.478 |
| H | 55.864 | 33.298 | 25.537 |
| H | 56.347 | 34.339 | 24.55  |
| O | 57.815 | 18.993 | 10.258 |
| H | 58.344 | 19.488 | 9.632  |
| H | 57.771 | 18.111 | 9.89   |
| O | 52.086 | 30.385 | 19.446 |
| H | 51.975 | 31.305 | 19.683 |
| H | 52.678 | 30.4   | 18.694 |
| O | 53.338 | 22.861 | 12.659 |
| H | 53.996 | 22.333 | 12.206 |
| H | 52.584 | 22.86  | 12.07  |
| O | 52.422 | 24.553 | 25.553 |
| H | 53.071 | 25.161 | 25.91  |

|   |        |        |        |
|---|--------|--------|--------|
| H | 52.898 | 23.729 | 25.451 |
| O | 53.577 | 25.334 | 14.033 |
| H | 53.366 | 24.546 | 13.532 |
| H | 54.533 | 25.378 | 14.018 |
| O | 47.893 | 33.754 | 18.053 |
| H | 47.933 | 34.03  | 18.969 |
| H | 48.751 | 33.984 | 17.696 |
| O | 46.839 | 19.083 | 18.959 |
| H | 47.576 | 19.212 | 19.556 |
| H | 46.323 | 18.385 | 19.362 |
| O | 46.23  | 18.726 | 23.324 |
| H | 45.641 | 18.074 | 22.943 |
| H | 45.851 | 18.918 | 24.182 |
| O | 52.726 | 14.788 | 31.159 |
| H | 52.273 | 14.042 | 31.552 |
| H | 52.237 | 15.552 | 31.463 |
| O | 48.668 | 20.119 | 21.067 |
| H | 48.797 | 19.264 | 21.477 |
| H | 48.627 | 20.733 | 21.8   |
| O | 49.076 | 15.718 | 12.42  |
| H | 49.099 | 16.263 | 13.206 |
| H | 48.61  | 16.249 | 11.774 |
| O | 49.522 | 11.153 | 12.717 |
| H | 50.465 | 11.147 | 12.551 |
| H | 49.234 | 10.269 | 12.491 |
| O | 57.669 | 11.292 | 22.961 |
| H | 57.769 | 12.129 | 23.415 |
| H | 56.861 | 10.922 | 23.317 |
| O | 47.886 | 15.47  | 22.732 |
| H | 46.935 | 15.572 | 22.691 |
| H | 48.036 | 14.544 | 22.541 |
| O | 51.14  | 25.231 | 31.47  |
| H | 51.265 | 24.493 | 30.874 |
| H | 51.968 | 25.711 | 31.434 |
| O | 53.571 | 30.125 | 26.773 |
| H | 53.549 | 29.218 | 27.079 |
| H | 53.615 | 30.647 | 27.574 |
| O | 55.554 | 5.221  | 23.278 |
| H | 54.754 | 5.649  | 22.976 |
| H | 55.252 | 4.558  | 23.899 |
| O | 49.3   | 7.344  | 30.602 |
| H | 48.367 | 7.131  | 30.586 |
| H | 49.42  | 7.832  | 31.416 |
| O | 57.355 | 25.158 | 23.936 |
| H | 57.866 | 25.053 | 24.739 |
| H | 57.477 | 26.076 | 23.693 |
| O | 51.905 | 28.541 | 24.254 |

|   |        |        |        |
|---|--------|--------|--------|
| H | 52.417 | 27.86  | 24.689 |
| H | 52.248 | 28.565 | 23.36  |
| O | 57.662 | 24.103 | 26.55  |
| H | 57.748 | 23.306 | 26.026 |
| H | 58.123 | 23.905 | 27.365 |
| O | 54.043 | 21.974 | 29.384 |
| H | 54.676 | 22.168 | 30.075 |
| H | 54.291 | 21.105 | 29.068 |
| O | 59.387 | 12.86  | 14.05  |
| H | 58.457 | 12.976 | 13.855 |
| H | 59.591 | 13.563 | 14.667 |
| O | 54.517 | 27.638 | 11.915 |
| H | 55.376 | 28.056 | 11.859 |
| H | 54.281 | 27.699 | 12.84  |
| O | 51.695 | 14.496 | 11.672 |
| H | 50.867 | 14.703 | 12.107 |
| H | 51.475 | 13.793 | 11.061 |
| O | 49.845 | 12.47  | 15.327 |
| H | 49.854 | 11.786 | 14.657 |
| H | 49.102 | 13.026 | 15.091 |
| O | 45.734 | 27.037 | 21.982 |
| H | 46.478 | 26.836 | 21.414 |
| H | 44.993 | 27.129 | 21.383 |
| O | 52.673 | 13.504 | 6.046  |
| H | 52.154 | 13.142 | 5.328  |
| H | 52.08  | 13.496 | 6.797  |
| O | 57.209 | 13.734 | 8.356  |
| H | 56.3   | 13.851 | 8.631  |
| H | 57.707 | 14.327 | 8.919  |
| O | 54.089 | 31.065 | 31.721 |
| H | 53.65  | 30.36  | 31.245 |
| H | 54.463 | 31.62  | 31.037 |
| O | 60.024 | 10.536 | 24.235 |
| H | 60.448 | 10.279 | 23.416 |
| H | 59.134 | 10.777 | 23.978 |
| O | 58.789 | 27.257 | 16.74  |
| H | 58.417 | 26.528 | 17.237 |
| H | 58.473 | 28.04  | 17.19  |
| O | 54.898 | 33.037 | 13.151 |
| H | 55.508 | 33.069 | 12.415 |
| H | 55.45  | 32.856 | 13.912 |
| O | 52.185 | 21.453 | 5.73   |
| H | 52.535 | 22.221 | 6.18   |
| H | 51.756 | 20.946 | 6.419  |
| O | 47.434 | 23.995 | 3.146  |
| H | 47.806 | 24.249 | 3.991  |
| H | 47.482 | 23.039 | 3.141  |

|   |        |        |        |
|---|--------|--------|--------|
| O | 52.008 | 26.576 | 6.051  |
| H | 52.254 | 26.283 | 5.174  |
| H | 52.322 | 27.479 | 6.098  |
| O | 44.549 | 23.215 | 5.493  |
| H | 45.194 | 23.225 | 6.201  |
| H | 43.761 | 22.848 | 5.893  |
| O | 56.924 | 34.658 | 5.756  |
| H | 57.801 | 34.989 | 5.565  |
| H | 56.551 | 35.301 | 6.359  |
| O | 59.525 | 24.86  | 10.814 |
| H | 59.57  | 24.358 | 10     |
| H | 58.84  | 25.51  | 10.656 |
| O | 48.931 | 24.125 | 5.719  |
| H | 49.61  | 24.512 | 5.166  |
| H | 48.925 | 24.669 | 6.506  |
| O | 62.703 | 21.751 | 1.006  |
| H | 61.963 | 21.426 | 0.493  |
| H | 62.431 | 22.622 | 1.294  |
| O | 54.965 | 20.214 | 6.584  |
| H | 54.052 | 20.498 | 6.552  |
| H | 55.336 | 20.683 | 7.332  |
| O | 56.74  | 22.33  | 0.094  |
| H | 57.269 | 22.43  | 0.886  |
| H | 57.371 | 22.093 | -0.587 |
| O | 56.943 | 21.629 | -5.418 |
| H | 57.827 | 21.265 | -5.467 |
| H | 56.815 | 22.06  | -6.263 |
| O | 55.193 | 27.68  | 4.55   |
| H | 55.087 | 28.358 | 5.217  |
| H | 54.366 | 27.688 | 4.068  |
| O | 56.764 | 13.522 | 3.225  |
| H | 56.451 | 14.17  | 2.594  |
| H | 57.356 | 12.963 | 2.722  |
| O | 52.133 | 29.444 | 6.128  |
| H | 53.024 | 29.761 | 5.981  |
| H | 51.764 | 30.052 | 6.768  |
| O | 56.763 | 16.506 | -0.716 |
| H | 56.665 | 16.469 | -1.668 |
| H | 56.265 | 15.755 | -0.395 |
| O | 55.416 | 20.633 | 3.622  |
| H | 54.912 | 21.375 | 3.288  |
| H | 54.994 | 20.41  | 4.452  |
| O | 60.372 | 20.669 | 0.134  |
| H | 59.788 | 21.129 | 0.737  |
| H | 59.97  | 19.807 | 0.023  |
| O | 48.306 | 7.039  | 5.639  |
| H | 47.481 | 7.101  | 5.158  |

|   |        |        |        |
|---|--------|--------|--------|
| H | 48.954 | 6.805  | 4.974  |
| O | 43.169 | 29.416 | 8.968  |
| H | 43.245 | 29.688 | 8.053  |
| H | 42.256 | 29.588 | 9.194  |
| O | 54.289 | 15.789 | 6.153  |
| H | 55.063 | 15.379 | 5.766  |
| H | 53.635 | 15.091 | 6.177  |
| O | 51.061 | 25.891 | 15.236 |
| H | 50.881 | 26.779 | 15.544 |
| H | 51.984 | 25.908 | 14.983 |
| O | 53.746 | 31.716 | 3.278  |
| H | 53.555 | 30.893 | 3.728  |
| H | 54.053 | 32.302 | 3.97   |
| O | 46.3   | 27.476 | -3.112 |
| H | 45.468 | 27.337 | -2.659 |
| H | 46.715 | 28.195 | -2.635 |
| O | 53.066 | 15.972 | 1.274  |
| H | 53.124 | 16.801 | 1.748  |
| H | 52.145 | 15.903 | 1.024  |
| O | 52.797 | 23.758 | 6.675  |
| H | 52.594 | 24.687 | 6.571  |
| H | 52.895 | 23.638 | 7.619  |
| O | 57.258 | 11.123 | 1.414  |
| H | 57.637 | 11.929 | 1.064  |
| H | 58.011 | 10.551 | 1.566  |
| O | 57.324 | 26.325 | 9.912  |
| H | 57.191 | 27.138 | 10.4   |
| H | 57.094 | 26.547 | 9.01   |
| O | 58.108 | 17.283 | 5.127  |
| H | 58.405 | 16.905 | 4.299  |
| H | 57.627 | 16.574 | 5.555  |
| O | 61.387 | 18.172 | 5.516  |
| H | 60.606 | 18.702 | 5.356  |
| H | 61.048 | 17.299 | 5.714  |
| O | 48.159 | 18.944 | 1.053  |
| H | 47.374 | 19.416 | 1.332  |
| H | 48.047 | 18.061 | 1.406  |
| O | 54.979 | 25.005 | -0.409 |
| H | 55.711 | 24.39  | -0.362 |
| H | 54.253 | 24.545 | 0.013  |
| O | 48.763 | 15.732 | 5.566  |
| H | 48.746 | 16.644 | 5.276  |
| H | 48.024 | 15.659 | 6.17   |
| O | 50.676 | 19.31  | 2.47   |
| H | 50.3   | 19.01  | 3.298  |
| H | 49.973 | 19.191 | 1.831  |
| O | 42.805 | 26.692 | 5.681  |

|   |        |        |        |
|---|--------|--------|--------|
| H | 42.975 | 25.79  | 5.408  |
| H | 43.622 | 26.977 | 6.09   |
| O | 54.683 | 14.155 | 9.268  |
| H | 54.625 | 15.081 | 9.031  |
| H | 54.201 | 14.088 | 10.091 |
| O | 49.713 | 27.789 | 4.865  |
| H | 49.998 | 28.611 | 4.464  |
| H | 50.524 | 27.365 | 5.144  |
| O | 60.095 | 22.663 | 9.245  |
| H | 61.051 | 22.621 | 9.235  |
| H | 59.815 | 21.84  | 8.844  |
| O | 60.777 | 22.716 | 4.082  |
| H | 61.076 | 23.105 | 3.26   |
| H | 61.169 | 21.843 | 4.091  |
| O | 49.364 | 30.028 | 14.663 |
| H | 48.809 | 29.346 | 14.285 |
| H | 48.976 | 30.848 | 14.36  |
| O | 58.883 | 24.071 | 5.898  |
| H | 58.163 | 23.462 | 6.064  |
| H | 59.613 | 23.511 | 5.634  |
| O | 49.634 | 25.994 | 7.495  |
| H | 50.548 | 25.924 | 7.216  |
| H | 49.463 | 26.936 | 7.52   |
| O | 59.337 | 27.911 | -1.008 |
| H | 58.97  | 28.607 | -0.464 |
| H | 58.573 | 27.448 | -1.353 |
| O | 48.173 | 13.752 | 8.568  |
| H | 47.417 | 13.378 | 8.116  |
| H | 47.911 | 13.785 | 9.487  |
| O | 49.59  | 29.144 | 8.221  |
| H | 48.995 | 29.751 | 7.783  |
| H | 50.329 | 29.688 | 8.495  |
| O | 61.064 | 29.954 | 9.658  |
| H | 61.652 | 29.289 | 10.015 |
| H | 61.471 | 30.215 | 8.832  |
| O | 57.992 | 16.222 | 9.48   |
| H | 58.937 | 16.075 | 9.534  |
| H | 57.667 | 16.015 | 10.356 |
| O | 52.479 | 23.549 | 0.452  |
| H | 52.564 | 23.776 | -0.473 |
| H | 51.54  | 23.617 | 0.63   |
| O | 43.62  | 39.345 | 13.098 |
| H | 44.155 | 39.89  | 12.521 |
| H | 43.08  | 39.968 | 13.584 |
| O | 53.744 | 18.969 | 9.864  |
| H | 54.262 | 18.379 | 9.316  |
| H | 52.835 | 18.778 | 9.629  |



|   |        |        |        |
|---|--------|--------|--------|
| O | 57.197 | 21.502 | 5.501  |
| H | 56.566 | 21.449 | 4.784  |
| H | 56.684 | 21.311 | 6.287  |
| O | 49.744 | 18.664 | 5.48   |
| H | 49.777 | 19.464 | 6.006  |
| H | 50.379 | 18.08  | 5.894  |
| O | 48.874 | 17.893 | 8.688  |
| H | 48.165 | 17.607 | 8.113  |
| H | 48.456 | 18.497 | 9.302  |
| O | 51.585 | 9.933  | 4.794  |
| H | 51.802 | 9.486  | 5.612  |
| H | 51.159 | 10.745 | 5.07   |
| O | 58.487 | 18.477 | 0.391  |
| H | 58.078 | 19.054 | 1.035  |
| H | 57.78  | 17.897 | 0.106  |
| O | 50.01  | 20.876 | 9.519  |
| H | 49.12  | 20.543 | 9.401  |
| H | 50.568 | 20.22  | 9.101  |
| O | 65.189 | 18.281 | 11.713 |
| H | 64.414 | 17.784 | 11.451 |
| H | 64.971 | 19.19  | 11.509 |
| O | 54.974 | 29.764 | 6.078  |
| H | 55.207 | 29.691 | 7.004  |
| H | 55.547 | 30.452 | 5.74   |
| O | 56.208 | 22.447 | 8.127  |
| H | 55.439 | 22.51  | 8.693  |
| H | 56.397 | 23.352 | 7.879  |
| O | 66.441 | 30.879 | 4.949  |
| H | 66.047 | 30.873 | 5.821  |
| H | 66.127 | 31.691 | 4.55   |
| O | 53.459 | 22.564 | 2.7    |
| H | 53.069 | 22.792 | 1.856  |
| H | 52.936 | 23.043 | 3.343  |
| O | 49.24  | 31.621 | 3.879  |
| H | 49.196 | 32.415 | 4.412  |
| H | 48.393 | 31.583 | 3.435  |
| O | 45.883 | 20.443 | 1.274  |
| H | 45.974 | 20.809 | 2.154  |
| H | 45.619 | 21.186 | 0.732  |
| O | 46.819 | 20.114 | 5.892  |
| H | 47.359 | 20.286 | 6.663  |
| H | 47.015 | 19.206 | 5.66   |
| O | 52.425 | 18.049 | 6.086  |
| H | 52.963 | 17.262 | 5.998  |
| H | 52.827 | 18.681 | 5.49   |
| O | 50.519 | 15.241 | 0.763  |
| H | 49.898 | 15.425 | 1.469  |

|   |        |        |        |
|---|--------|--------|--------|
| H | 50.205 | 15.765 | 0.026  |
| O | 48.292 | 9.642  | 6.579  |
| H | 48.775 | 10.379 | 6.205  |
| H | 48.565 | 8.887  | 6.058  |
| O | 47.207 | 24.58  | 13.266 |
| H | 46.586 | 25.202 | 12.888 |
| H | 46.786 | 24.281 | 14.072 |
| O | 61.826 | 24.267 | 1.899  |
| H | 62.316 | 24.815 | 2.512  |
| H | 61.319 | 24.887 | 1.375  |
| O | 47.955 | 13.219 | 11.836 |
| H | 48.497 | 12.517 | 12.197 |
| H | 48.317 | 14.02  | 12.215 |
| O | 47.965 | 12.739 | 2.921  |
| H | 48.113 | 11.801 | 2.797  |
| H | 48.8   | 13.071 | 3.251  |
| O | 48.022 | 24.115 | 8.696  |
| H | 47.944 | 24.32  | 9.628  |
| H | 48.504 | 24.856 | 8.328  |
| O | 54.097 | 27.596 | 0.301  |
| H | 54.63  | 26.805 | 0.225  |
| H | 53.864 | 27.641 | 1.228  |
| O | 53.165 | 30.417 | 0.207  |
| H | 52.562 | 30.325 | -0.53  |
| H | 53.395 | 29.517 | 0.442  |
| O | 58.173 | 27.731 | 7.419  |
| H | 57.775 | 27.683 | 6.549  |
| H | 58.429 | 28.648 | 7.515  |
| O | 58.119 | 10.65  | -1.769 |
| H | 58.418 | 9.802  | -2.097 |
| H | 58.517 | 11.289 | -2.36  |
| O | 55.199 | 24.928 | 11.387 |
| H | 54.967 | 25.85  | 11.498 |
| H | 56.086 | 24.946 | 11.027 |
| O | 56.619 | 13.509 | 13.713 |
| H | 56.211 | 12.764 | 14.155 |
| H | 56.129 | 14.27  | 14.025 |
| O | 52.56  | 0.543  | 62.05  |
| H | 52.169 | 1.409  | 62.169 |
| H | 53.253 | 0.501  | 62.708 |
| O | 53.315 | 5.774  | 58.856 |
| H | 53.08  | 6.431  | 59.511 |
| H | 52.814 | 6.021  | 58.078 |
| O | 42.321 | 5.294  | 49.354 |
| H | 41.924 | 4.493  | 49.013 |
| H | 43.057 | 5.465  | 48.766 |
| O | 46.998 | -0.93  | 51.826 |

|   |        |        |        |
|---|--------|--------|--------|
| H | 47.169 | -1.355 | 52.666 |
| H | 46.165 | -0.476 | 51.952 |
| O | 55.634 | 20.165 | 57.901 |
| H | 55.855 | 20.81  | 58.573 |
| H | 56.469 | 19.756 | 57.677 |
| O | 52.145 | 10.622 | 50.638 |
| H | 52.026 | 11.567 | 50.731 |
| H | 51.703 | 10.403 | 49.818 |
| O | 54.323 | 5.249  | 48.851 |
| H | 54.742 | 4.411  | 49.049 |
| H | 53.801 | 5.077  | 48.068 |
| O | 48.866 | -0.477 | 49.422 |
| H | 48.294 | -0.764 | 50.134 |
| H | 49.74  | -0.453 | 49.81  |
| O | 59.201 | -4.609 | 49.351 |
| H | 59.581 | -4.429 | 48.491 |
| H | 59.435 | -3.847 | 49.881 |
| O | 55.933 | 4.806  | 60.411 |
| H | 55.457 | 4.038  | 60.096 |
| H | 55.999 | 5.377  | 59.645 |
| O | 47.829 | 7.983  | 48.019 |
| H | 47.693 | 7.442  | 47.241 |
| H | 47.353 | 8.793  | 47.833 |
| O | 51.902 | 3.024  | 52.496 |
| H | 52.177 | 3.91   | 52.263 |
| H | 51.702 | 2.607  | 51.659 |
| O | 37.483 | 5.182  | 46.395 |
| H | 37.593 | 4.575  | 45.663 |
| H | 36.953 | 4.699  | 47.029 |
| O | 46.707 | 4.558  | 60.073 |
| H | 46.712 | 3.603  | 60.006 |
| H | 47.629 | 4.807  | 60.012 |
| O | 42.839 | 7.86   | 53.462 |
| H | 42.5   | 7.237  | 52.82  |
| H | 43.756 | 7.982  | 53.217 |
| O | 50.421 | 8.021  | 50.37  |
| H | 50.991 | 7.927  | 51.134 |
| H | 50.479 | 7.177  | 49.922 |
| O | 57.659 | 6.92   | 46.802 |
| H | 57.151 | 7.155  | 47.578 |
| H | 57.672 | 5.963  | 46.805 |
| O | 61.113 | 7.101  | 46.922 |
| H | 60.173 | 7.143  | 47.1   |
| H | 61.355 | 6.198  | 47.13  |
| O | 55.654 | 7.833  | 48.722 |
| H | 55.276 | 6.973  | 48.904 |
| H | 55.627 | 8.289  | 49.563 |

|   |        |        |        |
|---|--------|--------|--------|
| O | 49.895 | 10.7   | 52.817 |
| H | 50.621 | 10.304 | 52.335 |
| H | 50.318 | 11.227 | 53.495 |
| O | 57.376 | 8.478  | 55.079 |
| H | 56.718 | 9.174  | 55.058 |
| H | 58.161 | 8.902  | 55.425 |
| O | 54.643 | 9.399  | 41.013 |
| H | 54.119 | 9.043  | 41.731 |
| H | 54.776 | 10.318 | 41.247 |
| O | 50.886 | 9.834  | 43.258 |
| H | 51.798 | 9.67   | 43.5   |
| H | 50.777 | 9.385  | 42.42  |
| O | 57.005 | 0.198  | 52.644 |
| H | 57.237 | -0.578 | 53.155 |
| H | 56.057 | 0.279  | 52.747 |
| O | 44.332 | 8.17   | 46.073 |
| H | 44.553 | 8.482  | 45.195 |
| H | 44.638 | 8.862  | 46.658 |
| O | 49.965 | 9.923  | 48.607 |
| H | 49.267 | 10.5   | 48.919 |
| H | 49.917 | 9.157  | 49.18  |
| O | 54.084 | -0.108 | 52.312 |
| H | 53.896 | -0.081 | 51.374 |
| H | 54.482 | -0.967 | 52.452 |
| O | 61.343 | 11.625 | 47.983 |
| H | 62.07  | 11.098 | 47.653 |
| H | 60.736 | 11.684 | 47.245 |
| O | 54.458 | 13.92  | 52.959 |
| H | 55.29  | 13.449 | 53.003 |
| H | 54.277 | 14.171 | 53.865 |
| O | 53.251 | -0.294 | 43.184 |
| H | 53.341 | -1.247 | 43.175 |
| H | 52.337 | -0.138 | 42.948 |
| O | 46.262 | -2.607 | 44.86  |
| H | 46.743 | -2.586 | 44.033 |
| H | 46.856 | -2.204 | 45.494 |
| O | 55.203 | 11.517 | 57.687 |
| H | 55.188 | 11.262 | 56.765 |
| H | 56.025 | 11.16  | 58.022 |
| O | 40.124 | 8.54   | 52.33  |
| H | 40.55  | 8.759  | 53.159 |
| H | 40.506 | 7.699  | 52.08  |
| O | 51.871 | 16.082 | 44.556 |
| H | 52.435 | 15.9   | 43.804 |
| H | 52.438 | 15.951 | 45.317 |
| O | 56.457 | 11.555 | 45.693 |
| H | 56.025 | 12.074 | 46.371 |

|   |        |        |        |
|---|--------|--------|--------|
| H | 56.031 | 10.699 | 45.739 |
| O | 62.944 | 1.419  | 48.254 |
| H | 63.457 | 0.619  | 48.375 |
| H | 62.438 | 1.503  | 49.062 |
| O | 50.624 | -0.466 | 41.225 |
| H | 49.758 | -0.678 | 40.875 |
| H | 51.204 | -1.123 | 40.842 |
| O | 58.424 | -1.9   | 46.733 |
| H | 57.853 | -1.77  | 45.976 |
| H | 59.31  | -1.821 | 46.38  |
| O | 58.758 | 9.614  | 48.324 |
| H | 58.795 | 9.76   | 47.379 |
| H | 59.672 | 9.631  | 48.605 |
| O | 44.924 | -0.459 | 39.839 |
| H | 44.761 | 0.087  | 40.608 |
| H | 45.106 | -1.328 | 40.195 |
| O | 46.282 | 7.058  | 58.332 |
| H | 45.722 | 7.608  | 58.88  |
| H | 46.74  | 6.49   | 58.952 |
| O | 61.317 | 13.784 | 54.297 |
| H | 61.57  | 14.172 | 53.459 |
| H | 60.833 | 14.478 | 54.745 |
| O | 53.42  | 0.937  | 46.293 |
| H | 54.166 | 0.337  | 46.319 |
| H | 52.766 | 0.482  | 45.762 |
| O | 48.918 | 16.934 | 55.218 |
| H | 48.445 | 16.178 | 55.566 |
| H | 48.307 | 17.337 | 54.601 |
| O | 52.788 | 11.569 | 54.894 |
| H | 52.514 | 12.145 | 55.608 |
| H | 52.567 | 10.688 | 55.199 |
| O | 52.212 | 9.325  | 56.587 |
| H | 52.248 | 8.38   | 56.732 |
| H | 51.919 | 9.685  | 57.424 |
| O | 51.257 | 1.246  | 50.433 |
| H | 51.085 | 1.62   | 49.569 |
| H | 51.779 | 0.463  | 50.256 |
| O | 49.686 | 4.374  | 50.136 |
| H | 49.276 | 3.524  | 50.292 |
| H | 49.039 | 5.011  | 50.441 |
| O | 54.06  | 13.161 | 44.742 |
| H | 54.086 | 12.596 | 45.515 |
| H | 54.206 | 14.042 | 45.085 |
| O | 56.62  | -1.03  | 41.124 |
| H | 57.574 | -1.07  | 41.052 |
| H | 56.303 | -1.547 | 40.383 |
| O | 50.499 | 4.28   | 45.448 |

|   |        |        |        |
|---|--------|--------|--------|
| H | 50.149 | 5.016  | 44.945 |
| H | 50.649 | 4.638  | 46.323 |
| O | 57.71  | 12.383 | 36.535 |
| H | 57.2   | 11.574 | 36.528 |
| H | 58.089 | 12.421 | 37.413 |
| O | 51.69  | 1.724  | 32.687 |
| H | 51.325 | 0.969  | 32.226 |
| H | 51.41  | 2.479  | 32.168 |
| O | 61.467 | 0.643  | 33.485 |
| H | 61.147 | -0.259 | 33.47  |
| H | 61.487 | 0.875  | 34.413 |
| O | 66.943 | 1.516  | 37.116 |
| H | 66.047 | 1.602  | 37.441 |
| H | 67.37  | 2.334  | 37.369 |
| O | 57.506 | 6.943  | 35.76  |
| H | 58.086 | 6.445  | 36.336 |
| H | 56.633 | 6.596  | 35.94  |
| O | 52.826 | 8.584  | 39.219 |
| H | 53.546 | 8.682  | 39.842 |
| H | 52.978 | 7.732  | 38.81  |
| O | 58.466 | 12.578 | 39.062 |
| H | 58.775 | 11.69  | 38.879 |
| H | 58.141 | 12.538 | 39.961 |
| O | 60.386 | 1.419  | 36.108 |
| H | 59.461 | 1.256  | 35.923 |
| H | 60.595 | 2.207  | 35.607 |
| O | 59.767 | 1.752  | 31.414 |
| H | 60.121 | 1.416  | 32.238 |
| H | 58.858 | 1.454  | 31.405 |
| O | 54.62  | 11.94  | 38.524 |
| H | 55.119 | 11.167 | 38.26  |
| H | 54.469 | 12.417 | 37.708 |
| O | 56.583 | 9.72   | 36.806 |
| H | 56.851 | 9.095  | 37.479 |
| H | 56.076 | 9.199  | 36.184 |
| O | 50.769 | 12.383 | 44.167 |
| H | 50.717 | 11.543 | 43.71  |
| H | 51.526 | 12.294 | 44.746 |
| O | 60.534 | 4.45   | 40.735 |
| H | 60.444 | 3.497  | 40.748 |
| H | 60.067 | 4.746  | 41.516 |
| O | 60.428 | 7.084  | 39.471 |
| H | 60.537 | 6.237  | 39.905 |
| H | 61.215 | 7.576  | 39.706 |
| O | 58.273 | 13.412 | 44.515 |
| H | 57.604 | 12.87  | 44.933 |
| H | 58.88  | 12.785 | 44.123 |

|   |        |        |        |
|---|--------|--------|--------|
| O | 58.134 | 0.629  | 34.596 |
| H | 57.655 | 1.147  | 35.243 |
| H | 57.953 | -0.28  | 34.835 |
| O | 50.076 | 5.585  | 35.273 |
| H | 50.011 | 5.793  | 36.205 |
| H | 50.47  | 4.713  | 35.25  |
| O | 52.885 | 5.878  | 33.781 |
| H | 51.934 | 5.788  | 33.848 |
| H | 53.019 | 6.449  | 33.025 |
| O | 51.57  | 16.249 | 33.024 |
| H | 52.222 | 16.598 | 33.632 |
| H | 50.766 | 16.192 | 33.541 |
| O | 47.891 | 11.783 | 38.351 |
| H | 47.869 | 11.824 | 37.395 |
| H | 47.02  | 12.071 | 38.624 |
| O | 59.019 | 0.749  | 51.073 |
| H | 58.276 | 0.815  | 51.673 |
| H | 58.709 | 1.151  | 50.262 |
| O | 63.374 | 4.646  | 40.698 |
| H | 63.445 | 4.35   | 41.605 |
| H | 62.455 | 4.504  | 40.47  |
| O | 56.203 | -2.902 | 24.289 |
| H | 55.792 | -3.121 | 25.125 |
| H | 56.26  | -1.946 | 24.294 |
| O | 55.294 | -2.733 | 45.728 |
| H | 55.873 | -3.495 | 45.722 |
| H | 55.791 | -2.051 | 45.276 |
| O | 49.961 | 0.428  | 43.552 |
| H | 50.233 | 0.087  | 42.7   |
| H | 50.5   | -0.047 | 44.184 |
| O | 52.508 | 1.703  | 40.761 |
| H | 52.066 | 2.111  | 41.505 |
| H | 51.995 | 0.915  | 40.58  |
| O | 54.408 | 0.201  | 34.319 |
| H | 54.745 | -0.556 | 33.839 |
| H | 53.48  | 0.008  | 34.45  |
| O | 57.375 | 3.716  | 40.91  |
| H | 58.216 | 3.292  | 40.745 |
| H | 56.993 | 3.217  | 41.632 |
| O | 59.935 | 16.135 | 40.538 |
| H | 59.833 | 15.7   | 39.692 |
| H | 59.054 | 16.436 | 40.761 |
| O | 54.917 | 5.779  | 36.068 |
| H | 54.218 | 5.878  | 36.715 |
| H | 54.474 | 5.859  | 35.223 |
| O | 42.178 | 8.077  | 42.966 |
| H | 42.99  | 8.576  | 43.063 |

|   |        |        |        |
|---|--------|--------|--------|
| H | 41.682 | 8.554  | 42.301 |
| O | 54.323 | 4.822  | 42.576 |
| H | 53.923 | 4.568  | 43.408 |
| H | 55.166 | 5.203  | 42.821 |
| O | 53.6   | 6.014  | 45.442 |
| H | 53.505 | 5.083  | 45.24  |
| H | 54.488 | 6.232  | 45.158 |
| O | 51.738 | 9.623  | 32.637 |
| H | 51.005 | 10.01  | 32.158 |
| H | 51.372 | 8.835  | 33.039 |
| O | 53.094 | 3.614  | 27.176 |
| H | 52.184 | 3.328  | 27.254 |
| H | 53.5   | 3.35   | 28.001 |
| O | 64.164 | -0.137 | 34.91  |
| H | 64.674 | 0.493  | 34.401 |
| H | 63.906 | 0.343  | 35.696 |
| O | 57.222 | 7.851  | 42.147 |
| H | 57.412 | 8.76   | 42.381 |
| H | 56.851 | 7.903  | 41.266 |
| O | 47.209 | 9.181  | 33.386 |
| H | 46.65  | 8.621  | 33.924 |
| H | 46.662 | 9.415  | 32.636 |
| O | 52.191 | 7.135  | 52.679 |
| H | 52.567 | 6.29   | 52.433 |
| H | 52.629 | 7.362  | 53.5   |
| O | 54.309 | 15.257 | 46.11  |
| H | 54.699 | 15.9   | 45.519 |
| H | 54.699 | 15.449 | 46.963 |
| O | 56.846 | 5.644  | 33.154 |
| H | 57.602 | 5.091  | 32.963 |
| H | 57.151 | 6.238  | 33.84  |
| O | 51.498 | -3.662 | 31.383 |
| H | 51.126 | -4.544 | 31.407 |
| H | 51.407 | -3.389 | 30.47  |
| O | 54.083 | 9.568  | 34.016 |
| H | 53.324 | 9.839  | 33.5   |
| H | 53.718 | 9.316  | 34.864 |
| O | 60.486 | 12.688 | 35.403 |
| H | 59.657 | 12.259 | 35.613 |
| H | 60.274 | 13.277 | 34.678 |
| O | 54.716 | 4.106  | 33.087 |
| H | 53.951 | 4.673  | 33.181 |
| H | 55.464 | 4.699  | 33.153 |
| O | 48.906 | -4.12  | 29.281 |
| H | 48.276 | -3.958 | 28.579 |
| H | 49.236 | -5.001 | 29.108 |
| O | 53.884 | 12.341 | 36.033 |



|   |        |        |        |
|---|--------|--------|--------|
| H | 53.88  | 11.499 | 35.578 |
| H | 54.205 | 12.964 | 35.381 |
| O | 49.71  | 5.175  | 28.854 |
| H | 49.484 | 5.909  | 29.425 |
| H | 50.132 | 4.541  | 29.434 |
| O | 49.818 | 17.836 | 44.938 |
| H | 50.242 | 18.658 | 45.184 |
| H | 50.5   | 17.173 | 45.048 |
| O | 56.358 | 11.19  | 33.513 |
| H | 55.519 | 10.744 | 33.636 |
| H | 57.013 | 10.502 | 33.628 |
| O | 52.916 | 3.327  | 44.359 |
| H | 52.139 | 3.549  | 44.873 |
| H | 52.714 | 2.474  | 43.976 |
| O | 53.309 | -3.015 | 37.67  |
| H | 53.479 | -3.821 | 37.183 |
| H | 52.698 | -2.526 | 37.119 |
| O | 56.339 | 5.625  | 39.297 |
| H | 56.991 | 5.034  | 39.675 |
| H | 55.519 | 5.131  | 39.334 |
| O | 55.049 | 3.203  | 29.299 |
| H | 55.76  | 3.763  | 29.611 |
| H | 54.999 | 2.498  | 29.944 |
| O | 50.113 | 2.337  | 48.086 |
| H | 49.648 | 3.159  | 47.93  |
| H | 49.81  | 1.755  | 47.389 |
| O | 56.222 | -1.56  | 27.86  |
| H | 56.829 | -2.195 | 28.24  |
| H | 55.413 | -2.054 | 27.724 |
| O | 53.925 | -0.571 | 30.535 |
| H | 53.883 | -0.662 | 31.487 |
| H | 53.787 | 0.363  | 30.378 |
| O | 54.028 | 3.993  | 40.049 |
| H | 53.689 | 3.1    | 39.995 |
| H | 54.053 | 4.184  | 40.987 |
| O | 55.28  | 9.185  | 45.884 |
| H | 55.254 | 9.228  | 46.84  |
| H | 55.695 | 8.344  | 45.694 |
| O | 49.476 | 9.424  | 45.608 |
| H | 49.977 | 9.526  | 44.799 |
| H | 50.139 | 9.396  | 46.298 |
| O | 59.298 | 4.404  | 45.949 |
| H | 59.509 | 4.967  | 45.205 |
| H | 59.45  | 3.515  | 45.627 |
| O | 52.98  | 9.086  | 36.541 |
| H | 52.038 | 9.133  | 36.378 |
| H | 53.063 | 9.178  | 37.49  |

|   |        |        |        |
|---|--------|--------|--------|
| O | 54.445 | 1.7    | 31.805 |
| H | 53.732 | 1.433  | 32.385 |
| H | 54.71  | 2.56   | 32.132 |
| O | 57.744 | 14.129 | 34.503 |
| H | 57.667 | 13.571 | 35.277 |
| H | 56.875 | 14.103 | 34.102 |
| O | 62.164 | 6.741  | 32.194 |
| H | 61.493 | 6.916  | 32.854 |
| H | 62.812 | 7.434  | 32.321 |
| O | 50.463 | 9.803  | 36.923 |
| H | 49.62  | 10.21  | 36.722 |
| H | 50.861 | 10.384 | 37.571 |
| O | 50.466 | 3.477  | 30.833 |
| H | 49.725 | 3.704  | 31.395 |
| H | 50.142 | 2.762  | 30.285 |
| O | 52.375 | 3.145  | 35.113 |
| H | 52.95  | 2.685  | 35.723 |
| H | 52.534 | 2.722  | 34.269 |
| O | 42.862 | 14.085 | 39.626 |
| H | 42.784 | 14.369 | 40.537 |
| H | 41.996 | 14.243 | 39.251 |
| O | 52.827 | 6.033  | 38.425 |
| H | 52.009 | 5.563  | 38.264 |
| H | 53.343 | 5.437  | 38.968 |
| O | 49.535 | 7.754  | 33.593 |
| H | 49.59  | 7.125  | 34.312 |
| H | 48.865 | 8.378  | 33.871 |
| O | 50.678 | 6.647  | 43.625 |
| H | 50.685 | 7.569  | 43.879 |
| H | 51.422 | 6.556  | 43.029 |
| O | 64.769 | 18.065 | 36.645 |
| H | 65.663 | 18.114 | 36.307 |
| H | 64.731 | 17.225 | 37.101 |
| O | 60.489 | 6.451  | 36.746 |
| H | 60.473 | 5.506  | 36.594 |
| H | 60.292 | 6.547  | 37.678 |
| O | 48.01  | 11.064 | 35.658 |
| H | 47.072 | 10.997 | 35.481 |
| H | 48.428 | 10.726 | 34.866 |
| O | 48.177 | 4.542  | 32.377 |
| H | 47.27  | 4.45   | 32.669 |
| H | 48.611 | 5.01   | 33.091 |
| O | 58.776 | 20.246 | 47.085 |
| H | 58.444 | 19.434 | 47.469 |
| H | 58.048 | 20.576 | 46.558 |
| O | 55.056 | 13.617 | 33.791 |
| H | 55.56  | 12.807 | 33.721 |

|   |        |        |        |
|---|--------|--------|--------|
| H | 54.802 | 13.82  | 32.891 |
| O | 51.084 | 10.583 | 28.111 |
| H | 50.673 | 10.795 | 28.95  |
| H | 51.932 | 11.027 | 28.142 |
| O | 56.615 | 9.153  | 21.001 |
| H | 56.588 | 8.534  | 20.271 |
| H | 56.526 | 10.012 | 20.589 |
| O | 51.134 | -8.637 | 24.645 |
| H | 50.933 | -9.562 | 24.787 |
| H | 51.836 | -8.643 | 23.993 |
| O | 52.151 | 9.344  | 25.09  |
| H | 53.026 | 9.05   | 24.839 |
| H | 52.24  | 9.605  | 26.007 |
| O | 57.706 | -0.8   | 19.493 |
| H | 58.167 | -0.225 | 20.104 |
| H | 56.792 | -0.523 | 19.546 |
| O | 62.592 | 14.327 | 25.996 |
| H | 63.311 | 14.405 | 25.37  |
| H | 62.984 | 14.549 | 26.841 |
| O | 59.77  | 13.002 | 18.046 |
| H | 58.892 | 13.234 | 17.745 |
| H | 59.675 | 12.878 | 18.991 |
| O | 53.347 | 1.587  | 20.803 |
| H | 54.016 | 2.172  | 21.159 |
| H | 52.629 | 1.632  | 21.434 |
| O | 59.627 | 9.045  | 18.095 |
| H | 59.037 | 8.908  | 17.354 |
| H | 59.725 | 9.995  | 18.151 |
| O | 56.409 | 7.534  | 18.896 |
| H | 55.488 | 7.275  | 18.873 |
| H | 56.558 | 7.966  | 18.054 |
| O | 49.734 | 4.804  | 23.213 |
| H | 49.8   | 5.322  | 24.015 |
| H | 48.803 | 4.598  | 23.136 |
| O | 63.007 | -1.266 | 27.565 |
| H | 63.705 | -1.093 | 28.198 |
| H | 62.198 | -1.15  | 28.064 |
| O | 60.116 | -2.127 | 19.425 |
| H | 60.378 | -2.102 | 20.345 |
| H | 59.477 | -1.42  | 19.338 |
| O | 54.54  | 3.275  | 24.846 |
| H | 54.166 | 3.803  | 25.551 |
| H | 54.879 | 2.495  | 25.286 |
| O | 57.726 | 4.749  | 29.752 |
| H | 57.049 | 5.425  | 29.8   |
| H | 57.892 | 4.642  | 28.816 |
| O | 45.919 | -0.676 | 34.653 |

|   |        |        |        |
|---|--------|--------|--------|
| H | 45.027 | -1.022 | 34.689 |
| H | 46.224 | -0.707 | 35.559 |
| O | 58.337 | 5.529  | 19.81  |
| H | 57.766 | 6.24   | 19.52  |
| H | 58.314 | 4.895  | 19.093 |
| O | 53.974 | 6.771  | 27.79  |
| H | 53.436 | 7.139  | 28.491 |
| H | 54.164 | 5.878  | 28.078 |
| O | 55.438 | 4.511  | 9.868  |
| H | 55.332 | 5.462  | 9.824  |
| H | 54.611 | 4.195  | 10.232 |
| O | 52.794 | 6.633  | 22.87  |
| H | 52.441 | 5.848  | 22.451 |
| H | 52.023 | 7.104  | 23.186 |
| O | 46.892 | 8.131  | 14.177 |
| H | 47.076 | 8.712  | 13.439 |
| H | 45.937 | 8.112  | 14.234 |
| O | 54.173 | 7.479  | 9.845  |
| H | 54.906 | 8.094  | 9.884  |
| H | 53.694 | 7.728  | 9.055  |
| O | 51.504 | -4.165 | 26.506 |
| H | 51.001 | -4.935 | 26.24  |
| H | 51.789 | -3.769 | 25.683 |
| O | 54.125 | 8.953  | 22.403 |
| H | 55.047 | 8.845  | 22.169 |
| H | 53.782 | 8.06   | 22.444 |
| O | 48.614 | 4.17   | 26.412 |
| H | 49.191 | 3.423  | 26.252 |
| H | 48.976 | 4.589  | 27.193 |
| O | 59.733 | 5.424  | 6.534  |
| H | 60.524 | 5.789  | 6.931  |
| H | 60.057 | 4.797  | 5.888  |
| O | 58.572 | 6.414  | 22.409 |
| H | 58.344 | 6.086  | 21.539 |
| H | 59.389 | 5.966  | 22.628 |
| O | 57.355 | 0.481  | 12.905 |
| H | 57.252 | 1.348  | 13.297 |
| H | 58.3   | 0.329  | 12.907 |
| O | 46.875 | 7.575  | 28.631 |
| H | 46.562 | 7.632  | 27.729 |
| H | 47.776 | 7.896  | 28.593 |
| O | 43.847 | 3.806  | 12.398 |
| H | 43.569 | 2.903  | 12.552 |
| H | 43.03  | 4.292  | 12.283 |
| O | 63.848 | 0.588  | 32.085 |
| H | 63.457 | 1.215  | 31.475 |
| H | 63.167 | 0.435  | 32.74  |

|   |        |        |        |
|---|--------|--------|--------|
| O | 53.088 | 7.201  | 13.073 |
| H | 53.667 | 7.962  | 13.119 |
| H | 52.355 | 7.423  | 13.648 |
| O | 53.172 | -0.765 | 13.16  |
| H | 52.326 | -0.514 | 13.531 |
| H | 53.262 | -0.22  | 12.379 |
| O | 49.528 | -0.928 | 21.024 |
| H | 49.513 | -1.877 | 21.148 |
| H | 48.645 | -0.712 | 20.724 |
| O | 58.794 | -1.452 | 38.368 |
| H | 58.298 | -1.38  | 37.553 |
| H | 59.058 | -2.371 | 38.408 |
| O | 60.944 | 14.05  | 21.952 |
| H | 61.802 | 14.105 | 22.373 |
| H | 60.469 | 14.816 | 22.275 |
| O | 52.941 | 6.789  | 17.461 |
| H | 53.203 | 6.962  | 18.365 |
| H | 52.093 | 6.351  | 17.537 |
| O | 46.963 | 2.485  | 23.275 |
| H | 47.698 | 2.302  | 22.69  |
| H | 46.355 | 1.761  | 23.129 |
| O | 54.772 | 0.194  | 8.009  |
| H | 55.407 | 0.725  | 7.527  |
| H | 55.265 | -0.58  | 8.281  |
| O | 56.69  | 7.462  | 24.316 |
| H | 56.154 | 6.699  | 24.103 |
| H | 57.49  | 7.343  | 23.804 |
| O | 47.378 | 9.753  | 16.31  |
| H | 48.049 | 9.245  | 16.766 |
| H | 47.113 | 9.196  | 15.578 |
| O | 51.754 | 14.04  | 27.398 |
| H | 52.352 | 13.502 | 27.917 |
| H | 52.042 | 13.913 | 26.493 |
| O | 49.781 | 10.723 | 30.899 |
| H | 48.947 | 10.851 | 30.447 |
| H | 50.072 | 11.607 | 31.12  |
| O | 53.985 | 3.225  | 13.311 |
| H | 53.658 | 3.44   | 12.438 |
| H | 53.233 | 2.841  | 13.762 |
| O | 55.792 | 2.62   | 18.159 |
| H | 56.434 | 2.14   | 17.636 |
| H | 54.949 | 2.242  | 17.91  |
| O | 54.194 | 9.782  | 12.893 |
| H | 53.936 | 10.438 | 13.541 |
| H | 53.476 | 9.777  | 12.259 |
| O | 50.911 | 17.444 | 14.06  |
| H | 50.899 | 17.299 | 13.114 |

|   |        |        |        |
|---|--------|--------|--------|
| H | 51.786 | 17.169 | 14.333 |
| O | 52.69  | 5.408  | 11.347 |
| H | 52.942 | 5.959  | 12.089 |
| H | 52.968 | 5.902  | 10.576 |
| O | 52.341 | -0.319 | 9.749  |
| H | 51.552 | -0.5   | 9.237  |
| H | 53.047 | -0.305 | 9.103  |
| O | 52.322 | 10.373 | 18.988 |
| H | 52.75  | 11.23  | 18.975 |
| H | 51.843 | 10.332 | 18.16  |
| O | 48.892 | 8.947  | 27.116 |
| H | 48.636 | 9.427  | 26.328 |
| H | 49.589 | 9.477  | 27.504 |
| O | 54.813 | 11.503 | 26.857 |
| H | 55.15  | 10.776 | 27.38  |
| H | 54.818 | 11.175 | 25.958 |
| O | 51.672 | 5.522  | 7.329  |
| H | 52.615 | 5.398  | 7.443  |
| H | 51.401 | 4.795  | 6.768  |
| O | 57.638 | 0.283  | 29.193 |
| H | 57.236 | -0.362 | 28.611 |
| H | 57.105 | 0.254  | 29.988 |
| O | 50.471 | 12.778 | 9.896  |
| H | 50.301 | 11.837 | 9.871  |
| H | 49.686 | 13.174 | 9.517  |
| O | 58.175 | 12.889 | 27.18  |
| H | 57.314 | 12.94  | 26.765 |
| H | 58.471 | 13.798 | 27.232 |
| O | 60.017 | 3.243  | 15.823 |
| H | 60.023 | 2.295  | 15.956 |
| H | 59.43  | 3.577  | 16.502 |
| O | 48.44  | 11.058 | 24.706 |
| H | 48.725 | 11.972 | 24.706 |
| H | 47.484 | 11.105 | 24.73  |
| O | 64.033 | -1.317 | 18.375 |
| H | 64.402 | -0.597 | 17.863 |
| H | 63.245 | -1.572 | 17.895 |
| O | 56.64  | 2.98   | 14.125 |
| H | 55.763 | 3.174  | 13.795 |
| H | 56.973 | 3.823  | 14.432 |
| O | 57.374 | 8.434  | 29.64  |
| H | 56.9   | 7.842  | 30.223 |
| H | 56.891 | 8.396  | 28.815 |
| O | 59.987 | 1.378  | 20.864 |
| H | 60.369 | 2.172  | 21.238 |
| H | 59.321 | 1.112  | 21.498 |
| O | 50.685 | 14.799 | 21.56  |

|   |        |        |        |
|---|--------|--------|--------|
| H | 51.006 | 15.059 | 22.424 |
| H | 49.952 | 14.212 | 21.744 |
| O | 58.219 | 4.77   | 27.085 |
| H | 59.001 | 5.313  | 27.177 |
| H | 58.181 | 4.561  | 26.151 |
| O | 56.529 | 18.163 | 12.65  |
| H | 56.645 | 17.218 | 12.549 |
| H | 57.087 | 18.546 | 11.973 |
| O | 50.543 | 3.557  | 13.752 |
| H | 49.983 | 4.22   | 14.156 |
| H | 50.482 | 3.733  | 12.813 |
| O | 52.13  | -1.096 | 19.139 |
| H | 51.226 | -1.087 | 19.451 |
| H | 52.177 | -0.368 | 18.519 |
| O | 49.612 | 6.895  | 25.24  |
| H | 50.079 | 6.403  | 25.915 |
| H | 49.37  | 7.717  | 25.666 |
| O | 49.305 | 8.14   | 17.538 |
| H | 49.227 | 8.375  | 18.462 |
| H | 49.258 | 7.184  | 17.529 |
| O | 45.729 | 3.613  | 26.94  |
| H | 46.672 | 3.639  | 26.776 |
| H | 45.597 | 4.208  | 27.677 |
| O | 48.342 | 0.084  | 26.124 |
| H | 48.111 | -0.22  | 25.246 |
| H | 47.509 | 0.113  | 26.595 |
| O | 49.273 | 13.961 | 28.481 |
| H | 49.723 | 14.804 | 28.428 |
| H | 49.834 | 13.359 | 27.992 |
| O | 57.268 | 16.568 | 18.893 |
| H | 56.576 | 17.116 | 18.524 |
| H | 58.007 | 17.164 | 19.013 |
| O | 55.533 | 10.434 | 24.466 |
| H | 55.13  | 10.832 | 23.695 |
| H | 55.647 | 9.514  | 24.229 |
| O | 53.532 | 8.179  | 19.611 |
| H | 53.544 | 8.41   | 20.54  |
| H | 53.244 | 8.978  | 19.169 |
| O | 48.001 | 6.018  | 20.405 |
| H | 48.166 | 6.507  | 21.211 |
| H | 48.321 | 5.136  | 20.59  |
| O | 62.897 | 5.112  | 13.319 |
| H | 61.961 | 5.261  | 13.187 |
| H | 63.321 | 5.855  | 12.89  |
| O | 42.099 | 7.337  | 23.231 |
| H | 42.95  | 6.968  | 23.467 |
| H | 41.642 | 6.622  | 22.788 |

|   |        |        |        |
|---|--------|--------|--------|
| O | 48.778 | 7.442  | 22.651 |
| H | 49.005 | 6.939  | 23.434 |
| H | 49.399 | 8.171  | 22.647 |
| O | 51.18  | 7.913  | 15.597 |
| H | 50.384 | 8.045  | 16.112 |
| H | 51.872 | 7.804  | 16.25  |
| O | 55.906 | 10.92  | 19.135 |
| H | 55.104 | 11.355 | 18.845 |
| H | 56.569 | 11.611 | 19.128 |
| O | 49.741 | 8.321  | 12.86  |
| H | 49.427 | 7.555  | 12.38  |
| H | 49.611 | 8.096  | 13.782 |
| O | 50.712 | -1.293 | 4.243  |
| H | 51.117 | -2.072 | 4.624  |
| H | 51.412 | -0.642 | 4.228  |
| O | 52.913 | 3.837  | -3.236 |
| H | 52.625 | 2.959  | -2.985 |
| H | 53.344 | 3.714  | -4.082 |
| O | 49.48  | 7.766  | -1.16  |
| H | 50.351 | 7.608  | -1.525 |
| H | 48.901 | 7.79   | -1.922 |
| O | 39.991 | 3.109  | 2.111  |
| H | 39.732 | 2.271  | 1.726  |
| H | 40.024 | 3.713  | 1.37   |
| O | 56.604 | 8.365  | 0.655  |
| H | 56.62  | 9.322  | 0.676  |
| H | 56.409 | 8.15   | -0.257 |
| O | 54.11  | 15.705 | 11.736 |
| H | 54.066 | 16.441 | 11.126 |
| H | 53.236 | 15.316 | 11.706 |
| O | 54.459 | 5.337  | 7.035  |
| H | 54.297 | 5.691  | 6.16   |
| H | 55.348 | 5.622  | 7.247  |
| O | 50.341 | 8.879  | 2.503  |
| H | 50.596 | 9.083  | 3.403  |
| H | 49.674 | 9.531  | 2.289  |
| O | 53.466 | 3.879  | 3.987  |
| H | 53.798 | 4.768  | 4.117  |
| H | 52.629 | 4      | 3.539  |
| O | 50.899 | 3.721  | 0.422  |
| H | 50.668 | 4.565  | 0.036  |
| H | 51.801 | 3.567  | 0.139  |
| O | 51.842 | -2.807 | 7.834  |
| H | 51.325 | -2.003 | 7.873  |
| H | 52.165 | -2.842 | 6.934  |
| O | 53.371 | -0.154 | 5.514  |
| H | 53.496 | -1.075 | 5.743  |



|   |        |        |        |
|---|--------|--------|--------|
| H | 53.507 | 0.318  | 6.336  |
| O | 51.306 | 8.495  | 8.883  |
| H | 50.999 | 7.599  | 9.016  |
| H | 51.814 | 8.457  | 8.073  |
| O | 50.103 | 1.792  | 4.899  |
| H | 50.014 | 1.121  | 4.222  |
| H | 49.289 | 1.737  | 5.399  |
| O | 45.833 | -2.435 | 6.449  |
| H | 46.688 | -2.529 | 6.027  |
| H | 45.382 | -1.771 | 5.928  |
| O | 57.866 | 3.213  | 5.742  |
| H | 56.943 | 3.083  | 5.96   |
| H | 57.865 | 3.417  | 4.807  |
| O | 52.37  | 2.702  | 6.876  |
| H | 51.625 | 2.498  | 6.312  |
| H | 53.117 | 2.281  | 6.449  |
| O | 51.022 | 5.022  | 18.222 |
| H | 51.397 | 4.142  | 18.17  |
| H | 50.302 | 5.013  | 17.591 |
| O | 52.974 | 2.751  | 9.503  |
| H | 52.903 | 2.867  | 8.555  |
| H | 52.955 | 1.803  | 9.63   |
| O | 51.155 | 0.787  | 11.819 |
| H | 51.432 | 0.345  | 11.017 |
| H | 51.774 | 1.511  | 11.919 |
| O | 61.993 | 8.282  | 16.382 |
| H | 62.597 | 9.017  | 16.484 |
| H | 61.276 | 8.476  | 16.987 |
| O | 53.872 | 8.655  | 3.603  |
| H | 53.102 | 9.086  | 3.974  |
| H | 54.504 | 9.363  | 3.476  |
| O | 52.578 | -3.399 | 5.199  |
| H | 51.827 | -3.853 | 4.819  |
| H | 53.283 | -4.047 | 5.183  |
| O | 50     | -0.583 | 8.071  |
| H | 49.378 | -0.676 | 8.794  |
| H | 49.466 | -0.291 | 7.333  |
| O | 55.526 | 9.649  | 7.864  |
| H | 55.159 | 10.38  | 7.367  |
| H | 55.608 | 9.983  | 8.757  |
| O | 59.245 | 13.217 | 1.561  |
| H | 59.938 | 13.487 | 2.163  |
| H | 59.634 | 12.506 | 1.051  |
| O | 42.659 | 11.722 | 6.173  |
| H | 42.087 | 10.955 | 6.166  |
| H | 43.525 | 11.376 | 5.957  |
| O | 63.04  | 2.738  | 18.089 |

|   |        |        |        |
|---|--------|--------|--------|
| H | 62.625 | 1.884  | 17.966 |
| H | 63.279 | 3.017  | 17.205 |
| O | 55.63  | 6.852  | -1.846 |
| H | 55     | 6.292  | -1.392 |
| H | 55.195 | 7.088  | -2.665 |
| O | 51.687 | 13.753 | 17.204 |
| H | 50.991 | 13.531 | 16.586 |
| H | 51.354 | 14.516 | 17.676 |
| O | 55.23  | 5.488  | 15.076 |
| H | 54.699 | 5.017  | 14.433 |
| H | 54.623 | 6.109  | 15.479 |
| O | 51.813 | 9.51   | 11.663 |
| H | 51.072 | 9.038  | 12.043 |
| H | 51.795 | 9.277  | 10.735 |
| O | 56.844 | 6.55   | 11.607 |
| H | 56.493 | 7.065  | 12.333 |
| H | 56.772 | 7.128  | 10.847 |
| O | 58.091 | 4.131  | 11.571 |
| H | 57.71  | 3.756  | 10.778 |
| H | 57.593 | 4.935  | 11.72  |
| O | 55.067 | 2.761  | 5.798  |
| H | 54.583 | 2.993  | 5.005  |
| H | 54.979 | 3.527  | 6.365  |
| O | 49.248 | 6.302  | 8.245  |
| H | 48.905 | 6.826  | 7.521  |
| H | 49.927 | 5.757  | 7.847  |
| O | 54.621 | 11.998 | 7.135  |
| H | 54.038 | 12.58  | 6.648  |
| H | 54.593 | 12.329 | 8.033  |
| O | 48.271 | 10.411 | 1.543  |
| H | 48.607 | 10.919 | 0.804  |
| H | 47.33  | 10.348 | 1.383  |
| O | 49.435 | 12.596 | 0.143  |
| H | 48.533 | 12.91  | 0.196  |
| H | 49.968 | 13.391 | 0.176  |
| O | 50.768 | 10.394 | -0.519 |
| H | 50.067 | 9.743  | -0.493 |
| H | 50.328 | 11.227 | -0.347 |
| O | 54.858 | 2.385  | -8.919 |
| H | 54.648 | 1.952  | -8.092 |
| H | 54.055 | 2.317  | -9.436 |
| O | 60.652 | 12.041 | 9.692  |
| H | 61.549 | 12.057 | 9.36   |
| H | 60.683 | 12.569 | 10.49  |
| O | 49.427 | 10.177 | 9.616  |
| H | 50     | 9.509  | 9.239  |
| H | 48.651 | 10.172 | 9.055  |

|   |        |        |        |
|---|--------|--------|--------|
| O | 53.237 | 24.844 | 9.546  |
| H | 52.702 | 24.25  | 10.073 |
| H | 54.008 | 25.015 | 10.087 |
| O | 43.724 | 12.234 | -0.002 |
| H | 43.866 | 11.819 | -0.853 |
| H | 42.839 | 11.97  | 0.248  |
| O | 52.67  | 7.636  | 1.389  |
| H | 53.162 | 7.585  | 2.208  |
| H | 51.859 | 8.087  | 1.624  |
| O | 54.469 | 6.335  | 4.656  |
| H | 54.073 | 7.154  | 4.359  |
| H | 55.405 | 6.529  | 4.713  |
| O | 59.469 | 13.502 | 4.586  |
| H | 58.582 | 13.234 | 4.345  |
| H | 59.562 | 13.228 | 5.499  |
| O | 40.062 | 55.257 | 56.876 |
| H | 39.272 | 55.794 | 56.809 |
| H | 40.14  | 55.062 | 57.81  |
| O | 42.307 | 60.491 | 60.502 |
| H | 41.373 | 60.479 | 60.297 |
| H | 42.711 | 60.93  | 59.754 |
| O | 25.937 | 62.582 | 53.726 |
| H | 26.107 | 61.64  | 53.727 |
| H | 25.543 | 62.755 | 54.581 |
| O | 26.641 | 50.28  | 55.157 |
| H | 26.816 | 49.348 | 55.027 |
| H | 27.05  | 50.707 | 54.404 |
| O | 31.134 | 64.33  | 52.668 |
| H | 32.005 | 64.247 | 52.278 |
| H | 30.541 | 64.383 | 51.919 |
| O | 42.554 | 49.656 | 57.416 |
| H | 41.928 | 49.2   | 57.979 |
| H | 42.03  | 49.967 | 56.678 |
| O | 43.991 | 58.165 | 48.049 |
| H | 44.441 | 57.87  | 48.84  |
| H | 43.279 | 57.536 | 47.93  |
| O | 37.285 | 50.329 | 55.436 |
| H | 37.14  | 49.529 | 55.941 |
| H | 37.78  | 50.041 | 54.669 |
| O | 30.923 | 53.263 | 57.371 |
| H | 30.943 | 52.861 | 56.502 |
| H | 31.253 | 52.582 | 57.957 |
| O | 38.142 | 57.26  | 56.761 |
| H | 37.773 | 58.051 | 57.153 |
| H | 37.573 | 57.075 | 56.014 |
| O | 38.809 | 47.616 | 55.08  |
| H | 39.755 | 47.544 | 54.952 |

|   |        |        |        |
|---|--------|--------|--------|
| H | 38.668 | 47.336 | 55.984 |
| O | 45.557 | 51.337 | 56.195 |
| H | 45.363 | 51.904 | 55.448 |
| H | 46.367 | 51.692 | 56.561 |
| O | 33.972 | 55.381 | 49.88  |
| H | 33.219 | 54.826 | 50.082 |
| H | 34.596 | 54.794 | 49.453 |
| O | 41.284 | 54.809 | 54.279 |
| H | 41.047 | 55.092 | 55.162 |
| H | 40.584 | 54.209 | 54.023 |
| O | 41.777 | 57.447 | 50.601 |
| H | 41.388 | 56.573 | 50.631 |
| H | 42.561 | 57.342 | 50.063 |
| O | 48.667 | 58.476 | 57.195 |
| H | 49.181 | 57.733 | 56.879 |
| H | 48.789 | 59.152 | 56.529 |
| O | 37.067 | 57.054 | 53.667 |
| H | 36.832 | 57.358 | 52.79  |
| H | 36.706 | 57.717 | 54.255 |
| O | 41.764 | 65.501 | 51.923 |
| H | 41.896 | 65.396 | 50.981 |
| H | 41.737 | 64.606 | 52.262 |
| O | 53.749 | 38.346 | 47.299 |
| H | 53.566 | 38.884 | 46.529 |
| H | 54.667 | 38.525 | 47.503 |
| O | 30.983 | 58.422 | 57.503 |
| H | 31.341 | 58.354 | 58.389 |
| H | 30.757 | 59.347 | 57.406 |
| O | 22.743 | 49.635 | 56.537 |
| H | 22.311 | 49.229 | 57.288 |
| H | 23.548 | 50.007 | 56.896 |
| O | 37.217 | 49.108 | 59.958 |
| H | 36.797 | 49.254 | 59.11  |
| H | 37.184 | 48.159 | 60.081 |
| O | 38.751 | 45.311 | 52.751 |
| H | 38.111 | 44.748 | 52.317 |
| H | 38.241 | 46.06  | 53.061 |
| O | 33.416 | 59.747 | 59.069 |
| H | 33.056 | 60.614 | 59.256 |
| H | 32.851 | 59.143 | 59.551 |
| O | 30.008 | 59.961 | 52.409 |
| H | 29.978 | 60.554 | 53.159 |
| H | 30.305 | 59.127 | 52.774 |
| O | 38.539 | 49.622 | 52.867 |
| H | 38.843 | 48.817 | 53.287 |
| H | 39.321 | 49.987 | 52.454 |
| O | 35.666 | 45.795 | 62.007 |

|   |        |        |        |
|---|--------|--------|--------|
| H | 35.618 | 45.133 | 62.697 |
| H | 35.897 | 46.602 | 62.466 |
| O | 27.102 | 49.074 | 52.042 |
| H | 26.267 | 48.64  | 51.864 |
| H | 27.73  | 48.358 | 52.13  |
| O | 30.342 | 58.448 | 48.066 |
| H | 29.835 | 58.425 | 48.878 |
| H | 31.246 | 58.3   | 48.344 |
| O | 40.427 | 61.045 | 63.75  |
| H | 39.916 | 60.319 | 63.392 |
| H | 40.434 | 61.7   | 63.052 |
| O | 32.471 | 56.846 | 55.615 |
| H | 33.016 | 56.242 | 56.12  |
| H | 31.993 | 57.347 | 56.276 |
| O | 39.692 | 55.428 | 59.428 |
| H | 40.171 | 55.902 | 60.107 |
| H | 38.774 | 55.499 | 59.69  |
| O | 39.115 | 53.068 | 54.261 |
| H | 38.591 | 53.285 | 55.033 |
| H | 38.633 | 52.359 | 53.836 |
| O | 40.227 | 52.602 | 59.111 |
| H | 40.031 | 53.517 | 59.311 |
| H | 39.95  | 52.121 | 59.891 |
| O | 37.578 | 55.575 | 43.54  |
| H | 38.388 | 55.553 | 43.03  |
| H | 36.942 | 55.107 | 42.999 |
| O | 25.591 | 45.306 | 54.434 |
| H | 25.524 | 44.701 | 55.172 |
| H | 25.558 | 44.744 | 53.66  |
| O | 51.446 | 56.592 | 53.814 |
| H | 50.583 | 56.294 | 54.102 |
| H | 52.05  | 56.243 | 54.47  |
| O | 39.894 | 57.961 | 53.407 |
| H | 39.051 | 58.402 | 53.302 |
| H | 39.682 | 57.028 | 53.369 |
| O | 43.394 | 52.516 | 50.724 |
| H | 43.236 | 52.621 | 49.785 |
| H | 43.388 | 53.408 | 51.07  |
| O | 43.089 | 57.534 | 53.29  |
| H | 42.179 | 57.707 | 53.048 |
| H | 43.544 | 58.359 | 53.117 |
| O | 46.145 | 55.426 | 52.834 |
| H | 46.45  | 55.267 | 51.941 |
| H | 46.713 | 56.124 | 53.16  |
| O | 37.383 | 56.14  | 49.019 |
| H | 37.536 | 56.569 | 48.177 |
| H | 36.573 | 55.647 | 48.894 |

|   |        |        |        |
|---|--------|--------|--------|
| O | 33.681 | 51.801 | 53.881 |
| H | 34.434 | 51.596 | 53.326 |
| H | 33.997 | 52.487 | 54.469 |
| O | 31.066 | 57.414 | 52.894 |
| H | 31.748 | 57.512 | 52.23  |
| H | 30.68  | 56.556 | 52.717 |
| O | 34.279 | 58.708 | 48.288 |
| H | 34.275 | 59.656 | 48.154 |
| H | 34.999 | 58.556 | 48.9   |
| O | 50.788 | 57.978 | 51.157 |
| H | 51.652 | 57.872 | 51.555 |
| H | 50.214 | 58.203 | 51.888 |
| O | 38.127 | 53.327 | 50.816 |
| H | 37.314 | 53.025 | 50.411 |
| H | 37.843 | 53.807 | 51.594 |
| O | 33.571 | 49.172 | 59.728 |
| H | 34.139 | 49.426 | 60.456 |
| H | 34.173 | 48.992 | 59.006 |
| O | 28.948 | 54.295 | 45.321 |
| H | 29.793 | 54.202 | 44.881 |
| H | 28.339 | 54.534 | 44.622 |
| O | 41.433 | 63.215 | 53.607 |
| H | 41.385 | 62.261 | 53.669 |
| H | 42.183 | 63.453 | 54.151 |
| O | 33.84  | 59.215 | 54.171 |
| H | 33.661 | 58.312 | 53.908 |
| H | 33.679 | 59.225 | 55.115 |
| O | 31.819 | 49.682 | 47.147 |
| H | 32.486 | 50.367 | 47.112 |
| H | 31.432 | 49.769 | 48.018 |
| O | 36.634 | 61.614 | 59.67  |
| H | 37.15  | 61.502 | 58.871 |
| H | 36.003 | 62.3   | 59.453 |
| O | 43.411 | 60.486 | 49.392 |
| H | 43.511 | 61.32  | 48.932 |
| H | 43.605 | 59.823 | 48.73  |
| O | 38.971 | 53.687 | 40.791 |
| H | 38.156 | 53.997 | 40.394 |
| H | 38.744 | 52.839 | 41.173 |
| O | 41.76  | 58.01  | 55.788 |
| H | 42.511 | 57.945 | 55.2   |
| H | 41.24  | 57.228 | 55.601 |
| O | 47.667 | 46.458 | 43.888 |
| H | 47.623 | 45.566 | 43.543 |
| H | 47.813 | 47.005 | 43.116 |
| O | 42.077 | 51.793 | 53.523 |
| H | 42.768 | 52.404 | 53.266 |

|   |        |        |        |
|---|--------|--------|--------|
| H | 41.704 | 52.174 | 54.318 |
| O | 52.849 | 62.459 | 48.154 |
| H | 53.096 | 61.985 | 47.36  |
| H | 51.893 | 62.414 | 48.172 |
| O | 28.649 | 58.579 | 50.022 |
| H | 27.705 | 58.539 | 49.872 |
| H | 28.746 | 59.138 | 50.793 |
| O | 47.159 | 60.129 | 46.919 |
| H | 46.302 | 59.869 | 46.583 |
| H | 47.467 | 60.794 | 46.303 |
| O | 43.37  | 54.921 | 52.199 |
| H | 42.739 | 55.133 | 52.887 |
| H | 44.155 | 55.415 | 52.433 |
| O | 40.08  | 55.149 | 49.609 |
| H | 39.903 | 54.449 | 50.237 |
| H | 39.241 | 55.297 | 49.173 |
| O | 31.78  | 51.275 | 59.344 |
| H | 31.701 | 51.683 | 60.206 |
| H | 32.411 | 50.566 | 59.472 |
| O | 40.73  | 58.418 | 58.363 |
| H | 39.853 | 58.081 | 58.182 |
| H | 41.094 | 58.616 | 57.5   |
| O | 23.593 | 51.145 | 52.561 |
| H | 23.432 | 51.699 | 53.325 |
| H | 23.737 | 51.762 | 51.844 |
| O | 33.603 | 51.851 | 47.483 |
| H | 33.668 | 52.652 | 46.963 |
| H | 33.545 | 52.158 | 48.388 |
| O | 40.849 | 51.69  | 56.06  |
| H | 40.561 | 52.092 | 56.88  |
| H | 40.358 | 52.152 | 55.381 |
| O | 29.53  | 55.708 | 57.837 |
| H | 30.175 | 56.222 | 57.352 |
| H | 29.909 | 54.83  | 57.883 |
| O | 53.837 | 54.619 | 58.335 |
| H | 54.116 | 55.511 | 58.544 |
| H | 53.777 | 54.182 | 59.184 |
| O | 49.112 | 47.987 | 41.747 |
| H | 49.727 | 48.046 | 42.478 |
| H | 48.366 | 48.523 | 42.018 |
| O | 48.714 | 51.888 | 52.859 |
| H | 48.345 | 52.048 | 51.99  |
| H | 48.103 | 51.277 | 53.27  |
| O | 38.927 | 46.713 | 57.884 |
| H | 38.55  | 46.408 | 58.71  |
| H | 39.542 | 47.4   | 58.141 |
| O | 44.542 | 50.492 | 52.418 |

|   |        |        |        |
|---|--------|--------|--------|
| H | 44.242 | 49.748 | 51.897 |
| H | 43.994 | 51.223 | 52.13  |
| O | 50.753 | 51.532 | 50.686 |
| H | 50.854 | 51.548 | 49.734 |
| H | 50.268 | 50.726 | 50.862 |
| O | 32.188 | 53.899 | 51.818 |
| H | 32.72  | 54.57  | 52.246 |
| H | 31.301 | 54.054 | 52.141 |
| O | 44.949 | 53.545 | 54.566 |
| H | 44.136 | 53.923 | 54.902 |
| H | 45.371 | 54.264 | 54.096 |
| O | 31.023 | 52.442 | 54.869 |
| H | 31.701 | 52.267 | 54.216 |
| H | 30.369 | 52.961 | 54.401 |
| O | 53.674 | 45.849 | 53.34  |
| H | 53.045 | 45.413 | 52.765 |
| H | 53.88  | 45.197 | 54.01  |
| O | 33.819 | 49.397 | 55.462 |
| H | 33.664 | 50.171 | 54.92  |
| H | 33.989 | 48.695 | 54.834 |
| O | 36.236 | 54.356 | 52.7   |
| H | 36.881 | 54.771 | 53.274 |
| H | 35.591 | 55.042 | 52.53  |
| O | 43.387 | 55.151 | 33.561 |
| H | 44.25  | 55.177 | 33.975 |
| H | 43.447 | 55.783 | 32.844 |
| O | 43.586 | 65.836 | 40.304 |
| H | 43.239 | 65.65  | 41.177 |
| H | 44.525 | 65.959 | 40.441 |
| O | 37.046 | 60.518 | 36.393 |
| H | 36.668 | 60.121 | 35.608 |
| H | 36.298 | 60.896 | 36.854 |
| O | 30.135 | 53.908 | 28.102 |
| H | 30.17  | 53.668 | 27.176 |
| H | 31.011 | 54.244 | 28.295 |
| O | 26.128 | 58.145 | 42.8   |
| H | 26.343 | 57.264 | 43.107 |
| H | 25.789 | 58.592 | 43.576 |
| O | 31.526 | 50.62  | 43.409 |
| H | 30.704 | 50.379 | 43.837 |
| H | 31.604 | 50.006 | 42.679 |
| O | 36.788 | 57.63  | 41.762 |
| H | 36.85  | 57.277 | 42.65  |
| H | 36.177 | 57.045 | 41.314 |
| O | 29.363 | 52.214 | 32.526 |
| H | 28.952 | 52.675 | 33.257 |
| H | 28.702 | 52.227 | 31.833 |



|   |        |        |        |
|---|--------|--------|--------|
| O | 45.752 | 53.46  | 31.86  |
| H | 45.882 | 52.78  | 32.521 |
| H | 46.028 | 54.269 | 32.292 |
| O | 29.393 | 47.606 | 36.109 |
| H | 30.163 | 47.759 | 35.563 |
| H | 28.698 | 48.116 | 35.693 |
| O | 30.532 | 63.752 | 39.54  |
| H | 29.825 | 63.574 | 38.92  |
| H | 30.93  | 64.563 | 39.223 |
| O | 45.89  | 55.153 | 47.044 |
| H | 46.368 | 55.663 | 47.698 |
| H | 45.868 | 55.716 | 46.27  |
| O | 31.878 | 40.361 | 43.187 |
| H | 31.446 | 41.107 | 43.604 |
| H | 31.357 | 39.603 | 43.455 |
| O | 44.41  | 52.605 | 43.169 |
| H | 44.87  | 52.735 | 42.339 |
| H | 44.388 | 53.474 | 43.569 |
| O | 30.67  | 45.147 | 47.323 |
| H | 31.503 | 45.382 | 47.732 |
| H | 30.794 | 45.345 | 46.395 |
| O | 42.6   | 47.589 | 42.997 |
| H | 43.197 | 48.337 | 43.019 |
| H | 42.353 | 47.454 | 43.912 |
| O | 42.919 | 42.213 | 34.415 |
| H | 43.492 | 42.222 | 33.648 |
| H | 42.423 | 43.03  | 34.353 |
| O | 43.069 | 52.823 | 48.037 |
| H | 42.315 | 52.518 | 47.532 |
| H | 43.82  | 52.668 | 47.464 |
| O | 42.212 | 54.207 | 35.832 |
| H | 42.941 | 54.005 | 36.42  |
| H | 42.627 | 54.602 | 35.065 |
| O | 41.512 | 62.534 | 27.625 |
| H | 41.858 | 62.148 | 26.82  |
| H | 41.884 | 63.416 | 27.646 |
| O | 47.962 | 59.206 | 40.287 |
| H | 47.989 | 58.871 | 39.39  |
| H | 47.314 | 58.657 | 40.729 |
| O | 43.933 | 58.216 | 31.804 |
| H | 43.671 | 58.855 | 32.467 |
| H | 43.665 | 58.609 | 30.973 |
| O | 42.332 | 47.66  | 45.991 |
| H | 41.9   | 47.262 | 46.747 |
| H | 42.834 | 48.388 | 46.358 |
| O | 35.485 | 50.334 | 34.167 |
| H | 35.979 | 50.744 | 34.876 |

|   |        |        |        |
|---|--------|--------|--------|
| H | 35.175 | 49.507 | 34.537 |
| O | 37.18  | 56.994 | 46.316 |
| H | 37.265 | 56.268 | 45.698 |
| H | 37.712 | 57.695 | 45.937 |
| O | 41.209 | 62.292 | 30.851 |
| H | 41.888 | 62.927 | 31.078 |
| H | 41.349 | 62.116 | 29.92  |
| O | 40.404 | 55.055 | 42.632 |
| H | 40.441 | 54.392 | 43.322 |
| H | 40.073 | 54.586 | 41.867 |
| O | 44.116 | 44.92  | 29.778 |
| H | 44.604 | 44.759 | 28.97  |
| H | 43.761 | 44.063 | 30.017 |
| O | 32.011 | 54.816 | 32.608 |
| H | 32.733 | 54.277 | 32.283 |
| H | 31.92  | 54.566 | 33.527 |
| O | 37.331 | 57.429 | 32.758 |
| H | 38.094 | 57.097 | 32.285 |
| H | 36.718 | 56.694 | 32.768 |
| O | 45.498 | 52.33  | 47.067 |
| H | 45.784 | 53.234 | 47.196 |
| H | 46.23  | 51.8   | 47.382 |
| O | 31.389 | 54.249 | 38.606 |
| H | 30.704 | 54.91  | 38.507 |
| H | 32.19  | 54.753 | 38.747 |
| O | 38.01  | 49.909 | 46.491 |
| H | 37.099 | 50.127 | 46.296 |
| H | 38.02  | 49.739 | 47.433 |
| O | 43.254 | 44.338 | 47.838 |
| H | 43.957 | 43.716 | 47.65  |
| H | 42.454 | 43.814 | 47.802 |
| O | 43.951 | 49.863 | 46.781 |
| H | 43.132 | 50.269 | 46.496 |
| H | 44.559 | 50.595 | 46.883 |
| O | 38.404 | 48.092 | 35.974 |
| H | 37.607 | 48.576 | 36.192 |
| H | 38.387 | 48.019 | 35.02  |
| O | 43.549 | 55.958 | 38.718 |
| H | 43.494 | 55.044 | 38.439 |
| H | 43.588 | 55.915 | 39.674 |
| O | 33.852 | 53.232 | 40.585 |
| H | 34.428 | 52.471 | 40.667 |
| H | 33.865 | 53.443 | 39.652 |
| O | 42.293 | 52.826 | 32.176 |
| H | 42.553 | 53.52  | 31.57  |
| H | 42.546 | 53.154 | 33.039 |
| O | 47.892 | 53.772 | 37.99  |

|   |        |        |        |
|---|--------|--------|--------|
| H | 47.298 | 53.193 | 37.513 |
| H | 47.528 | 54.648 | 37.86  |
| O | 43.165 | 50.828 | 33.99  |
| H | 42.323 | 50.538 | 34.339 |
| H | 42.978 | 51.067 | 33.082 |
| O | 33.547 | 49.719 | 38.086 |
| H | 33.627 | 48.934 | 38.628 |
| H | 33.046 | 50.332 | 38.625 |
| O | 41.462 | 50.469 | 47.843 |
| H | 41.951 | 49.787 | 48.304 |
| H | 40.782 | 50.737 | 48.461 |
| O | 31.574 | 61.64  | 40.577 |
| H | 30.772 | 61.141 | 40.729 |
| H | 31.272 | 62.472 | 40.211 |
| O | 27.145 | 53.603 | 37.274 |
| H | 27.826 | 54.029 | 37.794 |
| H | 27.148 | 52.694 | 37.573 |
| O | 50.177 | 50.566 | 36.493 |
| H | 50.477 | 50.08  | 37.261 |
| H | 50.322 | 51.485 | 36.72  |
| O | 38.292 | 50.623 | 40.604 |
| H | 38.52  | 50.666 | 41.532 |
| H | 38.822 | 49.903 | 40.26  |
| O | 29.551 | 56.222 | 34.51  |
| H | 30.251 | 56.596 | 33.976 |
| H | 29.493 | 55.31  | 34.225 |
| O | 36.684 | 47.903 | 29.022 |
| H | 35.782 | 48.123 | 29.255 |
| H | 36.744 | 48.098 | 28.087 |
| O | 41.722 | 53.337 | 40.383 |
| H | 41.786 | 52.937 | 39.515 |
| H | 40.783 | 53.355 | 40.569 |
| O | 34.848 | 61.496 | 25.888 |
| H | 34.97  | 61.452 | 24.939 |
| H | 33.995 | 61.089 | 26.038 |
| O | 47.962 | 44.372 | 47.049 |
| H | 48.357 | 45.181 | 46.724 |
| H | 47.083 | 44.366 | 46.669 |
| O | 42.344 | 51.705 | 44.978 |
| H | 42.959 | 51.959 | 44.289 |
| H | 41.656 | 52.369 | 44.941 |
| O | 28.379 | 53.751 | 34.887 |
| H | 27.973 | 53.639 | 35.746 |
| H | 27.654 | 53.985 | 34.308 |
| O | 40.591 | 45.453 | 49.885 |
| H | 40.195 | 45.664 | 50.731 |
| H | 41.138 | 44.688 | 50.061 |

|   |        |        |        |
|---|--------|--------|--------|
| O | 47.936 | 63.492 | 42.435 |
| H | 47.777 | 64.374 | 42.772 |
| H | 47.238 | 62.961 | 42.819 |
| O | 37.392 | 51.873 | 38.43  |
| H | 37.532 | 51.432 | 39.267 |
| H | 37.113 | 52.757 | 38.669 |
| O | 41.263 | 57.717 | 46.311 |
| H | 41.416 | 56.998 | 46.924 |
| H | 41.599 | 57.394 | 45.475 |
| O | 47.538 | 49.405 | 26.698 |
| H | 46.911 | 48.776 | 27.056 |
| H | 48.122 | 48.877 | 26.153 |
| O | 36.72  | 54.87  | 39.199 |
| H | 36.149 | 55.353 | 39.797 |
| H | 36.529 | 55.237 | 38.336 |
| O | 35.886 | 53.968 | 48.013 |
| H | 36.088 | 53.775 | 47.098 |
| H | 36.163 | 53.185 | 48.49  |
| O | 42.21  | 55.572 | 48.032 |
| H | 41.392 | 55.345 | 48.474 |
| H | 42.713 | 54.758 | 48.027 |
| O | 42.103 | 55.738 | 27.541 |
| H | 41.429 | 56.395 | 27.367 |
| H | 42.928 | 56.221 | 27.491 |
| O | 50.962 | 58.634 | 45.934 |
| H | 51.569 | 58.076 | 46.42  |
| H | 50.099 | 58.413 | 46.285 |
| O | 26.867 | 48.528 | 35.15  |
| H | 26.628 | 48.973 | 35.963 |
| H | 26.457 | 49.051 | 34.461 |
| O | 36.813 | 60.169 | 40.9   |
| H | 36.913 | 59.298 | 41.283 |
| H | 35.889 | 60.384 | 41.031 |
| O | 35.46  | 47.395 | 31.954 |
| H | 34.986 | 47.473 | 32.782 |
| H | 35.126 | 48.115 | 31.418 |
| O | 36.334 | 57.53  | 51.141 |
| H | 35.57  | 56.981 | 50.967 |
| H | 36.936 | 57.337 | 50.421 |
| O | 39.733 | 61.894 | 33.022 |
| H | 39.212 | 61.175 | 32.664 |
| H | 40.291 | 62.17  | 32.295 |
| O | 45.558 | 52.551 | 40.726 |
| H | 45.064 | 53.137 | 40.152 |
| H | 45.709 | 51.768 | 40.196 |
| O | 39.251 | 53.616 | 32.874 |
| H | 39.935 | 54.196 | 33.207 |

|   |        |        |        |
|---|--------|--------|--------|
| H | 38.738 | 54.165 | 32.28  |
| O | 40.456 | 51.036 | 31.015 |
| H | 39.634 | 50.892 | 31.483 |
| H | 40.828 | 51.82  | 31.419 |
| O | 35.49  | 60.759 | 45.683 |
| H | 36.248 | 60.317 | 46.064 |
| H | 35     | 61.087 | 46.437 |
| O | 32.961 | 46.325 | 36.864 |
| H | 33.049 | 46.617 | 37.771 |
| H | 32.024 | 46.162 | 36.754 |
| O | 38.099 | 46.954 | 33.478 |
| H | 37.889 | 46.079 | 33.151 |
| H | 38.279 | 47.468 | 32.691 |
| O | 53.772 | 43.479 | 45.526 |
| H | 52.93  | 43.056 | 45.697 |
| H | 54.215 | 42.893 | 44.913 |
| O | 32.939 | 57.154 | 38.717 |
| H | 32.411 | 57.888 | 38.401 |
| H | 33.432 | 56.866 | 37.949 |
| O | 37.265 | 60.271 | 32.622 |
| H | 36.986 | 59.363 | 32.506 |
| H | 36.6   | 60.656 | 33.193 |
| O | 38.68  | 51.341 | 34.195 |
| H | 37.824 | 51.39  | 34.622 |
| H | 38.852 | 52.236 | 33.9   |
| O | 32.647 | 60.644 | 52.132 |
| H | 33.141 | 60.219 | 52.834 |
| H | 31.739 | 60.383 | 52.287 |
| O | 48.345 | 61.566 | 45.054 |
| H | 48.766 | 62.369 | 44.749 |
| H | 48.783 | 60.866 | 44.569 |
| O | 33.693 | 53.787 | 45.408 |
| H | 33.162 | 53.359 | 44.737 |
| H | 33.752 | 54.698 | 45.122 |
| O | 40.851 | 58.592 | 32.792 |
| H | 39.903 | 58.684 | 32.689 |
| H | 41.078 | 57.832 | 32.257 |
| O | 35.63  | 50.663 | 45.89  |
| H | 35.025 | 50.981 | 46.56  |
| H | 35.064 | 50.352 | 45.184 |
| O | 39.9   | 57.506 | 27.376 |
| H | 39.093 | 57.625 | 26.875 |
| H | 40.016 | 58.334 | 27.843 |
| O | 44.896 | 57.787 | 37.168 |
| H | 45.204 | 58.29  | 37.922 |
| H | 44.35  | 57.098 | 37.547 |
| O | 55.113 | 56.838 | 52.822 |

|   |        |        |        |
|---|--------|--------|--------|
| H | 54.73  | 56.52  | 53.64  |
| H | 56.031 | 56.569 | 52.868 |
| O | 35.193 | 47.544 | 45.852 |
| H | 34.971 | 48.023 | 45.054 |
| H | 35.004 | 46.629 | 45.643 |
| O | 46.892 | 54.779 | 50.425 |
| H | 46.748 | 53.832 | 50.42  |
| H | 47.786 | 54.886 | 50.1   |
| O | 43.124 | 59.379 | 29.421 |
| H | 42.232 | 59.41  | 29.074 |
| H | 43.351 | 60.295 | 29.579 |
| O | 47.376 | 54.529 | 41.693 |
| H | 47.434 | 54.519 | 42.648 |
| H | 46.92  | 53.717 | 41.471 |
| O | 41.805 | 59.411 | 41.19  |
| H | 42.753 | 59.524 | 41.262 |
| H | 41.675 | 59.027 | 40.323 |
| O | 34.222 | 49.312 | 30.151 |
| H | 33.404 | 49.635 | 30.53  |
| H | 33.959 | 48.901 | 29.328 |
| O | 37.904 | 46.46  | 45.722 |
| H | 38.608 | 46.409 | 46.367 |
| H | 37.325 | 47.147 | 46.054 |
| O | 42.44  | 51     | 41.75  |
| H | 42.212 | 51.787 | 41.256 |
| H | 43.33  | 51.162 | 42.063 |
| O | 41.055 | 48.558 | 29.869 |
| H | 40.959 | 49.484 | 30.093 |
| H | 40.201 | 48.174 | 30.07  |
| O | 36.738 | 50.882 | 31.617 |
| H | 36.847 | 49.987 | 31.296 |
| H | 36.433 | 50.778 | 32.519 |
| O | 34.015 | 50.188 | 27.055 |
| H | 33.151 | 49.79  | 27.16  |
| H | 34.537 | 49.516 | 26.615 |
| O | 41.915 | 61.871 | 37.65  |
| H | 41.394 | 61.113 | 37.385 |
| H | 41.303 | 62.606 | 37.617 |
| O | 35.436 | 55.338 | 32.685 |
| H | 35.519 | 54.805 | 33.476 |
| H | 35.856 | 54.818 | 32     |
| O | 48.683 | 56.854 | 31.686 |
| H | 47.768 | 56.588 | 31.766 |
| H | 48.945 | 56.555 | 30.815 |
| O | 37.049 | 51.833 | 27.97  |
| H | 36.746 | 51.484 | 27.132 |
| H | 37.961 | 51.549 | 28.032 |

|   |        |        |        |
|---|--------|--------|--------|
| O | 50.621 | 59.14  | 31.141 |
| H | 50.752 | 58.729 | 30.287 |
| H | 49.8   | 58.767 | 31.463 |
| O | 34.172 | 60.744 | 41.249 |
| H | 33.33  | 61.019 | 40.888 |
| H | 33.945 | 60.225 | 42.021 |
| O | 49.215 | 61.58  | 39.882 |
| H | 49.259 | 62.1   | 40.684 |
| H | 48.673 | 60.827 | 40.113 |
| O | 29.446 | 53.638 | 51.886 |
| H | 29.051 | 54.505 | 51.976 |
| H | 29.367 | 53.433 | 50.954 |
| O | 43.131 | 48.375 | 51.101 |
| H | 42.704 | 48.291 | 50.248 |
| H | 43.356 | 47.478 | 51.345 |
| O | 35.881 | 53.891 | 42.451 |
| H | 35.997 | 53.03  | 42.854 |
| H | 35.128 | 53.785 | 41.871 |
| O | 51.925 | 58.129 | 35.786 |
| H | 51.395 | 58.925 | 35.745 |
| H | 51.35  | 57.441 | 35.453 |
| O | 45.711 | 57.233 | 49.802 |
| H | 45.759 | 56.303 | 50.025 |
| H | 46.367 | 57.648 | 50.362 |
| O | 33.119 | 54.911 | 28.958 |
| H | 32.891 | 54.756 | 29.875 |
| H | 33.181 | 55.863 | 28.885 |
| O | 40.99  | 50.023 | 35.435 |
| H | 40.973 | 49.123 | 35.109 |
| H | 40.341 | 50.482 | 34.902 |
| O | 30.968 | 50.115 | 39.092 |
| H | 30.239 | 49.521 | 38.91  |
| H | 30.679 | 50.961 | 38.751 |
| O | 45.981 | 55.045 | 34.351 |
| H | 46.492 | 55.609 | 34.932 |
| H | 46.325 | 54.166 | 34.507 |
| O | 48.128 | 50.771 | 39.509 |
| H | 47.727 | 50.211 | 38.843 |
| H | 48.02  | 51.66  | 39.17  |
| O | 47.026 | 43.911 | 27.515 |
| H | 47.64  | 43.508 | 28.129 |
| H | 47.24  | 44.843 | 27.54  |
| O | 53.412 | 50.342 | 33.083 |
| H | 53.893 | 49.578 | 33.401 |
| H | 52.709 | 49.977 | 32.547 |
| O | 29.136 | 53.422 | 42.72  |
| H | 28.655 | 52.621 | 42.927 |

|   |        |        |        |
|---|--------|--------|--------|
| H | 29.276 | 53.381 | 41.774 |
| O | 47.627 | 50.517 | 48.067 |
| H | 47.394 | 50.084 | 47.246 |
| H | 47.983 | 49.816 | 48.614 |
| O | 47.221 | 47.781 | 37.45  |
| H | 46.4   | 47.551 | 37.885 |
| H | 47.48  | 46.983 | 36.99  |
| O | 30.133 | 48.959 | 45.178 |
| H | 30.394 | 48.088 | 44.877 |
| H | 30.704 | 49.135 | 45.925 |
| O | 40.17  | 48.833 | 45.045 |
| H | 39.632 | 49.269 | 45.707 |
| H | 40.814 | 48.336 | 45.55  |
| O | 45.91  | 56.744 | 40.879 |
| H | 45.06  | 56.329 | 41.024 |
| H | 46.548 | 56.086 | 41.156 |
| O | 34.084 | 49.724 | 44.086 |
| H | 33.163 | 49.98  | 44.139 |
| H | 34.072 | 48.873 | 43.65  |
| O | 36.589 | 52.482 | 35.982 |
| H | 37.065 | 52.219 | 36.769 |
| H | 36.672 | 53.436 | 35.959 |
| O | 45.909 | 50.127 | 33.125 |
| H | 45.018 | 50.137 | 33.472 |
| H | 46.461 | 49.94  | 33.885 |
| O | 34.702 | 56.28  | 40.615 |
| H | 34.276 | 56.892 | 40.015 |
| H | 33.982 | 55.784 | 41.004 |
| O | 41.187 | 44.633 | 34.548 |
| H | 40.527 | 44.935 | 35.172 |
| H | 40.722 | 44.585 | 33.713 |
| O | 46.329 | 46.408 | 31.255 |
| H | 45.51  | 46.054 | 30.909 |
| H | 46.251 | 47.354 | 31.137 |
| O | 36.14  | 45.265 | 30.118 |
| H | 35.485 | 44.699 | 29.709 |
| H | 35.645 | 45.782 | 30.754 |
| O | 34.682 | 53.402 | 38.113 |
| H | 34.848 | 54.053 | 37.431 |
| H | 34.81  | 52.56  | 37.676 |
| O | 38.416 | 49.084 | 49.005 |
| H | 37.486 | 48.917 | 49.158 |
| H | 38.563 | 49.962 | 49.359 |
| O | 36.809 | 45.264 | 49.013 |
| H | 35.869 | 45.106 | 49.096 |
| H | 37.204 | 44.731 | 49.703 |
| O | 43.473 | 53.714 | 15.25  |



|   |        |        |        |
|---|--------|--------|--------|
| H | 42.953 | 52.928 | 15.086 |
| H | 42.972 | 54.422 | 14.845 |
| O | 44.149 | 61.894 | 29.89  |
| H | 44.939 | 62.123 | 30.379 |
| H | 44.253 | 62.336 | 29.047 |
| O | 30.54  | 50.75  | 18.129 |
| H | 30.67  | 49.991 | 17.561 |
| H | 29.786 | 51.204 | 17.753 |
| O | 31.671 | 44.477 | 17.783 |
| H | 31.318 | 44.938 | 17.022 |
| H | 32.115 | 43.712 | 17.415 |
| O | 28.503 | 67.087 | 12.322 |
| H | 27.931 | 67.854 | 12.355 |
| H | 28.029 | 66.458 | 11.778 |
| O | 29.31  | 49.502 | 23.128 |
| H | 29.144 | 49.935 | 22.291 |
| H | 28.786 | 48.702 | 23.093 |
| O | 37.791 | 57.828 | 24.974 |
| H | 37.124 | 57.594 | 25.619 |
| H | 37.656 | 57.211 | 24.255 |
| O | 32.081 | 51.588 | 14.562 |
| H | 32.365 | 52.431 | 14.913 |
| H | 32.826 | 51.004 | 14.707 |
| O | 43.883 | 50.093 | 13.873 |
| H | 43.066 | 50.471 | 14.197 |
| H | 43.795 | 50.113 | 12.92  |
| O | 31.378 | 54.463 | 20.376 |
| H | 31.841 | 53.696 | 20.714 |
| H | 31.791 | 54.637 | 19.529 |
| O | 36.737 | 51.034 | 25.297 |
| H | 35.897 | 51.039 | 24.839 |
| H | 37.261 | 51.695 | 24.845 |
| O | 47.113 | 52.611 | 20.893 |
| H | 47.247 | 52.73  | 19.952 |
| H | 47.136 | 51.663 | 21.02  |
| O | 34.115 | 45.845 | 21.242 |
| H | 34.391 | 45.485 | 20.399 |
| H | 33.366 | 46.401 | 21.031 |
| O | 41.837 | 51.444 | 10.286 |
| H | 41.844 | 51.232 | 9.353  |
| H | 42.689 | 51.147 | 10.606 |
| O | 33.24  | 48.2   | 17.696 |
| H | 32.983 | 48.202 | 16.774 |
| H | 34.027 | 47.657 | 17.725 |
| O | 47.418 | 49.01  | 31.012 |
| H | 47.076 | 49.475 | 30.249 |
| H | 46.821 | 49.244 | 31.723 |

|   |        |        |        |
|---|--------|--------|--------|
| O | 36.434 | 42.126 | 20.406 |
| H | 35.688 | 41.899 | 20.96  |
| H | 36.104 | 42.816 | 19.831 |
| O | 43.737 | 62.077 | 25.065 |
| H | 44.045 | 61.254 | 24.687 |
| H | 44.478 | 62.395 | 25.582 |
| O | 39.47  | 58.846 | 19.556 |
| H | 39.777 | 59.711 | 19.824 |
| H | 38.785 | 58.628 | 20.188 |
| O | 46.896 | 52.239 | 11.614 |
| H | 46.571 | 52.889 | 12.238 |
| H | 47.834 | 52.182 | 11.794 |
| O | 50.212 | 52.82  | 29.098 |
| H | 50.182 | 52.288 | 28.303 |
| H | 49.605 | 52.389 | 29.699 |
| O | 39.896 | 63.976 | 16.983 |
| H | 39.852 | 63.972 | 17.939 |
| H | 38.988 | 64.09  | 16.702 |
| O | 48.023 | 58.545 | 23.769 |
| H | 48.934 | 58.306 | 23.599 |
| H | 47.601 | 58.507 | 22.911 |
| O | 37.381 | 56.028 | 23.049 |
| H | 36.778 | 55.435 | 22.601 |
| H | 38.2   | 55.952 | 22.559 |
| O | 25.806 | 53.585 | 25.653 |
| H | 25.756 | 53.583 | 26.609 |
| H | 26.345 | 52.823 | 25.44  |
| O | 48.545 | 51.204 | 14.291 |
| H | 47.656 | 51.038 | 14.607 |
| H | 48.71  | 52.121 | 14.51  |
| O | 28.637 | 62.746 | 17.906 |
| H | 29.167 | 63.298 | 18.48  |
| H | 29.271 | 62.186 | 17.458 |
| O | 42.334 | 45.71  | 13.363 |
| H | 41.507 | 45.237 | 13.457 |
| H | 42.233 | 46.21  | 12.553 |
| O | 30.436 | 50.095 | 20.806 |
| H | 30.328 | 50.109 | 19.856 |
| H | 30.872 | 50.923 | 21.01  |
| O | 32.339 | 64.742 | 27.831 |
| H | 33.072 | 64.411 | 27.312 |
| H | 31.626 | 64.847 | 27.201 |
| O | 39.539 | 56.671 | 38.169 |
| H | 39.177 | 55.874 | 38.556 |
| H | 40.003 | 56.369 | 37.388 |
| O | 32.51  | 51.97  | 21.199 |
| H | 33.438 | 51.971 | 20.961 |

|   |        |        |        |
|---|--------|--------|--------|
| H | 32.427 | 51.261 | 21.836 |
| O | 42.051 | 45.877 | 22.074 |
| H | 42.889 | 45.447 | 22.244 |
| H | 41.92  | 45.781 | 21.131 |
| O | 46.72  | 58.112 | 21.19  |
| H | 46.607 | 57.744 | 20.314 |
| H | 45.897 | 57.918 | 21.639 |
| O | 38.441 | 53.074 | 24.093 |
| H | 38.781 | 53.744 | 24.686 |
| H | 38.427 | 53.498 | 23.235 |
| O | 40.662 | 49.656 | 26.357 |
| H | 41.148 | 49.248 | 27.073 |
| H | 41.319 | 49.814 | 25.679 |
| O | 31.771 | 48.002 | 22.215 |
| H | 31.259 | 47.255 | 22.526 |
| H | 31.316 | 48.767 | 22.567 |
| O | 40.399 | 61.568 | 20.248 |
| H | 40.818 | 61.613 | 19.388 |
| H | 40.846 | 62.236 | 20.767 |
| O | 41.019 | 60.663 | 11.183 |
| H | 41.796 | 60.384 | 10.7   |
| H | 40.291 | 60.232 | 10.735 |
| O | 37.842 | 48.611 | 26.455 |
| H | 38.57  | 49.201 | 26.651 |
| H | 37.324 | 49.079 | 25.8   |
| O | 44.886 | 54.126 | 17.614 |
| H | 44.424 | 54.117 | 16.775 |
| H | 44.197 | 54.007 | 18.267 |
| O | 30.799 | 50.11  | 28.72  |
| H | 31.06  | 50.973 | 28.398 |
| H | 30.668 | 50.235 | 29.66  |
| O | 31.982 | 59.756 | 27.885 |
| H | 31.961 | 60.132 | 27.005 |
| H | 31.735 | 60.48  | 28.461 |
| O | 23.748 | 50.267 | 20.386 |
| H | 23.266 | 49.766 | 21.043 |
| H | 24.423 | 50.728 | 20.884 |
| O | 27.583 | 60.022 | 9.701  |
| H | 27.363 | 59.877 | 8.78   |
| H | 27.597 | 60.975 | 9.796  |
| O | 39.67  | 54.685 | 26.106 |
| H | 40.432 | 55.224 | 26.321 |
| H | 39.148 | 54.679 | 26.908 |
| O | 41.141 | 53.704 | 21.611 |
| H | 40.655 | 54.526 | 21.667 |
| H | 40.585 | 53.132 | 21.082 |
| O | 34.678 | 50.577 | 23.619 |

|   |        |        |        |
|---|--------|--------|--------|
| H | 33.736 | 50.72  | 23.719 |
| H | 34.753 | 49.666 | 23.336 |
| O | 32.501 | 46.419 | 14.232 |
| H | 31.629 | 46.663 | 14.542 |
| H | 32.455 | 45.471 | 14.109 |
| O | 40.226 | 52.411 | 17.02  |
| H | 40.904 | 53.087 | 17.001 |
| H | 39.406 | 52.897 | 17.11  |
| O | 42.29  | 61.224 | 14.713 |
| H | 42.935 | 61.689 | 15.246 |
| H | 42.678 | 60.362 | 14.564 |
| O | 41.983 | 51.449 | 37.779 |
| H | 41.541 | 51.285 | 36.945 |
| H | 42.149 | 50.577 | 38.137 |
| O | 42.671 | 54.866 | 19.779 |
| H | 43.36  | 54.955 | 20.438 |
| H | 41.944 | 54.456 | 20.248 |
| O | 27.181 | 51.649 | 24.796 |
| H | 26.65  | 50.862 | 24.921 |
| H | 27.766 | 51.43  | 24.07  |
| O | 34.658 | 57.75  | 23.029 |
| H | 33.769 | 57.397 | 23.059 |
| H | 35.207 | 56.997 | 22.813 |
| O | 44.564 | 57.157 | 22.222 |
| H | 44.707 | 56.224 | 22.062 |
| H | 43.625 | 57.229 | 22.396 |
| O | 35.332 | 52.657 | 14.177 |
| H | 36.206 | 52.482 | 14.526 |
| H | 35.265 | 53.611 | 14.167 |
| O | 35.783 | 64.252 | 23.483 |
| H | 36.359 | 64.566 | 22.786 |
| H | 34.933 | 64.648 | 23.289 |
| O | 40.178 | 54.337 | 13.148 |
| H | 40.398 | 55.184 | 13.535 |
| H | 40.876 | 54.174 | 12.514 |
| O | 36.666 | 60.947 | 18.598 |
| H | 36.77  | 60.735 | 19.526 |
| H | 36.436 | 61.876 | 18.589 |
| O | 35.136 | 54.33  | 22.592 |
| H | 34.218 | 54.596 | 22.656 |
| H | 35.114 | 53.512 | 22.096 |
| O | 34.185 | 52.937 | 31.278 |
| H | 34.753 | 52.313 | 30.826 |
| H | 33.794 | 52.431 | 31.991 |
| O | 41.314 | 54.974 | 17.2   |
| H | 41.896 | 54.975 | 17.96  |
| H | 41.576 | 55.744 | 16.696 |

|   |        |        |        |
|---|--------|--------|--------|
| O | 38.345 | 63.408 | 25.343 |
| H | 37.879 | 62.834 | 25.951 |
| H | 38.83  | 62.811 | 24.773 |
| O | 28.557 | 56.348 | 11.877 |
| H | 28.292 | 55.621 | 12.44  |
| H | 28.556 | 55.98  | 10.994 |
| O | 38.738 | 55.058 | 16.517 |
| H | 39.61  | 55.088 | 16.911 |
| H | 38.294 | 55.834 | 16.86  |
| O | 24.584 | 48.684 | 18.332 |
| H | 24.321 | 49.037 | 19.182 |
| H | 24.331 | 47.762 | 18.367 |
| O | 27.293 | 51.696 | 30.492 |
| H | 27.687 | 51.332 | 29.7   |
| H | 26.485 | 51.196 | 30.61  |
| O | 33.29  | 62.369 | 9.905  |
| H | 32.886 | 62.961 | 10.54  |
| H | 34.2   | 62.659 | 9.853  |
| O | 39.844 | 51.679 | 19.772 |
| H | 39.871 | 51.776 | 18.82  |
| H | 40.269 | 50.837 | 19.939 |
| O | 50.387 | 52.712 | 17.464 |
| H | 49.489 | 52.451 | 17.664 |
| H | 50.616 | 53.333 | 18.155 |
| O | 30.929 | 59.504 | 22.716 |
| H | 30.132 | 59.924 | 22.393 |
| H | 30.642 | 58.639 | 23.01  |
| O | 29.66  | 61.874 | 24.791 |
| H | 28.918 | 62.045 | 24.21  |
| H | 29.271 | 61.806 | 25.663 |
| O | 44.966 | 45.453 | 14.953 |
| H | 44.144 | 45.568 | 14.476 |
| H | 45.59  | 46.013 | 14.493 |
| O | 34.916 | 53.285 | 18.964 |
| H | 34.68  | 52.587 | 18.352 |
| H | 35.269 | 52.825 | 19.726 |
| O | 44.005 | 52.723 | 22.785 |
| H | 43.095 | 52.974 | 22.943 |
| H | 44.444 | 52.872 | 23.623 |
| O | 42.496 | 57.149 | 15.972 |
| H | 43.291 | 57.449 | 15.531 |
| H | 41.971 | 57.941 | 16.085 |
| O | 37.981 | 52.835 | 21.324 |
| H | 37.124 | 52.421 | 21.418 |
| H | 38.464 | 52.255 | 20.735 |
| O | 38.562 | 52.629 | 10.685 |
| H | 38.396 | 52.702 | 9.745  |

|   |        |        |        |
|---|--------|--------|--------|
| H | 39.137 | 53.367 | 10.884 |
| O | 31.943 | 60.551 | 25.261 |
| H | 31.931 | 60.026 | 24.46  |
| H | 31.228 | 61.176 | 25.147 |
| O | 29.699 | 56.427 | 18.715 |
| H | 29.712 | 57.374 | 18.855 |
| H | 29.907 | 56.055 | 19.572 |
| O | 27.947 | 56.666 | 25.448 |
| H | 28.176 | 57.47  | 25.915 |
| H | 27.042 | 56.49  | 25.705 |
| O | 40.943 | 57.667 | 10.602 |
| H | 41.467 | 58.305 | 10.117 |
| H | 41.31  | 56.818 | 10.355 |
| O | 27.609 | 50.219 | 28.027 |
| H | 27.836 | 49.394 | 27.599 |
| H | 27.99  | 50.893 | 27.464 |
| O | 31.791 | 54.959 | 9.158  |
| H | 32.361 | 54.624 | 9.85   |
| H | 31.812 | 55.909 | 9.27   |
| O | 36.037 | 61.374 | 23.562 |
| H | 36.041 | 62.308 | 23.352 |
| H | 36.803 | 61.024 | 23.108 |
| O | 46.554 | 59.854 | 30.091 |
| H | 46.539 | 60.52  | 30.778 |
| H | 46.352 | 59.036 | 30.546 |
| O | 35.522 | 46.809 | 23.314 |
| H | 36.11  | 47.325 | 22.763 |
| H | 34.839 | 46.505 | 22.716 |
| O | 39.861 | 44.515 | 26.548 |
| H | 40.175 | 44.085 | 27.343 |
| H | 38.913 | 44.574 | 26.665 |
| O | 36.015 | 56.861 | 27.081 |
| H | 35.204 | 57.318 | 26.859 |
| H | 35.758 | 55.943 | 27.161 |
| O | 43.113 | 50.866 | 30.079 |
| H | 42.889 | 51.467 | 29.368 |
| H | 42.356 | 50.894 | 30.663 |
| O | 42.829 | 58.525 | 19.175 |
| H | 42.791 | 57.573 | 19.09  |
| H | 41.912 | 58.799 | 19.216 |
| O | 40.343 | 50.765 | 12.38  |
| H | 39.535 | 51.255 | 12.225 |
| H | 40.856 | 50.893 | 11.582 |
| O | 37.426 | 54.473 | 30.631 |
| H | 36.829 | 54.631 | 29.899 |
| H | 37.194 | 53.598 | 30.943 |
| O | 35.698 | 54.417 | 28.459 |

|   |        |        |        |
|---|--------|--------|--------|
| H | 34.841 | 54.276 | 28.861 |
| H | 35.987 | 53.543 | 28.199 |
| O | 40.176 | 46.281 | 16.776 |
| H | 40.522 | 47.102 | 16.427 |
| H | 39.507 | 46.016 | 16.145 |
| O | 33.962 | 48.404 | 15.097 |
| H | 34.898 | 48.321 | 14.915 |
| H | 33.578 | 47.596 | 14.754 |
| O | 35.622 | 49.807 | 19.263 |
| H | 35.033 | 50.295 | 18.688 |
| H | 36.003 | 49.134 | 18.699 |
| O | 41.375 | 61.96  | 17.912 |
| H | 41.193 | 62.77  | 17.435 |
| H | 42.273 | 61.735 | 17.667 |
| O | 31.958 | 50.758 | 23.995 |
| H | 31.348 | 50.044 | 24.178 |
| H | 31.623 | 51.496 | 24.505 |
| O | 48.276 | 58.62  | 10.133 |
| H | 47.728 | 59.399 | 10.034 |
| H | 47.653 | 57.905 | 10.264 |
| O | 41.575 | 48.05  | 15.186 |
| H | 41.111 | 48.74  | 14.71  |
| H | 42.164 | 47.666 | 14.536 |
| O | 40.791 | 59.356 | 15.802 |
| H | 40.133 | 59.718 | 16.395 |
| H | 41.26  | 60.12  | 15.468 |
| O | 29.895 | 63.88  | 20.111 |
| H | 30.841 | 63.88  | 19.964 |
| H | 29.793 | 64.19  | 21.011 |
| O | 45.775 | 56.55  | 31.098 |
| H | 45.106 | 57.109 | 31.493 |
| H | 45.28  | 55.899 | 30.6   |
| O | 30.977 | 48.865 | 26.312 |
| H | 30.13  | 48.428 | 26.219 |
| H | 30.888 | 49.395 | 27.104 |
| O | 44.256 | 46.243 | 25.317 |
| H | 43.605 | 46.943 | 25.255 |
| H | 44.862 | 46.415 | 24.596 |
| O | 28.472 | 46.373 | 13.138 |
| H | 28.341 | 45.725 | 12.446 |
| H | 27.8   | 47.036 | 12.975 |
| O | 45.989 | 51.14  | 15.136 |
| H | 45.203 | 50.858 | 14.667 |
| H | 45.75  | 51.08  | 16.061 |
| O | 49.971 | 53.203 | 25.383 |
| H | 49.09  | 52.921 | 25.629 |
| H | 50.323 | 52.472 | 24.875 |

|   |        |        |        |
|---|--------|--------|--------|
| O | 33.542 | 43.597 | 15.584 |
| H | 33.013 | 43.549 | 14.788 |
| H | 34.388 | 43.934 | 15.29  |
| O | 31.222 | 44.138 | 13.733 |
| H | 30.606 | 43.932 | 14.435 |
| H | 30.673 | 44.465 | 13.02  |
| O | 44.259 | 55.332 | 25.396 |
| H | 43.496 | 54.761 | 25.305 |
| H | 44.917 | 54.945 | 24.818 |
| O | 28.838 | 47.744 | 20.244 |
| H | 28.869 | 47.442 | 21.151 |
| H | 28.747 | 48.695 | 20.311 |
| O | 55.84  | 54.176 | 22.297 |
| H | 56.313 | 54.86  | 22.77  |
| H | 55.411 | 54.636 | 21.576 |
| O | 33.234 | 59.363 | 21.263 |
| H | 32.521 | 59.638 | 21.84  |
| H | 33.987 | 59.26  | 21.845 |
| O | 50.584 | 46.959 | 5.661  |
| H | 50.313 | 46.847 | 6.572  |
| H | 50.889 | 47.865 | 5.612  |
| O | 45.983 | 54.038 | 13.974 |
| H | 45.035 | 53.971 | 14.088 |
| H | 46.341 | 53.354 | 14.541 |
| O | 47.118 | 56.236 | 36.319 |
| H | 47.773 | 56.9   | 36.533 |
| H | 46.279 | 56.664 | 36.49  |
| O | 45.312 | 50.647 | 18.044 |
| H | 44.843 | 51.091 | 18.751 |
| H | 45.309 | 49.724 | 18.297 |
| O | 42.956 | 43.861 | 24.807 |
| H | 43.426 | 44.689 | 24.902 |
| H | 43.622 | 43.239 | 24.514 |
| O | 45.991 | 50.456 | 22.77  |
| H | 45.205 | 50.351 | 23.306 |
| H | 46.112 | 51.403 | 22.703 |
| O | 44.363 | 43.064 | 27.403 |
| H | 45.27  | 43.247 | 27.157 |
| H | 43.891 | 43.031 | 26.57  |
| O | 37.881 | 58.45  | 21.679 |
| H | 38.123 | 59.257 | 22.134 |
| H | 37.084 | 58.156 | 22.12  |
| O | 51.835 | 49.599 | 20.864 |
| H | 51.605 | 48.673 | 20.788 |
| H | 51.687 | 49.955 | 19.988 |
| O | 20.96  | 47.138 | 22.361 |
| H | 20.747 | 46.395 | 21.797 |



|   |        |        |        |
|---|--------|--------|--------|
| H | 20.222 | 47.197 | 22.969 |
| O | 42.212 | 57.755 | 23.797 |
| H | 41.855 | 58.571 | 24.148 |
| H | 42.694 | 57.371 | 24.529 |
| O | 40.056 | 56.422 | 22.155 |
| H | 40.772 | 57.037 | 22.314 |
| H | 39.319 | 56.975 | 21.895 |
| O | 36.594 | 47.801 | 15.073 |
| H | 36.957 | 48.648 | 15.329 |
| H | 37.3   | 47.374 | 14.588 |
| O | 33.293 | 50.871 | 18.16  |
| H | 32.4   | 51.073 | 18.438 |
| H | 33.333 | 49.915 | 18.159 |
| O | 31.833 | 47.294 | 19.626 |
| H | 31.501 | 47.817 | 20.355 |
| H | 32.213 | 47.934 | 19.025 |
| O | 40.496 | 50.972 | 23.435 |
| H | 40.093 | 50.144 | 23.172 |
| H | 39.789 | 51.458 | 23.859 |
| O | 50.878 | 46.994 | 21.059 |
| H | 51.335 | 46.424 | 21.677 |
| H | 50.825 | 46.481 | 20.253 |
| O | 43.017 | 56.942 | 5.237  |
| H | 43.868 | 56.829 | 5.659  |
| H | 43.042 | 56.352 | 4.484  |
| O | 44.943 | 56.626 | -3.53  |
| H | 44.514 | 56.032 | -2.914 |
| H | 44.363 | 56.639 | -4.292 |
| O | 28.895 | 52.561 | 7.143  |
| H | 28.486 | 51.708 | 7.286  |
| H | 28.377 | 52.961 | 6.445  |
| O | 30.553 | 49.674 | 13.584 |
| H | 30.53  | 49.017 | 14.28  |
| H | 31.166 | 50.338 | 13.901 |
| O | 29.91  | 50.434 | 10.093 |
| H | 29.215 | 50.581 | 9.452  |
| H | 30.231 | 51.311 | 10.305 |
| O | 37.342 | 54.294 | -2.138 |
| H | 36.809 | 55.072 | -1.974 |
| H | 37.647 | 54.026 | -1.271 |
| O | 36.821 | 44.026 | -0.672 |
| H | 37.658 | 43.601 | -0.862 |
| H | 37.001 | 44.58  | 0.087  |
| O | 27.267 | 45.093 | 2.574  |
| H | 27.664 | 44.857 | 3.412  |
| H | 28.011 | 45.248 | 1.992  |
| O | 50.23  | 55.132 | 4.445  |

|   |        |        |        |
|---|--------|--------|--------|
| H | 50.018 | 54.492 | 3.766  |
| H | 49.524 | 55.777 | 4.394  |
| O | 39.168 | 46.005 | 8.302  |
| H | 39.797 | 45.288 | 8.378  |
| H | 38.351 | 45.645 | 8.647  |
| O | 47.909 | 50.129 | 0.618  |
| H | 47.722 | 51.051 | 0.793  |
| H | 47.407 | 49.928 | -0.171 |
| O | 38.823 | 56.617 | 3.845  |
| H | 39.65  | 56.29  | 3.49   |
| H | 38.172 | 55.972 | 3.569  |
| O | 47.355 | 49.608 | 5.037  |
| H | 47.917 | 50.359 | 4.846  |
| H | 47.51  | 49.002 | 4.313  |
| O | 29.741 | 49.517 | -0.239 |
| H | 29.465 | 49.413 | 0.671  |
| H | 30.475 | 50.13  | -0.199 |
| O | 43.287 | 58.02  | -0.225 |
| H | 42.415 | 58.273 | -0.527 |
| H | 43.293 | 58.245 | 0.706  |
| O | 47.863 | 60.44  | 6.471  |
| H | 47.314 | 59.68  | 6.276  |
| H | 47.241 | 61.137 | 6.678  |
| O | 41.886 | 54.408 | 6.873  |
| H | 42.062 | 54.257 | 5.944  |
| H | 42.432 | 53.767 | 7.328  |
| O | 38.419 | 59.227 | 3.676  |
| H | 38.385 | 59.468 | 2.75   |
| H | 38.372 | 58.271 | 3.678  |
| O | 29.447 | 49.609 | 2.583  |
| H | 28.773 | 49.227 | 3.145  |
| H | 30.051 | 50.038 | 3.19   |
| O | 35.084 | 55.742 | 14.689 |
| H | 35.547 | 55.846 | 13.858 |
| H | 34.838 | 56.633 | 14.939 |
| O | 29.329 | 53.728 | 1.153  |
| H | 30.233 | 53.91  | 0.894  |
| H | 28.941 | 54.592 | 1.289  |
| O | 42.45  | 55.633 | 9.282  |
| H | 42.362 | 55.187 | 8.44   |
| H | 42.962 | 56.418 | 9.085  |
| O | 36.855 | 62.073 | 3.194  |
| H | 37.151 | 61.172 | 3.327  |
| H | 36.726 | 62.145 | 2.248  |
| O | 34.444 | 51.064 | 9.432  |
| H | 34.929 | 51.859 | 9.211  |
| H | 34.361 | 51.091 | 10.385 |

|   |        |        |        |
|---|--------|--------|--------|
| O | 43.655 | 54.63  | -2.142 |
| H | 42.732 | 54.854 | -2.024 |
| H | 43.839 | 53.999 | -1.446 |
| O | 36.795 | 50.698 | 11.774 |
| H | 35.934 | 51.113 | 11.826 |
| H | 37.31  | 51.283 | 11.219 |
| O | 34.467 | 52.198 | 4.446  |
| H | 35.079 | 51.668 | 4.956  |
| H | 34.415 | 53.028 | 4.92   |
| O | 31.515 | 56.517 | 13.745 |
| H | 30.77  | 57.116 | 13.782 |
| H | 32.056 | 56.851 | 13.03  |
| O | 30.168 | 52.109 | 4.065  |
| H | 30.184 | 51.372 | 4.675  |
| H | 29.404 | 52.621 | 4.329  |
| O | 37.187 | 47.508 | 12.071 |
| H | 38.041 | 47.667 | 12.473 |
| H | 36.759 | 48.364 | 12.071 |
| O | 28.726 | 47.989 | 5.598  |
| H | 27.927 | 47.924 | 6.121  |
| H | 29.126 | 47.122 | 5.662  |
| O | 35.378 | 49.899 | 5.806  |
| H | 34.626 | 50.211 | 6.309  |
| H | 35.236 | 48.957 | 5.721  |
| O | 42.729 | 51.045 | 7.628  |
| H | 43.264 | 51.742 | 7.248  |
| H | 42.661 | 50.389 | 6.934  |
| O | 38.05  | 51.508 | 5.139  |
| H | 37.294 | 51.398 | 5.715  |
| H | 38.637 | 50.79  | 5.375  |
| O | 44.462 | 52.927 | 6.617  |
| H | 45.262 | 53.208 | 7.063  |
| H | 44.771 | 52.494 | 5.822  |
| O | 44.435 | 50.694 | 11.172 |
| H | 44.69  | 50.03  | 10.531 |
| H | 45.18  | 51.293 | 11.206 |
| O | 34.34  | 54.076 | 6.357  |
| H | 34.83  | 54.028 | 7.178  |
| H | 33.478 | 53.72  | 6.572  |
| O | 33.59  | 57.83  | 11.794 |
| H | 33.621 | 58.492 | 11.103 |
| H | 33.903 | 58.285 | 12.575 |
| O | 43.441 | 58.299 | 11.951 |
| H | 42.486 | 58.3   | 11.888 |
| H | 43.737 | 57.979 | 11.098 |
| O | 37.619 | 56.961 | 18.207 |
| H | 36.931 | 56.435 | 18.614 |

|   |        |        |        |
|---|--------|--------|--------|
| H | 38.215 | 57.172 | 18.926 |
| O | 35.216 | 52.897 | 1.112  |
| H | 36.142 | 52.66  | 1.152  |
| H | 34.763 | 52.17  | 1.541  |
| O | 34.071 | 61.701 | 13.577 |
| H | 33.756 | 61.573 | 14.472 |
| H | 33.498 | 61.153 | 13.04  |
| O | 34.574 | 58.415 | 16.881 |
| H | 35.441 | 58.361 | 17.281 |
| H | 33.988 | 58.014 | 17.524 |
| O | 45.928 | 66.458 | 4.133  |
| H | 45.595 | 66.01  | 3.356  |
| H | 45.143 | 66.771 | 4.584  |
| O | 31.201 | 40.447 | 5.124  |
| H | 31.068 | 40.783 | 4.238  |
| H | 30.982 | 39.517 | 5.063  |
| O | 41.103 | 56.461 | 2.256  |
| H | 41.7   | 57.148 | 1.96   |
| H | 41.634 | 55.914 | 2.833  |
| O | 32.188 | 52.408 | 2.447  |
| H | 32.95  | 52.502 | 3.018  |
| H | 31.441 | 52.623 | 3.006  |
| O | 51.207 | 50.484 | 13.202 |
| H | 50.322 | 50.583 | 13.555 |
| H | 51.673 | 51.263 | 13.506 |
| O | 45.545 | 54.002 | 2.535  |
| H | 45.596 | 53.35  | 3.235  |
| H | 45.792 | 53.523 | 1.744  |
| O | 24.798 | 52.738 | 6.691  |
| H | 24.63  | 53.68  | 6.665  |
| H | 25.74  | 52.668 | 6.846  |
| O | 35.793 | 53.495 | 8.693  |
| H | 36.413 | 52.812 | 8.437  |
| H | 36.322 | 54.292 | 8.743  |
| O | 31.567 | 53.349 | 11.897 |
| H | 30.878 | 53.696 | 12.464 |
| H | 32.193 | 54.069 | 11.814 |
| O | 29.581 | 58.139 | 7.812  |
| H | 30.167 | 57.937 | 7.083  |
| H | 29.051 | 58.872 | 7.497  |
| O | 42.008 | 53.896 | 11.189 |
| H | 42.077 | 54.627 | 10.575 |
| H | 41.728 | 53.156 | 10.649 |
| O | 44.748 | 48.48  | 9.497  |
| H | 45.55  | 47.988 | 9.672  |
| H | 44.833 | 48.76  | 8.586  |
| O | 33.85  | 51.367 | 12.061 |

|   |        |        |        |
|---|--------|--------|--------|
| H | 34.132 | 51.785 | 12.874 |
| H | 33.049 | 51.832 | 11.818 |
| O | 36.996 | 44.555 | 9.17   |
| H | 36.713 | 44.598 | 10.084 |
| H | 36.46  | 43.86  | 8.786  |
| O | 33.685 | 55.41  | -5.751 |
| H | 33.269 | 55.89  | -5.035 |
| H | 34.365 | 54.887 | -5.325 |
| O | 39.641 | 50.417 | 7.104  |
| H | 39.404 | 50.091 | 7.972  |
| H | 40.59  | 50.54  | 7.144  |
| O | 31.656 | 63.619 | 3.706  |
| H | 31.159 | 64.026 | 4.416  |
| H | 31.798 | 64.327 | 3.077  |
| O | 35.727 | 55.917 | 19.597 |
| H | 34.917 | 56.423 | 19.532 |
| H | 35.454 | 55.01  | 19.453 |
| O | 47.053 | 46.676 | 13.739 |
| H | 47.732 | 46.67  | 13.064 |
| H | 47.332 | 47.354 | 14.354 |
| O | 31.363 | 58.184 | 1.112  |
| H | 31.955 | 58.462 | 1.811  |
| H | 31.292 | 57.236 | 1.222  |
| O | 32.7   | 55.793 | 4.056  |
| H | 33.225 | 55.29  | 4.679  |
| H | 32.854 | 55.366 | 3.214  |
| O | 39.08  | 54.328 | 8.586  |
| H | 39.901 | 54.493 | 8.121  |
| H | 38.568 | 55.127 | 8.459  |
| O | 32.627 | 55.181 | 1.438  |
| H | 33.241 | 55.374 | 0.729  |
| H | 32.576 | 54.226 | 1.459  |
| O | 49.543 | 53.804 | 14.997 |
| H | 49.814 | 53.564 | 15.883 |
| H | 50.319 | 54.209 | 14.61  |
| O | 50.736 | 56.433 | 1.568  |
| H | 51.209 | 56.91  | 2.25   |
| H | 49.861 | 56.822 | 1.568  |
| O | 47.888 | 51.605 | 8.817  |
| H | 47.419 | 51.772 | 9.635  |
| H | 47.792 | 50.664 | 8.673  |
| O | 32.087 | 47.545 | 3.626  |
| H | 32.194 | 48.48  | 3.803  |
| H | 32.015 | 47.489 | 2.673  |
| O | 44.013 | 43.358 | 2.429  |
| H | 44.892 | 43.736 | 2.409  |
| H | 43.471 | 43.984 | 1.948  |

|   |        |        |        |
|---|--------|--------|--------|
| O | 47.741 | 55.494 | 12.604 |
| H | 48.361 | 55.842 | 13.246 |
| H | 47.049 | 55.096 | 13.131 |
| O | 27.692 | 50.21  | 8.271  |
| H | 27.322 | 49.465 | 7.797  |
| H | 26.956 | 50.568 | 8.767  |
| O | 36.031 | 48.671 | 9.059  |
| H | 35.669 | 47.955 | 9.581  |
| H | 35.486 | 49.426 | 9.278  |
| O | 51.764 | 52.44  | 10.715 |
| H | 51.05  | 53.032 | 10.95  |
| H | 51.371 | 51.567 | 10.747 |
| O | 41.297 | 47.539 | 7.389  |
| H | 41.582 | 46.74  | 7.832  |
| H | 40.364 | 47.402 | 7.225  |
| O | 44.58  | 57.506 | 8.867  |
| H | 44.933 | 57.341 | 7.993  |
| H | 45.291 | 57.266 | 9.462  |
| O | 45.089 | 50.101 | 2.115  |
| H | 45.751 | 49.692 | 1.558  |
| H | 44.455 | 49.404 | 2.285  |
| O | 34.519 | 47.47  | 5.546  |
| H | 34.553 | 46.732 | 6.155  |
| H | 33.976 | 47.157 | 4.822  |
| O | 41.894 | 52.013 | 3.815  |
| H | 42.786 | 51.696 | 3.671  |
| H | 41.346 | 51.441 | 3.278  |
| O | 53.941 | 48.202 | 3.534  |
| H | 53.81  | 49.057 | 3.944  |
| H | 53.138 | 48.049 | 3.037  |
| O | 43.476 | 46.3   | 4.844  |
| H | 44.348 | 46.05  | 4.538  |
| H | 43.435 | 45.974 | 5.743  |
| O | 40.385 | 38.987 | 15.746 |
| H | 39.83  | 38.608 | 16.428 |
| H | 41.098 | 39.409 | 16.225 |
| O | 39.572 | 41.425 | 14.59  |
| H | 40.395 | 41.628 | 14.146 |
| H | 39.67  | 40.516 | 14.872 |
| O | 38.139 | 35.301 | 53.943 |
| H | 38.673 | 36.089 | 54.041 |
| H | 37.56  | 35.494 | 53.206 |
| O | 43.694 | 39.758 | 59.785 |
| H | 43.821 | 39.665 | 60.73  |
| H | 44.13  | 40.58  | 59.565 |
| O | 32.787 | 42.396 | 59.072 |
| H | 31.872 | 42.125 | 59.001 |

|   |        |        |        |
|---|--------|--------|--------|
| H | 32.781 | 43.089 | 59.732 |
| O | 38.497 | 41.447 | 53.711 |
| H | 38.15  | 41.448 | 54.603 |
| H | 38.453 | 40.53  | 53.438 |
| O | 34.287 | 40.143 | 55.585 |
| H | 33.399 | 39.935 | 55.293 |
| H | 34.209 | 41.006 | 55.993 |
| O | 31.597 | 37.421 | 54.224 |
| H | 31.199 | 36.988 | 54.979 |
| H | 30.896 | 37.965 | 53.863 |
| O | 28.408 | 37.912 | 62.166 |
| H | 27.914 | 38.537 | 62.698 |
| H | 29.061 | 37.551 | 62.765 |
| O | 41.549 | 41.845 | 62.704 |
| H | 42.093 | 41.074 | 62.542 |
| H | 41.665 | 42.388 | 61.924 |
| O | 40.939 | 39.176 | 58.977 |
| H | 41.179 | 38.286 | 59.236 |
| H | 41.679 | 39.715 | 59.256 |
| O | 41.694 | 33.384 | 52.049 |
| H | 41.571 | 33.127 | 52.963 |
| H | 41.681 | 32.559 | 51.564 |
| O | 33.379 | 33.662 | 49.793 |
| H | 33.465 | 32.709 | 49.813 |
| H | 33.171 | 33.902 | 50.696 |
| O | 39.926 | 35.369 | 58.396 |
| H | 39.702 | 36.158 | 57.902 |
| H | 40.57  | 35.665 | 59.04  |
| O | 26.928 | 31.138 | 61.798 |
| H | 27.849 | 30.882 | 61.845 |
| H | 26.749 | 31.217 | 60.861 |
| O | 33.177 | 41.665 | 48.565 |
| H | 33.282 | 42.261 | 47.824 |
| H | 32.308 | 41.866 | 48.913 |
| O | 51.209 | 45.648 | 51.463 |
| H | 50.529 | 45.499 | 50.805 |
| H | 51.914 | 46.085 | 50.984 |
| O | 48.374 | 31.685 | 58.154 |
| H | 48.969 | 31.601 | 57.409 |
| H | 48.806 | 32.309 | 58.736 |
| O | 24.305 | 40.584 | 46.214 |
| H | 24.231 | 41.524 | 46.383 |
| H | 24.065 | 40.488 | 45.292 |
| O | 48.158 | 42.348 | 57.049 |
| H | 47.54  | 41.633 | 56.899 |
| H | 47.605 | 43.12  | 57.175 |
| O | 44.282 | 31.471 | 60.684 |

|   |        |        |        |
|---|--------|--------|--------|
| H | 44.363 | 30.967 | 59.874 |
| H | 44.13  | 32.37  | 60.392 |
| O | 36.74  | 29.59  | 64.861 |
| H | 37.551 | 29.188 | 64.548 |
| H | 36.106 | 28.872 | 64.871 |
| O | 41.476 | 47.838 | 48.885 |
| H | 41.505 | 46.907 | 49.103 |
| H | 40.55  | 48.018 | 48.724 |
| O | 49.482 | 37.893 | 54.601 |
| H | 49.6   | 37.915 | 55.55  |
| H | 49.635 | 36.979 | 54.362 |
| O | 43.74  | 41.257 | 41.699 |
| H | 43.459 | 42.172 | 41.675 |
| H | 43.388 | 40.878 | 40.894 |
| O | 39.04  | 31.944 | 52.423 |
| H | 38.472 | 31.431 | 52.998 |
| H | 39.63  | 32.407 | 53.018 |
| O | 40.676 | 40.905 | 56.596 |
| H | 40.856 | 40.228 | 57.249 |
| H | 41.541 | 41.201 | 56.314 |
| O | 36.997 | 38.89  | 54.768 |
| H | 36.336 | 38.499 | 54.197 |
| H | 36.666 | 39.769 | 54.95  |
| O | 39.1   | 42.93  | 58.035 |
| H | 39.871 | 42.415 | 57.796 |
| H | 38.933 | 43.479 | 57.269 |
| O | 37.653 | 31.772 | 46.31  |
| H | 38.298 | 32.231 | 45.772 |
| H | 38.177 | 31.273 | 46.937 |
| O | 36.075 | 35.052 | 52.285 |
| H | 35.754 | 35.916 | 52.545 |
| H | 35.283 | 34.547 | 52.105 |
| O | 50.365 | 35.12  | 54.446 |
| H | 50.257 | 34.22  | 54.137 |
| H | 49.485 | 35.391 | 54.707 |
| O | 30.387 | 38.506 | 50.736 |
| H | 29.819 | 37.948 | 50.205 |
| H | 29.784 | 39.074 | 51.216 |
| O | 33.575 | 39.506 | 59.305 |
| H | 34.405 | 39.163 | 58.974 |
| H | 33.594 | 40.437 | 59.084 |
| O | 30.079 | 47.632 | 57.193 |
| H | 30.067 | 48.146 | 58.001 |
| H | 30.464 | 48.217 | 56.542 |
| O | 40.408 | 38.302 | 45.385 |
| H | 40.895 | 39.116 | 45.513 |
| H | 40.202 | 38.003 | 46.271 |



|   |        |        |        |
|---|--------|--------|--------|
| O | 43.549 | 41.729 | 56.165 |
| H | 44.262 | 41.092 | 56.213 |
| H | 43.468 | 41.928 | 55.232 |
| O | 34.633 | 43.425 | 52.38  |
| H | 34.456 | 43.895 | 53.195 |
| H | 34.054 | 42.663 | 52.412 |
| O | 43.935 | 48.765 | 54.725 |
| H | 44.073 | 49.263 | 55.53  |
| H | 43.923 | 49.426 | 54.033 |
| O | 22.975 | 26.677 | 51.638 |
| H | 23.754 | 27.219 | 51.765 |
| H | 22.425 | 26.867 | 52.398 |
| O | 42.832 | 29.995 | 55.098 |
| H | 43.594 | 29.546 | 54.733 |
| H | 43.128 | 30.894 | 55.241 |
| O | 31.502 | 38.358 | 58.302 |
| H | 30.843 | 39.032 | 58.135 |
| H | 32.143 | 38.785 | 58.87  |
| O | 35.143 | 32.545 | 60.15  |
| H | 35.907 | 32.81  | 60.662 |
| H | 34.88  | 33.339 | 59.684 |
| O | 36.932 | 32.81  | 54.606 |
| H | 36.339 | 33.112 | 55.294 |
| H | 37.424 | 33.592 | 54.354 |
| O | 41.072 | 39.722 | 53.597 |
| H | 41.795 | 39.318 | 54.077 |
| H | 40.99  | 40.596 | 53.978 |
| O | 34.354 | 36.505 | 55.843 |
| H | 34.624 | 35.628 | 56.116 |
| H | 33.398 | 36.483 | 55.879 |
| O | 35.473 | 34.051 | 56.601 |
| H | 34.791 | 33.392 | 56.73  |
| H | 36.146 | 33.827 | 57.244 |
| O | 34.795 | 36.358 | 61.977 |
| H | 35.354 | 35.923 | 62.621 |
| H | 35.039 | 35.961 | 61.141 |
| O | 35.12  | 37.422 | 53.313 |
| H | 34.784 | 37.113 | 54.154 |
| H | 34.338 | 37.558 | 52.778 |
| O | 40.511 | 29.02  | 51.246 |
| H | 40.771 | 28.128 | 51.015 |
| H | 40.64  | 29.07  | 52.193 |
| O | 45.804 | 27.517 | 66.538 |
| H | 46.449 | 27.618 | 67.238 |
| H | 46.248 | 27.842 | 65.755 |
| O | 38.12  | 38.221 | 43.843 |
| H | 38.244 | 37.612 | 43.115 |

|   |        |        |        |
|---|--------|--------|--------|
| H | 38.931 | 38.158 | 44.348 |
| O | 27.599 | 31.113 | 52.477 |
| H | 27.416 | 30.177 | 52.569 |
| H | 27.015 | 31.534 | 53.108 |
| O | 33.9   | 40.534 | 51.14  |
| H | 33.485 | 40.488 | 50.278 |
| H | 33.509 | 39.814 | 51.633 |
| O | 46.07  | 44.574 | 52.248 |
| H | 46.476 | 43.707 | 52.246 |
| H | 46.249 | 44.925 | 51.375 |
| O | 43.389 | 32.609 | 55.497 |
| H | 43.167 | 33.407 | 55.977 |
| H | 44.241 | 32.796 | 55.102 |
| O | 40.218 | 36.034 | 51.623 |
| H | 40.226 | 36.504 | 52.457 |
| H | 40.57  | 35.169 | 51.833 |
| O | 37.873 | 39.295 | 58.508 |
| H | 37.068 | 38.889 | 58.187 |
| H | 38.519 | 38.589 | 58.497 |
| O | 36.83  | 38.873 | 51.572 |
| H | 36.56  | 39.629 | 52.093 |
| H | 36.274 | 38.158 | 51.883 |
| O | 43.769 | 35.412 | 45.103 |
| H | 42.965 | 35.153 | 44.653 |
| H | 43.532 | 35.418 | 46.031 |
| O | 54.416 | 41.28  | 52.985 |
| H | 53.706 | 41.071 | 53.592 |
| H | 53.981 | 41.405 | 52.142 |
| O | 43.196 | 42.198 | 53.524 |
| H | 43.312 | 42.29  | 52.578 |
| H | 42.278 | 42.422 | 53.676 |
| O | 38.367 | 44.183 | 55.674 |
| H | 38.669 | 44.931 | 55.159 |
| H | 37.473 | 44.028 | 55.371 |
| O | 35.697 | 38.676 | 45.368 |
| H | 35.913 | 38.711 | 46.3   |
| H | 36.524 | 38.46  | 44.939 |
| O | 32.014 | 42.718 | 53.119 |
| H | 32.009 | 41.878 | 53.579 |
| H | 31.249 | 42.681 | 52.545 |
| O | 32.918 | 34.702 | 52.515 |
| H | 32.09  | 35.011 | 52.883 |
| H | 33.006 | 33.807 | 52.842 |
| O | 37.164 | 43.1   | 51.71  |
| H | 37.608 | 42.31  | 52.02  |
| H | 36.285 | 43.042 | 52.083 |
| O | 49.76  | 41.97  | 50.355 |

|   |        |        |        |
|---|--------|--------|--------|
| H | 49.834 | 41.119 | 49.924 |
| H | 48.875 | 42.268 | 50.146 |
| O | 36.092 | 51.815 | 49.651 |
| H | 35.16  | 52.025 | 49.702 |
| H | 36.13  | 51.016 | 49.126 |
| O | 47.312 | 48.113 | 49.481 |
| H | 46.778 | 47.724 | 50.174 |
| H | 46.866 | 47.869 | 48.67  |
| O | 43.152 | 39.862 | 47.861 |
| H | 42.34  | 39.966 | 47.365 |
| H | 43.035 | 39.043 | 48.343 |
| O | 30.56  | 42.405 | 48.732 |
| H | 30.644 | 43.283 | 48.359 |
| H | 29.966 | 41.948 | 48.137 |
| O | 39.307 | 37.687 | 53.973 |
| H | 38.596 | 38.186 | 54.375 |
| H | 39.957 | 38.347 | 53.733 |
| O | 40.971 | 42.444 | 48.496 |
| H | 40.111 | 42.368 | 48.908 |
| H | 40.913 | 41.893 | 47.716 |
| O | 32.685 | 38.276 | 51.916 |
| H | 32.252 | 38.233 | 52.768 |
| H | 31.972 | 38.206 | 51.281 |
| O | 45.547 | 27.052 | 58.704 |
| H | 46.3   | 26.463 | 58.763 |
| H | 45.883 | 27.9   | 58.995 |
| O | 34.596 | 48.375 | 52.83  |
| H | 34.769 | 47.944 | 51.993 |
| H | 35.088 | 49.195 | 52.783 |
| O | 33.521 | 32.655 | 53.927 |
| H | 33.802 | 31.938 | 53.36  |
| H | 33.328 | 32.235 | 54.766 |
| O | 42.991 | 37.619 | 62.877 |
| H | 43.313 | 38.394 | 63.337 |
| H | 42.159 | 37.415 | 63.304 |
| O | 32.623 | 47.093 | 47.87  |
| H | 32.875 | 47.153 | 48.791 |
| H | 32.459 | 47.999 | 47.607 |
| O | 37.122 | 35.446 | 48.066 |
| H | 37.504 | 34.865 | 48.723 |
| H | 36.518 | 36.001 | 48.56  |
| O | 46.533 | 47.176 | 52.034 |
| H | 46.299 | 46.254 | 52.139 |
| H | 46.233 | 47.593 | 52.842 |
| O | 37.374 | 48.013 | 63.019 |
| H | 38.153 | 48.254 | 62.517 |
| H | 37.701 | 47.852 | 63.904 |

|   |        |        |        |
|---|--------|--------|--------|
| O | 32.263 | 35.509 | 57.939 |
| H | 32.041 | 36.425 | 58.104 |
| H | 31.473 | 35.139 | 57.544 |
| O | 34.396 | 44.443 | 50.079 |
| H | 33.893 | 43.834 | 49.539 |
| H | 34.448 | 44.017 | 50.935 |
| O | 41.405 | 47.653 | 54.538 |
| H | 42.184 | 48.154 | 54.781 |
| H | 41.722 | 47.01  | 53.905 |
| O | 35.789 | 38.194 | 48.063 |
| H | 35.798 | 39.076 | 48.435 |
| H | 35.618 | 37.621 | 48.81  |
| O | 40.714 | 45.456 | 46.882 |
| H | 40.465 | 44.585 | 46.574 |
| H | 41.115 | 45.301 | 47.738 |
| O | 38.115 | 34.371 | 50.473 |
| H | 38.835 | 34.859 | 50.874 |
| H | 37.406 | 34.419 | 51.114 |
| O | 39.981 | 45.766 | 43.535 |
| H | 39.129 | 45.516 | 43.894 |
| H | 40.131 | 46.651 | 43.869 |
| O | 34.431 | 42.857 | 46.527 |
| H | 34.531 | 42.133 | 45.909 |
| H | 35.319 | 43.195 | 46.646 |
| O | 47.538 | 29.097 | 50.928 |
| H | 46.593 | 29.233 | 50.995 |
| H | 47.894 | 29.967 | 50.749 |
| O | 39.143 | 35.025 | 46.382 |
| H | 38.329 | 35.206 | 46.852 |
| H | 39.834 | 35.238 | 47.008 |
| O | 44.632 | 29.522 | 50.975 |
| H | 44.069 | 30.075 | 50.433 |
| H | 44.082 | 29.279 | 51.72  |
| O | 37.644 | 46.12  | 60.137 |
| H | 38.29  | 45.438 | 60.32  |
| H | 37.028 | 46.069 | 60.868 |
| O | 39.825 | 51.512 | 49.989 |
| H | 39.229 | 52.128 | 50.415 |
| H | 40.311 | 51.111 | 50.71  |
| O | 34.808 | 47.157 | 50.273 |
| H | 33.947 | 47.573 | 50.23  |
| H | 34.635 | 46.231 | 50.103 |
| O | 32.362 | 44.929 | 55.035 |
| H | 31.627 | 44.437 | 54.67  |
| H | 32.691 | 45.448 | 54.301 |
| O | 52.137 | 35.633 | 48.642 |
| H | 52.052 | 35.803 | 47.704 |

|   |        |        |        |
|---|--------|--------|--------|
| H | 51.726 | 34.777 | 48.768 |
| O | 61.111 | 41.708 | 56.276 |
| H | 61.352 | 42.503 | 56.752 |
| H | 60.92  | 42.01  | 55.388 |
| O | 27.188 | 29.119 | 55.137 |
| H | 27.091 | 28.554 | 55.903 |
| H | 27.348 | 29.99  | 55.5   |
| O | 56.279 | 36.882 | 59.984 |
| H | 56.912 | 37.024 | 59.279 |
| H | 55.438 | 36.794 | 59.536 |
| O | 45.497 | 37.844 | 52.08  |
| H | 45.096 | 38.344 | 51.37  |
| H | 45.203 | 36.945 | 51.936 |
| O | 41.85  | 34.071 | 43.799 |
| H | 41.749 | 33.177 | 44.127 |
| H | 40.965 | 34.435 | 43.822 |
| O | 44.455 | 35.539 | 50.551 |
| H | 45.349 | 35.551 | 50.21  |
| H | 44.067 | 34.747 | 50.18  |
| O | 26.997 | 39.931 | 45.473 |
| H | 27.187 | 39.002 | 45.344 |
| H | 26.041 | 39.985 | 45.452 |
| O | 43.293 | 38.133 | 54.104 |
| H | 42.913 | 37.309 | 53.8   |
| H | 44.229 | 38.047 | 53.922 |
| O | 34.705 | 36.553 | 49.831 |
| H | 34.128 | 35.888 | 49.455 |
| H | 34.199 | 36.93  | 50.551 |
| O | 33.069 | 30.668 | 50.154 |
| H | 34.011 | 30.654 | 50.328 |
| H | 33     | 30.928 | 49.236 |
| O | 40.5   | 33.654 | 54.439 |
| H | 40.835 | 33.238 | 55.234 |
| H | 39.63  | 33.969 | 54.683 |
| O | 23.765 | 36.516 | 59.927 |
| H | 22.89  | 36.602 | 60.304 |
| H | 24.326 | 37.041 | 60.499 |
| O | 46.902 | 36.088 | 56.304 |
| H | 46.179 | 35.875 | 56.894 |
| H | 46.682 | 36.953 | 55.957 |
| O | 45.621 | 31.97  | 48.328 |
| H | 45.484 | 32.549 | 47.578 |
| H | 46.569 | 31.839 | 48.359 |
| O | 44.738 | 39.884 | 50.186 |
| H | 44.383 | 40.165 | 49.343 |
| H | 44.631 | 40.646 | 50.757 |
| O | 41.113 | 48.061 | 59.019 |

|   |        |        |        |
|---|--------|--------|--------|
| H | 40.813 | 48.193 | 59.919 |
| H | 41.992 | 47.695 | 59.111 |
| O | 45.847 | 46.773 | 55.089 |
| H | 45.141 | 47.407 | 55.215 |
| H | 45.401 | 45.962 | 54.847 |
| O | 35.494 | 40.695 | 53.255 |
| H | 34.882 | 40.862 | 52.537 |
| H | 34.933 | 40.531 | 54.013 |
| O | 35.456 | 46.069 | 57.209 |
| H | 35.986 | 45.398 | 57.64  |
| H | 35.327 | 45.737 | 56.32  |
| O | 31.461 | 29.192 | 51.955 |
| H | 31.772 | 29.926 | 51.424 |
| H | 31.614 | 29.469 | 52.858 |
| O | 42.968 | 35     | 56.649 |
| H | 43.235 | 35.565 | 57.374 |
| H | 42.345 | 35.529 | 56.15  |
| O | 44.929 | 28.093 | 53.751 |
| H | 45.614 | 27.944 | 54.403 |
| H | 45.115 | 27.458 | 53.06  |
| O | 41.366 | 45.434 | 56.602 |
| H | 41.387 | 46.039 | 55.861 |
| H | 40.604 | 45.707 | 57.113 |
| O | 33.733 | 31.205 | 47.512 |
| H | 33.451 | 31.206 | 46.598 |
| H | 34.613 | 31.581 | 47.492 |
| O | 37.894 | 30.402 | 54.444 |
| H | 37.437 | 29.728 | 54.948 |
| H | 37.392 | 31.201 | 54.601 |
| O | 44.857 | 24.517 | 56.431 |
| H | 44.281 | 23.762 | 56.554 |
| H | 44.455 | 25.01  | 55.716 |
| O | 43.337 | 33.29  | 49.34  |
| H | 42.842 | 32.595 | 49.776 |
| H | 44.085 | 32.84  | 48.947 |
| O | 35.302 | 48.598 | 57.75  |
| H | 34.776 | 48.976 | 57.045 |
| H | 35.39  | 47.675 | 57.515 |
| O | 35.473 | 33.212 | 46.867 |
| H | 35.673 | 34.021 | 47.337 |
| H | 36.326 | 32.798 | 46.729 |
| O | 37.204 | 26.326 | 49.694 |
| H | 36.543 | 25.763 | 50.099 |
| H | 37.292 | 27.064 | 50.297 |
| O | 52.498 | 47.907 | 54.676 |
| H | 52.814 | 47.155 | 54.175 |
| H | 51.648 | 48.113 | 54.289 |

|   |        |        |        |
|---|--------|--------|--------|
| O | 31.169 | 40.828 | 54.768 |
| H | 30.581 | 40.092 | 54.939 |
| H | 31.092 | 41.382 | 55.546 |
| O | 38.65  | 40.759 | 49.978 |
| H | 38.354 | 39.977 | 50.444 |
| H | 39.592 | 40.794 | 50.142 |
| O | 40.781 | 36.208 | 32.392 |
| H | 40.282 | 36.984 | 32.138 |
| H | 40.33  | 35.877 | 33.169 |
| O | 46.356 | 42.686 | 35.344 |
| H | 46.392 | 43.245 | 34.568 |
| H | 45.589 | 42.13  | 35.203 |
| O | 31.263 | 42.734 | 39.186 |
| H | 31.289 | 43.068 | 40.083 |
| H | 31.92  | 42.038 | 39.17  |
| O | 36.281 | 48.062 | 40.071 |
| H | 36.978 | 48.627 | 39.738 |
| H | 36.737 | 47.282 | 40.389 |
| O | 43.515 | 35.366 | 35.824 |
| H | 43.383 | 36.314 | 35.825 |
| H | 44.17  | 35.215 | 36.504 |
| O | 46.381 | 40.762 | 42.485 |
| H | 46.72  | 41.198 | 41.703 |
| H | 45.435 | 40.725 | 42.347 |
| O | 48.089 | 29.675 | 35.603 |
| H | 48.887 | 29.529 | 36.111 |
| H | 47.39  | 29.308 | 36.145 |
| O | 30.37  | 45.139 | 38.131 |
| H | 29.436 | 44.934 | 38.177 |
| H | 30.804 | 44.358 | 38.473 |
| O | 45.291 | 47.099 | 39.644 |
| H | 45.852 | 46.325 | 39.68  |
| H | 44.533 | 46.871 | 40.183 |
| O | 44.888 | 29.346 | 40.288 |
| H | 45.635 | 29.903 | 40.068 |
| H | 44.142 | 29.946 | 40.315 |
| O | 37.991 | 51.15  | 43.651 |
| H | 38.644 | 50.454 | 43.586 |
| H | 37.47  | 50.919 | 44.421 |
| O | 49.069 | 43.526 | 31.976 |
| H | 49.599 | 42.909 | 32.48  |
| H | 48.183 | 43.419 | 32.322 |
| O | 45.745 | 44.122 | 45.047 |
| H | 45.304 | 43.316 | 45.317 |
| H | 45.038 | 44.693 | 44.748 |
| O | 47.64  | 35.813 | 41.848 |
| H | 47.311 | 36.712 | 41.831 |

|   |        |        |        |
|---|--------|--------|--------|
| H | 48.577 | 35.899 | 41.67  |
| O | 43.596 | 46.087 | 34.205 |
| H | 43.266 | 46.76  | 33.61  |
| H | 42.959 | 45.376 | 34.14  |
| O | 48.914 | 33.242 | 48.345 |
| H | 48.61  | 32.433 | 47.934 |
| H | 49.844 | 33.091 | 48.514 |
| O | 44.439 | 49.962 | 36.445 |
| H | 44.156 | 50.274 | 35.585 |
| H | 43.73  | 49.39  | 36.738 |
| O | 32.406 | 40.32  | 40.421 |
| H | 31.866 | 39.75  | 39.874 |
| H | 31.958 | 40.335 | 41.266 |
| O | 38.979 | 46.582 | 30.564 |
| H | 38.819 | 45.793 | 31.082 |
| H | 38.233 | 46.63  | 29.965 |
| O | 32.414 | 53.49  | 43.044 |
| H | 31.762 | 52.803 | 43.184 |
| H | 32.789 | 53.293 | 42.185 |
| O | 45.246 | 29.039 | 30.934 |
| H | 45.533 | 28.48  | 30.212 |
| H | 44.919 | 29.831 | 30.509 |
| O | 42.393 | 45.349 | 52.874 |
| H | 42.786 | 45.081 | 52.043 |
| H | 41.671 | 44.734 | 53.006 |
| O | 30.172 | 39.183 | 39.092 |
| H | 29.556 | 39.823 | 39.449 |
| H | 29.641 | 38.403 | 38.934 |
| O | 55.209 | 44.247 | 39.924 |
| H | 54.276 | 44.463 | 39.938 |
| H | 55.291 | 43.502 | 40.519 |
| O | 42.94  | 44.814 | 44.761 |
| H | 43.352 | 44.596 | 45.596 |
| H | 42.389 | 45.572 | 44.956 |
| O | 47.167 | 52.115 | 29.877 |
| H | 46.745 | 52.688 | 30.517 |
| H | 46.576 | 51.366 | 29.8   |
| O | 34.686 | 47.429 | 42.831 |
| H | 34.121 | 46.662 | 42.747 |
| H | 35.54  | 47.134 | 42.514 |
| O | 47.91  | 42.62  | 25.481 |
| H | 48.806 | 42.472 | 25.784 |
| H | 47.474 | 43.043 | 26.22  |
| O | 45.788 | 47.525 | 27.423 |
| H | 45.291 | 47.014 | 26.784 |
| H | 46.514 | 46.954 | 27.675 |
| O | 43.119 | 31.199 | 42.103 |



|   |        |        |        |
|---|--------|--------|--------|
| H | 42.377 | 31.567 | 42.584 |
| H | 43.089 | 31.632 | 41.25  |
| O | 31.585 | 40.729 | 46.127 |
| H | 32.109 | 39.937 | 46.245 |
| H | 30.828 | 40.603 | 46.7   |
| O | 45.465 | 35.302 | 37.777 |
| H | 45.398 | 35.906 | 38.517 |
| H | 46.405 | 35.149 | 37.678 |
| O | 48.48  | 26.994 | 37.832 |
| H | 47.55  | 27.214 | 37.87  |
| H | 48.868 | 27.462 | 38.572 |
| O | 42.608 | 37.765 | 49.876 |
| H | 42.033 | 37.128 | 50.3   |
| H | 43.453 | 37.32  | 49.814 |
| O | 42.594 | 38.48  | 30.761 |
| H | 42.143 | 39.324 | 30.758 |
| H | 42.001 | 37.89  | 30.295 |
| O | 33.974 | 44.756 | 44.515 |
| H | 33.935 | 44.052 | 45.162 |
| H | 34.433 | 44.371 | 43.768 |
| O | 38.414 | 31.573 | 49.659 |
| H | 39.017 | 31.624 | 50.401 |
| H | 38.139 | 32.477 | 49.511 |
| O | 42.785 | 40.154 | 44.042 |
| H | 43.051 | 40.693 | 43.296 |
| H | 43.524 | 39.564 | 44.186 |
| O | 40.696 | 34.671 | 36.746 |
| H | 40.79  | 33.756 | 37.01  |
| H | 41.535 | 34.89  | 36.341 |
| O | 39.189 | 29.698 | 47.708 |
| H | 39.466 | 28.811 | 47.935 |
| H | 38.944 | 30.094 | 48.545 |
| O | 29.385 | 38.667 | 43.087 |
| H | 28.78  | 38.3   | 42.444 |
| H | 29.491 | 37.975 | 43.74  |
| O | 46.159 | 44.662 | 38.802 |
| H | 46.957 | 44.545 | 38.286 |
| H | 45.53  | 45.039 | 38.187 |
| O | 35.892 | 40.677 | 48.842 |
| H | 34.987 | 40.962 | 48.719 |
| H | 36.191 | 41.155 | 49.615 |
| O | 37.592 | 41.298 | 46.87  |
| H | 37.07  | 40.931 | 47.584 |
| H | 37.346 | 42.223 | 46.845 |
| O | 40.284 | 46.864 | 41.12  |
| H | 40.32  | 46.345 | 41.924 |
| H | 40.224 | 47.77  | 41.423 |

|   |        |        |        |
|---|--------|--------|--------|
| O | 43.927 | 40.343 | 28.401 |
| H | 44.309 | 41.209 | 28.259 |
| H | 43.949 | 40.225 | 29.351 |
| O | 42.549 | 32.597 | 39.944 |
| H | 42.274 | 31.867 | 39.389 |
| H | 41.806 | 33.2   | 39.934 |
| O | 50.494 | 43.544 | 35.402 |
| H | 51.161 | 43.287 | 36.039 |
| H | 50.824 | 44.359 | 35.025 |
| O | 43.996 | 42.4   | 38.283 |
| H | 44.388 | 43.053 | 38.863 |
| H | 44.436 | 41.581 | 38.513 |
| O | 35.948 | 43.758 | 39.501 |
| H | 35.352 | 43.138 | 39.922 |
| H | 35.616 | 43.841 | 38.607 |
| O | 36.172 | 42.653 | 42.784 |
| H | 35.962 | 42.134 | 42.008 |
| H | 35.729 | 42.2   | 43.502 |
| O | 43.086 | 50.22  | 24.315 |
| H | 42.354 | 50.719 | 23.954 |
| H | 42.872 | 49.307 | 24.125 |
| O | 40.551 | 43.265 | 45.17  |
| H | 41.145 | 43.693 | 44.554 |
| H | 39.809 | 42.985 | 44.634 |
| O | 38.229 | 44.222 | 32.353 |
| H | 37.954 | 43.556 | 32.984 |
| H | 37.862 | 43.927 | 31.519 |
| O | 37.014 | 43.901 | 46.58  |
| H | 37.337 | 44.432 | 45.852 |
| H | 37.071 | 44.479 | 47.341 |
| O | 43.933 | 45.827 | 50.353 |
| H | 43.705 | 45.336 | 49.563 |
| H | 44.884 | 45.743 | 50.42  |
| O | 35.101 | 40.044 | 34.238 |
| H | 35.157 | 40.477 | 33.386 |
| H | 35.133 | 39.109 | 34.034 |
| O | 42.797 | 36.413 | 38.766 |
| H | 43.214 | 35.89  | 38.081 |
| H | 43.398 | 36.358 | 39.509 |
| O | 46.664 | 36.366 | 30.52  |
| H | 46.259 | 36.3   | 31.385 |
| H | 46.055 | 35.913 | 29.936 |
| O | 37.089 | 42.563 | 30.604 |
| H | 37.679 | 41.912 | 30.225 |
| H | 36.814 | 43.099 | 29.859 |
| O | 34.703 | 44.126 | 37.039 |
| H | 35.076 | 44.248 | 36.166 |

|   |        |        |        |
|---|--------|--------|--------|
| H | 33.938 | 44.702 | 37.055 |
| O | 45.567 | 38.942 | 34.101 |
| H | 46.346 | 38.857 | 34.65  |
| H | 44.935 | 38.334 | 34.485 |
| O | 41.454 | 40.119 | 35.85  |
| H | 41.831 | 40.616 | 35.124 |
| H | 41.414 | 40.745 | 36.573 |
| O | 44.219 | 37.387 | 43.443 |
| H | 44.03  | 36.828 | 44.197 |
| H | 43.889 | 36.895 | 42.691 |
| O | 36.368 | 49.362 | 37.151 |
| H | 36.522 | 49.813 | 37.981 |
| H | 35.468 | 49.043 | 37.215 |
| O | 41.037 | 50.075 | 51.786 |
| H | 41.36  | 50.655 | 52.476 |
| H | 41.668 | 49.356 | 51.762 |
| O | 37.734 | 45.883 | 27.338 |
| H | 37.217 | 46.017 | 28.132 |
| H | 37.789 | 46.751 | 26.938 |
| O | 40.716 | 42.903 | 54.082 |
| H | 39.947 | 42.486 | 53.694 |
| H | 40.439 | 43.143 | 54.966 |
| O | 42.906 | 46.499 | 40.689 |
| H | 41.989 | 46.593 | 40.433 |
| H | 42.917 | 46.707 | 41.624 |
| O | 46.59  | 44.678 | 33.46  |
| H | 46.316 | 45.138 | 32.667 |
| H | 47.104 | 45.323 | 33.945 |
| O | 26.29  | 37.218 | 41.705 |
| H | 26.723 | 37.024 | 40.874 |
| H | 25.682 | 36.49  | 41.834 |
| O | 36.699 | 45.443 | 41.558 |
| H | 36.645 | 44.839 | 42.298 |
| H | 36.397 | 44.931 | 40.808 |
| O | 43.097 | 35.331 | 47.521 |
| H | 42.342 | 35.756 | 47.927 |
| H | 43.267 | 34.567 | 48.073 |
| O | 38.698 | 38.466 | 47.969 |
| H | 38.49  | 39.33  | 48.326 |
| H | 37.845 | 38.067 | 47.798 |
| O | 49.445 | 45.662 | 49.442 |
| H | 49.393 | 46.477 | 48.942 |
| H | 48.938 | 45.033 | 48.929 |
| O | 34.772 | 41.554 | 40.125 |
| H | 33.89  | 41.335 | 40.427 |
| H | 35.259 | 40.733 | 40.191 |
| O | 38.677 | 41.649 | 43.971 |

|   |        |        |        |
|---|--------|--------|--------|
| H | 37.958 | 41.734 | 43.345 |
| H | 38.309 | 41.135 | 44.69  |
| O | 39.766 | 34.179 | 40.135 |
| H | 39.086 | 33.517 | 40.261 |
| H | 39.473 | 34.924 | 40.66  |
| O | 35.214 | 50.821 | 41.245 |
| H | 35.459 | 50.08  | 40.691 |
| H | 35.203 | 50.464 | 42.133 |
| O | 39.026 | 37.16  | 41.363 |
| H | 39.496 | 37.979 | 41.523 |
| H | 39.26  | 36.922 | 40.466 |
| O | 39.771 | 30.675 | 41.647 |
| H | 39.991 | 30.044 | 42.333 |
| H | 40.499 | 30.619 | 41.028 |
| O | 38.985 | 48.338 | 39.231 |
| H | 39.514 | 47.601 | 39.538 |
| H | 39.146 | 48.372 | 38.288 |
| O | 45.458 | 49.9   | 28.895 |
| H | 44.745 | 50.35  | 29.349 |
| H | 45.029 | 49.443 | 28.17  |
| O | 31.356 | 49.19  | 34.056 |
| H | 31.497 | 49.386 | 33.13  |
| H | 31.94  | 48.453 | 34.237 |
| O | 33.773 | 47.325 | 39.342 |
| H | 34.727 | 47.242 | 39.339 |
| H | 33.541 | 47.391 | 40.268 |
| O | 47.147 | 48.942 | 46.044 |
| H | 47.476 | 48.494 | 45.265 |
| H | 46.59  | 48.294 | 46.475 |
| O | 51.479 | 45.951 | 34.551 |
| H | 51.564 | 46.801 | 34.983 |
| H | 50.931 | 46.125 | 33.786 |
| O | 44.674 | 41.249 | 32.51  |
| H | 44.901 | 40.424 | 32.937 |
| H | 45.421 | 41.439 | 31.943 |
| O | 47.694 | 43.746 | 42.824 |
| H | 47.449 | 43.104 | 42.158 |
| H | 47.123 | 43.549 | 43.567 |
| O | 45.103 | 36.878 | 40.412 |
| H | 44.861 | 36.19  | 41.032 |
| H | 45.853 | 37.314 | 40.817 |
| O | 48.813 | 36.088 | 23.18  |
| H | 48.333 | 35.264 | 23.264 |
| H | 48.494 | 36.469 | 22.362 |
| O | 42.947 | 42.368 | 30.479 |
| H | 42.27  | 41.715 | 30.657 |
| H | 43.486 | 42.375 | 31.269 |

|   |        |        |        |
|---|--------|--------|--------|
| O | 48.144 | 39.644 | 44.256 |
| H | 48.66  | 39.27  | 43.542 |
| H | 47.508 | 40.211 | 43.82  |
| O | 46.754 | 30.844 | 39.253 |
| H | 47.185 | 31.495 | 39.806 |
| H | 46.626 | 31.288 | 38.415 |
| O | 41.286 | 42.003 | 38.081 |
| H | 42.223 | 42.196 | 38.042 |
| H | 40.994 | 42.399 | 38.902 |
| O | 42.593 | 39.108 | 40.222 |
| H | 42.593 | 38.234 | 39.833 |
| H | 41.964 | 39.05  | 40.941 |
| O | 52.424 | 33.58  | 27.407 |
| H | 52.587 | 33.281 | 26.512 |
| H | 51.7   | 34.201 | 27.323 |
| O | 45.049 | 39.589 | 39.099 |
| H | 44.256 | 39.269 | 39.527 |
| H | 45.595 | 38.81  | 38.992 |
| O | 43.419 | 38.257 | 36.164 |
| H | 42.864 | 39.032 | 36.076 |
| H | 43.89  | 38.392 | 36.987 |
| O | 43.492 | 36.073 | 31.188 |
| H | 43.349 | 37.004 | 31.02  |
| H | 42.691 | 35.783 | 31.624 |
| O | 48.995 | 35.626 | 39.029 |
| H | 48.962 | 35.426 | 38.093 |
| H | 49.908 | 35.478 | 39.274 |
| O | 41.984 | 47.21  | 36.159 |
| H | 41.206 | 46.657 | 36.229 |
| H | 42.515 | 46.793 | 35.481 |
| O | 34.647 | 40.846 | 44.118 |
| H | 34.978 | 40.153 | 44.689 |
| H | 33.792 | 40.528 | 43.827 |
| O | 42.697 | 48.737 | 38.445 |
| H | 42.254 | 48.249 | 37.75  |
| H | 43.046 | 48.061 | 39.027 |
| O | 33.504 | 32.944 | 39.79  |
| H | 34.448 | 33.096 | 39.747 |
| H | 33.332 | 32.766 | 40.714 |
| O | 36.156 | 33.9   | 39.835 |
| H | 36.778 | 33.574 | 40.485 |
| H | 36.7   | 34.336 | 39.18  |
| O | 47.595 | 49.587 | 35.46  |
| H | 47.319 | 49.18  | 36.281 |
| H | 48.446 | 49.977 | 35.66  |
| O | 29.127 | 40.52  | 47.203 |
| H | 29.25  | 39.582 | 47.349 |

|   |        |        |        |
|---|--------|--------|--------|
| H | 28.313 | 40.58  | 46.704 |
| O | 41.777 | 29.804 | 39.71  |
| H | 42.435 | 29.427 | 39.126 |
| H | 41.608 | 29.117 | 40.355 |
| O | 51.012 | 28.007 | 42.769 |
| H | 51.695 | 27.557 | 43.266 |
| H | 50.246 | 27.438 | 42.844 |
| O | 45.397 | 47.272 | 47.621 |
| H | 44.569 | 47.697 | 47.847 |
| H | 45.214 | 46.336 | 47.7   |
| O | 30.685 | 42.785 | 44.587 |
| H | 29.812 | 43.042 | 44.883 |
| H | 31.019 | 42.222 | 45.286 |
| O | 36.097 | 45.167 | 34.951 |
| H | 36.762 | 45.758 | 34.599 |
| H | 36.378 | 44.296 | 34.67  |
| O | 38.874 | 44.996 | 38.861 |
| H | 38.583 | 45.298 | 39.722 |
| H | 38.556 | 44.095 | 38.803 |
| O | 37.745 | 35.164 | 38.12  |
| H | 38.58  | 35.603 | 38.284 |
| H | 37.941 | 34.523 | 37.436 |
| O | 48.533 | 41.3   | 35.848 |
| H | 47.773 | 41.86  | 35.689 |
| H | 49.263 | 41.91  | 35.95  |
| O | 43.967 | 31.241 | 36.016 |
| H | 44.759 | 31.705 | 36.289 |
| H | 44.27  | 30.62  | 35.353 |
| O | 31.838 | 54.06  | 35.348 |
| H | 31.295 | 53.273 | 35.305 |
| H | 31.701 | 54.396 | 36.234 |
| O | 41.628 | 32.206 | 37.075 |
| H | 41.275 | 31.318 | 37.017 |
| H | 42.446 | 32.171 | 36.579 |
| O | 50.965 | 35.878 | 34.423 |
| H | 50.011 | 35.943 | 34.401 |
| H | 51.225 | 36.422 | 35.167 |
| O | 38.916 | 52.665 | 47.511 |
| H | 39.191 | 51.851 | 47.089 |
| H | 39.069 | 52.515 | 48.444 |
| O | 44.641 | 45.55  | 36.942 |
| H | 44.571 | 45.92  | 36.061 |
| H | 43.904 | 44.942 | 37.005 |
| O | 40.009 | 51.661 | 28.29  |
| H | 40.149 | 51.159 | 29.093 |
| H | 40.314 | 51.084 | 27.59  |
| O | 39.45  | 26.972 | 47.949 |

|   |        |        |        |
|---|--------|--------|--------|
| H | 39.028 | 26.942 | 48.807 |
| H | 38.807 | 26.589 | 47.352 |
| O | 43.319 | 34.974 | 41.662 |
| H | 43.493 | 34.195 | 41.135 |
| H | 42.906 | 34.637 | 42.458 |
| O | 45.541 | 33.156 | 16.876 |
| H | 46.367 | 33.53  | 17.182 |
| H | 45.588 | 33.221 | 15.922 |
| O | 40.665 | 43.676 | 22.967 |
| H | 40.223 | 43.495 | 22.138 |
| H | 40.933 | 44.593 | 22.901 |
| O | 43.332 | 47.913 | 19.515 |
| H | 43.458 | 48.44  | 18.725 |
| H | 44.176 | 47.951 | 19.965 |
| O | 31.449 | 40.456 | 13.709 |
| H | 31.987 | 40.396 | 14.498 |
| H | 31.412 | 41.393 | 13.516 |
| O | 38.052 | 40.866 | 22.899 |
| H | 38.816 | 40.746 | 23.464 |
| H | 38.393 | 41.326 | 22.131 |
| O | 47.721 | 38.724 | 21.862 |
| H | 47.124 | 38.116 | 22.298 |
| H | 47.227 | 39.541 | 21.799 |
| O | 35.786 | 44.878 | 14.973 |
| H | 36.05  | 44.796 | 14.056 |
| H | 35.647 | 45.817 | 15.098 |
| O | 43.03  | 34.194 | 19.661 |
| H | 43.327 | 33.285 | 19.619 |
| H | 43.405 | 34.604 | 18.882 |
| O | 28.726 | 41.767 | 12.795 |
| H | 29.223 | 42.182 | 13.5   |
| H | 27.813 | 41.98  | 12.989 |
| O | 45.873 | 40.744 | 20.894 |
| H | 45.452 | 39.89  | 20.99  |
| H | 45.418 | 41.307 | 21.52  |
| O | 42.85  | 35.491 | 22.108 |
| H | 41.997 | 35.922 | 22.158 |
| H | 42.831 | 35.018 | 21.276 |
| O | 41.295 | 49.462 | 20.593 |
| H | 41.734 | 48.705 | 20.205 |
| H | 40.75  | 49.094 | 21.288 |
| O | 47.286 | 35.547 | 12.729 |
| H | 47.286 | 36.17  | 13.457 |
| H | 47.143 | 36.087 | 11.952 |
| O | 39.593 | 46.584 | 24.405 |
| H | 39.409 | 45.666 | 24.604 |
| H | 39.403 | 47.049 | 25.22  |

|   |        |        |        |
|---|--------|--------|--------|
| O | 52.847 | 37.468 | 19.686 |
| H | 52.593 | 37.479 | 20.609 |
| H | 53.093 | 38.373 | 19.494 |
| O | 39.549 | 35.015 | 15.668 |
| H | 39.28  | 35.633 | 16.348 |
| H | 40.493 | 35.148 | 15.584 |
| O | 36.789 | 38.625 | 22.531 |
| H | 36.868 | 38.35  | 23.445 |
| H | 37.136 | 39.517 | 22.518 |
| O | 49.285 | 38.497 | 24.414 |
| H | 49.296 | 37.778 | 23.782 |
| H | 48.841 | 38.135 | 25.181 |
| O | 42.793 | 41.928 | 10.734 |
| H | 43.273 | 42.278 | 9.984  |
| H | 42.101 | 41.391 | 10.346 |
| O | 43.56  | 43.345 | 18.927 |
| H | 42.851 | 43.889 | 18.585 |
| H | 43.22  | 42.999 | 19.752 |
| O | 48.413 | 32.732 | 14.189 |
| H | 47.526 | 33.084 | 14.113 |
| H | 48.964 | 33.367 | 13.732 |
| O | 49.951 | 46.148 | 32.471 |
| H | 49.602 | 45.272 | 32.308 |
| H | 49.228 | 46.622 | 32.882 |
| O | 51.337 | 41.983 | 30.438 |
| H | 51.15  | 41.095 | 30.132 |
| H | 51.21  | 41.942 | 31.385 |
| O | 44.921 | 54.723 | 21.404 |
| H | 44.521 | 54.032 | 21.932 |
| H | 45.827 | 54.44  | 21.284 |
| O | 48.524 | 48.757 | 23.989 |
| H | 47.803 | 49.341 | 23.754 |
| H | 48.395 | 47.984 | 23.438 |
| O | 36.855 | 48.267 | 21.103 |
| H | 37.161 | 47.461 | 20.688 |
| H | 36.321 | 48.694 | 20.433 |
| O | 44.138 | 48.616 | 16.474 |
| H | 44.143 | 49.106 | 15.652 |
| H | 43.389 | 48.026 | 16.397 |
| O | 38.901 | 43.063 | 20.991 |
| H | 39.272 | 43.094 | 20.109 |
| H | 38.049 | 42.642 | 20.877 |
| O | 46.127 | 32.01  | 31.383 |
| H | 46.903 | 31.471 | 31.226 |
| H | 46.475 | 32.878 | 31.587 |
| O | 34.629 | 36.161 | 18.472 |
| H | 34.162 | 35.582 | 17.869 |



|   |        |        |        |
|---|--------|--------|--------|
| H | 34.2   | 36.023 | 19.316 |
| O | 36.649 | 38.097 | 15.168 |
| H | 36.156 | 37.296 | 14.989 |
| H | 37.055 | 37.943 | 16.021 |
| O | 28.227 | 46.479 | 8.707  |
| H | 28.645 | 45.687 | 8.37   |
| H | 28.84  | 46.813 | 9.363  |
| O | 40.609 | 37.466 | 20.215 |
| H | 41.163 | 38.128 | 20.63  |
| H | 39.999 | 37.198 | 20.902 |
| O | 37.239 | 36.154 | 20.952 |
| H | 37.998 | 35.929 | 21.49  |
| H | 36.62  | 36.55  | 21.565 |
| O | 41.454 | 51.292 | 14.733 |
| H | 40.868 | 51.375 | 15.485 |
| H | 40.878 | 51.056 | 14.005 |
| O | 49.296 | 38.25  | 9.923  |
| H | 48.444 | 38.683 | 9.982  |
| H | 49.247 | 37.736 | 9.116  |
| O | 45.354 | 41.937 | 23.83  |
| H | 46.276 | 42.145 | 23.984 |
| H | 45.186 | 41.171 | 24.379 |
| O | 51.168 | 37.395 | 12.231 |
| H | 50.676 | 37.863 | 11.556 |
| H | 51.833 | 38.021 | 12.519 |
| O | 38.172 | 46.23  | 19.209 |
| H | 38     | 45.367 | 18.831 |
| H | 39.126 | 46.303 | 19.217 |
| O | 36.417 | 40.873 | 16.36  |
| H | 36.383 | 39.982 | 16.708 |
| H | 37.335 | 41.131 | 16.449 |
| O | 29.73  | 35.441 | 12.516 |
| H | 29.48  | 35.877 | 11.701 |
| H | 28.899 | 35.193 | 12.92  |
| O | 37.081 | 41.59  | 13.567 |
| H | 36.48  | 41.226 | 14.218 |
| H | 37.88  | 41.779 | 14.058 |
| O | 46.156 | 43.949 | 12.074 |
| H | 46.862 | 44.351 | 12.579 |
| H | 45.693 | 44.687 | 11.679 |
| O | 38.233 | 42.151 | 25.485 |
| H | 37.743 | 42.974 | 25.494 |
| H | 37.941 | 41.708 | 24.688 |
| O | 29.899 | 44.295 | 11.32  |
| H | 28.951 | 44.164 | 11.345 |
| H | 30.11  | 44.341 | 10.388 |
| O | 45.476 | 46.6   | 22.937 |

|   |        |        |        |
|---|--------|--------|--------|
| H | 46.315 | 46.22  | 22.678 |
| H | 45.301 | 47.268 | 22.274 |
| O | 40.156 | 44.243 | 12.952 |
| H | 40.375 | 44.342 | 12.025 |
| H | 40.311 | 43.316 | 13.136 |
| O | 34.694 | 38.695 | 11.389 |
| H | 35.616 | 38.445 | 11.449 |
| H | 34.298 | 38.021 | 10.837 |
| O | 43.829 | 42.708 | 15.038 |
| H | 43.942 | 42.238 | 15.864 |
| H | 44.423 | 43.455 | 15.104 |
| O | 36.655 | 37.949 | 18.177 |
| H | 35.917 | 37.375 | 18.379 |
| H | 36.574 | 38.672 | 18.8   |
| O | 42.02  | 35.705 | 14.651 |
| H | 42.454 | 35.026 | 14.134 |
| H | 42.738 | 36.225 | 15.013 |
| O | 32.196 | 39.342 | 7.981  |
| H | 31.421 | 39.7   | 7.549  |
| H | 32.928 | 39.624 | 7.432  |
| O | 44.054 | 51.371 | 20.289 |
| H | 44.355 | 51.827 | 21.074 |
| H | 43.286 | 50.878 | 20.578 |
| O | 35.328 | 51.682 | 21.277 |
| H | 35.541 | 50.942 | 20.709 |
| H | 35.141 | 51.285 | 22.128 |
| O | 28.883 | 38.939 | 16.546 |
| H | 29.494 | 38.315 | 16.938 |
| H | 29.148 | 38.988 | 15.628 |
| O | 39.152 | 40.836 | 4.399  |
| H | 40.087 | 41.041 | 4.378  |
| H | 38.975 | 40.439 | 3.547  |
| O | 39.427 | 40.686 | 27.41  |
| H | 38.962 | 41.285 | 26.826 |
| H | 39.062 | 40.864 | 28.276 |
| O | 44.936 | 38.257 | 20.406 |
| H | 44.794 | 37.643 | 21.127 |
| H | 44.27  | 38.026 | 19.759 |
| O | 39.757 | 43.507 | 9.429  |
| H | 38.8   | 43.51  | 9.405  |
| H | 40.012 | 42.881 | 8.751  |
| O | 37.524 | 36.961 | 9.825  |
| H | 36.665 | 36.544 | 9.889  |
| H | 37.704 | 37.276 | 10.711 |
| O | 40.179 | 37.546 | 13.515 |
| H | 40.207 | 38.014 | 14.349 |
| H | 40.678 | 36.745 | 13.672 |

|   |        |        |        |
|---|--------|--------|--------|
| O | 41.488 | 42.909 | 28.084 |
| H | 42.399 | 43.126 | 27.888 |
| H | 41.511 | 42.557 | 28.974 |
| O | 38.78  | 34.414 | 13.338 |
| H | 38.075 | 35.061 | 13.301 |
| H | 39.105 | 34.464 | 14.236 |
| O | 40.932 | 35.044 | 11.264 |
| H | 41.098 | 35.954 | 11.019 |
| H | 40.275 | 35.099 | 11.958 |
| O | 34.945 | 35.904 | 14.854 |
| H | 34.042 | 35.613 | 14.981 |
| H | 35.477 | 35.217 | 15.254 |
| O | 36.613 | 44.634 | 24.813 |
| H | 36.625 | 45.155 | 25.616 |
| H | 36.415 | 45.265 | 24.121 |
| O | 34.859 | 30.94  | 14.649 |
| H | 33.982 | 31.168 | 14.34  |
| H | 34.773 | 30.888 | 15.6   |
| O | 37.753 | 50.32  | 14.357 |
| H | 37.088 | 50.458 | 13.682 |
| H | 38.066 | 51.199 | 14.568 |
| O | 37.287 | 44.305 | 17.179 |
| H | 37.811 | 43.504 | 17.158 |
| H | 36.879 | 44.347 | 16.314 |
| O | 33.326 | 40.678 | 15.773 |
| H | 33.428 | 41.629 | 15.734 |
| H | 33.935 | 40.345 | 15.114 |
| O | 47.107 | 40.478 | 18.392 |
| H | 46.812 | 40.474 | 19.302 |
| H | 47.898 | 39.939 | 18.394 |
| O | 54.468 | 32.281 | 9.511  |
| H | 55.195 | 32.81  | 9.839  |
| H | 53.759 | 32.434 | 10.135 |
| O | 45.385 | 33.958 | 14.235 |
| H | 45.98  | 34.065 | 13.493 |
| H | 44.512 | 34.065 | 13.859 |
| O | 41.481 | 39.715 | 21.271 |
| H | 40.977 | 39.981 | 22.04  |
| H | 42.221 | 40.322 | 21.248 |
| O | 44.501 | 39.677 | 25.423 |
| H | 44.732 | 38.877 | 25.895 |
| H | 43.554 | 39.755 | 25.533 |
| O | 44.433 | 37.191 | 15.345 |
| H | 45.377 | 37.15  | 15.501 |
| H | 44.317 | 37.956 | 14.78  |
| O | 39.177 | 37.403 | 17.943 |
| H | 39.574 | 37.509 | 18.808 |

|   |        |        |        |
|---|--------|--------|--------|
| H | 38.246 | 37.573 | 18.085 |
| O | 47.831 | 38.951 | 30.306 |
| H | 47.28  | 38.194 | 30.506 |
| H | 47.568 | 39.211 | 29.423 |
| O | 37.355 | 34.721 | 18.655 |
| H | 37.235 | 35.349 | 19.367 |
| H | 36.614 | 34.879 | 18.07  |
| O | 47.763 | 33.124 | 22.815 |
| H | 47.896 | 32.314 | 22.322 |
| H | 46.83  | 33.313 | 22.718 |
| O | 42.915 | 37.556 | 18.732 |
| H | 43.175 | 36.803 | 18.202 |
| H | 42.118 | 37.272 | 19.179 |
| O | 51.179 | 32.731 | 15.491 |
| H | 50.393 | 32.325 | 15.125 |
| H | 50.846 | 33.411 | 16.076 |
| O | 49.505 | 37.405 | 20.392 |
| H | 48.817 | 37.931 | 20.8   |
| H | 50.033 | 38.038 | 19.904 |
| O | 50.917 | 35.169 | 10.607 |
| H | 51.05  | 35.921 | 11.184 |
| H | 51.068 | 35.513 | 9.727  |
| O | 48.326 | 47.818 | 19.229 |
| H | 48.462 | 46.924 | 19.542 |
| H | 49.146 | 48.046 | 18.79  |
| O | 50.348 | 41.931 | 26.532 |
| H | 51.025 | 42.608 | 26.551 |
| H | 50.824 | 41.113 | 26.673 |
| O | 48.352 | 46.647 | 22.148 |
| H | 48.49  | 45.779 | 22.526 |
| H | 49.142 | 46.812 | 21.633 |
| O | 34.792 | 43.32  | 22.691 |
| H | 35.184 | 43.401 | 23.561 |
| H | 34.332 | 44.149 | 22.558 |
| O | 38.738 | 46.267 | 14.561 |
| H | 38.827 | 45.432 | 14.102 |
| H | 39.383 | 46.839 | 14.146 |
| O | 43.655 | 35.177 | 17.241 |
| H | 43.854 | 35.922 | 16.672 |
| H | 44.345 | 34.541 | 17.051 |
| O | 44.41  | 30.333 | 22.323 |
| H | 44.513 | 29.86  | 23.149 |
| H | 44.005 | 31.164 | 22.572 |
| O | 35.36  | 44.39  | 19.28  |
| H | 36.217 | 44.401 | 18.854 |
| H | 34.754 | 44.111 | 18.593 |
| O | 42.608 | 47.971 | 27.69  |

|   |        |        |        |
|---|--------|--------|--------|
| H | 42.006 | 48.123 | 28.419 |
| H | 43.386 | 47.59  | 28.098 |
| O | 51.209 | 43.728 | 16.317 |
| H | 50.276 | 43.617 | 16.501 |
| H | 51.397 | 43.081 | 15.637 |
| O | 37.918 | 53.375 | 14.536 |
| H | 38.206 | 53.859 | 15.31  |
| H | 38.457 | 53.72  | 13.824 |
| O | 39.391 | 48.686 | 22.523 |
| H | 38.533 | 48.813 | 22.119 |
| H | 39.289 | 47.9   | 23.06  |
| O | 42.098 | 47.788 | 24.12  |
| H | 41.863 | 47.547 | 23.224 |
| H | 41.399 | 47.418 | 24.659 |
| O | 38.705 | 43.45  | 1.891  |
| H | 38.29  | 42.772 | 1.358  |
| H | 38.824 | 43.041 | 2.749  |
| O | 37.396 | 40.954 | -2.97  |
| H | 37.363 | 41.523 | -2.201 |
| H | 38.093 | 40.328 | -2.776 |
| O | 30.796 | 37.384 | 4.32   |
| H | 31.034 | 36.548 | 3.92   |
| H | 30.579 | 37.163 | 5.226  |
| O | 42.672 | 43.502 | -1.277 |
| H | 42.201 | 43.959 | -1.973 |
| H | 43.166 | 42.818 | -1.73  |
| O | 32.761 | 44.373 | 2.031  |
| H | 33.633 | 44.559 | 2.379  |
| H | 32.309 | 45.217 | 2.056  |
| O | 37.682 | 33.93  | -0.877 |
| H | 37.11  | 34.548 | -0.422 |
| H | 38.548 | 34.338 | -0.846 |
| O | 39.576 | 50.788 | 1.817  |
| H | 39.825 | 50.061 | 2.388  |
| H | 38.883 | 50.43  | 1.262  |
| O | 40.937 | 40.88  | 8.944  |
| H | 40.076 | 40.461 | 8.917  |
| H | 41.234 | 40.875 | 8.034  |
| O | 27.028 | 34.573 | 12.846 |
| H | 26.817 | 33.657 | 13.025 |
| H | 26.25  | 34.916 | 12.405 |
| O | 44.342 | 30.438 | -1.178 |
| H | 43.436 | 30.373 | -1.479 |
| H | 44.734 | 29.597 | -1.414 |
| O | 35.094 | 31.892 | 6.674  |
| H | 35.651 | 32.541 | 7.104  |
| H | 35.432 | 31.049 | 6.976  |

|   |        |        |        |
|---|--------|--------|--------|
| O | 35.709 | 43.715 | -3.631 |
| H | 36.03  | 43.731 | -2.729 |
| H | 34.889 | 43.222 | -3.585 |
| O | 49.332 | 36.795 | 3.333  |
| H | 48.674 | 36.21  | 2.958  |
| H | 49.85  | 36.234 | 3.91   |
| O | 37.307 | 27.566 | 0.818  |
| H | 37.559 | 26.714 | 1.175  |
| H | 38.005 | 28.158 | 1.097  |
| O | 31.322 | 34.835 | 3.862  |
| H | 30.917 | 34.362 | 3.135  |
| H | 32.254 | 34.625 | 3.794  |
| O | 50.693 | 28.358 | 0.405  |
| H | 50.688 | 29.071 | -0.233 |
| H | 50.53  | 27.57  | -0.114 |
| O | 37.472 | 25.577 | 5.182  |
| H | 37.867 | 24.905 | 4.626  |
| H | 37.087 | 25.089 | 5.91   |
| O | 38.757 | 49.063 | 9.48   |
| H | 39.013 | 48.569 | 10.259 |
| H | 37.882 | 48.738 | 9.267  |
| O | 42.763 | 45.737 | 0.412  |
| H | 43.039 | 45.053 | -0.198 |
| H | 42.504 | 45.264 | 1.202  |
| O | 46.764 | 32.051 | 2.529  |
| H | 46.278 | 32.065 | 3.353  |
| H | 46.115 | 31.797 | 1.873  |
| O | 33.461 | 38.296 | 4.187  |
| H | 32.543 | 38.042 | 4.089  |
| H | 33.944 | 37.647 | 3.675  |
| O | 37.66  | 54.261 | 5.716  |
| H | 38.234 | 53.563 | 5.399  |
| H | 37.674 | 54.168 | 6.668  |
| O | 44.324 | 38.797 | 6.65   |
| H | 43.881 | 38.369 | 7.383  |
| H | 44.729 | 38.08  | 6.163  |
| O | 49.153 | 39.573 | 3.073  |
| H | 49.134 | 38.644 | 2.844  |
| H | 50.083 | 39.796 | 3.098  |
| O | 43.536 | 36.944 | -0.857 |
| H | 42.844 | 36.951 | -0.195 |
| H | 44.056 | 37.725 | -0.669 |
| O | 35.511 | 37.611 | 6.064  |
| H | 34.951 | 37.74  | 5.299  |
| H | 35.03  | 36.988 | 6.61   |
| O | 41.862 | 45.235 | 2.963  |
| H | 40.951 | 45.274 | 3.255  |

|   |        |        |        |
|---|--------|--------|--------|
| H | 42.375 | 45.346 | 3.763  |
| O | 33.376 | 30.911 | 9.543  |
| H | 32.488 | 31.262 | 9.488  |
| H | 33.304 | 30.167 | 10.14  |
| O | 48.759 | 43.275 | 8.893  |
| H | 48.542 | 42.562 | 8.292  |
| H | 49.549 | 43.669 | 8.522  |
| O | 33.78  | 42.45  | 12.768 |
| H | 33.903 | 41.523 | 12.977 |
| H | 34.654 | 42.759 | 12.53  |
| O | 34.317 | 31.85  | -1.645 |
| H | 34.72  | 31.849 | -0.777 |
| H | 34.061 | 30.939 | -1.791 |
| O | 41.835 | 37.626 | 8.417  |
| H | 40.915 | 37.368 | 8.361  |
| H | 41.882 | 38.181 | 9.195  |
| O | 48.883 | 41.946 | 11.736 |
| H | 49.009 | 42.889 | 11.634 |
| H | 47.962 | 41.802 | 11.519 |
| O | 31.406 | 42.966 | 6.889  |
| H | 31.617 | 42.089 | 6.567  |
| H | 32.252 | 43.341 | 7.136  |
| O | 46.505 | 36.904 | 10.297 |
| H | 46.598 | 37.849 | 10.419 |
| H | 46.694 | 36.762 | 9.37   |
| O | 44.57  | 43.025 | 8.637  |
| H | 45.262 | 43.681 | 8.547  |
| H | 44.99  | 42.2   | 8.394  |
| O | 48.682 | 33.648 | 11.604 |
| H | 49.482 | 33.942 | 11.168 |
| H | 48.408 | 34.397 | 12.133 |
| O | 24.833 | 43.516 | 4.366  |
| H | 25.169 | 44.098 | 5.048  |
| H | 25.366 | 43.715 | 3.597  |
| O | 35.11  | 35.297 | -0.025 |
| H | 34.252 | 35.119 | -0.408 |
| H | 35.322 | 36.184 | -0.315 |
| O | 34.898 | 43.78  | 4.414  |
| H | 35.433 | 42.989 | 4.35   |
| H | 34.878 | 43.98  | 5.35   |
| O | 41.993 | 37.844 | 11.238 |
| H | 41.413 | 37.889 | 11.999 |
| H | 42.83  | 38.185 | 11.554 |
| O | 46.879 | 39.576 | 10.197 |
| H | 46.545 | 40.121 | 10.909 |
| H | 46.525 | 39.975 | 9.403  |
| O | 32.736 | 31.542 | 5.289  |

|   |        |        |        |
|---|--------|--------|--------|
| H | 33.45  | 31.953 | 5.776  |
| H | 33.137 | 31.26  | 4.467  |
| O | 29.684 | 41.164 | 10.186 |
| H | 30.266 | 41.923 | 10.174 |
| H | 29.124 | 41.304 | 10.95  |
| O | 22.37  | 38.598 | 10.965 |
| H | 21.897 | 37.823 | 11.267 |
| H | 21.697 | 39.273 | 10.881 |
| O | 35.258 | 35.218 | 10.008 |
| H | 34.765 | 34.413 | 10.169 |
| H | 34.617 | 35.819 | 9.628  |
| O | 22.905 | 33.693 | 2.897  |
| H | 22.598 | 32.786 | 2.876  |
| H | 23.741 | 33.674 | 2.431  |
| O | 39.403 | 36.095 | 8.159  |
| H | 38.85  | 36.269 | 8.92   |
| H | 39.048 | 36.657 | 7.471  |
| O | 35.987 | 34.638 | 4.582  |
| H | 36.379 | 33.83  | 4.25   |
| H | 36.379 | 34.757 | 5.446  |
| O | 37.062 | 32.28  | 3.428  |
| H | 36.814 | 31.853 | 4.248  |
| H | 38.019 | 32.257 | 3.426  |
| O | 39.404 | 35.452 | 3.156  |
| H | 39.828 | 35.314 | 4.003  |
| H | 38.467 | 35.458 | 3.355  |
| O | 49.086 | 33.349 | 8.549  |
| H | 48.363 | 32.802 | 8.858  |
| H | 48.964 | 34.184 | 9      |
| O | 44.263 | 36.199 | 7.96   |
| H | 44.609 | 35.884 | 8.796  |
| H | 43.325 | 36.308 | 8.114  |
| O | 38.46  | 42.303 | 6.939  |
| H | 38.484 | 41.472 | 6.466  |
| H | 37.564 | 42.618 | 6.824  |
| O | 35.007 | 26.26  | 3.971  |
| H | 34.452 | 25.559 | 4.315  |
| H | 35.884 | 26.05  | 4.292  |
| O | 38.038 | 37.131 | -2.596 |
| H | 37.586 | 37.869 | -3.005 |
| H | 38.099 | 36.474 | -3.289 |
| O | 32.183 | 43.068 | 10.399 |
| H | 32.771 | 42.559 | 10.958 |
| H | 31.694 | 43.621 | 11.008 |
| O | 35.992 | 44.913 | 12.323 |
| H | 35.175 | 45.014 | 11.834 |
| H | 36.471 | 45.725 | 12.16  |



|   |        |        |        |
|---|--------|--------|--------|
| O | 28.85  | 36.835 | 10.292 |
| H | 28.446 | 37.423 | 10.931 |
| H | 29.613 | 37.318 | 9.972  |
| O | 32.569 | 37.371 | 15.757 |
| H | 33.071 | 38.071 | 16.175 |
| H | 32.998 | 36.565 | 16.045 |
| O | 38.246 | 39.397 | 8.582  |
| H | 38.006 | 39.975 | 9.306  |
| H | 37.904 | 38.54  | 8.837  |
| O | 49.841 | 39.98  | 18.091 |
| H | 50.429 | 40.63  | 18.478 |
| H | 50.291 | 39.694 | 17.296 |
| O | 45.486 | 49.438 | 6.793  |
| H | 44.647 | 49.457 | 6.333  |
| H | 46.139 | 49.566 | 6.104  |
| O | 40.136 | 48.461 | 3.807  |
| H | 40.472 | 48.926 | 4.573  |
| H | 40.112 | 47.543 | 4.076  |
| O | 43.24  | 47.879 | 2.295  |
| H | 43.816 | 47.203 | 1.939  |
| H | 42.515 | 47.393 | 2.689  |
| O | 42.355 | 45.33  | 9.201  |
| H | 41.65  | 44.688 | 9.283  |
| H | 43.13  | 44.878 | 9.535  |
| O | 30.365 | 28.624 | 12.671 |
| H | 30.244 | 29.573 | 12.711 |
| H | 31.253 | 28.51  | 12.332 |
| O | 35.474 | 42.092 | 8.872  |
| H | 34.91  | 41.352 | 8.645  |
| H | 36.152 | 41.714 | 9.431  |
| O | 41.435 | 45.608 | 19.125 |
| H | 42.17  | 46.174 | 19.361 |
| H | 41.085 | 45.992 | 18.322 |
| O | 46.16  | 40.773 | 7.698  |
| H | 46.907 | 40.938 | 7.122  |
| H | 45.636 | 40.123 | 7.229  |
| O | 46.311 | 38.901 | -1.136 |
| H | 46.092 | 39.693 | -0.645 |
| H | 46.78  | 38.351 | -0.507 |
| O | 41.755 | 32.686 | 5.914  |
| H | 42.156 | 31.817 | 5.909  |
| H | 42.381 | 33.236 | 6.385  |
| O | 50.049 | 41.999 | -0.304 |
| H | 50.85  | 42.312 | -0.724 |
| H | 49.351 | 42.23  | -0.918 |
| O | 44.745 | 44.307 | -4.622 |
| H | 44.096 | 43.646 | -4.863 |

|   |        |        |        |
|---|--------|--------|--------|
| H | 45.279 | 44.417 | -5.409 |
| O | 27.457 | 53.316 | 5.012  |
| H | 27.457 | 54.252 | 4.815  |
| H | 27.02  | 52.913 | 4.261  |
| O | 35.35  | 44.978 | 6.969  |
| H | 34.543 | 44.876 | 7.472  |
| H | 36.014 | 45.197 | 7.623  |
| O | 48.511 | 43.164 | 15.478 |
| H | 48.133 | 42.388 | 15.066 |
| H | 47.795 | 43.535 | 15.993 |
| O | 42.253 | 47.62  | 11.119 |
| H | 42.968 | 48.196 | 10.849 |
| H | 41.926 | 47.243 | 10.302 |
| O | 33.452 | 37.195 | 9.34   |
| H | 32.826 | 36.502 | 9.131  |
| H | 33.089 | 37.979 | 8.929  |
| O | 36.586 | 36.02  | 12.598 |
| H | 36.135 | 35.661 | 11.834 |
| H | 35.911 | 36.062 | 13.276 |
| O | 38.053 | 37.792 | 6.552  |
| H | 38.249 | 38.639 | 6.954  |
| H | 37.111 | 37.82  | 6.383  |
| O | 32.326 | 37.419 | 12.425 |
| H | 33.135 | 37.896 | 12.242 |
| H | 31.704 | 37.744 | 11.774 |
| O | 41.347 | 42.467 | 0.785  |
| H | 40.644 | 43.114 | 0.843  |
| H | 41.949 | 42.826 | 0.133  |
| O | 42.234 | 40.757 | 6.366  |
| H | 42.97  | 40.145 | 6.378  |
| H | 42.342 | 41.245 | 5.55   |
| O | 33.284 | 34.9   | 12.291 |
| H | 32.985 | 35.805 | 12.206 |
| H | 33.059 | 34.657 | 13.189 |
| O | 38.369 | 30.335 | 8.043  |
| H | 37.789 | 29.79  | 7.511  |
| H | 37.84  | 31.1   | 8.267  |
| O | 46.288 | 45.273 | 5.756  |
| H | 47.14  | 45.323 | 5.322  |
| H | 45.837 | 44.553 | 5.317  |
| O | 40.543 | 44.194 | 6.144  |
| H | 41.38  | 43.754 | 5.997  |
| H | 40.037 | 43.575 | 6.67   |
| O | 40.588 | 37.777 | 4.958  |
| H | 39.869 | 38.37  | 5.175  |
| H | 40.236 | 36.903 | 5.126  |
| O | 35.008 | 39.587 | 13.799 |

|   |        |        |        |
|---|--------|--------|--------|
| H | 34.942 | 39.161 | 12.944 |
| H | 35.676 | 39.085 | 14.266 |
| O | 29.369 | 37.299 | 6.589  |
| H | 29.642 | 38.018 | 7.159  |
| H | 28.644 | 36.885 | 7.056  |
| O | 42.525 | 39.986 | 17.71  |
| H | 43.373 | 40.399 | 17.548 |
| H | 42.741 | 39.148 | 18.12  |
| O | 37.229 | 40.933 | 10.851 |
| H | 37.129 | 41.517 | 11.603 |
| H | 37.347 | 40.065 | 11.237 |
| O | 36.593 | 41.51  | 4.569  |
| H | 37.45  | 41.097 | 4.464  |
| H | 36.033 | 41.065 | 3.934  |
| O | 31.601 | 42.133 | 3.044  |
| H | 32.253 | 42.109 | 3.745  |
| H | 31.749 | 42.972 | 2.608  |
| O | 45.998 | 43.908 | -2.163 |
| H | 46.4   | 44.774 | -2.092 |
| H | 45.432 | 43.969 | -2.933 |
| O | 28.046 | 36.976 | -1.811 |
| H | 27.517 | 37.402 | -2.485 |
| H | 28.225 | 37.668 | -1.174 |
| O | 57.031 | 40.056 | -0.509 |
| H | 57.866 | 40.226 | -0.073 |
| H | 57.247 | 39.447 | -1.215 |
| O | 47.283 | 36.652 | 7.876  |
| H | 46.562 | 36.781 | 7.259  |
| H | 48.07  | 36.854 | 7.37   |
| O | 34.853 | 40.255 | 2.889  |
| H | 34.392 | 39.584 | 3.393  |
| H | 34.201 | 40.578 | 2.267  |
| O | 47.187 | 28.667 | 5.169  |
| H | 48.058 | 28.27  | 5.185  |
| H | 46.894 | 28.564 | 4.263  |
| O | 45.672 | 30.56  | 11.967 |
| H | 45.635 | 29.689 | 11.572 |
| H | 46.489 | 30.936 | 11.64  |
| O | 47.646 | 34.85  | 1.727  |
| H | 48.455 | 34.53  | 1.328  |
| H | 47.257 | 34.076 | 2.133  |
| O | 47.65  | 37.199 | 0.549  |
| H | 48.604 | 37.169 | 0.466  |
| H | 47.416 | 36.35  | 0.923  |
| O | 27.922 | 33.043 | 4.69   |
| H | 28.771 | 32.609 | 4.775  |
| H | 27.533 | 32.656 | 3.906  |

|   |        |        |        |
|---|--------|--------|--------|
| O | 45.913 | 41.668 | -0.231 |
| H | 45.801 | 42.349 | -0.894 |
| H | 46.481 | 42.066 | 0.428  |
| O | 42.424 | 30.133 | 6.297  |
| H | 41.612 | 29.641 | 6.42   |
| H | 42.53  | 30.189 | 5.348  |
| O | 31.6   | 29.524 | 7.559  |
| H | 32.504 | 29.508 | 7.871  |
| H | 31.57  | 30.262 | 6.949  |
| O | 39.548 | 45.731 | 3.996  |
| H | 39.726 | 45.048 | 4.643  |
| H | 38.758 | 45.434 | 3.545  |
| O | 43.015 | 48.999 | 5.725  |
| H | 42.589 | 48.572 | 6.468  |
| H | 43.244 | 48.281 | 5.135  |
| O | 45.334 | 34.123 | 6.653  |
| H | 44.815 | 34.708 | 7.205  |
| H | 45.894 | 33.648 | 7.268  |
| O | 37.856 | 38.379 | 12.007 |
| H | 37.633 | 37.471 | 12.213 |
| H | 38.736 | 38.496 | 12.365 |
| O | 50.207 | 48.124 | 0.026  |
| H | 50.799 | 48.557 | -0.589 |
| H | 49.397 | 48.631 | -0.024 |
| O | 37.247 | 31.875 | 13.396 |
| H | 36.37  | 31.886 | 13.779 |
| H | 37.64  | 32.703 | 13.673 |
| O | 33.097 | 50.784 | 6.834  |
| H | 33.573 | 50.814 | 7.664  |
| H | 32.773 | 51.677 | 6.712  |
| O | 43.194 | 33.135 | 8.703  |
| H | 43.927 | 32.551 | 8.507  |
| H | 43.555 | 33.774 | 9.318  |
| O | 45.925 | 36.778 | 5.33   |
| H | 46.81  | 36.558 | 5.039  |
| H | 45.449 | 35.948 | 5.3    |
| O | 47.498 | 46.33  | -2.023 |
| H | 48.276 | 46.208 | -2.568 |
| H | 46.892 | 46.82  | -2.578 |
| O | 37.181 | 51.334 | 8.017  |
| H | 36.92  | 50.486 | 8.377  |
| H | 38.016 | 51.162 | 7.582  |
| O | 30.524 | 50.164 | 5.862  |
| H | 30.203 | 49.303 | 6.129  |
| H | 31.475 | 50.103 | 5.949  |
| O | 43.348 | 43.83  | 6.296  |
| H | 43.57  | 43.543 | 7.182  |

|   |        |        |        |
|---|--------|--------|--------|
| H | 44.106 | 43.582 | 5.767  |
| O | 40.487 | 32.964 | 9.615  |
| H | 41.255 | 33.08  | 9.056  |
| H | 40.465 | 33.751 | 10.159 |
| O | 47.261 | 28.366 | 2.447  |
| H | 47.971 | 28.929 | 2.139  |
| H | 47.494 | 27.493 | 2.132  |
| O | 46.075 | 32.576 | -2.63  |
| H | 45.192 | 32.57  | -2.26  |
| H | 46.653 | 32.493 | -1.872 |
| O | 48.889 | 24.248 | -3.699 |
| H | 49.392 | 23.526 | -3.322 |
| H | 49.204 | 24.315 | -4.6   |
| O | 39.967 | 48.095 | 12.716 |
| H | 40.724 | 47.695 | 12.287 |
| H | 40.103 | 49.036 | 12.612 |
| O | 33.181 | 29.613 | 11.934 |
| H | 33.409 | 30.524 | 12.12  |
| H | 33.964 | 29.117 | 12.171 |
| O | 42.968 | 33.602 | 12.858 |
| H | 42.211 | 33.964 | 12.398 |
| H | 43.001 | 32.686 | 12.58  |
| O | 45.369 | 42.938 | 4.746  |
| H | 44.964 | 43.098 | 3.893  |
| H | 46.062 | 42.303 | 4.567  |
| O | 36.504 | 21.86  | 53.376 |
| H | 36.472 | 22.09  | 54.305 |
| H | 35.76  | 22.321 | 52.99  |
| O | 42.018 | 23.758 | 53.365 |
| H | 42.122 | 22.852 | 53.075 |
| H | 42.914 | 24.08  | 53.468 |
| O | 31.929 | 24.559 | 63.512 |
| H | 32.786 | 24.172 | 63.33  |
| H | 31.622 | 24.871 | 62.66  |
| O | 42.704 | 20.333 | 51.682 |
| H | 42.628 | 21.035 | 51.036 |
| H | 43.431 | 20.602 | 52.243 |
| O | 41.031 | 26.446 | 51.47  |
| H | 40.533 | 25.632 | 51.398 |
| H | 41.946 | 26.174 | 51.388 |
| O | 30.126 | 15.218 | 61.017 |
| H | 30.922 | 15.568 | 61.417 |
| H | 30.109 | 15.603 | 60.141 |
| O | 30.165 | 21.797 | 63.879 |
| H | 29.736 | 22.516 | 64.344 |
| H | 29.981 | 21.967 | 62.955 |
| O | 30.712 | 23.528 | 54.097 |

|   |        |        |        |
|---|--------|--------|--------|
| H | 30.607 | 24.017 | 53.281 |
| H | 30.406 | 22.645 | 53.888 |
| O | 36.6   | 23.359 | 58.818 |
| H | 37.001 | 22.793 | 59.478 |
| H | 37.323 | 23.596 | 58.236 |
| O | 42.553 | 20.872 | 58.229 |
| H | 43.153 | 21.401 | 58.754 |
| H | 42.585 | 21.267 | 57.358 |
| O | 38.168 | 8.302  | 55.525 |
| H | 39.046 | 8.25   | 55.902 |
| H | 38.01  | 7.431  | 55.162 |
| O | 41.316 | 11.141 | 59.583 |
| H | 41.04  | 11.752 | 60.267 |
| H | 40.868 | 11.447 | 58.794 |
| O | 35.438 | 20.998 | 67.35  |
| H | 35.486 | 20.851 | 68.295 |
| H | 35.352 | 20.122 | 66.975 |
| O | 29.641 | 21.051 | 53.501 |
| H | 30.343 | 20.548 | 53.089 |
| H | 28.947 | 20.41  | 53.658 |
| O | 41.534 | 18.549 | 54.824 |
| H | 40.858 | 19.015 | 55.317 |
| H | 41.21  | 17.65  | 54.763 |
| O | 41.559 | 18.625 | 60.871 |
| H | 40.947 | 18.831 | 60.165 |
| H | 41.15  | 17.898 | 61.34  |
| O | 27.964 | 28.239 | 52.096 |
| H | 28.663 | 27.603 | 52.249 |
| H | 27.964 | 28.371 | 51.148 |
| O | 50.56  | 29.919 | 57.319 |
| H | 50.36  | 30.768 | 56.925 |
| H | 51.297 | 29.585 | 56.807 |
| O | 52.929 | 11.713 | 59.532 |
| H | 52.187 | 11.107 | 59.547 |
| H | 53.576 | 11.285 | 58.972 |
| O | 36.571 | 17.965 | 57.196 |
| H | 36.316 | 17.046 | 57.12  |
| H | 36.272 | 18.366 | 56.38  |
| O | 36.272 | 29.196 | 56.317 |
| H | 36.425 | 28.269 | 56.5   |
| H | 36.609 | 29.651 | 57.089 |
| O | 47.162 | 17.709 | 52.789 |
| H | 46.599 | 16.936 | 52.753 |
| H | 46.588 | 18.408 | 53.104 |
| O | 41.031 | 18.056 | 51.281 |
| H | 41.4   | 17.776 | 50.444 |
| H | 41.492 | 18.869 | 51.487 |

|   |        |        |        |
|---|--------|--------|--------|
| O | 34.163 | 16.879 | 53.408 |
| H | 34.023 | 16.392 | 54.22  |
| H | 34.447 | 16.217 | 52.778 |
| O | 38.727 | 20.079 | 49.277 |
| H | 38.917 | 19.822 | 48.375 |
| H | 37.775 | 20.177 | 49.304 |
| O | 29.759 | 20.276 | 57.77  |
| H | 28.84  | 20.44  | 57.561 |
| H | 30.145 | 19.99  | 56.942 |
| O | 36.32  | 26.832 | 57.48  |
| H | 36.855 | 27.064 | 58.239 |
| H | 35.469 | 26.596 | 57.849 |
| O | 38.499 | 21.532 | 45.411 |
| H | 38.791 | 22.28  | 45.933 |
| H | 37.662 | 21.81  | 45.04  |
| O | 40.448 | 29.271 | 54.148 |
| H | 41.298 | 29.56  | 54.479 |
| H | 39.831 | 29.93  | 54.465 |
| O | 41.748 | 15.373 | 52.226 |
| H | 41.565 | 16.06  | 51.585 |
| H | 41.767 | 15.829 | 53.067 |
| O | 35.405 | 18.723 | 54.844 |
| H | 35.767 | 19.216 | 54.107 |
| H | 34.791 | 18.109 | 54.443 |
| O | 30.115 | 17.857 | 62.582 |
| H | 30.966 | 17.422 | 62.636 |
| H | 30.221 | 18.503 | 61.884 |
| O | 34.796 | 28.536 | 61.297 |
| H | 34.688 | 27.844 | 61.95  |
| H | 35.702 | 28.449 | 61.003 |
| O | 47.212 | 23.249 | 50.625 |
| H | 47.798 | 23.992 | 50.479 |
| H | 46.333 | 23.624 | 50.58  |
| O | 31.871 | 29.903 | 54.752 |
| H | 31.054 | 30.096 | 55.212 |
| H | 32.482 | 29.651 | 55.444 |
| O | 49.709 | 22.606 | 49.411 |
| H | 49.617 | 21.818 | 48.876 |
| H | 48.845 | 22.732 | 49.803 |
| O | 37.696 | 28.544 | 51.663 |
| H | 37.737 | 28.123 | 52.522 |
| H | 38.104 | 29.4   | 51.795 |
| O | 35.132 | 16.219 | 62.349 |
| H | 35.511 | 16.171 | 61.471 |
| H | 35.181 | 17.147 | 62.58  |
| O | 36.426 | 12.351 | 56.035 |
| H | 35.744 | 12.095 | 55.415 |

|   |        |        |        |
|---|--------|--------|--------|
| H | 36.206 | 11.883 | 56.84  |
| O | 36.022 | 16.86  | 59.902 |
| H | 35.841 | 15.988 | 59.551 |
| H | 36.834 | 17.127 | 59.472 |
| O | 39.79  | 22.623 | 54.419 |
| H | 40.436 | 23.162 | 53.962 |
| H | 39.428 | 22.055 | 53.74  |
| O | 41.814 | 15.773 | 55.026 |
| H | 42.294 | 14.97  | 54.826 |
| H | 42.279 | 16.151 | 55.773 |
| O | 39.007 | 15.214 | 56.829 |
| H | 38.661 | 15.926 | 57.368 |
| H | 38.371 | 15.119 | 56.121 |
| O | 31.965 | 17.512 | 59.307 |
| H | 32.189 | 16.602 | 59.111 |
| H | 32.739 | 18.01  | 59.044 |
| O | 33.193 | 15.379 | 51.259 |
| H | 32.37  | 14.961 | 51.513 |
| H | 33.143 | 16.256 | 51.64  |
| O | 39.299 | 20.341 | 55.92  |
| H | 38.526 | 20.482 | 56.466 |
| H | 39.477 | 21.198 | 55.532 |
| O | 40.825 | 8.651  | 58.862 |
| H | 40.922 | 9.548  | 59.183 |
| H | 40.714 | 8.747  | 57.916 |
| O | 35.327 | 13.848 | 59.056 |
| H | 35.938 | 13.131 | 58.889 |
| H | 34.949 | 13.647 | 59.912 |
| O | 34.122 | 22.123 | 51.042 |
| H | 33.502 | 21.547 | 50.595 |
| H | 33.912 | 22.027 | 51.971 |
| O | 40.37  | 16.298 | 61.506 |
| H | 39.83  | 15.852 | 62.159 |
| H | 40.942 | 15.613 | 61.16  |
| O | 35.974 | 24.055 | 47.506 |
| H | 36.07  | 23.634 | 46.652 |
| H | 36.428 | 24.893 | 47.413 |
| O | 23.364 | 26.568 | 58.404 |
| H | 23.84  | 25.745 | 58.516 |
| H | 23.555 | 27.065 | 59.2   |
| O | 31.577 | 25.211 | 49.046 |
| H | 31.62  | 24.654 | 48.269 |
| H | 31.589 | 24.599 | 49.781 |
| O | 42.119 | 27.501 | 57.388 |
| H | 41.608 | 28.235 | 57.729 |
| H | 42.621 | 27.874 | 56.664 |
| O | 29.088 | 11.313 | 52.199 |



|   |        |        |        |
|---|--------|--------|--------|
| H | 29.15  | 10.431 | 51.833 |
| H | 28.42  | 11.243 | 52.881 |
| O | 46.81  | 16.703 | 49.096 |
| H | 47.56  | 17.174 | 49.459 |
| H | 47.07  | 15.782 | 49.121 |
| O | 32.602 | 23.287 | 60.44  |
| H | 31.879 | 23.132 | 59.832 |
| H | 32.36  | 22.802 | 61.228 |
| O | 36.649 | 19.303 | 52.337 |
| H | 36.727 | 20.207 | 52.643 |
| H | 36.105 | 19.361 | 51.553 |
| O | 44.471 | 29.153 | 43.408 |
| H | 44.024 | 28.47  | 42.908 |
| H | 44.149 | 29.973 | 43.033 |
| O | 47.403 | 14.404 | 54.574 |
| H | 47.308 | 13.49  | 54.841 |
| H | 47.021 | 14.906 | 55.294 |
| O | 44.495 | 19.941 | 48.641 |
| H | 43.892 | 19.534 | 49.263 |
| H | 45.279 | 20.13  | 49.157 |
| O | 32.458 | 21.514 | 62.326 |
| H | 32.188 | 20.633 | 62.584 |
| H | 32.076 | 22.086 | 62.992 |
| O | 32.118 | 18.324 | 47.789 |
| H | 32.669 | 18.728 | 47.119 |
| H | 31.506 | 17.776 | 47.297 |
| O | 39.322 | 24.451 | 50.597 |
| H | 38.493 | 24.716 | 50.201 |
| H | 39.088 | 23.734 | 51.187 |
| O | 23.368 | 6.366  | 54.272 |
| H | 22.72  | 6.263  | 54.969 |
| H | 23.449 | 5.492  | 53.89  |
| O | 40.368 | 25.634 | 63.062 |
| H | 40.985 | 26.356 | 62.946 |
| H | 40.15  | 25.653 | 63.994 |
| O | 44.073 | 23.927 | 49.099 |
| H | 44.231 | 24.166 | 48.186 |
| H | 43.586 | 23.104 | 49.05  |
| O | 43.198 | 20.122 | 46.144 |
| H | 42.297 | 19.827 | 46.273 |
| H | 43.542 | 20.236 | 47.031 |
| O | 35.413 | 24.39  | 50.217 |
| H | 34.708 | 23.818 | 50.52  |
| H | 35.814 | 23.912 | 49.491 |
| O | 31.31  | 23.086 | 46.993 |
| H | 30.37  | 23.233 | 47.097 |
| H | 31.385 | 22.572 | 46.189 |

|   |        |        |        |
|---|--------|--------|--------|
| O | 40.981 | 14.783 | 58.56  |
| H | 40.225 | 14.927 | 57.99  |
| H | 40.607 | 14.436 | 59.37  |
| O | 39.405 | 24.227 | 45.694 |
| H | 38.827 | 24.961 | 45.903 |
| H | 40.096 | 24.612 | 45.156 |
| O | 33.553 | 14.399 | 54.83  |
| H | 33.656 | 13.461 | 54.667 |
| H | 34.312 | 14.634 | 55.365 |
| O | 39.639 | 13.361 | 60.834 |
| H | 39.454 | 12.656 | 61.455 |
| H | 38.783 | 13.747 | 60.648 |
| O | 30.565 | 32.501 | 58.531 |
| H | 30.173 | 32.309 | 57.679 |
| H | 31.036 | 31.701 | 58.763 |
| O | 39.981 | 16.543 | 45.699 |
| H | 39.077 | 16.468 | 46.004 |
| H | 40.41  | 15.752 | 46.027 |
| O | 45.566 | 15.669 | 56.416 |
| H | 44.98  | 16.425 | 56.379 |
| H | 44.987 | 14.925 | 56.582 |
| O | 35.833 | 19.874 | 49.836 |
| H | 35.267 | 20.645 | 49.792 |
| H | 35.256 | 19.141 | 49.624 |
| O | 33.934 | 17.684 | 49.486 |
| H | 33.991 | 16.749 | 49.292 |
| H | 33.182 | 17.99  | 48.979 |
| O | 45.754 | 31.262 | 52.795 |
| H | 45.411 | 30.632 | 52.162 |
| H | 46.404 | 31.765 | 52.305 |
| O | 33.613 | 29.428 | 56.928 |
| H | 33.764 | 28.835 | 57.664 |
| H | 34.264 | 29.171 | 56.276 |
| O | 31.044 | 24.077 | 56.694 |
| H | 31.108 | 25.025 | 56.807 |
| H | 31.076 | 23.946 | 55.746 |
| O | 41.593 | 23.8   | 47.158 |
| H | 40.803 | 23.959 | 46.64  |
| H | 41.315 | 23.184 | 47.835 |
| O | 41.383 | 22.012 | 49.853 |
| H | 40.708 | 22.565 | 50.245 |
| H | 40.914 | 21.228 | 49.567 |
| O | 38.888 | 21.713 | 51.516 |
| H | 37.954 | 21.674 | 51.724 |
| H | 38.996 | 21.108 | 50.783 |
| O | 38.12  | 15.498 | 51.107 |
| H | 38.869 | 14.905 | 51.159 |

|   |        |        |        |
|---|--------|--------|--------|
| H | 38.161 | 16.007 | 51.917 |
| O | 31.806 | 15.583 | 44.608 |
| H | 32.33  | 15.278 | 45.349 |
| H | 32.214 | 16.41  | 44.35  |
| O | 42.836 | 13.292 | 54.629 |
| H | 42.974 | 13.243 | 55.574 |
| H | 43.549 | 12.773 | 54.255 |
| O | 36.316 | 17.909 | 44.681 |
| H | 36.823 | 17.396 | 44.052 |
| H | 35.405 | 17.782 | 44.416 |
| O | 35.589 | 15.727 | 46.397 |
| H | 35.653 | 16.407 | 45.727 |
| H | 36.329 | 15.894 | 46.98  |
| O | 31.95  | 26.468 | 55.268 |
| H | 32.441 | 27.028 | 54.667 |
| H | 32.339 | 25.6   | 55.159 |
| O | 37.018 | 25.599 | 54.77  |
| H | 36.885 | 26.105 | 55.572 |
| H | 37.73  | 26.05  | 54.318 |
| O | 33.229 | 22.178 | 53.845 |
| H | 33.268 | 21.607 | 54.612 |
| H | 32.378 | 22.612 | 53.913 |
| O | 45.52  | 28.77  | 47.774 |
| H | 44.977 | 29.558 | 47.749 |
| H | 46.356 | 29.043 | 47.395 |
| O | 38.54  | 19.069 | 46.542 |
| H | 37.847 | 18.443 | 46.332 |
| H | 38.29  | 19.868 | 46.077 |
| O | 25.877 | 18.23  | 55.269 |
| H | 25.865 | 18.405 | 56.21  |
| H | 24.954 | 18.193 | 55.02  |
| O | 42.821 | 22.799 | 56.032 |
| H | 42.256 | 23.521 | 56.305 |
| H | 42.589 | 22.646 | 55.116 |
| O | 46.399 | 20.459 | 50.251 |
| H | 47.271 | 20.076 | 50.341 |
| H | 46.513 | 21.376 | 50.497 |
| O | 48.245 | 11.338 | 50.264 |
| H | 48.589 | 11.35  | 51.157 |
| H | 47.296 | 11.273 | 50.373 |
| O | 47.491 | 10.281 | 54.642 |
| H | 47.524 | 9.395  | 55.004 |
| H | 48.06  | 10.247 | 53.873 |
| O | 31.05  | 18.862 | 52.74  |
| H | 31.893 | 19.311 | 52.671 |
| H | 30.827 | 18.629 | 51.839 |
| O | 38.266 | 21.331 | 59.877 |

|   |        |        |        |
|---|--------|--------|--------|
| H | 38.146 | 20.664 | 60.553 |
| H | 39.183 | 21.591 | 59.957 |
| O | 37.062 | 16.598 | 48.8   |
| H | 36.828 | 16.102 | 49.585 |
| H | 37.677 | 17.262 | 49.111 |
| O | 35.855 | 22.605 | 55.907 |
| H | 34.953 | 22.646 | 56.224 |
| H | 36.375 | 22.419 | 56.689 |
| O | 44.69  | 24.874 | 62.434 |
| H | 45.48  | 24.467 | 62.076 |
| H | 44.486 | 24.356 | 63.213 |
| O | 27.584 | 9.514  | 58.575 |
| H | 28.258 | 9.654  | 59.239 |
| H | 27.168 | 10.369 | 58.471 |
| O | 44.385 | 11.383 | 56.917 |
| H | 45.312 | 11.423 | 57.152 |
| H | 44.383 | 11.147 | 55.989 |
| O | 51.652 | 17.548 | 54.941 |
| H | 51.837 | 17.395 | 55.867 |
| H | 50.697 | 17.56  | 54.886 |
| O | 52.205 | 10.557 | 47.403 |
| H | 52.388 | 9.642  | 47.191 |
| H | 51.323 | 10.545 | 47.774 |
| O | 47.432 | 29.265 | 57.777 |
| H | 47.625 | 30.147 | 58.096 |
| H | 48.254 | 28.966 | 57.389 |
| O | 39.267 | 26.6   | 53.674 |
| H | 39.797 | 27.352 | 53.937 |
| H | 39.824 | 26.117 | 53.062 |
| O | 37.429 | 30.653 | 58.283 |
| H | 37.633 | 30.154 | 59.074 |
| H | 37.552 | 31.567 | 58.538 |
| O | 39.617 | 31.726 | 56.454 |
| H | 39.176 | 31.34  | 55.697 |
| H | 38.914 | 31.894 | 57.081 |
| O | 41.288 | 8.127  | 55.734 |
| H | 41.348 | 9.083  | 55.733 |
| H | 41.992 | 7.843  | 55.15  |
| O | 45.89  | 18.723 | 58.082 |
| H | 46.479 | 18.746 | 58.836 |
| H | 45.436 | 19.565 | 58.106 |
| O | 35.416 | 15.293 | 56.693 |
| H | 35.547 | 14.731 | 57.457 |
| H | 36.149 | 15.085 | 56.114 |
| O | 33.076 | 26.34  | 51.987 |
| H | 33.685 | 27.078 | 51.969 |
| H | 33.598 | 25.607 | 52.315 |

|   |        |        |        |
|---|--------|--------|--------|
| O | 38.833 | 12.838 | 54.645 |
| H | 39.355 | 13.612 | 54.857 |
| H | 37.947 | 13.062 | 54.927 |
| O | 33.088 | 20.338 | 56.378 |
| H | 33.501 | 19.528 | 56.677 |
| H | 33.288 | 20.976 | 57.064 |
| O | 37.224 | 11.292 | 58.636 |
| H | 38.142 | 11.152 | 58.406 |
| H | 36.873 | 10.41  | 58.767 |
| O | 47.64  | 13.947 | 49.682 |
| H | 47.849 | 13.119 | 50.115 |
| H | 47.305 | 13.691 | 48.823 |
| O | 27.993 | 27.469 | 49.192 |
| H | 27.718 | 26.553 | 49.161 |
| H | 27.24  | 27.956 | 48.856 |
| O | 35.817 | 14.353 | 52.774 |
| H | 36.148 | 14.335 | 51.876 |
| H | 34.917 | 14.037 | 52.704 |
| O | 29.766 | 5.879  | 50.407 |
| H | 29.808 | 4.927  | 50.317 |
| H | 30.511 | 6.201  | 49.899 |
| O | 49.864 | 27.966 | 50.35  |
| H | 49.162 | 28.431 | 50.805 |
| H | 49.739 | 28.188 | 49.427 |
| O | 35.743 | 30.236 | 50.608 |
| H | 36.196 | 29.459 | 50.937 |
| H | 36.445 | 30.822 | 50.327 |
| O | 42.976 | 24.131 | 35.2   |
| H | 42.24  | 24.626 | 34.84  |
| H | 42.57  | 23.475 | 35.767 |
| O | 40.259 | 15.354 | 40.356 |
| H | 39.626 | 15.204 | 39.654 |
| H | 40.515 | 16.271 | 40.255 |
| O | 42.715 | 14.608 | 42.353 |
| H | 42.187 | 15.283 | 42.779 |
| H | 43.439 | 14.453 | 42.96  |
| O | 32.862 | 14.371 | 46.945 |
| H | 33.744 | 14.734 | 46.872 |
| H | 32.94  | 13.684 | 47.607 |
| O | 40.672 | 17.694 | 36.949 |
| H | 40.759 | 18.621 | 37.173 |
| H | 39.794 | 17.62  | 36.576 |
| O | 42.58  | 8.391  | 38.674 |
| H | 43.045 | 7.897  | 39.349 |
| H | 41.704 | 8.007  | 38.656 |
| O | 53.299 | 23.088 | 40.15  |
| H | 52.498 | 23.037 | 39.627 |

|   |        |        |        |
|---|--------|--------|--------|
| H | 53.507 | 22.178 | 40.359 |
| O | 46.061 | 14.439 | 37.033 |
| H | 46.908 | 14.716 | 36.684 |
| H | 45.429 | 14.702 | 36.364 |
| O | 42.318 | 13.658 | 33.969 |
| H | 42.314 | 14.082 | 34.827 |
| H | 43.208 | 13.79  | 33.641 |
| O | 42.184 | 24.455 | 38.435 |
| H | 42.156 | 23.685 | 37.867 |
| H | 42.462 | 24.114 | 39.286 |
| O | 42.807 | 28.997 | 37.255 |
| H | 43.356 | 29.685 | 36.877 |
| H | 41.947 | 29.131 | 36.855 |
| O | 46.29  | 23.127 | 45.308 |
| H | 45.39  | 23.212 | 44.991 |
| H | 46.296 | 22.302 | 45.794 |
| O | 37.668 | 32.824 | 41.75  |
| H | 37.857 | 31.891 | 41.651 |
| H | 38.323 | 33.136 | 42.374 |
| O | 45.062 | 12.013 | 24.446 |
| H | 44.4   | 12.582 | 24.839 |
| H | 44.66  | 11.144 | 24.446 |
| O | 40.972 | 26.16  | 44.336 |
| H | 41.76  | 26.171 | 43.792 |
| H | 40.773 | 27.084 | 44.487 |
| O | 41.357 | 19.237 | 42.017 |
| H | 41.44  | 19.978 | 41.417 |
| H | 40.555 | 19.414 | 42.508 |
| O | 36.988 | 27.95  | 39.504 |
| H | 37.498 | 27.354 | 40.052 |
| H | 36.1   | 27.9   | 39.858 |
| O | 46.669 | 10.13  | 46.572 |
| H | 46.303 | 10.584 | 45.814 |
| H | 47.617 | 10.181 | 46.447 |
| O | 33.512 | 12.721 | 35.83  |
| H | 32.868 | 12.523 | 36.509 |
| H | 33.52  | 13.677 | 35.779 |
| O | 43.324 | 11.785 | 45.942 |
| H | 43.41  | 11.777 | 46.895 |
| H | 43.522 | 12.688 | 45.691 |
| O | 44.038 | 14.257 | 45.445 |
| H | 44.937 | 14.437 | 45.722 |
| H | 43.698 | 15.108 | 45.167 |
| O | 40.148 | 12.409 | 48.764 |
| H | 40.769 | 12.723 | 49.421 |
| H | 39.365 | 12.942 | 48.9   |
| O | 40.294 | 9.027  | 36.038 |

|   |        |        |        |
|---|--------|--------|--------|
| H | 40.005 | 8.728  | 36.9   |
| H | 39.483 | 9.17   | 35.549 |
| O | 38.741 | 15.326 | 37.697 |
| H | 37.932 | 15.022 | 38.11  |
| H | 38.469 | 16.063 | 37.15  |
| O | 39.032 | 19.81  | 32.156 |
| H | 39.065 | 19.723 | 31.203 |
| H | 38.5   | 20.591 | 32.307 |
| O | 36.856 | 20.875 | 35.4   |
| H | 36.919 | 21.239 | 34.517 |
| H | 36.62  | 19.958 | 35.264 |
| O | 30.625 | 14.663 | 51.805 |
| H | 29.775 | 14.322 | 51.524 |
| H | 30.651 | 14.494 | 52.747 |
| O | 37.749 | 13.711 | 48.848 |
| H | 37.862 | 14.643 | 49.037 |
| H | 36.969 | 13.459 | 49.344 |
| O | 37.815 | 10.813 | 39.36  |
| H | 38.561 | 11.126 | 38.849 |
| H | 37.908 | 11.246 | 40.209 |
| O | 44.83  | 16.135 | 39.301 |
| H | 45.554 | 15.858 | 38.74  |
| H | 44.268 | 15.363 | 39.365 |
| O | 42.725 | 11.139 | 40.669 |
| H | 42.624 | 11.234 | 41.616 |
| H | 43.468 | 11.701 | 40.45  |
| O | 44.061 | 26.438 | 36.54  |
| H | 43.372 | 27.067 | 36.755 |
| H | 43.589 | 25.642 | 36.292 |
| O | 50.933 | 25.049 | 41.684 |
| H | 50.112 | 25.503 | 41.494 |
| H | 50.956 | 24.324 | 41.059 |
| O | 43.92  | 27.028 | 33.076 |
| H | 43.078 | 26.915 | 33.516 |
| H | 43.712 | 27.531 | 32.288 |
| O | 43.618 | 17.249 | 45.578 |
| H | 42.966 | 17.112 | 44.89  |
| H | 43.417 | 18.117 | 45.929 |
| O | 43.724 | 15.807 | 35.704 |
| H | 43.305 | 16.607 | 36.022 |
| H | 44.15  | 16.068 | 34.888 |
| O | 41.122 | 14.386 | 37.312 |
| H | 41.719 | 15.103 | 37.099 |
| H | 40.268 | 14.807 | 37.411 |
| O | 41.134 | 18.874 | 46.979 |
| H | 41.328 | 18.085 | 47.485 |
| H | 40.26  | 18.72  | 46.621 |

|   |        |        |        |
|---|--------|--------|--------|
| O | 44.887 | 26.655 | 40.974 |
| H | 45.044 | 27.594 | 40.874 |
| H | 45.558 | 26.364 | 41.592 |
| O | 43.672 | 25.635 | 50.955 |
| H | 43.536 | 25.081 | 50.186 |
| H | 44.377 | 26.23  | 50.699 |
| O | 38.114 | 30.425 | 39.227 |
| H | 37.675 | 29.581 | 39.325 |
| H | 38.688 | 30.487 | 39.99  |
| O | 48.761 | 33.412 | 28.7   |
| H | 48.191 | 32.665 | 28.518 |
| H | 49.423 | 33.383 | 28.009 |
| O | 42.167 | 26.476 | 48.158 |
| H | 42.216 | 25.633 | 48.609 |
| H | 41.263 | 26.531 | 47.849 |
| O | 44.079 | 18.227 | 53.322 |
| H | 43.17  | 18.433 | 53.538 |
| H | 44.569 | 18.444 | 54.115 |
| O | 24.093 | 10.477 | 46.846 |
| H | 24.376 | 9.733  | 46.313 |
| H | 23.746 | 10.08  | 47.645 |
| O | 32.948 | 11.508 | 44.481 |
| H | 32.984 | 11.2   | 45.386 |
| H | 33.612 | 12.196 | 44.435 |
| O | 38.586 | 17.424 | 52.968 |
| H | 37.973 | 17.964 | 52.469 |
| H | 39.451 | 17.701 | 52.666 |
| O | 39.352 | 19.493 | 43.79  |
| H | 39.547 | 18.992 | 44.582 |
| H | 38.923 | 20.287 | 44.109 |
| O | 40.995 | 11.465 | 31.507 |
| H | 40.886 | 11.994 | 32.297 |
| H | 40.868 | 10.563 | 31.803 |
| O | 38.799 | 14.62  | 32.857 |
| H | 38.248 | 14.187 | 32.204 |
| H | 38.776 | 14.036 | 33.615 |
| O | 44.971 | 23.908 | 39.738 |
| H | 44.333 | 23.544 | 40.352 |
| H | 44.621 | 24.769 | 39.512 |
| O | 46.006 | 25.042 | 23.693 |
| H | 45.881 | 25.443 | 24.554 |
| H | 45.849 | 25.753 | 23.073 |
| O | 46.119 | 24.262 | 36.729 |
| H | 45.577 | 25.035 | 36.887 |
| H | 45.955 | 24.039 | 35.813 |
| O | 47.467 | 18.467 | 35.207 |
| H | 47.771 | 19.374 | 35.24  |



|   |        |        |        |
|---|--------|--------|--------|
| H | 47.119 | 18.3   | 36.083 |
| O | 39.617 | 29.268 | 44.815 |
| H | 38.797 | 29.587 | 44.439 |
| H | 39.484 | 29.322 | 45.762 |
| O | 48.134 | 23.777 | 30.214 |
| H | 48.341 | 23.387 | 31.064 |
| H | 48.308 | 24.711 | 30.33  |
| O | 48.973 | 21.31  | 35.033 |
| H | 49.376 | 20.85  | 35.769 |
| H | 49.442 | 22.144 | 34.986 |
| O | 41.684 | 16.941 | 43.549 |
| H | 41.508 | 17.466 | 42.768 |
| H | 40.819 | 16.755 | 43.913 |
| O | 44.381 | 14.96  | 49.026 |
| H | 44.461 | 15.494 | 49.816 |
| H | 45.269 | 14.927 | 48.669 |
| O | 45.213 | 21.496 | 37.473 |
| H | 45.305 | 22.323 | 36.999 |
| H | 46.103 | 21.146 | 37.519 |
| O | 44.425 | 19.678 | 34.25  |
| H | 44.272 | 20.623 | 34.216 |
| H | 44.393 | 19.398 | 33.335 |
| O | 29.246 | 10.999 | 46.509 |
| H | 29.013 | 10.1   | 46.738 |
| H | 28.437 | 11.496 | 46.631 |
| O | 43.546 | 18.611 | 36.572 |
| H | 42.752 | 19.137 | 36.672 |
| H | 43.975 | 18.971 | 35.796 |
| O | 46.952 | 13.27  | 47.144 |
| H | 47.756 | 13.507 | 46.681 |
| H | 46.713 | 12.415 | 46.788 |
| O | 45.373 | 13.611 | 29.92  |
| H | 45.995 | 13.653 | 30.646 |
| H | 45.787 | 13.029 | 29.282 |
| O | 46.514 | 16.356 | 30.105 |
| H | 45.834 | 15.682 | 30.1   |
| H | 47.297 | 15.909 | 29.783 |
| O | 47.714 | 28.143 | 32.951 |
| H | 46.988 | 28.687 | 32.647 |
| H | 48.07  | 28.616 | 33.703 |
| O | 33.599 | 12.445 | 48.59  |
| H | 33.016 | 12.371 | 49.346 |
| H | 33.417 | 11.663 | 48.07  |
| O | 40.986 | 10.998 | 54.892 |
| H | 40.192 | 11.327 | 54.471 |
| H | 41.702 | 11.377 | 54.382 |
| O | 44.087 | 17.544 | 50.773 |

|   |        |        |        |
|---|--------|--------|--------|
| H | 44.924 | 17.971 | 50.591 |
| H | 43.948 | 17.678 | 51.71  |
| O | 45.931 | 28.123 | 37.549 |
| H | 45.498 | 28.767 | 38.11  |
| H | 45.214 | 27.616 | 37.169 |
| O | 24.541 | 12.586 | 43.627 |
| H | 24.815 | 11.799 | 43.156 |
| H | 23.619 | 12.432 | 43.833 |
| O | 36.582 | 15.048 | 39.267 |
| H | 36.006 | 14.432 | 39.721 |
| H | 36.644 | 15.798 | 39.858 |
| O | 39.675 | 13.194 | 51.872 |
| H | 39.359 | 13.054 | 52.765 |
| H | 40.594 | 13.442 | 51.979 |
| O | 40.128 | 29.635 | 37.006 |
| H | 39.307 | 30.036 | 36.719 |
| H | 40.145 | 29.778 | 37.952 |
| O | 39.369 | 14.26  | 42.738 |
| H | 39.619 | 14.495 | 41.845 |
| H | 40.027 | 13.619 | 43.01  |
| O | 45.809 | 17.353 | 43.926 |
| H | 45.254 | 17.365 | 44.705 |
| H | 45.232 | 17.637 | 43.217 |
| O | 43.977 | 17.981 | 41.565 |
| H | 44.456 | 17.432 | 40.944 |
| H | 43.222 | 18.3   | 41.069 |
| O | 51.767 | 11.21  | 38.734 |
| H | 51.593 | 11.907 | 39.366 |
| H | 52.715 | 11.234 | 38.605 |
| O | 45.054 | 11.568 | 35.495 |
| H | 44.682 | 12.343 | 35.074 |
| H | 44.37  | 11.269 | 36.094 |
| O | 37.077 | 11.888 | 33.253 |
| H | 37.243 | 12.419 | 32.474 |
| H | 36.128 | 11.926 | 33.372 |
| O | 46.231 | 32.707 | 37.235 |
| H | 46.879 | 32.964 | 36.578 |
| H | 46.029 | 33.517 | 37.702 |
| O | 35.469 | 12.392 | 44.739 |
| H | 35.98  | 12.89  | 44.1   |
| H | 35.938 | 12.51  | 45.565 |
| O | 39.972 | 6.075  | 44.844 |
| H | 39.331 | 6.449  | 44.239 |
| H | 39.462 | 5.852  | 45.623 |
| O | 41.944 | 31.079 | 50.292 |
| H | 41.335 | 30.583 | 50.839 |
| H | 42.121 | 30.503 | 49.548 |

|   |        |        |        |
|---|--------|--------|--------|
| O | 42.058 | 18.95  | 19.483 |
| H | 41.115 | 18.81  | 19.399 |
| H | 42.347 | 18.274 | 20.097 |
| O | 41.201 | 14.172 | 19.749 |
| H | 41.965 | 13.608 | 19.63  |
| H | 40.473 | 13.565 | 19.884 |
| O | 37.538 | 15.386 | 10.576 |
| H | 37.371 | 14.968 | 11.421 |
| H | 37.04  | 14.864 | 9.947  |
| O | 38.38  | 20.142 | 13.366 |
| H | 38.646 | 19.241 | 13.182 |
| H | 39.104 | 20.677 | 13.04  |
| O | 41.038 | 21.255 | 28.921 |
| H | 41.426 | 21.097 | 29.781 |
| H | 40.237 | 20.731 | 28.919 |
| O | 36.494 | 12.369 | 28.217 |
| H | 36.214 | 11.457 | 28.145 |
| H | 37.391 | 12.372 | 27.885 |
| O | 45.316 | 26.616 | 12.705 |
| H | 45.278 | 27.222 | 11.965 |
| H | 44.756 | 27.015 | 13.371 |
| O | 45.833 | 22.446 | 24.239 |
| H | 45.825 | 23.384 | 24.046 |
| H | 46.326 | 22.057 | 23.516 |
| O | 38.295 | 13.155 | 21.468 |
| H | 37.792 | 13.709 | 20.871 |
| H | 37.706 | 13.002 | 22.207 |
| O | 44.397 | 23.913 | 11.598 |
| H | 44.413 | 24.514 | 10.852 |
| H | 43.546 | 24.063 | 12.008 |
| O | 39.101 | 24.07  | 15.268 |
| H | 38.825 | 24.339 | 16.144 |
| H | 39.682 | 23.325 | 15.418 |
| O | 40.035 | 22.066 | 20.255 |
| H | 39.217 | 22.114 | 19.76  |
| H | 40.703 | 22.379 | 19.645 |
| O | 48.093 | 19.697 | 28.663 |
| H | 48.574 | 19.386 | 29.43  |
| H | 47.694 | 18.909 | 28.294 |
| O | 41.692 | 25.704 | 16.215 |
| H | 41.662 | 26.629 | 16.46  |
| H | 41.209 | 25.256 | 16.91  |
| O | 49.653 | 23.254 | 15.48  |
| H | 49.216 | 23.517 | 16.29  |
| H | 50.234 | 23.985 | 15.273 |
| O | 44.988 | 14.55  | 14.314 |
| H | 44.039 | 14.655 | 14.245 |

|   |        |        |        |
|---|--------|--------|--------|
| H | 45.344 | 15.159 | 13.667 |
| O | 47.3   | 31.074 | 27.843 |
| H | 46.887 | 30.236 | 28.05  |
| H | 47.25  | 31.138 | 26.89  |
| O | 43.499 | 27.959 | 14.397 |
| H | 43.062 | 28.116 | 15.235 |
| H | 43.182 | 28.66  | 13.828 |
| O | 43.367 | 20.548 | 31.039 |
| H | 43.237 | 21.177 | 31.749 |
| H | 44.204 | 20.797 | 30.648 |
| O | 40.752 | 7.417  | 18.811 |
| H | 41.699 | 7.549  | 18.779 |
| H | 40.623 | 6.778  | 19.512 |
| O | 40.052 | 16.014 | 17.193 |
| H | 40.981 | 15.792 | 17.136 |
| H | 39.643 | 15.235 | 17.572 |
| O | 37.983 | 21.963 | 18.502 |
| H | 37.917 | 21.1   | 18.094 |
| H | 38.325 | 22.529 | 17.81  |
| O | 42.739 | 22.994 | 14.868 |
| H | 43.246 | 23.364 | 15.59  |
| H | 43.234 | 22.221 | 14.598 |
| O | 44.39  | 9.462  | 23.721 |
| H | 43.664 | 8.877  | 23.505 |
| H | 44.905 | 9.51   | 22.916 |
| O | 34.073 | 11.577 | 21.282 |
| H | 34.895 | 11.097 | 21.378 |
| H | 34.266 | 12.255 | 20.635 |
| O | 39.214 | 16.897 | 21.288 |
| H | 40.161 | 16.861 | 21.153 |
| H | 38.943 | 17.715 | 20.871 |
| O | 40.225 | 18.183 | 15.779 |
| H | 40.158 | 17.948 | 14.853 |
| H | 40.065 | 17.363 | 16.246 |
| O | 42.738 | 12.799 | 29.362 |
| H | 42.3   | 12.313 | 30.061 |
| H | 43.621 | 12.955 | 29.695 |
| O | 28.731 | 14.263 | 17.984 |
| H | 28.356 | 13.95  | 18.807 |
| H | 29.299 | 14.99  | 18.241 |
| O | 39.742 | 7.92   | 13.649 |
| H | 39.85  | 8.863  | 13.774 |
| H | 39.332 | 7.616  | 14.459 |
| O | 41.631 | 22.32  | 18.135 |
| H | 42.212 | 23.073 | 18.022 |
| H | 42.008 | 21.64  | 17.578 |
| O | 41.088 | 26.34  | 13.611 |

|   |        |        |        |
|---|--------|--------|--------|
| H | 41.068 | 25.63  | 14.252 |
| H | 41.809 | 26.901 | 13.898 |
| O | 46.831 | 20.051 | 13.163 |
| H | 47.227 | 20.768 | 12.669 |
| H | 46.593 | 20.442 | 14.004 |
| O | 45.346 | 22.78  | 26.776 |
| H | 44.67  | 23.456 | 26.73  |
| H | 45.498 | 22.531 | 25.865 |
| O | 45.57  | 30.581 | 14.732 |
| H | 46.523 | 30.591 | 14.818 |
| H | 45.413 | 30.663 | 13.791 |
| O | 38.536 | 20.533 | 16.021 |
| H | 39.077 | 19.743 | 16.043 |
| H | 38.39  | 20.698 | 15.09  |
| O | 34.117 | 7.457  | 16.474 |
| H | 33.897 | 7.683  | 15.57  |
| H | 33.954 | 6.515  | 16.531 |
| O | 40.097 | 24.815 | 6.454  |
| H | 39.189 | 24.516 | 6.412  |
| H | 40.151 | 25.303 | 7.276  |
| O | 46.256 | 24.444 | 18.988 |
| H | 47.108 | 24.434 | 18.551 |
| H | 46.427 | 24.857 | 19.834 |
| O | 36.938 | 19.16  | 18.062 |
| H | 37.282 | 19.447 | 17.216 |
| H | 36.762 | 18.227 | 17.945 |
| O | 42.571 | 26.022 | 10.835 |
| H | 42.719 | 26.326 | 11.73  |
| H | 41.719 | 26.387 | 10.596 |
| O | 39.111 | 19.234 | 19.784 |
| H | 39.13  | 20.164 | 20.007 |
| H | 38.486 | 19.174 | 19.061 |
| O | 44.157 | 10.39  | 16.767 |
| H | 44.055 | 11.341 | 16.816 |
| H | 44.86  | 10.257 | 16.132 |
| O | 35.562 | 15.037 | 15.538 |
| H | 35.026 | 14.273 | 15.751 |
| H | 36.314 | 14.678 | 15.068 |
| O | 44.823 | 20.887 | 15.714 |
| H | 45.615 | 20.457 | 16.034 |
| H | 44.121 | 20.533 | 16.26  |
| O | 47.703 | 26.886 | 20.285 |
| H | 47.709 | 27.731 | 19.836 |
| H | 48.581 | 26.806 | 20.658 |
| O | 40.694 | 30.32  | 9.354  |
| H | 39.939 | 29.986 | 8.868  |
| H | 40.628 | 31.271 | 9.274  |

|   |        |        |        |
|---|--------|--------|--------|
| O | 45.273 | 26.612 | 16.645 |
| H | 45.501 | 25.729 | 16.356 |
| H | 44.692 | 26.946 | 15.962 |
| O | 51.594 | 21.532 | 14.729 |
| H | 50.913 | 22.156 | 14.979 |
| H | 52.24  | 22.058 | 14.256 |
| O | 39.395 | 17.354 | 10.386 |
| H | 39.063 | 17.83  | 9.625  |
| H | 38.752 | 16.661 | 10.534 |
| O | 41.985 | 16.318 | 10.433 |
| H | 41.065 | 16.461 | 10.209 |
| H | 42.398 | 17.172 | 10.304 |
| O | 24.893 | 15.299 | 11.539 |
| H | 25.456 | 14.944 | 12.227 |
| H | 25.499 | 15.72  | 10.928 |
| O | 38.709 | 25.161 | 12.814 |
| H | 38.842 | 24.725 | 13.656 |
| H | 39.358 | 25.866 | 12.804 |
| O | 54.404 | 18.308 | 15.805 |
| H | 54.647 | 18.867 | 15.068 |
| H | 54.986 | 18.58  | 16.515 |
| O | 53.594 | 26.809 | 17.416 |
| H | 54.24  | 26.702 | 18.114 |
| H | 54.097 | 27.139 | 16.671 |
| O | 44.32  | 27.38  | 19.521 |
| H | 44.984 | 27.349 | 18.833 |
| H | 43.707 | 28.056 | 19.232 |
| O | 53.808 | 21.953 | 8.881  |
| H | 54.137 | 21.196 | 9.366  |
| H | 53.006 | 22.202 | 9.342  |
| O | 40.117 | 23.732 | 9.24   |
| H | 40.965 | 23.29  | 9.277  |
| H | 39.576 | 23.266 | 9.877  |
| O | 49.907 | 24.6   | 12.842 |
| H | 49.009 | 24.583 | 13.174 |
| H | 50.409 | 25.033 | 13.532 |
| O | 42.132 | 19.46  | 16.825 |
| H | 41.267 | 19.229 | 16.486 |
| H | 42.097 | 19.222 | 17.751 |
| O | 29.065 | 9.224  | 18.684 |
| H | 28.626 | 8.378  | 18.77  |
| H | 29.259 | 9.299  | 17.75  |
| O | 45.785 | 21.43  | 20.328 |
| H | 46.091 | 22.269 | 19.985 |
| H | 46.503 | 20.822 | 20.151 |
| O | 40.311 | 17.308 | 13.087 |
| H | 40.963 | 16.609 | 13.115 |

|   |        |        |        |
|---|--------|--------|--------|
| H | 39.995 | 17.305 | 12.184 |
| O | 42.857 | 12.807 | 17.183 |
| H | 42.9   | 13.683 | 17.566 |
| H | 42.543 | 12.951 | 16.291 |
| O | 41.183 | 11.659 | 24.456 |
| H | 41.3   | 11.252 | 25.314 |
| H | 41.289 | 12.596 | 24.618 |
| O | 41.272 | 14.671 | 12.579 |
| H | 41.504 | 14.951 | 11.694 |
| H | 41.265 | 13.715 | 12.535 |
| O | 45.843 | 12.94  | 7.375  |
| H | 45.059 | 13.217 | 7.85   |
| H | 45.762 | 11.988 | 7.313  |
| O | 48.454 | 28.075 | 12.72  |
| H | 47.567 | 27.799 | 12.491 |
| H | 49.018 | 27.389 | 12.364 |
| O | 32.176 | 11.268 | 25.78  |
| H | 32.09  | 10.316 | 25.721 |
| H | 31.717 | 11.5   | 26.587 |
| O | 43.796 | 31.449 | 19.368 |
| H | 44.572 | 31.396 | 19.925 |
| H | 43.379 | 30.592 | 19.455 |
| O | 50.027 | 10.71  | 20.46  |
| H | 50.816 | 10.415 | 20.005 |
| H | 50.238 | 10.618 | 21.389 |
| O | 35.99  | 12.972 | 23.269 |
| H | 35.993 | 13.689 | 23.903 |
| H | 35.605 | 12.235 | 23.743 |
| O | 45.29  | 10.377 | 21.312 |
| H | 45.549 | 9.916  | 20.514 |
| H | 44.928 | 11.207 | 21.002 |
| O | 41.608 | 19.693 | 12.099 |
| H | 42.198 | 19.278 | 11.469 |
| H | 41.19  | 18.962 | 12.553 |
| O | 24.813 | 9.78   | 21.566 |
| H | 25.033 | 9.348  | 20.74  |
| H | 24.117 | 10.395 | 21.336 |
| O | 33.478 | 16.269 | 17.678 |
| H | 33.205 | 15.361 | 17.809 |
| H | 33.037 | 16.538 | 16.872 |
| O | 40.427 | 11.406 | 16.801 |
| H | 39.736 | 11.383 | 17.463 |
| H | 41.205 | 11.697 | 17.276 |
| O | 43.221 | 16.189 | 18.087 |
| H | 44.165 | 16.338 | 18.033 |
| H | 42.948 | 16.664 | 18.872 |
| O | 33.454 | 15.843 | 12.269 |

|   |        |        |        |
|---|--------|--------|--------|
| H | 33.527 | 14.915 | 12.046 |
| H | 32.919 | 16.217 | 11.57  |
| O | 44.568 | 18.363 | 12.644 |
| H | 45.362 | 18.856 | 12.85  |
| H | 44.115 | 18.279 | 13.483 |
| O | 46.175 | 23.272 | 15.71  |
| H | 46.986 | 22.831 | 15.962 |
| H | 45.557 | 22.56  | 15.542 |
| O | 40.087 | 13.749 | 29.131 |
| H | 41.01  | 13.594 | 29.332 |
| H | 40.099 | 14.232 | 28.305 |
| O | 45.613 | 3.911  | 33.019 |
| H | 45.448 | 2.974  | 33.121 |
| H | 44.793 | 4.329  | 33.283 |
| O | 50.342 | 19.594 | -1.238 |
| H | 49.774 | 19.378 | -0.498 |
| H | 51.226 | 19.397 | -0.928 |
| O | 34.506 | 20.248 | 1.814  |
| H | 33.825 | 20.898 | 1.991  |
| H | 34.443 | 19.631 | 2.543  |
| O | 37.958 | 25.166 | 1.773  |
| H | 38.335 | 24.954 | 2.627  |
| H | 37.645 | 24.328 | 1.434  |
| O | 42.946 | 30.381 | 3.704  |
| H | 43.131 | 30.85  | 2.89   |
| H | 43.459 | 29.576 | 3.638  |
| O | 34.424 | 25.088 | -0.418 |
| H | 35.347 | 24.924 | -0.229 |
| H | 33.951 | 24.483 | 0.153  |
| O | 22.371 | 27.19  | 2.405  |
| H | 23.104 | 26.607 | 2.602  |
| H | 22.758 | 28.066 | 2.394  |
| O | 41.225 | 36.746 | 1.333  |
| H | 40.549 | 36.273 | 1.818  |
| H | 41.859 | 37.009 | 2      |
| O | 41.947 | 27.942 | 2.119  |
| H | 42.827 | 28.049 | 2.478  |
| H | 42.082 | 27.86  | 1.175  |
| O | 32.492 | 15.407 | 3.286  |
| H | 33.359 | 15.812 | 3.319  |
| H | 32.362 | 15.048 | 4.163  |
| O | 34.35  | 23.425 | 4.759  |
| H | 35.117 | 22.857 | 4.689  |
| H | 34.399 | 23.785 | 5.645  |
| O | 28.847 | 25.551 | 4.498  |
| H | 29.463 | 25.973 | 3.898  |
| H | 29.401 | 25.044 | 5.091  |



|   |        |        |        |
|---|--------|--------|--------|
| O | 37.179 | 20.472 | -1.826 |
| H | 37.574 | 20.705 | -0.986 |
| H | 37.061 | 19.524 | -1.781 |
| O | 46.601 | 17.062 | 2.509  |
| H | 46.42  | 16.564 | 1.711  |
| H | 45.753 | 17.429 | 2.759  |
| O | 34.714 | -2.104 | 8.64   |
| H | 35.059 | -1.223 | 8.782  |
| H | 33.771 | -2.018 | 8.781  |
| O | 37.645 | 23.587 | 7.237  |
| H | 37.897 | 23.511 | 8.157  |
| H | 37.007 | 22.886 | 7.105  |
| O | 45.848 | 19.411 | -4.075 |
| H | 46.048 | 18.918 | -3.279 |
| H | 46.546 | 20.063 | -4.134 |
| O | 29.352 | 14.273 | 9.134  |
| H | 29.439 | 14.76  | 9.954  |
| H | 28.46  | 13.927 | 9.155  |
| O | 39.471 | 28.906 | 2.501  |
| H | 40.315 | 28.482 | 2.351  |
| H | 39.183 | 28.572 | 3.351  |
| O | 37.704 | 33.049 | 9.076  |
| H | 37.329 | 32.563 | 9.81   |
| H | 38.625 | 33.165 | 9.311  |
| O | 53.159 | 21.143 | -2.332 |
| H | 53.104 | 22.052 | -2.036 |
| H | 53.978 | 20.818 | -1.956 |
| O | 36.021 | 16.821 | 8.639  |
| H | 36.907 | 17.123 | 8.837  |
| H | 36.146 | 16.085 | 8.04   |
| O | 40.843 | 33.263 | 1.936  |
| H | 41.529 | 33.759 | 2.384  |
| H | 40.039 | 33.748 | 2.119  |
| O | 43.176 | 31.296 | 11.582 |
| H | 42.702 | 30.84  | 10.886 |
| H | 44.087 | 31.022 | 11.47  |
| O | 38.586 | 17.558 | 7.62   |
| H | 39.007 | 18.398 | 7.438  |
| H | 39.104 | 16.92  | 7.129  |
| O | 40.325 | 26.457 | 9.305  |
| H | 40.46  | 25.541 | 9.545  |
| H | 39.497 | 26.695 | 9.724  |
| O | 30.214 | 19.395 | 1.061  |
| H | 29.941 | 20.085 | 0.457  |
| H | 30.689 | 18.77  | 0.512  |
| O | 40.014 | 23.649 | -0.068 |
| H | 39.511 | 23.759 | -0.875 |

|   |        |        |        |
|---|--------|--------|--------|
| H | 40.918 | 23.838 | -0.322 |
| O | 34.081 | 19.01  | -0.637 |
| H | 34.931 | 18.691 | -0.938 |
| H | 34.293 | 19.661 | 0.033  |
| O | 47.522 | 27.671 | 9.251  |
| H | 47.912 | 27.005 | 9.818  |
| H | 48.27  | 28.115 | 8.853  |
| O | 36.734 | 21.195 | 11.47  |
| H | 37.494 | 21.662 | 11.124 |
| H | 37.051 | 20.784 | 12.275 |
| O | 35.342 | 27.863 | 12.21  |
| H | 35.593 | 27.289 | 12.933 |
| H | 36.144 | 27.967 | 11.697 |
| O | 41.778 | 29.618 | 13.263 |
| H | 42.026 | 30.328 | 12.671 |
| H | 40.824 | 29.675 | 13.319 |
| O | 34.478 | 25.065 | 6.902  |
| H | 34.886 | 25.427 | 7.688  |
| H | 33.693 | 25.597 | 6.772  |
| O | 47.814 | 25.988 | 1.364  |
| H | 47.983 | 25.595 | 0.508  |
| H | 47.652 | 25.242 | 1.942  |
| O | 40.326 | 30.72  | 0.826  |
| H | 40.582 | 31.514 | 1.295  |
| H | 40.185 | 30.07  | 1.515  |
| O | 53.168 | 18.206 | 2.843  |
| H | 54.01  | 18.609 | 2.63   |
| H | 52.527 | 18.9   | 2.693  |
| O | 31.885 | 26.023 | 6.535  |
| H | 31.82  | 25.284 | 5.93   |
| H | 32.106 | 26.77  | 5.979  |
| O | 33.451 | 11.454 | -1.961 |
| H | 32.966 | 11.004 | -1.27  |
| H | 32.778 | 11.739 | -2.579 |
| O | 43.928 | 15.726 | 0.942  |
| H | 43.173 | 15.607 | 0.366  |
| H | 44.015 | 16.675 | 1.03   |
| O | 44.656 | 15.825 | 5.607  |
| H | 44.802 | 14.985 | 5.172  |
| H | 43.847 | 16.158 | 5.218  |
| O | 40.533 | 15.818 | 6.653  |
| H | 40.822 | 15.31  | 7.411  |
| H | 40.378 | 15.164 | 5.971  |
| O | 38.582 | 14.859 | 4.114  |
| H | 39.1   | 14.111 | 4.413  |
| H | 37.718 | 14.492 | 3.928  |
| O | 31.947 | 15.776 | 10.003 |

|   |        |        |        |
|---|--------|--------|--------|
| H | 31.454 | 16.009 | 9.216  |
| H | 31.974 | 14.819 | 9.994  |
| O | 36.477 | 15.238 | 6.404  |
| H | 37.161 | 15.748 | 5.971  |
| H | 36.118 | 14.683 | 5.712  |
| O | 29.477 | 18.666 | 8.755  |
| H | 29.332 | 18.052 | 8.035  |
| H | 29.473 | 19.528 | 8.338  |
| O | 36.056 | 13.843 | 3.802  |
| H | 35.644 | 13.215 | 3.208  |
| H | 35.605 | 14.669 | 3.627  |
| O | 29.15  | 10.551 | 7.64   |
| H | 29.287 | 10.1   | 8.473  |
| H | 29.743 | 11.302 | 7.674  |
| O | 28.05  | 8.645  | -6.362 |
| H | 27.714 | 8.263  | -5.551 |
| H | 27.713 | 8.075  | -7.053 |
| O | 31.415 | 16.07  | 7.13   |
| H | 31.975 | 16.771 | 7.465  |
| H | 30.524 | 16.394 | 7.258  |
| O | 43.016 | 11.256 | 2.847  |
| H | 42.864 | 12.119 | 2.461  |
| H | 42.656 | 11.321 | 3.731  |
| O | 35.135 | 26.291 | 9.339  |
| H | 35.737 | 26.936 | 9.71   |
| H | 35.335 | 25.479 | 9.805  |
| O | 40.425 | 19.783 | 7.287  |
| H | 41.128 | 19.282 | 6.873  |
| H | 40.586 | 20.688 | 7.02   |
| O | 34.917 | 18.57  | 6.875  |
| H | 34.983 | 18.024 | 7.659  |
| H | 33.976 | 18.642 | 6.712  |
| O | 44.515 | 27.989 | 3.039  |
| H | 44.763 | 27.259 | 3.607  |
| H | 45.324 | 28.225 | 2.585  |
| O | 46.889 | 22.31  | 11.571 |
| H | 47.382 | 23.084 | 11.843 |
| H | 45.982 | 22.61  | 11.514 |
| O | 34.63  | 18.543 | 4.174  |
| H | 33.697 | 18.661 | 4.352  |
| H | 34.985 | 18.187 | 4.989  |
| O | 32.274 | 18.498 | 7.946  |
| H | 32.312 | 18.614 | 8.895  |
| H | 31.823 | 19.28  | 7.627  |
| O | 41.552 | 22.275 | 6.933  |
| H | 41.007 | 23.06  | 6.88   |
| H | 42.048 | 22.382 | 7.745  |

|   |        |        |        |
|---|--------|--------|--------|
| O | 43.323 | 22.586 | 9.142  |
| H | 43.584 | 22.593 | 10.063 |
| H | 44.112 | 22.849 | 8.668  |
| O | 43.401 | 17.229 | -2.44  |
| H | 42.937 | 18.013 | -2.732 |
| H | 43.935 | 17.527 | -1.704 |
| O | 37.459 | 20.624 | 5.1    |
| H | 37.318 | 20.104 | 5.891  |
| H | 37.198 | 20.045 | 4.384  |
| O | 39.45  | 31.218 | 4.349  |
| H | 39.723 | 31.456 | 5.235  |
| H | 40.263 | 31.208 | 3.842  |
| O | 44.441 | 25.626 | 8.832  |
| H | 44.738 | 26.42  | 8.386  |
| H | 43.628 | 25.885 | 9.265  |
| O | 35.548 | 8.845  | 8.952  |
| H | 36.372 | 9.332  | 8.989  |
| H | 35.102 | 9.189  | 8.178  |
| O | 28.47  | 27.344 | 11.114 |
| H | 29.212 | 27.726 | 11.582 |
| H | 28.44  | 27.819 | 10.284 |
| O | 36.961 | 34.498 | 7.007  |
| H | 37.255 | 35.373 | 7.259  |
| H | 37.33  | 33.92  | 7.675  |
| O | 32.802 | 12.313 | 3.968  |
| H | 32.932 | 12.963 | 4.659  |
| H | 32.516 | 11.525 | 4.43   |
| O | 28.896 | 11.832 | 3.564  |
| H | 29.037 | 12.743 | 3.823  |
| H | 28.364 | 11.463 | 4.269  |
| O | 43.481 | 14.081 | 2.857  |
| H | 43.731 | 14.845 | 2.338  |
| H | 44.313 | 13.705 | 3.145  |
| O | 43.013 | 21.778 | 1.473  |
| H | 42.938 | 21.431 | 2.362  |
| H | 42.171 | 21.575 | 1.065  |
| O | 48.507 | 21.134 | -5.569 |
| H | 49.215 | 21.205 | -6.209 |
| H | 48.95  | 20.945 | -4.741 |
| O | 33.157 | 30.774 | 2.35   |
| H | 33.63  | 31.594 | 2.211  |
| H | 33.809 | 30.091 | 2.191  |
| O | 37.596 | 28.437 | 10.59  |
| H | 37.073 | 29.157 | 10.236 |
| H | 38.295 | 28.868 | 11.082 |
| O | 45.214 | 34.454 | 10.32  |
| H | 45.853 | 35.105 | 10.607 |

|   |        |        |        |
|---|--------|--------|--------|
| H | 44.955 | 34.002 | 11.123 |
| O | 33.012 | 22.073 | 7.568  |
| H | 33.72  | 21.495 | 7.853  |
| H | 33.41  | 22.628 | 6.898  |
| O | 38.79  | 29.639 | 12.856 |
| H | 38.326 | 30.454 | 12.664 |
| H | 38.311 | 29.257 | 13.591 |
| O | 49.751 | 26.497 | 10.851 |
| H | 50.338 | 27.078 | 10.368 |
| H | 50.328 | 26.001 | 11.432 |
| O | 42.384 | 19.013 | 9.644  |
| H | 41.947 | 19.429 | 8.902  |
| H | 43.316 | 19.052 | 9.426  |
| O | 33.28  | 14.634 | 5.896  |
| H | 34.019 | 14.699 | 6.501  |
| H | 32.531 | 14.957 | 6.398  |
| O | 50.54  | 14.443 | 7.097  |
| H | 49.966 | 14.275 | 7.845  |
| H | 49.984 | 14.902 | 6.468  |
| O | 38.962 | 22.789 | 11.744 |
| H | 38.836 | 23.723 | 11.907 |
| H | 39.9   | 22.647 | 11.873 |
| O | 33.678 | 13.177 | 11.289 |
| H | 33.228 | 12.336 | 11.371 |
| H | 34.608 | 12.955 | 11.313 |
| O | 51.437 | 18.389 | 8.492  |
| H | 50.543 | 18.05  | 8.536  |
| H | 51.802 | 18     | 7.698  |
| O | 30.917 | 36.654 | 1.234  |
| H | 30.117 | 36.927 | 1.682  |
| H | 31.025 | 37.29  | 0.527  |
| O | 32.444 | 6.485  | 8.862  |
| H | 31.645 | 6.822  | 8.456  |
| H | 33.059 | 6.386  | 8.135  |
| O | 47.37  | 17.66  | 11.396 |
| H | 46.607 | 17.429 | 10.867 |
| H | 47.188 | 18.547 | 11.705 |
| O | 36.528 | 33.94  | 16.228 |
| H | 37.197 | 33.76  | 16.888 |
| H | 35.884 | 33.241 | 16.342 |
| O | 25.227 | 28.846 | 0.122  |
| H | 25.685 | 29.686 | 0.162  |
| H | 24.512 | 28.933 | 0.753  |
| O | 29.024 | 34.007 | 8.127  |
| H | 28.573 | 33.223 | 8.441  |
| H | 29.365 | 33.759 | 7.268  |
| O | 47.671 | 30.877 | 6.624  |

|   |        |        |        |
|---|--------|--------|--------|
| H | 48.298 | 31.285 | 6.027  |
| H | 47.192 | 30.254 | 6.078  |
| O | 22.361 | 16.208 | 10.265 |
| H | 23.035 | 15.77  | 10.785 |
| H | 21.697 | 16.468 | 10.904 |
| O | 52.932 | 23.74  | -2.28  |
| H | 53.219 | 24.636 | -2.458 |
| H | 52.573 | 23.434 | -3.112 |
| O | 41.947 | 21.4   | 4.081  |
| H | 41.379 | 21.959 | 3.55   |
| H | 41.571 | 21.441 | 4.96   |
| O | 40.116 | 23     | 2.806  |
| H | 39.955 | 23.113 | 1.869  |
| H | 40.516 | 23.824 | 3.081  |
| O | 43.453 | 18.815 | 5.757  |
| H | 43.063 | 18.066 | 5.308  |
| H | 43.538 | 19.485 | 5.078  |
| O | 29.429 | 15.782 | 11.819 |
| H | 29.326 | 16.706 | 12.045 |
| H | 29.668 | 15.359 | 12.644 |
| O | 41.115 | 13.785 | 4.79   |
| H | 41.618 | 13.726 | 3.978  |
| H | 41.513 | 13.131 | 5.365  |
| O | 53.315 | 12.623 | 2.885  |
| H | 53.178 | 12.34  | 1.982  |
| H | 54.091 | 12.142 | 3.172  |
| O | 49.233 | 16.721 | -1.157 |
| H | 48.28  | 16.708 | -1.071 |
| H | 49.402 | 17.359 | -1.85  |
| O | 32.245 | 6.444  | 1.899  |
| H | 32.671 | 7.283  | 1.728  |
| H | 31.31  | 6.625  | 1.798  |
| O | 53.488 | 18.253 | -2.031 |
| H | 54.313 | 18.694 | -1.83  |
| H | 52.987 | 18.897 | -2.531 |
| O | 49.482 | 21.118 | 6.802  |
| H | 49.141 | 21.882 | 6.338  |
| H | 49.634 | 21.428 | 7.695  |
| O | 29.979 | 9.409  | 1.127  |
| H | 29.946 | 8.456  | 1.045  |
| H | 29.615 | 9.587  | 1.994  |
| O | 38.794 | 28.072 | 5.031  |
| H | 39.442 | 28.272 | 5.707  |
| H | 38.541 | 27.165 | 5.203  |
| O | 39.973 | 19.445 | -0.862 |
| H | 40.582 | 20.143 | -1.102 |
| H | 39.705 | 19.063 | -1.697 |

|   |        |        |        |
|---|--------|--------|--------|
| O | 38.367 | 12.744 | 6.584  |
| H | 38.467 | 11.856 | 6.243  |
| H | 39.169 | 12.901 | 7.083  |
| O | 51.233 | 23.062 | 10.84  |
| H | 50.781 | 22.232 | 10.689 |
| H | 50.593 | 23.603 | 11.301 |
| O | 30.086 | 6.967  | 7.218  |
| H | 30.366 | 7.716  | 6.693  |
| H | 29.292 | 7.268  | 7.66   |
| O | 34.123 | 28.412 | 7.57   |
| H | 34.071 | 27.681 | 8.186  |
| H | 33.75  | 28.068 | 6.758  |
| O | 44.732 | 19.245 | 8.452  |
| H | 44.948 | 18.329 | 8.63   |
| H | 44.481 | 19.256 | 7.528  |
| O | 37.172 | 19.337 | 2.75   |
| H | 36.496 | 19.962 | 2.49   |
| H | 36.979 | 18.55  | 2.24   |
| O | 43.812 | 33.487 | -0.36  |
| H | 43.567 | 33.928 | -1.173 |
| H | 42.987 | 33.15  | -0.012 |
| O | 34.233 | 21.995 | -1.014 |
| H | 33.785 | 22.626 | -0.451 |
| H | 35.156 | 22.072 | -0.774 |
| O | 41.53  | 29.988 | -1.447 |
| H | 41.412 | 30.522 | -2.233 |
| H | 40.961 | 30.394 | -0.794 |
| O | 40.923 | 28.034 | 6.934  |
| H | 41.13  | 27.812 | 7.842  |
| H | 41.317 | 27.329 | 6.42   |
| O | 40.789 | 6.424  | 8.902  |
| H | 40.204 | 6.632  | 9.631  |
| H | 41.648 | 6.733  | 9.188  |
| O | 39.638 | 11.196 | 3.139  |
| H | 40.209 | 10.445 | 2.981  |
| H | 38.854 | 10.821 | 3.539  |
| O | 46.738 | 13.306 | -0.07  |
| H | 46.091 | 12.607 | 0.031  |
| H | 47.044 | 13.219 | -0.973 |
| O | 38.947 | 16.894 | -0.03  |
| H | 39.085 | 17.837 | -0.126 |
| H | 39.485 | 16.649 | 0.722  |
| O | 37.058 | 27.103 | 14.212 |
| H | 37.787 | 26.507 | 14.042 |
| H | 37.36  | 27.65  | 14.937 |
| O | 23.036 | 9.734  | 9.705  |
| H | 23.039 | 10.037 | 10.613 |

|   |        |        |        |
|---|--------|--------|--------|
| H | 22.11  | 9.721  | 9.461  |
| O | 43.661 | 7.644  | 5.417  |
| H | 43.659 | 7.786  | 6.364  |
| H | 42.869 | 7.132  | 5.25   |
| O | 50.121 | 28.118 | 16.791 |
| H | 50.162 | 28.916 | 16.265 |
| H | 49.185 | 27.942 | 16.886 |
| O | 42.993 | 1.282  | 56.052 |
| H | 43.762 | 0.719  | 55.972 |
| H | 42.339 | 0.877  | 55.481 |
| O | 44.697 | 8.29   | 49.26  |
| H | 44.614 | 7.387  | 48.952 |
| H | 43.809 | 8.643  | 49.207 |
| O | 30.998 | 11.22  | 55.135 |
| H | 30.33  | 10.742 | 55.625 |
| H | 30.562 | 11.476 | 54.322 |
| O | 29.713 | 4.961  | 58.034 |
| H | 30.441 | 4.511  | 58.463 |
| H | 30.133 | 5.567  | 57.423 |
| O | 39.242 | 5.214  | 63.319 |
| H | 39.046 | 4.508  | 62.704 |
| H | 40.199 | 5.254  | 63.341 |
| O | 27.184 | 7.191  | 50.828 |
| H | 26.728 | 6.469  | 50.395 |
| H | 28.073 | 6.865  | 50.966 |
| O | 34.359 | 0.808  | 56.673 |
| H | 33.903 | 0.658  | 57.502 |
| H | 33.92  | 1.569  | 56.293 |
| O | 34.83  | -4.675 | 58.636 |
| H | 34.777 | -5.472 | 59.164 |
| H | 35.572 | -4.194 | 59.003 |
| O | 38.802 | 5.327  | 49.955 |
| H | 38.209 | 5.707  | 50.603 |
| H | 39.171 | 6.082  | 49.497 |
| O | 29.951 | 6.893  | 44.176 |
| H | 30.385 | 6.397  | 43.481 |
| H | 29.108 | 7.145  | 43.799 |
| O | 35.397 | 9.344  | 56.737 |
| H | 36.324 | 9.319  | 56.498 |
| H | 35.129 | 10.246 | 56.564 |
| O | 44.208 | 18.448 | 60.905 |
| H | 43.275 | 18.661 | 60.892 |
| H | 44.645 | 19.272 | 60.692 |
| O | 47.401 | 7.944  | 56.127 |
| H | 46.773 | 7.632  | 56.779 |
| H | 47.479 | 7.221  | 55.504 |
| O | 37.252 | 3.234  | 50.661 |



|   |        |        |        |
|---|--------|--------|--------|
| H | 37.805 | 4.006  | 50.544 |
| H | 37.293 | 3.049  | 51.599 |
| O | 45.629 | 10.795 | 61.299 |
| H | 45.981 | 11.652 | 61.541 |
| H | 44.68  | 10.894 | 61.381 |
| O | 35.537 | 9.24   | 52.716 |
| H | 35.941 | 9.123  | 51.856 |
| H | 36.193 | 8.917  | 53.334 |
| O | 33.51  | 7.734  | 63.434 |
| H | 33.384 | 6.79   | 63.34  |
| H | 33.236 | 8.098  | 62.592 |
| O | 44.451 | 6.199  | 47.738 |
| H | 44.945 | 5.483  | 47.338 |
| H | 44.399 | 6.866  | 47.053 |
| O | 38.345 | 5.829  | 58.686 |
| H | 39.288 | 5.817  | 58.524 |
| H | 37.954 | 5.594  | 57.844 |
| O | 32.623 | 5.52   | 55.396 |
| H | 31.715 | 5.824  | 55.415 |
| H | 33.121 | 6.228  | 55.802 |
| O | 31.96  | 2.583  | 59.2   |
| H | 31.417 | 2.288  | 58.469 |
| H | 31.333 | 2.81   | 59.887 |
| O | 31.087 | 11.914 | 49.977 |
| H | 30.586 | 12.19  | 50.744 |
| H | 30.655 | 11.112 | 49.684 |
| O | 37.484 | 15.621 | 54.62  |
| H | 38.075 | 16.272 | 54.242 |
| H | 36.934 | 15.342 | 53.888 |
| O | 32.029 | 7.246  | 58.159 |
| H | 32.883 | 7.304  | 57.732 |
| H | 32.228 | 6.991  | 59.06  |
| O | 38.062 | 5.811  | 54.179 |
| H | 37.301 | 5.411  | 54.6   |
| H | 37.79  | 5.944  | 53.271 |
| O | 43.546 | 2.474  | 58.474 |
| H | 43.741 | 1.943  | 57.702 |
| H | 43.597 | 3.378  | 58.162 |
| O | 40.372 | 3.071  | 56.59  |
| H | 40.953 | 2.398  | 56.944 |
| H | 40.455 | 2.983  | 55.64  |
| O | 36.252 | 0.947  | 49.601 |
| H | 36.64  | 1.716  | 50.019 |
| H | 36.964 | 0.57   | 49.084 |
| O | 42.046 | -2.297 | 43.785 |
| H | 41.366 | -2.813 | 43.351 |
| H | 42.458 | -1.801 | 43.077 |

|   |        |        |        |
|---|--------|--------|--------|
| O | 34.333 | 3.887  | 51.727 |
| H | 33.768 | 3.66   | 50.989 |
| H | 34.828 | 3.087  | 51.904 |
| O | 37.897 | 2.005  | 57.467 |
| H | 37.463 | 2.03   | 56.614 |
| H | 38.774 | 2.35   | 57.3   |
| O | 39.186 | 10.012 | 50.217 |
| H | 39.546 | 10.896 | 50.288 |
| H | 39.502 | 9.562  | 51.001 |
| O | 44.204 | 0.517  | 52.024 |
| H | 44.608 | 1.343  | 52.291 |
| H | 43.787 | 0.714  | 51.185 |
| O | 41.654 | 0.954  | 53.777 |
| H | 41.539 | 1.168  | 52.851 |
| H | 41.314 | 0.063  | 53.861 |
| O | 49.262 | 3.738  | 53.256 |
| H | 49.087 | 3.172  | 52.504 |
| H | 50.195 | 3.62   | 53.432 |
| O | 35.613 | 4.352  | 56.671 |
| H | 35.057 | 5.104  | 56.465 |
| H | 35.14  | 3.887  | 57.361 |
| O | 39.489 | 7.772  | 48.626 |
| H | 39.838 | 7.731  | 47.736 |
| H | 39.597 | 8.688  | 48.883 |
| O | 26.359 | 0.321  | 53.848 |
| H | 27.13  | 0.165  | 54.394 |
| H | 25.951 | -0.539 | 53.757 |
| O | 36.897 | 2.578  | 55.069 |
| H | 36.4   | 2.306  | 54.298 |
| H | 36.279 | 3.102  | 55.579 |
| O | 40.083 | 6.912  | 65.197 |
| H | 39.502 | 6.452  | 64.592 |
| H | 40.07  | 6.38   | 65.993 |
| O | 42.312 | 13.742 | 50.199 |
| H | 42.131 | 14.167 | 51.037 |
| H | 43.049 | 14.234 | 49.836 |
| O | 33.55  | 17.541 | 43.911 |
| H | 33.603 | 17.826 | 42.998 |
| H | 33.052 | 18.231 | 44.349 |
| O | 48.237 | -1.782 | 46.718 |
| H | 48.53  | -1.902 | 47.621 |
| H | 47.908 | -0.883 | 46.691 |
| O | 37.103 | 11.431 | 47.259 |
| H | 37.275 | 12.308 | 47.602 |
| H | 37.839 | 10.904 | 47.57  |
| O | 33.254 | 6.408  | 46.882 |
| H | 33.672 | 5.697  | 46.397 |

|   |        |        |        |
|---|--------|--------|--------|
| H | 33.164 | 7.114  | 46.243 |
| O | 38.596 | 7.444  | 42.953 |
| H | 39.296 | 8.083  | 42.821 |
| H | 38.588 | 6.927  | 42.148 |
| O | 39.889 | 11.766 | 57.394 |
| H | 40.015 | 11.478 | 56.49  |
| H | 39.373 | 12.569 | 57.319 |
| O | 44.142 | 3.231  | 48.285 |
| H | 44.164 | 3.447  | 47.352 |
| H | 44.93  | 3.639  | 48.644 |
| O | 26.918 | 4.899  | 38.737 |
| H | 26.951 | 5.767  | 39.139 |
| H | 26.418 | 5.027  | 37.931 |
| O | 34.564 | 4.952  | 44.782 |
| H | 35.407 | 5.385  | 44.919 |
| H | 34.646 | 4.118  | 45.244 |
| O | 42.354 | 6.344  | 59.17  |
| H | 41.717 | 6.02   | 58.534 |
| H | 42.166 | 7.28   | 59.242 |
| O | 31.988 | 10.976 | 59.567 |
| H | 31.979 | 11.728 | 60.159 |
| H | 31.093 | 10.638 | 59.597 |
| O | 27.81  | 11.134 | 49.282 |
| H | 28.56  | 10.539 | 49.255 |
| H | 27.05  | 10.557 | 49.362 |
| O | 32.264 | 7.287  | 41.61  |
| H | 32.892 | 6.799  | 41.076 |
| H | 32.801 | 7.725  | 42.271 |
| O | 47.864 | 5.627  | 54.607 |
| H | 47.084 | 5.129  | 54.849 |
| H | 48.473 | 4.97   | 54.271 |
| O | 36.861 | 6.013  | 51.694 |
| H | 36.79  | 6.928  | 51.419 |
| H | 35.963 | 5.684  | 51.661 |
| O | 41.137 | 0.798  | 50.969 |
| H | 41.358 | -0.119 | 51.131 |
| H | 41.626 | 1.026  | 50.178 |
| O | 32.061 | 6.765  | 49.267 |
| H | 32.581 | 7.326  | 49.842 |
| H | 32.656 | 6.535  | 48.554 |
| O | 37.974 | 0.265  | 52.252 |
| H | 37.469 | -0.176 | 51.569 |
| H | 38.587 | 0.824  | 51.774 |
| O | 43.242 | 11.663 | 48.642 |
| H | 42.676 | 12.143 | 49.245 |
| H | 42.88  | 10.777 | 48.625 |
| O | 39.735 | 10.264 | 47.159 |

|   |        |        |        |
|---|--------|--------|--------|
| H | 40.578 | 9.875  | 46.926 |
| H | 39.958 | 11.123 | 47.516 |
| O | 28.981 | 8.167  | 47.533 |
| H | 28.048 | 7.959  | 47.486 |
| H | 29.42  | 7.373  | 47.229 |
| O | 36.597 | 8.41   | 50.412 |
| H | 36.28  | 8.015  | 49.599 |
| H | 37.323 | 8.97   | 50.138 |
| O | 34.574 | 11.691 | 54.018 |
| H | 34.831 | 11.373 | 53.153 |
| H | 34.031 | 10.991 | 54.379 |
| O | 48.737 | 2.133  | 50.897 |
| H | 49.616 | 1.776  | 50.771 |
| H | 48.196 | 1.669  | 50.258 |
| O | 28.342 | -3.179 | 51.774 |
| H | 28.761 | -2.556 | 51.18  |
| H | 27.739 | -2.646 | 52.292 |
| O | 53.393 | 5.046  | 51.45  |
| H | 53.656 | 5.336  | 50.576 |
| H | 54.216 | 4.967  | 51.933 |
| O | 48.019 | 9.141  | 39.188 |
| H | 48.017 | 10.078 | 38.996 |
| H | 48.78  | 9.014  | 39.755 |
| O | 36.564 | -0.304 | 55.327 |
| H | 35.756 | 0.11   | 55.631 |
| H | 37.078 | 0.415  | 54.96  |
| O | 44.335 | 8.701  | 60.027 |
| H | 44.365 | 9.325  | 59.301 |
| H | 44.814 | 9.133  | 60.734 |
| O | 44.376 | 5.002  | 57.788 |
| H | 45.247 | 5.381  | 57.907 |
| H | 43.798 | 5.563  | 58.305 |
| O | 33.668 | 13.229 | 60.985 |
| H | 33.294 | 12.928 | 61.813 |
| H | 33.314 | 14.11  | 60.867 |
| O | 37.409 | 10.3   | 63.541 |
| H | 36.573 | 10.658 | 63.243 |
| H | 37.257 | 9.357  | 63.605 |
| O | 33.615 | 2.734  | 54.639 |
| H | 34.104 | 2.905  | 53.833 |
| H | 33.473 | 3.6    | 55.021 |
| O | 33.136 | 9.631  | 54.596 |
| H | 32.235 | 9.929  | 54.722 |
| H | 33.051 | 8.812  | 54.108 |
| O | 55.857 | 13.736 | 55.622 |
| H | 55.303 | 13.187 | 56.177 |
| H | 56.752 | 13.498 | 55.866 |

|   |        |        |        |
|---|--------|--------|--------|
| O | 29.331 | 9.297  | 56.354 |
| H | 29.433 | 8.39   | 56.642 |
| H | 28.879 | 9.729  | 57.079 |
| O | 40.527 | 5.992  | 57.08  |
| H | 40.475 | 5.152  | 56.625 |
| H | 40.817 | 6.61   | 56.41  |
| O | 32.778 | -2.319 | 35.767 |
| H | 32.035 | -1.745 | 35.955 |
| H | 33.09  | -2.033 | 34.908 |
| O | 39.717 | 8.609  | 38.847 |
| H | 38.918 | 9.128  | 38.757 |
| H | 39.611 | 8.148  | 39.679 |
| O | 36.919 | 8.97   | 37.487 |
| H | 37.218 | 9.298  | 36.639 |
| H | 37.05  | 9.704  | 38.087 |
| O | 49.274 | 14.746 | 38.27  |
| H | 49.179 | 14.237 | 39.074 |
| H | 50.09  | 14.429 | 37.881 |
| O | 31.496 | 14.178 | 41.964 |
| H | 32.286 | 13.773 | 41.606 |
| H | 31.807 | 14.69  | 42.711 |
| O | 22.874 | 3.585  | 34.912 |
| H | 22.204 | 3.505  | 35.591 |
| H | 22.384 | 3.567  | 34.089 |
| O | 42.052 | 7.029  | 35     |
| H | 42.347 | 6.541  | 35.769 |
| H | 41.507 | 7.731  | 35.356 |
| O | 31.563 | 0.726  | 35.967 |
| H | 32.016 | 1.569  | 35.988 |
| H | 31.117 | 0.715  | 35.121 |
| O | 42.347 | 11.379 | 43.246 |
| H | 42.714 | 11.355 | 44.13  |
| H | 41.402 | 11.445 | 43.381 |
| O | 40.204 | 4.889  | 38.643 |
| H | 39.755 | 5.047  | 37.813 |
| H | 41.067 | 5.285  | 38.528 |
| O | 32.078 | 8.284  | 45.111 |
| H | 31.371 | 7.925  | 44.574 |
| H | 32.465 | 8.971  | 44.568 |
| O | 28.912 | 5.61   | 25.443 |
| H | 29.034 | 5.357  | 24.528 |
| H | 29.714 | 6.08   | 25.67  |
| O | 50.856 | 3.447  | 42.384 |
| H | 51.126 | 4.346  | 42.568 |
| H | 49.903 | 3.458  | 42.479 |
| O | 39.468 | 11.861 | 44.615 |
| H | 39.438 | 11.138 | 45.241 |

|   |        |        |        |
|---|--------|--------|--------|
| H | 39.055 | 12.592 | 45.073 |
| O | 46.689 | 6.69   | 35.157 |
| H | 47.229 | 7.266  | 35.697 |
| H | 46.681 | 5.857  | 35.628 |
| O | 44.315 | 2.891  | 39.521 |
| H | 43.72  | 2.475  | 38.897 |
| H | 43.765 | 3.094  | 40.278 |
| O | 38.457 | 1.458  | 38.786 |
| H | 37.863 | 1.383  | 39.534 |
| H | 37.883 | 1.437  | 38.021 |
| O | 51.948 | 7.965  | 46.494 |
| H | 51.484 | 7.274  | 46.967 |
| H | 52.575 | 7.498  | 45.942 |
| O | 49.657 | 4.76   | 38.926 |
| H | 49.359 | 3.851  | 38.961 |
| H | 48.899 | 5.271  | 39.211 |
| O | 29.52  | 3.426  | 37.016 |
| H | 28.909 | 3.157  | 37.702 |
| H | 28.961 | 3.67   | 36.279 |
| O | 29.96  | 9.451  | 49.691 |
| H | 29.585 | 8.992  | 48.939 |
| H | 30.794 | 9.01   | 49.849 |
| O | 41.497 | 8.245  | 46.147 |
| H | 42.352 | 8.298  | 45.72  |
| H | 41.02  | 7.583  | 45.647 |
| O | 24.902 | 8.709  | 50.671 |
| H | 24.941 | 9.287  | 51.433 |
| H | 25.687 | 8.166  | 50.741 |
| O | 37.279 | -1.509 | 37.113 |
| H | 37.348 | -0.568 | 36.949 |
| H | 38.166 | -1.775 | 37.355 |
| O | 35.933 | 7.085  | 48.028 |
| H | 35.244 | 6.469  | 47.778 |
| H | 36.741 | 6.68   | 47.712 |
| O | 46.211 | 4.989  | 39.189 |
| H | 46.387 | 5.585  | 39.916 |
| H | 45.685 | 4.289  | 39.575 |
| O | 30.251 | 13.738 | 46.554 |
| H | 31.116 | 14.071 | 46.791 |
| H | 30.309 | 12.794 | 46.702 |
| O | 30.285 | -0.466 | 38.172 |
| H | 29.985 | -0.197 | 39.04  |
| H | 30.365 | 0.352  | 37.681 |
| O | 56.405 | 15.358 | 40.394 |
| H | 55.496 | 15.072 | 40.303 |
| H | 56.353 | 16.159 | 40.915 |
| O | 39.175 | 5.466  | 36.028 |

|   |        |        |        |
|---|--------|--------|--------|
| H | 39.565 | 4.676  | 35.655 |
| H | 38.933 | 5.995  | 35.268 |
| O | 30.229 | 15.517 | 36.578 |
| H | 31.086 | 15.626 | 36.99  |
| H | 29.705 | 16.242 | 36.92  |
| O | 54.604 | 11.901 | 42.589 |
| H | 54.558 | 12.421 | 43.392 |
| H | 54.611 | 12.55  | 41.885 |
| O | 35.813 | 9.37   | 46.279 |
| H | 35.937 | 8.66   | 46.908 |
| H | 35.991 | 10.167 | 46.778 |
| O | 39.338 | 8.197  | 28.824 |
| H | 38.453 | 8.095  | 29.175 |
| H | 39.503 | 9.139  | 28.859 |
| O | 31.987 | 3.304  | 33.871 |
| H | 31.682 | 4.015  | 33.308 |
| H | 32.78  | 3.647  | 34.282 |
| O | 36.874 | 9.241  | 21.873 |
| H | 37.276 | 9.81   | 21.216 |
| H | 36.183 | 8.779  | 21.399 |
| O | 37.891 | 16.41  | 42.994 |
| H | 38.608 | 15.777 | 43.015 |
| H | 37.705 | 16.532 | 42.063 |
| O | 32.316 | 3.244  | 36.809 |
| H | 32.181 | 2.604  | 37.507 |
| H | 31.533 | 3.794  | 36.832 |
| O | 42.522 | 3.282  | 41.968 |
| H | 42.273 | 4.123  | 42.351 |
| H | 41.799 | 3.063  | 41.38  |
| O | 33.832 | 0.332  | 43.709 |
| H | 34.133 | -0.576 | 43.731 |
| H | 34.491 | 0.815  | 44.207 |
| O | 38.423 | 5.538  | 40.942 |
| H | 37.934 | 4.723  | 41.062 |
| H | 39.084 | 5.326  | 40.283 |
| O | 33.235 | 1.999  | 31.115 |
| H | 33.068 | 2.246  | 30.206 |
| H | 33.425 | 2.826  | 31.558 |
| O | 27.613 | 4.133  | 44.453 |
| H | 27.355 | 4.026  | 45.369 |
| H | 28.532 | 4.396  | 44.493 |
| O | 32.896 | 6.817  | 34.296 |
| H | 33.448 | 6.172  | 34.738 |
| H | 32.297 | 6.295  | 33.763 |
| O | 40.25  | 3.42   | 48.61  |
| H | 39.849 | 2.628  | 48.968 |
| H | 39.73  | 4.137  | 48.973 |

|   |        |        |        |
|---|--------|--------|--------|
| O | 29.411 | -2.858 | 37.18  |
| H | 29.362 | -3.006 | 36.235 |
| H | 29.79  | -1.984 | 37.267 |
| O | 50.414 | 0.754  | 35.539 |
| H | 50.654 | 1.551  | 35.066 |
| H | 49.472 | 0.664  | 35.393 |
| O | 42.517 | 5.31   | 44.306 |
| H | 41.573 | 5.314  | 44.465 |
| H | 42.722 | 6.212  | 44.06  |
| O | 39.841 | 2.62   | 35.57  |
| H | 39.955 | 2.544  | 34.623 |
| H | 39.158 | 1.983  | 35.781 |
| O | 42.077 | 5.808  | 27.284 |
| H | 42.893 | 6.016  | 26.83  |
| H | 41.399 | 6.254  | 26.777 |
| O | 38.949 | -0.239 | 45.669 |
| H | 39.01  | 0.196  | 44.818 |
| H | 39.82  | -0.61  | 45.812 |
| O | 40.272 | 2.399  | 41.007 |
| H | 39.742 | 2.318  | 40.214 |
| H | 40.663 | 1.533  | 41.123 |
| O | 41.266 | 2.651  | 45.906 |
| H | 40.563 | 2.384  | 45.315 |
| H | 40.838 | 2.758  | 46.755 |
| O | 43.921 | 1.877  | 33.122 |
| H | 43.384 | 1.235  | 33.587 |
| H | 43.318 | 2.289  | 32.502 |
| O | 48.676 | 7.835  | 37.015 |
| H | 49.446 | 8.396  | 36.923 |
| H | 48.269 | 8.12   | 37.833 |
| O | 45.445 | 11.509 | 27.647 |
| H | 45.155 | 11.658 | 26.747 |
| H | 44.677 | 11.147 | 28.089 |
| O | 36.36  | 7.478  | 39.965 |
| H | 36.331 | 7.612  | 39.018 |
| H | 37.176 | 7      | 40.114 |
| O | 42.794 | 5.438  | 37.779 |
| H | 43.219 | 6.041  | 38.389 |
| H | 43.13  | 4.575  | 38.023 |
| O | 38.649 | 5.539  | 31.155 |
| H | 39.113 | 5.128  | 30.425 |
| H | 39.329 | 6.014  | 31.634 |
| O | 35.256 | 2.021  | 38.234 |
| H | 35.19  | 1.636  | 39.108 |
| H | 34.885 | 2.898  | 38.33  |
| O | 50.601 | 9.022  | 40.747 |
| H | 51.129 | 8.238  | 40.597 |



|   |        |        |        |
|---|--------|--------|--------|
| H | 50.97  | 9.676  | 40.154 |
| O | 46.458 | 4.649  | 36.582 |
| H | 46.465 | 4.826  | 37.522 |
| H | 45.68  | 4.109  | 36.444 |
| O | 42.816 | 10.721 | 37.236 |
| H | 42.511 | 9.825  | 37.381 |
| H | 42.946 | 11.075 | 38.115 |
| O | 44.889 | 9.185  | 43.482 |
| H | 45.282 | 10.027 | 43.712 |
| H | 45.185 | 9.018  | 42.587 |
| O | 49.026 | 1.992  | 29.211 |
| H | 48.863 | 1.891  | 28.273 |
| H | 49.231 | 1.107  | 29.514 |
| O | 28.921 | 9.454  | 42.297 |
| H | 29.519 | 9.477  | 41.549 |
| H | 29.184 | 10.2   | 42.836 |
| O | 32.594 | 4.8    | 42.864 |
| H | 32.668 | 5.491  | 42.206 |
| H | 33.313 | 4.971  | 43.473 |
| O | 41.308 | 6.791  | 29.881 |
| H | 40.492 | 7.189  | 29.579 |
| H | 41.736 | 6.485  | 29.082 |
| O | 44.299 | 6.259  | 33.613 |
| H | 43.569 | 6.52   | 34.175 |
| H | 45.069 | 6.318  | 34.179 |
| O | 50.129 | 9.758  | 23.23  |
| H | 49.388 | 10.209 | 23.636 |
| H | 50.747 | 9.618  | 23.948 |
| O | 34.445 | 11.233 | 33.362 |
| H | 34.169 | 10.317 | 33.326 |
| H | 33.927 | 11.612 | 34.072 |
| O | 44.422 | 2.53   | 35.8   |
| H | 44.485 | 2.203  | 34.903 |
| H | 43.483 | 2.632  | 35.953 |
| O | 31.776 | 6.802  | 30.124 |
| H | 31.099 | 7.433  | 29.879 |
| H | 32.059 | 6.419  | 29.293 |
| O | 30.92  | 7.264  | 25.545 |
| H | 31.348 | 7.829  | 26.189 |
| H | 31.329 | 7.498  | 24.712 |
| O | 42.644 | 5.051  | 31.748 |
| H | 43.443 | 5.485  | 32.048 |
| H | 42.235 | 5.684  | 31.158 |
| O | 30.147 | 11.662 | 43.983 |
| H | 29.777 | 11.435 | 44.837 |
| H | 31.085 | 11.493 | 44.076 |
| O | 31.073 | 7.501  | 37.045 |

|   |        |        |        |
|---|--------|--------|--------|
| H | 31.938 | 7.812  | 36.777 |
| H | 30.862 | 8.019  | 37.822 |
| O | 35.158 | 14.266 | 49.896 |
| H | 34.489 | 14.708 | 50.42  |
| H | 34.664 | 13.677 | 49.326 |
| O | 36.791 | 7.888  | 29.798 |
| H | 36.71  | 8.318  | 30.65  |
| H | 36.796 | 6.953  | 30.001 |
| O | 38.645 | 0.72   | 48.125 |
| H | 38.435 | 0.72   | 47.191 |
| H | 39.386 | 0.119  | 48.204 |
| O | 36.39  | 9.199  | 43.566 |
| H | 37.243 | 8.798  | 43.399 |
| H | 36.23  | 9.04   | 44.497 |
| O | 45.897 | 9.721  | 30.911 |
| H | 45.159 | 10.117 | 31.375 |
| H | 45.576 | 8.861  | 30.641 |
| O | 30.518 | 2.343  | 54.339 |
| H | 30.132 | 3.213  | 54.241 |
| H | 31.452 | 2.475  | 54.177 |
| O | 39.409 | -3.205 | 31.68  |
| H | 38.824 | -3.62  | 31.046 |
| H | 40.283 | -3.312 | 31.305 |
| O | 35.815 | 3.908  | 41.639 |
| H | 35.129 | 4.428  | 41.22  |
| H | 35.735 | 3.041  | 41.242 |
| O | 41.662 | -3.333 | 30.171 |
| H | 41.682 | -3.239 | 29.218 |
| H | 42.436 | -3.857 | 30.376 |
| O | 53.522 | 9.572  | 43.604 |
| H | 54.107 | 10.297 | 43.381 |
| H | 53.936 | 9.155  | 44.36  |
| O | 31.346 | 1.288  | 46.834 |
| H | 30.925 | 0.54   | 47.257 |
| H | 31.288 | 1.097  | 45.897 |
| O | 34.492 | 4.652  | 26.37  |
| H | 34.595 | 3.719  | 26.558 |
| H | 35.066 | 4.81   | 25.62  |
| O | 38.848 | 3.963  | 28.694 |
| H | 38.888 | 3.034  | 28.92  |
| H | 39.501 | 4.07   | 28.002 |
| O | 47.489 | 5.728  | 45.625 |
| H | 46.655 | 5.433  | 45.257 |
| H | 47.472 | 5.421  | 46.532 |
| O | 44.906 | -0.026 | 45.485 |
| H | 44.46  | -0.36  | 46.263 |
| H | 44.237 | 0.48   | 45.024 |

|   |        |         |        |
|---|--------|---------|--------|
| O | 40.115 | 9.331   | 41.566 |
| H | 40.27  | 9.421   | 40.626 |
| H | 39.655 | 10.133  | 41.811 |
| O | 40.255 | -10.175 | 42.396 |
| H | 40.347 | -10.304 | 43.34  |
| H | 40.969 | -9.579  | 42.165 |
| O | 39.886 | -6.224  | 44.602 |
| H | 39.273 | -5.708  | 45.125 |
| H | 39.482 | -7.09   | 44.544 |
| O | 20.431 | 14.633  | 54.189 |
| H | 19.938 | 14.345  | 53.421 |
| H | 21.339 | 14.4    | 53.993 |
| O | 33.027 | 10.206  | 47.079 |
| H | 33.818 | 9.681   | 46.962 |
| H | 32.329 | 9.677   | 46.692 |
| O | 40.847 | 9.153   | 32.709 |
| H | 40.956 | 9.369   | 33.635 |
| H | 40.743 | 8.201   | 32.696 |
| O | 31.991 | 8.65    | 27.402 |
| H | 32.899 | 8.903   | 27.57  |
| H | 31.487 | 9.096   | 28.082 |
| O | 33.951 | 10.284  | 40.282 |
| H | 34.753 | 10.746  | 40.04  |
| H | 33.954 | 10.283  | 41.239 |
| O | 35.849 | 3.814   | 48.012 |
| H | 36.254 | 3.46    | 48.804 |
| H | 34.962 | 3.455   | 48.016 |
| O | 38.229 | 11.486  | 41.934 |
| H | 37.405 | 11.102  | 42.234 |
| H | 38.538 | 12.002  | 42.679 |
| O | 47.59  | 6.08    | 50.134 |
| H | 47.814 | 6.764   | 49.503 |
| H | 47.614 | 6.521   | 50.983 |
| O | 47.878 | 2.275   | 35.58  |
| H | 47.456 | 1.76    | 36.268 |
| H | 47.842 | 3.177   | 35.899 |
| O | 46.801 | 3.461   | 30.362 |
| H | 47.027 | 3.672   | 31.268 |
| H | 47.476 | 2.841   | 30.085 |
| O | 29.181 | 2.611   | 33.358 |
| H | 28.766 | 3.32    | 33.85  |
| H | 30.117 | 2.806   | 33.401 |
| O | 46.378 | 6.864   | 41.107 |
| H | 46.424 | 7.707   | 40.658 |
| H | 47.002 | 6.943   | 41.829 |
| O | 41.051 | 14.344  | 46.597 |
| H | 40.991 | 14.181  | 47.539 |

|   |        |        |        |
|---|--------|--------|--------|
| H | 41.712 | 13.723 | 46.289 |
| O | 40.633 | -0.225 | 38.056 |
| H | 40.218 | -1.055 | 38.293 |
| H | 40.02  | 0.444  | 38.36  |
| O | 61.631 | 2.246  | 38.511 |
| H | 61.581 | 1.489  | 39.094 |
| H | 61.215 | 1.953  | 37.701 |
| O | 40.009 | 11.748 | 37.893 |
| H | 40.341 | 12.64  | 37.995 |
| H | 40.785 | 11.224 | 37.696 |
| O | 44.738 | 4.687  | 45.385 |
| H | 43.791 | 4.765  | 45.276 |
| H | 45.003 | 4.042  | 44.729 |
| O | 46.465 | 1.639  | 49.351 |
| H | 45.547 | 1.441  | 49.539 |
| H | 46.723 | 0.983  | 48.704 |
| O | 36.342 | 8.097  | 33.446 |
| H | 35.42  | 8.145  | 33.195 |
| H | 36.477 | 7.182  | 33.691 |
| O | 37.007 | 3.306  | 44.046 |
| H | 36.281 | 2.762  | 44.352 |
| H | 36.696 | 3.679  | 43.221 |
| O | 33.903 | 8.631  | 37.763 |
| H | 34.83  | 8.847  | 37.663 |
| H | 33.668 | 8.978  | 38.624 |
| O | 42.334 | 8.794  | 48.663 |
| H | 42.138 | 8.577  | 47.751 |
| H | 41.731 | 8.253  | 49.173 |
| O | 33.79  | 9.288  | 43.28  |
| H | 34.736 | 9.152  | 43.225 |
| H | 33.696 | 10.186 | 43.599 |
| O | 48.27  | 14.018 | 34.954 |
| H | 47.558 | 13.407 | 34.765 |
| H | 48.932 | 13.487 | 35.396 |
| O | 29.257 | 5.064  | 41.846 |
| H | 29.912 | 4.883  | 41.171 |
| H | 29.588 | 4.62   | 42.626 |
| O | 33.305 | 13.518 | 39.893 |
| H | 32.641 | 13.524 | 39.203 |
| H | 33.915 | 12.828 | 39.631 |
| O | 45.085 | 9.622  | 40.722 |
| H | 44.253 | 10.088 | 40.809 |
| H | 45.526 | 10.053 | 39.99  |
| O | 31.352 | 12.911 | 32.165 |
| H | 30.804 | 13.569 | 32.592 |
| H | 31.405 | 12.196 | 32.799 |
| O | 35.352 | 12.054 | 38.779 |

|   |        |        |        |
|---|--------|--------|--------|
| H | 35.212 | 12.302 | 37.865 |
| H | 36.293 | 11.895 | 38.843 |
| O | 46.117 | 13.829 | 42.5   |
| H | 46.943 | 13.721 | 42.028 |
| H | 46.255 | 14.599 | 43.052 |
| O | 37.707 | 9.883  | 35.192 |
| H | 37.674 | 10.66  | 34.633 |
| H | 37.454 | 9.162  | 34.616 |
| O | 48.011 | 7.616  | 52.606 |
| H | 48.417 | 6.989  | 53.204 |
| H | 48.747 | 8.095  | 52.225 |
| O | 37.894 | 1.152  | 29.546 |
| H | 37.817 | 1.561  | 30.408 |
| H | 37.276 | 0.422  | 29.571 |
| O | 44.468 | 5.741  | 23.35  |
| H | 44.084 | 4.926  | 23.024 |
| H | 45.307 | 5.477  | 23.726 |
| O | 31.726 | 4.444  | 15.604 |
| H | 31.528 | 3.515  | 15.481 |
| H | 32.678 | 4.498  | 15.526 |
| O | 42.095 | 11.987 | 21.688 |
| H | 41.547 | 11.373 | 21.199 |
| H | 41.683 | 12.041 | 22.55  |
| O | 33.807 | 1.681  | 16.326 |
| H | 34.19  | 0.828  | 16.122 |
| H | 33.525 | 1.606  | 17.237 |
| O | 33.634 | 5.785  | 21.391 |
| H | 33.243 | 5.342  | 20.638 |
| H | 32.894 | 5.982  | 21.964 |
| O | 38.721 | 7.568  | 16.269 |
| H | 39.41  | 7.777  | 16.901 |
| H | 37.946 | 7.404  | 16.806 |
| O | 44.79  | 4.843  | 15.477 |
| H | 44.574 | 4.493  | 14.612 |
| H | 43.961 | 5.182  | 15.812 |
| O | 36.561 | 5.933  | 15.152 |
| H | 37.12  | 5.344  | 14.645 |
| H | 36.86  | 6.811  | 14.915 |
| O | 33.41  | 8.559  | 24.394 |
| H | 33.977 | 8.01   | 24.936 |
| H | 33.976 | 9.274  | 24.103 |
| O | 37.861 | 1.538  | 26.733 |
| H | 37.087 | 1.454  | 26.176 |
| H | 37.595 | 1.162  | 27.572 |
| O | 31.461 | 10.799 | 18.62  |
| H | 31.541 | 10.338 | 19.455 |
| H | 30.527 | 10.756 | 18.411 |

|   |        |        |        |
|---|--------|--------|--------|
| O | 40.831 | 0.537  | 28.493 |
| H | 40.037 | 0.692  | 29.005 |
| H | 41     | 1.371  | 28.054 |
| O | 37.819 | 15.095 | 19.664 |
| H | 38.251 | 15.576 | 20.369 |
| H | 37.089 | 15.657 | 19.403 |
| O | 48.4   | 5.313  | 14.232 |
| H | 48.047 | 4.747  | 13.545 |
| H | 47.998 | 6.166  | 14.07  |
| O | 45.588 | 6.606  | 19.152 |
| H | 46.219 | 6.245  | 19.774 |
| H | 45.968 | 7.443  | 18.883 |
| O | 43.533 | 1.282  | 20.542 |
| H | 43.318 | 0.648  | 19.858 |
| H | 44.391 | 1.624  | 20.29  |
| O | 51.91  | 7.975  | 29.351 |
| H | 51.035 | 7.731  | 29.653 |
| H | 51.774 | 8.781  | 28.853 |
| O | 50.943 | -0.356 | 14.901 |
| H | 50.249 | -0.027 | 14.33  |
| H | 50.483 | -0.675 | 15.678 |
| O | 44.156 | 8.26   | 13.699 |
| H | 43.709 | 7.629  | 14.264 |
| H | 43.569 | 9.015  | 13.673 |
| O | 32.888 | 4.545  | 18.693 |
| H | 32.804 | 3.607  | 18.861 |
| H | 32.94  | 4.614  | 17.739 |
| O | 41.723 | 9.597  | 27.011 |
| H | 42.237 | 9.52   | 27.815 |
| H | 40.873 | 9.928  | 27.301 |
| O | 35.546 | 10.167 | 24.124 |
| H | 35.956 | 9.909  | 24.95  |
| H | 36.193 | 9.943  | 23.455 |
| O | 52.57  | -2.829 | 15.887 |
| H | 53.284 | -2.199 | 15.979 |
| H | 51.897 | -2.358 | 15.395 |
| O | 31.978 | 3.989  | 23.01  |
| H | 31.058 | 3.926  | 22.755 |
| H | 32.13  | 3.216  | 23.554 |
| O | 42.34  | 6.151  | 15.937 |
| H | 42.394 | 6.679  | 16.734 |
| H | 41.448 | 5.805  | 15.94  |
| O | 34.5   | 8.798  | 28.752 |
| H | 34.675 | 8.358  | 27.921 |
| H | 35.277 | 8.624  | 29.284 |
| O | 29.013 | -6.109 | 19.429 |
| H | 28.952 | -5.986 | 18.482 |

|   |        |        |        |
|---|--------|--------|--------|
| H | 29.862 | -5.735 | 19.665 |
| O | 56.005 | 6.664  | 30.955 |
| H | 55.118 | 6.576  | 31.306 |
| H | 56.573 | 6.362  | 31.663 |
| O | 35.013 | 7.499  | 26.192 |
| H | 35.902 | 7.168  | 26.067 |
| H | 34.465 | 6.715  | 26.204 |
| O | 31.418 | 7.608  | 22.556 |
| H | 30.89  | 8.208  | 22.028 |
| H | 32.104 | 8.159  | 22.931 |
| O | 54.861 | 0.774  | 27.059 |
| H | 55.335 | 1.557  | 27.337 |
| H | 55.36  | 0.047  | 27.432 |
| O | 43.497 | 13.501 | 26.586 |
| H | 43.213 | 13.324 | 27.483 |
| H | 42.72  | 13.855 | 26.154 |
| O | 46.857 | 12.426 | 17.066 |
| H | 47.03  | 13.268 | 16.645 |
| H | 47.623 | 11.891 | 16.857 |
| O | 34.755 | 12.349 | 15.925 |
| H | 35.458 | 11.896 | 15.46  |
| H | 33.968 | 11.844 | 15.721 |
| O | 36.84  | 2.216  | 12.026 |
| H | 37.403 | 2.053  | 12.783 |
| H | 35.979 | 1.897  | 12.296 |
| O | 42.163 | 16.536 | 20.842 |
| H | 41.957 | 15.675 | 20.479 |
| H | 42.43  | 16.359 | 21.744 |
| O | 38.423 | 13.706 | 17.549 |
| H | 38.26  | 14.162 | 18.375 |
| H | 38.486 | 12.783 | 17.794 |
| O | 48.751 | 5.058  | 16.809 |
| H | 47.923 | 4.857  | 17.245 |
| H | 48.519 | 5.148  | 15.884 |
| O | 40.792 | 4.737  | 22.986 |
| H | 41.536 | 4.141  | 22.896 |
| H | 40.442 | 4.552  | 23.858 |
| O | 44.248 | 2.022  | 16.891 |
| H | 44.534 | 1.219  | 17.327 |
| H | 44.894 | 2.679  | 17.15  |
| O | 33.258 | -1.937 | 19.183 |
| H | 32.572 | -2.602 | 19.128 |
| H | 33.37  | -1.785 | 20.122 |
| O | 32.894 | 12.69  | 23.672 |
| H | 33.35  | 12.006 | 23.182 |
| H | 32.658 | 12.274 | 24.501 |
| O | 35.064 | 7.857  | 20.544 |

|   |        |        |        |
|---|--------|--------|--------|
| H | 34.388 | 8.244  | 19.987 |
| H | 34.589 | 7.247  | 21.108 |
| O | 40.375 | 7.535  | 25.324 |
| H | 40.765 | 8.188  | 25.905 |
| H | 40.849 | 7.635  | 24.499 |
| O | 34.365 | 4.894  | 16.032 |
| H | 34.686 | 4.02   | 16.251 |
| H | 35.088 | 5.302  | 15.554 |
| O | 35.991 | 6.197  | 8.95   |
| H | 36.111 | 7.141  | 9.052  |
| H | 35.075 | 6.099  | 8.689  |
| O | 34.542 | 4.493  | 33.71  |
| H | 35.421 | 4.124  | 33.627 |
| H | 34.268 | 4.663  | 32.809 |
| O | 33.083 | 2.766  | 6.992  |
| H | 32.984 | 2.652  | 7.937  |
| H | 33.86  | 2.252  | 6.769  |
| O | 43.474 | 8.965  | 8.115  |
| H | 43.252 | 8.313  | 8.78   |
| H | 43.425 | 9.803  | 8.575  |
| O | 27.07  | 8.136  | 24.37  |
| H | 26.619 | 7.625  | 25.043 |
| H | 27.164 | 7.533  | 23.633 |
| O | 35.912 | -1.102 | 29.25  |
| H | 36.257 | -1.553 | 28.479 |
| H | 35.07  | -1.527 | 29.418 |
| O | 55.965 | 8.525  | 27.198 |
| H | 56.362 | 8.279  | 26.363 |
| H | 55.066 | 8.203  | 27.141 |
| O | 47.88  | 3.707  | 12.22  |
| H | 47.144 | 3.714  | 11.609 |
| H | 48.248 | 2.826  | 12.142 |
| O | 44.596 | -2.4   | 27.834 |
| H | 44.257 | -1.553 | 28.125 |
| H | 45.444 | -2.481 | 28.269 |
| O | 45.83  | 7.45   | 11.061 |
| H | 46.567 | 6.952  | 11.415 |
| H | 45.849 | 8.279  | 11.54  |
| O | 36.53  | 7.064  | 11.834 |
| H | 35.907 | 7.791  | 11.788 |
| H | 36.084 | 6.399  | 12.358 |
| O | 36.046 | 11.811 | 11.387 |
| H | 36.745 | 11.384 | 10.891 |
| H | 35.377 | 11.134 | 11.49  |
| O | 33.593 | -4.489 | 11.202 |
| H | 33.916 | -3.674 | 11.586 |
| H | 34.335 | -4.827 | 10.701 |



|   |        |         |        |
|---|--------|---------|--------|
| O | 38.466 | -1.313  | 6.596  |
| H | 38.665 | -0.433  | 6.278  |
| H | 38.727 | -1.892  | 5.88   |
| O | 39.028 | 12.112  | 26.7   |
| H | 39.216 | 11.716  | 25.85  |
| H | 39.432 | 12.978  | 26.655 |
| O | 37.69  | 6.588   | 25.728 |
| H | 37.846 | 5.659   | 25.561 |
| H | 38.524 | 7.011   | 25.523 |
| O | 44.131 | -0.246  | 14.291 |
| H | 44.094 | -0.687  | 13.442 |
| H | 45.016 | 0.115   | 14.336 |
| O | 44.887 | 7.229   | 31.166 |
| H | 44.741 | 6.851   | 32.034 |
| H | 45.16  | 6.488   | 30.626 |
| O | 26.424 | 10.102  | 19.094 |
| H | 26.18  | 11.014  | 18.937 |
| H | 27.377 | 10.122  | 19.187 |
| O | 47.461 | 0.684   | 16.594 |
| H | 46.644 | 0.45    | 17.034 |
| H | 47.896 | 1.284   | 17.2   |
| O | 25.399 | 10.881  | 26.016 |
| H | 26.057 | 10.57   | 25.394 |
| H | 24.578 | 10.863  | 25.524 |
| O | 35.831 | 5.27    | 29.16  |
| H | 36.617 | 4.751   | 29.329 |
| H | 35.752 | 5.282   | 28.206 |
| O | 36.579 | 13.765  | 8.709  |
| H | 36.683 | 12.825  | 8.566  |
| H | 36.61  | 14.146  | 7.831  |
| O | 30.714 | 1.227   | 17.307 |
| H | 30.739 | 0.277   | 17.197 |
| H | 30.797 | 1.573   | 16.418 |
| O | 47.498 | 14.335  | 15.242 |
| H | 47.765 | 15.236  | 15.423 |
| H | 46.592 | 14.41   | 14.941 |
| O | 31.853 | 13.415  | 17.653 |
| H | 32.193 | 13.07   | 16.827 |
| H | 31.457 | 12.657  | 18.083 |
| O | 45.928 | -3.002  | 16.053 |
| H | 45.272 | -3.648  | 15.789 |
| H | 46.089 | -2.487  | 15.262 |
| O | 37.208 | -3.306  | 8.191  |
| H | 36.409 | -2.978  | 8.604  |
| H | 37.571 | -2.547  | 7.735  |
| O | 30.264 | -12.18  | 15.272 |
| H | 29.854 | -12.055 | 16.128 |

|   |        |        |        |
|---|--------|--------|--------|
| H | 29.574 | -12.56 | 14.729 |
| O | 39.913 | 5.408  | 20.545 |
| H | 38.995 | 5.153  | 20.449 |
| H | 40.083 | 5.34   | 21.484 |
| O | 29.118 | 1.824  | 21.558 |
| H | 28.337 | 2.24   | 21.924 |
| H | 29.429 | 2.44   | 20.895 |
| O | 33.295 | 8.294  | 13.653 |
| H | 33.726 | 8.746  | 12.928 |
| H | 32.439 | 8.045  | 13.305 |
| O | 33.296 | 10.894 | 30.512 |
| H | 33.557 | 10.066 | 30.11  |
| H | 33.727 | 10.892 | 31.367 |
| O | 32.714 | 10.348 | 15.419 |
| H | 31.772 | 10.187 | 15.468 |
| H | 33.1   | 9.479  | 15.308 |
| O | 41.726 | 11.039 | 34.727 |
| H | 41.646 | 11.988 | 34.637 |
| H | 42.055 | 10.909 | 35.617 |
| O | 45.368 | 5.353  | 28.945 |
| H | 45.789 | 4.748  | 29.555 |
| H | 45.901 | 6.146  | 28.988 |
| O | 43.488 | 10.395 | 11.136 |
| H | 43.885 | 11.251 | 10.976 |
| H | 44.188 | 9.878  | 11.536 |
| O | 36.611 | 5.801  | 37.271 |
| H | 37.424 | 5.312  | 37.144 |
| H | 36.872 | 6.72   | 37.21  |
| O | 40.394 | -1.23  | 13.547 |
| H | 40.729 | -0.53  | 12.987 |
| H | 40.484 | -0.888 | 14.437 |
| O | 44.357 | 7.138  | 25.949 |
| H | 44.532 | 6.629  | 25.157 |
| H | 44.064 | 7.99   | 25.626 |
| O | 37.504 | -0.289 | 13.856 |
| H | 38.055 | -0.853 | 14.398 |
| H | 37.819 | -0.433 | 12.963 |
| O | 39.818 | 10.675 | 28.932 |
| H | 40.283 | 10.992 | 29.706 |
| H | 39.578 | 11.47  | 28.455 |
| O | 36.658 | 7.232  | 18.076 |
| H | 36.285 | 7.68   | 18.834 |
| H | 35.91  | 7.068  | 17.502 |
| O | 34.954 | -0.665 | 14.347 |
| H | 35.842 | -0.437 | 14.073 |
| H | 35.017 | -0.781 | 15.295 |
| O | 37.718 | 10.174 | 9.413  |

|   |        |        |        |
|---|--------|--------|--------|
| H | 38.077 | 10.094 | 8.529  |
| H | 38.329 | 9.687  | 9.965  |
| O | 40.519 | 5.451  | 33.211 |
| H | 41.287 | 5.155  | 32.723 |
| H | 40.848 | 6.154  | 33.771 |
| O | 42.981 | -0.351 | 34.439 |
| H | 42.856 | -0.83  | 35.258 |
| H | 42.113 | -0.331 | 34.038 |
| O | 44.839 | 0.654  | 23.129 |
| H | 44.504 | 0.052  | 23.794 |
| H | 44.48  | 0.325  | 22.305 |
| O | 41.714 | -5.182 | 24.05  |
| H | 41.353 | -5.528 | 23.234 |
| H | 40.947 | -4.951 | 24.573 |
| O | 46.846 | 4.951  | 24.168 |
| H | 47.259 | 4.99   | 25.031 |
| H | 46.881 | 4.025  | 23.927 |
| O | 34.712 | 14.155 | 25.585 |
| H | 34.955 | 15.077 | 25.5   |
| H | 33.908 | 14.071 | 25.072 |
| O | 36.876 | 9.554  | 26.708 |
| H | 36.176 | 8.9    | 26.71  |
| H | 37.614 | 9.115  | 27.131 |
| O | 42.181 | 9.961  | 14.655 |
| H | 41.358 | 10.284 | 15.021 |
| H | 42.818 | 10.076 | 15.361 |
| O | 36.998 | 11.979 | 13.896 |
| H | 37.35  | 12.862 | 14.003 |
| H | 36.743 | 11.933 | 12.975 |
| O | 39.353 | 0.448  | 24.71  |
| H | 39.104 | 0.864  | 25.535 |
| H | 38.773 | -0.311 | 24.64  |
| O | 39.365 | 10.803 | 14.027 |
| H | 39.629 | 11.052 | 14.913 |
| H | 38.445 | 11.064 | 13.969 |
| O | 27.077 | 10.647 | 22.954 |
| H | 26.56  | 10.335 | 22.211 |
| H | 27.282 | 9.856  | 23.452 |
| O | 52.608 | 13.061 | 24.926 |
| H | 53.081 | 13.543 | 24.248 |
| H | 52.486 | 12.186 | 24.557 |
| O | 43.313 | 14.227 | 8.899  |
| H | 42.708 | 13.553 | 8.589  |
| H | 42.772 | 14.806 | 9.435  |
| O | 46.29  | -2.82  | 10.775 |
| H | 46.465 | -3.713 | 10.479 |
| H | 46.766 | -2.744 | 11.603 |

|   |        |        |        |
|---|--------|--------|--------|
| O | 32.845 | -5.369 | 15.38  |
| H | 33.653 | -4.86  | 15.322 |
| H | 32.155 | -4.753 | 15.133 |
| O | 51.502 | 4.756  | 21.164 |
| H | 51.232 | 4.996  | 20.277 |
| H | 50.682 | 4.692  | 21.655 |
| O | 48.115 | 9.025  | 20.069 |
| H | 48.55  | 9.791  | 20.444 |
| H | 47.65  | 8.629  | 20.806 |
| O | 46.334 | 4.205  | 17.593 |
| H | 45.997 | 4.407  | 16.72  |
| H | 46.023 | 4.925  | 18.142 |
| O | 45.27  | -0.472 | 17.547 |
| H | 45.643 | -1.284 | 17.206 |
| H | 44.615 | -0.758 | 18.184 |
| O | 37.049 | 2.892  | 15.494 |
| H | 36.517 | 2.508  | 16.192 |
| H | 37.514 | 2.148  | 15.112 |
| O | 43.938 | -6.149 | 37.584 |
| H | 43.377 | -6.891 | 37.806 |
| H | 44.646 | -6.531 | 37.064 |
| O | 38.544 | 1.58   | 22.208 |
| H | 39.227 | 1.469  | 22.869 |
| H | 39.013 | 1.569  | 21.374 |
| O | 44.307 | 15.805 | 11.897 |
| H | 43.471 | 15.945 | 11.453 |
| H | 44.599 | 16.683 | 12.141 |
| O | 30.046 | 9.442  | 21.181 |
| H | 29.516 | 9.39   | 20.386 |
| H | 30.193 | 10.379 | 21.31  |
| O | 38.694 | 11.073 | 18.919 |
| H | 37.739 | 11.006 | 18.926 |
| H | 38.972 | 10.605 | 19.706 |
| O | 52.132 | 16.553 | 26.656 |
| H | 51.836 | 17.208 | 27.288 |
| H | 52.013 | 15.716 | 27.105 |
| O | 33.702 | 13.288 | 28.268 |
| H | 33.716 | 13.455 | 27.325 |
| H | 34.568 | 12.929 | 28.46  |
| O | 50.982 | 10.446 | 16.734 |
| H | 50.45  | 11.168 | 16.401 |
| H | 50.642 | 9.671  | 16.286 |
| O | 30.189 | 9.589  | 29.003 |
| H | 30.056 | 10.465 | 28.641 |
| H | 30.143 | 9.712  | 29.951 |
| O | 36.268 | 16.43  | 17.888 |
| H | 36.345 | 15.949 | 17.065 |

|   |        |        |        |
|---|--------|--------|--------|
| H | 35.354 | 16.315 | 18.149 |
| O | 40.785 | 9.749  | 20.427 |
| H | 40.698 | 9.08   | 19.748 |
| H | 41.227 | 9.302  | 21.148 |
| O | 23.907 | 8.393  | 23.815 |
| H | 24.259 | 8.412  | 24.705 |
| H | 24.647 | 8.64   | 23.26  |
| O | 34.987 | 13.491 | 19.403 |
| H | 35.227 | 14.314 | 19.829 |
| H | 34.622 | 13.757 | 18.559 |
| O | 37.864 | 13.215 | 30.59  |
| H | 38.731 | 13.32  | 30.199 |
| H | 37.305 | 12.939 | 29.863 |
| O | 40.951 | 12.773 | 7.986  |
| H | 40.698 | 12.024 | 8.525  |
| H | 41.547 | 12.407 | 7.332  |
| O | 29.876 | 10.359 | 15.762 |
| H | 29.398 | 9.625  | 15.378 |
| H | 29.2   | 11.003 | 15.972 |
| O | 41.686 | 5.863  | 12.452 |
| H | 41.278 | 6.584  | 12.932 |
| H | 41.112 | 5.114  | 12.612 |
| O | 43.097 | 8.893  | 29.438 |
| H | 43.683 | 8.526  | 30.1   |
| H | 42.276 | 8.414  | 29.553 |
| O | 41.355 | 9.405  | 5.457  |
| H | 42.039 | 8.825  | 5.124  |
| H | 40.57  | 8.858  | 5.487  |
| O | 41.86  | 5.983  | 3.331  |
| H | 41.624 | 6.69   | 2.73   |
| H | 42.228 | 5.302  | 2.767  |
| O | 31.477 | -1.431 | 5.577  |
| H | 32.01  | -2.138 | 5.213  |
| H | 31.857 | -0.632 | 5.212  |
| O | 44.677 | 5.8    | 2.123  |
| H | 44.335 | 6.46   | 1.52   |
| H | 45.288 | 5.286  | 1.594  |
| O | 38.87  | 0.457  | 9.157  |
| H | 38.875 | -0.459 | 8.879  |
| H | 38.818 | 0.954  | 8.341  |
| O | 27.589 | 2.354  | -1.037 |
| H | 26.726 | 1.941  | -1.016 |
| H | 27.409 | 3.29   | -0.949 |
| O | 49.926 | 11.902 | 5.909  |
| H | 49.782 | 12.458 | 5.144  |
| H | 50.146 | 12.514 | 6.612  |
| O | 43.207 | 14.211 | -1.978 |

|   |        |        |        |
|---|--------|--------|--------|
| H | 42.427 | 14.637 | -1.621 |
| H | 43.294 | 13.405 | -1.469 |
| O | 34.185 | 5.209  | 6.802  |
| H | 34.852 | 5.153  | 6.118  |
| H | 33.826 | 4.324  | 6.861  |
| O | 35.268 | 11.027 | 2.788  |
| H | 34.587 | 11.588 | 2.417  |
| H | 35.405 | 10.348 | 2.127  |
| O | 39.469 | 0.677  | 1.165  |
| H | 39.803 | -0.22  | 1.153  |
| H | 38.796 | 0.692  | 0.485  |
| O | 41.101 | 8.929  | 2.439  |
| H | 41.949 | 9.366  | 2.35   |
| H | 40.99  | 8.452  | 1.617  |
| O | 46.399 | 2.241  | 3.609  |
| H | 46.636 | 1.983  | 2.718  |
| H | 46.9   | 1.651  | 4.171  |
| O | 50.989 | 4.333  | 3.054  |
| H | 50.125 | 4.098  | 3.392  |
| H | 50.971 | 4.059  | 2.137  |
| O | 38.294 | 6.852  | 1.994  |
| H | 38.527 | 6.314  | 1.237  |
| H | 38.518 | 6.31   | 2.751  |
| O | 35.502 | 11.905 | 6.88   |
| H | 35.948 | 12.168 | 6.075  |
| H | 35.183 | 11.021 | 6.7    |
| O | 53.142 | 8.541  | 6.676  |
| H | 53.807 | 9.204  | 6.862  |
| H | 53.621 | 7.84   | 6.234  |
| O | 34.354 | 9.522  | 11.182 |
| H | 34.654 | 9.402  | 10.281 |
| H | 33.446 | 9.812  | 11.096 |
| O | 34.372 | 3.618  | -0.272 |
| H | 33.587 | 3.126  | -0.033 |
| H | 34.255 | 4.473  | 0.143  |
| O | 40.553 | 10.406 | 9.351  |
| H | 40.446 | 10.242 | 10.288 |
| H | 40.367 | 9.563  | 8.938  |
| O | 48.556 | 6.466  | 11.122 |
| H | 48.808 | 5.543  | 11.147 |
| H | 48.591 | 6.698  | 10.195 |
| O | 29.596 | 8.548  | 4.581  |
| H | 29.343 | 7.648  | 4.374  |
| H | 28.773 | 8.983  | 4.803  |
| O | 46.132 | 3.115  | 6.83   |
| H | 46.429 | 3.757  | 7.476  |
| H | 45.472 | 3.58   | 6.316  |

|   |        |        |        |
|---|--------|--------|--------|
| O | 33.404 | 13.102 | 8.308  |
| H | 34.222 | 12.768 | 7.939  |
| H | 33.575 | 13.171 | 9.247  |
| O | 29.828 | 9.012  | 9.605  |
| H | 29.124 | 8.383  | 9.448  |
| H | 29.754 | 9.227  | 10.535 |
| O | 38.627 | 1.902  | 6.755  |
| H | 38.686 | 2.652  | 7.348  |
| H | 39.411 | 1.967  | 6.209  |
| O | 36.367 | -4.138 | 3.49   |
| H | 36.161 | -4.927 | 2.991  |
| H | 36.534 | -4.453 | 4.379  |
| O | 35.5   | 1.838  | 5.914  |
| H | 36.088 | 1.81   | 6.669  |
| H | 35.908 | 2.465  | 5.316  |
| O | 35.805 | 6.435  | -0.027 |
| H | 35.889 | 7.32   | 0.328  |
| H | 36.705 | 6.111  | -0.078 |
| O | 36.884 | -3.568 | 0.971  |
| H | 36.776 | -2.641 | 0.756  |
| H | 36.79  | -3.605 | 1.923  |
| O | 47.272 | -2.052 | -4.96  |
| H | 46.711 | -2.451 | -4.295 |
| H | 47.53  | -1.211 | -4.582 |
| O | 41.913 | 3.056  | 6.867  |
| H | 41.996 | 3.072  | 5.913  |
| H | 42.782 | 2.803  | 7.179  |
| O | 37.76  | -6.626 | 2.548  |
| H | 38.086 | -7.397 | 2.084  |
| H | 38.104 | -6.719 | 3.437  |
| O | 27.936 | -3.202 | 4.796  |
| H | 28.738 | -2.807 | 4.455  |
| H | 27.264 | -2.532 | 4.664  |
| O | 33.318 | 0.245  | 9.736  |
| H | 33.138 | 1.139  | 10.027 |
| H | 34.063 | 0.332  | 9.142  |
| O | 40.583 | 3.263  | 13.073 |
| H | 40.481 | 2.737  | 12.28  |
| H | 41.114 | 2.719  | 13.655 |
| O | 43.08  | -1.1   | 2.466  |
| H | 42.798 | -0.952 | 3.368  |
| H | 42.984 | -0.247 | 2.042  |
| O | 46.087 | 1.607  | 0.193  |
| H | 45.198 | 1.925  | 0.033  |
| H | 46.321 | 1.136  | -0.606 |
| O | 39.037 | 8.049  | 10.916 |
| H | 38.145 | 7.712  | 10.999 |

|   |        |        |        |
|---|--------|--------|--------|
| H | 39.497 | 7.7    | 11.68  |
| O | 35.342 | -0.518 | 4.548  |
| H | 35.372 | 0.209  | 5.17   |
| H | 35.484 | -1.298 | 5.083  |
| O | 42.16  | 16.726 | 4.689  |
| H | 41.768 | 16.192 | 3.998  |
| H | 41.614 | 16.561 | 5.458  |
| O | 27.499 | 10.385 | 5.531  |
| H | 26.734 | 10.057 | 6.005  |
| H | 28.198 | 10.399 | 6.185  |
| O | 42.343 | 14.653 | 15.075 |
| H | 42.714 | 15.498 | 15.331 |
| H | 41.812 | 14.848 | 14.304 |
| O | 46.24  | -2.766 | 2.293  |
| H | 45.749 | -3.54  | 2.57   |
| H | 45.58  | -2.189 | 1.909  |
| O | 36.617 | 9.137  | 1.309  |
| H | 37.08  | 8.371  | 1.649  |
| H | 37.295 | 9.806  | 1.219  |
| O | 32.048 | 10.264 | 5.659  |
| H | 31.362 | 9.753  | 5.228  |
| H | 31.59  | 10.742 | 6.351  |
| O | 29.927 | 2.988  | 11.558 |
| H | 30.646 | 3.488  | 11.171 |
| H | 29.224 | 3.041  | 10.911 |
| O | 46.613 | 5.309  | 8.345  |
| H | 47.537 | 5.37   | 8.588  |
| H | 46.206 | 6.07   | 8.759  |
| O | 46.198 | 10.101 | 12.207 |
| H | 45.879 | 10.503 | 13.015 |
| H | 46.441 | 10.84  | 11.65  |
| O | 29.015 | -0.49  | 11.8   |
| H | 28.567 | -0.25  | 10.989 |
| H | 29.062 | -1.445 | 11.775 |
| O | 43.112 | 7.277  | 10.237 |
| H | 44.068 | 7.323  | 10.26  |
| H | 42.867 | 6.951  | 11.102 |
| O | 48.909 | -0.069 | 12.703 |
| H | 49.691 | 0.335  | 12.327 |
| H | 48.572 | -0.633 | 12.007 |
| O | 35.877 | 0.957  | 8.959  |
| H | 36.679 | 0.55   | 9.288  |
| H | 36.008 | 1.894  | 9.101  |
| O | 38.126 | -1.007 | 11.379 |
| H | 38.826 | -1.638 | 11.213 |
| H | 38.384 | -0.227 | 10.889 |
| O | 41.768 | -0.327 | 6.333  |



|   |        |        |        |
|---|--------|--------|--------|
| H | 42.143 | -1.05  | 5.83   |
| H | 41.244 | 0.16   | 5.698  |
| O | 39.632 | 4.252  | 7.615  |
| H | 40.473 | 3.836  | 7.426  |
| H | 39.854 | 5.003  | 8.166  |
| O | 35.847 | 5.022  | 4.466  |
| H | 35.992 | 4.287  | 3.87   |
| H | 36.669 | 5.105  | 4.948  |
| O | 43.954 | 3.453  | 4.341  |
| H | 44.613 | 3.178  | 3.704  |
| H | 43.749 | 4.357  | 4.099  |
| O | 38.703 | 9.239  | 7.151  |
| H | 37.926 | 9.269  | 6.594  |
| H | 39.216 | 8.507  | 6.808  |
| O | 29.87  | 11.038 | 12.089 |
| H | 30.482 | 11.498 | 12.665 |
| H | 29.139 | 11.647 | 11.982 |
| O | 26.034 | 9.779  | 2.627  |
| H | 26.349 | 10.061 | 1.768  |
| H | 25.74  | 10.585 | 3.05   |
| O | 24.044 | 12.07  | 3.17   |
| H | 23.447 | 11.523 | 2.66   |
| H | 24.661 | 12.417 | 2.526  |
| O | 48.682 | -1.763 | 0.478  |
| H | 48.737 | -1.444 | -0.423 |
| H | 48.077 | -2.503 | 0.433  |
| O | 36.778 | -0.633 | 1.434  |
| H | 36.269 | -0.755 | 2.236  |
| H | 36.532 | 0.239  | 1.125  |
| O | 55.413 | 10.814 | 3.587  |
| H | 55.804 | 10.933 | 4.453  |
| H | 56.119 | 11.019 | 2.975  |
| O | 35.899 | 3.656  | 9.876  |
| H | 35.988 | 4.576  | 9.628  |
| H | 36.14  | 3.633  | 10.802 |
| O | 27.387 | 3.802  | 2.142  |
| H | 27.173 | 4.439  | 1.46   |
| H | 26.713 | 3.127  | 2.058  |
| O | 47.102 | 1.4    | 9.619  |
| H | 46.378 | 2.012  | 9.756  |
| H | 47.745 | 1.899  | 9.115  |
| O | 45.632 | 3.46   | 10.373 |
| H | 45.378 | 4.015  | 9.636  |
| H | 45.011 | 3.684  | 11.066 |
| O | 34.672 | 9.366  | 6.335  |
| H | 33.923 | 9.599  | 5.785  |
| H | 34.979 | 8.532  | 5.979  |

|   |        |        |        |
|---|--------|--------|--------|
| O | 37.451 | 5.428  | 6.652  |
| H | 38.366 | 5.218  | 6.839  |
| H | 37.04  | 5.492  | 7.514  |
| O | 45.771 | 13.54  | 4.358  |
| H | 46.614 | 13.39  | 3.93   |
| H | 45.909 | 13.262 | 5.263  |
| O | 26.368 | 7.056  | -4.72  |
| H | 25.472 | 6.754  | -4.869 |
| H | 26.913 | 6.292  | -4.905 |
| O | 45.297 | 10.274 | 6.539  |
| H | 46.019 | 9.714  | 6.254  |
| H | 44.76  | 9.708  | 7.093  |
| O | 25.906 | 6.987  | -1.57  |
| H | 25.972 | 6.869  | -2.518 |
| H | 25.911 | 7.936  | -1.445 |
| O | 46.751 | 16.099 | -0.21  |
| H | 46.468 | 15.191 | -0.107 |
| H | 46.225 | 16.433 | -0.936 |
| O | 34.49  | 6.896  | -2.598 |
| H | 34.604 | 7.834  | -2.749 |
| H | 35.038 | 6.707  | -1.837 |
| O | 31.986 | 12.136 | 13.623 |
| H | 32.284 | 13.009 | 13.877 |
| H | 32.389 | 11.549 | 14.263 |
| O | 45.498 | 11.558 | 14.443 |
| H | 45.11  | 12.161 | 13.808 |
| H | 46.017 | 12.119 | 15.019 |
| O | 18.27  | 57.542 | 55.506 |
| H | 18.309 | 56.596 | 55.645 |
| H | 18.564 | 57.919 | 56.335 |
| O | 19.598 | 56.643 | 63.378 |
| H | 18.968 | 56.435 | 62.688 |
| H | 19.227 | 56.251 | 64.168 |
| O | 21.655 | 61.457 | 58.928 |
| H | 21.967 | 61.209 | 59.798 |
| H | 21.494 | 62.399 | 58.991 |
| O | 13.129 | 49.376 | 57.053 |
| H | 12.792 | 50.206 | 57.389 |
| H | 12.495 | 49.112 | 56.386 |
| O | 16.381 | 54.76  | 54.047 |
| H | 16.718 | 54.295 | 53.281 |
| H | 17.098 | 54.73  | 54.68  |
| O | 16.285 | 53.227 | 61.75  |
| H | 16.401 | 53.085 | 60.811 |
| H | 16.578 | 52.41  | 62.154 |
| O | 16.776 | 60.351 | 59.394 |
| H | 16.182 | 60.547 | 60.119 |

|   |        |        |        |
|---|--------|--------|--------|
| H | 16.292 | 59.732 | 58.848 |
| O | 18.412 | 51.176 | 55.735 |
| H | 19.183 | 51.335 | 55.19  |
| H | 17.682 | 51.152 | 55.116 |
| O | 11.489 | 49.514 | 59.797 |
| H | 11.412 | 48.689 | 59.317 |
| H | 11.591 | 49.25  | 60.711 |
| O | 24.672 | 50.02  | 58.501 |
| H | 24.971 | 50.857 | 58.857 |
| H | 25.477 | 49.524 | 58.348 |
| O | 32.773 | 57.705 | 50.614 |
| H | 32.931 | 58.276 | 49.862 |
| H | 33.323 | 56.938 | 50.452 |
| O | 36.02  | 50.657 | 52.26  |
| H | 36.827 | 50.232 | 52.549 |
| H | 36.293 | 51.226 | 51.54  |
| O | 16.302 | 48.703 | 61.405 |
| H | 15.455 | 49.122 | 61.255 |
| H | 16.862 | 49.405 | 61.736 |
| O | 18.853 | 58.569 | 58.135 |
| H | 18.927 | 59.327 | 58.715 |
| H | 18.287 | 57.959 | 58.608 |
| O | 25.761 | 56.977 | 56.086 |
| H | 25.872 | 57.317 | 56.974 |
| H | 26.565 | 56.485 | 55.916 |
| O | 29.96  | 55.593 | 47.591 |
| H | 29.366 | 55.217 | 46.942 |
| H | 30.102 | 56.492 | 47.295 |
| O | 17.905 | 52.657 | 58.958 |
| H | 17.662 | 51.731 | 58.956 |
| H | 17.457 | 53.024 | 58.196 |
| O | 20.601 | 54.594 | 57.494 |
| H | 20.882 | 53.699 | 57.685 |
| H | 21.354 | 55.137 | 57.727 |
| O | 29.924 | 53.379 | 49.1   |
| H | 30.133 | 54.242 | 48.741 |
| H | 29.214 | 53.056 | 48.546 |
| O | 16.885 | 53.715 | 47.037 |
| H | 16.15  | 53.909 | 47.619 |
| H | 17.347 | 54.549 | 46.948 |
| O | 11.954 | 55.17  | 57.372 |
| H | 12.213 | 54.892 | 58.251 |
| H | 12.711 | 54.966 | 56.824 |
| O | 10.394 | 44.323 | 55.331 |
| H | 9.872  | 44.625 | 56.074 |
| H | 10.639 | 45.126 | 54.87  |
| O | 21.658 | 54.108 | 49.678 |

|   |        |        |        |
|---|--------|--------|--------|
| H | 22.33  | 53.877 | 50.319 |
| H | 22.022 | 53.828 | 48.838 |
| O | 21.641 | 49.042 | 59.159 |
| H | 21.85  | 49.245 | 60.071 |
| H | 20.905 | 49.616 | 58.948 |
| O | 12.599 | 54.499 | 49.012 |
| H | 13.509 | 54.365 | 49.276 |
| H | 12.088 | 54.013 | 49.659 |
| O | 19.212 | 55.043 | 49.974 |
| H | 20.091 | 54.712 | 49.789 |
| H | 19.358 | 55.873 | 50.426 |
| O | 27.232 | 47.392 | 54.927 |
| H | 26.605 | 46.79  | 54.527 |
| H | 27.064 | 47.323 | 55.867 |
| O | 11.306 | 52.098 | 58.423 |
| H | 11.145 | 51.224 | 58.777 |
| H | 10.496 | 52.578 | 58.593 |
| O | 14.149 | 55.053 | 55.555 |
| H | 15.014 | 55.014 | 55.148 |
| H | 13.582 | 55.423 | 54.878 |
| O | 23.312 | 53.555 | 58.058 |
| H | 23.018 | 52.815 | 58.588 |
| H | 24.261 | 53.58  | 58.186 |
| O | 18.236 | 55.038 | 56.383 |
| H | 18.852 | 55.064 | 57.115 |
| H | 17.574 | 54.401 | 56.65  |
| O | 9.15   | 55.46  | 47.753 |
| H | 8.991  | 54.573 | 48.074 |
| H | 9.485  | 55.337 | 46.865 |
| O | 10.554 | 57.824 | 55.716 |
| H | 9.607  | 57.69  | 55.678 |
| H | 10.71  | 58.188 | 56.587 |
| O | 27.41  | 46.534 | 58.608 |
| H | 27.154 | 47.453 | 58.694 |
| H | 28.18  | 46.447 | 59.17  |
| O | 14.623 | 60.493 | 50.34  |
| H | 15.564 | 60.335 | 50.417 |
| H | 14.23  | 59.932 | 51.008 |
| O | 6.848  | 53.268 | 57.811 |
| H | 5.903  | 53.143 | 57.894 |
| H | 6.985  | 53.446 | 56.88  |
| O | 22.979 | 56.908 | 50.676 |
| H | 22.026 | 56.927 | 50.587 |
| H | 23.13  | 56.788 | 51.614 |
| O | 17.559 | 56.792 | 59.635 |
| H | 17.522 | 56.393 | 60.504 |
| H | 16.869 | 56.351 | 59.139 |

|   |        |        |        |
|---|--------|--------|--------|
| O | 18.307 | 49.994 | 51.538 |
| H | 19.194 | 50.267 | 51.773 |
| H | 18.423 | 49.437 | 50.769 |
| O | 23.438 | 52.995 | 55.011 |
| H | 24.112 | 53.531 | 54.594 |
| H | 23.689 | 52.969 | 55.934 |
| O | 24.387 | 52.931 | 50.675 |
| H | 24.712 | 52.545 | 49.861 |
| H | 24.79  | 53.798 | 50.707 |
| O | 3.481  | 54.376 | 56.164 |
| H | 4.171  | 53.895 | 55.707 |
| H | 3.67   | 55.297 | 55.981 |
| O | 20.675 | 60.388 | 49.455 |
| H | 19.895 | 60.335 | 50.008 |
| H | 20.433 | 59.922 | 48.655 |
| O | 15.595 | 47.626 | 57.059 |
| H | 14.907 | 48.271 | 56.892 |
| H | 15.166 | 46.78  | 56.936 |
| O | 10.866 | 53.294 | 55.581 |
| H | 10.729 | 52.353 | 55.686 |
| H | 11.067 | 53.607 | 56.463 |
| O | 28.006 | 51.497 | 53.003 |
| H | 27.704 | 50.857 | 52.358 |
| H | 28.816 | 51.847 | 52.632 |
| O | 15.698 | 55.963 | 57.93  |
| H | 15.088 | 55.252 | 58.127 |
| H | 15.59  | 56.118 | 56.992 |
| O | 24.135 | 47.314 | 59.483 |
| H | 23.912 | 48.23  | 59.314 |
| H | 23.64  | 46.823 | 58.828 |
| O | 26.07  | 47.983 | 45.398 |
| H | 26.618 | 48.768 | 45.386 |
| H | 26.423 | 47.457 | 46.116 |
| O | 28.447 | 56.063 | 55.235 |
| H | 28.381 | 55.124 | 55.063 |
| H | 28.692 | 56.121 | 56.158 |
| O | 8.731  | 56.196 | 52.125 |
| H | 8.653  | 57.031 | 51.664 |
| H | 9.334  | 56.376 | 52.846 |
| O | 18.551 | 59.894 | 50.921 |
| H | 18.063 | 60.491 | 51.488 |
| H | 17.889 | 59.295 | 50.577 |
| O | 15.303 | 57.474 | 47.789 |
| H | 15.19  | 57.972 | 46.979 |
| H | 14.411 | 57.296 | 48.087 |
| O | 21.058 | 56.916 | 59.152 |
| H | 20.146 | 56.984 | 58.87  |

|   |        |        |        |
|---|--------|--------|--------|
| H | 21.106 | 57.455 | 59.941 |
| O | 23.085 | 56.383 | 47.883 |
| H | 23.948 | 56.634 | 48.213 |
| H | 22.519 | 56.4   | 48.654 |
| O | 20.557 | 44.577 | 55.285 |
| H | 19.758 | 44.86  | 54.84  |
| H | 21.246 | 45.127 | 54.912 |
| O | 17.727 | 51.814 | 45.713 |
| H | 18.632 | 52.097 | 45.844 |
| H | 17.206 | 52.431 | 46.226 |
| O | 22.722 | 49.082 | 53.911 |
| H | 22.892 | 49.493 | 54.758 |
| H | 22.909 | 49.767 | 53.27  |
| O | 28.369 | 58.827 | 55.398 |
| H | 29.32  | 58.718 | 55.431 |
| H | 28.035 | 57.951 | 55.206 |
| O | 9.039  | 53.743 | 50.824 |
| H | 8.084  | 53.767 | 50.886 |
| H | 9.331  | 54.506 | 51.322 |
| O | 29.761 | 62.899 | 49.659 |
| H | 28.868 | 62.668 | 49.912 |
| H | 29.749 | 62.893 | 48.702 |
| O | 26.097 | 46.394 | 49.155 |
| H | 25.95  | 47.312 | 49.385 |
| H | 25.447 | 45.912 | 49.666 |
| O | 29.201 | 49.055 | 48.929 |
| H | 28.945 | 48.459 | 48.226 |
| H | 28.958 | 48.596 | 49.733 |
| O | 5.187  | 57.743 | 53.38  |
| H | 5.993  | 58.233 | 53.543 |
| H | 5.467  | 56.828 | 53.339 |
| O | 31.109 | 50.882 | 50.02  |
| H | 30.278 | 50.516 | 49.717 |
| H | 30.991 | 51.83  | 49.957 |
| O | 17.719 | 49.54  | 47.088 |
| H | 17.788 | 50.337 | 46.563 |
| H | 16.934 | 49.103 | 46.757 |
| O | 10.363 | 52.048 | 48.868 |
| H | 9.871  | 52.2   | 48.061 |
| H | 9.799  | 52.392 | 49.561 |
| O | 24.494 | 48.354 | 50.638 |
| H | 24.221 | 49.009 | 49.996 |
| H | 23.681 | 48.084 | 51.065 |
| O | 21.83  | 43.628 | 63.325 |
| H | 21.224 | 44.158 | 62.807 |
| H | 22.672 | 44.078 | 63.241 |
| O | 29.575 | 47.835 | 53.658 |

|   |        |        |        |
|---|--------|--------|--------|
| H | 28.783 | 47.807 | 54.195 |
| H | 30.259 | 48.14  | 54.254 |
| O | 28.988 | 46.297 | 44.378 |
| H | 28.767 | 46.635 | 45.246 |
| H | 28.912 | 45.346 | 44.466 |
| O | 33.576 | 52.278 | 50.361 |
| H | 33.189 | 52.887 | 50.99  |
| H | 32.941 | 51.566 | 50.295 |
| O | 16.832 | 50.889 | 63.321 |
| H | 16.734 | 50.054 | 63.779 |
| H | 16.501 | 51.541 | 63.939 |
| O | 19.311 | 48.058 | 61.093 |
| H | 19.617 | 48.919 | 61.378 |
| H | 18.89  | 48.22  | 60.249 |
| O | 27.732 | 51.702 | 61.413 |
| H | 28.061 | 52.482 | 60.966 |
| H | 28.496 | 51.13  | 61.491 |
| O | 10.88  | 55.553 | 53.819 |
| H | 10.803 | 56.238 | 54.484 |
| H | 10.941 | 54.74  | 54.32  |
| O | 18.486 | 48.959 | 58.695 |
| H | 18.55  | 48.332 | 57.975 |
| H | 17.949 | 49.671 | 58.345 |
| O | 25.672 | 54.112 | 53.72  |
| H | 25.983 | 53.829 | 52.86  |
| H | 26.432 | 54.016 | 54.294 |
| O | 23.873 | 45.812 | 45.183 |
| H | 24.519 | 46.443 | 44.866 |
| H | 23.36  | 46.297 | 45.829 |
| O | 16.114 | 44.218 | 45.355 |
| H | 15.301 | 44.708 | 45.475 |
| H | 15.83  | 43.35  | 45.066 |
| O | 16.166 | 51.012 | 54.193 |
| H | 15.596 | 50.309 | 53.884 |
| H | 15.765 | 51.813 | 53.855 |
| O | 23.194 | 60.138 | 34.602 |
| H | 22.546 | 60.737 | 34.973 |
| H | 22.916 | 60.018 | 33.694 |
| O | 23.39  | 59.545 | 41.617 |
| H | 22.625 | 59.528 | 41.043 |
| H | 23.732 | 58.651 | 41.587 |
| O | 24.948 | 53.874 | 46.048 |
| H | 24.789 | 54.806 | 45.895 |
| H | 25.187 | 53.527 | 45.189 |
| O | 10.666 | 57.355 | 43.251 |
| H | 10.417 | 58.277 | 43.315 |
| H | 10.158 | 56.922 | 43.938 |

|   |        |        |        |
|---|--------|--------|--------|
| O | 18.663 | 58.393 | 40.197 |
| H | 18.338 | 58.681 | 41.05  |
| H | 18.519 | 59.144 | 39.621 |
| O | 21.614 | 54.929 | 44.751 |
| H | 22.182 | 55.68  | 44.926 |
| H | 21.693 | 54.783 | 43.808 |
| O | 30.632 | 51.636 | 35.116 |
| H | 30.177 | 51.936 | 34.33  |
| H | 30.83  | 50.716 | 34.942 |
| O | 19.406 | 57.93  | 29.379 |
| H | 19.794 | 58.647 | 28.878 |
| H | 20.005 | 57.195 | 29.247 |
| O | 28.289 | 55.747 | 39.579 |
| H | 28.8   | 56.42  | 40.029 |
| H | 28.112 | 56.119 | 38.715 |
| O | 5.283  | 54.36  | 40.353 |
| H | 4.853  | 53.62  | 39.924 |
| H | 5.165  | 55.09  | 39.744 |
| O | 16.189 | 63.035 | 38.862 |
| H | 16.064 | 63.918 | 38.513 |
| H | 15.48  | 62.926 | 39.496 |
| O | 39.393 | 61.463 | 44.069 |
| H | 38.49  | 61.768 | 43.986 |
| H | 39.684 | 61.33  | 43.166 |
| O | 16.425 | 54.814 | 35.961 |
| H | 17.284 | 55.228 | 36.041 |
| H | 15.841 | 55.375 | 36.472 |
| O | 30.554 | 56.865 | 40.844 |
| H | 30.933 | 56.402 | 41.591 |
| H | 31.264 | 56.906 | 40.203 |
| O | 20.539 | 52.356 | 39.573 |
| H | 20.316 | 51.457 | 39.815 |
| H | 21.133 | 52.649 | 40.264 |
| O | 27.992 | 58.486 | 46.693 |
| H | 28.698 | 58.468 | 47.339 |
| H | 28.412 | 58.23  | 45.872 |
| O | 26.079 | 49.68  | 38.309 |
| H | 25.463 | 50.323 | 38.658 |
| H | 26.658 | 49.479 | 39.045 |
| O | 24.038 | 60.58  | 50.301 |
| H | 23.833 | 60.398 | 51.218 |
| H | 23.186 | 60.717 | 49.888 |
| O | 20.612 | 58.196 | 36.028 |
| H | 21.413 | 58.467 | 36.476 |
| H | 20.054 | 58.974 | 36.044 |
| O | 18.344 | 48.866 | 28.203 |
| H | 17.425 | 48.745 | 27.964 |



|   |        |        |        |
|---|--------|--------|--------|
| H | 18.552 | 48.108 | 28.749 |
| O | 23.143 | 55.715 | 41.46  |
| H | 22.891 | 54.856 | 41.8   |
| H | 23.918 | 55.543 | 40.926 |
| O | 26.551 | 60.706 | 28.853 |
| H | 25.796 | 60.488 | 28.307 |
| H | 26.235 | 61.401 | 29.431 |
| O | 20.305 | 58.368 | 47.377 |
| H | 21.137 | 58.01  | 47.688 |
| H | 20.395 | 58.387 | 46.424 |
| O | 22.103 | 52.82  | 36.967 |
| H | 21.699 | 52.444 | 37.749 |
| H | 21.585 | 52.474 | 36.24  |
| O | 22.472 | 53.27  | 41.913 |
| H | 23.128 | 52.826 | 42.45  |
| H | 21.638 | 53.069 | 42.338 |
| O | 25.399 | 51.766 | 35.611 |
| H | 25.749 | 52.498 | 36.118 |
| H | 25.238 | 52.132 | 34.741 |
| O | 23.902 | 51.605 | 39.308 |
| H | 24.018 | 52.253 | 38.613 |
| H | 23.074 | 51.174 | 39.099 |
| O | 15.288 | 56.816 | 37.614 |
| H | 14.35  | 56.722 | 37.783 |
| H | 15.684 | 56.866 | 38.484 |
| O | 18.379 | 60.059 | 38.133 |
| H | 18.384 | 60.956 | 37.799 |
| H | 18.162 | 59.521 | 37.372 |
| O | 25.339 | 44.687 | 39.701 |
| H | 24.873 | 45.497 | 39.498 |
| H | 26.002 | 44.946 | 40.341 |
| O | 17.302 | 50.674 | 38.525 |
| H | 17.63  | 51.273 | 37.855 |
| H | 17.825 | 49.88  | 38.415 |
| O | 21.89  | 43.388 | 41.153 |
| H | 22.727 | 42.972 | 40.944 |
| H | 21.606 | 43.783 | 40.329 |
| O | 27.669 | 50.271 | 45.383 |
| H | 28.503 | 49.823 | 45.525 |
| H | 27.769 | 50.699 | 44.533 |
| O | 16.568 | 58.161 | 49.998 |
| H | 16.244 | 57.978 | 49.117 |
| H | 15.891 | 57.814 | 50.579 |
| O | 26.82  | 56.099 | 33.951 |
| H | 27.715 | 56.259 | 34.25  |
| H | 26.857 | 56.231 | 33.004 |
| O | 14.094 | 50.144 | 43.247 |

|   |        |        |        |
|---|--------|--------|--------|
| H | 14.707 | 50.11  | 42.512 |
| H | 13.664 | 50.994 | 43.162 |
| O | 19.593 | 55.17  | 38.582 |
| H | 19.855 | 54.252 | 38.655 |
| H | 20.386 | 55.663 | 38.793 |
| O | 24.521 | 58.803 | 30.42  |
| H | 25.205 | 59.053 | 31.041 |
| H | 24.632 | 57.859 | 30.307 |
| O | 20.56  | 57.71  | 44.751 |
| H | 20.456 | 56.799 | 45.027 |
| H | 19.698 | 57.959 | 44.418 |
| O | 24.954 | 58.397 | 38.648 |
| H | 24.944 | 57.525 | 39.043 |
| H | 25.187 | 58.983 | 39.367 |
| O | 15.457 | 48.033 | 49.606 |
| H | 14.918 | 48.574 | 50.183 |
| H | 15.894 | 48.66  | 49.029 |
| O | 20.074 | 57.408 | 50.982 |
| H | 20.335 | 57.375 | 51.903 |
| H | 19.644 | 58.258 | 50.885 |
| O | 11.54  | 43.975 | 39.363 |
| H | 12.182 | 44.678 | 39.468 |
| H | 11.91  | 43.238 | 39.849 |
| O | 10.222 | 52.05  | 31.695 |
| H | 10.538 | 51.578 | 30.925 |
| H | 11.001 | 52.172 | 32.238 |
| O | 22.476 | 65.628 | 38.571 |
| H | 22.595 | 65.974 | 37.686 |
| H | 23.123 | 64.927 | 38.643 |
| O | 21.002 | 57.78  | 33.171 |
| H | 20.938 | 57.751 | 34.126 |
| H | 20.276 | 57.236 | 32.866 |
| O | 11.405 | 47.991 | 36.122 |
| H | 11.063 | 47.229 | 35.654 |
| H | 12.277 | 47.722 | 36.412 |
| O | 16.396 | 59.099 | 36.303 |
| H | 15.517 | 59.421 | 36.104 |
| H | 16.251 | 58.292 | 36.795 |
| O | 27.578 | 48.875 | 40.385 |
| H | 28.33  | 48.343 | 40.123 |
| H | 27.049 | 48.29  | 40.928 |
| O | 22.865 | 54.052 | 33.29  |
| H | 21.986 | 53.975 | 33.66  |
| H | 23.258 | 54.788 | 33.758 |
| O | 26.509 | 45.135 | 41.866 |
| H | 26.5   | 46     | 42.277 |
| H | 25.895 | 44.617 | 42.386 |

|   |        |        |        |
|---|--------|--------|--------|
| O | 22.302 | 62.638 | 42.207 |
| H | 22.153 | 61.741 | 41.907 |
| H | 21.826 | 62.695 | 43.036 |
| O | 11.872 | 47.67  | 43.167 |
| H | 11.85  | 47.899 | 44.097 |
| H | 12.064 | 48.496 | 42.722 |
| O | 15.404 | 54.618 | 49.489 |
| H | 16.007 | 55.357 | 49.408 |
| H | 15.914 | 53.938 | 49.929 |
| O | 22.24  | 56.995 | 38.731 |
| H | 22.91  | 56.448 | 39.141 |
| H | 22.434 | 56.951 | 37.795 |
| O | 23.116 | 48.907 | 33.387 |
| H | 23.981 | 49.209 | 33.109 |
| H | 22.749 | 48.486 | 32.609 |
| O | 15.651 | 60.501 | 46.542 |
| H | 14.991 | 59.96  | 46.109 |
| H | 16.278 | 60.713 | 45.852 |
| O | 27.183 | 58.088 | 28.907 |
| H | 27.035 | 59.015 | 29.092 |
| H | 27.9   | 58.081 | 28.273 |
| O | 17.33  | 56.05  | 39.696 |
| H | 18.112 | 55.594 | 39.386 |
| H | 17.628 | 56.943 | 39.872 |
| O | 8.827  | 52.152 | 46.835 |
| H | 7.975  | 52.588 | 46.839 |
| H | 8.638  | 51.259 | 46.549 |
| O | 17.276 | 54.346 | 43.106 |
| H | 16.438 | 54.36  | 43.568 |
| H | 17.139 | 54.911 | 42.345 |
| O | 31.966 | 58.891 | 31.577 |
| H | 32.284 | 59.765 | 31.349 |
| H | 31.28  | 59.047 | 32.226 |
| O | 25.818 | 58.588 | 50.061 |
| H | 25.711 | 58.065 | 50.855 |
| H | 25.125 | 59.246 | 50.112 |
| O | 10.699 | 50.185 | 34.531 |
| H | 11.081 | 49.485 | 35.06  |
| H | 9.861  | 50.374 | 34.954 |
| O | 25.618 | 58.688 | 33.227 |
| H | 26.36  | 58.583 | 33.822 |
| H | 25.244 | 57.81  | 33.153 |
| O | 18.45  | 56.312 | 32.229 |
| H | 17.966 | 56.917 | 32.791 |
| H | 18.503 | 56.76  | 31.385 |
| O | 10.698 | 53.797 | 45.299 |
| H | 10.167 | 54.531 | 44.99  |

|   |        |        |        |
|---|--------|--------|--------|
| H | 10.066 | 53.183 | 45.672 |
| O | 17.593 | 58.497 | 33.649 |
| H | 18.266 | 59.176 | 33.591 |
| H | 17.431 | 58.4   | 34.587 |
| O | 19.442 | 49.343 | 37.764 |
| H | 19.617 | 48.437 | 37.509 |
| H | 20.281 | 49.668 | 38.089 |
| O | 23.897 | 58.088 | 36.17  |
| H | 24.338 | 58.442 | 36.943 |
| H | 23.771 | 58.846 | 35.599 |
| O | 18.076 | 62.69  | 36.858 |
| H | 17.32  | 62.452 | 36.322 |
| H | 17.699 | 63.082 | 37.645 |
| O | 22.991 | 49.567 | 46.643 |
| H | 22.096 | 49.87  | 46.492 |
| H | 22.94  | 48.615 | 46.557 |
| O | 27.006 | 60.839 | 36.883 |
| H | 27.589 | 61.08  | 37.604 |
| H | 26.396 | 61.574 | 36.813 |
| O | 10.312 | 47.666 | 31.859 |
| H | 10.431 | 48.135 | 32.685 |
| H | 10.733 | 48.222 | 31.204 |
| O | 34.548 | 57.38  | 44.905 |
| H | 35.351 | 57.211 | 45.398 |
| H | 33.948 | 57.758 | 45.548 |
| O | 28.114 | 61.851 | 39.376 |
| H | 28.27  | 61.715 | 40.311 |
| H | 27.423 | 62.513 | 39.343 |
| O | 12.394 | 59.131 | 38.766 |
| H | 12.555 | 58.215 | 38.996 |
| H | 13.26  | 59.537 | 38.779 |
| O | 19.636 | 49.75  | 31.96  |
| H | 18.855 | 49.786 | 31.408 |
| H | 20.29  | 49.305 | 31.421 |
| O | 11.885 | 64.244 | 44.526 |
| H | 11.546 | 64.785 | 43.812 |
| H | 12.294 | 64.868 | 45.125 |
| O | 27.329 | 61.329 | 50.868 |
| H | 27.375 | 61.08  | 51.791 |
| H | 26.407 | 61.222 | 50.637 |
| O | 16.473 | 57.362 | 45.197 |
| H | 16.557 | 57.106 | 46.115 |
| H | 16.31  | 56.541 | 44.732 |
| O | 16.069 | 62.729 | 34.464 |
| H | 16.132 | 62.827 | 33.514 |
| H | 15.135 | 62.601 | 34.631 |
| O | 12.429 | 50.85  | 46.504 |

|   |        |        |        |
|---|--------|--------|--------|
| H | 11.78  | 50.783 | 47.204 |
| H | 13.23  | 50.49  | 46.884 |
| O | 17.265 | 59.941 | 30.012 |
| H | 17.695 | 60.795 | 29.982 |
| H | 17.889 | 59.344 | 29.598 |
| O | 27.74  | 53.172 | 55.022 |
| H | 28.046 | 52.475 | 54.442 |
| H | 27.732 | 52.774 | 55.892 |
| O | 30.458 | 63.327 | 43.957 |
| H | 30.404 | 62.382 | 43.813 |
| H | 31.322 | 63.571 | 43.625 |
| O | 12.941 | 48.999 | 40.393 |
| H | 12.231 | 49.403 | 40.892 |
| H | 13.427 | 49.738 | 40.027 |
| O | 15.322 | 51.302 | 47.787 |
| H | 15.57  | 51.103 | 46.884 |
| H | 16.121 | 51.648 | 48.184 |
| O | 12.513 | 57.404 | 48.436 |
| H | 12.555 | 56.485 | 48.698 |
| H | 12.023 | 57.397 | 47.613 |
| O | 22.525 | 53.684 | 47.268 |
| H | 23.3   | 53.444 | 46.76  |
| H | 22.536 | 54.641 | 47.282 |
| O | 22.512 | 59.546 | 44.177 |
| H | 22.701 | 59.32  | 43.266 |
| H | 21.814 | 58.944 | 44.433 |
| O | 10.991 | 55.26  | 33.936 |
| H | 11.664 | 55.863 | 33.621 |
| H | 10.655 | 54.841 | 33.144 |
| O | 20.26  | 52.623 | 45.897 |
| H | 20.636 | 52.74  | 46.769 |
| H | 20.597 | 53.362 | 45.39  |
| O | 25.525 | 55.955 | 39.879 |
| H | 26.466 | 55.882 | 40.036 |
| H | 25.348 | 55.322 | 39.183 |
| O | 31.504 | 50.87  | 31.483 |
| H | 30.642 | 51.095 | 31.834 |
| H | 32.12  | 51.353 | 32.033 |
| O | 12.933 | 42.597 | 23.932 |
| H | 12.06  | 42.989 | 23.92  |
| H | 13.526 | 43.329 | 23.765 |
| O | 22.839 | 48.651 | 30.404 |
| H | 22.37  | 47.961 | 30.874 |
| H | 23.194 | 48.214 | 29.63  |
| O | 29.28  | 54.563 | 30.954 |
| H | 29.389 | 54.014 | 30.177 |
| H | 30.058 | 54.385 | 31.484 |

|   |        |        |        |
|---|--------|--------|--------|
| O | 15.03  | 54.833 | 44.674 |
| H | 14.386 | 55.091 | 44.015 |
| H | 14.507 | 54.491 | 45.399 |
| O | 34.777 | 60.447 | 33.8   |
| H | 34     | 60.988 | 33.937 |
| H | 34.433 | 59.599 | 33.521 |
| O | 35.772 | 55.77  | 36.428 |
| H | 36.342 | 56.49  | 36.698 |
| H | 35.13  | 56.176 | 35.846 |
| O | 33.201 | 51.642 | 33.586 |
| H | 33.998 | 51.13  | 33.722 |
| H | 32.85  | 51.777 | 34.466 |
| O | 10.987 | 53.567 | 37.681 |
| H | 10.259 | 53.504 | 37.063 |
| H | 11.77  | 53.47  | 37.138 |
| O | 26.18  | 56.675 | 48.245 |
| H | 26.583 | 57.173 | 47.534 |
| H | 25.947 | 57.336 | 48.898 |
| O | 12.225 | 56.066 | 45.933 |
| H | 12.817 | 55.38  | 46.24  |
| H | 11.686 | 55.637 | 45.268 |
| O | 32.064 | 48.744 | 41.387 |
| H | 31.657 | 49.178 | 40.637 |
| H | 31.526 | 47.967 | 41.535 |
| O | 16.574 | 54.053 | 27.557 |
| H | 15.742 | 53.689 | 27.859 |
| H | 16.937 | 54.493 | 28.325 |
| O | 24.433 | 55.611 | 35.273 |
| H | 25.308 | 55.559 | 34.889 |
| H | 24.409 | 56.467 | 35.7   |
| O | 43.117 | 61.354 | 44.114 |
| H | 42.794 | 61.898 | 43.396 |
| H | 42.791 | 61.783 | 44.905 |
| O | 25.058 | 48.641 | 27.363 |
| H | 24.722 | 47.909 | 27.881 |
| H | 25.061 | 49.382 | 27.969 |
| O | 6.291  | 46.594 | 34.308 |
| H | 6.544  | 45.692 | 34.502 |
| H | 6.443  | 47.067 | 35.127 |
| O | 30.089 | 52.293 | 37.637 |
| H | 30.412 | 52.038 | 36.773 |
| H | 30.71  | 52.956 | 37.939 |
| O | 13.361 | 53.773 | 46.485 |
| H | 12.923 | 52.927 | 46.389 |
| H | 13.08  | 54.092 | 47.343 |
| O | 25.044 | 52.803 | 43.626 |
| H | 25.232 | 52.683 | 42.695 |

|   |        |        |        |
|---|--------|--------|--------|
| H | 24.725 | 51.949 | 43.918 |
| O | 32.669 | 56.139 | 42.937 |
| H | 32.824 | 55.215 | 43.131 |
| H | 33.334 | 56.605 | 43.445 |
| O | 26.584 | 48.658 | 30.417 |
| H | 26.946 | 48.936 | 29.575 |
| H | 26.516 | 47.706 | 30.346 |
| O | 27.802 | 51.818 | 39.314 |
| H | 28.459 | 52.11  | 38.682 |
| H | 27.996 | 50.891 | 39.451 |
| O | 14.891 | 40.656 | 44.618 |
| H | 14.201 | 41.131 | 45.081 |
| H | 15.591 | 40.56  | 45.263 |
| O | 23.692 | 50.208 | 49.098 |
| H | 23.925 | 51.135 | 49.046 |
| H | 23.45  | 49.972 | 48.203 |
| O | 19.706 | 53.14  | 42.407 |
| H | 19.404 | 52.236 | 42.496 |
| H | 19.108 | 53.647 | 42.955 |
| O | 6.224  | 47.862 | 47.89  |
| H | 6.902  | 48.063 | 48.534 |
| H | 5.866  | 47.021 | 48.173 |
| O | 24.203 | 49.861 | 43.901 |
| H | 24.232 | 49.477 | 44.778 |
| H | 23.356 | 50.305 | 43.862 |
| O | 22.63  | 47.559 | 40.363 |
| H | 22.823 | 47.171 | 41.216 |
| H | 23.365 | 47.296 | 39.809 |
| O | 19.341 | 49.232 | 41.267 |
| H | 18.569 | 48.707 | 41.055 |
| H | 20.076 | 48.628 | 41.17  |
| O | 27.034 | 55.381 | 42.76  |
| H | 27.781 | 54.851 | 42.481 |
| H | 26.492 | 54.78  | 43.271 |
| O | 34.488 | 47.704 | 35.151 |
| H | 33.889 | 47.365 | 35.816 |
| H | 35.044 | 46.957 | 34.928 |
| O | 15.744 | 51.961 | 33.043 |
| H | 16.458 | 52.389 | 32.57  |
| H | 15.966 | 52.078 | 33.967 |
| O | 23.342 | 49.568 | 36.074 |
| H | 23.252 | 49.283 | 35.165 |
| H | 24.004 | 50.259 | 36.045 |
| O | 23.74  | 46.681 | 35.357 |
| H | 24.019 | 46.287 | 34.531 |
| H | 23.294 | 47.488 | 35.099 |
| O | 19.049 | 52.443 | 30.028 |

|   |        |        |        |
|---|--------|--------|--------|
| H | 18.359 | 52.798 | 30.588 |
| H | 19.757 | 52.22  | 30.632 |
| O | 13.717 | 56.853 | 34.521 |
| H | 13.754 | 57.748 | 34.857 |
| H | 14.39  | 56.824 | 33.841 |
| O | 17.247 | 51.567 | 42.955 |
| H | 17.119 | 52.462 | 42.64  |
| H | 17.578 | 51.672 | 43.847 |
| O | 22.228 | 47.143 | 52.036 |
| H | 22.381 | 48.021 | 52.384 |
| H | 22.371 | 46.561 | 52.782 |
| O | 24.228 | 54.337 | 19.039 |
| H | 24.651 | 55.014 | 18.512 |
| H | 23.761 | 54.82  | 19.72  |
| O | 17.976 | 65.515 | 17.375 |
| H | 17.847 | 65.046 | 18.199 |
| H | 18.736 | 65.092 | 16.975 |
| O | 16.12  | 52.438 | 21.007 |
| H | 16.032 | 53.258 | 20.521 |
| H | 17.043 | 52.204 | 20.918 |
| O | 16.07  | 58.53  | 14.507 |
| H | 16.669 | 59.27  | 14.408 |
| H | 16.251 | 57.973 | 13.751 |
| O | 16.299 | 55.124 | 10.519 |
| H | 16.165 | 54.381 | 11.108 |
| H | 16.987 | 54.833 | 9.92   |
| O | 12.534 | 51.238 | 15.45  |
| H | 12.681 | 50.604 | 14.748 |
| H | 11.948 | 50.789 | 16.059 |
| O | 26.007 | 53.978 | 21.428 |
| H | 25.433 | 53.99  | 20.663 |
| H | 26.587 | 54.73  | 21.305 |
| O | 14.67  | 65.135 | 15.741 |
| H | 13.822 | 65.407 | 15.389 |
| H | 15.266 | 65.181 | 14.993 |
| O | 25.775 | 51.239 | 21.908 |
| H | 25.916 | 52.177 | 22.037 |
| H | 26.482 | 50.969 | 21.322 |
| O | 17.045 | 47.714 | 17.588 |
| H | 16.569 | 48.205 | 16.919 |
| H | 17.271 | 48.367 | 18.25  |
| O | 17.69  | 57.365 | 18.748 |
| H | 17.48  | 57.448 | 19.678 |
| H | 16.839 | 57.338 | 18.312 |
| O | 32.718 | 52.625 | 27.062 |
| H | 33.102 | 53.37  | 27.525 |
| H | 33.378 | 51.936 | 27.129 |



|   |        |        |        |
|---|--------|--------|--------|
| O | 11.783 | 53.421 | 22.979 |
| H | 12.214 | 54.22  | 22.676 |
| H | 10.85  | 53.583 | 22.837 |
| O | 29.767 | 58.473 | 14.314 |
| H | 29.238 | 58.675 | 13.542 |
| H | 29.304 | 57.752 | 14.739 |
| O | 15.351 | 47.935 | 22.256 |
| H | 15.892 | 48.499 | 21.702 |
| H | 14.715 | 47.548 | 21.654 |
| O | 27.804 | 50.913 | 19.617 |
| H | 28.35  | 51.699 | 19.62  |
| H | 27.447 | 50.872 | 18.73  |
| O | 13.204 | 59.11  | 11.839 |
| H | 12.862 | 58.314 | 12.246 |
| H | 13.872 | 58.798 | 11.228 |
| O | 27.14  | 56.327 | 20.315 |
| H | 26.879 | 56.389 | 19.396 |
| H | 27.689 | 57.098 | 20.46  |
| O | 29.582 | 65.426 | 16.616 |
| H | 29.954 | 66.277 | 16.847 |
| H | 30.328 | 64.916 | 16.302 |
| O | 12.316 | 47.093 | 17.036 |
| H | 11.67  | 46.398 | 17.163 |
| H | 12.973 | 46.706 | 16.456 |
| O | 32.664 | 55.889 | 22.659 |
| H | 32.395 | 55.087 | 23.107 |
| H | 31.848 | 56.26  | 22.322 |
| O | 28.39  | 64.076 | 13.689 |
| H | 28.646 | 64.499 | 14.509 |
| H | 29.219 | 63.879 | 13.253 |
| O | 29.011 | 53.862 | 25.315 |
| H | 28.278 | 53.285 | 25.1   |
| H | 28.6   | 54.687 | 25.572 |
| O | 17.181 | 56.266 | 16.014 |
| H | 17.146 | 56.92  | 15.317 |
| H | 16.513 | 56.546 | 16.639 |
| O | 18.662 | 56.597 | 23.484 |
| H | 18.672 | 55.952 | 24.191 |
| H | 19.563 | 56.61  | 23.16  |
| O | 16.469 | 53.666 | 15.148 |
| H | 16.708 | 53.452 | 16.05  |
| H | 16.701 | 54.589 | 15.051 |
| O | 17.64  | 58.954 | 24.376 |
| H | 17.92  | 58.149 | 23.941 |
| H | 16.801 | 59.168 | 23.968 |
| O | 24.04  | 48.149 | 12.332 |
| H | 23.116 | 47.908 | 12.267 |

|   |        |        |        |
|---|--------|--------|--------|
| H | 24.235 | 48.576 | 11.498 |
| O | 15.974 | 59.74  | 17.191 |
| H | 15.554 | 60.537 | 16.869 |
| H | 15.621 | 59.043 | 16.638 |
| O | 17.004 | 48.01  | 24.447 |
| H | 16.535 | 48.803 | 24.708 |
| H | 16.533 | 47.697 | 23.674 |
| O | 24.144 | 52.133 | 17.247 |
| H | 23.907 | 52.672 | 18.002 |
| H | 24.281 | 51.259 | 17.611 |
| O | 13.207 | 51.196 | 27.351 |
| H | 12.878 | 51.772 | 26.661 |
| H | 13.411 | 51.784 | 28.078 |
| O | 15.232 | 55.977 | 25.295 |
| H | 15.338 | 55.141 | 25.749 |
| H | 15.161 | 56.623 | 25.997 |
| O | 19.059 | 51.414 | 23.573 |
| H | 18.463 | 51.731 | 24.251 |
| H | 19.349 | 52.205 | 23.119 |
| O | 34.029 | 57.556 | 33.386 |
| H | 33.534 | 57.706 | 32.58  |
| H | 34.299 | 56.639 | 33.333 |
| O | 8.91   | 42.142 | 12.139 |
| H | 8.025  | 42.491 | 12.036 |
| H | 9.392  | 42.84  | 12.583 |
| O | 21.974 | 59.311 | 22.85  |
| H | 21.381 | 58.566 | 22.754 |
| H | 21.511 | 60.041 | 22.44  |
| O | 11.984 | 56.967 | 18.492 |
| H | 11.204 | 56.523 | 18.16  |
| H | 11.985 | 57.814 | 18.046 |
| O | 19.608 | 50.679 | 15.455 |
| H | 20.368 | 50.716 | 14.874 |
| H | 19.065 | 49.978 | 15.096 |
| O | 23.993 | 51.347 | 29.894 |
| H | 23.262 | 51.84  | 30.267 |
| H | 23.727 | 50.43  | 29.971 |
| O | 28.171 | 51.172 | 16.889 |
| H | 27.692 | 50.381 | 16.644 |
| H | 27.866 | 51.837 | 16.272 |
| O | 18.663 | 55.195 | 26.012 |
| H | 18.016 | 55.888 | 26.141 |
| H | 18.219 | 54.397 | 26.3   |
| O | 24.342 | 55.987 | 30.722 |
| H | 25.2   | 55.735 | 31.065 |
| H | 23.724 | 55.422 | 31.185 |
| O | 9.188  | 55.729 | 12.751 |

|   |        |        |        |
|---|--------|--------|--------|
| H | 9.201  | 54.842 | 13.109 |
| H | 9.523  | 56.279 | 13.459 |
| O | 12.434 | 56.748 | 12.98  |
| H | 11.985 | 56.437 | 12.194 |
| H | 12.341 | 56.032 | 13.608 |
| O | 24.162 | 54.167 | 23.488 |
| H | 24.935 | 54.279 | 22.935 |
| H | 24.474 | 53.659 | 24.236 |
| O | 19.983 | 56.391 | 17.244 |
| H | 20.22  | 55.649 | 17.799 |
| H | 19.18  | 56.736 | 17.635 |
| O | 6.984  | 51.04  | 15.738 |
| H | 7.707  | 50.488 | 16.035 |
| H | 6.314  | 50.422 | 15.446 |
| O | 22.733 | 49.018 | 22.429 |
| H | 22.897 | 49.014 | 23.372 |
| H | 22.083 | 48.329 | 22.296 |
| O | 21.627 | 50.928 | 25.304 |
| H | 21.191 | 51.58  | 24.755 |
| H | 21.255 | 51.061 | 26.176 |
| O | 17.096 | 56.818 | 21.291 |
| H | 17.906 | 56.788 | 21.801 |
| H | 16.403 | 56.903 | 21.946 |
| O | 28.491 | 47.959 | 26.335 |
| H | 28.314 | 47.749 | 25.418 |
| H | 27.858 | 47.435 | 26.827 |
| O | 23.753 | 61.896 | 15.765 |
| H | 22.924 | 61.502 | 16.036 |
| H | 23.645 | 62.062 | 14.829 |
| O | 21.947 | 51.959 | 19.578 |
| H | 21.975 | 52.577 | 20.308 |
| H | 22.593 | 51.29  | 19.804 |
| O | 11.517 | 52.364 | 25.382 |
| H | 10.69  | 52.824 | 25.525 |
| H | 11.88  | 52.765 | 24.592 |
| O | 19.828 | 51.41  | 27.686 |
| H | 19.585 | 50.493 | 27.814 |
| H | 19.518 | 51.853 | 28.476 |
| O | 20.647 | 54.482 | 18.964 |
| H | 21.317 | 53.799 | 19.007 |
| H | 20.06  | 54.288 | 19.694 |
| O | 19.002 | 64.26  | 27.44  |
| H | 18.694 | 65.164 | 27.514 |
| H | 19.329 | 64.191 | 26.543 |
| O | 22.918 | 53.087 | 15.056 |
| H | 22.031 | 52.732 | 15.125 |
| H | 23.404 | 52.656 | 15.759 |

|   |        |        |        |
|---|--------|--------|--------|
| O | 19.119 | 59.654 | 19.364 |
| H | 18.702 | 58.805 | 19.217 |
| H | 19.887 | 59.646 | 18.794 |
| O | 13.591 | 53.196 | 28.94  |
| H | 12.658 | 53.302 | 28.755 |
| H | 13.653 | 53.242 | 29.894 |
| O | 14.648 | 60.371 | 29.929 |
| H | 15.563 | 60.093 | 29.973 |
| H | 14.33  | 60.293 | 30.828 |
| O | 25.926 | 56.611 | 14.71  |
| H | 25.372 | 57.027 | 14.05  |
| H | 26.415 | 55.944 | 14.227 |
| O | 23.252 | 58.823 | 20.053 |
| H | 23.058 | 59.529 | 20.669 |
| H | 22.528 | 58.847 | 19.426 |
| O | 17.254 | 53.136 | 17.585 |
| H | 18.172 | 52.881 | 17.678 |
| H | 17.181 | 53.953 | 18.077 |
| O | 22.755 | 58.784 | 15.461 |
| H | 22.245 | 59.428 | 14.97  |
| H | 22.441 | 57.937 | 15.142 |
| O | 15.698 | 36.475 | 20.332 |
| H | 16.268 | 35.899 | 20.842 |
| H | 15.043 | 36.78  | 20.959 |
| O | 10.431 | 43.691 | 24.2   |
| H | 10.582 | 44.632 | 24.114 |
| H | 9.546  | 43.557 | 23.861 |
| O | 5.55   | 63.377 | 22.636 |
| H | 5.917  | 63.824 | 21.873 |
| H | 4.683  | 63.768 | 22.748 |
| O | 22.017 | 53.22  | 30.552 |
| H | 21.475 | 53.868 | 30.102 |
| H | 21.859 | 53.38  | 31.482 |
| O | 26.572 | 48.927 | 16.437 |
| H | 25.893 | 48.713 | 17.076 |
| H | 26.592 | 48.174 | 15.846 |
| O | 22.061 | 52.312 | 22.593 |
| H | 22.321 | 51.395 | 22.684 |
| H | 22.887 | 52.796 | 22.597 |
| O | 20.041 | 53.99  | 21.855 |
| H | 20.793 | 53.459 | 22.116 |
| H | 20.334 | 54.894 | 21.97  |
| O | 19.572 | 48.585 | 24.477 |
| H | 19.531 | 49.502 | 24.204 |
| H | 18.656 | 48.313 | 24.538 |
| O | 15.522 | 49.165 | 15.818 |
| H | 15.843 | 49.053 | 14.923 |

|   |        |        |        |
|---|--------|--------|--------|
| H | 14.657 | 49.561 | 15.714 |
| O | 21.246 | 51.079 | 33.604 |
| H | 21.931 | 50.43  | 33.444 |
| H | 20.723 | 51.078 | 32.803 |
| O | 21.088 | 56.584 | 22.458 |
| H | 21.264 | 56.162 | 23.299 |
| H | 21.813 | 56.31  | 21.896 |
| O | 22.258 | 67.369 | 21.003 |
| H | 22.564 | 68.113 | 21.521 |
| H | 22.836 | 67.354 | 20.241 |
| O | 18.971 | 57.605 | 13.34  |
| H | 19.713 | 57.828 | 12.777 |
| H | 19.036 | 58.218 | 14.073 |
| O | 9.075  | 61.338 | 24.479 |
| H | 9.941  | 61.165 | 24.848 |
| H | 9.06   | 60.843 | 23.66  |
| O | 23.713 | 64.567 | 30.194 |
| H | 23.013 | 65.167 | 30.451 |
| H | 23.278 | 63.72  | 30.097 |
| O | 11.504 | 57.584 | 26.837 |
| H | 10.709 | 57.216 | 27.223 |
| H | 11.481 | 57.299 | 25.923 |
| O | 21.517 | 47.813 | 19.679 |
| H | 21.556 | 48.321 | 18.868 |
| H | 21.158 | 48.421 | 20.325 |
| O | 15.44  | 49.438 | 27.239 |
| H | 15.737 | 49.975 | 26.504 |
| H | 14.55  | 49.743 | 27.414 |
| O | 21.966 | 56.05  | 15.04  |
| H | 21.263 | 56.017 | 15.689 |
| H | 22.383 | 55.19  | 15.093 |
| O | 27.483 | 58.702 | 35.299 |
| H | 27.26  | 59.471 | 35.824 |
| H | 27.82  | 58.069 | 35.933 |
| O | 28.66  | 67.559 | 27.258 |
| H | 29.066 | 68.296 | 27.715 |
| H | 29.171 | 67.465 | 26.454 |
| O | 16.484 | 54.819 | 19.696 |
| H | 15.857 | 55.166 | 19.062 |
| H | 16.729 | 55.575 | 20.23  |
| O | 17.108 | 49.622 | 31.077 |
| H | 17.361 | 49.435 | 30.172 |
| H | 16.246 | 50.031 | 31.005 |
| O | 21.162 | 55.611 | 24.826 |
| H | 20.344 | 55.816 | 25.279 |
| H | 21.821 | 55.587 | 25.519 |
| O | 23.518 | 61.326 | 30.571 |

|   |        |        |        |
|---|--------|--------|--------|
| H | 23.847 | 60.434 | 30.465 |
| H | 23.15  | 61.342 | 31.454 |
| O | 21.669 | 60.608 | 32.556 |
| H | 20.942 | 61.23  | 32.555 |
| H | 21.258 | 59.759 | 32.721 |
| O | 6.191  | 56.942 | 14.001 |
| H | 6.922  | 56.947 | 13.383 |
| H | 6.292  | 57.754 | 14.498 |
| O | 23.471 | 55.94  | 21.161 |
| H | 23.98  | 55.663 | 21.923 |
| H | 23.842 | 56.788 | 20.92  |
| O | 22.832 | 48.557 | 25.273 |
| H | 22.351 | 49.37  | 25.431 |
| H | 23.547 | 48.574 | 25.909 |
| O | 24.199 | 46.382 | 20.16  |
| H | 23.385 | 46.679 | 20.567 |
| H | 24.88  | 46.611 | 20.792 |
| O | 13.552 | 47.741 | 12.678 |
| H | 14.505 | 47.659 | 12.643 |
| H | 13.232 | 47.08  | 12.064 |
| O | 14.184 | 51.785 | 23.314 |
| H | 13.55  | 52.48  | 23.138 |
| H | 14.827 | 51.863 | 22.608 |
| O | 37.848 | 59.398 | 16.948 |
| H | 37.254 | 59.969 | 17.435 |
| H | 37.908 | 58.604 | 17.48  |
| O | 7.842  | 56.133 | 24.46  |
| H | 7.837  | 56.901 | 23.889 |
| H | 7.223  | 55.527 | 24.052 |
| O | 27.003 | 54.458 | 13.362 |
| H | 26.125 | 54.383 | 12.986 |
| H | 27.236 | 53.563 | 13.607 |
| O | 30.154 | 54.433 | 13.918 |
| H | 30.719 | 55.188 | 13.753 |
| H | 29.425 | 54.785 | 14.428 |
| O | 25.785 | 60.246 | 14.15  |
| H | 25.309 | 59.482 | 13.823 |
| H | 25.28  | 60.536 | 14.91  |
| O | 9.405  | 51.849 | 20.818 |
| H | 9.28   | 52.372 | 21.61  |
| H | 10.123 | 51.254 | 21.035 |
| O | 32.73  | 57.463 | 29.229 |
| H | 32.662 | 57.62  | 30.171 |
| H | 32.546 | 58.314 | 28.832 |
| O | 12.601 | 55.985 | 31.669 |
| H | 12.889 | 55.072 | 31.676 |
| H | 13.412 | 56.492 | 31.644 |

|   |        |        |        |
|---|--------|--------|--------|
| O | 25.25  | 55.828 | 27.918 |
| H | 25.508 | 55.072 | 28.444 |
| H | 25.55  | 56.585 | 28.421 |
| O | 9.267  | 54.697 | 15.87  |
| H | 8.929  | 54.241 | 16.641 |
| H | 8.488  | 55.034 | 15.429 |
| O | 32.789 | 54.979 | 18.159 |
| H | 33.634 | 54.598 | 18.397 |
| H | 32.62  | 54.655 | 17.275 |
| O | 29.752 | 59.346 | 33.7   |
| H | 29.279 | 58.896 | 34.399 |
| H | 29.357 | 60.217 | 33.665 |
| O | 6.748  | 48.945 | 18.908 |
| H | 6.159  | 49.34  | 18.265 |
| H | 6.172  | 48.448 | 19.488 |
| O | 14.979 | 45.496 | 8.351  |
| H | 14.395 | 45.681 | 9.087  |
| H | 14.449 | 45.675 | 7.574  |
| O | 31.614 | 53.911 | 24.272 |
| H | 30.711 | 53.949 | 24.588 |
| H | 32.125 | 53.654 | 25.039 |
| O | 17.032 | 49.373 | 20.702 |
| H | 17.884 | 49.807 | 20.653 |
| H | 16.435 | 49.967 | 20.248 |
| O | 29.113 | 48.122 | 17.534 |
| H | 29.324 | 47.885 | 18.437 |
| H | 28.187 | 48.364 | 17.559 |
| O | 29.332 | 43.866 | 8.531  |
| H | 28.858 | 43.049 | 8.686  |
| H | 30.081 | 43.61  | 7.993  |
| O | 33.915 | 46.122 | 11.348 |
| H | 33.335 | 46.194 | 10.589 |
| H | 33.425 | 46.529 | 12.063 |
| O | 11.006 | 53.587 | 28.282 |
| H | 10.581 | 53.873 | 27.473 |
| H | 10.914 | 54.331 | 28.877 |
| O | 18.705 | 51.995 | 20.276 |
| H | 18.947 | 52.624 | 20.956 |
| H | 19.22  | 51.214 | 20.477 |
| O | 15.901 | 45.641 | 26.401 |
| H | 15.911 | 45.798 | 27.345 |
| H | 16.357 | 46.395 | 26.027 |
| O | 17.731 | 52.275 | 25.962 |
| H | 18.491 | 51.941 | 26.437 |
| H | 17.275 | 52.828 | 26.596 |
| O | 26.024 | 42.896 | 28.784 |
| H | 26.775 | 42.59  | 29.293 |

|   |        |        |        |
|---|--------|--------|--------|
| H | 25.574 | 43.508 | 29.367 |
| O | 25.188 | 52.704 | 33.003 |
| H | 24.446 | 53.233 | 33.296 |
| H | 25.459 | 53.109 | 32.179 |
| O | 26.866 | 46.339 | 27.594 |
| H | 26.406 | 45.684 | 27.069 |
| H | 26.791 | 46.021 | 28.493 |
| O | 26.234 | 49.094 | 24.821 |
| H | 26.795 | 48.434 | 24.414 |
| H | 25.922 | 48.681 | 25.626 |
| O | 27.3   | 45.051 | 15.556 |
| H | 26.48  | 44.707 | 15.201 |
| H | 27.566 | 45.726 | 14.932 |
| O | 14.448 | 37.581 | 17.349 |
| H | 14.203 | 38.497 | 17.218 |
| H | 13.754 | 37.224 | 17.902 |
| O | 21.512 | 47.566 | 16.138 |
| H | 20.794 | 46.994 | 16.41  |
| H | 21.401 | 48.356 | 16.666 |
| O | 21.17  | 44.066 | 26.228 |
| H | 20.855 | 44.944 | 26.014 |
| H | 21.315 | 44.088 | 27.174 |
| O | 28.215 | 44.193 | 18.033 |
| H | 27.913 | 44.607 | 17.225 |
| H | 28.236 | 43.258 | 17.829 |
| O | 18.453 | 47.775 | 14.957 |
| H | 19.003 | 47.288 | 15.571 |
| H | 18.378 | 47.2   | 14.195 |
| O | 9.686  | 51.787 | 15.362 |
| H | 8.736  | 51.685 | 15.411 |
| H | 9.964  | 51.889 | 16.272 |
| O | 17.911 | 53.283 | 34.36  |
| H | 18.495 | 52.785 | 34.933 |
| H | 17.201 | 53.571 | 34.933 |
| O | 24.392 | 44.467 | 30.447 |
| H | 24.276 | 44.715 | 31.364 |
| H | 23.538 | 44.627 | 30.046 |
| O | 26.147 | 48.525 | 6.448  |
| H | 26.33  | 48.882 | 5.579  |
| H | 25.221 | 48.719 | 6.597  |
| O | 21.951 | 59.436 | 5.098  |
| H | 21.704 | 60.027 | 4.387  |
| H | 22.558 | 59.946 | 5.634  |
| O | 17.466 | 55.635 | 2.826  |
| H | 16.981 | 54.877 | 2.5    |
| H | 17.618 | 55.441 | 3.751  |
| O | 12.807 | 53.273 | 6.851  |



|   |        |        |        |
|---|--------|--------|--------|
| H | 11.989 | 53.672 | 6.554  |
| H | 12.759 | 53.314 | 7.807  |
| O | 10.422 | 54.854 | 6.91   |
| H | 9.494  | 55.079 | 6.849  |
| H | 10.79  | 55.509 | 7.502  |
| O | 22.506 | 45.397 | 6.169  |
| H | 22.09  | 44.535 | 6.202  |
| H | 23.438 | 45.208 | 6.056  |
| O | 13.393 | 59.057 | -6.367 |
| H | 12.529 | 58.647 | -6.321 |
| H | 13.213 | 59.997 | -6.351 |
| O | 17.091 | 50.485 | 11.398 |
| H | 16.682 | 49.64  | 11.586 |
| H | 18.031 | 50.311 | 11.444 |
| O | 31.699 | 53.242 | 7.106  |
| H | 30.772 | 53.032 | 6.992  |
| H | 31.707 | 53.945 | 7.755  |
| O | 18.676 | 59.014 | 7.721  |
| H | 18.168 | 59.012 | 6.91   |
| H | 18.966 | 58.108 | 7.825  |
| O | 27.964 | 52.692 | -1.658 |
| H | 27.773 | 53.389 | -1.031 |
| H | 28.726 | 52.243 | -1.293 |
| O | 15.175 | 48.783 | 8.899  |
| H | 14.441 | 48.171 | 8.946  |
| H | 14.909 | 49.52  | 9.45   |
| O | 26.016 | 49.58  | 3.965  |
| H | 26.184 | 48.96  | 3.255  |
| H | 26.15  | 50.441 | 3.568  |
| O | 16.81  | 44.279 | 4.811  |
| H | 16.849 | 45.166 | 4.454  |
| H | 17.113 | 43.719 | 4.097  |
| O | 25.734 | 63.524 | 8.188  |
| H | 24.895 | 63.542 | 8.648  |
| H | 25.578 | 64.026 | 7.387  |
| O | 33.395 | 58.397 | 2.917  |
| H | 33.179 | 57.52  | 3.231  |
| H | 34.131 | 58.673 | 3.465  |
| O | 26.363 | 54.321 | 10.226 |
| H | 25.982 | 53.473 | 9.999  |
| H | 27.308 | 54.177 | 10.187 |
| O | 17.528 | 50.004 | 8.485  |
| H | 16.723 | 49.489 | 8.426  |
| H | 17.637 | 50.173 | 9.421  |
| O | 13.321 | 48.794 | 5.8    |
| H | 12.367 | 48.882 | 5.802  |
| H | 13.49  | 48     | 6.306  |

|   |        |        |        |
|---|--------|--------|--------|
| O | 21.074 | 54.312 | 11.946 |
| H | 20.907 | 55.254 | 11.956 |
| H | 20.764 | 54.004 | 12.798 |
| O | 13.397 | 47.802 | 2.181  |
| H | 13.803 | 47.127 | 2.725  |
| H | 12.737 | 48.201 | 2.749  |
| O | 28.759 | 56.252 | 15.601 |
| H | 27.822 | 56.057 | 15.605 |
| H | 29.01  | 56.244 | 16.524 |
| O | 19.666 | 50.788 | 2.971  |
| H | 18.886 | 50.8   | 3.526  |
| H | 20.393 | 50.934 | 3.575  |
| O | 20.385 | 52.694 | 5.391  |
| H | 20.959 | 52.262 | 6.024  |
| H | 20.895 | 53.441 | 5.077  |
| O | 23.729 | 56.599 | 8.921  |
| H | 24.24  | 56.376 | 9.699  |
| H | 23.697 | 55.787 | 8.415  |
| O | 21.686 | 50.672 | 13.583 |
| H | 21.784 | 49.721 | 13.524 |
| H | 22.55  | 50.986 | 13.85  |
| O | 11.851 | 53.916 | 10.92  |
| H | 11.552 | 53.328 | 11.613 |
| H | 11.782 | 53.397 | 10.119 |
| O | 17.622 | 61.614 | 11.101 |
| H | 18.2   | 61.037 | 10.602 |
| H | 17.969 | 62.492 | 10.946 |
| O | 21.52  | 47.61  | 13.154 |
| H | 21.335 | 47.693 | 14.089 |
| H | 21.087 | 46.796 | 12.896 |
| O | 26.052 | 52.342 | 15.081 |
| H | 25.569 | 52.839 | 15.741 |
| H | 25.468 | 51.618 | 14.853 |
| O | 3.652  | 46.577 | -6.302 |
| H | 3.835  | 47.025 | -5.477 |
| H | 4.076  | 45.723 | -6.21  |
| O | 20.712 | 58.326 | 2.247  |
| H | 20.479 | 57.866 | 3.053  |
| H | 20.298 | 59.185 | 2.333  |
| O | 25.487 | 51.625 | 9.571  |
| H | 25.858 | 51.342 | 10.407 |
| H | 24.817 | 50.971 | 9.373  |
| O | 11.382 | 57.922 | 1.745  |
| H | 12.056 | 58.59  | 1.868  |
| H | 10.772 | 58.06  | 2.471  |
| O | 22.744 | 53.024 | 2.12   |
| H | 22.424 | 53.62  | 2.797  |

|   |        |        |        |
|---|--------|--------|--------|
| H | 21.959 | 52.765 | 1.638  |
| O | 27.138 | 44.212 | 11.744 |
| H | 27.016 | 43.467 | 12.332 |
| H | 26.276 | 44.352 | 11.352 |
| O | 20.194 | 56.072 | 7.611  |
| H | 20.89  | 56.079 | 6.953  |
| H | 20.613 | 56.402 | 8.406  |
| O | 17.282 | 62.089 | 8.027  |
| H | 17.622 | 61.302 | 8.454  |
| H | 16.785 | 61.759 | 7.278  |
| O | 32.29  | 60.536 | 4.812  |
| H | 32.601 | 61.323 | 5.259  |
| H | 32.607 | 60.63  | 3.913  |
| O | 22.04  | 52.499 | 9.96   |
| H | 21.316 | 53.125 | 9.987  |
| H | 22.438 | 52.556 | 10.828 |
| O | 17.534 | 62.892 | 3.032  |
| H | 18.122 | 63.388 | 3.602  |
| H | 17.397 | 63.462 | 2.275  |
| O | 16.202 | 58.564 | 9.849  |
| H | 17.121 | 58.628 | 9.591  |
| H | 16.227 | 58.225 | 10.744 |
| O | 16.504 | 57.295 | 12.083 |
| H | 17.453 | 57.217 | 12.18  |
| H | 16.236 | 56.474 | 11.671 |
| O | 21.899 | 57.118 | 12.715 |
| H | 22.731 | 57.589 | 12.706 |
| H | 21.858 | 56.72  | 13.585 |
| O | 7.36   | 49.199 | 11.07  |
| H | 6.756  | 49.059 | 11.8   |
| H | 7.125  | 48.526 | 10.432 |
| O | 28.064 | 59.572 | 1.455  |
| H | 28.461 | 60.389 | 1.154  |
| H | 28.791 | 58.95  | 1.489  |
| O | 11.758 | 51.562 | 9.529  |
| H | 12.585 | 51.08  | 9.539  |
| H | 11.274 | 51.223 | 10.283 |
| O | 26.612 | 54.825 | 1.461  |
| H | 25.987 | 55.496 | 1.735  |
| H | 26.067 | 54.083 | 1.199  |
| O | 21.495 | 57.393 | 9.89   |
| H | 21.486 | 57.348 | 10.846 |
| H | 22.383 | 57.129 | 9.647  |
| O | 11.256 | 52.568 | 13.056 |
| H | 10.545 | 52.588 | 13.697 |
| H | 11.667 | 51.713 | 13.183 |
| O | 18.402 | 64.206 | 13.272 |

|   |        |        |        |
|---|--------|--------|--------|
| H | 17.445 | 64.18  | 13.244 |
| H | 18.662 | 64.392 | 12.37  |
| O | 18.243 | 54.425 | 8.624  |
| H | 18.804 | 55.088 | 8.222  |
| H | 18.344 | 53.655 | 8.064  |
| O | 18.434 | 46.164 | 12.511 |
| H | 17.927 | 45.403 | 12.229 |
| H | 19.343 | 45.929 | 12.325 |
| O | 19.865 | 60.212 | 9.854  |
| H | 19.756 | 59.912 | 8.952  |
| H | 20.74  | 60.599 | 9.874  |
| O | 24.405 | 58.528 | 12.528 |
| H | 24.367 | 59.299 | 11.963 |
| H | 24.799 | 57.848 | 11.981 |
| O | 15.994 | 38.231 | 8.109  |
| H | 15.48  | 38.307 | 8.912  |
| H | 15.367 | 37.93  | 7.451  |
| O | 14.617 | 51.383 | 9.822  |
| H | 14.245 | 52.088 | 10.352 |
| H | 15.514 | 51.29  | 10.144 |
| O | 18.007 | 52.321 | 6.588  |
| H | 18.077 | 51.657 | 7.274  |
| H | 18.82  | 52.238 | 6.089  |
| O | 22.163 | 51.688 | 7.09   |
| H | 23.044 | 51.994 | 6.874  |
| H | 22.074 | 51.859 | 8.028  |
| O | 23.221 | 56.974 | 4.803  |
| H | 24.04  | 57.313 | 4.441  |
| H | 22.633 | 57.729 | 4.813  |
| O | 19.83  | 53.05  | 14.363 |
| H | 19.042 | 53.571 | 14.517 |
| H | 19.635 | 52.199 | 14.756 |
| O | 20.72  | 45.749 | 1.241  |
| H | 21.16  | 45.908 | 0.406  |
| H | 20.454 | 46.618 | 1.542  |
| O | 29.361 | 61.245 | 5.436  |
| H | 29.418 | 62.189 | 5.286  |
| H | 30.272 | 60.95  | 5.451  |
| O | 14.457 | 57.99  | 5.164  |
| H | 13.758 | 58.328 | 5.724  |
| H | 14.315 | 57.043 | 5.149  |
| O | 29.043 | 54.452 | 9.573  |
| H | 29.936 | 54.79  | 9.506  |
| H | 28.922 | 53.935 | 8.778  |
| O | 23.732 | 53.167 | 12.54  |
| H | 22.977 | 53.706 | 12.302 |
| H | 23.604 | 52.974 | 13.468 |

|   |        |        |        |
|---|--------|--------|--------|
| O | 24.558 | 50.188 | 14.06  |
| H | 25.086 | 49.638 | 14.639 |
| H | 24.308 | 49.608 | 13.341 |
| O | 34.843 | 54.012 | -3.584 |
| H | 34.543 | 53.892 | -2.683 |
| H | 35.798 | 53.984 | -3.524 |
| O | 26.703 | 58.475 | -1.165 |
| H | 27.096 | 58.47  | -0.293 |
| H | 27.306 | 58.996 | -1.696 |
| O | 14.133 | 52.255 | -0.578 |
| H | 13.245 | 52.475 | -0.859 |
| H | 14.014 | 51.788 | 0.249  |
| O | 27.346 | 49.68  | -1.285 |
| H | 27.377 | 49.864 | -2.224 |
| H | 28.262 | 49.698 | -1.007 |
| O | 29.015 | 51.855 | 13.61  |
| H | 29.549 | 51.067 | 13.507 |
| H | 29.641 | 52.538 | 13.849 |
| O | 19.442 | 41.876 | 0.452  |
| H | 19.178 | 42.759 | 0.713  |
| H | 19.73  | 41.462 | 1.265  |
| O | 24.653 | 55.316 | 6.475  |
| H | 24.457 | 56.06  | 5.905  |
| H | 25.467 | 55.56  | 6.916  |
| O | 26.662 | 50.977 | 12.203 |
| H | 27.549 | 51.302 | 12.358 |
| H | 26.26  | 50.953 | 13.071 |
| O | 15.334 | 52.383 | 5.939  |
| H | 16.081 | 52.843 | 6.322  |
| H | 14.578 | 52.708 | 6.427  |
| O | 27.257 | 48.4   | 11.676 |
| H | 28.212 | 48.431 | 11.733 |
| H | 26.975 | 49.284 | 11.912 |
| O | 25.447 | 52.267 | 0.716  |
| H | 24.698 | 52.147 | 1.299  |
| H | 26.149 | 51.756 | 1.119  |
| O | 22.27  | 49.625 | 2.948  |
| H | 21.959 | 48.889 | 3.474  |
| H | 23.22  | 49.619 | 3.065  |
| O | 20.456 | 52.301 | 0.59   |
| H | 19.64  | 52.678 | 0.261  |
| H | 20.182 | 51.718 | 1.298  |
| O | 32.007 | 46.868 | 0.958  |
| H | 32.118 | 46.478 | 0.092  |
| H | 32.392 | 47.741 | 0.879  |
| O | 25.413 | 41.022 | -3.267 |
| H | 24.623 | 41.348 | -3.698 |

|   |        |        |        |
|---|--------|--------|--------|
| H | 25.688 | 41.739 | -2.696 |
| O | 18.154 | 43.259 | 11.649 |
| H | 19.077 | 43.278 | 11.394 |
| H | 17.684 | 43.095 | 10.831 |
| O | 30.521 | 48.117 | 11.463 |
| H | 30.62  | 48.546 | 12.313 |
| H | 30.464 | 48.838 | 10.836 |
| O | 22.842 | 42.163 | 54.723 |
| H | 22.033 | 42.608 | 54.975 |
| H | 22.617 | 41.691 | 53.921 |
| O | 24.963 | 35.41  | 51.308 |
| H | 24.315 | 35.279 | 50.616 |
| H | 24.485 | 35.237 | 52.119 |
| O | 8.256  | 39.404 | 60.724 |
| H | 8.28   | 38.449 | 60.789 |
| H | 7.455  | 39.655 | 61.184 |
| O | 31.937 | 45.575 | 57.745 |
| H | 32.313 | 45.313 | 56.904 |
| H | 31.252 | 46.203 | 57.516 |
| O | 16.552 | 46.612 | 59.738 |
| H | 16.735 | 47.444 | 60.176 |
| H | 16.892 | 46.728 | 58.851 |
| O | 13.024 | 35.572 | 55.114 |
| H | 12.18  | 35.371 | 54.71  |
| H | 12.809 | 35.797 | 56.019 |
| O | 11.896 | 42.07  | 56.458 |
| H | 11.377 | 42.792 | 56.103 |
| H | 12.323 | 42.44  | 57.23  |
| O | 31.113 | 49.429 | 55.536 |
| H | 30.971 | 50.369 | 55.649 |
| H | 32.063 | 49.322 | 55.591 |
| O | 19.615 | 40.454 | 54.846 |
| H | 18.905 | 40.338 | 54.215 |
| H | 19.181 | 40.446 | 55.699 |
| O | 20.785 | 38.66  | 51.107 |
| H | 20.246 | 38.502 | 50.332 |
| H | 20.238 | 38.379 | 51.841 |
| O | 10.282 | 31.707 | 54.68  |
| H | 9.49   | 31.613 | 55.208 |
| H | 10.298 | 30.923 | 54.131 |
| O | 32.924 | 34.159 | 46.875 |
| H | 32.92  | 33.481 | 47.55  |
| H | 33.734 | 34.008 | 46.388 |
| O | 5.021  | 34.767 | 59.043 |
| H | 4.739  | 34.072 | 58.449 |
| H | 5.904  | 34.511 | 59.31  |
| O | 15.718 | 37.565 | 56.129 |

|   |        |        |        |
|---|--------|--------|--------|
| H | 16.089 | 38.295 | 55.633 |
| H | 14.774 | 37.721 | 56.115 |
| O | 22.091 | 37.248 | 46.474 |
| H | 23.01  | 37.353 | 46.228 |
| H | 22.096 | 37.264 | 47.431 |
| O | 27.539 | 41.339 | 54.038 |
| H | 26.952 | 41.305 | 54.794 |
| H | 27.828 | 42.251 | 54.001 |
| O | 4.173  | 43.444 | 60.261 |
| H | 4.954  | 43.654 | 59.749 |
| H | 3.448  | 43.543 | 59.645 |
| O | 27.427 | 35.393 | 52.472 |
| H | 26.605 | 35.15  | 52.046 |
| H | 27.195 | 36.127 | 53.04  |
| O | 28.355 | 38.749 | 59.7   |
| H | 28.255 | 38.57  | 60.635 |
| H | 27.911 | 39.587 | 59.568 |
| O | 17.882 | 30.181 | 51.892 |
| H | 17.714 | 29.518 | 52.561 |
| H | 17.167 | 30.075 | 51.264 |
| O | 25.991 | 47.702 | 61.412 |
| H | 26.297 | 46.797 | 61.356 |
| H | 25.384 | 47.795 | 60.678 |
| O | 22.824 | 40.683 | 52.213 |
| H | 22.217 | 41.424 | 52.199 |
| H | 22.275 | 39.921 | 52.029 |
| O | 26.277 | 37.897 | 50.25  |
| H | 26.717 | 37.292 | 49.653 |
| H | 25.663 | 37.349 | 50.737 |
| O | 27.553 | 35.756 | 48.8   |
| H | 26.919 | 35.047 | 48.691 |
| H | 28.196 | 35.41  | 49.419 |
| O | 27.579 | 42.044 | 49.551 |
| H | 27.951 | 41.251 | 49.164 |
| H | 26.715 | 41.775 | 49.862 |
| O | 17.042 | 52.8   | 50.835 |
| H | 17.812 | 53.365 | 50.895 |
| H | 17.323 | 51.972 | 51.225 |
| O | 23.999 | 42.346 | 58.543 |
| H | 24.503 | 43.149 | 58.416 |
| H | 23.165 | 42.515 | 58.103 |
| O | 25.364 | 43.499 | 52.391 |
| H | 24.714 | 44.054 | 51.96  |
| H | 25.302 | 42.66  | 51.934 |
| O | 22.998 | 40.259 | 48.825 |
| H | 23.308 | 40.187 | 47.923 |
| H | 22.403 | 41.009 | 48.815 |

|   |        |        |        |
|---|--------|--------|--------|
| O | 28.363 | 31.488 | 46.847 |
| H | 27.522 | 31.907 | 47.028 |
| H | 28.166 | 30.834 | 46.176 |
| O | 18.509 | 40.662 | 49.802 |
| H | 18.391 | 41.581 | 49.562 |
| H | 19.221 | 40.358 | 49.24  |
| O | 9.881  | 35.602 | 56.054 |
| H | 9.099  | 35.75  | 55.522 |
| H | 10.398 | 34.974 | 55.55  |
| O | 15.243 | 45.255 | 55.802 |
| H | 15.433 | 44.361 | 55.519 |
| H | 15.768 | 45.807 | 55.222 |
| O | 22.601 | 46.322 | 54.774 |
| H | 23.527 | 46.082 | 54.737 |
| H | 22.601 | 47.234 | 55.063 |
| O | 22.505 | 41.591 | 43.973 |
| H | 21.667 | 42.04  | 43.856 |
| H | 22.358 | 40.714 | 43.62  |
| O | 22.534 | 46.569 | 42.921 |
| H | 21.818 | 47.033 | 43.353 |
| H | 22.975 | 46.097 | 43.628 |
| O | 33.236 | 42.743 | 56.255 |
| H | 32.922 | 43.537 | 55.82  |
| H | 33.079 | 42.902 | 57.186 |
| O | 16.249 | 30.727 | 58.204 |
| H | 15.874 | 31.599 | 58.086 |
| H | 15.502 | 30.133 | 58.137 |
| O | 25.068 | 28.938 | 47.178 |
| H | 24.981 | 29.751 | 46.681 |
| H | 24.462 | 29.04  | 47.912 |
| O | 14.707 | 33.366 | 62.852 |
| H | 15.624 | 33.09  | 62.877 |
| H | 14.505 | 33.443 | 61.92  |
| O | 12.61  | 37.133 | 58.065 |
| H | 12.81  | 37.656 | 58.841 |
| H | 12.816 | 37.709 | 57.328 |
| O | 23.832 | 34.522 | 53.703 |
| H | 24.05  | 33.655 | 54.046 |
| H | 23.721 | 35.067 | 54.481 |
| O | 22.541 | 36.238 | 55.879 |
| H | 22.121 | 37.061 | 55.63  |
| H | 22.247 | 36.082 | 56.777 |
| O | 13.855 | 27.723 | 54.402 |
| H | 14.709 | 28.033 | 54.101 |
| H | 14.049 | 27.217 | 55.191 |
| O | 15.741 | 39.806 | 50.523 |
| H | 16.597 | 39.71  | 50.106 |



|   |        |        |        |
|---|--------|--------|--------|
| H | 15.352 | 38.932 | 50.475 |
| O | 24.846 | 35.86  | 67.802 |
| H | 24.247 | 35.114 | 67.835 |
| H | 25.57  | 35.611 | 68.375 |
| O | 13.42  | 38.207 | 60.772 |
| H | 13.968 | 38.938 | 60.486 |
| H | 12.573 | 38.605 | 60.969 |
| O | 15.021 | 32.936 | 57.256 |
| H | 15.237 | 33.833 | 57.511 |
| H | 14.07  | 32.884 | 57.345 |
| O | 16.07  | 35.478 | 48.783 |
| H | 16.876 | 35.054 | 49.077 |
| H | 16.341 | 36.016 | 48.038 |
| O | 23.596 | 31.919 | 54.987 |
| H | 22.65  | 31.865 | 54.853 |
| H | 23.836 | 31.065 | 55.348 |
| O | 20.463 | 38.257 | 44.316 |
| H | 21.066 | 37.631 | 44.717 |
| H | 20.029 | 37.76  | 43.623 |
| O | 11.683 | 29.946 | 57.269 |
| H | 10.905 | 30.18  | 57.775 |
| H | 11.351 | 29.401 | 56.556 |
| O | 6.352  | 37.256 | 57.997 |
| H | 5.958  | 36.499 | 58.43  |
| H | 5.974  | 38.012 | 58.446 |
| O | 26.424 | 43.482 | 56.587 |
| H | 27.282 | 43.871 | 56.414 |
| H | 26.32  | 43.544 | 57.536 |
| O | 21.915 | 31.015 | 45.254 |
| H | 22.782 | 31.083 | 44.854 |
| H | 22.058 | 31.229 | 46.176 |
| O | 21.35  | 33.785 | 46.857 |
| H | 20.537 | 34.291 | 46.861 |
| H | 21.582 | 33.711 | 45.932 |
| O | 19.543 | 44.704 | 46.685 |
| H | 19.905 | 45.588 | 46.743 |
| H | 18.984 | 44.724 | 45.909 |
| O | 17.12  | 38.364 | 43.901 |
| H | 17.957 | 37.979 | 43.64  |
| H | 17.003 | 39.105 | 43.308 |
| O | 22.838 | 31.605 | 48.088 |
| H | 23.634 | 31.777 | 47.585 |
| H | 22.35  | 32.428 | 48.054 |
| O | 22.15  | 46.906 | 46.869 |
| H | 21.25  | 47.178 | 47.048 |
| H | 22.391 | 46.366 | 47.622 |
| O | 21.692 | 38.916 | 55.345 |

|   |        |        |        |
|---|--------|--------|--------|
| H | 20.917 | 39.471 | 55.436 |
| H | 22.345 | 39.319 | 55.916 |
| O | 18.566 | 44.892 | 50.363 |
| H | 18.436 | 44.071 | 49.887 |
| H | 17.699 | 45.112 | 50.704 |
| O | 17.32  | 45.539 | 53.467 |
| H | 16.641 | 45.419 | 52.803 |
| H | 17.44  | 46.488 | 53.517 |
| O | 26.823 | 37.255 | 54.282 |
| H | 26.263 | 37.871 | 53.811 |
| H | 26.314 | 37.012 | 55.056 |
| O | 16.626 | 29.681 | 49.307 |
| H | 16.421 | 28.871 | 49.775 |
| H | 15.79  | 29.96  | 48.933 |
| O | 24.939 | 41.445 | 50.563 |
| H | 24.321 | 41.208 | 51.255 |
| H | 24.624 | 40.977 | 49.79  |
| O | 28.164 | 44.083 | 51.749 |
| H | 28.258 | 43.31  | 51.192 |
| H | 27.255 | 44.053 | 52.047 |
| O | 19.879 | 48.019 | 47.287 |
| H | 19.103 | 48.58  | 47.28  |
| H | 20.118 | 47.952 | 48.212 |
| O | 27.959 | 43.767 | 44.683 |
| H | 27.337 | 43.871 | 45.404 |
| H | 27.514 | 43.186 | 44.066 |
| O | 20.791 | 42.172 | 47.303 |
| H | 20.467 | 42.992 | 46.932 |
| H | 20.784 | 41.557 | 46.569 |
| O | 13.68  | 44.034 | 50.317 |
| H | 13.878 | 43.186 | 49.919 |
| H | 13.147 | 43.82  | 51.083 |
| O | 26.445 | 32.152 | 55.068 |
| H | 25.488 | 32.162 | 55.053 |
| H | 26.679 | 32.715 | 55.806 |
| O | 20.728 | 54.659 | 54.346 |
| H | 20.916 | 53.75  | 54.112 |
| H | 20.349 | 54.607 | 55.223 |
| O | 12.364 | 34.378 | 58.947 |
| H | 12.225 | 33.791 | 58.204 |
| H | 12.249 | 35.256 | 58.583 |
| O | 24.977 | 39.078 | 53.503 |
| H | 24.84  | 40.025 | 53.513 |
| H | 24.151 | 38.72  | 53.178 |
| O | 18.257 | 46.985 | 56.84  |
| H | 17.331 | 47.114 | 56.634 |
| H | 18.719 | 47.25  | 56.045 |

|   |        |        |        |
|---|--------|--------|--------|
| O | 22.841 | 37.423 | 49.421 |
| H | 23.306 | 38.228 | 49.193 |
| H | 22.201 | 37.694 | 50.079 |
| O | 35.441 | 38.435 | 57.401 |
| H | 35.231 | 39.18  | 56.837 |
| H | 35.114 | 37.673 | 56.923 |
| O | 16.6   | 37.879 | 52.684 |
| H | 17.17  | 37.11  | 52.699 |
| H | 15.784 | 37.564 | 52.294 |
| O | 19.158 | 32.345 | 52.627 |
| H | 18.656 | 31.594 | 52.312 |
| H | 18.564 | 33.089 | 52.528 |
| O | 35.06  | 49.612 | 61.874 |
| H | 34.997 | 49.831 | 62.804 |
| H | 35.905 | 49.172 | 61.788 |
| O | 12.685 | 40.262 | 65.317 |
| H | 12.386 | 39.854 | 66.129 |
| H | 13.532 | 39.851 | 65.14  |
| O | 20.519 | 51.115 | 52.472 |
| H | 21.337 | 51.301 | 52.011 |
| H | 20.796 | 50.78  | 53.325 |
| O | 20.701 | 42.438 | 52.534 |
| H | 20.205 | 43.134 | 52.104 |
| H | 20.068 | 41.728 | 52.647 |
| O | 28.787 | 44.694 | 56.379 |
| H | 29.316 | 45.485 | 56.48  |
| H | 28.976 | 44.392 | 55.49  |
| O | 26.096 | 47.995 | 42.58  |
| H | 26.243 | 47.741 | 43.491 |
| H | 25.45  | 48.701 | 42.629 |
| O | 17.229 | 40.356 | 41.964 |
| H | 17.775 | 40.575 | 41.209 |
| H | 16.497 | 40.971 | 41.917 |
| O | 23.833 | 45.113 | 50.768 |
| H | 23.363 | 44.77  | 50.008 |
| H | 23.332 | 45.885 | 51.032 |
| O | 18.106 | 32.687 | 44.295 |
| H | 17.623 | 32.783 | 45.115 |
| H | 18.054 | 33.55  | 43.883 |
| O | 19.008 | 29.121 | 55.031 |
| H | 18.855 | 28.353 | 55.581 |
| H | 19.699 | 28.85  | 54.426 |
| O | 17.1   | 40.447 | 46.576 |
| H | 17.508 | 39.655 | 46.226 |
| H | 17.809 | 40.901 | 47.031 |
| O | 17.275 | 33.035 | 46.993 |
| H | 17.662 | 33.787 | 47.441 |

|   |        |        |        |
|---|--------|--------|--------|
| H | 17.932 | 32.345 | 47.072 |
| O | 23.105 | 55.856 | 53.369 |
| H | 23.563 | 55.055 | 53.114 |
| H | 22.422 | 55.56  | 53.971 |
| O | 4.478  | 36.092 | 48.231 |
| H | 5.082  | 35.36  | 48.354 |
| H | 3.638  | 35.768 | 48.555 |
| O | 14.492 | 57.131 | 51.248 |
| H | 14.096 | 57.738 | 51.873 |
| H | 14.252 | 56.263 | 51.572 |
| O | 21.302 | 35.915 | 52.516 |
| H | 20.81  | 36.584 | 52.993 |
| H | 22.055 | 35.728 | 53.076 |
| O | 26.783 | 43.624 | 47.458 |
| H | 26.896 | 44.518 | 47.781 |
| H | 27.223 | 43.078 | 48.109 |
| O | 27.116 | 37.021 | 44.533 |
| H | 27.963 | 36.575 | 44.521 |
| H | 26.762 | 36.887 | 43.654 |
| O | 13.275 | 38.783 | 55.802 |
| H | 12.701 | 38.897 | 55.045 |
| H | 13.677 | 39.642 | 55.93  |
| O | 29.404 | 43.705 | 53.952 |
| H | 30.23  | 43.225 | 53.885 |
| H | 29.196 | 43.95  | 53.05  |
| O | 32.954 | 38.381 | 45.545 |
| H | 33.183 | 38.409 | 46.474 |
| H | 33.796 | 38.348 | 45.091 |
| O | 31.357 | 36.008 | 48.831 |
| H | 31.973 | 35.312 | 48.604 |
| H | 30.833 | 35.641 | 49.544 |
| O | 27.801 | 39.807 | 51.439 |
| H | 27.259 | 40.39  | 51.971 |
| H | 27.2   | 39.123 | 51.145 |
| O | 12.519 | 33.687 | 51.92  |
| H | 13.018 | 32.87  | 51.955 |
| H | 12.039 | 33.639 | 51.093 |
| O | 24.918 | 37.195 | 46.337 |
| H | 25.091 | 38.128 | 46.212 |
| H | 25.479 | 36.759 | 45.695 |
| O | 14.757 | 37.26  | 50.418 |
| H | 14.947 | 36.44  | 49.963 |
| H | 13.897 | 37.12  | 50.816 |
| O | 9.844  | 32.818 | 43.803 |
| H | 9.157  | 32.215 | 43.518 |
| H | 9.468  | 33.27  | 44.558 |
| O | 32.475 | 38.624 | 48.247 |

|   |        |        |        |
|---|--------|--------|--------|
| H | 32.422 | 37.678 | 48.38  |
| H | 31.893 | 38.993 | 48.911 |
| O | 19.245 | 33.836 | 56.374 |
| H | 19.386 | 33.936 | 57.316 |
| H | 18.82  | 32.982 | 56.285 |
| O | 29.264 | 33.827 | 53.901 |
| H | 29.299 | 32.905 | 53.647 |
| H | 28.565 | 34.197 | 53.362 |
| O | 29.518 | 30.502 | 48.874 |
| H | 28.763 | 30.938 | 49.269 |
| H | 29.423 | 30.662 | 47.935 |
| O | 31.701 | 46.55  | 52.636 |
| H | 32.262 | 47.318 | 52.524 |
| H | 30.947 | 46.875 | 53.129 |
| O | 34.285 | 40.342 | 65.503 |
| H | 34.947 | 40.979 | 65.235 |
| H | 34.461 | 39.572 | 64.962 |
| O | 21.191 | 42.431 | 57.476 |
| H | 20.548 | 42.192 | 58.144 |
| H | 20.699 | 42.957 | 56.847 |
| O | 18.084 | 44.291 | 60.115 |
| H | 18.907 | 44.768 | 60.224 |
| H | 17.406 | 44.929 | 60.337 |
| O | 19.833 | 37.627 | 53.832 |
| H | 19.268 | 37.541 | 54.6   |
| H | 20.586 | 38.129 | 54.143 |
| O | 29.164 | 38.859 | 54.425 |
| H | 28.476 | 38.236 | 54.193 |
| H | 28.832 | 39.705 | 54.126 |
| O | 22.085 | 30.88  | 51.524 |
| H | 23.041 | 30.919 | 51.544 |
| H | 21.814 | 31.763 | 51.27  |
| O | 12.543 | 55.266 | 59.884 |
| H | 11.916 | 55.93  | 60.17  |
| H | 12.771 | 54.792 | 60.683 |
| O | 21.08  | 30.117 | 49.28  |
| H | 21.35  | 30.127 | 50.198 |
| H | 21.636 | 30.774 | 48.86  |
| O | 18.063 | 34.823 | 52.047 |
| H | 18.87  | 35.118 | 52.468 |
| H | 17.385 | 34.953 | 52.711 |
| O | 23.909 | 27.382 | 54.719 |
| H | 24.049 | 27.922 | 55.496 |
| H | 24.386 | 27.834 | 54.023 |
| O | 26.447 | 31.121 | 48.978 |
| H | 25.976 | 30.91  | 48.172 |
| H | 26.406 | 32.075 | 49.036 |

|   |        |        |        |
|---|--------|--------|--------|
| O | 14.239 | 49.686 | 51.374 |
| H | 13.434 | 49.285 | 51.703 |
| H | 13.95  | 50.507 | 50.974 |
| O | 14.545 | 25.778 | 48.838 |
| H | 14.912 | 25.828 | 49.72  |
| H | 15.293 | 25.924 | 48.259 |
| O | 10.851 | 34.259 | 53.891 |
| H | 10.663 | 33.37  | 54.19  |
| H | 11.521 | 34.149 | 53.216 |
| O | 32.232 | 48.143 | 50.463 |
| H | 32.01  | 49.067 | 50.579 |
| H | 31.552 | 47.672 | 50.944 |
| O | 19.899 | 47.541 | 50.051 |
| H | 20.477 | 47.115 | 50.683 |
| H | 19.07  | 47.068 | 50.128 |
| O | 16.661 | 36.708 | 46.259 |
| H | 16.729 | 37.223 | 45.455 |
| H | 15.965 | 36.076 | 46.08  |
| O | 22.271 | 40.852 | 37.903 |
| H | 22.577 | 41.758 | 37.857 |
| H | 23.06  | 40.342 | 38.085 |
| O | 9.962  | 37.052 | 37.563 |
| H | 9.702  | 37.041 | 38.484 |
| H | 9.554  | 37.842 | 37.208 |
| O | 21.92  | 49.742 | 38.675 |
| H | 22.145 | 49.071 | 39.32  |
| H | 22.416 | 49.499 | 37.894 |
| O | 8.859  | 53.688 | 35.873 |
| H | 9.075  | 54.393 | 35.262 |
| H | 8.869  | 52.895 | 35.336 |
| O | 22.587 | 37.681 | 39.541 |
| H | 23.054 | 38.517 | 39.539 |
| H | 21.749 | 37.875 | 39.12  |
| O | 10.328 | 35.371 | 41.505 |
| H | 9.742  | 34.649 | 41.277 |
| H | 9.845  | 36.159 | 41.257 |
| O | 29.661 | 47.742 | 39.026 |
| H | 29.456 | 47.172 | 38.285 |
| H | 30.115 | 47.173 | 39.648 |
| O | 27.74  | 44.054 | 38.092 |
| H | 27.009 | 44.137 | 38.704 |
| H | 27.494 | 44.604 | 37.349 |
| O | 11.797 | 34.253 | 47.81  |
| H | 11.631 | 33.766 | 48.617 |
| H | 10.955 | 34.652 | 47.593 |
| O | 22.31  | 34.394 | 38.233 |
| H | 21.966 | 33.512 | 38.096 |

|   |        |        |        |
|---|--------|--------|--------|
| H | 21.992 | 34.894 | 37.481 |
| O | 17.969 | 38.284 | 37.097 |
| H | 18.625 | 37.796 | 37.595 |
| H | 18.3   | 38.283 | 36.199 |
| O | 16.859 | 34.202 | 39.85  |
| H | 16.097 | 33.993 | 39.311 |
| H | 17.418 | 33.428 | 39.785 |
| O | 16.057 | 34.33  | 42.383 |
| H | 16.815 | 34.669 | 42.859 |
| H | 16.332 | 34.325 | 41.467 |
| O | 15.006 | 37.342 | 39.11  |
| H | 15.423 | 36.777 | 39.76  |
| H | 15.266 | 38.228 | 39.361 |
| O | 17.911 | 45.186 | 43.39  |
| H | 17.95  | 46.141 | 43.436 |
| H | 17.314 | 44.937 | 44.095 |
| O | 10.498 | 40.024 | 33.675 |
| H | 11.102 | 39.453 | 34.15  |
| H | 10.673 | 39.841 | 32.752 |
| O | 27.963 | 41.607 | 36.479 |
| H | 28.162 | 42.185 | 37.215 |
| H | 27.766 | 40.763 | 36.884 |
| O | 24.625 | 47.056 | 38.458 |
| H | 24.346 | 46.767 | 37.589 |
| H | 25.369 | 47.634 | 38.291 |
| O | 24.219 | 42.441 | 40.688 |
| H | 24.606 | 42.51  | 41.56  |
| H | 24.552 | 43.204 | 40.216 |
| O | 14.345 | 38.028 | 43.932 |
| H | 14.089 | 38.851 | 43.515 |
| H | 15.271 | 38.145 | 44.143 |
| O | 13.914 | 42.542 | 38.296 |
| H | 14.285 | 43.112 | 38.97  |
| H | 14.675 | 42.19  | 37.834 |
| O | 19.846 | 42.34  | 38.609 |
| H | 19.164 | 41.683 | 38.751 |
| H | 20.574 | 41.85  | 38.226 |
| O | 28.574 | 40.836 | 40.309 |
| H | 28.6   | 41.752 | 40.033 |
| H | 28.731 | 40.866 | 41.253 |
| O | 18.075 | 45.813 | 40.678 |
| H | 17.388 | 46.418 | 40.955 |
| H | 18.314 | 45.34  | 41.475 |
| O | 10.837 | 35.694 | 45.055 |
| H | 11.39  | 36.472 | 45.125 |
| H | 10.515 | 35.548 | 45.945 |
| O | 24.098 | 45.412 | 32.736 |

|   |        |        |        |
|---|--------|--------|--------|
| H | 25.006 | 45.123 | 32.831 |
| H | 23.617 | 44.909 | 33.394 |
| O | 20.065 | 42.747 | 42.909 |
| H | 20.636 | 43.031 | 42.195 |
| H | 19.423 | 43.451 | 42.996 |
| O | 13.231 | 29.74  | 43.601 |
| H | 13.053 | 29.802 | 42.663 |
| H | 13.653 | 30.571 | 43.82  |
| O | 29.072 | 37.851 | 47.581 |
| H | 28.497 | 37.129 | 47.835 |
| H | 29.957 | 37.509 | 47.705 |
| O | 8.442  | 37.798 | 43.522 |
| H | 8.065  | 38.575 | 43.934 |
| H | 7.989  | 37.064 | 43.936 |
| O | 21.114 | 40.463 | 34.959 |
| H | 21.817 | 40.493 | 34.31  |
| H | 21.339 | 41.149 | 35.588 |
| O | 27.806 | 41.581 | 43.07  |
| H | 26.927 | 41.236 | 43.227 |
| H | 28.39  | 40.94  | 43.475 |
| O | 24.083 | 43.447 | 46.484 |
| H | 24.132 | 44.149 | 45.835 |
| H | 24.919 | 43.491 | 46.948 |
| O | 17.203 | 53.872 | 31.519 |
| H | 17.218 | 54.643 | 30.951 |
| H | 17.422 | 54.21  | 32.387 |
| O | 25.623 | 49.857 | 32.918 |
| H | 25.555 | 50.811 | 32.872 |
| H | 26.178 | 49.62  | 32.176 |
| O | 13.094 | 39.004 | 48.996 |
| H | 13.674 | 38.429 | 49.496 |
| H | 13.068 | 38.616 | 48.122 |
| O | 17.093 | 28.98  | 46.212 |
| H | 17.702 | 29.458 | 46.775 |
| H | 16.227 | 29.283 | 46.485 |
| O | 22.465 | 44.38  | 48.518 |
| H | 21.653 | 43.893 | 48.659 |
| H | 22.878 | 43.947 | 47.771 |
| O | 18.933 | 38.707 | 34.432 |
| H | 19.172 | 37.872 | 34.029 |
| H | 19.757 | 39.189 | 34.494 |
| O | 9.125  | 36.063 | 34.259 |
| H | 9.015  | 35.226 | 33.807 |
| H | 9.755  | 35.877 | 34.956 |
| O | 18.54  | 34.483 | 49.333 |
| H | 19.391 | 34.064 | 49.468 |
| H | 18.241 | 34.706 | 50.214 |



|   |        |        |        |
|---|--------|--------|--------|
| O | 11.851 | 32.506 | 38.946 |
| H | 11.586 | 31.66  | 38.585 |
| H | 11.33  | 33.146 | 38.462 |
| O | 5.262  | 38.026 | 27.265 |
| H | 5.026  | 38.59  | 28.001 |
| H | 5.319  | 37.149 | 27.644 |
| O | 18.067 | 33.988 | 35.217 |
| H | 17.861 | 33.257 | 35.8   |
| H | 17.223 | 34.406 | 35.048 |
| O | 21.7   | 41.306 | 27.813 |
| H | 21.283 | 42.168 | 27.813 |
| H | 21.671 | 41.026 | 28.728 |
| O | 20.03  | 39.605 | 40.616 |
| H | 19.522 | 39.22  | 41.33  |
| H | 20.053 | 40.541 | 40.816 |
| O | 20.192 | 35.215 | 36.576 |
| H | 19.495 | 34.769 | 36.095 |
| H | 19.829 | 35.351 | 37.452 |
| O | 22.907 | 43.719 | 37.641 |
| H | 22.202 | 44.176 | 38.1   |
| H | 23.678 | 43.852 | 38.194 |
| O | 24.574 | 39.833 | 38.994 |
| H | 25.503 | 39.756 | 38.778 |
| H | 24.56  | 40.289 | 39.836 |
| O | 21.288 | 45.314 | 39.208 |
| H | 21.49  | 45.944 | 39.899 |
| H | 20.502 | 45.663 | 38.787 |
| O | 19.129 | 43.272 | 34     |
| H | 18.297 | 43.689 | 33.777 |
| H | 19.588 | 43.922 | 34.531 |
| O | 19.326 | 46.786 | 29.607 |
| H | 18.716 | 46.158 | 29.994 |
| H | 20.192 | 46.416 | 29.777 |
| O | 12.85  | 33.094 | 44.987 |
| H | 13.32  | 33.764 | 45.483 |
| H | 12.464 | 32.528 | 45.655 |
| O | 15.732 | 45.713 | 36.595 |
| H | 16.263 | 44.963 | 36.864 |
| H | 15.585 | 45.578 | 35.658 |
| O | 27.255 | 39.096 | 38.317 |
| H | 27.531 | 38.203 | 38.522 |
| H | 27.624 | 39.628 | 39.021 |
| O | 24.464 | 43.41  | 34.826 |
| H | 25.417 | 43.413 | 34.738 |
| H | 24.309 | 43.579 | 35.755 |
| O | 20.785 | 45.012 | 35.216 |
| H | 21.568 | 45.097 | 35.761 |

|   |        |        |        |
|---|--------|--------|--------|
| H | 20.257 | 45.78  | 35.434 |
| O | 11.03  | 39.632 | 43.467 |
| H | 10.091 | 39.466 | 43.544 |
| H | 11.389 | 38.82  | 43.109 |
| O | 17.709 | 43.845 | 37.086 |
| H | 17.876 | 43.014 | 36.641 |
| H | 18.112 | 43.741 | 37.948 |
| O | 30.502 | 46.514 | 41.921 |
| H | 29.941 | 46.58  | 42.695 |
| H | 30.637 | 45.574 | 41.803 |
| O | 10.702 | 32.106 | 35.407 |
| H | 9.757  | 32.125 | 35.558 |
| H | 10.893 | 32.94  | 34.977 |
| O | 27.852 | 51.08  | 42.767 |
| H | 26.973 | 51.186 | 42.403 |
| H | 28.265 | 50.424 | 42.206 |
| O | 25.475 | 39.627 | 42.59  |
| H | 25.834 | 38.74  | 42.615 |
| H | 24.547 | 39.505 | 42.391 |
| O | 6.345  | 45.807 | 31.658 |
| H | 5.61   | 46.348 | 31.371 |
| H | 6.455  | 46.024 | 32.584 |
| O | 15.122 | 31.333 | 47.332 |
| H | 15.687 | 31.993 | 46.931 |
| H | 14.692 | 30.904 | 46.592 |
| O | 17.634 | 47.993 | 44.285 |
| H | 16.776 | 47.838 | 43.888 |
| H | 17.66  | 48.938 | 44.436 |
| O | 14.529 | 39.79  | 40.215 |
| H | 13.861 | 40.279 | 39.736 |
| H | 14.791 | 40.375 | 40.926 |
| O | 18.961 | 39.455 | 30.11  |
| H | 18.243 | 38.86  | 29.894 |
| H | 18.717 | 39.828 | 30.957 |
| O | 19.778 | 37.533 | 38.802 |
| H | 19.826 | 38.398 | 39.209 |
| H | 19.616 | 36.934 | 39.531 |
| O | 19.949 | 54.042 | 32.649 |
| H | 19.319 | 53.642 | 33.248 |
| H | 19.576 | 54.9   | 32.447 |
| O | 19.279 | 36.271 | 33.362 |
| H | 18.57  | 36.301 | 32.719 |
| H | 19.454 | 35.338 | 33.482 |
| O | 19.388 | 47.64  | 33.85  |
| H | 19.361 | 48.562 | 33.596 |
| H | 18.548 | 47.286 | 33.558 |
| O | 16.706 | 39.752 | 25.366 |

|   |        |        |        |
|---|--------|--------|--------|
| H | 15.837 | 40.147 | 25.295 |
| H | 17.012 | 39.683 | 24.462 |
| O | 7.633  | 35.722 | 26.771 |
| H | 7.352  | 35.447 | 25.898 |
| H | 7.227  | 35.089 | 27.364 |
| O | 26.193 | 45.6   | 36.226 |
| H | 26.872 | 46.275 | 36.221 |
| H | 25.371 | 46.088 | 36.17  |
| O | 14.904 | 44.567 | 40.369 |
| H | 14.435 | 45.167 | 40.948 |
| H | 15.728 | 45.015 | 40.177 |
| O | 10.982 | 43.163 | 31.577 |
| H | 10.922 | 42.997 | 30.636 |
| H | 10.226 | 43.717 | 31.772 |
| O | 12.705 | 37.178 | 46.043 |
| H | 13.162 | 37.599 | 45.314 |
| H | 13.26  | 36.433 | 46.274 |
| O | 17.143 | 44.225 | 24.016 |
| H | 18.034 | 43.921 | 24.19  |
| H | 16.848 | 44.591 | 24.85  |
| O | 23.266 | 34.685 | 48.563 |
| H | 23.121 | 35.596 | 48.816 |
| H | 22.494 | 34.455 | 48.045 |
| O | 29.219 | 46.78  | 50.87  |
| H | 28.869 | 45.89  | 50.84  |
| H | 29.736 | 46.808 | 51.675 |
| O | 12.5   | 41.863 | 45.383 |
| H | 12.065 | 41.796 | 46.233 |
| H | 12.031 | 41.245 | 44.824 |
| O | 24.209 | 41.605 | 31.181 |
| H | 24.496 | 42.498 | 30.992 |
| H | 23.488 | 41.451 | 30.57  |
| O | 25.808 | 33.702 | 48.327 |
| H | 24.943 | 34.091 | 48.457 |
| H | 25.65  | 32.956 | 47.748 |
| O | 12.635 | 42.741 | 52.649 |
| H | 13.591 | 42.693 | 52.642 |
| H | 12.361 | 41.98  | 53.161 |
| O | 15.78  | 41.284 | 37.152 |
| H | 15.407 | 41.09  | 36.292 |
| H | 16.725 | 41.2   | 37.028 |
| O | 13.537 | 35.742 | 43.059 |
| H | 13.831 | 36.52  | 43.533 |
| H | 14.32  | 35.197 | 42.983 |
| O | 18.942 | 35.197 | 46.062 |
| H | 18.833 | 34.997 | 45.132 |
| H | 18.337 | 35.92  | 46.224 |

|   |        |        |        |
|---|--------|--------|--------|
| O | 29.567 | 35.056 | 50.832 |
| H | 28.867 | 35.266 | 51.451 |
| H | 29.543 | 34.101 | 50.761 |
| O | 15.048 | 31.712 | 42.329 |
| H | 15.488 | 32.561 | 42.277 |
| H | 15.683 | 31.14  | 42.76  |
| O | 22.672 | 38.944 | 42.586 |
| H | 22.182 | 38.385 | 43.189 |
| H | 22.21  | 38.859 | 41.752 |
| O | 18.044 | 44.003 | 30.583 |
| H | 17.317 | 43.495 | 30.222 |
| H | 17.702 | 44.362 | 31.402 |
| O | 16.015 | 53.605 | 39.429 |
| H | 16.415 | 54.475 | 39.43  |
| H | 16.757 | 53.001 | 39.395 |
| O | 17.19  | 36.044 | 31.351 |
| H | 17.042 | 35.127 | 31.12  |
| H | 16.595 | 36.533 | 30.782 |
| O | 28.044 | 51.385 | 47.933 |
| H | 27.84  | 51.288 | 47.002 |
| H | 28.461 | 50.559 | 48.174 |
| O | 19.352 | 51.14  | 35.596 |
| H | 19.334 | 50.276 | 36.01  |
| H | 20.103 | 51.106 | 35.004 |
| O | 21.535 | 46.971 | 32.03  |
| H | 20.648 | 46.945 | 32.388 |
| H | 21.948 | 46.171 | 32.355 |
| O | 11.485 | 41.961 | 41.44  |
| H | 11.62  | 41.617 | 42.323 |
| H | 10.943 | 42.739 | 41.567 |
| O | 16.185 | 49.734 | 41.375 |
| H | 16.743 | 50.344 | 41.857 |
| H | 15.853 | 50.245 | 40.637 |
| O | 9.134  | 43.66  | 41.802 |
| H | 9.282  | 44.152 | 42.61  |
| H | 8.694  | 44.28  | 41.22  |
| O | 31.843 | 46.707 | 45.166 |
| H | 32.239 | 46.975 | 45.995 |
| H | 32.461 | 46.076 | 44.798 |
| O | 12.349 | 38.496 | 35.138 |
| H | 13.15  | 38.108 | 35.49  |
| H | 12.246 | 39.314 | 35.625 |
| O | 24.521 | 43.522 | 43.47  |
| H | 23.873 | 42.821 | 43.546 |
| H | 24.138 | 44.254 | 43.954 |
| O | 19.705 | 40.801 | 44.952 |
| H | 19.87  | 40.11  | 44.31  |

|   |        |        |        |
|---|--------|--------|--------|
| H | 19.225 | 41.47  | 44.465 |
| O | 9.41   | 38.912 | 46.347 |
| H | 9.069  | 38.537 | 45.535 |
| H | 10.189 | 38.391 | 46.543 |
| O | 12.61  | 36.475 | 33.257 |
| H | 12.256 | 37.052 | 33.933 |
| H | 13.41  | 36.912 | 32.964 |
| O | 18.172 | 36.376 | 27.874 |
| H | 18.379 | 35.482 | 28.147 |
| H | 18.863 | 36.912 | 28.262 |
| O | 10.195 | 32.863 | 28.98  |
| H | 10.668 | 33.045 | 29.792 |
| H | 10.546 | 32.024 | 28.681 |
| O | 5.628  | 26.685 | 41.244 |
| H | 5.245  | 26.662 | 40.367 |
| H | 5.576  | 25.78  | 41.551 |
| O | 7.94   | 27.359 | 31.139 |
| H | 8.239  | 27.634 | 32.006 |
| H | 7.573  | 26.486 | 31.278 |
| O | 15.233 | 42.114 | 42.017 |
| H | 15.17  | 43.054 | 41.846 |
| H | 14.86  | 42.004 | 42.891 |
| O | 18.866 | 46.355 | 38.192 |
| H | 18.59  | 45.518 | 37.818 |
| H | 18.664 | 46.278 | 39.125 |
| O | 24.989 | 28.827 | 43.877 |
| H | 24.676 | 28.953 | 42.982 |
| H | 24.918 | 29.692 | 44.28  |
| O | 30.02  | 43.056 | 41.868 |
| H | 29.064 | 43.101 | 41.85  |
| H | 30.228 | 42.713 | 42.737 |
| O | 14.684 | 25.159 | 45.12  |
| H | 15.038 | 25.251 | 46.004 |
| H | 15.391 | 25.453 | 44.546 |
| O | 15.83  | 47.151 | 42.205 |
| H | 14.92  | 46.879 | 42.324 |
| H | 15.772 | 47.979 | 41.726 |
| O | 28.288 | 46.742 | 47.507 |
| H | 27.482 | 46.688 | 48.021 |
| H | 28.786 | 45.964 | 47.761 |
| O | 25.235 | 52.134 | 48.295 |
| H | 26.005 | 51.565 | 48.287 |
| H | 25.127 | 52.403 | 47.383 |
| O | 25.918 | 52.277 | 41.103 |
| H | 26.742 | 52.303 | 40.615 |
| H | 25.274 | 51.966 | 40.467 |
| O | 20.479 | 48.409 | 44.627 |

|   |        |        |        |
|---|--------|--------|--------|
| H | 20.275 | 48.136 | 45.521 |
| H | 19.743 | 48.09  | 44.105 |
| O | 16.736 | 44.813 | 32.927 |
| H | 15.836 | 44.625 | 32.658 |
| H | 16.738 | 45.751 | 33.118 |
| O | 13.308 | 31.158 | 34.778 |
| H | 12.628 | 31.672 | 35.214 |
| H | 12.932 | 30.936 | 33.926 |
| O | 14.955 | 48.744 | 34.671 |
| H | 14.161 | 48.232 | 34.822 |
| H | 15.109 | 49.198 | 35.499 |
| O | 21.707 | 50.882 | 44.305 |
| H | 21.353 | 49.999 | 44.41  |
| H | 21.12  | 51.437 | 44.818 |
| O | 19.903 | 31.222 | 43.069 |
| H | 20.305 | 31.018 | 43.914 |
| H | 19.191 | 31.825 | 43.283 |
| O | 12.672 | 56.401 | 38.465 |
| H | 12.181 | 55.862 | 37.845 |
| H | 12.215 | 56.284 | 39.298 |
| O | 16.895 | 47.521 | 32.904 |
| H | 16.277 | 48.016 | 33.442 |
| H | 17.189 | 48.145 | 32.241 |
| O | 35.834 | 49.011 | 48.512 |
| H | 35.438 | 48.407 | 49.141 |
| H | 35.686 | 48.6   | 47.66  |
| O | 19.018 | 31.931 | 21.645 |
| H | 18.106 | 32.064 | 21.904 |
| H | 19.183 | 31.004 | 21.816 |
| O | 23.097 | 40.886 | 18.485 |
| H | 23.213 | 40.236 | 19.179 |
| H | 22.262 | 40.654 | 18.078 |
| O | 16.727 | 43.338 | 21.431 |
| H | 16.114 | 42.604 | 21.479 |
| H | 16.84  | 43.615 | 22.34  |
| O | 9.304  | 39.749 | 17.324 |
| H | 9.364  | 39.117 | 18.041 |
| H | 8.578  | 39.432 | 16.786 |
| O | 14.927 | 37.763 | 26.193 |
| H | 15.64  | 38.307 | 25.858 |
| H | 14.335 | 37.66  | 25.447 |
| O | 26.025 | 42.277 | 13.445 |
| H | 25.264 | 41.867 | 13.033 |
| H | 25.78  | 42.365 | 14.366 |
| O | 19.731 | 49.783 | 21.525 |
| H | 19.432 | 50.255 | 22.302 |
| H | 20.073 | 48.955 | 21.864 |

|   |        |        |        |
|---|--------|--------|--------|
| O | 14.952 | 28.44  | 29.678 |
| H | 14.134 | 28.433 | 30.174 |
| H | 15.237 | 29.354 | 29.7   |
| O | 20.137 | 30.765 | 18.03  |
| H | 20.579 | 31.049 | 17.23  |
| H | 20.255 | 31.493 | 18.64  |
| O | 12.693 | 38.806 | 13.701 |
| H | 13.549 | 38.397 | 13.58  |
| H | 12.729 | 39.182 | 14.58  |
| O | 17.747 | 32.944 | 19.017 |
| H | 18.221 | 32.813 | 19.838 |
| H | 18.394 | 33.325 | 18.424 |
| O | 18.938 | 38.589 | 17.421 |
| H | 18.541 | 38.464 | 18.283 |
| H | 18.815 | 37.75  | 16.977 |
| O | 16.193 | 32.876 | 25.437 |
| H | 16.283 | 33.681 | 25.948 |
| H | 15.579 | 32.34  | 25.94  |
| O | 17.843 | 43.72  | 18.918 |
| H | 17.453 | 43.648 | 19.79  |
| H | 18.697 | 43.297 | 19.002 |
| O | 10.903 | 40.092 | 11.102 |
| H | 10.294 | 40.81  | 10.931 |
| H | 11.474 | 40.421 | 11.796 |
| O | 22.474 | 34.06  | 13.71  |
| H | 22.546 | 33.109 | 13.786 |
| H | 21.947 | 34.322 | 14.465 |
| O | 14.092 | 40.693 | 25.391 |
| H | 13.636 | 40.737 | 26.231 |
| H | 13.822 | 41.488 | 24.93  |
| O | 15.69  | 35.122 | 27.477 |
| H | 15.587 | 35.88  | 26.901 |
| H | 16.615 | 35.135 | 27.725 |
| O | 20.691 | 34.154 | 22.267 |
| H | 20.358 | 33.273 | 22.094 |
| H | 21.572 | 34.154 | 21.893 |
| O | 24.786 | 45.246 | 26.015 |
| H | 24.604 | 45.509 | 25.113 |
| H | 24.814 | 44.29  | 25.986 |
| O | 15.618 | 37.962 | 29.956 |
| H | 14.725 | 37.685 | 29.748 |
| H | 15.759 | 38.74  | 29.418 |
| O | 20.71  | 45.165 | 12.24  |
| H | 20.63  | 44.546 | 11.514 |
| H | 21.635 | 45.132 | 12.482 |
| O | 21.621 | 40.261 | 30.277 |
| H | 20.728 | 40.031 | 30.017 |

|   |        |        |        |
|---|--------|--------|--------|
| H | 21.781 | 39.744 | 31.067 |
| O | 29.42  | 31.126 | 13.787 |
| H | 29.83  | 30.555 | 14.436 |
| H | 30.074 | 31.803 | 13.616 |
| O | 8.258  | 46.507 | 13.073 |
| H | 8.151  | 46.25  | 12.158 |
| H | 7.464  | 46.193 | 13.505 |
| O | 7.64   | 43.213 | 23.887 |
| H | 7.194  | 43.816 | 24.482 |
| H | 7.098  | 43.21  | 23.099 |
| O | 6.606  | 36.692 | 22.626 |
| H | 7.113  | 37.352 | 23.099 |
| H | 6.406  | 36.027 | 23.285 |
| O | 22.883 | 46.615 | 28.269 |
| H | 23.418 | 45.943 | 27.847 |
| H | 22.164 | 46.768 | 27.656 |
| O | 24.083 | 40.804 | 12.392 |
| H | 23.961 | 40.477 | 11.501 |
| H | 23.225 | 40.703 | 12.804 |
| O | 24.91  | 42.438 | 15.844 |
| H | 23.985 | 42.565 | 16.055 |
| H | 25.346 | 42.391 | 16.695 |
| O | 24.771 | 44.748 | 10.493 |
| H | 24.882 | 45.625 | 10.126 |
| H | 24.035 | 44.833 | 11.099 |
| O | 28.137 | 41.467 | 17.155 |
| H | 28.485 | 40.618 | 16.882 |
| H | 27.362 | 41.253 | 17.674 |
| O | 21.249 | 45.068 | 18.917 |
| H | 21.302 | 45.958 | 19.266 |
| H | 20.808 | 44.567 | 19.603 |
| O | 16.698 | 29.448 | 20.711 |
| H | 17.31  | 29.111 | 21.366 |
| H | 17.225 | 29.543 | 19.918 |
| O | 20.356 | 28.691 | 13.414 |
| H | 20.913 | 28.786 | 14.186 |
| H | 19.604 | 29.257 | 13.59  |
| O | 18.245 | 36.139 | 15.733 |
| H | 17.392 | 35.71  | 15.8   |
| H | 18.853 | 35.432 | 15.518 |
| O | 14.052 | 35.654 | 29.843 |
| H | 13.342 | 36.295 | 29.796 |
| H | 14.403 | 35.62  | 28.953 |
| O | 10.781 | 29.317 | 16.554 |
| H | 10.967 | 30.237 | 16.368 |
| H | 10.068 | 29.342 | 17.193 |
| O | 8.806  | 34.734 | 12.371 |



|   |        |        |        |
|---|--------|--------|--------|
| H | 8.133  | 34.902 | 11.712 |
| H | 9.228  | 35.582 | 12.505 |
| O | 12.309 | 37.028 | 18.998 |
| H | 11.482 | 36.856 | 19.447 |
| H | 12.916 | 37.271 | 19.697 |
| O | 18.455 | 41.839 | 14.236 |
| H | 19.277 | 41.349 | 14.218 |
| H | 18.533 | 42.466 | 13.517 |
| O | 14.497 | 33.006 | 15.014 |
| H | 14.415 | 33.941 | 15.201 |
| H | 14.851 | 32.631 | 15.82  |
| O | 15.964 | 33.643 | 30.569 |
| H | 15.402 | 33.289 | 31.257 |
| H | 15.368 | 34.125 | 29.996 |
| O | 12.041 | 39.748 | 21.648 |
| H | 11.341 | 39.436 | 21.074 |
| H | 12.587 | 40.296 | 21.084 |
| O | 18.816 | 37.934 | 25.491 |
| H | 18.325 | 38.75  | 25.588 |
| H | 18.549 | 37.404 | 26.242 |
| O | 25.83  | 41.561 | 18.68  |
| H | 24.996 | 41.091 | 18.656 |
| H | 25.627 | 42.386 | 19.122 |
| O | 26.745 | 31.68  | 13.41  |
| H | 27.676 | 31.459 | 13.43  |
| H | 26.322 | 30.984 | 13.912 |
| O | 20.414 | 40.844 | 23.867 |
| H | 19.726 | 40.429 | 24.388 |
| H | 21.182 | 40.842 | 24.438 |
| O | 9.527  | 42.541 | 17.74  |
| H | 9.994  | 42.678 | 18.564 |
| H | 9.589  | 41.598 | 17.584 |
| O | 18.394 | 40.158 | 20.318 |
| H | 18.441 | 41.104 | 20.456 |
| H | 17.621 | 40.035 | 19.767 |
| O | 10.124 | 28.118 | 29.43  |
| H | 9.408  | 27.836 | 29.999 |
| H | 10.201 | 27.42  | 28.779 |
| O | 13.094 | 41.224 | 27.913 |
| H | 12.263 | 41.099 | 28.371 |
| H | 13.225 | 42.172 | 27.909 |
| O | 22.202 | 39.01  | 26.477 |
| H | 22.659 | 39.467 | 25.771 |
| H | 22.048 | 39.684 | 27.139 |
| O | 29.747 | 38.368 | 13.734 |
| H | 29.099 | 38.487 | 13.04  |
| H | 30.385 | 39.067 | 13.59  |

|   |        |        |        |
|---|--------|--------|--------|
| O | 21.312 | 39.331 | 20.144 |
| H | 21.676 | 40.084 | 20.611 |
| H | 20.424 | 39.6   | 19.91  |
| O | 15.198 | 35.506 | 15.37  |
| H | 15.172 | 36.134 | 16.092 |
| H | 14.695 | 35.923 | 14.671 |
| O | 23.478 | 44.522 | 13.063 |
| H | 23.836 | 43.637 | 13.126 |
| H | 23.872 | 44.993 | 13.797 |
| O | 22.763 | 41.615 | 24.949 |
| H | 22.257 | 42.427 | 24.982 |
| H | 23.553 | 41.805 | 25.455 |
| O | 9.028  | 33.773 | 16.062 |
| H | 8.085  | 33.936 | 16.05  |
| H | 9.418  | 34.601 | 15.783 |
| O | 23.653 | 43.672 | 22.047 |
| H | 24.361 | 43.89  | 21.44  |
| H | 23.77  | 44.278 | 22.779 |
| O | 24.669 | 38.709 | 2.73   |
| H | 25.449 | 38.748 | 3.284  |
| H | 24.653 | 39.553 | 2.279  |
| O | 19.753 | 50.177 | 11.337 |
| H | 20.441 | 50.671 | 10.892 |
| H | 20.118 | 49.984 | 12.201 |
| O | 12.518 | 28.764 | 30.888 |
| H | 12.029 | 29.54  | 31.161 |
| H | 11.902 | 28.271 | 30.346 |
| O | 11.067 | 47.643 | 27.716 |
| H | 11.086 | 48.351 | 27.073 |
| H | 11.291 | 48.066 | 28.545 |
| O | 23.041 | 41.476 | 33.488 |
| H | 23.716 | 42.071 | 33.815 |
| H | 23.347 | 41.224 | 32.616 |
| O | 16.887 | 45.104 | 16.78  |
| H | 17.17  | 44.586 | 17.534 |
| H | 16.799 | 45.994 | 17.12  |
| O | 14.818 | 44.257 | 12.281 |
| H | 15.554 | 44.066 | 12.862 |
| H | 15.144 | 44.052 | 11.405 |
| O | 25.898 | 44.132 | 19.345 |
| H | 26.705 | 44.508 | 18.993 |
| H | 25.395 | 44.887 | 19.65  |
| O | 21.349 | 47.656 | 5.222  |
| H | 21.666 | 46.81  | 5.54   |
| H | 20.528 | 47.796 | 5.694  |
| O | 19.681 | 45.651 | 16.598 |
| H | 19.975 | 45.201 | 17.389 |

|   |        |        |        |
|---|--------|--------|--------|
| H | 18.73  | 45.54  | 16.598 |
| O | 16.956 | 44.441 | 14.286 |
| H | 17.048 | 44.896 | 15.123 |
| H | 17.294 | 43.562 | 14.453 |
| O | 16.855 | 41.138 | 16.349 |
| H | 17.29  | 41.69  | 15.699 |
| H | 17.565 | 40.64  | 16.755 |
| O | 25.579 | 47.735 | 22.177 |
| H | 26.27  | 47.618 | 22.83  |
| H | 25.531 | 48.682 | 22.046 |
| O | 10.686 | 40.354 | 25.172 |
| H | 10.043 | 40.198 | 24.48  |
| H | 11.379 | 40.858 | 24.747 |
| O | 12.673 | 40.916 | 31.432 |
| H | 13.59  | 40.785 | 31.674 |
| H | 12.387 | 41.655 | 31.969 |
| O | 18.736 | 47.856 | 6.263  |
| H | 18.81  | 48.588 | 6.876  |
| H | 17.793 | 47.739 | 6.145  |
| O | 25.081 | 42.086 | 26.355 |
| H | 25.503 | 41.29  | 26.032 |
| H | 25.441 | 42.21  | 27.233 |
| O | 21.316 | 42.98  | 31.604 |
| H | 20.499 | 43.179 | 32.061 |
| H | 21.634 | 42.179 | 32.02  |
| O | 23.655 | 46.011 | 15.73  |
| H | 22.761 | 46.296 | 15.919 |
| H | 23.783 | 45.243 | 16.287 |
| O | 15.426 | 40.403 | 28.68  |
| H | 14.565 | 40.777 | 28.495 |
| H | 15.978 | 40.702 | 27.958 |
| O | 18.553 | 39.112 | 9.509  |
| H | 17.918 | 39.147 | 8.794  |
| H | 18.443 | 38.238 | 9.884  |
| O | 23.182 | 43.856 | 17.492 |
| H | 23.4   | 43.135 | 18.083 |
| H | 22.532 | 44.37  | 17.97  |
| O | 24.661 | 40.658 | 5.847  |
| H | 24.345 | 41.438 | 5.393  |
| H | 23.959 | 40.435 | 6.458  |
| O | 15.503 | 43.802 | 29.813 |
| H | 14.975 | 44.596 | 29.891 |
| H | 15.275 | 43.446 | 28.954 |
| O | 16.972 | 39.624 | 22.759 |
| H | 16.205 | 40.157 | 22.551 |
| H | 17.461 | 39.578 | 21.938 |
| O | 19.785 | 43.439 | 24.141 |

|   |        |        |        |
|---|--------|--------|--------|
| H | 20.135 | 43.66  | 25.004 |
| H | 20.058 | 42.534 | 23.995 |
| O | 18.393 | 36.519 | 10.098 |
| H | 18.709 | 35.786 | 9.57   |
| H | 17.601 | 36.186 | 10.52  |
| O | 18.53  | 36.848 | 6.681  |
| H | 18.113 | 36.616 | 5.852  |
| H | 17.895 | 36.59  | 7.35   |
| O | 19.841 | 44.732 | 21.345 |
| H | 19.005 | 44.512 | 20.933 |
| H | 19.778 | 44.362 | 22.226 |
| O | 29.542 | 28.057 | 8.34   |
| H | 29.948 | 27.2   | 8.466  |
| H | 30.209 | 28.575 | 7.89   |
| O | 16.193 | 39.06  | 19.084 |
| H | 16.241 | 38.2   | 19.502 |
| H | 15.782 | 38.892 | 18.236 |
| O | 20.181 | 43.625 | 28.842 |
| H | 19.308 | 43.861 | 29.155 |
| H | 20.678 | 43.435 | 29.638 |
| O | 21.372 | 31.936 | 15.695 |
| H | 21.914 | 31.691 | 14.945 |
| H | 21.256 | 32.882 | 15.607 |
| O | 20.178 | 47.9   | 10.154 |
| H | 19.989 | 48.779 | 10.481 |
| H | 19.318 | 47.496 | 10.041 |
| O | 20.405 | 39.886 | 13.726 |
| H | 20.493 | 40.108 | 12.799 |
| H | 20.053 | 38.996 | 13.727 |
| O | 10.086 | 36.483 | 20.808 |
| H | 10.473 | 35.829 | 21.39  |
| H | 9.251  | 36.1   | 20.539 |
| O | 14.112 | 40.896 | 16.677 |
| H | 15.057 | 40.858 | 16.526 |
| H | 13.98  | 41.71  | 17.164 |
| O | 20.329 | 42.42  | 18.97  |
| H | 20.654 | 42.007 | 18.17  |
| H | 20.957 | 42.163 | 19.645 |
| O | 26.741 | 39.334 | 4.666  |
| H | 27.059 | 38.747 | 5.351  |
| H | 26.041 | 39.836 | 5.085  |
| O | 0.813  | 42.617 | 19.286 |
| H | 0.678  | 41.914 | 18.651 |
| H | 0.753  | 42.186 | 20.138 |
| O | 26.533 | 38.524 | 8.681  |
| H | 26.457 | 37.894 | 7.964  |
| H | 26.104 | 38.095 | 9.422  |

|   |        |        |        |
|---|--------|--------|--------|
| O | 10.34  | 37.94  | 28.593 |
| H | 10.297 | 37.065 | 28.208 |
| H | 9.631  | 38.424 | 28.169 |
| O | 15.42  | 33.003 | 17.538 |
| H | 15.928 | 33.037 | 18.348 |
| H | 14.8   | 33.728 | 17.612 |
| O | 14.324 | 33.152 | 12.33  |
| H | 13.399 | 33.095 | 12.091 |
| H | 14.33  | 33.084 | 13.284 |
| O | 16.5   | 37.203 | 13.235 |
| H | 16.442 | 38.08  | 13.615 |
| H | 17.216 | 36.782 | 13.71  |
| O | 18.648 | 23.019 | 12.993 |
| H | 19.41  | 23.143 | 12.428 |
| H | 17.915 | 23.37  | 12.488 |
| O | 11.334 | 32.528 | 15.954 |
| H | 11.794 | 33.106 | 16.562 |
| H | 10.413 | 32.775 | 16.038 |
| O | 29.104 | 42.92  | 15.135 |
| H | 29.152 | 42.352 | 15.904 |
| H | 28.442 | 43.573 | 15.362 |
| O | 12.363 | 34.781 | 25.75  |
| H | 13.073 | 34.747 | 26.391 |
| H | 11.618 | 35.133 | 26.236 |
| O | 15.213 | 40.387 | 34.542 |
| H | 14.903 | 39.595 | 34.981 |
| H | 15.027 | 40.236 | 33.616 |
| O | 16.006 | 50.453 | 24.867 |
| H | 16.445 | 51.28  | 25.067 |
| H | 15.209 | 50.712 | 24.404 |
| O | 14.24  | 23.951 | 26.201 |
| H | 14.601 | 24.797 | 26.463 |
| H | 13.957 | 23.547 | 27.022 |
| O | 13.704 | 46.773 | 30.325 |
| H | 13.164 | 46.596 | 31.095 |
| H | 13.258 | 47.495 | 29.881 |
| O | 21.676 | 41.9   | 21.447 |
| H | 21.511 | 41.478 | 22.29  |
| H | 22.441 | 42.455 | 21.602 |
| O | 20.584 | 46.94  | 26.461 |
| H | 20.618 | 47.596 | 25.765 |
| H | 19.75  | 47.102 | 26.902 |
| O | 26.657 | 45.928 | 30.133 |
| H | 27.438 | 45.454 | 30.419 |
| H | 25.926 | 45.409 | 30.467 |
| O | 10.173 | 42.717 | 20.42  |
| H | 9.886  | 43.523 | 20.848 |

|   |        |        |        |
|---|--------|--------|--------|
| H | 9.857  | 42.017 | 20.991 |
| O | 9.476  | 31.75  | 18.971 |
| H | 9.436  | 30.942 | 19.484 |
| H | 8.963  | 32.38  | 19.476 |
| O | 11.361 | 49.746 | 17.257 |
| H | 11.542 | 48.882 | 16.889 |
| H | 12.035 | 49.867 | 17.926 |
| O | 18.832 | 33.308 | 8.215  |
| H | 18.052 | 33.863 | 8.2    |
| H | 19.226 | 33.47  | 9.072  |
| O | 18.188 | 26.558 | 19.416 |
| H | 18.847 | 27.251 | 19.391 |
| H | 18.638 | 25.787 | 19.071 |
| O | 26.098 | 53.171 | 28.482 |
| H | 26.73  | 53.322 | 29.184 |
| H | 25.434 | 52.605 | 28.875 |
| O | 36.273 | 47.55  | 18.006 |
| H | 36.08  | 47.012 | 17.238 |
| H | 36.87  | 47.015 | 18.53  |
| O | 13.716 | 38.752 | 23.521 |
| H | 13.682 | 39.312 | 24.296 |
| H | 13.113 | 39.164 | 22.902 |
| O | 16.078 | 42.701 | 9.744  |
| H | 15.403 | 42.131 | 9.374  |
| H | 16.158 | 43.417 | 9.114  |
| O | 32.68  | 27.901 | 4.721  |
| H | 32.057 | 28.503 | 4.314  |
| H | 33.346 | 27.756 | 4.05   |
| O | 13.846 | 28.869 | -0.611 |
| H | 13.402 | 28.706 | 0.222  |
| H | 13.155 | 29.19  | -1.191 |
| O | 9.915  | 36.924 | -0.668 |
| H | 9.642  | 36.59  | -1.523 |
| H | 10.791 | 37.278 | -0.819 |
| O | 30.083 | 42.06  | 0.485  |
| H | 29.129 | 42.097 | 0.552  |
| H | 30.385 | 42.021 | 1.393  |
| O | 16.117 | 48.264 | 5.9    |
| H | 15.46  | 47.974 | 5.268  |
| H | 15.608 | 48.618 | 6.63   |
| O | 12.735 | 32.146 | 0.914  |
| H | 11.957 | 31.68  | 0.61   |
| H | 12.544 | 33.068 | 0.744  |
| O | 15.156 | 42.174 | -7.048 |
| H | 15.21  | 41.467 | -7.69  |
| H | 15.905 | 42.03  | -6.47  |
| O | 24.646 | 41.304 | 1.94   |

|   |        |        |        |
|---|--------|--------|--------|
| H | 24.476 | 41.901 | 2.669  |
| H | 24.305 | 41.762 | 1.171  |
| O | 19.16  | 31.739 | 4.677  |
| H | 19.03  | 30.808 | 4.494  |
| H | 20.096 | 31.82  | 4.857  |
| O | 17.855 | 30.629 | 1.627  |
| H | 17.231 | 30.066 | 2.087  |
| H | 17.648 | 30.509 | 0.701  |
| O | 15.826 | 35.315 | -1.129 |
| H | 15.726 | 35.58  | -0.215 |
| H | 16.244 | 36.066 | -1.552 |
| O | 18.421 | 34.171 | 13.328 |
| H | 17.464 | 34.16  | 13.354 |
| H | 18.688 | 33.908 | 14.208 |
| O | 22.8   | 33.462 | 7.375  |
| H | 22.722 | 33.327 | 8.32   |
| H | 22.191 | 34.175 | 7.184  |
| O | 21.123 | 25.253 | 9.317  |
| H | 20.873 | 25.746 | 10.098 |
| H | 21.26  | 25.921 | 8.645  |
| O | 16.641 | 42.76  | -3.105 |
| H | 17.488 | 42.8   | -3.549 |
| H | 16.852 | 42.863 | -2.177 |
| O | 25.261 | 34.194 | -0.31  |
| H | 24.739 | 34.996 | -0.324 |
| H | 25.839 | 34.299 | 0.446  |
| O | 15.727 | 26.934 | 4.595  |
| H | 15.633 | 27.866 | 4.398  |
| H | 16.594 | 26.86  | 4.994  |
| O | 15.796 | 36.547 | 1.234  |
| H | 15.026 | 36.777 | 1.754  |
| H | 16.521 | 36.998 | 1.668  |
| O | 29.603 | 44.972 | 0.43   |
| H | 29.669 | 44.049 | 0.184  |
| H | 30.503 | 45.296 | 0.387  |
| O | 26.935 | 34.717 | 9.699  |
| H | 27.543 | 34.343 | 9.062  |
| H | 27.386 | 35.49  | 10.037 |
| O | 20.19  | 30.844 | 7.671  |
| H | 20.144 | 31.757 | 7.955  |
| H | 20.734 | 30.866 | 6.883  |
| O | 31.607 | 48.788 | 8.428  |
| H | 31.029 | 49.35  | 8.944  |
| H | 31.939 | 49.359 | 7.734  |
| O | 27.468 | 34.791 | 1.073  |
| H | 27.494 | 35.603 | 0.566  |
| H | 28.369 | 34.668 | 1.373  |

|   |        |        |        |
|---|--------|--------|--------|
| O | 30.563 | 32.944 | 5.77   |
| H | 30.787 | 33.664 | 5.18   |
| H | 31.345 | 32.391 | 5.78   |
| O | 31.59  | 35.418 | 8.552  |
| H | 31.151 | 35.283 | 7.712  |
| H | 31.198 | 34.767 | 9.134  |
| O | 21.711 | 37.354 | 2.022  |
| H | 21.711 | 37.124 | 2.951  |
| H | 21.686 | 38.311 | 2.012  |
| O | 17.119 | 40.615 | 6.757  |
| H | 16.552 | 39.876 | 6.537  |
| H | 17.963 | 40.393 | 6.366  |
| O | 17.407 | 36.024 | 3.991  |
| H | 16.947 | 35.208 | 3.791  |
| H | 17.882 | 36.233 | 3.187  |
| O | 31.141 | 45.494 | 5.129  |
| H | 31.311 | 46.228 | 4.539  |
| H | 31.98  | 45.336 | 5.563  |
| O | 20.825 | 42.948 | 6.487  |
| H | 20.954 | 42.964 | 5.539  |
| H | 21.252 | 42.14  | 6.773  |
| O | 17.441 | 46.535 | 3.183  |
| H | 18.342 | 46.631 | 2.873  |
| H | 16.937 | 47.147 | 2.646  |
| O | 19.426 | 44.973 | 7.839  |
| H | 19.194 | 45.664 | 7.218  |
| H | 19.694 | 44.237 | 7.29   |
| O | 28.941 | 39.862 | 7.976  |
| H | 28.155 | 39.452 | 8.337  |
| H | 29.204 | 40.501 | 8.639  |
| O | 11.525 | 44.352 | -0.504 |
| H | 12.162 | 45.067 | -0.502 |
| H | 11.853 | 43.736 | 0.152  |
| O | 27.641 | 38.666 | 12.174 |
| H | 26.887 | 38.255 | 11.752 |
| H | 27.367 | 39.571 | 12.327 |
| O | 25.669 | 47.187 | 14.523 |
| H | 25.009 | 46.779 | 15.083 |
| H | 25.207 | 47.376 | 13.707 |
| O | 4.192  | 45.536 | 3.243  |
| H | 4.916  | 45.789 | 2.669  |
| H | 3.841  | 44.739 | 2.846  |
| O | 17.028 | 24.711 | -2.015 |
| H | 17.262 | 24.375 | -1.15  |
| H | 17.857 | 24.745 | -2.492 |
| O | 21.433 | 35.823 | 4.36   |
| H | 21.95  | 35.156 | 3.908  |



|   |        |        |        |
|---|--------|--------|--------|
| H | 20.925 | 35.334 | 5.008  |
| O | 23.488 | 27.465 | 12.648 |
| H | 24.372 | 27.216 | 12.92  |
| H | 23.319 | 28.288 | 13.107 |
| O | 20.467 | 43.554 | 10.039 |
| H | 20.181 | 44.102 | 9.308  |
| H | 21.273 | 43.142 | 9.728  |
| O | 22.462 | 39.352 | 4.139  |
| H | 22.537 | 38.928 | 4.994  |
| H | 23.274 | 39.125 | 3.686  |
| O | 22.198 | 39.934 | 7.515  |
| H | 22.162 | 39.927 | 8.472  |
| H | 22.626 | 39.109 | 7.285  |
| O | 21.288 | 35.366 | -0.853 |
| H | 21.615 | 34.479 | -0.997 |
| H | 21.987 | 35.804 | -0.368 |
| O | 17.858 | 32.621 | 15.928 |
| H | 18.602 | 32.75  | 16.515 |
| H | 17.09  | 32.783 | 16.476 |
| O | 18.289 | 27.305 | 2.067  |
| H | 17.516 | 27.528 | 1.549  |
| H | 18.177 | 27.788 | 2.885  |
| O | 21.857 | 31.364 | 5.368  |
| H | 22.228 | 30.534 | 5.668  |
| H | 22.355 | 32.032 | 5.838  |
| O | 20.395 | 40.542 | 10.916 |
| H | 19.675 | 40.137 | 10.434 |
| H | 20.466 | 41.422 | 10.546 |
| O | 10.283 | 31.548 | 0.241  |
| H | 9.582  | 31.578 | -0.411 |
| H | 9.941  | 30.983 | 0.934  |
| O | 26.324 | 31.615 | -0.026 |
| H | 27.166 | 31.817 | -0.436 |
| H | 25.756 | 32.344 | -0.276 |
| O | 36.044 | 30.927 | 10.212 |
| H | 35.623 | 31.224 | 11.018 |
| H | 35.323 | 30.82  | 9.591  |
| O | 7.93   | 38.914 | 11.453 |
| H | 7.469  | 39.676 | 11.101 |
| H | 8.816  | 39.231 | 11.63  |
| O | 25.256 | 36.907 | -2.619 |
| H | 25.034 | 37.216 | -1.741 |
| H | 24.447 | 37.008 | -3.12  |
| O | 11.224 | 39.656 | 2.134  |
| H | 11.025 | 39.981 | 3.012  |
| H | 10.476 | 39.93  | 1.602  |
| O | 38.982 | 40.165 | 1.711  |

|   |        |        |        |
|---|--------|--------|--------|
| H | 39.789 | 40.133 | 1.198  |
| H | 38.286 | 39.994 | 1.076  |
| O | 16.858 | 40.541 | 11.725 |
| H | 17.103 | 41.398 | 11.377 |
| H | 17.558 | 39.956 | 11.437 |
| O | 16.185 | 35.141 | -4.987 |
| H | 15.331 | 35.525 | -4.789 |
| H | 16.115 | 34.234 | -4.687 |
| O | 15.952 | 35.251 | 11.137 |
| H | 15.36  | 34.537 | 11.371 |
| H | 16.059 | 35.749 | 11.948 |
| O | 20.023 | 33.523 | 10.906 |
| H | 20.131 | 32.578 | 11.009 |
| H | 19.667 | 33.816 | 11.745 |
| O | 24.029 | 46.095 | 23.541 |
| H | 24.648 | 46.801 | 23.351 |
| H | 23.168 | 46.487 | 23.397 |
| O | 28.546 | 41.879 | 5.964  |
| H | 29.441 | 41.641 | 5.72   |
| H | 28.289 | 41.22  | 6.608  |
| O | 21.965 | 45.793 | -1.562 |
| H | 21.379 | 46.487 | -1.862 |
| H | 21.659 | 45.008 | -2.017 |
| O | 31.775 | 46.452 | 9.671  |
| H | 31.175 | 46.848 | 10.304 |
| H | 31.903 | 47.128 | 9.006  |
| O | 21.099 | 41.072 | 2.721  |
| H | 21.518 | 40.298 | 3.097  |
| H | 21.569 | 41.811 | 3.107  |
| O | 25.841 | 47.086 | 9.551  |
| H | 26.568 | 46.768 | 9.016  |
| H | 26.261 | 47.557 | 10.27  |
| O | 9.173  | 27.48  | 7.795  |
| H | 9.374  | 28.035 | 7.041  |
| H | 9.946  | 26.924 | 7.896  |
| O | 14.37  | 36.752 | 6.001  |
| H | 14.74  | 35.87  | 6.022  |
| H | 13.49  | 36.636 | 5.644  |
| O | 22.773 | 42.309 | 9.381  |
| H | 23.223 | 43.127 | 9.589  |
| H | 23.477 | 41.666 | 9.285  |
| O | 20.497 | 30.637 | 10.918 |
| H | 20.588 | 29.799 | 11.373 |
| H | 19.917 | 30.447 | 10.181 |
| O | 22.445 | 37.565 | 6.164  |
| H | 22.506 | 36.84  | 6.785  |
| H | 22.086 | 37.171 | 5.369  |

|   |        |        |        |
|---|--------|--------|--------|
| O | 30.368 | 32.817 | 11.638 |
| H | 30.034 | 33.693 | 11.444 |
| H | 29.709 | 32.224 | 11.275 |
| O | 25.71  | 44.493 | -0.336 |
| H | 26.405 | 45.129 | -0.502 |
| H | 25.174 | 44.897 | 0.347  |
| O | 27.204 | 41.375 | 0.353  |
| H | 26.782 | 42.054 | 0.88   |
| H | 26.534 | 41.111 | -0.278 |
| O | 13.554 | 50.905 | 4.279  |
| H | 13.864 | 51.62  | 4.834  |
| H | 13.683 | 50.118 | 4.809  |
| O | 14.163 | 43.641 | 17.65  |
| H | 14.604 | 43.882 | 16.835 |
| H | 14.467 | 44.286 | 18.287 |
| O | 26.072 | 43.071 | 8.281  |
| H | 25.921 | 43.674 | 9.009  |
| H | 25.878 | 43.587 | 7.499  |
| O | 22.427 | 46.527 | 9.625  |
| H | 21.675 | 47.057 | 9.891  |
| H | 22.341 | 46.448 | 8.675  |
| O | 16.66  | 34.803 | 8.41   |
| H | 15.881 | 34.756 | 7.855  |
| H | 16.318 | 34.982 | 9.286  |
| O | 26.313 | 35.417 | 3.824  |
| H | 26.944 | 34.712 | 3.969  |
| H | 26.476 | 35.702 | 2.925  |
| O | 33.427 | 44.584 | 8.488  |
| H | 32.778 | 45.27  | 8.644  |
| H | 33.308 | 43.972 | 9.215  |
| O | 14.451 | 40.814 | 8.241  |
| H | 15.296 | 40.373 | 8.153  |
| H | 14.523 | 41.585 | 7.678  |
| O | 14.574 | 38.694 | 10.639 |
| H | 15.21  | 38.595 | 11.347 |
| H | 14.166 | 39.545 | 10.8   |
| O | 25.648 | 45.502 | 6.47   |
| H | 26.548 | 45.591 | 6.156  |
| H | 25.343 | 46.403 | 6.581  |
| O | 20.946 | 40.737 | 16.776 |
| H | 21.271 | 40.758 | 15.876 |
| H | 20.383 | 39.964 | 16.809 |
| O | 14.972 | 24.515 | 7.325  |
| H | 14.418 | 25.033 | 7.909  |
| H | 15.855 | 24.856 | 7.468  |
| O | 26.128 | 36.931 | 6.129  |
| H | 25.295 | 36.719 | 6.55   |

|   |        |        |        |
|---|--------|--------|--------|
| H | 26.108 | 36.451 | 5.302  |
| O | 14.775 | 40.594 | 1.187  |
| H | 14.836 | 40.677 | 2.138  |
| H | 15.502 | 41.119 | 0.853  |
| O | 24.983 | 40.5   | 9.138  |
| H | 25.624 | 39.809 | 9.304  |
| H | 25.501 | 41.232 | 8.804  |
| O | 30.295 | 42.127 | -2.385 |
| H | 29.789 | 42.937 | -2.452 |
| H | 30.082 | 41.783 | -1.517 |
| O | 23.397 | 44.813 | 1.898  |
| H | 23.4   | 45.745 | 2.115  |
| H | 22.578 | 44.681 | 1.421  |
| O | 25.251 | 37.859 | 11.174 |
| H | 24.416 | 38.249 | 10.917 |
| H | 25.011 | 37.159 | 11.781 |
| O | 25.254 | 32.606 | 6.335  |
| H | 25.869 | 33.338 | 6.298  |
| H | 24.474 | 32.97  | 6.754  |
| O | 24.145 | 49.113 | 9.536  |
| H | 24.796 | 48.429 | 9.378  |
| H | 23.527 | 49.027 | 8.81   |
| O | 19.303 | 37.561 | -0.913 |
| H | 19.985 | 36.898 | -0.806 |
| H | 18.848 | 37.309 | -1.716 |
| O | 10.749 | 47.5   | -1.261 |
| H | 10.012 | 48.072 | -1.475 |
| H | 10.398 | 46.892 | -0.61  |
| O | 23.385 | 48.922 | 6.78   |
| H | 23.077 | 49.809 | 6.599  |
| H | 22.687 | 48.354 | 6.454  |
| O | 8.99   | 34.461 | 0.289  |
| H | 9.318  | 35.318 | 0.017  |
| H | 9.63   | 33.839 | -0.058 |
| O | 29.999 | 41.657 | -7.552 |
| H | 29.307 | 41.088 | -7.215 |
| H | 29.934 | 41.576 | -8.504 |
| O | 27.505 | 33.696 | -2.201 |
| H | 28.368 | 33.948 | -1.872 |
| H | 27.017 | 34.517 | -2.248 |
| O | 18.705 | 40.22  | -1.878 |
| H | 19.202 | 39.457 | -1.584 |
| H | 18.629 | 40.77  | -1.098 |
| O | 24.284 | 35.111 | 12.065 |
| H | 24.292 | 34.416 | 11.407 |
| H | 23.722 | 34.774 | 12.763 |
| O | 11.017 | 30.666 | 4.53   |

|   |        |        |        |
|---|--------|--------|--------|
| H | 11.53  | 30.273 | 3.824  |
| H | 11.258 | 31.593 | 4.513  |
| O | 33.013 | 32.126 | 12.743 |
| H | 32.212 | 32.084 | 12.222 |
| H | 33.355 | 33.006 | 12.586 |
| O | 23.76  | 39.36  | -1.954 |
| H | 24.469 | 39.83  | -2.393 |
| H | 23.475 | 39.954 | -1.259 |
| O | 21.249 | 35.996 | 11.703 |
| H | 21.809 | 35.576 | 12.356 |
| H | 20.828 | 35.268 | 11.245 |
| O | 22.208 | 36.266 | 9.082  |
| H | 22.106 | 35.895 | 9.959  |
| H | 22.832 | 36.982 | 9.195  |
| O | 30.066 | 35.727 | -3.372 |
| H | 29.882 | 35.353 | -4.234 |
| H | 29.205 | 35.939 | -3.013 |
| O | 24.507 | 22.994 | 0.595  |
| H | 23.635 | 23.388 | 0.615  |
| H | 24.743 | 22.887 | 1.517  |
| O | 19.638 | 27.386 | -1.643 |
| H | 20.237 | 27.057 | -2.314 |
| H | 19.244 | 26.6   | -1.267 |
| O | 19.684 | 37.433 | 13.68  |
| H | 20.049 | 36.688 | 13.202 |
| H | 19.515 | 37.094 | 14.559 |
| O | 19.619 | 39.493 | 6.287  |
| H | 20.489 | 39.623 | 6.664  |
| H | 19.426 | 38.568 | 6.443  |
| O | 18.246 | 28.722 | 7.712  |
| H | 18.829 | 29.47  | 7.838  |
| H | 17.827 | 28.598 | 8.564  |
| O | 17.726 | 27.12  | 9.956  |
| H | 17.601 | 26.26  | 9.556  |
| H | 18.417 | 26.985 | 10.604 |
| O | 38.113 | 47.627 | 6.456  |
| H | 37.599 | 48.078 | 7.126  |
| H | 38.665 | 47.018 | 6.948  |
| O | 20.359 | 34.659 | 6.425  |
| H | 19.673 | 34.099 | 6.791  |
| H | 20.214 | 35.513 | 6.833  |
| O | 15.272 | 42.603 | 6.551  |
| H | 16.095 | 42.142 | 6.713  |
| H | 15.525 | 43.523 | 6.471  |
| O | 18.894 | 37.013 | 1.829  |
| H | 19.787 | 36.7   | 1.974  |
| H | 18.911 | 37.384 | 0.947  |

|   |        |        |        |
|---|--------|--------|--------|
| O | 30.997 | 38.633 | 10.347 |
| H | 30.511 | 39.415 | 10.607 |
| H | 31.505 | 38.908 | 9.583  |
| O | 22.038 | 54.625 | 4.435  |
| H | 21.26  | 55.091 | 4.131  |
| H | 22.694 | 55.311 | 4.562  |
| O | 12.34  | 43.619 | 7.757  |
| H | 12.362 | 43.581 | 8.713  |
| H | 13.119 | 43.136 | 7.479  |
| O | 16.265 | 42.424 | -0.079 |
| H | 15.662 | 43.05  | 0.32   |
| H | 17.114 | 42.867 | -0.066 |
| O | 16.306 | 47.745 | 11.787 |
| H | 16.327 | 47.583 | 10.844 |
| H | 16.969 | 47.155 | 12.147 |
| O | 30.213 | 34.154 | 1.502  |
| H | 30.471 | 35.071 | 1.414  |
| H | 30.57  | 33.728 | 0.723  |
| O | 22.156 | 32.727 | -1.073 |
| H | 21.995 | 32.171 | -0.311 |
| H | 22.045 | 32.142 | -1.823 |
| O | 29.899 | 31.17  | 2.3    |
| H | 29.774 | 31.795 | 1.585  |
| H | 30.818 | 30.912 | 2.233  |
| O | 29.694 | 32.232 | -3.402 |
| H | 28.771 | 32.078 | -3.205 |
| H | 29.702 | 33.063 | -3.878 |
| O | 12.845 | 46.055 | 9.705  |
| H | 12.043 | 46.528 | 9.483  |
| H | 12.542 | 45.265 | 10.151 |
| O | 10.228 | 36.379 | 16.985 |
| H | 9.553  | 36.908 | 16.56  |
| H | 11.053 | 36.789 | 16.725 |
| O | 16.766 | 29.317 | 11.534 |
| H | 16.177 | 29.89  | 11.043 |
| H | 17.006 | 28.631 | 10.911 |
| O | 28.346 | 44.595 | 5.134  |
| H | 29.285 | 44.731 | 5.257  |
| H | 28.169 | 43.752 | 5.553  |
| O | 22.677 | 20.481 | 52.269 |
| H | 23.125 | 20.728 | 53.078 |
| H | 23.117 | 20.989 | 51.587 |
| O | 23.415 | 21.306 | 57.949 |
| H | 22.917 | 20.693 | 58.489 |
| H | 23.575 | 22.056 | 58.523 |
| O | 9.915  | 19.591 | 55.813 |
| H | 9.272  | 20.172 | 56.218 |

|   |        |        |        |
|---|--------|--------|--------|
| H | 10.726 | 19.76  | 56.292 |
| O | 22.155 | 24.034 | 60.258 |
| H | 22.007 | 24.969 | 60.119 |
| H | 21.484 | 23.777 | 60.889 |
| O | 11.981 | 25.624 | 61.262 |
| H | 12.008 | 24.719 | 61.573 |
| H | 12.895 | 25.842 | 61.081 |
| O | 16.154 | 18.908 | 55.233 |
| H | 15.255 | 18.964 | 54.909 |
| H | 16.274 | 19.708 | 55.746 |
| O | 14.486 | 17.054 | 56.943 |
| H | 14.503 | 17.003 | 55.988 |
| H | 14.822 | 17.928 | 57.143 |
| O | 18.17  | 31.408 | 56.383 |
| H | 18.631 | 30.725 | 55.897 |
| H | 17.446 | 30.951 | 56.811 |
| O | 23.6   | 24.95  | 56.021 |
| H | 23.542 | 25.693 | 55.42  |
| H | 23.939 | 25.325 | 56.834 |
| O | 17.857 | 17.735 | 57.119 |
| H | 17.224 | 18.042 | 56.469 |
| H | 18.228 | 16.941 | 56.735 |
| O | 10.72  | 15.203 | 54.802 |
| H | 10.235 | 15.055 | 55.613 |
| H | 11.564 | 14.774 | 54.944 |
| O | 27.453 | 16.348 | 62.438 |
| H | 28.346 | 16.562 | 62.168 |
| H | 27.03  | 16.035 | 61.638 |
| O | 9.542  | 15.365 | 57.387 |
| H | 10     | 16.024 | 57.909 |
| H | 9.293  | 14.69  | 58.019 |
| O | 11.879 | 15.244 | 61.175 |
| H | 12.461 | 15.893 | 60.78  |
| H | 12.141 | 14.414 | 60.777 |
| O | 23.715 | 16.793 | 57.867 |
| H | 23.995 | 17.175 | 58.699 |
| H | 23.501 | 17.546 | 57.317 |
| O | 21.269 | 18.138 | 61.326 |
| H | 21.321 | 17.186 | 61.405 |
| H | 21.303 | 18.456 | 62.228 |
| O | 10.769 | 22.897 | 50.877 |
| H | 10.497 | 22.351 | 50.139 |
| H | 11.283 | 23.599 | 50.478 |
| O | 28.26  | 17.864 | 53.876 |
| H | 27.595 | 18.265 | 54.435 |
| H | 28.15  | 16.923 | 54.009 |
| O | 25.362 | 10.136 | 52.952 |

|   |        |        |        |
|---|--------|--------|--------|
| H | 25.237 | 10.936 | 53.463 |
| H | 26.307 | 9.984  | 52.973 |
| O | 20.584 | 21.557 | 49.455 |
| H | 21.482 | 21.881 | 49.393 |
| H | 20.357 | 21.306 | 48.559 |
| O | 20.75  | 31.992 | 55.034 |
| H | 20.603 | 32.789 | 55.543 |
| H | 20.369 | 32.181 | 54.177 |
| O | 29.87  | 23.702 | 51.287 |
| H | 29.128 | 23.966 | 50.741 |
| H | 30.097 | 22.826 | 50.975 |
| O | 21.249 | 28.368 | 53.175 |
| H | 21.268 | 29.036 | 52.49  |
| H | 21.708 | 28.769 | 53.914 |
| O | 22.841 | 18.806 | 55.844 |
| H | 22.535 | 19.688 | 55.633 |
| H | 22.057 | 18.346 | 56.145 |
| O | 26.444 | 20.275 | 51.916 |
| H | 25.997 | 19.683 | 52.522 |
| H | 26.922 | 19.696 | 51.324 |
| O | 18.99  | 21.657 | 60.619 |
| H | 19.818 | 21.369 | 60.233 |
| H | 18.368 | 20.966 | 60.394 |
| O | 25.293 | 24.011 | 54.069 |
| H | 25.918 | 24.734 | 54.014 |
| H | 24.834 | 24.153 | 54.897 |
| O | 25.109 | 17.042 | 51.963 |
| H | 24.842 | 16.252 | 51.494 |
| H | 26.051 | 16.935 | 52.096 |
| O | 25.711 | 19.771 | 57.571 |
| H | 26.216 | 20.355 | 57.006 |
| H | 24.867 | 20.211 | 57.678 |
| O | 23.792 | 9.133  | 56.604 |
| H | 23.566 | 8.203  | 56.601 |
| H | 23.001 | 9.571  | 56.92  |
| O | 6.328  | 21.508 | 51.869 |
| H | 6.293  | 20.988 | 51.066 |
| H | 5.606  | 21.174 | 52.402 |
| O | 14.664 | 18.924 | 64.054 |
| H | 13.817 | 18.743 | 64.462 |
| H | 14.904 | 19.792 | 64.376 |
| O | 15.835 | 27.906 | 51.088 |
| H | 14.92  | 28.11  | 51.279 |
| H | 15.856 | 26.952 | 51.013 |
| O | 26.746 | 25.21  | 48.87  |
| H | 26.448 | 25.447 | 47.991 |
| H | 25.939 | 25.08  | 49.369 |



|   |        |        |        |
|---|--------|--------|--------|
| O | 18.697 | 32.943 | 59.138 |
| H | 18.448 | 32.188 | 59.671 |
| H | 17.876 | 33.413 | 58.991 |
| O | 24.511 | 24.946 | 50.444 |
| H | 23.785 | 25.476 | 50.77  |
| H | 24.631 | 24.268 | 51.11  |
| O | 21.104 | 33.495 | 51.204 |
| H | 20.506 | 33.087 | 51.83  |
| H | 21.325 | 34.338 | 51.598 |
| O | 18.897 | 10.973 | 53.283 |
| H | 19.175 | 11.653 | 52.669 |
| H | 19.67  | 10.809 | 53.824 |
| O | 24.202 | 15.302 | 49.444 |
| H | 25.102 | 15.623 | 49.38  |
| H | 24.078 | 14.775 | 48.655 |
| O | 22.89  | 10.676 | 60.231 |
| H | 23.275 | 9.8    | 60.247 |
| H | 22.107 | 10.584 | 59.688 |
| O | 18.872 | 16.787 | 64.849 |
| H | 19.494 | 17.467 | 65.11  |
| H | 18.368 | 16.606 | 65.642 |
| O | 27.075 | 13.009 | 47.597 |
| H | 27.124 | 12.29  | 48.228 |
| H | 27.052 | 13.799 | 48.135 |
| O | 25.199 | 22.568 | 62.491 |
| H | 26.081 | 22.2   | 62.426 |
| H | 25.029 | 22.616 | 63.432 |
| O | 12.05  | 11.006 | 50.472 |
| H | 12.459 | 10.14  | 50.484 |
| H | 12.756 | 11.607 | 50.71  |
| O | 16.494 | 17.376 | 37.419 |
| H | 16.652 | 16.849 | 36.636 |
| H | 17.362 | 17.685 | 37.679 |
| O | 22.622 | 13.965 | 55.879 |
| H | 22.717 | 13.459 | 56.686 |
| H | 22.077 | 14.712 | 56.126 |
| O | 17.677 | 10.397 | 62.358 |
| H | 16.838 | 10.288 | 61.91  |
| H | 17.473 | 10.935 | 63.122 |
| O | 21.174 | 15.439 | 57.968 |
| H | 20.715 | 14.721 | 58.404 |
| H | 21.867 | 15.687 | 58.58  |
| O | 19.771 | 21.129 | 46.829 |
| H | 18.984 | 21.575 | 46.514 |
| H | 20.459 | 21.401 | 46.221 |
| O | 30.666 | 8.042  | 53.277 |
| H | 31.099 | 7.958  | 52.428 |

|   |        |        |        |
|---|--------|--------|--------|
| H | 29.745 | 8.189  | 53.063 |
| O | 15.795 | 25.204 | 51.2   |
| H | 15.948 | 24.803 | 52.056 |
| H | 16     | 24.511 | 50.572 |
| O | 15.005 | 12.964 | 60.137 |
| H | 15.953 | 13.017 | 60.261 |
| H | 14.848 | 13.403 | 59.301 |
| O | 15.052 | 22.946 | 56.851 |
| H | 15.617 | 22.198 | 56.656 |
| H | 15.651 | 23.623 | 57.164 |
| O | 38.617 | 23.952 | 56.452 |
| H | 39.167 | 23.614 | 55.746 |
| H | 37.834 | 24.28  | 56.01  |
| O | 13.92  | 18.4   | 54.064 |
| H | 13.011 | 18.105 | 54.109 |
| H | 14.122 | 18.413 | 53.129 |
| O | 14.853 | 22.701 | 47.56  |
| H | 13.974 | 22.98  | 47.305 |
| H | 14.787 | 22.53  | 48.499 |
| O | 14.411 | 19.83  | 58.439 |
| H | 14.65  | 19.949 | 59.358 |
| H | 13.75  | 19.138 | 58.451 |
| O | 13.746 | 19.018 | 50.885 |
| H | 14.669 | 19.27  | 50.923 |
| H | 13.286 | 19.724 | 51.34  |
| O | 29.782 | 16.458 | 47.448 |
| H | 29.568 | 16.833 | 46.594 |
| H | 29.747 | 15.512 | 47.31  |
| O | 30.211 | 21.049 | 50.585 |
| H | 29.598 | 20.342 | 50.791 |
| H | 30.369 | 20.962 | 49.645 |
| O | 29.464 | 23.002 | 61.595 |
| H | 29.356 | 23.931 | 61.799 |
| H | 29.808 | 22.991 | 60.703 |
| O | 13.765 | 16.43  | 59.677 |
| H | 13.741 | 16.416 | 58.721 |
| H | 14.684 | 16.275 | 59.896 |
| O | -1.325 | 25.605 | 49.553 |
| H | -2.028 | 25.259 | 49.003 |
| H | -1.529 | 26.536 | 49.643 |
| O | 11.686 | 25.664 | 57.426 |
| H | 11.466 | 25.027 | 58.106 |
| H | 10.842 | 26.023 | 57.153 |
| O | 15.471 | 14.343 | 57.867 |
| H | 15.654 | 14.214 | 56.937 |
| H | 15.455 | 15.294 | 57.978 |
| O | 23.837 | 29.24  | 56.52  |

|   |        |        |        |
|---|--------|--------|--------|
| H | 24.24  | 29.546 | 57.332 |
| H | 22.898 | 29.361 | 56.657 |
| O | 22.414 | 17.551 | 51.46  |
| H | 23.202 | 17.218 | 51.889 |
| H | 22.53  | 18.501 | 51.447 |
| O | 12.529 | 25.28  | 53.213 |
| H | 12.751 | 26.141 | 53.569 |
| H | 13.299 | 24.741 | 53.394 |
| O | 23.271 | 26.796 | 44.392 |
| H | 22.423 | 27.234 | 44.324 |
| H | 23.913 | 27.499 | 44.294 |
| O | 15.444 | 32.505 | 54.595 |
| H | 15.242 | 32.768 | 55.492 |
| H | 16.223 | 31.956 | 54.676 |
| O | 16.324 | 19.853 | 51.19  |
| H | 17.066 | 20.444 | 51.061 |
| H | 16.649 | 19.189 | 51.798 |
| O | 26.871 | 14.399 | 53.081 |
| H | 26.113 | 13.988 | 53.495 |
| H | 27.368 | 14.774 | 53.808 |
| O | 21.127 | 26.571 | 55.483 |
| H | 21.084 | 26.727 | 54.539 |
| H | 22.061 | 26.6   | 55.688 |
| O | 14.53  | 23.929 | 54.283 |
| H | 15.403 | 24.096 | 53.927 |
| H | 14.686 | 23.688 | 55.196 |
| O | 17.772 | 15.646 | 50.724 |
| H | 17.591 | 16.166 | 51.507 |
| H | 18.72  | 15.715 | 50.605 |
| O | 23.337 | 21.586 | 54.882 |
| H | 23.441 | 21.412 | 55.817 |
| H | 23.813 | 22.404 | 54.736 |
| O | 13.608 | 14.165 | 48.218 |
| H | 13.574 | 15.051 | 47.857 |
| H | 14.417 | 14.145 | 48.728 |
| O | 28.027 | 24.404 | 56.52  |
| H | 28.805 | 24.781 | 56.931 |
| H | 27.792 | 25.028 | 55.834 |
| O | 16.45  | 26.148 | 47     |
| H | 17.292 | 26.009 | 47.433 |
| H | 16.5   | 27.042 | 46.661 |
| O | 20.015 | 20.408 | 53.307 |
| H | 19.971 | 19.522 | 53.668 |
| H | 20.819 | 20.417 | 52.789 |
| O | 29.712 | 32.198 | 51.134 |
| H | 30.032 | 31.634 | 50.431 |
| H | 28.946 | 31.74  | 51.48  |

|   |        |        |        |
|---|--------|--------|--------|
| O | 12.819 | 23.287 | 59.354 |
| H | 13.217 | 23.938 | 59.932 |
| H | 13.305 | 23.367 | 58.533 |
| O | 14.148 | 34.908 | 46.589 |
| H | 14.909 | 34.746 | 47.147 |
| H | 13.404 | 34.592 | 47.101 |
| O | 18.782 | 30.765 | 47.837 |
| H | 19.669 | 30.738 | 48.194 |
| H | 18.226 | 30.459 | 48.553 |
| O | 30.269 | 26.882 | 52.582 |
| H | 30.88  | 26.158 | 52.441 |
| H | 30.752 | 27.66  | 52.303 |
| O | 23.414 | 22.434 | 48.858 |
| H | 23.307 | 23.061 | 49.573 |
| H | 23.888 | 22.919 | 48.182 |
| O | 25.06  | 22.513 | 51.844 |
| H | 25.606 | 21.731 | 51.916 |
| H | 25.298 | 23.043 | 52.604 |
| O | 18.036 | 16.743 | 47.361 |
| H | 18.231 | 16.622 | 46.432 |
| H | 18.369 | 17.618 | 47.563 |
| O | 20.59  | 15.411 | 50.735 |
| H | 20.6   | 15.402 | 49.778 |
| H | 21.218 | 16.093 | 50.975 |
| O | 20.235 | 12.514 | 47.721 |
| H | 20.338 | 13.421 | 48.008 |
| H | 20.145 | 12.573 | 46.769 |
| O | 25.966 | 21.584 | 49.138 |
| H | 25.023 | 21.656 | 48.991 |
| H | 26.084 | 21.827 | 50.056 |
| O | 17.657 | 13.087 | 43.238 |
| H | 17.212 | 12.723 | 42.472 |
| H | 16.997 | 13.638 | 43.659 |
| O | 17.578 | 17.755 | 53.013 |
| H | 17.06  | 18     | 53.78  |
| H | 18.487 | 17.839 | 53.301 |
| O | 30.549 | 22.696 | 58.832 |
| H | 30.671 | 23.121 | 57.983 |
| H | 30.303 | 21.796 | 58.616 |
| O | 18.46  | 27.823 | 44.292 |
| H | 19.337 | 27.623 | 44.619 |
| H | 17.962 | 28.067 | 45.073 |
| O | 11.709 | 20.345 | 57.734 |
| H | 12.582 | 20.281 | 58.121 |
| H | 11.132 | 20.538 | 58.473 |
| O | 30.228 | 27.544 | 56.891 |
| H | 30.932 | 27.157 | 56.37  |

|   |        |        |        |
|---|--------|--------|--------|
| H | 29.424 | 27.209 | 56.495 |
| O | 28.921 | 23.697 | 47.654 |
| H | 28.41  | 24.151 | 48.324 |
| H | 28.351 | 22.987 | 47.359 |
| O | 14.926 | 25.297 | 58.864 |
| H | 15.716 | 25.243 | 58.325 |
| H | 14.241 | 25.576 | 58.258 |
| O | 32.857 | 21.175 | 48.701 |
| H | 32.48  | 20.321 | 48.49  |
| H | 32.363 | 21.794 | 48.164 |
| O | 30.072 | 20.259 | 47.93  |
| H | 30.402 | 20.603 | 47.099 |
| H | 30.638 | 19.511 | 48.12  |
| O | 26.703 | 13.59  | 44.947 |
| H | 26.774 | 13.346 | 45.87  |
| H | 26     | 13.037 | 44.607 |
| O | 27.683 | 21.32  | 47.166 |
| H | 28.325 | 20.739 | 47.575 |
| H | 27.002 | 21.43  | 47.83  |
| O | 12.461 | 21.14  | 52.431 |
| H | 12.425 | 21.154 | 53.387 |
| H | 11.638 | 21.542 | 52.153 |
| O | 34.24  | 24.867 | 54.61  |
| H | 34.207 | 23.945 | 54.357 |
| H | 35.169 | 25.04  | 54.764 |
| O | 12.051 | 21.542 | 46.122 |
| H | 12.084 | 21.454 | 45.169 |
| H | 12.159 | 22.48  | 46.28  |
| O | 12.883 | 8.993  | 45.938 |
| H | 12.039 | 9.137  | 45.509 |
| H | 13.052 | 8.058  | 45.826 |
| O | 26.464 | 15.649 | 59.692 |
| H | 26.377 | 15.301 | 58.805 |
| H | 25.565 | 15.831 | 59.967 |
| O | 17.009 | 5.736  | 46.739 |
| H | 16.634 | 6.3    | 46.063 |
| H | 16.649 | 4.868  | 46.554 |
| O | 28.518 | 18.436 | 51.299 |
| H | 28.702 | 18.235 | 52.217 |
| H | 29.291 | 18.125 | 50.827 |
| O | 33.449 | 8.218  | 51.242 |
| H | 33.935 | 7.685  | 51.871 |
| H | 33.801 | 9.101  | 51.354 |
| O | 33.435 | 8.528  | 60.487 |
| H | 34.389 | 8.592  | 60.444 |
| H | 33.121 | 9.308  | 60.031 |
| O | 27.409 | 26.238 | 54.404 |

|   |        |        |        |
|---|--------|--------|--------|
| H | 26.864 | 27.021 | 54.483 |
| H | 27.986 | 26.422 | 53.663 |
| O | 30.562 | 26.16  | 61.275 |
| H | 30.147 | 26.087 | 60.415 |
| H | 30.579 | 27.1   | 61.454 |
| O | 20.244 | 21.705 | 55.604 |
| H | 21.146 | 22.019 | 55.663 |
| H | 20.215 | 21.212 | 54.784 |
| O | 18.32  | 36.54  | 55.961 |
| H | 18.443 | 35.591 | 55.986 |
| H | 17.38  | 36.663 | 56.097 |
| O | 25.003 | 15.011 | 62.073 |
| H | 24.926 | 15.2   | 63.008 |
| H | 25.855 | 14.583 | 61.984 |
| O | 18.885 | 5.462  | 63.95  |
| H | 19.365 | 5.568  | 64.772 |
| H | 19.463 | 5.836  | 63.285 |
| O | 26.995 | 18.598 | 60.243 |
| H | 27.477 | 17.771 | 60.261 |
| H | 26.631 | 18.644 | 59.359 |
| O | 18.641 | 26.858 | 52.776 |
| H | 19.571 | 27.009 | 52.61  |
| H | 18.317 | 26.454 | 51.971 |
| O | 16.862 | 10.965 | 55.03  |
| H | 17.705 | 11.075 | 54.59  |
| H | 16.33  | 10.468 | 54.409 |
| O | 16.391 | 13.836 | 54.079 |
| H | 16.841 | 14.435 | 54.675 |
| H | 17.035 | 13.152 | 53.896 |
| O | 25.554 | 11.249 | 57.121 |
| H | 25.048 | 10.465 | 56.91  |
| H | 24.907 | 11.955 | 57.138 |
| O | 30.972 | 14.002 | 54.473 |
| H | 31.838 | 14.403 | 54.553 |
| H | 31.002 | 13.25  | 55.064 |
| O | 19.098 | 24.4   | 51.224 |
| H | 18.953 | 23.465 | 51.075 |
| H | 19.96  | 24.572 | 50.845 |
| O | 20.356 | 15.027 | 47.977 |
| H | 19.611 | 15.495 | 47.599 |
| H | 21.11  | 15.588 | 47.792 |
| O | 20.18  | 17.914 | 53.851 |
| H | 20.692 | 17.797 | 53.051 |
| H | 20.481 | 17.216 | 54.432 |
| O | 24.835 | 31.352 | 51.238 |
| H | 25.73  | 31.127 | 51.491 |
| H | 24.891 | 31.542 | 50.302 |

|   |        |        |        |
|---|--------|--------|--------|
| O | 24.829 | 28.594 | 52.528 |
| H | 24.57  | 29.32  | 51.961 |
| H | 25.77  | 28.713 | 52.654 |
| O | 9.112  | 26.364 | 60.318 |
| H | 9.719  | 25.781 | 60.774 |
| H | 8.263  | 26.192 | 60.724 |
| O | 14.633 | 23.059 | 43.413 |
| H | 14.75  | 23.746 | 44.07  |
| H | 15.504 | 22.677 | 43.308 |
| O | 17.949 | 31.558 | 40.545 |
| H | 17.024 | 31.344 | 40.42  |
| H | 18.183 | 31.136 | 41.371 |
| O | 14.814 | 18.531 | 33.597 |
| H | 13.933 | 18.159 | 33.556 |
| H | 15.303 | 17.928 | 34.157 |
| O | 7.976  | 21.993 | 47.597 |
| H | 7.949  | 22.949 | 47.562 |
| H | 8.553  | 21.796 | 48.334 |
| O | 17.518 | 12.062 | 47.332 |
| H | 17.518 | 11.164 | 46.998 |
| H | 18.444 | 12.285 | 47.418 |
| O | 11.92  | 10.169 | 35.354 |
| H | 12.516 | 10.128 | 36.102 |
| H | 11.391 | 10.951 | 35.511 |
| O | 27.461 | 15.982 | 35.297 |
| H | 28.051 | 16.47  | 35.871 |
| H | 27.024 | 15.358 | 35.877 |
| O | 12.534 | 24.932 | 40.548 |
| H | 11.91  | 25.651 | 40.456 |
| H | 11.994 | 24.142 | 40.527 |
| O | 15.106 | 19.904 | 37.24  |
| H | 14.75  | 20.05  | 38.116 |
| H | 15.351 | 18.978 | 37.232 |
| O | 15.562 | 12.957 | 41.35  |
| H | 15.48  | 12.899 | 40.398 |
| H | 14.699 | 12.707 | 41.68  |
| O | 21.552 | 18.324 | 42.462 |
| H | 20.835 | 17.995 | 41.919 |
| H | 22.236 | 18.561 | 41.836 |
| O | 9.835  | 17.758 | 41.478 |
| H | 10.345 | 17.959 | 42.263 |
| H | 9.334  | 18.555 | 41.307 |
| O | 22.348 | 16.989 | 47.767 |
| H | 22.938 | 16.679 | 48.454 |
| H | 22.93  | 17.343 | 47.094 |
| O | 14.782 | 27.257 | 35.074 |
| H | 15.011 | 28.17  | 34.897 |

|   |        |        |        |
|---|--------|--------|--------|
| H | 13.868 | 27.182 | 34.802 |
| O | 14.152 | 13.546 | 36.489 |
| H | 14.342 | 14.316 | 35.953 |
| H | 13.273 | 13.278 | 36.222 |
| O | 23.496 | 18.297 | 32.58  |
| H | 24.328 | 18.387 | 32.116 |
| H | 23.746 | 18.115 | 33.486 |
| O | 15.654 | 23.402 | 40.123 |
| H | 16.395 | 23.758 | 39.633 |
| H | 15.078 | 24.153 | 40.265 |
| O | 21.391 | 22.683 | 44.717 |
| H | 21.162 | 23.588 | 44.928 |
| H | 22.348 | 22.663 | 44.755 |
| O | 17.042 | 29.782 | 42.773 |
| H | 16.589 | 29.144 | 43.324 |
| H | 17.949 | 29.76  | 43.078 |
| O | 17.929 | 21.98  | 40.92  |
| H | 17.033 | 22.306 | 41.002 |
| H | 18.274 | 21.999 | 41.813 |
| O | 25.71  | 26.211 | 46.671 |
| H | 25.573 | 26.056 | 45.737 |
| H | 25.419 | 27.113 | 46.809 |
| O | 12.61  | 17.432 | 32.349 |
| H | 13.116 | 16.846 | 31.786 |
| H | 12.349 | 18.151 | 31.773 |
| O | 11.521 | 16.003 | 35.216 |
| H | 11.875 | 16.688 | 35.783 |
| H | 11.711 | 16.306 | 34.328 |
| O | 16.34  | 20.451 | 43.274 |
| H | 17.095 | 19.9   | 43.065 |
| H | 16.191 | 20.307 | 44.208 |
| O | 16.549 | 25.089 | 34.391 |
| H | 15.819 | 25.598 | 34.038 |
| H | 16.816 | 25.568 | 35.177 |
| O | 12.314 | 24.715 | 46.246 |
| H | 13.188 | 25     | 45.978 |
| H | 11.789 | 24.767 | 45.447 |
| O | 17.872 | 20.241 | 38.82  |
| H | 17.43  | 20.761 | 38.148 |
| H | 17.886 | 20.809 | 39.591 |
| O | 17.36  | 10.233 | 32.141 |
| H | 18.261 | 9.911  | 32.182 |
| H | 16.895 | 9.729  | 32.809 |
| O | 14.024 | 17.062 | 38.885 |
| H | 14.065 | 16.671 | 39.758 |
| H | 14.937 | 17.246 | 38.661 |
| O | 15.437 | 13.442 | 38.695 |



|   |        |        |        |
|---|--------|--------|--------|
| H | 16.314 | 13.579 | 38.337 |
| H | 14.846 | 13.724 | 37.997 |
| O | 16.264 | 20.506 | 46.016 |
| H | 15.843 | 21.359 | 46.124 |
| H | 15.948 | 19.987 | 46.755 |
| O | 20.832 | 17.689 | 45.034 |
| H | 21.013 | 17.911 | 44.121 |
| H | 21.696 | 17.601 | 45.435 |
| O | 24.417 | 13.136 | 53.746 |
| H | 24.06  | 13.209 | 52.861 |
| H | 23.662 | 13.264 | 54.321 |
| O | 6.915  | 16.085 | 33.036 |
| H | 7.459  | 15.938 | 33.81  |
| H | 7.473  | 16.589 | 32.444 |
| O | 13.997 | 15.492 | 30.873 |
| H | 13.292 | 15.525 | 30.227 |
| H | 14.794 | 15.643 | 30.366 |
| O | 19.145 | 16.864 | 37.276 |
| H | 18.998 | 15.924 | 37.376 |
| H | 19.599 | 16.948 | 36.438 |
| O | 13.756 | 10.237 | 37.786 |
| H | 13.995 | 10.489 | 38.678 |
| H | 14.553 | 10.384 | 37.276 |
| O | 25.972 | 14.935 | 33.03  |
| H | 26.528 | 15.503 | 33.564 |
| H | 25.231 | 14.724 | 33.597 |
| O | 23.098 | 12.878 | 40.733 |
| H | 24.041 | 12.936 | 40.577 |
| H | 22.816 | 13.787 | 40.835 |
| O | 12.046 | 24.168 | 43.203 |
| H | 12.944 | 23.937 | 43.441 |
| H | 12.105 | 25.074 | 42.898 |
| O | 22.58  | 20.068 | 40.395 |
| H | 22.831 | 20.964 | 40.617 |
| H | 21.92  | 20.167 | 39.709 |
| O | 5.396  | 14.007 | 33.85  |
| H | 4.926  | 13.62  | 33.112 |
| H | 5.676  | 14.865 | 33.533 |
| O | 19.299 | 21.675 | 43.509 |
| H | 19.291 | 20.794 | 43.883 |
| H | 20.131 | 22.05  | 43.798 |
| O | 18.159 | 12.385 | 35.73  |
| H | 18.956 | 11.914 | 35.485 |
| H | 17.818 | 12.725 | 34.902 |
| O | 19.336 | 23.898 | 39.204 |
| H | 19.015 | 23.126 | 39.669 |
| H | 18.615 | 24.525 | 39.253 |

|   |        |        |        |
|---|--------|--------|--------|
| O | 13.917 | 18.925 | 41.881 |
| H | 14.121 | 19.28  | 41.016 |
| H | 14.731 | 19.018 | 42.376 |
| O | 11.374 | 17.452 | 53.233 |
| H | 10.858 | 17.197 | 52.468 |
| H | 11.19  | 16.772 | 53.882 |
| O | 20.598 | 25.095 | 45.241 |
| H | 19.674 | 25.068 | 44.992 |
| H | 20.597 | 25.456 | 46.127 |
| O | 21.38  | 16.809 | 35.852 |
| H | 22.277 | 16.483 | 35.926 |
| H | 21.461 | 17.618 | 35.347 |
| O | 6.286  | 7.029  | 35.308 |
| H | 6.531  | 7.95   | 35.211 |
| H | 5.407  | 7.054  | 35.686 |
| O | 14.245 | 30.162 | 37.13  |
| H | 15.152 | 29.988 | 36.878 |
| H | 13.882 | 30.656 | 36.395 |
| O | 13.566 | 16.496 | 43.817 |
| H | 13.815 | 17.122 | 43.137 |
| H | 13.52  | 15.655 | 43.362 |
| O | 9.099  | 28.512 | 52.492 |
| H | 9.375  | 27.605 | 52.625 |
| H | 8.19   | 28.532 | 52.792 |
| O | 21.697 | 24.97  | 49.792 |
| H | 21.973 | 25.173 | 48.898 |
| H | 21.817 | 25.79  | 50.271 |
| O | 14.057 | 20.855 | 39.668 |
| H | 13.165 | 21.194 | 39.602 |
| H | 14.555 | 21.567 | 40.068 |
| O | 23.797 | 13.663 | 34.291 |
| H | 23.688 | 13.203 | 35.123 |
| H | 22.904 | 13.821 | 33.985 |
| O | 19.341 | 17.531 | 32.308 |
| H | 19.808 | 16.715 | 32.129 |
| H | 18.942 | 17.767 | 31.47  |
| O | 24.628 | 17.37  | 42.145 |
| H | 25.171 | 18.124 | 42.372 |
| H | 24.336 | 17.022 | 42.987 |
| O | 26.168 | 12.653 | 32.098 |
| H | 26.929 | 12.637 | 31.517 |
| H | 26.155 | 13.544 | 32.449 |
| O | 21.082 | 19.002 | 34.093 |
| H | 21.895 | 19.027 | 33.589 |
| H | 20.518 | 18.4   | 33.608 |
| O | 19.874 | 22.414 | 36.754 |
| H | 20.022 | 21.595 | 37.227 |

|   |        |        |        |
|---|--------|--------|--------|
| H | 19.644 | 23.046 | 37.435 |
| O | 13.964 | 21.588 | 30.529 |
| H | 14.102 | 20.666 | 30.315 |
| H | 13.326 | 21.575 | 31.242 |
| O | 18.626 | 32.12  | 38.011 |
| H | 18.412 | 31.861 | 38.908 |
| H | 19.579 | 32.207 | 38.008 |
| O | 16.689 | 22.158 | 37     |
| H | 16.089 | 21.439 | 36.802 |
| H | 16.119 | 22.876 | 37.275 |
| O | 17.492 | 24.384 | 53.736 |
| H | 17.8   | 25.291 | 53.742 |
| H | 18.241 | 23.879 | 53.418 |
| O | 22.795 | 25.431 | 47.31  |
| H | 22.751 | 25.952 | 46.508 |
| H | 23.706 | 25.507 | 47.595 |
| O | 14.763 | 21.952 | 50.527 |
| H | 14.108 | 21.777 | 51.203 |
| H | 15.603 | 21.84  | 50.972 |
| O | 18.826 | 25.15  | 47.973 |
| H | 18.344 | 24.403 | 47.621 |
| H | 19.423 | 24.768 | 48.617 |
| O | 15.821 | 16.795 | 49.213 |
| H | 16.296 | 16.828 | 50.043 |
| H | 16.461 | 16.459 | 48.585 |
| O | 22.812 | 15.483 | 40.966 |
| H | 22.541 | 15.718 | 40.079 |
| H | 23.362 | 16.213 | 41.251 |
| O | 22.069 | 13.591 | 44.934 |
| H | 21.26  | 13.101 | 45.08  |
| H | 22.42  | 13.739 | 45.812 |
| O | 24.704 | 9.26   | 37.272 |
| H | 24.489 | 8.701  | 38.018 |
| H | 24.029 | 9.063  | 36.623 |
| O | 17.58  | 19.537 | 33.733 |
| H | 18.474 | 19.393 | 33.421 |
| H | 17.296 | 18.68  | 34.05  |
| O | 12.946 | 29.806 | 41.004 |
| H | 12.184 | 30.336 | 41.24  |
| H | 12.772 | 29.525 | 40.105 |
| O | 19.721 | 12.032 | 44.766 |
| H | 19.054 | 12.572 | 44.342 |
| H | 19.611 | 11.165 | 44.376 |
| O | 28.394 | 15.75  | 28.806 |
| H | 29.139 | 15.165 | 28.943 |
| H | 28.579 | 16.508 | 29.361 |
| O | 16.516 | 14.311 | 30.194 |

|   |        |        |        |
|---|--------|--------|--------|
| H | 15.963 | 13.544 | 30.042 |
| H | 17.339 | 14.104 | 29.751 |
| O | 22.333 | 16.529 | 30.984 |
| H | 23.062 | 15.947 | 30.771 |
| H | 22.678 | 17.106 | 31.666 |
| O | 8.952  | 19.691 | 26.583 |
| H | 8.404  | 20.315 | 26.107 |
| H | 8.938  | 18.899 | 26.044 |
| O | 16.59  | 28.312 | 40.299 |
| H | 16.884 | 28.795 | 39.527 |
| H | 16.67  | 28.938 | 41.018 |
| O | 17.501 | 25.692 | 39.102 |
| H | 17.193 | 25.75  | 38.198 |
| H | 17.049 | 26.403 | 39.556 |
| O | 11.697 | 13.019 | 38.567 |
| H | 12.456 | 12.47  | 38.765 |
| H | 11.82  | 13.278 | 37.654 |
| O | 20.603 | 20.178 | 38.325 |
| H | 20.694 | 19.307 | 37.938 |
| H | 19.706 | 20.198 | 38.66  |
| O | 7.947  | 18.362 | 36.184 |
| H | 8.197  | 17.48  | 35.909 |
| H | 8.761  | 18.754 | 36.501 |
| O | 14.666 | 18.802 | 47.613 |
| H | 13.726 | 18.777 | 47.788 |
| H | 15.039 | 18.157 | 48.214 |
| O | 19.896 | 18.522 | 48.262 |
| H | 19.996 | 19.284 | 47.691 |
| H | 20.731 | 18.059 | 48.192 |
| O | 9.826  | 11.759 | 29.796 |
| H | 9.49   | 12.544 | 29.363 |
| H | 9.215  | 11.603 | 30.517 |
| O | 15.448 | 21.254 | 34.315 |
| H | 15.767 | 20.363 | 34.172 |
| H | 14.539 | 21.141 | 34.595 |
| O | 19.513 | 14.202 | 30.641 |
| H | 19.93  | 13.396 | 30.337 |
| H | 19.273 | 14.664 | 29.837 |
| O | 12.483 | 14.625 | 42.186 |
| H | 12.159 | 15.072 | 41.405 |
| H | 12.698 | 13.742 | 41.885 |
| O | 11.022 | 10.336 | 40.493 |
| H | 10.532 | 10.785 | 39.804 |
| H | 10.384 | 10.203 | 41.193 |
| O | 14.318 | 28.92  | 46.099 |
| H | 14.074 | 28.907 | 45.173 |
| H | 13.635 | 28.408 | 46.533 |

|   |        |        |        |
|---|--------|--------|--------|
| O | 20.816 | 14.689 | 42.764 |
| H | 21.379 | 15.092 | 42.102 |
| H | 21.426 | 14.291 | 43.385 |
| O | 19.455 | 18.774 | 50.975 |
| H | 18.988 | 17.946 | 51.091 |
| H | 19.554 | 18.861 | 50.027 |
| O | 18.659 | 19.313 | 44.835 |
| H | 18.081 | 19.315 | 45.598 |
| H | 19.382 | 18.738 | 45.084 |
| O | 16.653 | 25.832 | 43.429 |
| H | 15.884 | 26.297 | 43.099 |
| H | 17.396 | 26.293 | 43.042 |
| O | 22.122 | 10.095 | 44.541 |
| H | 21.996 | 10.405 | 45.438 |
| H | 22.873 | 9.504  | 44.595 |
| O | 10.715 | 27.713 | 41.713 |
| H | 10.595 | 28.13  | 42.567 |
| H | 11.348 | 28.272 | 41.262 |
| O | 18.322 | 8.772  | 36.33  |
| H | 17.978 | 7.887  | 36.457 |
| H | 17.609 | 9.347  | 36.607 |
| O | 29.139 | 11.846 | 36.685 |
| H | 28.419 | 11.465 | 37.189 |
| H | 28.743 | 12.086 | 35.847 |
| O | 16.959 | 26.82  | 36.53  |
| H | 17.375 | 27.596 | 36.906 |
| H | 16.074 | 27.108 | 36.305 |
| O | 10.983 | 10.328 | 27.702 |
| H | 10.411 | 10.916 | 28.196 |
| H | 10.437 | 9.565  | 27.515 |
| O | 23.689 | 11.908 | 36.707 |
| H | 22.972 | 11.867 | 37.339 |
| H | 24.394 | 11.401 | 37.112 |
| O | 26.497 | 6.487  | 36.479 |
| H | 25.82  | 6.539  | 35.804 |
| H | 27.221 | 7.009  | 36.133 |
| O | 21.05  | 10.924 | 32.487 |
| H | 20.774 | 11.841 | 32.473 |
| H | 21.616 | 10.856 | 33.256 |
| O | 10.633 | 20.693 | 28.324 |
| H | 10.087 | 20.183 | 27.725 |
| H | 11.498 | 20.697 | 27.916 |
| O | 18.243 | 14.176 | 33.216 |
| H | 18.418 | 14.181 | 32.275 |
| H | 17.302 | 14.341 | 33.285 |
| O | 18.617 | 14.234 | 37.77  |
| H | 19.096 | 13.828 | 38.492 |

|   |        |        |        |
|---|--------|--------|--------|
| H | 18.34  | 13.5   | 37.222 |
| O | 21.062 | 28.531 | 45.196 |
| H | 21.039 | 28.412 | 46.146 |
| H | 21.333 | 29.441 | 45.075 |
| O | 23.395 | 13.412 | 47.684 |
| H | 24.02  | 12.712 | 47.496 |
| H | 22.788 | 13.027 | 48.316 |
| O | 25.808 | 5.329  | 42.751 |
| H | 26.491 | 4.976  | 43.322 |
| H | 26.28  | 5.874  | 42.122 |
| O | 11.677 | 20.258 | 14.467 |
| H | 10.848 | 20.376 | 14.004 |
| H | 11.637 | 20.88  | 15.194 |
| O | 10.359 | 19.879 | 21.05  |
| H | 10.917 | 20.016 | 21.816 |
| H | 10.83  | 20.304 | 20.333 |
| O | 14.463 | 16.249 | 15.244 |
| H | 14.006 | 16.94  | 14.766 |
| H | 13.778 | 15.622 | 15.473 |
| O | 10.556 | 22.568 | 11.566 |
| H | 11.296 | 22.026 | 11.839 |
| H | 10.082 | 22.025 | 10.935 |
| O | 15.576 | 20.229 | 22.955 |
| H | 16.081 | 19.941 | 23.715 |
| H | 15.759 | 19.572 | 22.283 |
| O | 19.031 | 18.255 | 20.916 |
| H | 18.123 | 18.543 | 21.004 |
| H | 19.04  | 17.374 | 21.29  |
| O | 5.227  | 4.391  | 19.592 |
| H | 5.943  | 3.801  | 19.828 |
| H | 4.73   | 3.912  | 18.929 |
| O | 17.95  | 11.382 | 28.032 |
| H | 18.093 | 11.595 | 27.109 |
| H | 18.824 | 11.405 | 28.421 |
| O | 16.893 | 19.657 | 11.915 |
| H | 16.186 | 19.146 | 11.522 |
| H | 16.449 | 20.271 | 12.5   |
| O | 14.461 | 16.862 | 18.047 |
| H | 14.535 | 16.838 | 17.093 |
| H | 14.973 | 17.627 | 18.309 |
| O | 19.179 | 18.429 | 24.677 |
| H | 19.556 | 19.148 | 24.171 |
| H | 18.235 | 18.584 | 24.647 |
| O | 32.665 | 14.605 | 14.741 |
| H | 32.524 | 15.451 | 15.165 |
| H | 33.398 | 14.755 | 14.144 |
| O | 11.818 | 15.431 | 10.256 |

|   |        |        |        |
|---|--------|--------|--------|
| H | 11.121 | 15.25  | 9.625  |
| H | 11.905 | 14.62  | 10.756 |
| O | 8.466  | 27.001 | 21.048 |
| H | 9.168  | 27.144 | 21.684 |
| H | 7.664  | 27.015 | 21.57  |
| O | 11.411 | 22.591 | 16.053 |
| H | 11.847 | 23.429 | 16.207 |
| H | 11.159 | 22.618 | 15.13  |
| O | 12.385 | 25.948 | 22.952 |
| H | 12.726 | 26.837 | 23.052 |
| H | 11.615 | 26.049 | 22.392 |
| O | 11.014 | 23.219 | 21.001 |
| H | 10.881 | 22.638 | 20.252 |
| H | 11.92  | 23.063 | 21.268 |
| O | 12.389 | 8.881  | 23.328 |
| H | 12.737 | 8      | 23.187 |
| H | 11.47  | 8.819  | 23.068 |
| O | 18.843 | 16.286 | 17.895 |
| H | 18.606 | 16.416 | 18.813 |
| H | 18.696 | 17.139 | 17.486 |
| O | 20.815 | 16.105 | 24.196 |
| H | 20.498 | 15.917 | 23.313 |
| H | 20.166 | 16.707 | 24.56  |
| O | 8.438  | 19.854 | 13.446 |
| H | 7.726  | 20.371 | 13.822 |
| H | 8.272  | 18.961 | 13.747 |
| O | 16.757 | 16.236 | 26.289 |
| H | 16.278 | 17.058 | 26.393 |
| H | 16.085 | 15.557 | 26.348 |
| O | 14.567 | 18.435 | 11.172 |
| H | 14.316 | 17.826 | 10.478 |
| H | 13.986 | 18.22  | 11.901 |
| O | 9.515  | 14.567 | 8.949  |
| H | 8.571  | 14.71  | 9.012  |
| H | 9.612  | 13.905 | 8.264  |
| O | 19.405 | 15.24  | 21.46  |
| H | 18.914 | 14.62  | 20.921 |
| H | 18.824 | 15.43  | 22.197 |
| O | 18.797 | 18.474 | 16.294 |
| H | 18.717 | 19.404 | 16.082 |
| H | 19.679 | 18.386 | 16.656 |
| O | 17.517 | 16.98  | 14.341 |
| H | 16.596 | 16.795 | 14.525 |
| H | 17.811 | 17.501 | 15.089 |
| O | 25.849 | 15.643 | 20.045 |
| H | 25.67  | 16.408 | 19.498 |
| H | 26.572 | 15.916 | 20.61  |

|   |        |        |        |
|---|--------|--------|--------|
| O | 20.085 | 24.868 | 14.384 |
| H | 20.994 | 24.862 | 14.085 |
| H | 19.702 | 24.079 | 14.001 |
| O | 12.432 | 12.136 | 14.973 |
| H | 12.866 | 11.328 | 15.245 |
| H | 11.664 | 11.842 | 14.483 |
| O | 18.136 | 24.364 | 16.165 |
| H | 17.626 | 25.144 | 15.946 |
| H | 18.973 | 24.492 | 15.719 |
| O | 12.822 | 17.871 | 13.747 |
| H | 12.541 | 18.667 | 14.198 |
| H | 12.378 | 17.906 | 12.9   |
| O | 11.288 | 18.384 | 24.544 |
| H | 11.554 | 17.684 | 23.948 |
| H | 11.187 | 17.951 | 25.392 |
| O | 14.378 | 25.877 | 11.865 |
| H | 13.807 | 26.635 | 11.995 |
| H | 14.604 | 25.593 | 12.75  |
| O | 1.135  | 25.067 | 25.849 |
| H | 1.71   | 24.935 | 25.096 |
| H | 1.339  | 24.34  | 26.437 |
| O | 11.81  | 33.844 | 12.369 |
| H | 11.136 | 34.155 | 11.765 |
| H | 11.332 | 33.623 | 13.168 |
| O | 14.886 | 19.833 | 15.543 |
| H | 13.942 | 19.934 | 15.662 |
| H | 15.09  | 20.371 | 14.779 |
| O | 25.288 | 29.674 | 14.675 |
| H | 24.863 | 30.029 | 15.455 |
| H | 25.291 | 28.727 | 14.814 |
| O | 15.776 | 24.297 | 17.874 |
| H | 15.945 | 25.112 | 17.402 |
| H | 16.264 | 23.632 | 17.389 |
| O | 19.413 | 27.379 | 16.074 |
| H | 20.258 | 27.816 | 15.965 |
| H | 19.413 | 26.688 | 15.412 |
| O | 20.795 | 13.492 | 13.705 |
| H | 20.651 | 14.358 | 14.087 |
| H | 19.92  | 13.187 | 13.467 |
| O | 15.009 | 31.034 | 10.426 |
| H | 15.02  | 31.605 | 11.194 |
| H | 14.653 | 31.582 | 9.726  |
| O | 21.034 | 23.453 | 11.507 |
| H | 21.659 | 23.964 | 12.022 |
| H | 20.966 | 23.924 | 10.677 |
| O | 16.774 | 32.792 | 22.525 |
| H | 16.675 | 32.751 | 23.477 |



|   |        |        |        |
|---|--------|--------|--------|
| H | 15.885 | 32.686 | 22.187 |
| O | 16.608 | 24.138 | 11.699 |
| H | 15.998 | 24.865 | 11.571 |
| H | 16.178 | 23.39  | 11.284 |
| O | 19.798 | 26.324 | 11.751 |
| H | 20.019 | 27.144 | 12.192 |
| H | 19.313 | 25.823 | 12.406 |
| O | 14.022 | 18.817 | 29.192 |
| H | 14.274 | 18.517 | 28.319 |
| H | 14.846 | 18.863 | 29.677 |
| O | 13.36  | 25.641 | 9.385  |
| H | 12.444 | 25.744 | 9.645  |
| H | 13.858 | 25.846 | 10.176 |
| O | 18.495 | 30.315 | 14.13  |
| H | 18.546 | 31.002 | 14.795 |
| H | 17.605 | 30.382 | 13.784 |
| O | 18.516 | 14.805 | 28.003 |
| H | 17.912 | 15.425 | 27.595 |
| H | 18.454 | 14.018 | 27.463 |
| O | 16.724 | 8.893  | 23.965 |
| H | 15.886 | 9.043  | 24.403 |
| H | 16.828 | 9.646  | 23.383 |
| O | 19.634 | 19.477 | 11.981 |
| H | 19.83  | 18.541 | 12.002 |
| H | 18.68  | 19.52  | 11.909 |
| O | 15.848 | 21.748 | 13.489 |
| H | 16.679 | 22.223 | 13.453 |
| H | 15.194 | 22.423 | 13.673 |
| O | 14.329 | 12.903 | 13.109 |
| H | 13.434 | 13.224 | 13.21  |
| H | 14.739 | 13.062 | 13.959 |
| O | 20.409 | 28.053 | 18.487 |
| H | 20.067 | 27.798 | 17.631 |
| H | 20.323 | 29.006 | 18.505 |
| O | 8.044  | 26.482 | 10.807 |
| H | 8.073  | 26.863 | 11.684 |
| H | 7.418  | 27.026 | 10.329 |
| O | 15.509 | 26.798 | 20.135 |
| H | 15.415 | 27.575 | 19.584 |
| H | 16.352 | 26.424 | 19.879 |
| O | 16.806 | 26.52  | 15.901 |
| H | 17.583 | 27.063 | 16.029 |
| H | 16.304 | 26.975 | 15.225 |
| O | 13.801 | 21.709 | 20.718 |
| H | 14.116 | 21.402 | 21.567 |
| H | 13.794 | 20.927 | 20.167 |
| O | 15.5   | 16.92  | 23.488 |

|   |        |        |        |
|---|--------|--------|--------|
| H | 15.577 | 17.485 | 24.257 |
| H | 15.129 | 17.486 | 22.811 |
| O | 17.901 | 15.445 | 23.572 |
| H | 16.982 | 15.353 | 23.825 |
| H | 18.346 | 15.709 | 24.376 |
| O | 11.165 | 24.38  | 13.881 |
| H | 10.849 | 24.122 | 13.015 |
| H | 11.257 | 25.331 | 13.829 |
| O | 18.775 | 21.264 | 15.655 |
| H | 18.756 | 21.34  | 14.701 |
| H | 18.317 | 22.044 | 15.968 |
| O | 6.03   | 9.38   | 15.995 |
| H | 5.759  | 9.261  | 16.906 |
| H | 6.345  | 10.283 | 15.955 |
| O | 15.838 | 10.512 | 21.383 |
| H | 14.958 | 10.389 | 21.739 |
| H | 15.774 | 10.214 | 20.476 |
| O | 26.079 | 14.201 | 28.386 |
| H | 26.27  | 13.281 | 28.571 |
| H | 26.884 | 14.664 | 28.618 |
| O | 38.172 | 14.233 | 14.723 |
| H | 38.297 | 14.083 | 15.66  |
| H | 38.723 | 14.99  | 14.526 |
| O | 19.733 | 11.836 | 22.928 |
| H | 19.926 | 10.902 | 22.846 |
| H | 19.342 | 12.074 | 22.088 |
| O | 25.763 | 18.415 | 31.319 |
| H | 25.549 | 17.824 | 30.597 |
| H | 26.72  | 18.433 | 31.339 |
| O | 15.307 | 14.359 | 23.833 |
| H | 14.679 | 13.95  | 24.429 |
| H | 15.182 | 15.299 | 23.962 |
| O | 22.688 | 6.068  | 27.817 |
| H | 23.041 | 5.442  | 28.45  |
| H | 22.188 | 5.53   | 27.202 |
| O | 23.081 | 11.979 | 19.31  |
| H | 23.989 | 12.168 | 19.072 |
| H | 22.71  | 12.832 | 19.536 |
| O | 26.608 | 13.041 | 23.591 |
| H | 26.759 | 12.169 | 23.226 |
| H | 27.483 | 13.413 | 23.692 |
| O | 28.462 | 12.687 | 15.799 |
| H | 28.748 | 13.193 | 16.559 |
| H | 27.523 | 12.865 | 15.733 |
| O | 13.794 | 29.837 | 20.848 |
| H | 13.581 | 30.348 | 20.067 |
| H | 14.727 | 29.993 | 20.99  |

|   |        |        |        |
|---|--------|--------|--------|
| O | 19.412 | 8.438  | 13.081 |
| H | 18.94  | 9.182  | 12.707 |
| H | 18.772 | 8.01   | 13.65  |
| O | 16.181 | 19.21  | 17.824 |
| H | 16.856 | 18.69  | 17.387 |
| H | 15.701 | 19.628 | 17.109 |
| O | 19.791 | 11.786 | 16.171 |
| H | 20.312 | 11.018 | 16.402 |
| H | 20.417 | 12.39  | 15.772 |
| O | 8.759  | 23.717 | 15.159 |
| H | 9.468  | 24.005 | 14.584 |
| H | 9.11   | 23.824 | 16.043 |
| O | 15.593 | 14.828 | 20.847 |
| H | 16.316 | 14.227 | 20.668 |
| H | 15.577 | 14.906 | 21.801 |
| O | 24.251 | 13.715 | 22.235 |
| H | 24.416 | 14.121 | 21.384 |
| H | 25.123 | 13.564 | 22.601 |
| O | 20.434 | 7.693  | 34.843 |
| H | 19.645 | 8.139  | 35.152 |
| H | 20.299 | 7.593  | 33.901 |
| O | 22.986 | 31.236 | 13.525 |
| H | 22.388 | 30.866 | 12.876 |
| H | 23.851 | 30.927 | 13.257 |
| O | 22.223 | 28.822 | 15.294 |
| H | 22.522 | 29.731 | 15.296 |
| H | 22.959 | 28.327 | 15.655 |
| O | 20.491 | 0.583  | 28.118 |
| H | 20.995 | 1.389  | 28.228 |
| H | 20.381 | 0.496  | 27.171 |
| O | 27.75  | 20.872 | 2.505  |
| H | 28.66  | 21.143 | 2.378  |
| H | 27.546 | 20.35  | 1.729  |
| O | 25.005 | 15.887 | 7.109  |
| H | 25.497 | 15.652 | 7.896  |
| H | 25.032 | 16.844 | 7.086  |
| O | 11.681 | 13.06  | 0.636  |
| H | 12.252 | 12.711 | -0.049 |
| H | 10.809 | 13.063 | 0.242  |
| O | 24.826 | 30.914 | 4.108  |
| H | 25.673 | 31.054 | 3.685  |
| H | 24.719 | 31.67  | 4.685  |
| O | 13.236 | 25.701 | 4.637  |
| H | 13.229 | 25.023 | 3.961  |
| H | 14.144 | 26.002 | 4.664  |
| O | 9.069  | 18.073 | 4.873  |
| H | 9.32   | 17.367 | 4.277  |

|   |        |        |        |
|---|--------|--------|--------|
| H | 9.178  | 17.698 | 5.747  |
| O | 16.041 | 27.948 | 0.801  |
| H | 15.584 | 27.107 | 0.772  |
| H | 15.805 | 28.377 | -0.021 |
| O | 23.45  | 29.726 | 2.094  |
| H | 23.959 | 30.178 | 2.767  |
| H | 22.768 | 30.351 | 1.848  |
| O | 15.33  | 19.67  | 8.259  |
| H | 16.228 | 19.487 | 7.982  |
| H | 14.942 | 18.807 | 8.4    |
| O | 21.766 | 19.509 | -0.138 |
| H | 21.251 | 18.91  | -0.678 |
| H | 21.532 | 19.283 | 0.762  |
| O | 18.011 | 16.128 | 8.481  |
| H | 17.79  | 16.055 | 9.409  |
| H | 18.766 | 16.716 | 8.46   |
| O | 24.065 | 20.106 | 3.143  |
| H | 24.24  | 21.047 | 3.113  |
| H | 24.711 | 19.761 | 3.758  |
| O | 26.912 | 16.25  | 9.533  |
| H | 27.49  | 15.505 | 9.693  |
| H | 27.406 | 17.008 | 9.846  |
| O | 19.316 | 11.702 | 7.39   |
| H | 19.418 | 11.247 | 6.554  |
| H | 18.656 | 12.374 | 7.218  |
| O | 19.901 | 20.233 | 9.144  |
| H | 20.252 | 21.123 | 9.151  |
| H | 20.059 | 19.905 | 10.029 |
| O | 28.478 | 16.773 | 6.638  |
| H | 27.818 | 17.467 | 6.622  |
| H | 28.188 | 16.151 | 5.971  |
| O | 22.477 | 9.256  | 5.096  |
| H | 22.802 | 8.802  | 4.319  |
| H | 21.705 | 9.732  | 4.791  |
| O | 18.433 | 26.685 | 5.563  |
| H | 18.058 | 27.144 | 6.315  |
| H | 18.972 | 27.343 | 5.125  |
| O | 26.058 | 25.571 | 4.71   |
| H | 26.06  | 25.43  | 5.657  |
| H | 26.977 | 25.496 | 4.454  |
| O | 28.375 | 12.639 | 0.97   |
| H | 28.707 | 13.536 | 0.914  |
| H | 28.722 | 12.306 | 1.797  |
| O | 30.005 | 17.206 | -2.224 |
| H | 30.484 | 17.6   | -1.495 |
| H | 29.962 | 17.898 | -2.885 |
| O | 26.623 | 27.372 | -1.903 |

|   |        |        |        |
|---|--------|--------|--------|
| H | 26.324 | 26.49  | -1.681 |
| H | 26.113 | 27.948 | -1.332 |
| O | 26.572 | 18.722 | 6.808  |
| H | 26.489 | 19.182 | 5.973  |
| H | 26.723 | 19.416 | 7.45   |
| O | 37.71  | 23.261 | 4.163  |
| H | 37.53  | 22.574 | 4.805  |
| H | 38.575 | 23.045 | 3.817  |
| O | 19.594 | 20.043 | 5.382  |
| H | 20.221 | 19.371 | 5.114  |
| H | 20.135 | 20.745 | 5.742  |
| O | 15.561 | 22.276 | 3.033  |
| H | 15.625 | 23.139 | 2.624  |
| H | 16.371 | 22.188 | 3.536  |
| O | 20.079 | 25.159 | 2.605  |
| H | 19.141 | 24.971 | 2.568  |
| H | 20.136 | 26.11  | 2.513  |
| O | 17.889 | 19.351 | 7.727  |
| H | 18.272 | 19.26  | 6.854  |
| H | 18.633 | 19.554 | 8.295  |
| O | 27.46  | 31.215 | 7.753  |
| H | 27.064 | 31.621 | 6.982  |
| H | 26.854 | 30.514 | 7.993  |
| O | 17.677 | 22.544 | 8.659  |
| H | 18.195 | 21.781 | 8.917  |
| H | 16.879 | 22.479 | 9.183  |
| O | 9.762  | 22.952 | 3.432  |
| H | 10.303 | 23.316 | 2.731  |
| H | 10.247 | 23.146 | 4.234  |
| O | 24.398 | 27.121 | 10.062 |
| H | 24.903 | 26.366 | 10.366 |
| H | 23.81  | 27.324 | 10.789 |
| O | 28.567 | 24.217 | 11.618 |
| H | 28.54  | 25.17  | 11.532 |
| H | 27.806 | 24.003 | 12.158 |
| O | 17.938 | 21.895 | 4.083  |
| H | 18.457 | 21.271 | 4.588  |
| H | 18.28  | 21.826 | 3.192  |
| O | 29.975 | 30.934 | 9.609  |
| H | 30.402 | 30.097 | 9.425  |
| H | 29.061 | 30.795 | 9.362  |
| O | 29.101 | 23.877 | 6.823  |
| H | 29.313 | 23.36  | 7.6    |
| H | 28.427 | 24.489 | 7.119  |
| O | 30.892 | 12.576 | 7.549  |
| H | 30.352 | 13.229 | 7.993  |
| H | 31.79  | 12.802 | 7.792  |

|   |        |        |        |
|---|--------|--------|--------|
| O | 8.666  | 28.586 | 13.304 |
| H | 8.975  | 28.21  | 14.128 |
| H | 8.989  | 29.487 | 13.315 |
| O | 17.547 | 13.847 | 2.115  |
| H | 18.296 | 13.368 | 2.469  |
| H | 17.079 | 14.163 | 2.888  |
| O | 21.828 | 24.415 | 4.582  |
| H | 22.69  | 24.651 | 4.24   |
| H | 21.222 | 24.625 | 3.872  |
| O | 24.927 | 9.947  | 6.667  |
| H | 24.546 | 10.806 | 6.488  |
| H | 24.206 | 9.332  | 6.533  |
| O | 27.363 | 21.091 | 8.056  |
| H | 27.957 | 21.666 | 8.537  |
| H | 26.562 | 21.081 | 8.58   |
| O | 19.795 | 10.778 | 1.054  |
| H | 20.177 | 11.555 | 1.462  |
| H | 19.093 | 10.515 | 1.65   |
| O | 16.483 | 16.758 | 0.653  |
| H | 16.466 | 16.727 | 1.61   |
| H | 17.241 | 17.305 | 0.444  |
| O | 17.401 | 11.405 | -0.056 |
| H | 16.952 | 10.743 | 0.47   |
| H | 18.242 | 11.529 | 0.383  |
| O | 27.297 | 12.888 | 10.375 |
| H | 26.856 | 12.808 | 11.221 |
| H | 27.864 | 12.118 | 10.327 |
| O | 9.775  | 15.934 | 3.279  |
| H | 10.67  | 15.942 | 2.94   |
| H | 9.425  | 15.085 | 3.009  |
| O | 20.268 | 16.543 | 11.886 |
| H | 19.989 | 15.692 | 11.547 |
| H | 20.194 | 16.457 | 12.837 |
| O | 15.194 | 24.834 | 2.414  |
| H | 15.373 | 25.056 | 1.5    |
| H | 15.8   | 25.378 | 2.916  |
| O | 24.228 | 17.856 | 1.107  |
| H | 24.966 | 18.464 | 1.143  |
| H | 23.529 | 18.298 | 1.589  |
| O | 32.002 | 19.06  | 4.83   |
| H | 31.208 | 18.851 | 4.338  |
| H | 31.685 | 19.475 | 5.632  |
| O | 27.585 | 18.217 | 11.689 |
| H | 27.228 | 18.259 | 12.576 |
| H | 28.224 | 18.93  | 11.654 |
| O | 17.593 | 23.814 | 0.472  |
| H | 18.222 | 23.124 | 0.681  |

|   |        |        |        |
|---|--------|--------|--------|
| H | 17.435 | 24.255 | 1.307  |
| O | 21.883 | 25.957 | 6.913  |
| H | 22.805 | 25.907 | 7.163  |
| H | 21.784 | 25.294 | 6.229  |
| O | 20.373 | 15.027 | 4.158  |
| H | 19.528 | 15.462 | 4.271  |
| H | 20.877 | 15.276 | 4.933  |
| O | 27.427 | 21.549 | -3.217 |
| H | 27.925 | 21.438 | -4.028 |
| H | 27.228 | 22.484 | -3.184 |
| O | 33.149 | 27.69  | 0.087  |
| H | 33.457 | 26.786 | 0.022  |
| H | 33.536 | 28.017 | 0.899  |
| O | 17.232 | 21.118 | -2.684 |
| H | 18     | 21.388 | -3.187 |
| H | 17.583 | 20.857 | -1.833 |
| O | 7.911  | 13.308 | 11.183 |
| H | 8.272  | 14.099 | 10.783 |
| H | 6.962  | 13.435 | 11.151 |
| O | 25.308 | 22.496 | 6.223  |
| H | 26.164 | 22.301 | 6.605  |
| H | 24.748 | 21.774 | 6.508  |
| O | 24.913 | 28.741 | 5.741  |
| H | 25.368 | 28.097 | 5.198  |
| H | 24.855 | 29.521 | 5.19   |
| O | 29.725 | 19.782 | 11.088 |
| H | 30.278 | 20.546 | 10.927 |
| H | 29.883 | 19.209 | 10.337 |
| O | 20.99  | 22.163 | 5.98   |
| H | 21.874 | 21.797 | 5.962  |
| H | 21.097 | 23.064 | 5.674  |
| O | 21.549 | 22.257 | 8.51   |
| H | 21.378 | 23.181 | 8.692  |
| H | 21.034 | 22.069 | 7.726  |
| O | 20.628 | 29.157 | 1.47   |
| H | 19.671 | 29.132 | 1.462  |
| H | 20.89  | 28.243 | 1.572  |
| O | 24.993 | 30.51  | 11.142 |
| H | 25.321 | 29.779 | 11.665 |
| H | 25.113 | 30.228 | 10.235 |
| O | 17.413 | 13.828 | 7.145  |
| H | 17.953 | 14.587 | 7.364  |
| H | 16.562 | 14.018 | 7.542  |
| O | 15.375 | 21.29  | 5.89   |
| H | 16.093 | 21.922 | 5.843  |
| H | 15.514 | 20.83  | 6.718  |
| O | 24.294 | 27.077 | 15.91  |

|   |        |        |        |
|---|--------|--------|--------|
| H | 24.065 | 26.636 | 16.729 |
| H | 24.302 | 26.378 | 15.256 |
| O | 22.086 | 18.62  | 4.794  |
| H | 22.925 | 19.081 | 4.811  |
| H | 22.157 | 17.967 | 5.49   |
| O | 26.487 | 18.891 | 4.024  |
| H | 26.884 | 19.542 | 3.445  |
| H | 27.115 | 18.169 | 4.04   |
| O | 23.287 | 18.55  | 8.478  |
| H | 24.127 | 18.696 | 8.915  |
| H | 22.942 | 17.754 | 8.883  |
| O | 23.985 | 25.166 | 3.206  |
| H | 24.608 | 24.521 | 2.872  |
| H | 24.481 | 25.664 | 3.856  |
| O | 30.949 | 29.581 | -0.388 |
| H | 30.768 | 28.975 | -1.107 |
| H | 31.828 | 29.345 | -0.091 |
| O | 12.591 | 22.676 | 7.967  |
| H | 13.269 | 23.296 | 7.697  |
| H | 12.05  | 23.166 | 8.585  |
| O | 24.19  | 33.043 | 9.905  |
| H | 25.138 | 33.107 | 9.789  |
| H | 24.062 | 32.224 | 10.383 |
| O | 22.706 | 24.944 | 13.38  |
| H | 22.782 | 25.827 | 13.016 |
| H | 23.495 | 24.835 | 13.911 |
| O | 24.327 | 24.996 | 7.601  |
| H | 24.762 | 24.178 | 7.362  |
| H | 24.693 | 25.222 | 8.456  |
| O | 11.227 | 24.177 | 5.479  |
| H | 11.126 | 23.999 | 6.414  |
| H | 12.03  | 24.694 | 5.42   |
| O | 23.364 | 20.73  | 6.94   |
| H | 22.845 | 21.346 | 7.457  |
| H | 23.223 | 19.883 | 7.364  |
| O | 25.617 | 19.369 | 9.938  |
| H | 26.418 | 19.067 | 10.366 |
| H | 25.115 | 19.788 | 10.637 |
| O | 14.249 | 16.865 | 8.477  |
| H | 14.709 | 16.026 | 8.469  |
| H | 13.547 | 16.747 | 9.117  |
| O | 16.773 | 16.503 | 11.382 |
| H | 16.161 | 17.166 | 11.063 |
| H | 17.266 | 16.945 | 12.073 |
| O | 27.357 | 25.57  | 9.047  |
| H | 26.767 | 25.23  | 9.72   |
| H | 28.05  | 26.013 | 9.538  |



|   |        |        |        |
|---|--------|--------|--------|
| O | 29.222 | 22.503 | 9.512  |
| H | 28.903 | 23.157 | 10.133 |
| H | 30.032 | 22.176 | 9.902  |
| O | 20.065 | 15.917 | 14.662 |
| H | 19.121 | 16.037 | 14.76  |
| H | 20.442 | 16.336 | 15.436 |
| O | 22.84  | 15.24  | 1.218  |
| H | 23.314 | 15.147 | 2.044  |
| H | 23.079 | 16.111 | 0.901  |
| O | 19.747 | 28.853 | 4.167  |
| H | 20.523 | 28.758 | 4.72   |
| H | 20.09  | 29.148 | 3.323  |
| O | 17.757 | 25.255 | 7.911  |
| H | 17.828 | 24.363 | 8.251  |
| H | 18.564 | 25.385 | 7.412  |
| O | 24.373 | 22.145 | 10.584 |
| H | 24.098 | 22.027 | 11.493 |
| H | 23.586 | 21.966 | 10.07  |
| O | 17.234 | 32.81  | 3.16   |
| H | 17.984 | 32.581 | 3.709  |
| H | 17.126 | 32.059 | 2.576  |
| O | 22.316 | 16.363 | 6.466  |
| H | 23.231 | 16.266 | 6.2    |
| H | 22.253 | 15.879 | 7.289  |
| O | 29.634 | 14.138 | 13.791 |
| H | 29.427 | 13.58  | 14.541 |
| H | 30.589 | 14.201 | 13.796 |
| O | 21.611 | 31.667 | 1.272  |
| H | 21.09  | 30.865 | 1.265  |
| H | 20.975 | 32.365 | 1.428  |
| O | 6.854  | 21.859 | 6.969  |
| H | 6.484  | 21.552 | 7.797  |
| H | 6.907  | 21.074 | 6.425  |
| O | 6.767  | 28.59  | -4.833 |
| H | 6.219  | 28.64  | -4.05  |
| H | 6.147  | 28.467 | -5.552 |
| O | 25.249 | 29.283 | 8.456  |
| H | 25.391 | 29.041 | 7.541  |
| H | 24.924 | 28.483 | 8.869  |
| O | 7.252  | 20.142 | 4.868  |
| H | 8.05   | 19.614 | 4.848  |
| H | 6.561  | 19.543 | 4.584  |
| O | 30.461 | 25.687 | 9.351  |
| H | 31.251 | 25.536 | 9.869  |
| H | 30.652 | 25.289 | 8.502  |
| O | 25.485 | 24.651 | 10.825 |
| H | 25.692 | 24.586 | 11.757 |

|   |        |        |        |
|---|--------|--------|--------|
| H | 25.085 | 23.808 | 10.609 |
| O | 11.178 | 19.367 | 5.927  |
| H | 11.483 | 20.253 | 5.734  |
| H | 10.527 | 19.185 | 5.249  |
| O | 31.719 | 21.523 | 10.328 |
| H | 32.208 | 20.722 | 10.514 |
| H | 32.106 | 21.857 | 9.519  |
| O | 12.194 | 15.257 | 7.292  |
| H | 12.893 | 14.606 | 7.226  |
| H | 12.633 | 16.095 | 7.147  |
| O | 25.546 | 24.756 | -1.106 |
| H | 25.217 | 24.028 | -0.578 |
| H | 26.304 | 24.395 | -1.566 |
| O | 31.005 | 20.41  | 6.887  |
| H | 30.591 | 20.784 | 6.109  |
| H | 31.501 | 21.136 | 7.267  |
| O | 22.884 | 13.68  | 7.837  |
| H | 23.203 | 13.279 | 7.029  |
| H | 23.677 | 13.948 | 8.301  |
| O | 20.9   | 12.869 | 9.301  |
| H | 20.252 | 12.399 | 8.777  |
| H | 21.524 | 13.211 | 8.661  |
| O | 30.883 | 19.134 | -3.967 |
| H | 31.683 | 19.568 | -3.672 |
| H | 31.049 | 18.925 | -4.887 |
| O | 26.553 | 14.614 | 5.058  |
| H | 26.317 | 15.05  | 5.876  |
| H | 26.761 | 15.329 | 4.456  |
| O | 8.357  | 10.99  | -1.977 |
| H | 9.101  | 10.484 | -2.301 |
| H | 7.673  | 10.339 | -1.822 |
| O | 12.741 | 21.495 | 5.508  |
| H | 12.638 | 22.049 | 6.282  |
| H | 13.675 | 21.54  | 5.303  |
| O | 17.667 | 24.596 | 3.789  |
| H | 18.125 | 25.2   | 4.374  |
| H | 17.89  | 23.726 | 4.12   |
| O | 19.366 | 14.289 | 10.953 |
| H | 18.51  | 13.868 | 11.029 |
| H | 19.906 | 13.651 | 10.488 |
| O | 20.325 | 17.527 | 8.168  |
| H | 20.622 | 18.127 | 8.852  |
| H | 21.128 | 17.124 | 7.837  |
| O | 30.116 | 28.626 | 3.509  |
| H | 29.761 | 29.365 | 3.015  |
| H | 29.755 | 28.731 | 4.389  |
| O | 9.998  | 9.875  | 10.861 |

|   |        |        |        |
|---|--------|--------|--------|
| H | 10.519 | 9.873  | 10.059 |
| H | 9.122  | 9.613  | 10.579 |
| O | 10.753 | 29.493 | 9.418  |
| H | 10.951 | 28.564 | 9.294  |
| H | 9.8    | 29.546 | 9.348  |
| O | 24.821 | 12.699 | 5.904  |
| H | 25.491 | 13.332 | 5.642  |
| H | 24.39  | 12.455 | 5.086  |
| O | 21.735 | 20.886 | 11.276 |
| H | 21     | 20.364 | 11.598 |
| H | 21.517 | 21.785 | 11.523 |
| O | 28.676 | 29.243 | 6.106  |
| H | 28.907 | 28.802 | 6.923  |
| H | 28.156 | 29.998 | 6.38   |
| O | 16.044 | 29.762 | 3.557  |
| H | 15.132 | 29.965 | 3.349  |
| H | 16.022 | 29.467 | 4.467  |
| O | 19.592 | 24.548 | -2.628 |
| H | 19.743 | 23.782 | -3.183 |
| H | 20.36  | 25.101 | -2.769 |
| O | 21.323 | 29.811 | -2.478 |
| H | 20.934 | 30.236 | -3.243 |
| H | 20.574 | 29.481 | -1.981 |
| O | 29.433 | 6.738  | 1.567  |
| H | 28.894 | 6.679  | 2.356  |
| H | 29.42  | 5.854  | 1.202  |
| O | 20.871 | 13.093 | 2.163  |
| H | 21.448 | 13.631 | 1.621  |
| H | 20.769 | 13.592 | 2.973  |
| O | 25.296 | 14.773 | -1.874 |
| H | 25.193 | 14.311 | -2.706 |
| H | 24.669 | 15.495 | -1.922 |
| O | 25.704 | 12.349 | 0.835  |
| H | 26.619 | 12.629 | 0.86   |
| H | 25.54  | 12.146 | -0.086 |
| O | 26.007 | 26.76  | 13.232 |
| H | 26.114 | 25.91  | 13.66  |
| H | 26.817 | 26.882 | 12.738 |
| O | 18.607 | 10.825 | 11.516 |
| H | 18.514 | 11.472 | 12.214 |
| H | 17.758 | 10.823 | 11.075 |
| O | 24.006 | 9.812  | 12.629 |
| H | 23.494 | 10.614 | 12.527 |
| H | 23.403 | 9.194  | 13.043 |
| O | 22.107 | 28.52  | 5.877  |
| H | 21.835 | 27.668 | 6.218  |
| H | 23.035 | 28.41  | 5.671  |

|   |        |        |        |
|---|--------|--------|--------|
| O | 27.228 | 5.007  | 59.048 |
| H | 26.818 | 5.776  | 58.654 |
| H | 28.127 | 5.02   | 58.72  |
| O | 23.44  | -0.106 | 61.596 |
| H | 22.746 | -0.665 | 61.246 |
| H | 22.975 | 0.627  | 62     |
| O | 10.548 | 6.611  | 64.585 |
| H | 10.971 | 5.764  | 64.727 |
| H | 10.333 | 6.921  | 65.465 |
| O | 25.268 | 1.908  | 61.124 |
| H | 24.721 | 1.165  | 61.379 |
| H | 25.245 | 1.906  | 60.167 |
| O | 8.236  | -0.726 | 50.938 |
| H | 8.521  | 0.077  | 50.501 |
| H | 7.316  | -0.57  | 51.149 |
| O | 13.268 | 5.057  | 56.348 |
| H | 13.434 | 4.388  | 57.013 |
| H | 13.935 | 4.902  | 55.68  |
| O | 16.025 | 5.232  | 51.702 |
| H | 15.539 | 4.854  | 50.97  |
| H | 16.578 | 5.903  | 51.302 |
| O | 19.18  | 8.748  | 58.127 |
| H | 18.243 | 8.74   | 57.93  |
| H | 19.25  | 9.26   | 58.933 |
| O | 20.541 | 17.884 | 57.227 |
| H | 20.843 | 17.008 | 57.464 |
| H | 19.586 | 17.816 | 57.226 |
| O | 11.416 | 7.171  | 51.403 |
| H | 11.583 | 6.233  | 51.312 |
| H | 11.908 | 7.572  | 50.686 |
| O | 23.572 | 6.669  | 59.282 |
| H | 24.357 | 6.627  | 58.736 |
| H | 22.857 | 6.818  | 58.664 |
| O | 24.607 | 5.691  | 65.491 |
| H | 25.086 | 6.344  | 64.98  |
| H | 24.083 | 6.205  | 66.105 |
| O | 26.594 | 1.421  | 63.853 |
| H | 26.369 | 1.606  | 62.941 |
| H | 27.538 | 1.571  | 63.902 |
| O | 21.894 | 3.143  | 56.332 |
| H | 21.75  | 2.479  | 57.007 |
| H | 21.146 | 3.735  | 56.416 |
| O | 23.108 | 4.583  | 49.733 |
| H | 22.305 | 4.277  | 49.311 |
| H | 22.878 | 4.656  | 50.66  |
| O | 15.117 | 4.361  | 54.327 |
| H | 15.379 | 4.842  | 53.542 |

|   |        |        |        |
|---|--------|--------|--------|
| H | 15.283 | 3.443  | 54.112 |
| O | 12.641 | 0.689  | 48.698 |
| H | 12.563 | -0.265 | 48.681 |
| H | 13.482 | 0.854  | 49.125 |
| O | 29.996 | 1.552  | 57.179 |
| H | 29.823 | 1.745  | 56.257 |
| H | 29.168 | 1.735  | 57.622 |
| O | 16.165 | -6.385 | 56.772 |
| H | 16.569 | -7.115 | 56.302 |
| H | 15.347 | -6.744 | 57.115 |
| O | 5.76   | 0.411  | 51.452 |
| H | 5.245  | 0.409  | 52.26  |
| H | 5.193  | -0.01  | 50.806 |
| O | 13.657 | 2.66   | 57.714 |
| H | 14.103 | 1.9    | 58.09  |
| H | 13.139 | 2.3    | 56.993 |
| O | 12.538 | 12.201 | 53.72  |
| H | 12.881 | 12.536 | 54.548 |
| H | 13.068 | 12.632 | 53.049 |
| O | 28.653 | 15.43  | 55.031 |
| H | 29.022 | 15.959 | 55.739 |
| H | 29.294 | 14.733 | 54.893 |
| O | 15.221 | 11.447 | 57.15  |
| H | 15.658 | 12.135 | 57.652 |
| H | 15.743 | 11.362 | 56.353 |
| O | 30.511 | 5.608  | 46.517 |
| H | 30.389 | 6.02   | 45.662 |
| H | 31.392 | 5.868  | 46.785 |
| O | 20.185 | 5.688  | 55.368 |
| H | 19.27  | 5.407  | 55.407 |
| H | 20.259 | 6.148  | 54.532 |
| O | 23.358 | 0.548  | 52.859 |
| H | 22.976 | -0.32  | 52.989 |
| H | 23.663 | 0.808  | 53.728 |
| O | 25.509 | -7.227 | 56.824 |
| H | 26.361 | -7.116 | 57.246 |
| H | 25.718 | -7.486 | 55.927 |
| O | 20.715 | -1.49  | 53.724 |
| H | 20.416 | -1.334 | 54.62  |
| H | 21.07  | -2.379 | 53.742 |
| O | 14.98  | -0.516 | 58.022 |
| H | 14.972 | -1.37  | 58.454 |
| H | 14.993 | -0.72  | 57.087 |
| O | 30.045 | 6.181  | 55.327 |
| H | 29.226 | 5.811  | 54.997 |
| H | 30.283 | 6.849  | 54.684 |
| O | 17.722 | 4.69   | 55.814 |

|   |        |        |        |
|---|--------|--------|--------|
| H | 17.657 | 5.229  | 56.602 |
| H | 16.843 | 4.332  | 55.695 |
| O | 16.951 | 7.203  | 49.908 |
| H | 17.763 | 6.711  | 49.786 |
| H | 17.238 | 8.071  | 50.192 |
| O | 19.784 | 7.045  | 46.414 |
| H | 20.43  | 6.63   | 46.985 |
| H | 18.94  | 6.83   | 46.812 |
| O | 35.468 | 1.542  | 52.845 |
| H | 34.928 | 0.947  | 53.366 |
| H | 36.216 | 1.011  | 52.574 |
| O | 21.255 | -1.073 | 56.642 |
| H | 21.333 | -1.72  | 57.343 |
| H | 20.788 | -0.34  | 57.043 |
| O | 24.575 | 6.028  | 45.115 |
| H | 24.933 | 5.518  | 44.389 |
| H | 24.318 | 5.373  | 45.764 |
| O | 5.005  | -1.378 | 49.61  |
| H | 5.706  | -1.733 | 49.064 |
| H | 4.25   | -1.937 | 49.424 |
| O | 24.989 | 0.888  | 57.814 |
| H | 25.552 | 0.13   | 57.975 |
| H | 24.353 | 0.582  | 57.168 |
| O | 23.221 | 12.758 | 58.412 |
| H | 23.838 | 13.474 | 58.564 |
| H | 23.188 | 12.288 | 59.245 |
| O | 27.502 | 11.072 | 55.236 |
| H | 28.026 | 10.438 | 55.725 |
| H | 26.671 | 11.112 | 55.71  |
| O | 18.522 | 21.657 | 51.062 |
| H | 19.156 | 21.842 | 50.369 |
| H | 18.874 | 20.888 | 51.509 |
| O | 23.035 | 9.078  | 48.93  |
| H | 22.936 | 8.241  | 48.477 |
| H | 23.724 | 8.921  | 49.575 |
| O | 21.733 | 11.653 | 49.811 |
| H | 21.181 | 11.809 | 49.046 |
| H | 22.178 | 10.827 | 49.622 |
| O | 15.255 | 1.911  | 53.753 |
| H | 16.098 | 1.505  | 53.554 |
| H | 14.876 | 1.356  | 54.434 |
| O | 30.662 | 17.22  | 50.303 |
| H | 30.448 | 16.384 | 50.715 |
| H | 31.129 | 16.981 | 49.502 |
| O | 16.521 | 13.391 | 49.513 |
| H | 17.063 | 12.966 | 48.848 |
| H | 16.984 | 14.205 | 49.713 |

|   |        |        |        |
|---|--------|--------|--------|
| O | 28.754 | -2.594 | 60.54  |
| H | 27.89  | -3.005 | 60.537 |
| H | 29.082 | -2.72  | 59.649 |
| O | 14.542 | 6.48   | 49.124 |
| H | 14.504 | 5.526  | 49.06  |
| H | 15.467 | 6.674  | 49.274 |
| O | 10.785 | 0.71   | 46.779 |
| H | 10.203 | -0.03  | 46.952 |
| H | 11.47  | 0.636  | 47.443 |
| O | 36.482 | 7.686  | 64.509 |
| H | 36.943 | 7.028  | 65.03  |
| H | 35.734 | 7.217  | 64.139 |
| O | 21.438 | 10.389 | 57.357 |
| H | 21.066 | 11.27  | 57.395 |
| H | 20.801 | 9.841  | 57.816 |
| O | 12.797 | 7.653  | 55.749 |
| H | 12.886 | 6.758  | 56.078 |
| H | 12.336 | 7.557  | 54.915 |
| O | 23.114 | 13.298 | 51.322 |
| H | 22.561 | 12.597 | 50.976 |
| H | 22.96  | 14.037 | 50.733 |
| O | 22.901 | 8.902  | 53.531 |
| H | 23.183 | 7.989  | 53.587 |
| H | 23.706 | 9.408  | 53.642 |
| O | 15.39  | -1.598 | 55.495 |
| H | 16.332 | -1.683 | 55.348 |
| H | 14.991 | -1.929 | 54.69  |
| O | 19.814 | 6.274  | 49.521 |
| H | 20.44  | 6.705  | 50.103 |
| H | 20.088 | 5.357  | 49.511 |
| O | 22.478 | 7.278  | 51.251 |
| H | 22.802 | 8.172  | 51.145 |
| H | 23.212 | 6.724  | 50.986 |
| O | 19.924 | 2.408  | 46.032 |
| H | 19.98  | 2.918  | 45.225 |
| H | 19.375 | 1.658  | 45.805 |
| O | 20.234 | 7.74   | 52.791 |
| H | 20.317 | 8.293  | 53.568 |
| H | 21.126 | 7.675  | 52.447 |
| O | 17.315 | 9.233  | 47.078 |
| H | 16.473 | 9.35   | 47.519 |
| H | 17.882 | 8.843  | 47.743 |
| O | 10.42  | -0.714 | 52.939 |
| H | 9.818  | -0.504 | 52.225 |
| H | 9.892  | -0.618 | 53.732 |
| O | 23.896 | -0.392 | 55.675 |
| H | 23.172 | -0.78  | 56.167 |

|   |        |        |        |
|---|--------|--------|--------|
| H | 24.529 | -1.104 | 55.58  |
| O | 26.197 | 7.732  | 47.088 |
| H | 25.683 | 7.532  | 46.305 |
| H | 25.678 | 7.381  | 47.811 |
| O | 33.517 | 2.594  | 47.586 |
| H | 33.367 | 2.494  | 48.526 |
| H | 32.689 | 2.332  | 47.183 |
| O | 17.764 | 3.265  | 51.134 |
| H | 17.134 | 3.949  | 51.363 |
| H | 17.626 | 3.116  | 50.198 |
| O | 28.08  | 5.041  | 53.758 |
| H | 28.89  | 4.884  | 53.273 |
| H | 27.528 | 4.286  | 53.554 |
| O | 25.613 | 5.314  | 49.286 |
| H | 26.077 | 4.581  | 48.882 |
| H | 24.894 | 4.906  | 49.768 |
| O | 25.754 | -2.423 | 52.968 |
| H | 25.635 | -3.131 | 52.334 |
| H | 25.248 | -2.699 | 53.732 |
| O | 18.402 | 14.572 | 58.785 |
| H | 18.169 | 14.247 | 59.655 |
| H | 18.092 | 15.478 | 58.778 |
| O | 34.118 | 6.234  | 52.854 |
| H | 34.101 | 5.402  | 52.38  |
| H | 33.428 | 6.148  | 53.513 |
| O | 8.589  | 6.191  | 53.433 |
| H | 8.099  | 6.31   | 54.247 |
| H | 8.759  | 5.25   | 53.392 |
| O | 20.788 | 9.732  | 54.627 |
| H | 21.559 | 9.398  | 54.169 |
| H | 21.141 | 10.184 | 55.393 |
| O | 17.497 | 19.723 | 59.502 |
| H | 17.368 | 19.146 | 58.749 |
| H | 16.628 | 19.798 | 59.897 |
| O | 13.361 | 6.129  | 46.526 |
| H | 13.555 | 5.193  | 46.575 |
| H | 13.81  | 6.506  | 47.284 |
| O | 32.696 | 14.923 | 58.644 |
| H | 32.231 | 14.434 | 57.964 |
| H | 33.617 | 14.87  | 58.389 |
| O | 15.038 | 13.728 | 45.166 |
| H | 15.8   | 13.599 | 45.731 |
| H | 14.483 | 14.34  | 45.649 |
| O | 17.703 | 2.191  | 48.342 |
| H | 17.097 | 1.466  | 48.19  |
| H | 17.879 | 2.543  | 47.469 |
| O | 28.111 | 0.699  | 42.858 |



|   |        |        |        |
|---|--------|--------|--------|
| H | 27.628 | 1.523  | 42.8   |
| H | 27.463 | 0.027  | 42.649 |
| O | 13.696 | 6.109  | 42.113 |
| H | 12.794 | 6.262  | 42.395 |
| H | 14.069 | 6.985  | 42.018 |
| O | 8.994  | 6.495  | 40.733 |
| H | 8.413  | 5.736  | 40.764 |
| H | 9.537  | 6.35   | 39.958 |
| O | 27.458 | 3.801  | 34.979 |
| H | 27.072 | 4.535  | 35.456 |
| H | 26.713 | 3.248  | 34.744 |
| O | 13.158 | 11.866 | 41.548 |
| H | 13.314 | 11.382 | 42.359 |
| H | 12.585 | 11.296 | 41.035 |
| O | 10.795 | -3.691 | 29.813 |
| H | 11.523 | -3.455 | 30.388 |
| H | 10.689 | -2.934 | 29.237 |
| O | 25.183 | 15.902 | 30.383 |
| H | 25.432 | 15.163 | 29.827 |
| H | 25.276 | 15.571 | 31.277 |
| O | 20.787 | 2.84   | 36.465 |
| H | 21.083 | 2.308  | 37.204 |
| H | 19.868 | 3.025  | 36.657 |
| O | 18.817 | 1.365  | 34.201 |
| H | 17.964 | 1.786  | 34.303 |
| H | 19.45  | 2.056  | 34.395 |
| O | 15.428 | 6.221  | 38.635 |
| H | 14.594 | 6.636  | 38.854 |
| H | 16.062 | 6.633  | 39.222 |
| O | 14.561 | 11.955 | 51.034 |
| H | 15.028 | 11.556 | 51.769 |
| H | 15.248 | 12.364 | 50.508 |
| O | 8.022  | 1.107  | 28.216 |
| H | 7.674  | 0.365  | 27.722 |
| H | 7.989  | 1.84   | 27.602 |
| O | 27.576 | 6.965  | 40.956 |
| H | 27.945 | 7.738  | 41.384 |
| H | 28.264 | 6.303  | 41.022 |
| O | 21.582 | 15.333 | 38.408 |
| H | 21.193 | 15.413 | 37.537 |
| H | 21.295 | 14.475 | 38.72  |
| O | 29.867 | 10.192 | 31.666 |
| H | 30.485 | 10.42  | 32.36  |
| H | 29.145 | 10.81  | 31.776 |
| O | 29.45  | -0.004 | 40.738 |
| H | 29.794 | -0.892 | 40.835 |
| H | 28.891 | 0.121  | 41.505 |

|   |        |        |        |
|---|--------|--------|--------|
| O | 21.272 | -0.55  | 40.247 |
| H | 20.323 | -0.673 | 40.222 |
| H | 21.614 | -1.206 | 39.639 |
| O | 30.884 | 0.671  | 44.27  |
| H | 31.579 | 0.211  | 43.799 |
| H | 30.078 | 0.402  | 43.83  |
| O | 22.077 | 0.619  | 37.643 |
| H | 23.009 | 0.428  | 37.751 |
| H | 21.725 | 0.605  | 38.533 |
| O | 17.478 | 7.048  | 39.84  |
| H | 18.377 | 6.983  | 39.519 |
| H | 17.565 | 7.081  | 40.793 |
| O | 20.17  | 4.508  | 44.15  |
| H | 19.274 | 4.486  | 43.816 |
| H | 20.485 | 5.386  | 43.935 |
| O | 30.497 | 8.321  | 39.538 |
| H | 30.55  | 9.243  | 39.791 |
| H | 31.246 | 7.911  | 39.971 |
| O | 26.243 | 10.193 | 42.665 |
| H | 26.083 | 10.176 | 41.721 |
| H | 27.163 | 9.944  | 42.755 |
| O | 26.957 | 4.029  | 31.93  |
| H | 27.697 | 3.482  | 32.194 |
| H | 26.201 | 3.636  | 32.366 |
| O | 13.479 | 8.804  | 50.341 |
| H | 13.996 | 9.397  | 49.794 |
| H | 13.905 | 7.953  | 50.239 |
| O | 22.812 | 10.431 | 34.406 |
| H | 23.271 | 10.71  | 35.198 |
| H | 23.492 | 10.031 | 33.864 |
| O | 15.33  | 8.347  | 42.543 |
| H | 15.111 | 9.276  | 42.621 |
| H | 15.97  | 8.193  | 43.238 |
| O | 9.757  | 0.697  | 40.02  |
| H | 9.357  | -0.157 | 39.854 |
| H | 10.699 | 0.53   | 39.988 |
| O | 28.111 | 14.143 | 50.781 |
| H | 27.786 | 14.176 | 51.681 |
| H | 28.078 | 13.215 | 50.549 |
| O | 13.861 | 3.273  | 40.517 |
| H | 13.006 | 2.878  | 40.689 |
| H | 13.881 | 4.052  | 41.072 |
| O | 12.289 | 8.298  | 39.09  |
| H | 12.82  | 8.787  | 38.461 |
| H | 11.81  | 8.971  | 39.573 |
| O | 34.256 | 5.875  | 40.779 |
| H | 34.146 | 5.547  | 39.886 |

|   |        |        |        |
|---|--------|--------|--------|
| H | 34.961 | 6.518  | 40.712 |
| O | 20.84  | 3.717  | 48.634 |
| H | 20.708 | 2.84   | 48.994 |
| H | 20.438 | 3.682  | 47.766 |
| O | 20.51  | 12.365 | 28.823 |
| H | 21.302 | 12.209 | 29.337 |
| H | 20.785 | 12.24  | 27.915 |
| O | 21.064 | 14.309 | 33.096 |
| H | 20.77  | 14.49  | 32.203 |
| H | 20.264 | 14.328 | 33.62  |
| O | 22.937 | 7.564  | 36.141 |
| H | 22.178 | 7.625  | 35.561 |
| H | 23.584 | 7.07   | 35.637 |
| O | 24.607 | 6.008  | 34.239 |
| H | 23.92  | 5.368  | 34.05  |
| H | 24.708 | 6.498  | 33.423 |
| O | 10.122 | 3.333  | 46.224 |
| H | 10.886 | 3.614  | 45.721 |
| H | 10.346 | 2.454  | 46.531 |
| O | 27.045 | -3.492 | 31.205 |
| H | 27.158 | -2.703 | 30.675 |
| H | 27.91  | -3.902 | 31.21  |
| O | 17.064 | 2.442  | 44.664 |
| H | 16.206 | 2.553  | 44.254 |
| H | 17.688 | 2.733  | 43.999 |
| O | 25.036 | -0.562 | 45.377 |
| H | 24.199 | -0.452 | 44.926 |
| H | 25.024 | 0.099  | 46.069 |
| O | 18.487 | -3.031 | 36.441 |
| H | 18.807 | -3.289 | 37.305 |
| H | 19.25  | -2.65  | 36.007 |
| O | 8.32   | -1.017 | 45.277 |
| H | 7.567  | -0.66  | 44.807 |
| H | 8.494  | -0.381 | 45.971 |
| O | 19.737 | 6.748  | 38.277 |
| H | 19.645 | 7.091  | 37.388 |
| H | 20.672 | 6.562  | 38.365 |
| O | 21.397 | 5.56   | 41.347 |
| H | 21.698 | 4.665  | 41.503 |
| H | 21.85  | 5.83   | 40.548 |
| O | 14.884 | 12.067 | 33.211 |
| H | 14.233 | 11.538 | 32.75  |
| H | 15.325 | 11.449 | 33.794 |
| O | 25.011 | 8.035  | 32.589 |
| H | 25.317 | 8.823  | 33.037 |
| H | 24.354 | 8.352  | 31.969 |
| O | 13.288 | 3.472  | 47.095 |

|   |        |        |        |
|---|--------|--------|--------|
| H | 13.809 | 3.134  | 46.367 |
| H | 13.101 | 2.703  | 47.634 |
| O | 14.332 | 6.929  | 35.797 |
| H | 13.379 | 6.926  | 35.709 |
| H | 14.502 | 6.409  | 36.582 |
| O | 20.519 | 3.916  | 33.072 |
| H | 19.624 | 4.119  | 33.345 |
| H | 20.594 | 4.295  | 32.196 |
| O | 13.793 | 2.798  | 44.484 |
| H | 13.21  | 2.099  | 44.188 |
| H | 13.231 | 3.57   | 44.543 |
| O | 17.634 | 0.257  | 53.633 |
| H | 17.851 | -0.054 | 54.512 |
| H | 18.367 | -0.031 | 53.089 |
| O | 19.279 | 15.56  | 45.023 |
| H | 19.907 | 16.276 | 45.126 |
| H | 19.555 | 15.112 | 44.224 |
| O | 20.339 | 4.887  | 30.285 |
| H | 20.586 | 4.694  | 29.38  |
| H | 20.256 | 5.84   | 30.312 |
| O | 26.111 | 2.179  | 41.83  |
| H | 25.217 | 1.852  | 41.725 |
| H | 26.018 | 2.957  | 42.38  |
| O | 25.268 | 8.581  | 40.141 |
| H | 24.603 | 8.107  | 40.641 |
| H | 25.987 | 7.956  | 40.046 |
| O | 19.926 | 7.382  | 27.324 |
| H | 19.403 | 7.822  | 27.994 |
| H | 20.819 | 7.399  | 27.669 |
| O | 13.529 | 0.297  | 35.337 |
| H | 13.494 | 1.25   | 35.422 |
| H | 12.62  | 0.014  | 35.434 |
| O | 9.391  | 1.097  | 35.006 |
| H | 8.551  | 1.004  | 35.456 |
| H | 9.288  | 1.881  | 34.467 |
| O | 20.485 | 7.541  | 30.187 |
| H | 21.261 | 8.029  | 30.465 |
| H | 19.904 | 7.563  | 30.948 |
| O | 24.531 | 8.577  | 44.861 |
| H | 25.068 | 8.955  | 44.165 |
| H | 24.563 | 7.633  | 44.703 |
| O | 21.585 | 10.883 | 41.79  |
| H | 22.132 | 11.578 | 41.425 |
| H | 21.807 | 10.867 | 42.721 |
| O | 26.859 | 6.665  | 31.134 |
| H | 27.064 | 5.813  | 31.518 |
| H | 26.123 | 6.99   | 31.652 |

|   |        |        |        |
|---|--------|--------|--------|
| O | 23.69  | 4.088  | 52.613 |
| H | 22.977 | 3.45   | 52.649 |
| H | 24.407 | 3.674  | 53.093 |
| O | 15.699 | 14.549 | 32.98  |
| H | 15.324 | 13.683 | 33.143 |
| H | 15.186 | 14.899 | 32.252 |
| O | 31.122 | 11.027 | 34.271 |
| H | 30.5   | 11.174 | 34.984 |
| H | 31.847 | 10.555 | 34.681 |
| O | 14.271 | 10.764 | 44.164 |
| H | 13.777 | 10.552 | 44.956 |
| H | 14.857 | 11.473 | 44.429 |
| O | 23.436 | 6.768  | 47.913 |
| H | 23.655 | 6.126  | 48.589 |
| H | 22.98  | 6.262  | 47.241 |
| O | 16.377 | 3.385  | 31.832 |
| H | 16.405 | 4.232  | 31.387 |
| H | 16.483 | 2.743  | 31.13  |
| O | 12.502 | 6.722  | 31.557 |
| H | 12.394 | 6.751  | 30.606 |
| H | 11.61  | 6.641  | 31.896 |
| O | 22.625 | -1.093 | 28.515 |
| H | 23.221 | -1.173 | 29.26  |
| H | 22.057 | -0.357 | 28.741 |
| O | 13.435 | 10.001 | 29.413 |
| H | 12.576 | 9.987  | 28.992 |
| H | 13.65  | 9.078  | 29.55  |
| O | 19.921 | 8.425  | 43.885 |
| H | 20.581 | 9.089  | 43.685 |
| H | 20.167 | 8.095  | 44.749 |
| O | 22.012 | 2.889  | 28.605 |
| H | 22.574 | 2.991  | 27.836 |
| H | 22.562 | 2.438  | 29.245 |
| O | 11.775 | -0.659 | 29.248 |
| H | 11.866 | -1.097 | 28.402 |
| H | 12.568 | -0.13  | 29.33  |
| O | 34.349 | 4.783  | 38.191 |
| H | 35.154 | 5.048  | 37.746 |
| H | 33.803 | 4.412  | 37.497 |
| O | 15.834 | 9.224  | 34.776 |
| H | 15.198 | 8.513  | 34.859 |
| H | 15.532 | 9.888  | 35.396 |
| O | 8.579  | 9.012  | 27.714 |
| H | 8.434  | 8.075  | 27.585 |
| H | 7.871  | 9.287  | 28.296 |
| O | 18.017 | 9.035  | 51.774 |
| H | 18.652 | 8.366  | 52.029 |

|   |        |        |        |
|---|--------|--------|--------|
| H | 18.327 | 9.834  | 52.199 |
| O | 9.908  | 17.531 | 32.41  |
| H | 9.94   | 18.459 | 32.641 |
| H | 10.827 | 17.263 | 32.37  |
| O | 26.8   | 3.535  | 47.16  |
| H | 26.393 | 2.701  | 47.396 |
| H | 27.728 | 3.413  | 47.36  |
| O | 21.487 | 10.849 | 38.021 |
| H | 20.827 | 10.492 | 38.615 |
| H | 21.07  | 10.827 | 37.159 |
| O | 29.435 | 14.32  | 33.628 |
| H | 30.06  | 14.43  | 34.344 |
| H | 28.69  | 14.87  | 33.873 |
| O | 11.455 | 4.273  | 51.047 |
| H | 10.876 | 3.871  | 51.694 |
| H | 11.057 | 4.058  | 50.203 |
| O | 14.852 | 7.907  | 32.067 |
| H | 13.977 | 7.614  | 31.814 |
| H | 14.763 | 8.853  | 32.185 |
| O | 21.111 | 2.951  | 52.492 |
| H | 20.521 | 2.456  | 51.924 |
| H | 20.606 | 3.098  | 53.292 |
| O | 24.673 | 2.954  | 36.754 |
| H | 24.157 | 3.387  | 36.073 |
| H | 24.359 | 3.338  | 37.572 |
| O | 26.192 | 0.814  | 47.6   |
| H | 26.845 | 0.283  | 47.144 |
| H | 26.042 | 0.352  | 48.425 |
| O | 8.827  | 1.553  | 49.439 |
| H | 8.21   | 2.194  | 49.791 |
| H | 9.64   | 2.044  | 49.318 |
| O | 17.472 | 6.243  | 36.687 |
| H | 16.623 | 6.547  | 37.011 |
| H | 17.827 | 5.717  | 37.403 |
| O | 12.092 | 7.628  | 34.45  |
| H | 11.598 | 7.791  | 33.647 |
| H | 11.839 | 8.341  | 35.036 |
| O | 19.358 | 12.995 | 51.515 |
| H | 18.599 | 13.089 | 50.939 |
| H | 19.947 | 13.702 | 51.253 |
| O | 25.79  | -4.27  | 50.836 |
| H | 25.672 | -3.896 | 49.963 |
| H | 26.737 | -4.256 | 50.976 |
| O | 19.018 | 6.686  | 42.135 |
| H | 19.87  | 6.389  | 41.814 |
| H | 19.217 | 7.149  | 42.949 |
| O | 23.649 | 3.726  | 46.605 |

|   |        |        |        |
|---|--------|--------|--------|
| H | 24.449 | 3.241  | 46.404 |
| H | 23.2   | 3.188  | 47.257 |
| O | 24.583 | -3.284 | 44.728 |
| H | 24.707 | -3.149 | 43.788 |
| H | 24.547 | -2.401 | 45.094 |
| O | 20.308 | 13.099 | 39.768 |
| H | 20.916 | 12.401 | 40.014 |
| H | 19.969 | 13.426 | 40.602 |
| O | 20.215 | 17.458 | 39.928 |
| H | 19.459 | 17.523 | 39.343 |
| H | 20.695 | 16.692 | 39.613 |
| O | 25.694 | 10.506 | 33.749 |
| H | 26.475 | 10.547 | 34.302 |
| H | 25.69  | 11.339 | 33.278 |
| O | 13.981 | 5.128  | 33.338 |
| H | 14.249 | 5.586  | 34.134 |
| H | 13.363 | 5.724  | 32.915 |
| O | 10.531 | 6.239  | 38.577 |
| H | 10.994 | 6.99   | 38.949 |
| H | 10.687 | 6.304  | 37.635 |
| O | 18.891 | 7.565  | 32.394 |
| H | 18.182 | 7.552  | 31.751 |
| H | 18.636 | 6.913  | 33.046 |
| O | 18.141 | 3.774  | 41.95  |
| H | 17.275 | 4.163  | 42.078 |
| H | 18.685 | 4.498  | 41.641 |
| O | 31.122 | 5.684  | 32.608 |
| H | 30.295 | 6.14   | 32.456 |
| H | 31.603 | 5.78   | 31.786 |
| O | 29.445 | 7.443  | 31.589 |
| H | 28.601 | 7.491  | 31.14  |
| H | 29.669 | 8.354  | 31.778 |
| O | 37.426 | 4.444  | 33.667 |
| H | 38.054 | 3.802  | 33.998 |
| H | 37.827 | 4.779  | 32.865 |
| O | 15.283 | -1.857 | 32.176 |
| H | 14.718 | -1.087 | 32.242 |
| H | 16.172 | -1.51  | 32.254 |
| O | 31.735 | 12.301 | 37.927 |
| H | 30.91  | 12.037 | 37.52  |
| H | 31.688 | 11.948 | 38.815 |
| O | 23.874 | 7.2    | 42.293 |
| H | 24.299 | 6.344  | 42.267 |
| H | 23.235 | 7.129  | 43.002 |
| O | 29.03  | 4.494  | 28.535 |
| H | 28.318 | 4.576  | 29.17  |
| H | 28.974 | 5.291  | 28.008 |

|   |        |        |        |
|---|--------|--------|--------|
| O | 32.902 | 9.474  | 35.456 |
| H | 33.213 | 8.636  | 35.111 |
| H | 33.406 | 9.604  | 36.259 |
| O | 16.523 | 0.86   | 41.796 |
| H | 16.017 | 0.694  | 41.001 |
| H | 16.91  | 1.725  | 41.656 |
| O | 32.555 | 2.665  | 50.058 |
| H | 32.614 | 1.962  | 50.704 |
| H | 31.629 | 2.907  | 50.051 |
| O | 29.549 | 3.217  | 47.079 |
| H | 29.95  | 4.023  | 46.755 |
| H | 30.156 | 2.524  | 46.816 |
| O | 24.36  | 4.059  | 39.742 |
| H | 23.877 | 3.825  | 40.535 |
| H | 25.267 | 3.825  | 39.937 |
| O | 17.137 | 8.069  | 44.661 |
| H | 18.031 | 8.15   | 44.331 |
| H | 17.155 | 8.507  | 45.512 |
| O | 17.748 | 5.537  | 34.095 |
| H | 17.403 | 5.571  | 34.988 |
| H | 17.145 | 4.959  | 33.627 |
| O | 30.564 | 11.096 | 40.931 |
| H | 30.71  | 11.576 | 41.746 |
| H | 29.934 | 11.631 | 40.447 |
| O | 17.427 | 16.958 | 42.253 |
| H | 17.417 | 16.615 | 43.147 |
| H | 18.251 | 17.441 | 42.191 |
| O | 27.169 | 10.439 | 37.843 |
| H | 26.826 | 10.578 | 38.726 |
| H | 26.652 | 9.712  | 37.497 |
| O | 8.537  | 4.062  | 44.196 |
| H | 9.176  | 4.029  | 44.909 |
| H | 9.006  | 4.479  | 43.474 |
| O | 16.426 | 10.681 | 37.094 |
| H | 17.079 | 11.285 | 36.74  |
| H | 16.576 | 10.693 | 38.039 |
| O | 19.892 | 9.378  | 40.046 |
| H | 20.392 | 9.668  | 40.809 |
| H | 20.017 | 8.43   | 40.023 |
| O | 8.271  | 13.213 | 33.564 |
| H | 7.727  | 13.979 | 33.749 |
| H | 8.203  | 12.675 | 34.353 |
| O | 16.206 | 9.254  | 28.969 |
| H | 16.806 | 9.871  | 29.389 |
| H | 15.372 | 9.721  | 28.93  |
| O | 18.145 | 15.09  | 55.822 |
| H | 18.183 | 14.611 | 56.65  |



|   |        |        |        |
|---|--------|--------|--------|
| H | 18.973 | 14.884 | 55.388 |
| O | 23.331 | 12.998 | 30.289 |
| H | 23.623 | 12.409 | 29.593 |
| H | 23.928 | 12.824 | 31.016 |
| O | 11.512 | 16.092 | 29.43  |
| H | 11.795 | 15.19  | 29.28  |
| H | 10.556 | 16.048 | 29.419 |
| O | 20.315 | 10.769 | 35.54  |
| H | 19.786 | 9.972  | 35.51  |
| H | 21.142 | 10.523 | 35.126 |
| O | 26.877 | 15.804 | 49.111 |
| H | 27.433 | 16.545 | 48.869 |
| H | 27.354 | 15.367 | 49.816 |
| O | 21.235 | 3.758  | 22.64  |
| H | 21.195 | 3.04   | 22.008 |
| H | 20.61  | 3.512  | 23.322 |
| O | 28.373 | -0.741 | 19.421 |
| H | 28.674 | 0.057  | 19.856 |
| H | 28.119 | -0.454 | 18.544 |
| O | 10.977 | -3.25  | 23.891 |
| H | 10.139 | -2.863 | 23.638 |
| H | 11.595 | -2.935 | 23.232 |
| O | 25.985 | 6.309  | 14.138 |
| H | 26.204 | 5.959  | 15.002 |
| H | 26.609 | 5.889  | 13.545 |
| O | 12.922 | 7.714  | 19.022 |
| H | 13.824 | 8.031  | 19.057 |
| H | 12.558 | 8.114  | 18.232 |
| O | 19.732 | 0.973  | 25.443 |
| H | 19.728 | 1.724  | 24.85  |
| H | 18.881 | 0.556  | 25.308 |
| O | 21.926 | 11.039 | 21.593 |
| H | 21.493 | 11.807 | 21.964 |
| H | 22.315 | 11.354 | 20.777 |
| O | 26.263 | 4.794  | 26.495 |
| H | 27.141 | 5.111  | 26.285 |
| H | 26.378 | 4.285  | 27.298 |
| O | 25.924 | 12.915 | 19.413 |
| H | 26.569 | 12.693 | 20.084 |
| H | 25.935 | 13.872 | 19.378 |
| O | 20.698 | 7.927  | 23.611 |
| H | 21.65  | 7.859  | 23.533 |
| H | 20.505 | 7.582  | 24.483 |
| O | 15.491 | 5.379  | 24.029 |
| H | 14.715 | 5.775  | 23.633 |
| H | 15.939 | 4.949  | 23.3   |
| O | 13.83  | 11.673 | 9.491  |

|   |        |        |        |
|---|--------|--------|--------|
| H | 13.978 | 11.051 | 10.203 |
| H | 12.947 | 12.009 | 9.647  |
| O | 26.432 | 7.776  | 28.649 |
| H | 26.351 | 7.11   | 29.332 |
| H | 27.268 | 7.583  | 28.225 |
| O | 28.437 | 13.639 | 20.895 |
| H | 28.353 | 13.923 | 21.806 |
| H | 29.344 | 13.34  | 20.82  |
| O | 32.72  | 1.817  | 19.041 |
| H | 32.923 | 1.168  | 19.715 |
| H | 31.971 | 1.448  | 18.572 |
| O | 23.772 | 3.798  | 26.257 |
| H | 24.641 | 4.172  | 26.112 |
| H | 23.763 | 3.001  | 25.727 |
| O | 26.264 | 3.215  | 12.822 |
| H | 26.051 | 2.364  | 13.205 |
| H | 27.135 | 3.419  | 13.163 |
| O | 31.501 | 2.986  | 29.186 |
| H | 30.575 | 3.215  | 29.257 |
| H | 31.949 | 3.825  | 29.078 |
| O | 22.865 | 2.303  | 20.081 |
| H | 23.547 | 2.853  | 20.466 |
| H | 22.549 | 2.804  | 19.328 |
| O | 21.622 | 3.431  | 11.48  |
| H | 22.256 | 4.133  | 11.627 |
| H | 20.782 | 3.882  | 11.396 |
| O | 21.221 | 1.873  | 16.445 |
| H | 21.129 | 2.459  | 17.196 |
| H | 20.392 | 1.395  | 16.411 |
| O | 26.969 | 11.193 | 28.314 |
| H | 26.574 | 11.149 | 27.443 |
| H | 27.081 | 10.278 | 28.573 |
| O | 23.415 | 10.986 | 28.38  |
| H | 22.609 | 10.965 | 27.864 |
| H | 24.109 | 10.793 | 27.749 |
| O | 27.051 | 5.453  | 16.359 |
| H | 27.999 | 5.527  | 16.255 |
| H | 26.934 | 4.763  | 17.012 |
| O | 13.853 | 2.913  | 24.95  |
| H | 13.721 | 2.639  | 25.858 |
| H | 14.456 | 3.654  | 25.009 |
| O | 24.956 | 3.119  | 22.11  |
| H | 24.438 | 3.098  | 22.915 |
| H | 25.213 | 2.208  | 21.968 |
| O | 12.552 | 12.201 | 25.925 |
| H | 13.395 | 12.509 | 26.259 |
| H | 12.183 | 11.686 | 26.642 |

|   |        |        |        |
|---|--------|--------|--------|
| O | 17.899 | 7.124  | 14.883 |
| H | 17.89  | 7.1    | 15.84  |
| H | 17.714 | 6.222  | 14.619 |
| O | 28.769 | -0.582 | 26.884 |
| H | 28.731 | 0.371  | 26.811 |
| H | 29.695 | -0.795 | 26.765 |
| O | 11.653 | -1.746 | 21.584 |
| H | 10.856 | -1.783 | 21.056 |
| H | 12.239 | -1.17  | 21.093 |
| O | 15.555 | 7.22   | 17.854 |
| H | 15.327 | 6.515  | 17.248 |
| H | 16.512 | 7.218  | 17.875 |
| O | 33.728 | 5.156  | 31.017 |
| H | 34.502 | 5.03   | 30.468 |
| H | 33.174 | 5.756  | 30.518 |
| O | 17.844 | 12.643 | 20.716 |
| H | 17.311 | 11.949 | 21.103 |
| H | 17.705 | 12.555 | 19.773 |
| O | 24.163 | 8.497  | 18.931 |
| H | 24.776 | 9.145  | 18.584 |
| H | 24.474 | 7.662  | 18.58  |
| O | 16.03  | 13.938 | 14.872 |
| H | 16.394 | 13.957 | 15.758 |
| H | 15.453 | 14.701 | 14.834 |
| O | 21.949 | 14.702 | 20.033 |
| H | 21.223 | 14.987 | 20.589 |
| H | 22.45  | 15.5   | 19.867 |
| O | 21.844 | 9.784  | 17.838 |
| H | 22.053 | 10.549 | 18.374 |
| H | 22.606 | 9.213  | 17.929 |
| O | 13.018 | 6.102  | 22.892 |
| H | 12.235 | 5.579  | 23.064 |
| H | 13.401 | 5.709  | 22.107 |
| O | 21.408 | 1.015  | 12.983 |
| H | 21.71  | 1.856  | 12.639 |
| H | 21.076 | 0.549  | 12.215 |
| O | 17.221 | 6.871  | 28.228 |
| H | 16.82  | 7.702  | 28.482 |
| H | 17.072 | 6.811  | 27.285 |
| O | 29.951 | -2.968 | 22.781 |
| H | 29.54  | -3.767 | 22.451 |
| H | 29.376 | -2.677 | 23.488 |
| O | 7.146  | 3.594  | 10.701 |
| H | 6.733  | 3.554  | 11.564 |
| H | 6.943  | 4.472  | 10.379 |
| O | 14.637 | -1.255 | 27.219 |
| H | 13.869 | -1.757 | 26.945 |

|   |        |        |        |
|---|--------|--------|--------|
| H | 14.289 | -0.394 | 27.452 |
| O | 25.82  | 0.668  | 21.759 |
| H | 25.323 | 0.44   | 20.973 |
| H | 26.261 | -0.144 | 22.007 |
| O | 20.559 | -4.37  | 28.572 |
| H | 20.162 | -4.496 | 27.71  |
| H | 21.392 | -3.935 | 28.39  |
| O | 12.51  | 8.266  | 12.064 |
| H | 11.591 | 8.434  | 11.853 |
| H | 12.949 | 9.101  | 11.902 |
| O | 27.92  | 6.493  | 19.198 |
| H | 28.752 | 6.03   | 19.295 |
| H | 27.649 | 6.311  | 18.298 |
| O | 17.044 | 4.239  | 21.966 |
| H | 17.387 | 5.127  | 21.867 |
| H | 17.497 | 3.731  | 21.292 |
| O | 21.41  | 7.236  | 18.141 |
| H | 21.244 | 8.091  | 17.743 |
| H | 21.185 | 7.354  | 19.064 |
| O | 25.34  | -2.921 | 17.93  |
| H | 24.995 | -2.03  | 17.986 |
| H | 25.499 | -3.057 | 16.996 |
| O | 13.388 | 1.677  | 27.6   |
| H | 14.037 | 1.782  | 28.296 |
| H | 12.575 | 2.012  | 27.977 |
| O | 23.922 | -4.824 | 37.78  |
| H | 24.13  | -4.476 | 36.912 |
| H | 23.372 | -5.588 | 37.606 |
| O | 18.809 | 2.748  | 23.603 |
| H | 18.116 | 3.39   | 23.451 |
| H | 19.038 | 2.432  | 22.729 |
| O | 27.361 | -3.031 | 7.368  |
| H | 28.171 | -2.733 | 7.783  |
| H | 27.626 | -3.288 | 6.485  |
| O | 28.413 | 2.197  | 27.157 |
| H | 28.617 | 3.044  | 27.554 |
| H | 27.729 | 1.83   | 27.717 |
| O | 28.065 | 8.376  | 15.098 |
| H | 27.109 | 8.357  | 15.112 |
| H | 28.294 | 8.291  | 14.173 |
| O | 26.457 | -1.868 | 22.715 |
| H | 25.958 | -2.268 | 23.427 |
| H | 26.658 | -2.594 | 22.125 |
| O | 27.288 | 0.283  | 17.096 |
| H | 27.517 | 1.07   | 16.602 |
| H | 26.332 | 0.244  | 17.055 |
| O | 5.992  | 4.065  | 13.015 |

|   |        |        |        |
|---|--------|--------|--------|
| H | 5.991  | 5.019  | 12.94  |
| H | 5.51   | 3.887  | 13.822 |
| O | 21.304 | -0.751 | 17.969 |
| H | 20.986 | -1.654 | 17.945 |
| H | 21.717 | -0.62  | 17.115 |
| O | 19.227 | 9.084  | 21.368 |
| H | 19.645 | 8.837  | 22.193 |
| H | 19.871 | 8.859  | 20.696 |
| O | 24.49  | 7.892  | 26.544 |
| H | 25.207 | 8.032  | 27.162 |
| H | 23.78  | 7.534  | 27.078 |
| O | 26.712 | 9.304  | 11.995 |
| H | 26.434 | 9.432  | 11.089 |
| H | 25.906 | 9.094  | 12.466 |
| O | 22.899 | 10.889 | 24.206 |
| H | 23.036 | 9.943  | 24.163 |
| H | 22.738 | 11.149 | 23.299 |
| O | 14.348 | 9.848  | 15.108 |
| H | 14.869 | 9.327  | 14.496 |
| H | 14.955 | 10.062 | 15.816 |
| O | 17.564 | 1.245  | 13.851 |
| H | 16.832 | 1.568  | 13.325 |
| H | 18.191 | 1.969  | 13.858 |
| O | 14.396 | 9.234  | 25.226 |
| H | 13.804 | 8.686  | 25.742 |
| H | 13.997 | 9.264  | 24.357 |
| O | 26.239 | 3.987  | 29.056 |
| H | 26.65  | 3.986  | 29.92  |
| H | 25.414 | 4.456  | 29.184 |
| O | 26.117 | 4.004  | 18.848 |
| H | 25.93  | 3.971  | 19.786 |
| H | 26.868 | 3.422  | 18.733 |
| O | 7.887  | -1.502 | 22.508 |
| H | 8.355  | -1.074 | 21.791 |
| H | 6.962  | -1.358 | 22.31  |
| O | 21.939 | 8.064  | 14.22  |
| H | 21.04  | 8.233  | 13.939 |
| H | 21.894 | 7.223  | 14.675 |
| O | 17.921 | 12.331 | 13.748 |
| H | 17.303 | 12.708 | 14.374 |
| H | 18.577 | 11.895 | 14.292 |
| O | 24.584 | -0.287 | 17.622 |
| H | 23.831 | -0.24  | 17.033 |
| H | 24.21  | -0.18  | 18.497 |
| O | 15.735 | 5.057  | 13.272 |
| H | 15.45  | 5.727  | 12.65  |
| H | 15.299 | 4.257  | 12.978 |

|   |        |        |        |
|---|--------|--------|--------|
| O | 9.585  | -3.528 | 18.648 |
| H | 8.674  | -3.523 | 18.355 |
| H | 9.756  | -4.44  | 18.882 |
| O | 35.961 | 10.881 | 18.917 |
| H | 35.222 | 10.305 | 18.721 |
| H | 35.589 | 11.763 | 18.901 |
| O | 14.052 | 13.918 | 18.213 |
| H | 14.218 | 14.85  | 18.355 |
| H | 14.008 | 13.546 | 19.094 |
| O | 12.623 | 14.544 | 16.1   |
| H | 12.332 | 13.705 | 15.744 |
| H | 13.118 | 14.313 | 16.885 |
| O | 14.978 | 14.159 | 26.71  |
| H | 15.388 | 13.298 | 26.788 |
| H | 14.228 | 14.122 | 27.304 |
| O | 11.427 | 6.244  | 9.331  |
| H | 10.949 | 5.979  | 10.117 |
| H | 12.184 | 5.659  | 9.302  |
| O | 15.805 | 3.755  | 28.607 |
| H | 16.612 | 3.254  | 28.727 |
| H | 16.03  | 4.419  | 27.955 |
| O | 28.201 | 9.912  | 34.611 |
| H | 27.981 | 9.249  | 33.956 |
| H | 28.554 | 9.414  | 35.348 |
| O | 34.79  | 4.674  | 12.49  |
| H | 34.522 | 3.838  | 12.873 |
| H | 33.969 | 5.142  | 12.338 |
| O | 17.622 | -3.922 | 29.356 |
| H | 17.687 | -3.058 | 28.949 |
| H | 18.529 | -4.215 | 29.44  |
| O | 15.978 | 8.534  | 13.5   |
| H | 15.753 | 7.889  | 12.829 |
| H | 16.819 | 8.235  | 13.846 |
| O | 10.176 | 8.624  | 32.335 |
| H | 9.745  | 8.107  | 33.015 |
| H | 9.881  | 9.521  | 32.492 |
| O | 21.267 | -9.491 | 17.829 |
| H | 20.662 | -9.231 | 17.134 |
| H | 21.524 | -8.668 | 18.244 |
| O | 36.269 | 4.061  | 18.697 |
| H | 35.404 | 4.471  | 18.713 |
| H | 36.867 | 4.773  | 18.471 |
| O | 18.308 | 2.863  | 29.235 |
| H | 19.253 | 2.709  | 29.251 |
| H | 18.221 | 3.812  | 29.146 |
| O | 14.653 | 2.53   | 16.523 |
| H | 14.997 | 3.423  | 16.539 |

|   |        |        |        |
|---|--------|--------|--------|
| H | 13.71  | 2.634  | 16.645 |
| O | 20.339 | 5.949  | 21.136 |
| H | 20.674 | 5.238  | 21.683 |
| H | 20.984 | 6.649  | 21.232 |
| O | 22.735 | -3.276 | 26.996 |
| H | 22.681 | -2.367 | 27.292 |
| H | 23.503 | -3.629 | 27.445 |
| O | 25.084 | -2.834 | 24.98  |
| H | 24.744 | -2.733 | 25.869 |
| H | 24.644 | -3.615 | 24.643 |
| O | 17.281 | 6.696  | 25.532 |
| H | 16.839 | 7.337  | 24.975 |
| H | 16.896 | 5.856  | 25.282 |
| O | 20.418 | 3.773  | 18.902 |
| H | 20.565 | 4.423  | 19.589 |
| H | 20.315 | 4.288  | 18.102 |
| O | 24.315 | 0.711  | 27.218 |
| H | 23.73  | 1.018  | 26.526 |
| H | 23.919 | -0.106 | 27.521 |
| O | 15.227 | 11.401 | 26.954 |
| H | 15.165 | 10.709 | 26.296 |
| H | 16.041 | 11.214 | 27.422 |
| O | 21.279 | 11.452 | 26.453 |
| H | 20.488 | 10.937 | 26.295 |
| H | 21.728 | 11.468 | 25.608 |
| O | 22.651 | 12.091 | 11.708 |
| H | 22.665 | 12.907 | 12.207 |
| H | 22.25  | 12.328 | 10.872 |
| O | 21.783 | 3.548  | 6.709  |
| H | 22.569 | 3.605  | 7.253  |
| H | 22.031 | 2.966  | 5.99   |
| O | 11.215 | 4.087  | 13.888 |
| H | 11.304 | 3.204  | 13.531 |
| H | 10.27  | 4.235  | 13.93  |
| O | 17.726 | 13.811 | 17.087 |
| H | 18.178 | 14.584 | 17.424 |
| H | 18.427 | 13.252 | 16.751 |
| O | 11.985 | 2.9    | 16.979 |
| H | 11.895 | 3.526  | 17.697 |
| H | 11.996 | 3.441  | 16.19  |
| O | 28.297 | 12.464 | 30.443 |
| H | 27.831 | 11.891 | 29.834 |
| H | 28.927 | 12.932 | 29.895 |
| O | 24.85  | 8.253  | 15.553 |
| H | 23.933 | 8.337  | 15.291 |
| H | 25.249 | 7.724  | 14.862 |
| O | 31.934 | 1.033  | 12.25  |

|   |        |        |        |
|---|--------|--------|--------|
| H | 31.709 | 0.182  | 11.874 |
| H | 31.273 | 1.631  | 11.901 |
| O | 13.038 | 0.235  | 20.339 |
| H | 13.835 | 0.765  | 20.346 |
| H | 12.953 | -0.057 | 19.431 |
| O | 29.599 | 5.671  | 22.622 |
| H | 30.254 | 6.354  | 22.762 |
| H | 28.764 | 6.139  | 22.609 |
| O | 25.224 | 2.427  | 33.67  |
| H | 25.507 | 1.519  | 33.775 |
| H | 24.387 | 2.472  | 34.134 |
| O | 25.758 | -2.611 | 11.073 |
| H | 26.098 | -3.47  | 10.823 |
| H | 26.493 | -2.179 | 11.508 |
| O | 31.901 | -0.917 | 16.206 |
| H | 32.798 | -1.037 | 15.892 |
| H | 31.377 | -0.833 | 15.41  |
| O | 13.821 | 0.271  | 32.589 |
| H | 12.927 | 0.578  | 32.741 |
| H | 14.275 | 0.435  | 33.415 |
| O | 27.462 | 3.011  | 23.569 |
| H | 26.685 | 2.508  | 23.324 |
| H | 27.133 | 3.683  | 24.167 |
| O | 27.235 | 6.732  | 22.01  |
| H | 27.634 | 7.177  | 21.261 |
| H | 26.5   | 6.247  | 21.636 |
| O | 24.788 | 5.816  | 21.742 |
| H | 24.293 | 6.134  | 22.497 |
| H | 24.685 | 4.865  | 21.771 |
| O | 11.857 | 7.353  | 26.401 |
| H | 11.157 | 7.937  | 26.108 |
| H | 11.519 | 6.473  | 26.234 |
| O | 19.317 | 9.512  | 25.827 |
| H | 18.626 | 9.096  | 25.31  |
| H | 19.621 | 8.823  | 26.418 |
| O | 28.799 | 7.383  | 35.365 |
| H | 29.074 | 6.972  | 34.545 |
| H | 29.527 | 7.228  | 35.966 |
| O | 12.92  | 6.894  | 28.936 |
| H | 13.313 | 6.042  | 28.747 |
| H | 12.474 | 7.138  | 28.125 |
| O | 31.014 | 12.541 | 21.487 |
| H | 31.07  | 12.733 | 22.423 |
| H | 31.92  | 12.388 | 21.219 |
| O | 24.065 | 1.397  | 24.365 |
| H | 24.8   | 0.815  | 24.558 |
| H | 23.469 | 0.864  | 23.839 |



|   |        |        |        |
|---|--------|--------|--------|
| O | 17.857 | 6.659  | 21.413 |
| H | 17.868 | 7.615  | 21.46  |
| H | 18.777 | 6.405  | 21.486 |
| O | 22.516 | 9.224  | 30.716 |
| H | 22.801 | 9.851  | 30.052 |
| H | 21.983 | 9.742  | 31.321 |
| O | 16.054 | 18.929 | 20.6   |
| H | 15.371 | 18.263 | 20.674 |
| H | 16.018 | 19.209 | 19.685 |
| O | 11.969 | 8.645  | 16.363 |
| H | 12.256 | 7.804  | 16.008 |
| H | 12.106 | 9.266  | 15.648 |
| O | 18.41  | 12.754 | 25.362 |
| H | 19.128 | 12.348 | 24.876 |
| H | 17.831 | 13.106 | 24.686 |
| O | 23.636 | 4.103  | 17.885 |
| H | 23.886 | 3.403  | 17.281 |
| H | 24.417 | 4.25   | 18.418 |
| O | 24.447 | 10.915 | 16.444 |
| H | 24.832 | 10.08  | 16.175 |
| H | 23.53  | 10.852 | 16.178 |
| O | 16.072 | 11.658 | 17.111 |
| H | 16.832 | 12.19  | 16.877 |
| H | 15.428 | 12.288 | 17.434 |
| O | 34.014 | 8.388  | 31.98  |
| H | 33.382 | 7.998  | 32.584 |
| H | 33.675 | 8.179  | 31.11  |
| O | 21.068 | -8.026 | -4.152 |
| H | 21.194 | -8.471 | -3.314 |
| H | 21.861 | -7.501 | -4.265 |
| O | 21.457 | 6.812  | -1.771 |
| H | 20.849 | 7.408  | -1.334 |
| H | 20.956 | 6.456  | -2.506 |
| O | 23.993 | -3.256 | 1.628  |
| H | 23.474 | -3.251 | 0.824  |
| H | 23.38  | -3.54  | 2.306  |
| O | 24.754 | 3.276  | -3.106 |
| H | 24.982 | 2.547  | -2.529 |
| H | 23.806 | 3.369  | -3.013 |
| O | 13.833 | 9.264  | 4.013  |
| H | 13.653 | 9.622  | 4.882  |
| H | 12.997 | 8.892  | 3.73   |
| O | 13.866 | -4.772 | 9.236  |
| H | 14.719 | -4.472 | 9.551  |
| H | 13.345 | -4.884 | 10.031 |
| O | 20.829 | 5.862  | 1.889  |
| H | 19.995 | 6.22   | 1.586  |

|   |        |        |        |
|---|--------|--------|--------|
| H | 20.778 | 4.928  | 1.684  |
| O | 18.197 | 7.789  | 7.786  |
| H | 18.84  | 7.23   | 7.351  |
| H | 18.714 | 8.504  | 8.159  |
| O | 19.72  | 12.729 | -1.956 |
| H | 19.002 | 12.104 | -2.063 |
| H | 19.4   | 13.352 | -1.303 |
| O | 14.504 | 13.584 | 3.429  |
| H | 14.608 | 13.405 | 2.494  |
| H | 14.226 | 14.5   | 3.468  |
| O | 31.055 | 7.489  | 12.192 |
| H | 31.191 | 7.849  | 11.316 |
| H | 30.105 | 7.399  | 12.269 |
| O | 19.904 | 9.797  | 9.309  |
| H | 19.37  | 10.311 | 8.703  |
| H | 19.7   | 10.156 | 10.172 |
| O | 25.175 | -1.062 | 7.261  |
| H | 24.427 | -1.386 | 7.764  |
| H | 25.904 | -1.621 | 7.529  |
| O | 27.983 | 3.17   | 9.403  |
| H | 28.785 | 3.591  | 9.094  |
| H | 27.307 | 3.465  | 8.792  |
| O | 13.493 | 3.781  | 0.834  |
| H | 13.543 | 3.6    | -0.104 |
| H | 13.591 | 4.731  | 0.9    |
| O | 18.753 | 2.588  | -0.553 |
| H | 18.834 | 2.653  | -1.505 |
| H | 18.063 | 1.939  | -0.414 |
| O | 25.788 | 7.473  | 3.902  |
| H | 24.874 | 7.282  | 3.69   |
| H | 26.017 | 8.208  | 3.333  |
| O | 14.569 | 1.08   | 9.308  |
| H | 14.965 | 0.269  | 9.628  |
| H | 15.147 | 1.365  | 8.6    |
| O | 18.899 | 0.96   | 3.288  |
| H | 18.207 | 1.601  | 3.128  |
| H | 18.494 | 0.307  | 3.859  |
| O | 22.787 | 6.233  | 10.579 |
| H | 22.071 | 6.833  | 10.784 |
| H | 23.182 | 6.033  | 11.428 |
| O | 33.448 | 8.903  | 18.686 |
| H | 33.69  | 8.383  | 17.92  |
| H | 32.898 | 9.604  | 18.336 |
| O | 16.46  | 4.04   | -0.677 |
| H | 15.859 | 3.38   | -0.334 |
| H | 17.332 | 3.69   | -0.491 |
| O | 23.205 | 3.075  | 9.059  |

|   |        |        |        |
|---|--------|--------|--------|
| H | 23.63  | 2.25   | 9.292  |
| H | 22.676 | 3.297  | 9.825  |
| O | 30.447 | 2.149  | 14.429 |
| H | 29.692 | 1.789  | 13.962 |
| H | 31.142 | 2.179  | 13.772 |
| O | 12.779 | 0.098  | 17.596 |
| H | 13.111 | 0.989  | 17.706 |
| H | 12.859 | -0.073 | 16.658 |
| O | 15.502 | 2.187  | 12.399 |
| H | 14.869 | 1.566  | 12.039 |
| H | 16.191 | 2.239  | 11.736 |
| O | 26.02  | -1.416 | 4.645  |
| H | 25.862 | -0.6   | 4.17   |
| H | 25.773 | -1.219 | 5.548  |
| O | 19.393 | 4.671  | 7.613  |
| H | 20.211 | 4.195  | 7.466  |
| H | 18.714 | 3.997  | 7.576  |
| O | 16.916 | 6.69   | -1.191 |
| H | 16.084 | 7.114  | -1.403 |
| H | 16.675 | 5.793  | -0.958 |
| O | 14.923 | 7.148  | 11.45  |
| H | 15.173 | 7.349  | 10.548 |
| H | 14.031 | 7.486  | 11.533 |
| O | 31.818 | -1.892 | 9.011  |
| H | 30.992 | -1.579 | 8.643  |
| H | 32.274 | -1.097 | 9.286  |
| O | 27.769 | 7.615  | 8.884  |
| H | 26.909 | 7.995  | 9.064  |
| H | 27.628 | 6.67   | 8.93   |
| O | 18.177 | 6.117  | 1.18   |
| H | 17.834 | 6.735  | 1.826  |
| H | 17.646 | 6.269  | 0.398  |
| O | 11.867 | 0.652  | 8.877  |
| H | 11.697 | 0.115  | 9.651  |
| H | 12.768 | 0.955  | 8.989  |
| O | 19.438 | 4.974  | 10.809 |
| H | 19.828 | 5.847  | 10.764 |
| H | 18.897 | 4.912  | 10.022 |
| O | 25.071 | 1.046  | 10.684 |
| H | 25.847 | 0.547  | 10.426 |
| H | 25.418 | 1.879  | 11.002 |
| O | 23.579 | 7.206  | 8.14   |
| H | 23.758 | 8.07   | 8.512  |
| H | 23.502 | 6.629  | 8.901  |
| O | 23.925 | 1.59   | 6.229  |
| H | 24.464 | 1.162  | 6.894  |
| H | 24.541 | 2.123  | 5.727  |

|   |        |        |        |
|---|--------|--------|--------|
| O | 30.319 | 4.112  | 8.687  |
| H | 30.826 | 4.884  | 8.435  |
| H | 30.769 | 3.382  | 8.262  |
| O | 20.416 | 7.383  | 10.801 |
| H | 20.077 | 7.996  | 10.148 |
| H | 20.143 | 7.753  | 11.641 |
| O | 26.887 | 13.168 | 12.932 |
| H | 26.472 | 12.702 | 13.658 |
| H | 27.784 | 13.323 | 13.228 |
| O | 9.296  | 6.518  | 7.784  |
| H | 10.003 | 6.477  | 8.428  |
| H | 8.514  | 6.253  | 8.268  |
| O | 23.447 | 5.271  | 13.369 |
| H | 23.172 | 5.347  | 14.283 |
| H | 24.322 | 5.658  | 13.349 |
| O | 24.905 | -7.042 | 3.795  |
| H | 24.636 | -6.994 | 4.712  |
| H | 24.168 | -6.672 | 3.309  |
| O | 23.898 | 4.452  | 3.766  |
| H | 24.109 | 4.97   | 4.543  |
| H | 23.702 | 5.102  | 3.091  |
| O | 15.369 | 10.349 | 1.689  |
| H | 14.639 | 9.925  | 2.141  |
| H | 15.031 | 11.211 | 1.447  |
| O | 17.731 | 2.746  | 19.938 |
| H | 18.138 | 1.905  | 19.726 |
| H | 16.81  | 2.633  | 19.703 |
| O | 20.053 | 4.766  | 16.042 |
| H | 19.805 | 5.122  | 15.189 |
| H | 20.823 | 4.227  | 15.862 |
| O | 22.679 | 5.989  | 16.082 |
| H | 23.141 | 5.309  | 16.573 |
| H | 22.119 | 6.414  | 16.731 |
| O | 11.611 | 7.363  | 2.599  |
| H | 10.724 | 7.484  | 2.261  |
| H | 11.486 | 6.964  | 3.46   |
| O | 15.722 | 5.662  | 4.868  |
| H | 15.288 | 5.929  | 5.679  |
| H | 16.639 | 5.54   | 5.117  |
| O | 27.269 | 5.31   | 11.03  |
| H | 27.855 | 4.713  | 10.565 |
| H | 26.706 | 4.735  | 11.549 |
| O | 15.814 | 8.47   | 8.918  |
| H | 15.951 | 9.409  | 9.044  |
| H | 16.648 | 8.151  | 8.573  |
| O | 20.138 | 3.109  | 1.553  |
| H | 19.564 | 2.9    | 2.29   |

|   |        |        |        |
|---|--------|--------|--------|
| H | 19.659 | 2.804  | 0.782  |
| O | 32.527 | 5.313  | 11.336 |
| H | 31.893 | 5.734  | 11.916 |
| H | 32.317 | 5.651  | 10.465 |
| O | 22.015 | 2.128  | 3.208  |
| H | 22.613 | 2.782  | 3.57   |
| H | 21.424 | 2.628  | 2.646  |
| O | 15.631 | 1.172  | 6.592  |
| H | 15.756 | 0.448  | 5.978  |
| H | 14.906 | 1.677  | 6.223  |
| O | 13.524 | -0.052 | 2.901  |
| H | 14.078 | -0.564 | 3.49   |
| H | 14.093 | 0.649  | 2.585  |
| O | 16.478 | 7.305  | 2.712  |
| H | 16.087 | 7.053  | 3.548  |
| H | 15.739 | 7.341  | 2.103  |
| O | 19.546 | 10.002 | 5.249  |
| H | 19.395 | 9.597  | 4.395  |
| H | 19.355 | 9.308  | 5.88   |
| O | 14.839 | 8.605  | -1.77  |
| H | 14.171 | 8.504  | -2.448 |
| H | 15.213 | 9.471  | -1.93  |
| O | 16.849 | 12.694 | 4.599  |
| H | 16.914 | 12.918 | 5.527  |
| H | 16.11  | 13.212 | 4.279  |
| O | 30.063 | 2.882  | 1.728  |
| H | 30.438 | 2.645  | 2.577  |
| H | 29.209 | 3.259  | 1.941  |
| O | 6.491  | 2.391  | 7.092  |
| H | 6.146  | 1.632  | 7.563  |
| H | 6.153  | 2.294  | 6.202  |
| O | 23.262 | 7.45   | 2.636  |
| H | 22.4   | 7.038  | 2.706  |
| H | 23.498 | 7.356  | 1.713  |
| O | 27.95  | 6.063  | 3.937  |
| H | 27.112 | 6.521  | 4.008  |
| H | 27.813 | 5.419  | 3.243  |
| O | 13.529 | 5.096  | 3.529  |
| H | 13.273 | 5.832  | 2.972  |
| H | 14.392 | 5.338  | 3.865  |
| O | 27.635 | 0.488  | 7.015  |
| H | 28.267 | 1.102  | 6.642  |
| H | 26.936 | 0.437  | 6.363  |
| O | 29.863 | 4.756  | 5.49   |
| H | 29.092 | 5.113  | 5.049  |
| H | 30.081 | 5.408  | 6.156  |
| O | 15.064 | 14.038 | 8.65   |

|   |        |        |        |
|---|--------|--------|--------|
| H | 14.392 | 13.356 | 8.641  |
| H | 15.485 | 13.948 | 9.505  |
| O | 10.954 | 12.35  | 4.302  |
| H | 11.747 | 12.618 | 4.766  |
| H | 11.236 | 11.624 | 3.745  |
| O | 31.957 | 10.727 | 10.484 |
| H | 31.559 | 10.352 | 9.698  |
| H | 31.222 | 10.871 | 11.08  |
| O | 16.274 | 13.752 | 11.158 |
| H | 16.665 | 14.585 | 11.421 |
| H | 15.769 | 13.473 | 11.922 |
| O | 25.76  | 9.778  | 9.309  |
| H | 24.816 | 9.814  | 9.467  |
| H | 25.85  | 9.917  | 8.367  |
| O | 16.797 | 11.071 | 9.389  |
| H | 16.893 | 11.224 | 8.449  |
| H | 16.173 | 11.738 | 9.677  |
| O | 14.082 | 7      | 0.947  |
| H | 14.301 | 7.607  | 0.24   |
| H | 13.17  | 7.2    | 1.16   |
| O | 14.949 | 6.433  | 7.345  |
| H | 14.701 | 5.699  | 7.907  |
| H | 15.221 | 7.12   | 7.954  |
| O | 20.896 | 7.285  | 6.482  |
| H | 20.985 | 6.557  | 7.097  |
| H | 21.772 | 7.668  | 6.436  |
| O | 22.255 | 11.226 | 14.886 |
| H | 21.877 | 11.943 | 14.378 |
| H | 22.061 | 10.441 | 14.374 |
| O | 1.684  | 52.712 | 54.405 |
| H | 2.177  | 53.298 | 54.98  |
| H | 1.192  | 53.298 | 53.83  |
| O | 7.029  | 55.051 | 61.211 |
| H | 7.293  | 55.327 | 60.333 |
| H | 7.546  | 55.601 | 61.8   |
| O | 1.396  | 52.531 | 59.305 |
| H | 0.623  | 52.085 | 58.957 |
| H | 1.047  | 53.302 | 59.751 |
| O | 15.915 | 45.599 | 51     |
| H | 15.763 | 46.537 | 50.884 |
| H | 15.052 | 45.201 | 50.886 |
| O | 4.152  | 52.714 | 58.213 |
| H | 3.793  | 53.293 | 57.541 |
| H | 3.388  | 52.263 | 58.574 |
| O | 13.412 | 53.765 | 61.882 |
| H | 13.019 | 52.986 | 61.488 |
| H | 14.337 | 53.543 | 61.982 |

|   |        |        |        |
|---|--------|--------|--------|
| O | 1.176  | 45.358 | 56.222 |
| H | 0.428  | 45.385 | 56.819 |
| H | 1.271  | 46.261 | 55.917 |
| O | 4.685  | 47.079 | 59.016 |
| H | 3.971  | 47.623 | 59.348 |
| H | 4.826  | 47.39  | 58.121 |
| O | 0.843  | 54.818 | 52.739 |
| H | 0.265  | 54.594 | 52.009 |
| H | 1.436  | 55.48  | 52.381 |
| O | 10.894 | 48.604 | 54.427 |
| H | 10.886 | 48.762 | 53.483 |
| H | 11.115 | 47.677 | 54.513 |
| O | 5.075  | 55.335 | 45.971 |
| H | 5.551  | 55.937 | 46.544 |
| H | 4.154  | 55.468 | 46.196 |
| O | 6.364  | 53.43  | 47.349 |
| H | 6.003  | 54.066 | 46.732 |
| H | 5.614  | 53.158 | 47.879 |
| O | -3.926 | 47.579 | 52.504 |
| H | -4.665 | 46.998 | 52.685 |
| H | -3.231 | 47.268 | 53.084 |
| O | 0.745  | 47.836 | 55.158 |
| H | 1.428  | 48.505 | 55.127 |
| H | 0.127  | 48.093 | 54.474 |
| O | 10.478 | 57.701 | 58.529 |
| H | 10.748 | 56.825 | 58.255 |
| H | 10.845 | 57.801 | 59.407 |
| O | 5.688  | 44.293 | 56.225 |
| H | 5.901  | 45.216 | 56.089 |
| H | 6.321  | 43.995 | 56.878 |
| O | 6.715  | 47.247 | 56.122 |
| H | 6.888  | 47.367 | 55.188 |
| H | 7.247  | 47.917 | 56.552 |
| O | 6.462  | 46.125 | 60.681 |
| H | 6.6    | 46.977 | 61.095 |
| H | 5.927  | 46.316 | 59.911 |
| O | 5.99   | 53.776 | 50.9   |
| H | 5.648  | 54.241 | 50.137 |
| H | 5.513  | 54.149 | 51.641 |
| O | 8.054  | 42.168 | 56.226 |
| H | 8.331  | 41.364 | 56.666 |
| H | 8.384  | 42.872 | 56.784 |
| O | 9.981  | 50.582 | 56.009 |
| H | 9.528  | 50.992 | 55.272 |
| H | 10.343 | 49.773 | 55.649 |
| O | 8.509  | 49.154 | 57.651 |
| H | 9.079  | 49.792 | 57.222 |

|   |        |        |        |
|---|--------|--------|--------|
| H | 8.459  | 49.45  | 58.56  |
| O | 11.602 | 49.484 | 48.801 |
| H | 10.959 | 50.179 | 48.942 |
| H | 11.111 | 48.788 | 48.365 |
| O | 6.941  | 52.544 | 42.668 |
| H | 6.514  | 52.622 | 43.521 |
| H | 6.263  | 52.791 | 42.038 |
| O | 3.583  | 53.614 | 52.361 |
| H | 3.173  | 53.13  | 53.077 |
| H | 3.107  | 53.333 | 51.579 |
| O | 7.161  | 46.404 | 53.631 |
| H | 8.045  | 46.041 | 53.571 |
| H | 6.717  | 46.084 | 52.846 |
| O | 0.238  | 47.708 | 51.482 |
| H | -0.252 | 47.57  | 50.671 |
| H | -0.377 | 48.16  | 52.06  |
| O | -2.428 | 46.027 | 54.576 |
| H | -2.29  | 46.2   | 55.507 |
| H | -2.131 | 45.126 | 54.453 |
| O | 6.016  | 50.462 | 53.686 |
| H | 5.974  | 50.043 | 52.827 |
| H | 5.444  | 49.931 | 54.24  |
| O | 8.433  | 51.483 | 53.972 |
| H | 8.495  | 51.768 | 53.06  |
| H | 7.565  | 51.087 | 54.041 |
| O | 6.466  | 55.449 | 53.314 |
| H | 7.201  | 55.582 | 52.716 |
| H | 6.778  | 54.791 | 53.935 |
| O | 3.787  | 54.655 | 49.147 |
| H | 3.625  | 55.395 | 48.563 |
| H | 2.925  | 54.262 | 49.282 |
| O | -2.16  | 57.777 | 49.525 |
| H | -1.369 | 57.976 | 50.025 |
| H | -1.845 | 57.596 | 48.64  |
| O | 12.525 | 61.996 | 53.437 |
| H | 11.98  | 62.6   | 52.931 |
| H | 13.423 | 62.266 | 53.245 |
| O | 13.162 | 54.908 | 52.37  |
| H | 13.345 | 54.015 | 52.076 |
| H | 12.291 | 54.857 | 52.763 |
| O | 4.949  | 50.121 | 48.314 |
| H | 5.51   | 49.355 | 48.434 |
| H | 4.734  | 50.117 | 47.382 |
| O | 8.227  | 53.752 | 55.24  |
| H | 8.419  | 53.123 | 54.545 |
| H | 9.084  | 53.978 | 55.603 |
| O | 11.571 | 48.124 | 51.641 |



|   |        |        |        |
|---|--------|--------|--------|
| H | 11.512 | 47.466 | 50.948 |
| H | 11.701 | 48.951 | 51.177 |
| O | 5.571  | 53.168 | 54.893 |
| H | 5.59   | 52.784 | 54.017 |
| H | 6.49   | 53.328 | 55.105 |
| O | 6.584  | 59.543 | 55.277 |
| H | 5.729  | 59.814 | 54.942 |
| H | 6.785  | 60.179 | 55.964 |
| O | 13.43  | 52.15  | 50.657 |
| H | 14.269 | 52.602 | 50.568 |
| H | 13.169 | 51.95  | 49.758 |
| O | 10     | 47.764 | 46.947 |
| H | 9.531  | 48.573 | 46.744 |
| H | 9.513  | 47.082 | 46.485 |
| O | 8.14   | 46.26  | 63.65  |
| H | 7.706  | 47.004 | 63.232 |
| H | 7.863  | 45.502 | 63.135 |
| O | 14.737 | 44.422 | 60.147 |
| H | 15.353 | 45.126 | 60.348 |
| H | 14.233 | 44.751 | 59.403 |
| O | 20.059 | 48.419 | 55.101 |
| H | 20.954 | 48.208 | 54.835 |
| H | 20.089 | 49.35  | 55.325 |
| O | 3.007  | 47.167 | 50.377 |
| H | 3.253  | 46.965 | 51.28  |
| H | 2.074  | 47.377 | 50.425 |
| O | 4.382  | 48.897 | 54.885 |
| H | 3.569  | 49.335 | 54.635 |
| H | 4.428  | 49.001 | 55.836 |
| O | 6.812  | 42.229 | 53.507 |
| H | 7.624  | 41.856 | 53.164 |
| H | 6.989  | 42.373 | 54.437 |
| O | -1.336 | 56.702 | 29.508 |
| H | -1.947 | 55.971 | 29.599 |
| H | -0.849 | 56.509 | 28.707 |
| O | 5.254  | 51.554 | 44.928 |
| H | 5.341  | 51.755 | 45.86  |
| H | 5.4    | 50.609 | 44.872 |
| O | 7.991  | 55.305 | 37.92  |
| H | 8.465  | 54.798 | 37.261 |
| H | 7.142  | 55.487 | 37.516 |
| O | 12.133 | 52.343 | 33.856 |
| H | 12.827 | 51.684 | 33.849 |
| H | 11.334 | 51.848 | 34.038 |
| O | 18.133 | 56.226 | 47.72  |
| H | 18.807 | 56.891 | 47.578 |
| H | 18.408 | 55.773 | 48.517 |

|   |        |        |        |
|---|--------|--------|--------|
| O | 11.273 | 50.342 | 41.83  |
| H | 10.383 | 50.689 | 41.891 |
| H | 11.819 | 51.009 | 42.245 |
| O | 11.707 | 53.242 | 40.318 |
| H | 11.025 | 53.013 | 40.948 |
| H | 11.277 | 53.179 | 39.465 |
| O | -0.932 | 48.865 | 30.056 |
| H | -0.307 | 49.495 | 29.697 |
| H | -0.739 | 48.048 | 29.597 |
| O | 4.445  | 57.042 | 33.044 |
| H | 4.427  | 57.803 | 33.625 |
| H | 5.197  | 57.196 | 32.472 |
| O | 5.767  | 54.353 | 35.381 |
| H | 6.471  | 54.456 | 34.741 |
| H | 5.654  | 55.227 | 35.755 |
| O | 5.578  | 57.017 | 36.329 |
| H | 5.027  | 57.632 | 35.846 |
| H | 6.463  | 57.373 | 36.248 |
| O | 4.651  | 56.608 | 38.822 |
| H | 5.057  | 56.618 | 37.955 |
| H | 3.847  | 56.101 | 38.704 |
| O | 6.86   | 58.123 | 31.853 |
| H | 7.033  | 57.223 | 31.577 |
| H | 7.5    | 58.289 | 32.545 |
| O | 2.195  | 57.908 | 45.256 |
| H | 2.9    | 57.603 | 44.685 |
| H | 1.625  | 58.419 | 44.682 |
| O | -0.208 | 54.917 | 38.794 |
| H | -0.56  | 54.863 | 37.906 |
| H | -0.81  | 54.393 | 39.323 |
| O | 5.978  | 51.816 | 36.44  |
| H | 5.885  | 52.71  | 36.112 |
| H | 6.318  | 51.92  | 37.329 |
| O | 6.595  | 58.493 | 42.439 |
| H | 6.136  | 58.898 | 43.175 |
| H | 7.196  | 59.17  | 42.13  |
| O | -0.791 | 49.516 | 43.89  |
| H | -0.816 | 49.735 | 44.822 |
| H | -1.622 | 49.843 | 43.545 |
| O | 8.149  | 49.282 | 45.633 |
| H | 7.784  | 49.222 | 44.75  |
| H | 7.63   | 48.665 | 46.149 |
| O | 7.978  | 57.191 | 55.951 |
| H | 7.623  | 56.909 | 56.794 |
| H | 7.439  | 57.941 | 55.703 |
| O | 2.521  | 54.126 | 38.9   |
| H | 2.471  | 53.219 | 38.596 |

|   |        |        |        |
|---|--------|--------|--------|
| H | 1.608  | 54.402 | 38.981 |
| O | 8.838  | 49.778 | 40.203 |
| H | 9.323  | 49.033 | 39.846 |
| H | 8.827  | 50.419 | 39.492 |
| O | 8.948  | 57.768 | 34.064 |
| H | 9.151  | 58.576 | 34.536 |
| H | 9.478  | 57.099 | 34.496 |
| O | 3.364  | 51.125 | 43.155 |
| H | 3.349  | 50.173 | 43.064 |
| H | 3.808  | 51.279 | 43.989 |
| O | 0.65   | 54.345 | 42.208 |
| H | 1.286  | 53.766 | 42.628 |
| H | 0.435  | 53.907 | 41.384 |
| O | -1.319 | 47.248 | 49.285 |
| H | -1.26  | 46.45  | 48.759 |
| H | -2.199 | 47.223 | 49.661 |
| O | 6.653  | 55.925 | 30.182 |
| H | 7.307  | 55.771 | 29.5   |
| H | 6.481  | 55.057 | 30.548 |
| O | 2.079  | 53.2   | 35.506 |
| H | 1.461  | 52.969 | 34.813 |
| H | 1.891  | 52.58  | 36.211 |
| O | 2.371  | 56.091 | 35.136 |
| H | 2.271  | 55.2   | 35.471 |
| H | 3.156  | 56.055 | 34.59  |
| O | 14.703 | 52.385 | 36.331 |
| H | 15.362 | 52.909 | 36.786 |
| H | 14.046 | 53.02  | 36.047 |
| O | 13.22  | 54.261 | 42.692 |
| H | 13.58  | 53.898 | 41.882 |
| H | 12.765 | 53.525 | 43.102 |
| O | -1.68  | 54.353 | 43.708 |
| H | -1.725 | 53.427 | 43.946 |
| H | -0.908 | 54.418 | 43.144 |
| O | 9.238  | 57.449 | 39.345 |
| H | 8.791  | 56.623 | 39.159 |
| H | 9.998  | 57.198 | 39.869 |
| O | 1.974  | 45.03  | 28.321 |
| H | 2.172  | 45.944 | 28.525 |
| H | 2.703  | 44.744 | 27.771 |
| O | 6.731  | 57.192 | 47.795 |
| H | 7.357  | 57.893 | 47.615 |
| H | 7.256  | 56.391 | 47.778 |
| O | 12.977 | 54.482 | 35.695 |
| H | 13.275 | 55.391 | 35.66  |
| H | 12.343 | 54.41  | 34.982 |
| O | 9.18   | 56.726 | 27.643 |

|   |        |        |        |
|---|--------|--------|--------|
| H | 8.547  | 57.317 | 27.236 |
| H | 8.651  | 55.997 | 27.969 |
| O | 8.931  | 55.907 | 44.653 |
| H | 8.292  | 55.723 | 43.965 |
| H | 8.708  | 56.786 | 44.96  |
| O | 0.376  | 53.017 | 27.084 |
| H | 1.158  | 53.567 | 27.129 |
| H | 0.062  | 52.974 | 27.987 |
| O | 4.778  | 51.142 | 40.599 |
| H | 4.407  | 50.437 | 40.069 |
| H | 4.068  | 51.396 | 41.189 |
| O | 9.209  | 54.524 | 31.726 |
| H | 9.638  | 53.688 | 31.905 |
| H | 9.695  | 54.888 | 30.985 |
| O | 1.648  | 49.652 | 27.11  |
| H | 1.043  | 49.915 | 27.804 |
| H | 1.78   | 50.448 | 26.595 |
| O | -2.22  | 51.247 | 34.742 |
| H | -2.338 | 50.552 | 34.095 |
| H | -2.119 | 52.044 | 34.222 |
| O | 2.411  | 57.322 | 31.014 |
| H | 3.294  | 57.59  | 31.268 |
| H | 2.29   | 57.692 | 30.14  |
| O | 5.035  | 48.931 | 45.824 |
| H | 5.522  | 48.43  | 46.479 |
| H | 4.67   | 48.268 | 45.239 |
| O | 3.937  | 63.631 | 43.354 |
| H | 3.612  | 63.106 | 44.086 |
| H | 4.533  | 64.262 | 43.758 |
| O | 2.311  | 61.056 | 50.733 |
| H | 1.488  | 60.631 | 50.975 |
| H | 2.317  | 61.87  | 51.237 |
| O | 0.74   | 61.491 | 45.528 |
| H | 1.542  | 61.837 | 45.92  |
| H | 1.045  | 60.93  | 44.815 |
| O | 2.696  | 48.621 | 32.936 |
| H | 2.738  | 49.318 | 32.281 |
| H | 3.353  | 48.865 | 33.588 |
| O | 6.932  | 55.552 | 42.743 |
| H | 6.562  | 56.423 | 42.597 |
| H | 6.451  | 54.983 | 42.143 |
| O | 4.032  | 56.574 | 43.485 |
| H | 3.765  | 55.728 | 43.125 |
| H | 4.882  | 56.403 | 43.892 |
| O | 5.506  | 47.636 | 39.138 |
| H | 5.771  | 48.448 | 39.571 |
| H | 4.694  | 47.384 | 39.579 |

|   |        |        |        |
|---|--------|--------|--------|
| O | 0.565  | 44.963 | 43.461 |
| H | 0.815  | 45.754 | 42.984 |
| H | 0.605  | 44.266 | 42.806 |
| O | -2.469 | 53.276 | 49.275 |
| H | -1.83  | 53.989 | 49.293 |
| H | -2.17  | 52.67  | 49.953 |
| O | 7.805  | 61.281 | 46.177 |
| H | 8.037  | 61.856 | 45.448 |
| H | 8.441  | 61.491 | 46.86  |
| O | 2.232  | 50.103 | 49.124 |
| H | 1.838  | 49.394 | 48.615 |
| H | 3.134  | 50.152 | 48.809 |
| O | 0.436  | 55.184 | 46.849 |
| H | -0.385 | 55.548 | 46.517 |
| H | 0.612  | 54.434 | 46.281 |
| O | 3.949  | 47.253 | 30.87  |
| H | 3.607  | 47.65  | 30.069 |
| H | 3.31   | 47.485 | 31.545 |
| O | 2.681  | 49.397 | 36.943 |
| H | 3.585  | 49.087 | 37.002 |
| H | 2.503  | 49.437 | 36.003 |
| O | 13.719 | 50.519 | 32.086 |
| H | 14.572 | 50.949 | 32.13  |
| H | 13.713 | 49.921 | 32.834 |
| O | 13.608 | 53.491 | 31.691 |
| H | 14.544 | 53.411 | 31.874 |
| H | 13.181 | 53.187 | 32.492 |
| O | 3.53   | 50.654 | 31.101 |
| H | 4.033  | 51.391 | 31.449 |
| H | 4.078  | 50.3   | 30.4   |
| O | 11.287 | 58.633 | 36.299 |
| H | 10.397 | 58.985 | 36.33  |
| H | 11.628 | 58.767 | 37.183 |
| O | 11.973 | 60.278 | 44.287 |
| H | 12.544 | 59.512 | 44.327 |
| H | 11.554 | 60.311 | 45.147 |
| O | 3.735  | 53.92  | 42.577 |
| H | 3.801  | 53.04  | 42.948 |
| H | 4.082  | 53.832 | 41.69  |
| O | 13.825 | 47.517 | 37.026 |
| H | 14.347 | 48.315 | 37.109 |
| H | 14.469 | 46.824 | 36.881 |
| O | 4.775  | 59.175 | 40.399 |
| H | 4.53   | 58.522 | 39.742 |
| H | 5.347  | 58.703 | 41.004 |
| O | 8.05   | 58.237 | 36.726 |
| H | 7.6    | 59.003 | 37.083 |

|   |        |        |        |
|---|--------|--------|--------|
| H | 8.587  | 57.916 | 37.45  |
| O | 14.077 | 51.787 | 40.374 |
| H | 14.766 | 52.235 | 39.884 |
| H | 13.274 | 52.249 | 40.135 |
| O | 9.72   | 52.773 | 42.288 |
| H | 8.886  | 52.404 | 42.58  |
| H | 10.002 | 53.331 | 43.013 |
| O | 12.171 | 49.07  | 30.119 |
| H | 12.764 | 49.605 | 30.647 |
| H | 11.631 | 49.705 | 29.649 |
| O | 12.472 | 40.58  | 37.024 |
| H | 12.973 | 41.261 | 37.475 |
| H | 11.812 | 40.307 | 37.661 |
| O | -0.797 | 37.556 | 35.772 |
| H | -0.559 | 36.923 | 35.094 |
| H | 0.019  | 37.718 | 36.245 |
| O | 12.438 | 47.206 | 46.179 |
| H | 12.824 | 46.596 | 46.807 |
| H | 11.621 | 47.49  | 46.591 |
| O | 7.066  | 51.87  | 39.096 |
| H | 6.446  | 51.58  | 39.766 |
| H | 7.408  | 52.7   | 39.429 |
| O | 11.3   | 56.555 | 40.838 |
| H | 11.196 | 57.251 | 41.486 |
| H | 11.507 | 55.776 | 41.354 |
| O | 7.459  | 49.834 | 43.002 |
| H | 7.258  | 50.767 | 43.068 |
| H | 7.573  | 49.679 | 42.064 |
| O | 4.79   | 49.48  | 34.667 |
| H | 5.68   | 49.356 | 34.335 |
| H | 4.831  | 50.3   | 35.16  |
| O | 13.508 | 45.824 | 34.146 |
| H | 13.65  | 45.185 | 33.448 |
| H | 13.155 | 45.31  | 34.873 |
| O | 1.453  | 46.088 | 37.002 |
| H | 1.544  | 47.036 | 36.897 |
| H | 0.863  | 45.825 | 36.296 |
| O | 12.788 | 44.221 | 36.404 |
| H | 12.192 | 44.596 | 37.052 |
| H | 13.518 | 43.879 | 36.92  |
| O | 4.215  | 53.192 | 33.174 |
| H | 3.376  | 53.037 | 33.609 |
| H | 4.806  | 53.454 | 33.88  |
| O | 3.282  | 48.256 | 43.312 |
| H | 2.379  | 48.18  | 43.003 |
| H | 3.813  | 47.943 | 42.579 |
| O | 7.119  | 56.028 | 17.815 |

|   |        |        |        |
|---|--------|--------|--------|
| H | 6.583  | 56.093 | 18.605 |
| H | 6.583  | 55.524 | 17.203 |
| O | 6.997  | 61.936 | 20.017 |
| H | 7.35   | 61.834 | 19.133 |
| H | 6.708  | 61.057 | 20.263 |
| O | 8.016  | 45.115 | 21.159 |
| H | 8.329  | 45.762 | 20.527 |
| H | 7.977  | 45.59  | 21.989 |
| O | 1.586  | 60.94  | 26.098 |
| H | 1.075  | 61.544 | 26.637 |
| H | 2.03   | 60.373 | 26.728 |
| O | 8.837  | 52.824 | 18.308 |
| H | 9.019  | 52.51  | 19.194 |
| H | 7.883  | 52.801 | 18.237 |
| O | 6.028  | 52.146 | 18.305 |
| H | 5.075  | 52.13  | 18.212 |
| H | 6.358  | 51.875 | 17.449 |
| O | 15.83  | 47.141 | 28.695 |
| H | 15.072 | 46.943 | 29.245 |
| H | 15.581 | 47.934 | 28.22  |
| O | 6.07   | 53.943 | 24.08  |
| H | 5.354  | 54.402 | 24.519 |
| H | 5.638  | 53.257 | 23.57  |
| O | 11.374 | 62.959 | 28.576 |
| H | 12.11  | 63.355 | 29.043 |
| H | 10.856 | 62.536 | 29.261 |
| O | 4.906  | 60.831 | 23.944 |
| H | 4.008  | 61.114 | 23.77  |
| H | 5.422  | 61.231 | 23.245 |
| O | 5.497  | 60.849 | 12.344 |
| H | 4.543  | 60.785 | 12.391 |
| H | 5.695  | 61.723 | 12.681 |
| O | 20.382 | 60.983 | 21.16  |
| H | 19.713 | 60.542 | 20.636 |
| H | 20.987 | 61.349 | 20.515 |
| O | 2.906  | 55.097 | 18.52  |
| H | 2.789  | 55.982 | 18.177 |
| H | 2.251  | 54.572 | 18.059 |
| O | 6.587  | 51.624 | 20.998 |
| H | 6.254  | 51.854 | 20.13  |
| H | 7.504  | 51.897 | 20.983 |
| O | 2.403  | 55.779 | 10.859 |
| H | 3.308  | 55.757 | 10.546 |
| H | 2.479  | 55.77  | 11.813 |
| O | 3.011  | 45.554 | 7.668  |
| H | 2.869  | 45.114 | 8.507  |
| H | 2.173  | 45.972 | 7.472  |

|   |        |        |        |
|---|--------|--------|--------|
| O | 5.506  | 50.139 | 29.107 |
| H | 5.97   | 49.636 | 28.438 |
| H | 6.159  | 50.286 | 29.791 |
| O | 4.564  | 47.167 | 26.111 |
| H | 4.753  | 46.236 | 25.99  |
| H | 4.222  | 47.454 | 25.264 |
| O | 12.596 | 52.586 | 18.659 |
| H | 11.725 | 52.807 | 18.329 |
| H | 13.198 | 53.057 | 18.082 |
| O | 8.988  | 49.706 | 23.959 |
| H | 8.715  | 49.401 | 23.094 |
| H | 8.361  | 50.395 | 24.18  |
| O | -0.229 | 47.695 | 15.82  |
| H | -0.97  | 47.163 | 16.111 |
| H | -0.537 | 48.598 | 15.896 |
| O | 2.136  | 57.479 | 17.111 |
| H | 1.667  | 57.604 | 16.285 |
| H | 1.446  | 57.317 | 17.755 |
| O | 3.957  | 50.911 | 16.336 |
| H | 4.452  | 50.092 | 16.316 |
| H | 3.092  | 50.66  | 16.661 |
| O | -1.473 | 60.821 | 25.419 |
| H | -1.469 | 61.692 | 25.023 |
| H | -1.15  | 60.96  | 26.309 |
| O | 3.914  | 53.848 | 20.417 |
| H | 3.507  | 54.327 | 19.695 |
| H | 4.007  | 52.954 | 20.088 |
| O | 5.651  | 52.369 | 26.89  |
| H | 5.048  | 52.152 | 26.179 |
| H | 5.387  | 51.796 | 27.611 |
| O | 4.491  | 52.377 | 22.648 |
| H | 4.987  | 51.74  | 22.133 |
| H | 4.078  | 52.942 | 21.996 |
| O | 7.315  | 53.192 | 13.311 |
| H | 7.416  | 53.147 | 14.262 |
| H | 6.487  | 52.745 | 13.137 |
| O | 0.025  | 52.468 | 12.7   |
| H | -0.924 | 52.365 | 12.77  |
| H | 0.379  | 51.903 | 13.387 |
| O | 0.42   | 48.311 | 25.125 |
| H | -0.182 | 49.046 | 25.01  |
| H | 0.985  | 48.576 | 25.851 |
| O | 11.259 | 45.047 | 27.586 |
| H | 10.449 | 44.706 | 27.208 |
| H | 11.138 | 45.997 | 27.594 |
| O | -1.801 | 52.778 | 24.621 |
| H | -2.166 | 52.752 | 25.506 |



|   |        |        |        |
|---|--------|--------|--------|
| H | -1.574 | 53.698 | 24.483 |
| O | 1.74   | 54.619 | 31.365 |
| H | 2      | 55.537 | 31.288 |
| H | 2.375  | 54.144 | 30.828 |
| O | 4.219  | 52.762 | 14.405 |
| H | 4.106  | 52.254 | 13.602 |
| H | 4.282  | 52.104 | 15.098 |
| O | 4.651  | 55.496 | 27.589 |
| H | 4.571  | 56.314 | 28.079 |
| H | 3.959  | 55.544 | 26.929 |
| O | 13.038 | 55.297 | 21.577 |
| H | 12.491 | 55.752 | 20.936 |
| H | 13.887 | 55.206 | 21.145 |
| O | 11.731 | 56.332 | 8.46   |
| H | 12.543 | 55.91  | 8.738  |
| H | 11.305 | 56.593 | 9.277  |
| O | 17.214 | 57.533 | 26.848 |
| H | 16.448 | 57.946 | 27.247 |
| H | 17.589 | 58.214 | 26.289 |
| O | -2.051 | 60.781 | 16.153 |
| H | -2.519 | 61.257 | 15.468 |
| H | -1.137 | 60.789 | 15.868 |
| O | 7.618  | 46.889 | 23.13  |
| H | 8.414  | 47.041 | 23.64  |
| H | 7.524  | 47.675 | 22.592 |
| O | 14.002 | 45.134 | 23.319 |
| H | 13.601 | 45.98  | 23.519 |
| H | 14.918 | 45.236 | 23.579 |
| O | 1.857  | 59.998 | 18.642 |
| H | 2.435  | 59.288 | 18.925 |
| H | 1.424  | 60.287 | 19.445 |
| O | -6.316 | 50.637 | 22.828 |
| H | -6.825 | 50.345 | 22.071 |
| H | -5.52  | 50.106 | 22.8   |
| O | 3.945  | 47.36  | 11.797 |
| H | 3.622  | 47.748 | 10.985 |
| H | 4.667  | 47.929 | 12.064 |
| O | 7.741  | 51.973 | 24.625 |
| H | 8.476  | 52.512 | 24.918 |
| H | 7.014  | 52.59  | 24.533 |
| O | 9.358  | 62.911 | 20.472 |
| H | 8.531  | 62.429 | 20.428 |
| H | 9.842  | 62.491 | 21.182 |
| O | -0.162 | 54.12  | 19.486 |
| H | -0.257 | 55.072 | 19.532 |
| H | 0.168  | 53.955 | 18.603 |
| O | -2.404 | 56.878 | 17.204 |

|   |        |        |        |
|---|--------|--------|--------|
| H | -2.981 | 56.254 | 17.646 |
| H | -2.471 | 57.677 | 17.726 |
| O | 0.727  | 59.624 | 13.042 |
| H | 1.33   | 60.349 | 12.878 |
| H | 1.287  | 58.912 | 13.352 |
| O | 7.158  | 54.785 | 27.44  |
| H | 6.954  | 53.865 | 27.274 |
| H | 6.307  | 55.193 | 27.602 |
| O | 7.716  | 63.01  | 33.946 |
| H | 7.607  | 62.336 | 33.276 |
| H | 7.094  | 62.769 | 34.632 |
| O | 1.613  | 44.386 | 22.724 |
| H | 2.278  | 44.079 | 23.341 |
| H | 1.566  | 45.33  | 22.872 |
| O | 12.872 | 47.841 | 23.511 |
| H | 13.761 | 48.046 | 23.219 |
| H | 12.666 | 48.525 | 24.148 |
| O | -2.26  | 53.386 | 33.183 |
| H | -2.098 | 53.934 | 32.415 |
| H | -3.207 | 53.248 | 33.184 |
| O | 11.433 | 49.417 | 25.443 |
| H | 11.715 | 50.284 | 25.733 |
| H | 10.597 | 49.571 | 25.002 |
| O | -0.872 | 48.994 | 19.6   |
| H | -0.806 | 48.088 | 19.901 |
| H | -1.188 | 49.477 | 20.363 |
| O | 7.355  | 45.35  | 25.919 |
| H | 7.443  | 45.855 | 26.727 |
| H | 7.812  | 45.872 | 25.259 |
| O | 5.876  | 56.029 | 20.333 |
| H | 5.956  | 55.307 | 20.956 |
| H | 5.334  | 56.676 | 20.784 |
| O | -0.868 | 49.361 | 11.989 |
| H | -0.491 | 49.845 | 11.254 |
| H | -1.663 | 49.845 | 12.212 |
| O | 14.455 | 55.862 | 18.268 |
| H | 13.992 | 55.103 | 17.913 |
| H | 13.79  | 56.549 | 18.313 |
| O | 12.142 | 55.424 | 15.472 |
| H | 11.207 | 55.239 | 15.567 |
| H | 12.571 | 54.59  | 15.661 |
| O | 10.706 | 47.898 | 10.497 |
| H | 10.445 | 48.787 | 10.737 |
| H | 9.976  | 47.349 | 10.782 |
| O | 6.974  | 54.905 | 11.247 |
| H | 7.655  | 55.574 | 11.177 |
| H | 7.309  | 54.29  | 11.899 |

|   |        |        |        |
|---|--------|--------|--------|
| O | 14.705 | 57.522 | 22.866 |
| H | 13.801 | 57.83  | 22.801 |
| H | 14.714 | 56.972 | 23.649 |
| O | 8.033  | 50.614 | 27.555 |
| H | 7.566  | 51.029 | 26.83  |
| H | 7.891  | 49.676 | 27.426 |
| O | 5.088  | 57.888 | 22.494 |
| H | 4.664  | 58.616 | 22.039 |
| H | 5.048  | 58.129 | 23.42  |
| O | 5.175  | 58.145 | 29.563 |
| H | 5.75   | 58.758 | 30.021 |
| H | 5.45   | 57.282 | 29.872 |
| O | 16.049 | 50.808 | 18.235 |
| H | 16.034 | 50.657 | 17.29  |
| H | 16.501 | 51.645 | 18.338 |
| O | 10.093 | 46.654 | 24.598 |
| H | 10.834 | 47.073 | 24.16  |
| H | 10.208 | 46.871 | 25.523 |
| O | 13.761 | 43.919 | 27.421 |
| H | 14.244 | 44.567 | 26.908 |
| H | 12.892 | 44.303 | 27.534 |
| O | 8.778  | 49.292 | 17.028 |
| H | 8.309  | 49.118 | 17.844 |
| H | 9.665  | 49.522 | 17.305 |
| O | 9.17   | 58.337 | 20.192 |
| H | 9.354  | 57.644 | 19.558 |
| H | 9.606  | 59.11  | 19.835 |
| O | -1.661 | 40.641 | 27.121 |
| H | -1.171 | 39.841 | 27.314 |
| H | -1.1   | 41.348 | 27.44  |
| O | 0.264  | 52.93  | 22.032 |
| H | -0.097 | 53.731 | 22.414 |
| H | 0.436  | 53.157 | 21.118 |
| O | 13.461 | 50.044 | 19.185 |
| H | 14.399 | 50.204 | 19.08  |
| H | 13.066 | 50.916 | 19.169 |
| O | 9.416  | 39.227 | 20.385 |
| H | 8.642  | 39.482 | 20.887 |
| H | 9.438  | 38.272 | 20.446 |
| O | 3.648  | 51.708 | 24.985 |
| H | 3.945  | 52.107 | 24.167 |
| H | 2.733  | 51.479 | 24.821 |
| O | 10.558 | 48.279 | 20.236 |
| H | 10.683 | 49.157 | 20.596 |
| H | 11.263 | 47.759 | 20.622 |
| O | 12.796 | 41.6   | 19.722 |
| H | 11.958 | 42.009 | 19.938 |

|   |        |        |        |
|---|--------|--------|--------|
| H | 13.152 | 42.14  | 19.016 |
| O | 3.889  | 51.466 | 11.532 |
| H | 3.91   | 51.917 | 10.688 |
| H | 2.994  | 51.132 | 11.602 |
| O | 2.716  | 51.63  | 19.517 |
| H | 2.564  | 50.785 | 19.092 |
| H | 1.965  | 52.165 | 19.261 |
| O | 1.937  | 49.602 | 12.925 |
| H | 2.203  | 48.78  | 13.337 |
| H | 1.033  | 49.45  | 12.648 |
| O | -3.088 | 48.457 | 38.241 |
| H | -3.352 | 47.721 | 37.69  |
| H | -3.823 | 49.069 | 38.194 |
| O | 5.036  | 52.966 | 1.749  |
| H | 4.655  | 53.069 | 0.877  |
| H | 5.73   | 53.625 | 1.786  |
| O | 3.468  | 62.759 | 2.767  |
| H | 2.59   | 62.653 | 3.133  |
| H | 3.483  | 62.175 | 2.008  |
| O | 7.744  | 55.269 | 6.611  |
| H | 7.204  | 55.845 | 7.151  |
| H | 7.115  | 54.743 | 6.117  |
| O | 11.925 | 49.76  | 13.098 |
| H | 11.099 | 49.295 | 13.23  |
| H | 12.546 | 49.078 | 12.84  |
| O | 11.193 | 48.983 | 3.428  |
| H | 10.587 | 48.247 | 3.517  |
| H | 10.874 | 49.633 | 4.053  |
| O | 10.798 | 55.297 | 4.015  |
| H | 11.444 | 54.642 | 3.75   |
| H | 10.758 | 55.222 | 4.968  |
| O | 4.911  | 39.047 | 0.308  |
| H | 4.632  | 39.531 | -0.469 |
| H | 5.609  | 39.581 | 0.686  |
| O | 9.29   | 61.01  | -0.454 |
| H | 9.67   | 60.134 | -0.391 |
| H | 9.493  | 61.42  | 0.387  |
| O | 13.348 | 62.204 | 6.001  |
| H | 13.718 | 62.74  | 5.3    |
| H | 13.058 | 62.835 | 6.659  |
| O | 9.756  | 61.832 | 7.487  |
| H | 10.415 | 61.363 | 8      |
| H | 8.939  | 61.698 | 7.966  |
| O | 13.916 | 45.347 | 15.189 |
| H | 14.871 | 45.329 | 15.254 |
| H | 13.732 | 45.07  | 14.292 |
| O | -2.618 | 57.365 | 13.398 |

|   |        |        |        |
|---|--------|--------|--------|
| H | -3.472 | 56.987 | 13.189 |
| H | -2.681 | 58.275 | 13.108 |
| O | 5.052  | 49.662 | 13.213 |
| H | 4.131  | 49.405 | 13.244 |
| H | 5.094  | 50.321 | 12.52  |
| O | 3.931  | 55.865 | 5.395  |
| H | 4.335  | 56.363 | 6.106  |
| H | 3.643  | 56.531 | 4.77   |
| O | 0.401  | 49.812 | 3.521  |
| H | 1.094  | 50.433 | 3.297  |
| H | 0.651  | 49.003 | 3.074  |
| O | 6.222  | 54.544 | 15.663 |
| H | 6.059  | 55.294 | 15.091 |
| H | 5.506  | 53.938 | 15.472 |
| O | 1.44   | 53.281 | 10.436 |
| H | 1.009  | 53.302 | 11.291 |
| H | 2.184  | 53.876 | 10.528 |
| O | 3.178  | 51.253 | 3.255  |
| H | 3.729  | 50.534 | 3.564  |
| H | 3.797  | 51.946 | 3.024  |
| O | 8.553  | 56.571 | 3.61   |
| H | 8.379  | 56.542 | 4.551  |
| H | 9.352  | 56.056 | 3.498  |
| O | 9.072  | 53.134 | -0.079 |
| H | 8.325  | 53.2   | -0.674 |
| H | 9.082  | 53.969 | 0.387  |
| O | 9.428  | 43.299 | 8.239  |
| H | 10.367 | 43.353 | 8.062  |
| H | 9.28   | 42.382 | 8.47   |
| O | 17.372 | 55.339 | 5.707  |
| H | 16.45  | 55.428 | 5.946  |
| H | 17.752 | 54.811 | 6.409  |
| O | 7.238  | 57.538 | 9.448  |
| H | 6.558  | 57.612 | 10.117 |
| H | 7.783  | 58.315 | 9.574  |
| O | 4.55   | 51.744 | 6.724  |
| H | 4.993  | 52.287 | 6.071  |
| H | 4.725  | 52.181 | 7.557  |
| O | 16.355 | 53.156 | 12.576 |
| H | 16.699 | 52.272 | 12.45  |
| H | 16.654 | 53.407 | 13.449 |
| O | 16.87  | 58.721 | 4.736  |
| H | 17.347 | 57.914 | 4.543  |
| H | 15.949 | 58.46  | 4.738  |
| O | 5.666  | 64.542 | 6.896  |
| H | 5.971  | 63.649 | 7.053  |
| H | 6.351  | 64.939 | 6.358  |

|   |        |        |        |
|---|--------|--------|--------|
| O | 14.048 | 53.3   | 16.678 |
| H | 13.726 | 52.498 | 16.267 |
| H | 14.732 | 53.614 | 16.087 |
| O | 5.219  | 60.754 | 1.459  |
| H | 5.541  | 59.853 | 1.489  |
| H | 6.011  | 61.29  | 1.413  |
| O | 5.609  | 53.593 | 4.853  |
| H | 5.932  | 53.605 | 3.952  |
| H | 5.047  | 54.365 | 4.917  |
| O | 4.908  | 60.042 | 8.979  |
| H | 4.108  | 59.839 | 8.495  |
| H | 4.689  | 60.823 | 9.487  |
| O | 10.314 | 60.662 | 18.895 |
| H | 10.046 | 61.477 | 18.471 |
| H | 10.844 | 60.213 | 18.237 |
| O | 4.86   | 55.532 | 9.787  |
| H | 5.516  | 55.19  | 10.395 |
| H | 5.358  | 56.079 | 9.18   |
| O | 0.847  | 60.795 | 6.507  |
| H | 0.674  | 59.924 | 6.863  |
| H | 0.615  | 61.395 | 7.216  |
| O | 1.939  | 57.406 | 14.29  |
| H | 1.088  | 56.999 | 14.454 |
| H | 2.506  | 56.678 | 14.033 |
| O | 9.081  | 61.48  | 15.331 |
| H | 8.539  | 60.805 | 14.922 |
| H | 9.961  | 61.321 | 14.991 |
| O | 1.988  | 51.584 | 6.786  |
| H | 1.754  | 52.044 | 7.592  |
| H | 2.933  | 51.449 | 6.852  |
| O | 4.824  | 52.855 | 9.152  |
| H | 5.019  | 53.792 | 9.182  |
| H | 5.668  | 52.429 | 9.301  |
| O | 10.909 | 61.841 | 4.273  |
| H | 10.325 | 62.101 | 4.985  |
| H | 11.789 | 61.983 | 4.621  |
| O | 11.864 | 43.867 | 10.734 |
| H | 12.427 | 43.577 | 11.452 |
| H | 11.096 | 44.239 | 11.168 |
| O | 4.606  | 51.091 | -8.234 |
| H | 5.147  | 51.842 | -7.989 |
| H | 4.865  | 50.894 | -9.134 |
| O | 11.841 | 60.562 | -3.322 |
| H | 11.955 | 60.885 | -4.216 |
| H | 11.744 | 59.615 | -3.42  |
| O | 6.769  | 42.705 | -0.153 |
| H | 6.59   | 41.959 | -0.725 |

|   |        |        |        |
|---|--------|--------|--------|
| H | 7.718  | 42.686 | -0.025 |
| O | 11.206 | 45.935 | 2.985  |
| H | 11.755 | 45.346 | 3.503  |
| H | 11.824 | 46.424 | 2.443  |
| O | 1.587  | 54.214 | 5.975  |
| H | 1.975  | 53.357 | 5.799  |
| H | 2.259  | 54.841 | 5.707  |
| O | -1.683 | 51.071 | 8.287  |
| H | -0.911 | 50.773 | 8.768  |
| H | -1.435 | 50.995 | 7.365  |
| O | 9.752  | 50.586 | 11.42  |
| H | 8.926  | 50.214 | 11.11  |
| H | 9.657  | 50.62  | 12.372 |
| O | 14.637 | 55.42  | 6.334  |
| H | 14.033 | 54.764 | 5.985  |
| H | 14.308 | 55.605 | 7.213  |
| O | 7.353  | 51.924 | 9.145  |
| H | 7.378  | 50.994 | 9.371  |
| H | 8.173  | 52.079 | 8.677  |
| O | 13.903 | 50.65  | 1.677  |
| H | 13.36  | 49.898 | 1.44   |
| H | 13.829 | 50.708 | 2.629  |
| O | 12.424 | 58.443 | 6.731  |
| H | 12.233 | 59.035 | 7.458  |
| H | 12.134 | 57.584 | 7.038  |
| O | 8.021  | 56.703 | -0.368 |
| H | 7.604  | 57.447 | 0.065  |
| H | 8.915  | 56.996 | -0.542 |
| O | 4.874  | 45.804 | 23.563 |
| H | 5.826  | 45.819 | 23.463 |
| H | 4.612  | 46.722 | 23.496 |
| O | 6.667  | 33.772 | 52.743 |
| H | 7.49   | 34.113 | 52.392 |
| H | 6.302  | 34.499 | 53.247 |
| O | 3.416  | 40.499 | 65.357 |
| H | 3.544  | 41.435 | 65.51  |
| H | 2.58   | 40.444 | 64.893 |
| O | 16.313 | 50.49  | 58.341 |
| H | 16.115 | 49.624 | 57.984 |
| H | 15.457 | 50.87  | 58.538 |
| O | 1.388  | 37.08  | 61.937 |
| H | 0.526  | 36.709 | 61.749 |
| H | 1.996  | 36.545 | 61.426 |
| O | -0.797 | 45.267 | 58.546 |
| H | -0.517 | 46.124 | 58.868 |
| H | -1.618 | 45.441 | 58.086 |
| O | 1.484  | 36.866 | 55.417 |

|   |        |        |        |
|---|--------|--------|--------|
| H | 1.628  | 36.1   | 55.972 |
| H | 1.701  | 37.612 | 55.976 |
| O | 9.814  | 38.834 | 55.158 |
| H | 9.708  | 39.688 | 54.737 |
| H | 9.633  | 38.999 | 56.083 |
| O | 9.797  | 41.807 | 53.883 |
| H | 9.386  | 41.997 | 54.726 |
| H | 10.441 | 42.506 | 53.768 |
| O | 11.726 | 28.132 | 60.174 |
| H | 11.468 | 27.219 | 60.045 |
| H | 11.401 | 28.352 | 61.047 |
| O | -0.178 | 43.871 | 65.449 |
| H | -1.131 | 43.863 | 65.532 |
| H | 0.136  | 43.449 | 66.249 |
| O | 11.405 | 39.901 | 58.4   |
| H | 11.797 | 40.281 | 57.614 |
| H | 11.798 | 40.389 | 59.124 |
| O | 11.826 | 39.103 | 53.173 |
| H | 10.957 | 38.952 | 53.546 |
| H | 12.018 | 38.303 | 52.683 |
| O | 0.055  | 45.075 | 53.515 |
| H | 0.445  | 45.29  | 54.362 |
| H | 0.08   | 45.896 | 53.024 |
| O | 14.336 | 42.047 | 48.491 |
| H | 13.502 | 41.622 | 48.295 |
| H | 14.876 | 41.354 | 48.871 |
| O | -0.011 | 38.576 | 51.695 |
| H | -0.695 | 39.051 | 52.167 |
| H | 0.808  | 38.894 | 52.075 |
| O | 10.97  | 41.158 | 47.447 |
| H | 10.248 | 41.774 | 47.571 |
| H | 10.564 | 40.294 | 47.524 |
| O | 8.951  | 44.263 | 48.546 |
| H | 9.384  | 43.754 | 49.231 |
| H | 8.079  | 43.874 | 48.474 |
| O | 7.387  | 37.163 | 55.646 |
| H | 7.983  | 37.897 | 55.49  |
| H | 7.143  | 37.245 | 56.568 |
| O | 6.293  | 48.367 | 51.877 |
| H | 6.51   | 47.931 | 52.701 |
| H | 5.377  | 48.139 | 51.72  |
| O | 9.746  | 25.87  | 52.246 |
| H | 9.1    | 25.216 | 52.511 |
| H | 10.587 | 25.498 | 52.512 |
| O | 6.505  | 44.843 | 51.33  |
| H | 5.782  | 45.281 | 50.881 |
| H | 6.674  | 44.061 | 50.805 |



|   |        |        |        |
|---|--------|--------|--------|
| O | 5.781  | 45.126 | 43.54  |
| H | 5.543  | 44.215 | 43.367 |
| H | 5.002  | 45.504 | 43.947 |
| O | 1.185  | 44.559 | 49.899 |
| H | 1.574  | 45.342 | 49.507 |
| H | 0.617  | 44.205 | 49.214 |
| O | 3.866  | 26.421 | 55.738 |
| H | 3.706  | 26.182 | 54.826 |
| H | 3.073  | 26.885 | 56.007 |
| O | -3.469 | 34.501 | 57.889 |
| H | -3.85  | 33.854 | 57.295 |
| H | -2.529 | 34.322 | 57.866 |
| O | 11.034 | 40.232 | 50.489 |
| H | 11.598 | 40.185 | 51.261 |
| H | 11.583 | 39.916 | 49.772 |
| O | -4.445 | 35.431 | 47.734 |
| H | -5.196 | 35.723 | 48.25  |
| H | -4.781 | 34.701 | 47.213 |
| O | 4.473  | 36.752 | 61.013 |
| H | 4.633  | 37.5   | 60.438 |
| H | 4.367  | 36.01  | 60.418 |
| O | -0.871 | 31.618 | 56.115 |
| H | -0.824 | 30.722 | 55.782 |
| H | -1.085 | 32.148 | 55.346 |
| O | -3.131 | 34.065 | 60.638 |
| H | -3.32  | 34.265 | 59.721 |
| H | -2.496 | 34.73  | 60.903 |
| O | 8.798  | 29.646 | 61.104 |
| H | 9.54   | 29.193 | 61.504 |
| H | 8.035  | 29.325 | 61.584 |
| O | 14.846 | 40.825 | 56.827 |
| H | 15.13  | 40.744 | 57.737 |
| H | 15.317 | 41.591 | 56.497 |
| O | 5.246  | 38.898 | 47.779 |
| H | 5.151  | 38.907 | 46.827 |
| H | 4.855  | 38.068 | 48.051 |
| O | 6.853  | 42.601 | 49.056 |
| H | 7.28   | 41.857 | 48.632 |
| H | 6.244  | 42.205 | 49.679 |
| O | 2.249  | 35.376 | 59.66  |
| H | 2.735  | 35.527 | 58.849 |
| H | 1.347  | 35.232 | 59.375 |
| O | 9.55   | 35.778 | 47.419 |
| H | 9.37   | 36.153 | 48.281 |
| H | 8.71   | 35.815 | 46.961 |
| O | 0.97   | 48.155 | 47.448 |
| H | 1.14   | 47.53  | 46.743 |

|   |        |        |        |
|---|--------|--------|--------|
| H | 0.607  | 47.623 | 48.156 |
| O | 6.962  | 43.688 | 62.211 |
| H | 7.472  | 43.29  | 61.506 |
| H | 6.511  | 44.423 | 61.795 |
| O | 2.846  | 43.14  | 51.595 |
| H | 3.229  | 43.927 | 51.983 |
| H | 2.096  | 43.461 | 51.094 |
| O | -1.985 | 41.875 | 48.995 |
| H | -2.056 | 41.915 | 49.949 |
| H | -2.617 | 41.205 | 48.736 |
| O | 0.482  | 44.494 | 62.797 |
| H | 0.287  | 44.492 | 63.734 |
| H | 1.227  | 43.9   | 62.705 |
| O | 5.735  | 39.033 | 51.654 |
| H | 5.557  | 39.973 | 51.689 |
| H | 6.57   | 38.963 | 51.192 |
| O | 8.441  | 39.112 | 50.239 |
| H | 9.308  | 39.375 | 50.546 |
| H | 8.357  | 39.522 | 49.378 |
| O | 7.892  | 29.318 | 50.293 |
| H | 8.578  | 29.163 | 50.943 |
| H | 7.203  | 28.694 | 50.519 |
| O | 6.807  | 41.902 | 39.354 |
| H | 7.605  | 42.43  | 39.329 |
| H | 6.11   | 42.51  | 39.105 |
| O | 1.795  | 35.958 | 48.981 |
| H | 1.758  | 35.876 | 48.028 |
| H | 1.173  | 36.656 | 49.185 |
| O | 5.742  | 31.726 | 60.632 |
| H | 5.873  | 30.84  | 60.97  |
| H | 5.486  | 31.598 | 59.718 |
| O | 2.141  | 50.643 | 51.778 |
| H | 1.925  | 50.18  | 50.968 |
| H | 3.097  | 50.699 | 51.774 |
| O | 1.633  | 34.609 | 57.009 |
| H | 2.267  | 34.007 | 56.618 |
| H | 1.223  | 34.102 | 57.711 |
| O | 8.926  | 44.343 | 57.598 |
| H | 8.661  | 45.238 | 57.806 |
| H | 9.781  | 44.243 | 58.018 |
| O | -5.631 | 49.976 | 59.47  |
| H | -5.123 | 49.218 | 59.759 |
| H | -5.758 | 49.835 | 58.531 |
| O | 10.554 | 46.547 | 49.535 |
| H | 10.662 | 45.627 | 49.292 |
| H | 10.264 | 46.975 | 48.729 |
| O | 3.676  | 41.516 | 46.325 |

|   |        |        |        |
|---|--------|--------|--------|
| H | 3.008  | 40.987 | 46.761 |
| H | 4.078  | 42.023 | 47.029 |
| O | 0.567  | 45.648 | 46.205 |
| H | 0.304  | 45.772 | 45.293 |
| H | 0.364  | 44.731 | 46.39  |
| O | 0.58   | 41.168 | 46.281 |
| H | 0.774  | 40.288 | 46.604 |
| H | 1.03   | 41.217 | 45.437 |
| O | 7.546  | 40.331 | 47.676 |
| H | 8.056  | 39.831 | 47.038 |
| H | 6.801  | 39.767 | 47.881 |
| O | 2.857  | 35.083 | 53.548 |
| H | 3.717  | 35.5   | 53.488 |
| H | 2.297  | 35.746 | 53.952 |
| O | 3.525  | 30.43  | 45.132 |
| H | 4.097  | 29.675 | 45.271 |
| H | 2.727  | 30.059 | 44.755 |
| O | 2.452  | 44.416 | 40.606 |
| H | 1.512  | 44.234 | 40.581 |
| H | 2.843  | 43.61  | 40.943 |
| O | 15.095 | 49.119 | 45.775 |
| H | 14.296 | 48.596 | 45.839 |
| H | 14.989 | 49.619 | 44.966 |
| O | 3.319  | 40.4   | 49.135 |
| H | 4.206  | 40.165 | 48.863 |
| H | 3.432  | 40.811 | 49.992 |
| O | 18.066 | 40.1   | 52.415 |
| H | 17.35  | 39.471 | 52.496 |
| H | 18.203 | 40.188 | 51.471 |
| O | 9.348  | 45.576 | 51.983 |
| H | 8.561  | 45.108 | 51.703 |
| H | 9.702  | 45.951 | 51.176 |
| O | 6.154  | 30.747 | 48.539 |
| H | 6.699  | 30.317 | 49.198 |
| H | 5.255  | 30.569 | 48.818 |
| O | 8.693  | 36.644 | 49.647 |
| H | 8.452  | 37.549 | 49.843 |
| H | 8.359  | 36.141 | 50.39  |
| O | 8.926  | 39.877 | 57.779 |
| H | 8.642  | 39.204 | 58.398 |
| H | 9.872  | 39.94  | 57.911 |
| O | 11.254 | 28.303 | 54.905 |
| H | 11.947 | 27.922 | 54.366 |
| H | 10.708 | 27.558 | 55.155 |
| O | 12.083 | 32.444 | 56.747 |
| H | 11.562 | 32.562 | 55.953 |
| H | 12.137 | 31.495 | 56.86  |

|   |        |        |        |
|---|--------|--------|--------|
| O | 10.219 | 29.842 | 46.666 |
| H | 10.21  | 30.578 | 47.278 |
| H | 9.441  | 29.333 | 46.893 |
| O | 13.055 | 31.176 | 53.527 |
| H | 12.863 | 30.643 | 54.298 |
| H | 13.798 | 31.719 | 53.789 |
| O | 13.411 | 46.557 | 59.142 |
| H | 13.348 | 47.286 | 58.525 |
| H | 13.513 | 46.975 | 59.997 |
| O | 17.766 | 48.287 | 53.845 |
| H | 18.605 | 48.502 | 54.251 |
| H | 17.503 | 49.091 | 53.397 |
| O | 9.434  | 43.064 | 60.444 |
| H | 9.76   | 43.963 | 60.395 |
| H | 10.193 | 42.547 | 60.712 |
| O | 5.249  | 33.1   | 63.201 |
| H | 4.431  | 33.057 | 62.707 |
| H | 5.857  | 33.557 | 62.62  |
| O | 7.658  | 31.294 | 55.075 |
| H | 7.692  | 30.366 | 54.844 |
| H | 6.871  | 31.621 | 54.638 |
| O | 13.325 | 28.83  | 51.818 |
| H | 13.146 | 28.698 | 52.749 |
| H | 13.377 | 29.78  | 51.716 |
| O | 5.446  | 36.164 | 53.655 |
| H | 6.043  | 36.449 | 54.348 |
| H | 5.269  | 36.957 | 53.15  |
| O | 5.588  | 30.039 | 58.236 |
| H | 5.752  | 29.188 | 57.83  |
| H | 4.634  | 30.108 | 58.27  |
| O | 5.044  | 31.632 | 53.478 |
| H | 4.823  | 30.96  | 52.833 |
| H | 5.503  | 32.305 | 52.975 |
| O | 11.693 | 46.041 | 53.793 |
| H | 11.376 | 46.371 | 52.952 |
| H | 12.12  | 45.212 | 53.58  |
| O | 8.919  | 32.962 | 40.302 |
| H | 9.087  | 32.98  | 39.36  |
| H | 9.435  | 32.223 | 40.624 |
| O | 5.792  | 40.267 | 37.545 |
| H | 6.562  | 39.706 | 37.456 |
| H | 6.046  | 40.92  | 38.198 |
| O | 4.409  | 34.831 | 36.507 |
| H | 4.094  | 34.886 | 35.605 |
| H | 3.683  | 34.437 | 36.991 |
| O | 0.505  | 52.783 | 45.403 |
| H | 0.447  | 52.189 | 44.654 |

|   |        |        |        |
|---|--------|--------|--------|
| H | 0.468  | 52.208 | 46.167 |
| O | 2.419  | 38.981 | 40.994 |
| H | 2.871  | 38.46  | 41.658 |
| H | 3.039  | 39.032 | 40.267 |
| O | 9.291  | 33.605 | 37.72  |
| H | 8.935  | 32.922 | 37.152 |
| H | 8.858  | 34.408 | 37.429 |
| O | 12.262 | 37.992 | 41.8   |
| H | 12.873 | 38.278 | 41.122 |
| H | 12.634 | 37.173 | 42.128 |
| O | 16.509 | 31.768 | 36.487 |
| H | 15.9   | 32.384 | 36.895 |
| H | 17.317 | 31.859 | 36.994 |
| O | 3.969  | 41.239 | 41.556 |
| H | 3.878  | 40.311 | 41.772 |
| H | 4.086  | 41.253 | 40.606 |
| O | 3.773  | 35.842 | 40.816 |
| H | 3.041  | 36.016 | 40.225 |
| H | 4.38   | 36.566 | 40.665 |
| O | 9.689  | 37.9   | 40.363 |
| H | 9.774  | 38.66  | 39.787 |
| H | 10.529 | 37.848 | 40.818 |
| O | 11.696 | 33.519 | 30.991 |
| H | 12.633 | 33.476 | 31.182 |
| H | 11.459 | 34.431 | 31.162 |
| O | 1.682  | 32.144 | 35.39  |
| H | 2.545  | 32.477 | 35.144 |
| H | 1.715  | 31.212 | 35.178 |
| O | 8.37   | 41.838 | 33.049 |
| H | 9.228  | 41.551 | 33.362 |
| H | 7.889  | 41.026 | 32.89  |
| O | 6.546  | 37.53  | 38.199 |
| H | 7.149  | 36.789 | 38.137 |
| H | 6.219  | 37.499 | 39.098 |
| O | 13.158 | 44.383 | 44.809 |
| H | 12.75  | 43.553 | 45.055 |
| H | 12.422 | 44.958 | 44.597 |
| O | 1.661  | 36.368 | 39.117 |
| H | 1.502  | 37.071 | 38.487 |
| H | 2.04   | 35.66  | 38.596 |
| O | 4.67   | 37.204 | 31.335 |
| H | 5.565  | 37.173 | 30.997 |
| H | 4.644  | 37.995 | 31.874 |
| O | 7.503  | 41.488 | 42.162 |
| H | 7.156  | 41.306 | 41.288 |
| H | 8.132  | 42.196 | 42.027 |
| O | 6.616  | 38.01  | 35.247 |

|   |        |        |        |
|---|--------|--------|--------|
| H | 7.527  | 38.304 | 35.219 |
| H | 6.496  | 37.686 | 36.139 |
| O | 2.472  | 37.973 | 34.636 |
| H | 2.266  | 37.269 | 34.021 |
| H | 2.803  | 38.683 | 34.086 |
| O | 7.562  | 47.316 | 36.939 |
| H | 8.318  | 47.018 | 37.445 |
| H | 6.825  | 47.243 | 37.546 |
| O | 1.16   | 43.222 | 34.274 |
| H | 1.558  | 43.068 | 33.417 |
| H | 1.88   | 43.539 | 34.819 |
| O | -5.947 | 37.318 | 30.17  |
| H | -6.202 | 37.953 | 29.501 |
| H | -6.598 | 37.426 | 30.863 |
| O | 11.284 | 30.536 | 27.96  |
| H | 10.878 | 29.866 | 28.509 |
| H | 11.576 | 30.063 | 27.181 |
| O | 13.38  | 46.154 | 48.421 |
| H | 13.429 | 45.589 | 49.193 |
| H | 14.057 | 46.815 | 48.565 |
| O | 17.812 | 42.99  | 48.512 |
| H | 16.892 | 42.942 | 48.772 |
| H | 17.844 | 43.703 | 47.875 |
| O | 7.28   | 45.538 | 39.811 |
| H | 7.43   | 46.262 | 40.42  |
| H | 6.392  | 45.682 | 39.482 |
| O | 3.123  | 47.726 | 28.361 |
| H | 2.654  | 48.502 | 28.055 |
| H | 3.718  | 47.507 | 27.643 |
| O | 7.339  | 51.474 | 31.478 |
| H | 8.274  | 51.652 | 31.58  |
| H | 7.203  | 50.64  | 31.928 |
| O | 9.929  | 45.458 | 43.809 |
| H | 10.545 | 46.16  | 43.597 |
| H | 9.275  | 45.874 | 44.37  |
| O | 14.825 | 24.929 | 37.073 |
| H | 14.811 | 25.166 | 38.001 |
| H | 14.934 | 25.762 | 36.615 |
| O | 5.311  | 28.681 | 46.152 |
| H | 6.112  | 29.067 | 46.506 |
| H | 5.062  | 28.015 | 46.794 |
| O | 5.894  | 33.252 | 39.107 |
| H | 6.74   | 33.219 | 39.553 |
| H | 5.89   | 34.101 | 38.664 |
| O | 5.392  | 35.853 | 44.144 |
| H | 6.02   | 35.681 | 43.442 |
| H | 4.607  | 35.368 | 43.888 |

|   |        |        |        |
|---|--------|--------|--------|
| O | 1.905  | 29.253 | 34.53  |
| H | 1.101  | 28.903 | 34.147 |
| H | 2.289  | 28.512 | 34.999 |
| O | -1.413 | 29.781 | 43.451 |
| H | -0.614 | 30.306 | 43.503 |
| H | -1.45  | 29.319 | 44.289 |
| O | 10.757 | 35.957 | 30.771 |
| H | 10.774 | 36.603 | 30.065 |
| H | 10.674 | 36.478 | 31.57  |
| O | 0.548  | 33.277 | 45.731 |
| H | 0.976  | 33.013 | 46.545 |
| H | 0.322  | 34.197 | 45.866 |
| O | 7.744  | 32.358 | 35.998 |
| H | 6.952  | 31.936 | 35.664 |
| H | 7.46   | 33.237 | 36.248 |
| O | 0.85   | 32.951 | 48.451 |
| H | 1.782  | 32.96  | 48.233 |
| H | 0.77   | 33.555 | 49.189 |
| O | 5.502  | 32.234 | 44.296 |
| H | 5.418  | 32.299 | 43.345 |
| H | 4.994  | 31.456 | 44.528 |
| O | -1.933 | 36.152 | 39.368 |
| H | -1.134 | 36.568 | 39.045 |
| H | -1.658 | 35.27  | 39.622 |
| O | 3.829  | 34.013 | 24.959 |
| H | 3.492  | 33.268 | 25.456 |
| H | 3.234  | 34.732 | 25.174 |
| O | 8.987  | 43.64  | 38.664 |
| H | 8.625  | 44.463 | 38.994 |
| H | 9.914  | 43.676 | 38.9   |
| O | 7.948  | 31.078 | 43.314 |
| H | 7.962  | 30.127 | 43.422 |
| H | 7.123  | 31.352 | 43.715 |
| O | 0.156  | 43.346 | 41.234 |
| H | -0.579 | 43.831 | 40.859 |
| H | -0.24  | 42.553 | 41.597 |
| O | 9.689  | 41.443 | 37.29  |
| H | 10.168 | 41.747 | 36.52  |
| H | 9.277  | 42.232 | 37.643 |
| O | -0.477 | 33.15  | 33.689 |
| H | 0.174  | 32.986 | 34.371 |
| H | 0.039  | 33.318 | 32.9   |
| O | 6.868  | 34.532 | 42.221 |
| H | 6.255  | 33.844 | 41.959 |
| H | 7.613  | 34.06  | 42.592 |
| O | 10.312 | 35.17  | 27.53  |
| H | 9.483  | 35.165 | 27.052 |

|   |        |        |        |
|---|--------|--------|--------|
| H | 10.38  | 34.29  | 27.9   |
| O | -0.527 | 46.073 | 28.895 |
| H | 0.243  | 45.521 | 28.76  |
| H | -0.817 | 46.301 | 28.012 |
| O | 3.461  | 46.807 | 40.989 |
| H | 3.09   | 45.966 | 40.722 |
| H | 2.808  | 47.453 | 40.721 |
| O | 6.73   | 37.072 | 40.945 |
| H | 6.954  | 36.431 | 41.62  |
| H | 7.558  | 37.508 | 40.745 |
| O | 20.14  | 38.853 | 47.73  |
| H | 19.787 | 39.438 | 47.06  |
| H | 20.745 | 38.283 | 47.257 |
| O | 10.487 | 42.026 | 28.915 |
| H | 9.7    | 42.204 | 29.429 |
| H | 10.159 | 41.795 | 28.046 |
| O | 3.053  | 34.766 | 43.329 |
| H | 3.512  | 34.728 | 42.49  |
| H | 2.126  | 34.799 | 43.094 |
| O | -4.389 | 41.451 | 40.821 |
| H | -4.066 | 40.592 | 41.092 |
| H | -4.145 | 41.519 | 39.898 |
| O | 0.82   | 40.693 | 36.927 |
| H | 1.203  | 41.311 | 37.549 |
| H | -0.118 | 40.882 | 36.948 |
| O | 0.536  | 47.647 | 42.736 |
| H | 0.054  | 47.459 | 41.931 |
| H | 0.018  | 48.322 | 43.173 |
| O | 4.564  | 38.494 | 43.089 |
| H | 5.39   | 38.523 | 42.607 |
| H | 4.562  | 37.634 | 43.51  |
| O | 9.701  | 45.946 | 35.193 |
| H | 8.747  | 45.878 | 35.224 |
| H | 9.999  | 45.053 | 35.017 |
| O | 8.133  | 45.762 | 46.264 |
| H | 8.485  | 45.141 | 46.903 |
| H | 7.69   | 45.214 | 45.617 |
| O | 3.966  | 39.049 | 38.816 |
| H | 4.638  | 39.431 | 38.251 |
| H | 3.362  | 38.617 | 38.213 |
| O | 0.046  | 43.187 | 47.877 |
| H | 0.446  | 42.496 | 47.349 |
| H | -0.682 | 42.755 | 48.324 |
| O | 7.398  | 33.456 | 45.768 |
| H | 6.632  | 33.287 | 45.22  |
| H | 7.254  | 34.337 | 46.114 |
| O | 11.261 | 31.144 | 32.165 |



|   |        |        |        |
|---|--------|--------|--------|
| H | 10.367 | 30.984 | 32.466 |
| H | 11.205 | 31.963 | 31.672 |
| O | 2.451  | 49.028 | 39.706 |
| H | 2.262  | 49.116 | 38.772 |
| H | 2.152  | 49.852 | 40.09  |
| O | -0.028 | 33.224 | 40.802 |
| H | -0.843 | 33.117 | 40.312 |
| H | 0.652  | 32.905 | 40.209 |
| O | 1.966  | 34.184 | 50.957 |
| H | 1.965  | 34.992 | 50.444 |
| H | 2.364  | 34.431 | 51.792 |
| O | 4.441  | 40.475 | 28.664 |
| H | 3.685  | 40.28  | 29.218 |
| H | 5.194  | 40.171 | 29.17  |
| O | -3.142 | 50.3   | 42.765 |
| H | -4.088 | 50.441 | 42.798 |
| H | -3.032 | 49.543 | 42.188 |
| O | 14.673 | 34.082 | 37.854 |
| H | 13.861 | 33.742 | 38.228 |
| H | 14.656 | 35.018 | 38.054 |
| O | 17.8   | 40.515 | 32.654 |
| H | 17.959 | 39.975 | 33.428 |
| H | 18.249 | 41.339 | 32.841 |
| O | 8.128  | 49.98  | 35.777 |
| H | 7.831  | 49.166 | 36.182 |
| H | 7.565  | 50.655 | 36.156 |
| O | 3.689  | 41.295 | 35.348 |
| H | 3.88   | 41.041 | 36.251 |
| H | 2.752  | 41.489 | 35.347 |
| O | 4.881  | 45.794 | 49.237 |
| H | 4.169  | 46.371 | 49.514 |
| H | 4.475  | 45.198 | 48.607 |
| O | 8.341  | 48.208 | 49.695 |
| H | 8.977  | 47.546 | 49.964 |
| H | 7.841  | 48.397 | 50.489 |
| O | 18.441 | 41.238 | 35.789 |
| H | 18.905 | 40.401 | 35.776 |
| H | 18.814 | 41.73  | 35.058 |
| O | -3.312 | 38.598 | 26.121 |
| H | -4.158 | 38.193 | 26.311 |
| H | -3.389 | 39.488 | 26.464 |
| O | -3.412 | 38.437 | 43.105 |
| H | -2.497 | 38.345 | 43.371 |
| H | -3.907 | 37.999 | 43.797 |
| O | 7.095  | 43.986 | 34.497 |
| H | 6.566  | 43.374 | 35.008 |
| H | 7.651  | 43.427 | 33.954 |

|   |        |        |        |
|---|--------|--------|--------|
| O | 10.212 | 42.65  | 50.357 |
| H | 10.737 | 41.851 | 50.4   |
| H | 10.07  | 42.893 | 51.272 |
| O | 4.79   | 41.157 | 25.625 |
| H | 3.969  | 40.812 | 25.975 |
| H | 5.409  | 41.084 | 26.352 |
| O | 7.14   | 45.651 | 28.558 |
| H | 6.98   | 44.709 | 28.5   |
| H | 6.96   | 45.868 | 29.473 |
| O | 3.56   | 44.044 | 47.514 |
| H | 3.038  | 44.396 | 46.793 |
| H | 3.013  | 43.354 | 47.89  |
| O | 9.044  | 34.768 | 51.852 |
| H | 9.534  | 34.213 | 51.245 |
| H | 9.609  | 34.838 | 52.622 |
| O | 5.456  | 33.699 | 48.155 |
| H | 5.793  | 32.971 | 48.678 |
| H | 4.672  | 33.347 | 47.732 |
| O | -2.953 | 38.997 | 46.765 |
| H | -2.412 | 38.265 | 46.47  |
| H | -3.181 | 38.778 | 47.669 |
| O | 6.943  | 39.77  | 44.521 |
| H | 6.005  | 39.872 | 44.686 |
| H | 7.171  | 40.518 | 43.969 |
| O | 11.661 | 36.644 | 51.363 |
| H | 11.602 | 35.723 | 51.616 |
| H | 10.834 | 36.822 | 50.914 |
| O | 2.246  | 35.772 | 46.201 |
| H | 2.604  | 35.311 | 45.442 |
| H | 2.204  | 36.688 | 45.927 |
| O | 7.042  | 36.234 | 46.301 |
| H | 6.503  | 36.212 | 45.51  |
| H | 6.413  | 36.19  | 47.021 |
| O | 2.577  | 26.98  | 35.455 |
| H | 2.952  | 26.262 | 34.944 |
| H | 2.938  | 26.863 | 36.334 |
| O | -5.73  | 51.126 | 42.9   |
| H | -5.941 | 51.873 | 42.338 |
| H | -5.888 | 51.443 | 43.789 |
| O | -0.603 | 28.888 | 28.568 |
| H | -0.018 | 28.462 | 27.942 |
| H | -1.014 | 28.165 | 29.042 |
| O | -3.28  | 41.269 | 38.358 |
| H | -3.258 | 40.647 | 37.631 |
| H | -2.513 | 41.825 | 38.22  |
| O | 12.665 | 46.597 | 39.463 |
| H | 13.307 | 46.783 | 38.777 |

|   |        |        |        |
|---|--------|--------|--------|
| H | 12.681 | 47.374 | 40.022 |
| O | 13.848 | 43.785 | 32.356 |
| H | 14.402 | 43.468 | 31.642 |
| H | 12.961 | 43.528 | 32.103 |
| O | 8.939  | 38.983 | 36.097 |
| H | 8.999  | 39.856 | 36.484 |
| H | 9.468  | 39.037 | 35.301 |
| O | 15.084 | 38.04  | 36.373 |
| H | 14.999 | 37.985 | 37.325 |
| H | 15.981 | 37.755 | 36.196 |
| O | 7.585  | 43.077 | 45.103 |
| H | 7.1    | 43.352 | 44.325 |
| H | 7.119  | 42.301 | 45.414 |
| O | 8.057  | 38.231 | 27.05  |
| H | 7.969  | 37.306 | 26.818 |
| H | 7.339  | 38.393 | 27.661 |
| O | 8.333  | 33.716 | 33.218 |
| H | 8.406  | 33.753 | 32.264 |
| H | 8.505  | 32.8   | 33.435 |
| O | 11.915 | 30.121 | 25.041 |
| H | 12.192 | 29.206 | 25.089 |
| H | 11.873 | 30.31  | 24.104 |
| O | 10.913 | 40.218 | 39.355 |
| H | 10.349 | 40.728 | 38.773 |
| H | 10.992 | 40.756 | 40.143 |
| O | 0.852  | 31     | 50.852 |
| H | 0.659  | 30.299 | 51.474 |
| H | 0.643  | 31.805 | 51.326 |
| O | 17.548 | 40.528 | 39.017 |
| H | 16.655 | 40.641 | 38.691 |
| H | 17.832 | 39.69  | 38.653 |
| O | 12.616 | 36.362 | 37.346 |
| H | 13.116 | 37.069 | 37.756 |
| H | 11.724 | 36.48  | 37.671 |
| O | 8.017  | 42.261 | 30.315 |
| H | 7.322  | 42.824 | 29.973 |
| H | 8.169  | 42.581 | 31.204 |
| O | 14.092 | 33.577 | 32.531 |
| H | 14.113 | 34.534 | 32.523 |
| H | 14.101 | 33.346 | 33.46  |
| O | 7.356  | 35.238 | 36.415 |
| H | 6.427  | 35.462 | 36.478 |
| H | 7.64   | 35.627 | 35.588 |
| O | 15.908 | 31.018 | 29.582 |
| H | 16.68  | 30.952 | 29.021 |
| H | 16.157 | 31.647 | 30.259 |
| O | 8.576  | 38.059 | 32.427 |

|   |        |        |        |
|---|--------|--------|--------|
| H | 9.475  | 38.314 | 32.22  |
| H | 8.666  | 37.426 | 33.14  |
| O | 13.476 | 45.748 | 42.411 |
| H | 13.51  | 45.28  | 43.245 |
| H | 12.77  | 46.385 | 42.522 |
| O | -1.256 | 41.282 | 42.395 |
| H | -1.312 | 40.397 | 42.034 |
| H | -2.001 | 41.344 | 42.993 |
| O | 1.591  | 24.887 | 48.216 |
| H | 1.938  | 24.558 | 47.387 |
| H | 1.784  | 24.195 | 48.848 |
| O | 4.232  | 28.882 | 53.015 |
| H | 3.553  | 29.306 | 53.538 |
| H | 3.859  | 28.83  | 52.135 |
| O | 7.139  | 47.188 | 42.051 |
| H | 7.171  | 47.955 | 42.623 |
| H | 7.035  | 46.448 | 42.649 |
| O | 15.049 | 31.207 | 39.6   |
| H | 14.66  | 30.818 | 38.817 |
| H | 14.484 | 30.917 | 40.317 |
| O | 8.797  | 32.23  | 47.815 |
| H | 8.041  | 31.872 | 48.282 |
| H | 8.438  | 32.544 | 46.985 |
| O | 15.1   | 49.93  | 37.368 |
| H | 15.702 | 50.279 | 38.027 |
| H | 14.655 | 50.702 | 37.018 |
| O | 10.245 | 47.848 | 38.654 |
| H | 10.834 | 47.144 | 38.925 |
| H | 10.539 | 48.081 | 37.774 |
| O | -0.005 | 35.804 | 42.44  |
| H | 0.121  | 35.214 | 41.696 |
| H | -0.843 | 35.536 | 42.818 |
| O | 5.334  | 30.821 | 35.44  |
| H | 5.583  | 30.059 | 34.916 |
| H | 5.135  | 31.499 | 34.795 |
| O | 14.724 | 31.676 | 27.289 |
| H | 13.817 | 31.374 | 27.342 |
| H | 15.064 | 31.571 | 28.177 |
| O | 3.875  | 33.465 | 34.099 |
| H | 4.54   | 34.104 | 33.844 |
| H | 3.983  | 32.746 | 33.476 |
| O | 8.824  | 30.895 | 33.038 |
| H | 8.673  | 30.553 | 33.919 |
| H | 8.036  | 30.656 | 32.551 |
| O | 6.955  | 28.59  | 34.127 |
| H | 6.741  | 27.744 | 34.522 |
| H | 7.792  | 28.833 | 34.523 |

|   |        |        |        |
|---|--------|--------|--------|
| O | 1.524  | 41.192 | 43.498 |
| H | 0.702  | 40.964 | 43.065 |
| H | 2.167  | 41.221 | 42.789 |
| O | 6.564  | 39.778 | 30.219 |
| H | 7.038  | 40.592 | 30.388 |
| H | 6.796  | 39.209 | 30.953 |
| O | 9.615  | 26.132 | 46.526 |
| H | 10.545 | 26.345 | 46.612 |
| H | 9.475  | 26.045 | 45.583 |
| O | 3.433  | 45.943 | 44.678 |
| H | 2.689  | 45.438 | 44.351 |
| H | 3.354  | 46.793 | 44.244 |
| O | 3.505  | 38.031 | 16.879 |
| H | 2.601  | 38.057 | 17.193 |
| H | 3.749  | 38.951 | 16.777 |
| O | 0.74   | 33.656 | 31.348 |
| H | 0.735  | 32.735 | 31.09  |
| H | 1.569  | 33.995 | 31.008 |
| O | 5.396  | 40.748 | 13.847 |
| H | 4.691  | 41.1   | 13.304 |
| H | 6.169  | 41.252 | 13.593 |
| O | 3.973  | 48.519 | 23.782 |
| H | 3.569  | 48.995 | 23.057 |
| H | 4.493  | 49.178 | 24.242 |
| O | 2.445  | 38.528 | 13.111 |
| H | 2.902  | 39.008 | 13.801 |
| H | 2.859  | 37.665 | 13.105 |
| O | 4.918  | 31.343 | 22.94  |
| H | 4.145  | 31.574 | 22.425 |
| H | 5.657  | 31.534 | 22.362 |
| O | 5.805  | 30.654 | 25.39  |
| H | 6.65   | 30.699 | 24.943 |
| H | 5.184  | 31.033 | 24.767 |
| O | 17.219 | 35.674 | 22.629 |
| H | 16.517 | 35.722 | 23.278 |
| H | 17.202 | 34.767 | 22.323 |
| O | 3.656  | 43.131 | 6.426  |
| H | 3.555  | 43.711 | 7.18   |
| H | 4.522  | 43.34  | 6.076  |
| O | 8.493  | 37.742 | 15.171 |
| H | 9.142  | 37.54  | 14.497 |
| H | 7.666  | 37.815 | 14.694 |
| O | 3.598  | 40.756 | 19.415 |
| H | 3.185  | 41.313 | 20.075 |
| H | 3.231  | 39.886 | 19.573 |
| O | 11.629 | 33.01  | 20.17  |
| H | 10.717 | 33.038 | 19.882 |

|   |        |        |        |
|---|--------|--------|--------|
| H | 12.109 | 32.672 | 19.414 |
| O | 3.013  | 30.17  | 19.963 |
| H | 3.421  | 30.951 | 19.589 |
| H | 3.555  | 29.445 | 19.651 |
| O | 2.52   | 49.989 | 22.157 |
| H | 1.835  | 50.474 | 22.619 |
| H | 2.498  | 50.336 | 21.265 |
| O | 2.527  | 38.002 | 20.247 |
| H | 3.028  | 38.191 | 21.041 |
| H | 1.825  | 37.421 | 20.54  |
| O | 7.171  | 38.973 | 24.271 |
| H | 7.289  | 38.826 | 25.21  |
| H | 6.222  | 38.961 | 24.144 |
| O | 0.459  | 36.049 | 20.239 |
| H | 1.387  | 35.846 | 20.124 |
| H | 0.018  | 35.556 | 19.547 |
| O | 5.289  | 33.731 | 10.119 |
| H | 5.212  | 34.212 | 10.943 |
| H | 4.744  | 34.222 | 9.503  |
| O | 10.616 | 44.243 | 16.092 |
| H | 10.09  | 43.661 | 16.641 |
| H | 11.521 | 43.989 | 16.273 |
| O | -0.015 | 37.178 | 13.126 |
| H | 0.048  | 36.487 | 12.466 |
| H | 0.365  | 37.948 | 12.703 |
| O | 9.686  | 34.466 | 23.419 |
| H | 9.071  | 35.127 | 23.737 |
| H | 10.001 | 34.03  | 24.211 |
| O | 5.636  | 43.621 | 21.733 |
| H | 4.772  | 43.516 | 21.335 |
| H | 6.045  | 44.329 | 21.236 |
| O | 11.929 | 39.203 | 16.541 |
| H | 12.475 | 39.841 | 17     |
| H | 11.034 | 39.519 | 16.667 |
| O | 6.321  | 34.774 | 15.934 |
| H | 5.366  | 34.777 | 15.873 |
| H | 6.519  | 35.401 | 16.63  |
| O | 6.577  | 27.928 | 8.614  |
| H | 6.086  | 27.732 | 7.816  |
| H | 7.487  | 27.995 | 8.325  |
| O | 14.623 | 41.233 | 22.018 |
| H | 14.045 | 41.622 | 22.676 |
| H | 14.048 | 41.04  | 21.278 |
| O | 10.591 | 43.457 | 34.778 |
| H | 11.39  | 43.656 | 35.265 |
| H | 10.896 | 43.239 | 33.897 |
| O | 6.601  | 48.223 | 27.629 |

|   |        |        |        |
|---|--------|--------|--------|
| H | 6.807  | 47.523 | 28.248 |
| H | 5.83   | 47.907 | 27.158 |
| O | 2.96   | 47.661 | 14.921 |
| H | 2.934  | 47.658 | 15.878 |
| H | 2.526  | 46.847 | 14.667 |
| O | 4.572  | 43.692 | 18.164 |
| H | 5.525  | 43.728 | 18.085 |
| H | 4.416  | 43.378 | 19.055 |
| O | 7.489  | 49.165 | 21.645 |
| H | 7.005  | 49.977 | 21.496 |
| H | 7.968  | 49.018 | 20.829 |
| O | 10.763 | 38.93  | 30.978 |
| H | 10.705 | 38.769 | 30.036 |
| H | 11.399 | 39.64  | 31.061 |
| O | 5.942  | 25.045 | 26.357 |
| H | 6.352  | 24.242 | 26.679 |
| H | 5.136  | 25.123 | 26.866 |
| O | 6.153  | 31.675 | 27.879 |
| H | 6.026  | 30.933 | 28.469 |
| H | 6.021  | 31.311 | 27.004 |
| O | 0.35   | 34.413 | 23.05  |
| H | 0.407  | 35.124 | 23.688 |
| H | -0.033 | 34.819 | 22.272 |
| O | -3.514 | 35.526 | 16.818 |
| H | -3.119 | 35.047 | 16.09  |
| H | -4.057 | 34.876 | 17.266 |
| O | -7.761 | 35.978 | 24.016 |
| H | -8.701 | 35.8   | 24.04  |
| H | -7.386 | 35.225 | 23.56  |
| O | 12.525 | 34.636 | 17.546 |
| H | 12.741 | 35.161 | 18.318 |
| H | 11.89  | 35.168 | 17.066 |
| O | -2.451 | 41.048 | 33.689 |
| H | -2.577 | 41.445 | 32.827 |
| H | -1.947 | 40.253 | 33.515 |
| O | 8.986  | 31.379 | 12.841 |
| H | 9.171  | 31.761 | 11.982 |
| H | 8.256  | 31.897 | 13.181 |
| O | 5.821  | 31.522 | 19.172 |
| H | 6.196  | 31.027 | 19.9   |
| H | 6.278  | 31.194 | 18.398 |
| O | 3.823  | 33.148 | 18.211 |
| H | 3.692  | 33.925 | 18.754 |
| H | 4.478  | 32.634 | 18.683 |
| O | 2.422  | 32.683 | 21.925 |
| H | 1.933  | 33.293 | 22.478 |
| H | 1.749  | 32.157 | 21.495 |

|   |        |        |        |
|---|--------|--------|--------|
| O | 1.985  | 34.098 | 16.295 |
| H | 2.588  | 33.802 | 16.978 |
| H | 1.41   | 34.723 | 16.738 |
| O | 4.457  | 28.107 | 19.137 |
| H | 5.151  | 27.905 | 19.765 |
| H | 4.921  | 28.314 | 18.326 |
| O | 8.309  | 34.175 | 30.62  |
| H | 9.176  | 34.493 | 30.369 |
| H | 7.816  | 34.151 | 29.799 |
| O | -6.245 | 43.266 | 21.197 |
| H | -5.878 | 43.952 | 20.639 |
| H | -5.748 | 42.481 | 20.969 |
| O | 3.611  | 30.323 | 30.615 |
| H | 4.495  | 30.112 | 30.313 |
| H | 3.273  | 30.933 | 29.959 |
| O | 3.896  | 30.707 | 13.452 |
| H | 4.29   | 30.135 | 14.111 |
| H | 3.814  | 30.156 | 12.674 |
| O | 5.019  | 39.61  | 33.3   |
| H | 5.347  | 38.942 | 33.901 |
| H | 4.784  | 40.346 | 33.865 |
| O | 13.334 | 41.26  | 12.139 |
| H | 13.441 | 40.425 | 12.593 |
| H | 13.908 | 41.864 | 12.611 |
| O | 3.043  | 43.312 | 20.621 |
| H | 2.419  | 43.37  | 21.345 |
| H | 2.521  | 43.498 | 19.84  |
| O | 3.388  | 45.851 | 34.161 |
| H | 3.045  | 46.738 | 34.058 |
| H | 4.131  | 45.81  | 33.559 |
| O | 6.309  | 31.427 | 10.916 |
| H | 5.817  | 32.192 | 10.619 |
| H | 6.997  | 31.787 | 11.476 |
| O | 3.545  | 36.005 | 28.604 |
| H | 2.666  | 35.887 | 28.963 |
| H | 4.121  | 35.98  | 29.368 |
| O | 1.638  | 49.64  | 18.024 |
| H | 2.008  | 48.787 | 17.796 |
| H | 0.691  | 49.51  | 17.982 |
| O | 5.865  | 36.889 | 17.893 |
| H | 5.914  | 37.338 | 18.738 |
| H | 5.281  | 37.434 | 17.366 |
| O | 4.758  | 47.181 | 19.846 |
| H | 4.364  | 46.687 | 20.565 |
| H | 4.164  | 47.044 | 19.108 |
| O | 0.09   | 41.167 | 21.69  |
| H | 0.684  | 41.375 | 22.411 |



|   |        |        |        |
|---|--------|--------|--------|
| H | -0.27  | 40.31  | 21.917 |
| O | 3.581  | 43.267 | 24.16  |
| H | 4.263  | 43.819 | 23.778 |
| H | 4.06   | 42.567 | 24.603 |
| O | 0.837  | 40.386 | 24.336 |
| H | 1.346  | 40.43  | 25.145 |
| H | 0.829  | 39.456 | 24.109 |
| O | 10.226 | 44.493 | 12.995 |
| H | 10.511 | 44.346 | 13.897 |
| H | 9.758  | 45.328 | 13.026 |
| O | 9.128  | 45.154 | 31.598 |
| H | 9.625  | 45.955 | 31.761 |
| H | 8.212  | 45.433 | 31.609 |
| O | 4.165  | 40.514 | 16.498 |
| H | 4.788  | 40.957 | 15.921 |
| H | 4.405  | 40.806 | 17.378 |
| O | 6.422  | 42.834 | 28.017 |
| H | 7.159  | 42.383 | 27.606 |
| H | 5.896  | 42.132 | 28.402 |
| O | 6.138  | 30.175 | 32.049 |
| H | 5.181  | 30.187 | 32.04  |
| H | 6.363  | 29.485 | 32.672 |
| O | 6.792  | 29.002 | 17.768 |
| H | 7.649  | 28.665 | 18.029 |
| H | 6.989  | 29.774 | 17.238 |
| O | 0.905  | 51.153 | 15.154 |
| H | 1.46   | 50.55  | 14.661 |
| H | 0.309  | 50.585 | 15.643 |
| O | 8.585  | 32.934 | 21.333 |
| H | 9.028  | 33.227 | 22.129 |
| H | 8.183  | 33.727 | 20.977 |
| O | -5.564 | 41.558 | 26.119 |
| H | -5.832 | 42.333 | 26.614 |
| H | -6.007 | 41.648 | 25.275 |
| O | 5.535  | 26.305 | 15.736 |
| H | 6.253  | 25.751 | 16.042 |
| H | 5.039  | 26.514 | 16.528 |
| O | 1.204  | 47.252 | 22.817 |
| H | 1.982  | 47.781 | 22.638 |
| H | 0.883  | 47.576 | 23.658 |
| O | 14.952 | 38.028 | 32.87  |
| H | 15.871 | 37.79  | 32.996 |
| H | 14.958 | 38.617 | 32.116 |
| O | 9.185  | 40.487 | 8.66   |
| H | 8.372  | 39.986 | 8.73   |
| H | 9.858  | 39.828 | 8.49   |
| O | 8.708  | 46.867 | 18.998 |

|   |        |        |        |
|---|--------|--------|--------|
| H | 8.2    | 47.666 | 19.136 |
| H | 9.596  | 47.097 | 19.271 |
| O | 7.141  | 43.421 | 18.657 |
| H | 7.662  | 43.514 | 19.454 |
| H | 7.751  | 43.058 | 18.014 |
| O | 7.413  | 49.154 | 33.177 |
| H | 7.672  | 49.438 | 34.054 |
| H | 7.322  | 48.204 | 33.249 |
| O | 8.8    | 40.769 | 23.164 |
| H | 8.279  | 41.536 | 23.403 |
| H | 8.328  | 40.031 | 23.549 |
| O | 8.646  | 45.943 | 10.347 |
| H | 8.593  | 45.23  | 9.711  |
| H | 8.264  | 46.696 | 9.895  |
| O | 4.318  | 36.876 | 4.652  |
| H | 4.425  | 36.526 | 3.767  |
| H | 3.477  | 37.333 | 4.628  |
| O | -1.539 | 45.027 | 31.343 |
| H | -0.822 | 45.346 | 31.891 |
| H | -1.493 | 45.564 | 30.552 |
| O | 6.33   | 37.94  | 13.415 |
| H | 6.013  | 38.81  | 13.655 |
| H | 6.817  | 38.078 | 12.602 |
| O | 8.288  | 41.782 | 26.674 |
| H | 8.821  | 41.001 | 26.519 |
| H | 8.498  | 42.364 | 25.944 |
| O | -2.491 | 47.142 | 8.728  |
| H | -2.843 | 47.305 | 9.603  |
| H | -2.843 | 47.852 | 8.192  |
| O | 3.001  | 39.253 | 9.607  |
| H | 3.746  | 39.165 | 10.202 |
| H | 3.29   | 39.891 | 8.955  |
| O | 6.291  | 34.107 | 28.538 |
| H | 6.174  | 33.252 | 28.125 |
| H | 5.516  | 34.215 | 29.09  |
| O | 2.431  | 40.614 | 26.519 |
| H | 2.77   | 40.207 | 27.316 |
| H | 2.277  | 41.527 | 26.764 |
| O | 3.119  | 35.426 | 19.315 |
| H | 3.281  | 35.211 | 20.234 |
| H | 3.521  | 36.286 | 19.195 |
| O | 0.388  | 42.695 | 27.19  |
| H | 0.153  | 43.025 | 26.322 |
| H | 0.671  | 43.472 | 27.672 |
| O | 1.626  | 38.116 | 37.213 |
| H | 1.303  | 39.017 | 37.202 |
| H | 1.951  | 37.967 | 36.326 |

|   |        |        |        |
|---|--------|--------|--------|
| O | 3.466  | 39.011 | 22.893 |
| H | 3.733  | 38.558 | 23.693 |
| H | 3.263  | 39.901 | 23.179 |
| O | 3.789  | 35.444 | 22.147 |
| H | 3.691  | 34.53  | 22.414 |
| H | 3.907  | 35.921 | 22.968 |
| O | 0.087  | 33.453 | 27.559 |
| H | -0.482 | 32.693 | 27.684 |
| H | -0.374 | 33.996 | 26.921 |
| O | 0.504  | 30.987 | 20.915 |
| H | 0.218  | 30.168 | 21.32  |
| H | 1.223  | 30.729 | 20.338 |
| O | 1.648  | 43.254 | 37.929 |
| H | 2.585  | 43.185 | 38.115 |
| H | 1.469  | 44.194 | 37.948 |
| O | -2.315 | 35.153 | 13.868 |
| H | -1.757 | 35.783 | 14.325 |
| H | -1.718 | 34.452 | 13.605 |
| O | -2.947 | 50.252 | 14.064 |
| H | -3.041 | 50.98  | 13.45  |
| H | -3.035 | 50.654 | 14.928 |
| O | 13.167 | 47.268 | 20.118 |
| H | 13.627 | 48.067 | 19.859 |
| H | 12.918 | 46.857 | 19.291 |
| O | 5.461  | 48.248 | 16.376 |
| H | 5.212  | 47.831 | 15.551 |
| H | 5.752  | 47.525 | 16.931 |
| O | 10.217 | 37.294 | 7.518  |
| H | 10.798 | 37.98  | 7.847  |
| H | 10.69  | 36.915 | 6.777  |
| O | 6.785  | 34.555 | 24.544 |
| H | 7.231  | 33.962 | 25.149 |
| H | 5.859  | 34.328 | 24.623 |
| O | -3.268 | 37.046 | 30.64  |
| H | -3.072 | 36.142 | 30.887 |
| H | -4.216 | 37.058 | 30.506 |
| O | 15.188 | 40.704 | 31.588 |
| H | 15.417 | 40.68  | 30.659 |
| H | 16.028 | 40.639 | 32.044 |
| O | 2.823  | 42.452 | 12.744 |
| H | 2.818  | 43.396 | 12.906 |
| H | 2.333  | 42.347 | 11.929 |
| O | 8.232  | 32.904 | 26.064 |
| H | 9.15   | 32.669 | 25.924 |
| H | 7.97   | 32.398 | 26.833 |
| O | 14.835 | 35.142 | 23.987 |
| H | 14.224 | 34.967 | 24.703 |

|   |        |        |        |
|---|--------|--------|--------|
| H | 14.543 | 34.571 | 23.277 |
| O | 5.859  | 32.737 | 31.224 |
| H | 6.712  | 33.128 | 31.035 |
| H | 6.059  | 31.835 | 31.474 |
| O | 15.81  | 39.738 | 13.958 |
| H | 16.132 | 40.045 | 13.11  |
| H | 16.283 | 40.268 | 14.599 |
| O | 10.801 | 32.44  | 25.546 |
| H | 11.397 | 33.185 | 25.463 |
| H | 11.351 | 31.674 | 25.38  |
| O | 10.596 | 37.129 | 13.009 |
| H | 10.752 | 37.262 | 12.074 |
| H | 11.093 | 37.826 | 13.437 |
| O | 15.093 | 28.849 | 17.483 |
| H | 15.827 | 29.195 | 17.991 |
| H | 15.495 | 28.503 | 16.686 |
| O | 3.373  | 26.228 | 27.454 |
| H | 2.419  | 26.209 | 27.376 |
| H | 3.591  | 27.159 | 27.495 |
| O | 14.99  | 22.615 | 9.925  |
| H | 14.972 | 22.466 | 8.979  |
| H | 14.227 | 22.141 | 10.256 |
| O | 13.231 | 36.127 | 13.428 |
| H | 12.98  | 35.264 | 13.098 |
| H | 12.472 | 36.681 | 13.252 |
| O | 15.019 | 45.095 | 19.729 |
| H | 15.673 | 44.614 | 20.235 |
| H | 14.255 | 45.139 | 20.304 |
| O | 6.139  | 38.19  | 20.408 |
| H | 5.678  | 39.029 | 20.439 |
| H | 6.105  | 37.864 | 21.307 |
| O | -3.524 | 29.837 | 25.106 |
| H | -4.406 | 30.138 | 25.326 |
| H | -3.516 | 28.914 | 25.359 |
| O | 2.088  | 31.868 | 29.066 |
| H | 1.357  | 31.269 | 29.222 |
| H | 1.922  | 32.225 | 28.194 |
| O | 10.394 | 51.008 | 29.032 |
| H | 9.62   | 51.046 | 28.471 |
| H | 10.837 | 51.844 | 28.885 |
| O | 4.037  | 25.159 | 29.879 |
| H | 3.73   | 25.838 | 30.48  |
| H | 3.644  | 25.389 | 29.037 |
| O | 13.96  | 33.918 | 21.324 |
| H | 13.976 | 34.849 | 21.099 |
| H | 13.168 | 33.584 | 20.903 |
| O | 11.438 | 50.377 | 21.79  |

|   |        |        |        |
|---|--------|--------|--------|
| H | 12.26  | 50.712 | 21.432 |
| H | 11.615 | 50.256 | 22.723 |
| O | -0.497 | 43.843 | 24.915 |
| H | -0.06  | 43.885 | 24.065 |
| H | -1.418 | 43.687 | 24.704 |
| O | 7.064  | 36.889 | 30.052 |
| H | 7.514  | 36.242 | 29.508 |
| H | 7.705  | 37.123 | 30.724 |
| O | 9.352  | 28.579 | 18.734 |
| H | 9.02   | 27.867 | 19.281 |
| H | 10.304 | 28.522 | 18.818 |
| O | 6.436  | 17.472 | 14.096 |
| H | 6.381  | 17.779 | 13.191 |
| H | 5.768  | 16.789 | 14.157 |
| O | -1.385 | 25.234 | 18.618 |
| H | -1.106 | 24.481 | 18.097 |
| H | -0.796 | 25.233 | 19.373 |
| O | 10.117 | 28.095 | 23.019 |
| H | 9.528  | 28.546 | 23.624 |
| H | 10.836 | 28.712 | 22.88  |
| O | 4.858  | 26.078 | 12.345 |
| H | 4.357  | 26.609 | 12.964 |
| H | 5.591  | 26.638 | 12.088 |
| O | 1.009  | 51.505 | 24.835 |
| H | 0.627  | 51.843 | 25.645 |
| H | 0.576  | 52.002 | 24.141 |
| O | 6.798  | 46.032 | 17.092 |
| H | 7.634  | 46.494 | 17.021 |
| H | 6.864  | 45.541 | 17.911 |
| O | 12.22  | 27.727 | 33.83  |
| H | 11.613 | 27.034 | 33.57  |
| H | 12.185 | 28.358 | 33.111 |
| O | 13.252 | 37.973 | 28.297 |
| H | 12.459 | 38.433 | 28.022 |
| H | 13.933 | 38.297 | 27.707 |
| O | 5.954  | 40.734 | 5.223  |
| H | 5.075  | 40.495 | 5.516  |
| H | 6.29   | 39.942 | 4.804  |
| O | 12.251 | 42.617 | 4.608  |
| H | 13.131 | 42.534 | 4.243  |
| H | 12.133 | 41.824 | 5.131  |
| O | 15.046 | 41.763 | 3.877  |
| H | 15.372 | 42.075 | 4.721  |
| H | 15.045 | 40.809 | 3.958  |
| O | 7.206  | 48.598 | 2.596  |
| H | 6.52   | 49.136 | 2.989  |
| H | 7.589  | 49.155 | 1.918  |

|   |        |        |        |
|---|--------|--------|--------|
| O | 0.241  | 46.796 | 8.736  |
| H | 0.347  | 47.186 | 7.868  |
| H | -0.672 | 46.968 | 8.967  |
| O | 3.88   | 40.973 | -1.299 |
| H | 3.721  | 41.905 | -1.149 |
| H | 3.144  | 40.688 | -1.841 |
| O | 13.581 | 29.141 | 7.769  |
| H | 13.264 | 28.999 | 8.661  |
| H | 13.047 | 29.862 | 7.437  |
| O | 6.608  | 38.167 | 4.783  |
| H | 5.739  | 37.768 | 4.744  |
| H | 7.033  | 37.893 | 3.97   |
| O | 13.917 | 45.544 | 3.716  |
| H | 14.528 | 44.97  | 3.253  |
| H | 13.739 | 45.089 | 4.539  |
| O | 11.571 | 30.91  | 7.315  |
| H | 11.401 | 30.541 | 6.448  |
| H | 11.15  | 30.301 | 7.921  |
| O | 3.483  | 28.784 | 11.432 |
| H | 3.066  | 27.943 | 11.243 |
| H | 4.41   | 28.573 | 11.54  |
| O | 7.175  | 50.615 | 5.412  |
| H | 8.107  | 50.451 | 5.269  |
| H | 7.087  | 51.566 | 5.349  |
| O | 3.084  | 43.863 | -1.7   |
| H | 3.874  | 43.827 | -2.24  |
| H | 2.527  | 44.509 | -2.134 |
| O | 17.046 | 31.942 | 6.351  |
| H | 17.936 | 31.838 | 6.015  |
| H | 16.654 | 31.073 | 6.267  |
| O | 7.512  | 36.435 | 10.649 |
| H | 7.52   | 37.343 | 10.951 |
| H | 7.43   | 36.499 | 9.697  |
| O | 6.512  | 47.355 | 9.259  |
| H | 6.837  | 46.56  | 8.837  |
| H | 6.066  | 47.832 | 8.559  |
| O | 17.517 | 46.469 | 9.518  |
| H | 16.739 | 46.273 | 8.997  |
| H | 18.114 | 45.742 | 9.34   |
| O | 12.919 | 46.004 | 6.546  |
| H | 12.031 | 46.309 | 6.357  |
| H | 12.799 | 45.119 | 6.892  |
| O | 5.688  | 58.222 | 11.562 |
| H | 5.708  | 57.944 | 12.477 |
| H | 5.48   | 59.156 | 11.6   |
| O | 11.636 | 36.669 | 10.488 |
| H | 12.59  | 36.599 | 10.518 |

|   |        |        |        |
|---|--------|--------|--------|
| H | 11.38  | 36.132 | 9.739  |
| O | 3.372  | 35.76  | 9.344  |
| H | 3.388  | 36.089 | 10.243 |
| H | 2.856  | 36.406 | 8.862  |
| O | 13.684 | 32.563 | 8.376  |
| H | 13.839 | 33.259 | 7.738  |
| H | 13.144 | 31.925 | 7.909  |
| O | 7.922  | 35.134 | 19.723 |
| H | 8.257  | 35.3   | 18.842 |
| H | 7.098  | 35.62  | 19.762 |
| O | -2.077 | 34.112 | -5.106 |
| H | -1.975 | 33.905 | -6.035 |
| H | -1.708 | 34.991 | -5.014 |
| O | 1.506  | 41.043 | 15.149 |
| H | 2.064  | 40.951 | 15.921 |
| H | 2.072  | 41.446 | 14.491 |
| O | 1.063  | 29.408 | 12.579 |
| H | 1.261  | 28.478 | 12.682 |
| H | 1.622  | 29.694 | 11.857 |
| O | 7.528  | 36.662 | 7.888  |
| H | 8.391  | 36.913 | 7.559  |
| H | 7.18   | 36.071 | 7.22   |
| O | 9.318  | 29.09  | 5.753  |
| H | 8.427  | 29.411 | 5.891  |
| H | 9.765  | 29.808 | 5.305  |
| O | 3.476  | 29.185 | 1.278  |
| H | 3.399  | 28.254 | 1.071  |
| H | 4.388  | 29.295 | 1.549  |
| O | 4.171  | 26.519 | 0.762  |
| H | 4.951  | 26.677 | 0.23   |
| H | 3.6    | 25.993 | 0.202  |
| O | 0.948  | 45.545 | 14.19  |
| H | 0.777  | 45.035 | 14.982 |
| H | 0.556  | 46.4   | 14.367 |
| O | 12.512 | 42.38  | 1.57   |
| H | 12.432 | 42.043 | 2.463  |
| H | 13.297 | 41.956 | 1.224  |
| O | 5.431  | 43.319 | 10.064 |
| H | 5.851  | 43.538 | 9.232  |
| H | 4.509  | 43.536 | 9.931  |
| O | 5.106  | 49.408 | 3.826  |
| H | 5.714  | 49.751 | 4.481  |
| H | 4.682  | 48.666 | 4.257  |
| O | 5.988  | 45.453 | 14.352 |
| H | 6.146  | 45.643 | 15.277 |
| H | 5.035  | 45.427 | 14.272 |
| O | 10.07  | 50.461 | 5.468  |

|   |        |        |        |
|---|--------|--------|--------|
| H | 10.097 | 49.684 | 6.025  |
| H | 10.034 | 51.195 | 6.081  |
| O | 0.973  | 48.178 | 6.623  |
| H | 1.83   | 48.5   | 6.341  |
| H | 0.35   | 48.807 | 6.258  |
| O | 2.135  | 42.363 | 3.225  |
| H | 1.728  | 41.799 | 2.568  |
| H | 2.775  | 41.8   | 3.661  |
| O | 8.529  | 50.407 | 1.015  |
| H | 8.511  | 51.286 | 0.637  |
| H | 9.199  | 50.454 | 1.697  |
| O | -3.453 | 38.703 | 9.04   |
| H | -4.196 | 38.855 | 9.624  |
| H | -2.802 | 38.266 | 9.589  |
| O | 6.073  | 40.993 | 1.76   |
| H | 5.661  | 41.404 | 2.52   |
| H | 6.112  | 41.69  | 1.104  |
| O | -1.851 | 40.213 | 4.605  |
| H | -1.878 | 39.57  | 3.896  |
| H | -2.63  | 40.752 | 4.469  |
| O | 13.789 | 30.139 | 14.483 |
| H | 14.251 | 30.977 | 14.49  |
| H | 12.876 | 30.37  | 14.311 |
| O | 9.939  | 41.263 | 4.393  |
| H | 10.453 | 41.866 | 4.93   |
| H | 9.12   | 41.729 | 4.226  |
| O | 9.383  | 46.206 | 0.692  |
| H | 9.71   | 46.224 | 1.591  |
| H | 8.432  | 46.149 | 0.784  |
| O | 7.086  | 44.949 | 7.995  |
| H | 7.704  | 44.226 | 8.107  |
| H | 6.756  | 44.845 | 7.102  |
| O | -1.244 | 43.472 | 13.195 |
| H | -1.642 | 43.005 | 12.46  |
| H | -0.933 | 44.294 | 12.816 |
| O | -0.95  | 38.188 | 10.1   |
| H | -0.47  | 37.382 | 10.293 |
| H | -0.499 | 38.559 | 9.341  |
| O | 6.646  | 43.383 | 5.734  |
| H | 6.467  | 42.447 | 5.636  |
| H | 6.869  | 43.678 | 4.851  |
| O | 0.595  | 45.488 | 11.054 |
| H | -0.002 | 45.955 | 11.639 |
| H | 0.445  | 45.881 | 10.194 |
| O | 15.068 | 39.245 | 5.088  |
| H | 15.601 | 38.951 | 4.349  |
| H | 14.814 | 38.438 | 5.536  |



|   |        |        |        |
|---|--------|--------|--------|
| O | -0.285 | 26.239 | 3.715  |
| H | 0.67   | 26.181 | 3.684  |
| H | -0.536 | 25.658 | 4.433  |
| O | 6.603  | 39.057 | 8.322  |
| H | 6.827  | 38.134 | 8.201  |
| H | 6.171  | 39.308 | 7.505  |
| O | 10.096 | 37.783 | 4.638  |
| H | 9.38   | 37.614 | 4.025  |
| H | 9.907  | 38.651 | 4.994  |
| O | 10.034 | 45.584 | 6.582  |
| H | 9.845  | 44.808 | 7.109  |
| H | 9.339  | 45.603 | 5.924  |
| O | -0.049 | 35.423 | 10.892 |
| H | 0.25   | 34.559 | 10.609 |
| H | -0.97  | 35.454 | 10.634 |
| O | 4.959  | 35.508 | 12.792 |
| H | 5.476  | 36.293 | 12.974 |
| H | 4.192  | 35.589 | 13.359 |
| O | 2.144  | 54.449 | 13.681 |
| H | 1.361  | 53.904 | 13.605 |
| H | 2.82   | 53.854 | 14.006 |
| O | 10.588 | 48.253 | 7.339  |
| H | 10.293 | 47.392 | 7.043  |
| H | 10.675 | 48.163 | 8.288  |
| O | 17.274 | 39.13  | 3.43   |
| H | 18.032 | 39.384 | 3.955  |
| H | 17.636 | 38.575 | 2.739  |
| O | 15.19  | 34.07  | 6.025  |
| H | 14.842 | 33.959 | 5.14   |
| H | 15.827 | 33.362 | 6.122  |
| O | 11.782 | 39.157 | 8.74   |
| H | 12.487 | 39.804 | 8.696  |
| H | 11.387 | 39.291 | 9.601  |
| O | 7.232  | 31.477 | 16.744 |
| H | 6.443  | 32.005 | 16.628 |
| H | 7.948  | 32.056 | 16.483 |
| O | 12.106 | 35.796 | 4.072  |
| H | 11.366 | 36.397 | 4.16   |
| H | 12.713 | 36.248 | 3.486  |
| O | 13.423 | 30.076 | 2.629  |
| H | 12.822 | 29.623 | 2.038  |
| H | 13.439 | 30.978 | 2.31   |
| O | 7.502  | 36.77  | 2.035  |
| H | 6.591  | 36.486 | 1.954  |
| H | 7.992  | 36.164 | 1.48   |
| O | 2.535  | 26.316 | 3.88   |
| H | 2.423  | 26.244 | 4.828  |

|   |        |        |        |
|---|--------|--------|--------|
| H | 3.251  | 26.942 | 3.771  |
| O | 0.8    | 50.506 | 9.653  |
| H | 1.332  | 51.222 | 10     |
| H | 1.434  | 49.904 | 9.262  |
| O | 15.531 | 27.904 | 14.069 |
| H | 14.669 | 28.299 | 14.198 |
| H | 15.855 | 28.294 | 13.258 |
| O | 11.495 | 30.195 | 12.799 |
| H | 10.881 | 30.789 | 13.232 |
| H | 11.4   | 30.389 | 11.867 |
| O | 9.573  | 48.475 | 14.156 |
| H | 9.213  | 48.605 | 15.033 |
| H | 9.091  | 47.725 | 13.808 |
| O | 7.124  | 33.1   | 13.814 |
| H | 7.791  | 33.713 | 13.505 |
| H | 6.482  | 33.651 | 14.262 |
| O | 7.91   | 33.299 | 8.497  |
| H | 8.542  | 33.507 | 7.808  |
| H | 7.285  | 34.023 | 8.474  |
| O | 9.588  | 52.22  | 7.469  |
| H | 9.712  | 53.169 | 7.436  |
| H | 10.213 | 51.919 | 8.127  |
| O | 5.047  | 48.672 | 7.42   |
| H | 5.27   | 49.563 | 7.149  |
| H | 4.959  | 48.187 | 6.6    |
| O | 6.448  | 30.835 | 7.562  |
| H | 6.395  | 30.105 | 8.179  |
| H | 6.679  | 31.59  | 8.104  |
| O | 6.213  | 28.73  | 11.842 |
| H | 6.94   | 28.766 | 12.464 |
| H | 6.16   | 29.616 | 11.485 |
| O | 7.063  | 22.308 | 3.037  |
| H | 7.974  | 22.558 | 2.88   |
| H | 7.11   | 21.663 | 3.743  |
| O | 6.952  | 33.996 | 2.14   |
| H | 6.701  | 33.144 | 1.782  |
| H | 7.745  | 34.234 | 1.659  |
| O | 1.006  | 41.225 | 10.837 |
| H | 0.557  | 40.993 | 11.649 |
| H | 1.534  | 40.455 | 10.626 |
| O | 1.309  | 26.68  | 12.974 |
| H | 2.232  | 26.887 | 12.829 |
| H | 1.111  | 26.002 | 12.327 |
| O | 6.436  | 43.152 | 12.68  |
| H | 6.076  | 43.268 | 11.8   |
| H | 5.99   | 43.813 | 13.21  |
| O | 1.383  | 24.768 | 54.813 |

|   |        |        |        |
|---|--------|--------|--------|
| H | 1.724  | 25.474 | 54.264 |
| H | 0.476  | 24.66  | 54.528 |
| O | -1.615 | 18.78  | 56.578 |
| H | -1.995 | 17.928 | 56.362 |
| H | -0.985 | 18.947 | 55.876 |
| O | 12.582 | 23.277 | 62.164 |
| H | 12.354 | 23.017 | 63.057 |
| H | 13.267 | 22.661 | 61.904 |
| O | 0.096  | 24.062 | 51.456 |
| H | 0.838  | 23.779 | 50.921 |
| H | -0.371 | 24.689 | 50.904 |
| O | 2.873  | 26.473 | 53.104 |
| H | 3.288  | 27.333 | 53.049 |
| H | 2.128  | 26.528 | 52.507 |
| O | 0.739  | 16.806 | 50.452 |
| H | 1.642  | 17.024 | 50.219 |
| H | 0.635  | 17.137 | 51.344 |
| O | 8.022  | 14.262 | 49.734 |
| H | 8.574  | 14.871 | 49.243 |
| H | 8.641  | 13.673 | 50.165 |
| O | 0.189  | 20.194 | 54.869 |
| H | 0.315  | 19.818 | 53.998 |
| H | 0.877  | 20.855 | 54.946 |
| O | 8.691  | 22.981 | 52.727 |
| H | 8.154  | 22.226 | 52.486 |
| H | 9.421  | 22.963 | 52.107 |
| O | -2.466 | 16.342 | 55.887 |
| H | -2.974 | 15.531 | 55.869 |
| H | -2.217 | 16.489 | 54.975 |
| O | 5.601  | 17.84  | 57.781 |
| H | 6.204  | 17.241 | 58.221 |
| H | 5.872  | 17.821 | 56.864 |
| O | 4.39   | 13.532 | 55.369 |
| H | 4.662  | 12.619 | 55.274 |
| H | 3.434  | 13.504 | 55.321 |
| O | 4.739  | 32.807 | 57.078 |
| H | 5.161  | 31.958 | 56.95  |
| H | 4.091  | 32.861 | 56.375 |
| O | 16.453 | 28.294 | 54.066 |
| H | 17.213 | 28.407 | 54.638 |
| H | 16.71  | 27.598 | 53.461 |
| O | 10.353 | 21.198 | 49.03  |
| H | 10.721 | 20.882 | 48.205 |
| H | 10.038 | 20.408 | 49.47  |
| O | 10.432 | 12.847 | 49.169 |
| H | 10.711 | 12.821 | 48.254 |
| H | 10.972 | 12.186 | 49.603 |

|   |        |        |        |
|---|--------|--------|--------|
| O | 4.076  | 23.967 | 53.376 |
| H | 4.184  | 23.552 | 54.233 |
| H | 3.475  | 24.694 | 53.536 |
| O | -0.893 | 15.941 | 48.362 |
| H | -0.253 | 16.184 | 49.031 |
| H | -1.091 | 15.022 | 48.544 |
| O | 4.383  | 20.048 | 46.776 |
| H | 4.552  | 19.388 | 47.449 |
| H | 4.713  | 19.655 | 45.967 |
| O | 10.938 | 11.039 | 44.51  |
| H | 10.418 | 11.288 | 43.746 |
| H | 11.267 | 11.868 | 44.856 |
| O | 8.562  | 30.698 | 57.616 |
| H | 8.271  | 30.805 | 56.71  |
| H | 7.834  | 31.028 | 58.142 |
| O | 6.068  | 27.01  | 50.52  |
| H | 5.257  | 27.202 | 50.991 |
| H | 6.487  | 26.321 | 51.036 |
| O | 6.458  | 25.235 | 61.145 |
| H | 6.429  | 24.281 | 61.068 |
| H | 5.587  | 25.524 | 60.873 |
| O | -4.968 | 12.275 | 47.519 |
| H | -5.261 | 13.121 | 47.856 |
| H | -5.706 | 11.686 | 47.676 |
| O | 5.592  | 9.95   | 50.164 |
| H | 5.214  | 10.726 | 50.578 |
| H | 6.331  | 10.286 | 49.656 |
| O | 7.742  | 16.54  | 47.058 |
| H | 6.794  | 16.661 | 47.014 |
| H | 8.004  | 16.982 | 47.865 |
| O | 3.4    | 20.31  | 49.997 |
| H | 3.51   | 20.343 | 50.948 |
| H | 4.285  | 20.419 | 49.65  |
| O | 3.269  | 17.036 | 59.001 |
| H | 4.004  | 17.164 | 58.401 |
| H | 3.385  | 17.711 | 59.669 |
| O | -0.919 | 21.394 | 57.434 |
| H | -0.975 | 20.835 | 56.66  |
| H | -0.181 | 21.042 | 57.932 |
| O | -2.624 | 14.22  | 50.842 |
| H | -2.166 | 13.379 | 50.825 |
| H | -2.31  | 14.647 | 51.639 |
| O | 7.436  | 15.22  | 54.174 |
| H | 7.678  | 14.324 | 54.41  |
| H | 7.909  | 15.769 | 54.799 |
| O | 10.024 | 17.155 | 59.497 |
| H | 10.044 | 18.02  | 59.906 |

|   |        |        |        |
|---|--------|--------|--------|
| H | 10.775 | 16.696 | 59.872 |
| O | 2.555  | 14.748 | 52.047 |
| H | 2.556  | 15.556 | 51.534 |
| H | 3.45   | 14.672 | 52.377 |
| O | 11.211 | 17.886 | 43.895 |
| H | 10.892 | 17.241 | 44.525 |
| H | 12.145 | 17.696 | 43.81  |
| O | 3.467  | 17.332 | 50.425 |
| H | 4.229  | 16.938 | 50     |
| H | 3.585  | 18.274 | 50.304 |
| O | 6.959  | 23.325 | 55.834 |
| H | 7.848  | 23.307 | 55.48  |
| H | 6.985  | 24     | 56.512 |
| O | 8.144  | 28.088 | 47.994 |
| H | 8.116  | 28.432 | 48.887 |
| H | 8.687  | 27.302 | 48.056 |
| O | 12.231 | 22.3   | 55.946 |
| H | 11.924 | 21.535 | 56.433 |
| H | 13.184 | 22.212 | 55.938 |
| O | 3.374  | 24.64  | 57.847 |
| H | 3.879  | 25.299 | 57.371 |
| H | 3.661  | 23.805 | 57.477 |
| O | 0.657  | 27.294 | 47.315 |
| H | 0.789  | 26.532 | 47.878 |
| H | 1.194  | 27.981 | 47.711 |
| O | 8.455  | 27.877 | 58.285 |
| H | 8.53   | 27.158 | 58.911 |
| H | 8.467  | 28.668 | 58.824 |
| O | 3.622  | 20.896 | 52.587 |
| H | 3.137  | 20.94  | 53.412 |
| H | 3.74   | 21.81  | 52.33  |
| O | 11.872 | 27.827 | 46.964 |
| H | 11.859 | 27.856 | 47.92  |
| H | 11.456 | 28.646 | 46.694 |
| O | 5.635  | 13.732 | 50.662 |
| H | 6.539  | 13.674 | 50.355 |
| H | 5.286  | 14.515 | 50.236 |
| O | 3.362  | 28.01  | 50.532 |
| H | 3.583  | 27.914 | 49.606 |
| H | 2.503  | 28.431 | 50.531 |
| O | 6.436  | 17.753 | 52.407 |
| H | 6.705  | 17.093 | 53.046 |
| H | 5.505  | 17.583 | 52.265 |
| O | 6.667  | 3.937  | 58.547 |
| H | 7.266  | 3.821  | 59.284 |
| H | 6.704  | 4.873  | 58.353 |
| O | 1.919  | 29.94  | 54.303 |

|   |         |        |        |
|---|---------|--------|--------|
| H | 2.368   | 30.505 | 54.932 |
| H | 1.265   | 29.473 | 54.824 |
| O | 6.316   | 13.223 | 58.202 |
| H | 6.185   | 12.377 | 57.774 |
| H | 5.842   | 13.846 | 57.652 |
| O | 5.913   | 27.617 | 57.559 |
| H | 6.855   | 27.539 | 57.71  |
| H | 5.73    | 26.988 | 56.861 |
| O | -0.74   | 29.281 | 54.795 |
| H | -0.913  | 28.446 | 55.228 |
| H | -1.203  | 29.218 | 53.959 |
| O | 4.333   | 26.752 | 48.033 |
| H | 5.124   | 26.724 | 48.572 |
| H | 3.796   | 26.03  | 48.36  |
| O | 1.442   | 29.955 | 48.363 |
| H | 1.372   | 30.534 | 49.122 |
| H | 0.562   | 29.946 | 47.987 |
| O | -8.384  | 21.212 | 52.306 |
| H | -8.146  | 20.307 | 52.508 |
| H | -7.743  | 21.489 | 51.651 |
| O | -5.82   | 22.685 | 51.967 |
| H | -5.43   | 21.917 | 52.386 |
| H | -5.485  | 22.664 | 51.07  |
| O | -10.517 | 21.674 | 42.909 |
| H | -10.716 | 22.138 | 42.096 |
| H | -11.145 | 20.952 | 42.933 |
| O | 10.977  | 7.474  | 53.969 |
| H | 11.362  | 7.508  | 53.093 |
| H | 10.034  | 7.424  | 53.815 |
| O | 0.902   | 12.689 | 50.668 |
| H | 1.303   | 12.614 | 49.802 |
| H | 1.56    | 13.139 | 51.199 |
| O | 3.638   | 31.681 | 50.57  |
| H | 4.254   | 32.412 | 50.524 |
| H | 2.775   | 32.094 | 50.539 |
| O | 20.173  | 27.971 | 47.905 |
| H | 20.179  | 28.543 | 48.673 |
| H | 19.912  | 27.115 | 48.246 |
| O | 14.126  | 26.765 | 56.815 |
| H | 13.187  | 26.643 | 56.674 |
| H | 14.183  | 27.266 | 57.628 |
| O | 2.316   | 22.961 | 49.973 |
| H | 2.514   | 22.056 | 49.732 |
| H | 3.17    | 23.351 | 50.159 |
| O | 9.626   | 26.209 | 49.494 |
| H | 9.783   | 26.247 | 50.437 |
| H | 10.38   | 25.732 | 49.145 |

|   |        |        |        |
|---|--------|--------|--------|
| O | 4.746  | 11.779 | 52.037 |
| H | 5.177  | 11.727 | 52.89  |
| H | 5.118  | 12.56  | 51.628 |
| O | 9.243  | 26.768 | 55.96  |
| H | 8.482  | 26.464 | 55.466 |
| H | 8.876  | 27.135 | 56.764 |
| O | 3.613  | 9.978  | 59.837 |
| H | 4.102  | 9.387  | 60.41  |
| H | 3.792  | 10.851 | 60.185 |
| O | 9.537  | 10.305 | 51.479 |
| H | 9.109  | 11.161 | 51.48  |
| H | 10.406 | 10.473 | 51.114 |
| O | 11.199 | 10.314 | 61.305 |
| H | 11.546 | 10.866 | 60.604 |
| H | 11.233 | 9.426  | 60.95  |
| O | 14.445 | 10.016 | 47.982 |
| H | 13.825 | 9.668  | 47.342 |
| H | 14.027 | 10.812 | 48.312 |
| O | 16.04  | 9.207  | 39.762 |
| H | 16.717 | 8.542  | 39.64  |
| H | 15.78  | 9.119  | 40.68  |
| O | 6.645  | 25.074 | 52.425 |
| H | 5.795  | 24.7   | 52.655 |
| H | 7.196  | 24.315 | 52.233 |
| O | 9.733  | 33.366 | 65.486 |
| H | 10.651 | 33.124 | 65.607 |
| H | 9.656  | 33.552 | 64.55  |
| O | 6.155  | 24.504 | 63.88  |
| H | 6.464  | 23.825 | 63.28  |
| H | 6.365  | 25.327 | 63.44  |
| O | 5.284  | 16.112 | 55.548 |
| H | 5.917  | 15.842 | 54.883 |
| H | 4.826  | 15.306 | 55.784 |
| O | 13.341 | 14.914 | 52.076 |
| H | 13.05  | 15.655 | 51.545 |
| H | 14.207 | 14.697 | 51.73  |
| O | 8.594  | 12.574 | 55.06  |
| H | 9.354  | 12.045 | 54.819 |
| H | 8.51   | 12.457 | 56.006 |
| O | 3.651  | 17.533 | 53.414 |
| H | 4.1    | 17.404 | 54.249 |
| H | 3.328  | 18.433 | 53.452 |
| O | 8.901  | 16.575 | 51.697 |
| H | 8.059  | 16.96  | 51.939 |
| H | 8.679  | 15.707 | 51.36  |
| O | 8.183  | 14.995 | 44.618 |
| H | 8.128  | 15.202 | 45.551 |

|   |        |        |        |
|---|--------|--------|--------|
| H | 8.061  | 14.047 | 44.576 |
| O | 11.851 | 29.007 | 49.377 |
| H | 12.569 | 28.827 | 49.984 |
| H | 11.41  | 29.772 | 49.747 |
| O | 8.251  | 22.575 | 37.336 |
| H | 9.096  | 22.191 | 37.568 |
| H | 7.977  | 22.097 | 36.553 |
| O | 4.883  | 15.565 | 48.995 |
| H | 5.249  | 15.948 | 48.197 |
| H | 4.138  | 15.047 | 48.692 |
| O | 10.67  | 25.545 | 33.194 |
| H | 10.567 | 24.731 | 32.701 |
| H | 9.998  | 25.499 | 33.874 |
| O | 12.602 | 33.114 | 41.681 |
| H | 13.42  | 32.658 | 41.876 |
| H | 12.475 | 32.987 | 40.741 |
| O | 1.572  | 22.49  | 42.709 |
| H | 1.07   | 21.684 | 42.585 |
| H | 2.354  | 22.37  | 42.169 |
| O | 4.966  | 24.988 | 39.231 |
| H | 5.239  | 24.676 | 38.368 |
| H | 4.723  | 24.194 | 39.707 |
| O | 5.789  | 20.559 | 33.127 |
| H | 6.539  | 20.097 | 32.751 |
| H | 5.03   | 20.041 | 32.858 |
| O | 18.009 | 23.765 | 44.664 |
| H | 17.432 | 24.401 | 44.241 |
| H | 18.246 | 23.155 | 43.966 |
| O | 14.089 | 23.76  | 34.57  |
| H | 14.997 | 23.58  | 34.328 |
| H | 14.141 | 24.091 | 35.467 |
| O | 2.711  | 15.478 | 35.15  |
| H | 2.34   | 14.99  | 35.885 |
| H | 3.522  | 15.016 | 34.94  |
| O | 15.651 | 29.597 | 34.535 |
| H | 15.05  | 30.342 | 34.517 |
| H | 16.382 | 29.865 | 33.978 |
| O | 8.515  | 15.152 | 41.966 |
| H | 8.958  | 15.961 | 41.711 |
| H | 8.418  | 15.22  | 42.915 |
| O | 2.403  | 22.033 | 38.586 |
| H | 1.838  | 22.693 | 38.988 |
| H | 1.822  | 21.543 | 38.003 |
| O | 11.268 | 27.034 | 36.744 |
| H | 10.717 | 26.252 | 36.743 |
| H | 11.763 | 26.98  | 35.927 |
| O | 8.774  | 26.242 | 39.508 |



|   |        |        |        |
|---|--------|--------|--------|
| H | 9.62   | 26.486 | 39.133 |
| H | 8.788  | 25.285 | 39.53  |
| O | 3.976  | 19.466 | 41.891 |
| H | 3.502  | 19.003 | 41.2   |
| H | 3.855  | 20.393 | 41.685 |
| O | 10.368 | 19.388 | 36.815 |
| H | 11.228 | 18.968 | 36.844 |
| H | 10.428 | 20.1   | 37.453 |
| O | 15.111 | 12.019 | 30.381 |
| H | 14.585 | 11.249 | 30.165 |
| H | 15.607 | 11.76  | 31.157 |
| O | 7.848  | 22.68  | 41.605 |
| H | 7.092  | 22.933 | 41.075 |
| H | 8.071  | 21.8   | 41.302 |
| O | 6.814  | 27.141 | 36.355 |
| H | 6.114  | 26.502 | 36.484 |
| H | 6.583  | 27.871 | 36.93  |
| O | 3.485  | 26.929 | 37.904 |
| H | 3.554  | 26.107 | 38.39  |
| H | 4.261  | 27.426 | 38.162 |
| O | 10.285 | 28.822 | 44.23  |
| H | 10.423 | 29.266 | 45.066 |
| H | 9.369  | 28.545 | 44.254 |
| O | 3.096  | 18.593 | 35.132 |
| H | 3.81   | 18.304 | 35.7   |
| H | 3.485  | 18.632 | 34.258 |
| O | -5.652 | 29.965 | 37.314 |
| H | -5.436 | 29.902 | 36.384 |
| H | -5.007 | 29.408 | 37.749 |
| O | 5.752  | 13.381 | 28.4   |
| H | 5.177  | 12.618 | 28.462 |
| H | 6.448  | 13.209 | 29.034 |
| O | 8.587  | 25.631 | 43.581 |
| H | 8.914  | 25.717 | 42.685 |
| H | 7.889  | 24.98  | 43.52  |
| O | 7.418  | 25.195 | 47.928 |
| H | 7.866  | 25.632 | 47.203 |
| H | 7.701  | 25.673 | 48.707 |
| O | 5.544  | 28.346 | 38.755 |
| H | 6.247  | 28.363 | 39.406 |
| H | 5.222  | 29.247 | 38.729 |
| O | 6.929  | 24.783 | 32.094 |
| H | 6.566  | 24.259 | 31.38  |
| H | 7.507  | 24.181 | 32.563 |
| O | 3.431  | 33.747 | 30.625 |
| H | 3.302  | 33.068 | 29.963 |
| H | 4.316  | 33.593 | 30.957 |

|   |        |        |        |
|---|--------|--------|--------|
| O | 10.364 | 23.484 | 40.968 |
| H | 10.841 | 23.502 | 41.798 |
| H | 9.448  | 23.371 | 41.221 |
| O | 12.567 | 21.134 | 43.542 |
| H | 13.33  | 21.703 | 43.437 |
| H | 12.851 | 20.287 | 43.197 |
| O | 3.028  | 24.868 | 42.138 |
| H | 2.684  | 24.098 | 42.591 |
| H | 3.717  | 25.198 | 42.715 |
| O | 5.572  | 22.085 | 44.478 |
| H | 6.487  | 21.821 | 44.582 |
| H | 5.115  | 21.279 | 44.24  |
| O | 10.826 | 30.872 | 51.614 |
| H | 11.488 | 31.006 | 52.293 |
| H | 10.408 | 30.043 | 51.848 |
| O | 5.395  | 17.676 | 28.449 |
| H | 5.193  | 18.107 | 27.618 |
| H | 5.343  | 16.741 | 28.252 |
| O | 5.106  | 16.942 | 46.396 |
| H | 4.986  | 16.12  | 45.92  |
| H | 5.164  | 17.608 | 45.712 |
| O | 7.678  | 13.583 | 30.822 |
| H | 7.952  | 14.429 | 30.468 |
| H | 7.991  | 13.59  | 31.727 |
| O | 0.239  | 15.922 | 55.764 |
| H | -0.676 | 15.895 | 56.043 |
| H | 0.736  | 15.99  | 56.579 |
| O | 0.906  | 21.899 | 35.111 |
| H | 0.968  | 21.017 | 35.478 |
| H | 0.366  | 22.381 | 35.738 |
| O | -1.384 | 18.844 | 49.327 |
| H | -1.355 | 17.888 | 49.348 |
| H | -2.269 | 19.063 | 49.619 |
| O | 5.286  | 19.232 | 44.221 |
| H | 4.526  | 19.286 | 43.641 |
| H | 6.026  | 19.082 | 43.632 |
| O | -0.224 | 10.815 | 45.846 |
| H | -0.149 | 10.762 | 44.894 |
| H | -1.016 | 11.331 | 45.996 |
| O | 12.942 | 18.256 | 36.583 |
| H | 13.616 | 18.933 | 36.522 |
| H | 13.122 | 17.814 | 37.412 |
| O | 2.012  | 24.103 | 33.918 |
| H | 2.724  | 23.758 | 33.38  |
| H | 1.647  | 23.333 | 34.354 |
| O | 10.155 | 8.319  | 44.852 |
| H | 9.996  | 9.262  | 44.869 |

|   |        |        |        |
|---|--------|--------|--------|
| H | 9.368  | 7.936  | 45.24  |
| O | -3.028 | 20.551 | 45.421 |
| H | -2.665 | 20.175 | 44.619 |
| H | -2.974 | 19.844 | 46.064 |
| O | 10.547 | 20.324 | 34.1   |
| H | 9.689  | 20.638 | 33.813 |
| H | 10.444 | 20.175 | 35.04  |
| O | 8.847  | 16.247 | 30.094 |
| H | 8.33   | 17.045 | 29.981 |
| H | 9.419  | 16.436 | 30.837 |
| O | 2.143  | 18.21  | 40.177 |
| H | 1.625  | 17.458 | 40.464 |
| H | 2.318  | 18.042 | 39.251 |
| O | 12.911 | 13.645 | 28.764 |
| H | 13.41  | 13.172 | 29.431 |
| H | 12.203 | 13.046 | 28.526 |
| O | 1.388  | 29.218 | 26.158 |
| H | 2.242  | 29.156 | 26.586 |
| H | 1.343  | 30.121 | 25.843 |
| O | 5.226  | 23.705 | 49.082 |
| H | 5.456  | 22.867 | 48.681 |
| H | 5.877  | 24.32  | 48.742 |
| O | 4.508  | 18.126 | 32.569 |
| H | 3.72   | 17.66  | 32.291 |
| H | 5.181  | 17.446 | 32.625 |
| O | 10.483 | 21.533 | 38.771 |
| H | 9.674  | 21.176 | 39.138 |
| H | 10.697 | 22.273 | 39.339 |
| O | 18.141 | 29.012 | 37.401 |
| H | 18.261 | 29.936 | 37.183 |
| H | 19.025 | 28.646 | 37.392 |
| O | 8.999  | 23.272 | 32.874 |
| H | 8.858  | 22.464 | 32.382 |
| H | 8.912  | 23.012 | 33.791 |
| O | 4.178  | 28.6   | 42.745 |
| H | 3.426  | 28.167 | 43.151 |
| H | 4.561  | 27.931 | 42.177 |
| O | 4.258  | 26.268 | 44.909 |
| H | 4.308  | 27.06  | 45.445 |
| H | 3.682  | 25.683 | 45.4   |
| O | -3.415 | 25.597 | 44.884 |
| H | -3.503 | 25.457 | 45.826 |
| H | -2.473 | 25.695 | 44.743 |
| O | 8.12   | 19.942 | 40.403 |
| H | 7.689  | 19.505 | 41.138 |
| H | 7.605  | 19.687 | 39.637 |
| O | 3.12   | 27.105 | 31.779 |

|   |        |        |        |
|---|--------|--------|--------|
| H | 2.981  | 27.911 | 31.283 |
| H | 2.263  | 26.905 | 32.157 |
| O | 12.359 | 26.833 | 43.96  |
| H | 12.695 | 26.98  | 44.844 |
| H | 11.587 | 27.395 | 43.9   |
| O | 12.414 | 28.814 | 38.417 |
| H | 12.085 | 28.217 | 37.746 |
| H | 13.085 | 29.331 | 37.971 |
| O | 7.751  | 28.563 | 40.467 |
| H | 7.222  | 28.48  | 41.26  |
| H | 8.131  | 27.693 | 40.342 |
| O | 6.467  | 18.686 | 38.989 |
| H | 6.434  | 18.712 | 38.033 |
| H | 5.81   | 18.035 | 39.234 |
| O | 13.446 | 3.652  | 30.307 |
| H | 14.284 | 3.567  | 29.851 |
| H | 13.676 | 4.001  | 31.168 |
| O | 5.941  | 23.18  | 30.027 |
| H | 6.507  | 22.968 | 29.284 |
| H | 5.441  | 23.943 | 29.738 |
| O | 7.696  | 21.017 | 34.941 |
| H | 6.957  | 21.136 | 34.346 |
| H | 7.548  | 20.159 | 35.339 |
| O | -2.981 | 18.533 | 38.85  |
| H | -2.393 | 19.136 | 39.305 |
| H | -3.095 | 17.804 | 39.46  |
| O | 0.5    | 16.729 | 33.466 |
| H | 0.431  | 15.86  | 33.071 |
| H | 1.323  | 16.707 | 33.953 |
| O | -3.13  | 26.441 | 35.677 |
| H | -3.569 | 26.01  | 34.944 |
| H | -3.206 | 25.819 | 36.401 |
| O | 13.062 | 16.685 | 49.754 |
| H | 13.18  | 17.407 | 50.371 |
| H | 13.838 | 16.717 | 49.196 |
| O | 16.335 | 22.658 | 32.155 |
| H | 15.628 | 22.666 | 31.51  |
| H | 15.971 | 22.184 | 32.903 |
| O | 9.264  | 29.416 | 35.301 |
| H | 10.175 | 29.461 | 35.01  |
| H | 9.29   | 29.702 | 36.214 |
| O | -6.415 | 28.965 | 29.854 |
| H | -6.063 | 28.406 | 30.547 |
| H | -6.309 | 28.45  | 29.054 |
| O | 11.733 | 18.828 | 47.271 |
| H | 11.792 | 19.71  | 46.903 |
| H | 11.817 | 18.247 | 46.515 |

|   |         |        |        |
|---|---------|--------|--------|
| O | 10.144  | 32.889 | 50.118 |
| H | 10.505  | 32.189 | 50.661 |
| H | 9.633   | 32.434 | 49.449 |
| O | 6.2     | 35.324 | 33.732 |
| H | 7.052   | 34.889 | 33.766 |
| H | 6.39    | 36.239 | 33.937 |
| O | -3.828  | 28.374 | 29.257 |
| H | -4.21   | 29.2   | 28.963 |
| H | -3.402  | 28.589 | 30.087 |
| O | -0.601  | 23.324 | 36.993 |
| H | -1.416  | 23.492 | 37.466 |
| H | -0.118  | 24.148 | 37.047 |
| O | 2.852   | 18.139 | 29.509 |
| H | 3.749   | 18.251 | 29.193 |
| H | 2.943   | 17.621 | 30.309 |
| O | 7.436   | 28.256 | 43.954 |
| H | 7.423   | 27.303 | 44.042 |
| H | 6.573   | 28.537 | 44.257 |
| O | -4.549  | 23.444 | 22.965 |
| H | -4.091  | 24.267 | 23.132 |
| H | -3.958  | 22.769 | 23.3   |
| O | -0.911  | 21.294 | 33.198 |
| H | -0.238  | 21.454 | 33.86  |
| H | -0.882  | 20.348 | 33.052 |
| O | 6.322   | 19.412 | 50.157 |
| H | 7.114   | 19.272 | 49.638 |
| H | 6.421   | 18.826 | 50.907 |
| O | 11.989  | 24.808 | 49.236 |
| H | 12.794  | 25.262 | 49.483 |
| H | 12.012  | 24.784 | 48.279 |
| O | -11.454 | 16.014 | 43.553 |
| H | -10.826 | 16.728 | 43.663 |
| H | -12.292 | 16.389 | 43.824 |
| O | 0.185   | 27.762 | 42.094 |
| H | 0.05    | 28.353 | 41.353 |
| H | -0.458  | 28.041 | 42.745 |
| O | 6.038   | 24.537 | 43.2   |
| H | 5.635   | 25.089 | 43.87  |
| H | 5.654   | 23.671 | 43.341 |
| O | 4.977   | 13.999 | 45.144 |
| H | 4.845   | 13.852 | 46.081 |
| H | 5.902   | 13.799 | 44.998 |
| O | 0.546   | 20.199 | 41.128 |
| H | 1.272   | 19.619 | 40.899 |
| H | 0.223   | 20.523 | 40.287 |
| O | 9.455   | 18.388 | 49.621 |
| H | 10.234  | 18.234 | 49.088 |

|   |        |        |        |
|---|--------|--------|--------|
| H | 9.529  | 17.761 | 50.34  |
| O | 7.948  | 11.77  | 27.288 |
| H | 8.073  | 10.824 | 27.363 |
| H | 7.625  | 11.898 | 26.396 |
| O | 4.916  | 32.661 | 41.593 |
| H | 4.958  | 32.788 | 40.645 |
| H | 4.132  | 32.129 | 41.729 |
| O | 8.185  | 19.995 | 31.979 |
| H | 7.988  | 19.33  | 31.319 |
| H | 8.245  | 20.813 | 31.485 |
| O | 5.949  | 29.12  | 29.217 |
| H | 6.252  | 28.545 | 28.514 |
| H | 6.548  | 28.945 | 29.943 |
| O | 14.365 | 27.028 | 42.251 |
| H | 13.732 | 26.755 | 42.915 |
| H | 14.108 | 27.923 | 42.03  |
| O | 9.192  | 22.114 | 30.318 |
| H | 9.675  | 21.652 | 29.632 |
| H | 9.455  | 23.029 | 30.22  |
| O | 11.399 | 13.801 | 44.598 |
| H | 11.898 | 14.111 | 43.842 |
| H | 10.67  | 14.415 | 44.672 |
| O | 14.731 | 26.085 | 39.684 |
| H | 13.886 | 25.727 | 39.954 |
| H | 15.051 | 26.553 | 40.455 |
| O | 9.924  | 22.808 | 43.991 |
| H | 9.673  | 23.731 | 44.025 |
| H | 10.85  | 22.821 | 43.746 |
| O | 5.161  | 24.71  | 36.171 |
| H | 5.575  | 23.914 | 35.836 |
| H | 4.627  | 25.027 | 35.442 |
| O | 6.234  | 7.117  | 20.623 |
| H | 6.939  | 6.616  | 20.212 |
| H | 5.808  | 7.572  | 19.896 |
| O | 15.932 | 18.896 | 31.028 |
| H | 16.873 | 19.028 | 31.14  |
| H | 15.599 | 18.775 | 31.917 |
| O | 17.471 | 23.108 | 47.218 |
| H | 17.418 | 23.188 | 46.266 |
| H | 16.58  | 22.886 | 47.489 |
| O | 13.566 | 16.411 | 46.592 |
| H | 13.774 | 17.336 | 46.722 |
| H | 13.484 | 16.315 | 45.643 |
| O | 6.299  | 22.426 | 39.532 |
| H | 5.832  | 21.781 | 39.001 |
| H | 6.949  | 22.8   | 38.937 |
| O | 8.22   | 20.896 | 45.165 |

|   |        |        |        |
|---|--------|--------|--------|
| H | 8.959  | 21.457 | 44.931 |
| H | 7.883  | 21.272 | 45.979 |
| O | 8.548  | 15.803 | 38.259 |
| H | 7.969  | 16.047 | 38.981 |
| H | 9.376  | 16.241 | 38.457 |
| O | 11.064 | 16.862 | 39.093 |
| H | 10.97  | 17.303 | 39.937 |
| H | 11.995 | 16.645 | 39.038 |
| O | 11.583 | 13.371 | 35.796 |
| H | 10.669 | 13.141 | 35.963 |
| H | 11.567 | 14.314 | 35.633 |
| O | 9.373  | 15.381 | 25.387 |
| H | 8.843  | 15.836 | 26.041 |
| H | 9.625  | 16.064 | 24.766 |
| O | 17.259 | 16.849 | 34.223 |
| H | 18.104 | 16.469 | 33.982 |
| H | 16.627 | 16.406 | 33.656 |
| O | 11.76  | 34.68  | 35.206 |
| H | 12.109 | 35.011 | 36.033 |
| H | 12.073 | 35.301 | 34.548 |
| O | -4.702 | 30.657 | 49.746 |
| H | -3.932 | 31.134 | 50.056 |
| H | -4.781 | 30.903 | 48.824 |
| O | -0.992 | 13.108 | 56.118 |
| H | -0.84  | 13.54  | 56.959 |
| H | -0.142 | 13.137 | 55.678 |
| O | 3.717  | 14.22  | 42.363 |
| H | 2.937  | 14.762 | 42.248 |
| H | 3.755  | 14.05  | 43.304 |
| O | 14.283 | 31.515 | 50.292 |
| H | 14.171 | 31.382 | 49.35  |
| H | 15.146 | 31.922 | 50.375 |
| O | 10.835 | 15.409 | 48.691 |
| H | 11.613 | 15.786 | 49.102 |
| H | 10.88  | 14.477 | 48.903 |
| O | 3.191  | 11.442 | 45.273 |
| H | 3.492  | 11.137 | 44.417 |
| H | 3.689  | 12.244 | 45.431 |
| O | 9.138  | 29.766 | 38.094 |
| H | 8.417  | 29.602 | 38.701 |
| H | 9.801  | 29.116 | 38.328 |
| O | 8.958  | 25.83  | 35.596 |
| H | 8.255  | 26.456 | 35.771 |
| H | 8.699  | 25.041 | 36.073 |
| O | 5.939  | 12.102 | 41.256 |
| H | 5.315  | 12.829 | 41.27  |
| H | 6.038  | 11.889 | 40.328 |

|   |        |        |        |
|---|--------|--------|--------|
| O | 8.625  | 11.495 | 42.471 |
| H | 8.809  | 12.051 | 41.714 |
| H | 7.676  | 11.55  | 42.584 |
| O | 5.156  | 15.74  | 38.162 |
| H | 5.509  | 15.493 | 39.017 |
| H | 4.69   | 14.959 | 37.861 |
| O | 2.988  | 13.273 | 37.244 |
| H | 2.296  | 12.964 | 36.66  |
| H | 2.692  | 13.024 | 38.119 |
| O | 1.588  | 24.518 | 39.68  |
| H | 2.181  | 24.54  | 40.431 |
| H | 0.719  | 24.654 | 40.057 |
| O | 15.205 | 15.661 | 40.949 |
| H | 15.517 | 14.757 | 40.945 |
| H | 15.926 | 16.162 | 41.33  |
| O | 9.959  | 30.638 | 41.243 |
| H | 9.321  | 30.079 | 40.799 |
| H | 9.564  | 30.822 | 42.095 |
| O | 3.508  | 30.8   | 33.129 |
| H | 3.222  | 30.664 | 32.225 |
| H | 2.813  | 30.412 | 33.661 |
| O | 11.922 | 12.574 | 47.069 |
| H | 12.471 | 13.188 | 47.557 |
| H | 12.081 | 12.79  | 46.15  |
| O | 3.27   | 32.073 | 47.337 |
| H | 2.865  | 31.297 | 47.724 |
| H | 3.405  | 31.84  | 46.419 |
| O | -0.469 | 18.354 | 21.088 |
| H | -1.29  | 18.671 | 20.712 |
| H | 0.208  | 18.688 | 20.5   |
| O | 5.93   | 16.051 | 24.963 |
| H | 6.269  | 15.191 | 25.21  |
| H | 6.089  | 16.601 | 25.731 |
| O | 7.735  | 30.473 | 21.362 |
| H | 8.299  | 29.754 | 21.076 |
| H | 8.322  | 31.064 | 21.835 |
| O | 2.26   | 26.497 | 17.703 |
| H | 1.741  | 27.16  | 17.248 |
| H | 2.98   | 26.986 | 18.099 |
| O | 3.294  | 19.924 | 20.555 |
| H | 4.025  | 20.508 | 20.757 |
| H | 3.263  | 19.315 | 21.292 |
| O | -0.514 | 13.455 | 23.69  |
| H | -0.292 | 14.208 | 24.237 |
| H | 0.108  | 13.494 | 22.963 |
| O | 7.338  | 14.893 | 17.795 |
| H | 7.989  | 14.343 | 18.23  |



|   |        |        |        |
|---|--------|--------|--------|
| H | 7.778  | 15.205 | 17.004 |
| O | 11.568 | 19.174 | 30.713 |
| H | 12.297 | 19.09  | 30.098 |
| H | 10.954 | 19.764 | 30.277 |
| O | 12.658 | 24.923 | 16.257 |
| H | 13.333 | 25.444 | 16.692 |
| H | 11.838 | 25.373 | 16.462 |
| O | 12.101 | 20.686 | 23.013 |
| H | 11.819 | 20.185 | 23.779 |
| H | 12.903 | 21.124 | 23.296 |
| O | 12.591 | 19.997 | 26.601 |
| H | 13.354 | 19.45  | 26.787 |
| H | 11.996 | 19.423 | 26.119 |
| O | -1.75  | 15.837 | 12.523 |
| H | -2.386 | 15.142 | 12.689 |
| H | -1.028 | 15.65  | 13.124 |
| O | -0.196 | 20.361 | 16.378 |
| H | 0.715  | 20.649 | 16.317 |
| H | -0.369 | 19.933 | 15.54  |
| O | 10.626 | 24.552 | 29.372 |
| H | 10.796 | 25.49  | 29.281 |
| H | 10.178 | 24.31  | 28.562 |
| O | 11.77  | 26.925 | 7.03   |
| H | 12.493 | 27.405 | 7.435  |
| H | 12.097 | 26.69  | 6.161  |
| O | 7.539  | 18.78  | 29.72  |
| H | 6.66   | 18.501 | 29.464 |
| H | 8.004  | 18.896 | 28.892 |
| O | 3.787  | 27.718 | 14.293 |
| H | 3.17   | 27.942 | 14.99  |
| H | 4.5    | 27.262 | 14.741 |
| O | 0.044  | 9.472  | 10.459 |
| H | 0.915  | 9.317  | 10.824 |
| H | 0.154  | 10.235 | 9.892  |
| O | 9.651  | 14.237 | 21.773 |
| H | 8.718  | 14.314 | 21.971 |
| H | 10.003 | 13.699 | 22.481 |
| O | 4.311  | 15.636 | 14.034 |
| H | 4.608  | 14.726 | 14.035 |
| H | 3.374  | 15.583 | 14.221 |
| O | -2.013 | 20.162 | 19.517 |
| H | -2.518 | 20.75  | 20.08  |
| H | -1.104 | 20.436 | 19.64  |
| O | 11.544 | 25.839 | 20.365 |
| H | 11.341 | 24.953 | 20.663 |
| H | 12.362 | 25.747 | 19.877 |
| O | 5.779  | 19.188 | 16.581 |

|   |        |        |        |
|---|--------|--------|--------|
| H | 6.193  | 18.689 | 15.877 |
| H | 5.298  | 19.882 | 16.132 |
| O | 3.614  | 21.789 | 12.04  |
| H | 2.779  | 22.199 | 12.264 |
| H | 4.257  | 22.493 | 12.123 |
| O | 10.588 | 9.924  | 8.364  |
| H | 10.592 | 10.865 | 8.188  |
| H | 9.761  | 9.614  | 7.996  |
| O | 13.507 | 24.591 | 31.374 |
| H | 13.063 | 23.785 | 31.637 |
| H | 12.957 | 25.292 | 31.723 |
| O | 14.145 | 22.337 | 23.924 |
| H | 14.818 | 21.659 | 23.988 |
| H | 14.339 | 22.936 | 24.645 |
| O | 12.306 | 27.055 | 25.68  |
| H | 12.641 | 26.552 | 24.937 |
| H | 13.052 | 27.126 | 26.276 |
| O | 9.097  | 23.452 | 23.009 |
| H | 9.739  | 23.321 | 22.311 |
| H | 9.624  | 23.582 | 23.798 |
| O | 1.935  | 31.489 | 15.432 |
| H | 2.642  | 31.239 | 14.837 |
| H | 2.008  | 32.441 | 15.503 |
| O | 8.435  | 29.233 | 24.895 |
| H | 8.239  | 28.576 | 25.562 |
| H | 8.547  | 30.047 | 25.386 |
| O | 11.477 | 17.161 | 26.853 |
| H | 12.365 | 16.829 | 26.723 |
| H | 11.263 | 16.926 | 27.756 |
| O | -0.113 | 16.137 | 22.658 |
| H | -0.143 | 16.929 | 22.122 |
| H | -1.006 | 16.036 | 22.987 |
| O | 7.37   | 23.363 | 20.456 |
| H | 7.574  | 22.456 | 20.23  |
| H | 8.066  | 23.622 | 21.06  |
| O | 5.357  | 16.061 | 21.117 |
| H | 4.925  | 15.224 | 20.945 |
| H | 4.674  | 16.608 | 21.504 |
| O | 3.636  | 15.776 | 17.407 |
| H | 3.559  | 16.639 | 17.815 |
| H | 4.549  | 15.726 | 17.123 |
| O | -4.208 | 11.535 | 16.351 |
| H | -4.588 | 12.199 | 16.926 |
| H | -3.435 | 11.223 | 16.823 |
| O | 3.924  | 26.871 | 21.782 |
| H | 4.482  | 26.505 | 21.095 |
| H | 3.608  | 27.698 | 21.419 |

|   |        |        |        |
|---|--------|--------|--------|
| O | 2.592  | 20.087 | 27.694 |
| H | 2.866  | 20.878 | 28.158 |
| H | 2.403  | 19.456 | 28.389 |
| O | 8.751  | 18.015 | 21.708 |
| H | 9.344  | 18.762 | 21.635 |
| H | 8.657  | 17.694 | 20.811 |
| O | -0.229 | 22.277 | 28.68  |
| H | 0.702  | 22.249 | 28.898 |
| H | -0.586 | 21.467 | 29.045 |
| O | 5.952  | 18.576 | 19.433 |
| H | 5.514  | 18.456 | 18.59  |
| H | 5.714  | 17.799 | 19.939 |
| O | -2.298 | 15.588 | 24.218 |
| H | -2.658 | 14.751 | 24.512 |
| H | -1.978 | 16.006 | 25.017 |
| O | 3.936  | 14.242 | 23.031 |
| H | 4.497  | 14.869 | 23.488 |
| H | 4.467  | 13.449 | 22.964 |
| O | 7.095  | 14.612 | 22.691 |
| H | 6.512  | 13.853 | 22.725 |
| H | 6.612  | 15.262 | 22.181 |
| O | 9.885  | 13.752 | 27.538 |
| H | 9.767  | 14.519 | 26.978 |
| H | 9.197  | 13.146 | 27.263 |
| O | -4.391 | 25.11  | 27.004 |
| H | -4.704 | 24.867 | 27.875 |
| H | -3.506 | 24.748 | 26.958 |
| O | 7.159  | 22.846 | 27.443 |
| H | 6.724  | 22.14  | 26.966 |
| H | 8.092  | 22.703 | 27.283 |
| O | 0.597  | 4.48   | 13.467 |
| H | 0.46   | 4.072  | 14.322 |
| H | -0.182 | 4.245  | 12.963 |
| O | 2.71   | 22.58  | 29.1   |
| H | 3.03   | 22.393 | 29.982 |
| H | 3.072  | 23.441 | 28.891 |
| O | 11.231 | 12.624 | 10.348 |
| H | 10.447 | 13.071 | 10.029 |
| H | 10.926 | 12.11  | 11.095 |
| O | 11.791 | 27.443 | 14.058 |
| H | 11.435 | 28.315 | 13.887 |
| H | 12.277 | 27.539 | 14.877 |
| O | 8.956  | 26.307 | 24.924 |
| H | 9.414  | 26.885 | 24.314 |
| H | 8.115  | 26.131 | 24.501 |
| O | 6.548  | 22.41  | 14.208 |
| H | 7.191  | 23.002 | 14.599 |

|   |        |        |        |
|---|--------|--------|--------|
| H | 5.817  | 22.978 | 13.965 |
| O | 12.652 | 22.191 | 32.762 |
| H | 11.803 | 21.847 | 33.04  |
| H | 13.004 | 22.621 | 33.542 |
| O | 10.661 | 21.896 | 18.509 |
| H | 10.096 | 21.146 | 18.326 |
| H | 11.066 | 22.103 | 17.666 |
| O | 13.871 | 24.085 | 19.735 |
| H | 14.481 | 24.103 | 18.997 |
| H | 13.851 | 23.167 | 20.006 |
| O | 4.145  | 23.205 | 17.542 |
| H | 4.918  | 22.674 | 17.349 |
| H | 4.476  | 24.101 | 17.593 |
| O | 6.961  | 25.061 | 17.685 |
| H | 6.892  | 24.142 | 17.425 |
| H | 7.877  | 25.17  | 17.94  |
| O | 2.897  | 24.931 | 23.644 |
| H | 2.857  | 24.375 | 22.866 |
| H | 3.194  | 25.78  | 23.317 |
| O | -4.118 | 27.627 | 21.085 |
| H | -3.53  | 28.141 | 20.532 |
| H | -4.149 | 26.766 | 20.668 |
| O | 2.93   | 36.162 | 14.79  |
| H | 2.632  | 35.357 | 15.213 |
| H | 3.165  | 36.741 | 15.516 |
| O | 6.607  | 23.104 | 23.884 |
| H | 7.501  | 23.274 | 23.589 |
| H | 6.279  | 23.96  | 24.161 |
| O | 9.664  | 25.062 | 17.978 |
| H | 10.342 | 25.694 | 18.218 |
| H | 9.785  | 24.336 | 18.591 |
| O | -0.925 | 29.605 | 23.373 |
| H | -1.104 | 29.329 | 24.271 |
| H | -1.626 | 30.224 | 23.167 |
| O | 11.399 | 16.495 | 22.408 |
| H | 10.697 | 16.863 | 21.872 |
| H | 11.207 | 15.558 | 22.444 |
| O | 7.852  | 20.809 | 19.974 |
| H | 8.638  | 20.616 | 20.485 |
| H | 7.356  | 19.99  | 19.98  |
| O | 3.622  | 20.077 | 9.655  |
| H | 3.273  | 20.833 | 9.182  |
| H | 3.648  | 20.358 | 10.57  |
| O | 2.371  | 17.014 | 20.074 |
| H | 2.491  | 17.685 | 19.401 |
| H | 1.477  | 16.7   | 19.942 |
| O | -3.102 | 17.97  | 22.884 |

|   |        |        |        |
|---|--------|--------|--------|
| H | -2.848 | 17.305 | 23.524 |
| H | -2.282 | 18.409 | 22.657 |
| O | -1.802 | 10.387 | 12.553 |
| H | -1.257 | 9.774  | 12.058 |
| H | -1.203 | 10.782 | 13.187 |
| O | -1.451 | 29.787 | 17.854 |
| H | -2.289 | 29.7   | 17.4   |
| H | -1.144 | 30.664 | 17.626 |
| O | 3.063  | 20.708 | 23.639 |
| H | 2.935  | 21.418 | 23.009 |
| H | 3.272  | 19.945 | 23.101 |
| O | 2.805  | 22.898 | 21.847 |
| H | 3.678  | 22.614 | 21.576 |
| H | 2.388  | 23.195 | 21.038 |
| O | 13.395 | 28.201 | 23.074 |
| H | 13.882 | 28.629 | 22.37  |
| H | 14.066 | 27.76  | 23.596 |
| O | -3.014 | 32.541 | 15.388 |
| H | -2.076 | 32.601 | 15.571 |
| H | -3.234 | 31.626 | 15.563 |
| O | 0.689  | 26.328 | 33.05  |
| H | 0.161  | 26.625 | 33.791 |
| H | 1.202  | 25.599 | 33.399 |
| O | 3.888  | 29.09  | 27.065 |
| H | 4.373  | 29.162 | 27.887 |
| H | 4.531  | 29.304 | 26.389 |
| O | 12.049 | 19.901 | 8.462  |
| H | 12.65  | 20.578 | 8.148  |
| H | 11.844 | 19.384 | 7.683  |
| O | 0.044  | 20.116 | 8.474  |
| H | 0.869  | 19.704 | 8.73   |
| H | -0.062 | 19.888 | 7.55   |
| O | 10.24  | 12.814 | 24.075 |
| H | 10.97  | 12.542 | 24.632 |
| H | 9.796  | 13.496 | 24.579 |
| O | 2.841  | 26.378 | 10.191 |
| H | 2.017  | 26.021 | 9.859  |
| H | 3.435  | 25.628 | 10.215 |
| O | 9.76   | 23.119 | 26.966 |
| H | 10.405 | 23.387 | 26.312 |
| H | 10.14  | 22.339 | 27.371 |
| O | 3.214  | 18.631 | 18.165 |
| H | 3.745  | 18.976 | 18.883 |
| H | 3.042  | 19.39  | 17.608 |
| O | 3.006  | 17.176 | 12.097 |
| H | 2.075  | 17.237 | 12.311 |
| H | 3.381  | 16.656 | 12.808 |

|   |        |        |        |
|---|--------|--------|--------|
| O | 0.444  | 25.95  | 28.523 |
| H | 0.31   | 25.626 | 29.413 |
| H | -0.411 | 25.857 | 28.102 |
| O | 3.739  | 22.894 | 32.272 |
| H | 4.288  | 23.576 | 31.885 |
| H | 4.321  | 22.139 | 32.359 |
| O | 5.475  | 12.121 | 22.645 |
| H | 4.973  | 11.311 | 22.555 |
| H | 6.381  | 11.83  | 22.749 |
| O | -0.401 | 27.208 | 25.525 |
| H | 0.199  | 27.937 | 25.682 |
| H | 0.145  | 26.426 | 25.603 |
| O | 2.811  | 22.537 | 25.597 |
| H | 3.111  | 23.327 | 25.148 |
| H | 2.846  | 21.853 | 24.929 |
| O | 7.23   | 27.75  | 27.085 |
| H | 7.984  | 27.427 | 27.579 |
| H | 6.889  | 26.977 | 26.635 |
| O | 0.697  | 25.652 | 37.159 |
| H | 1.287  | 25.529 | 37.903 |
| H | 1.279  | 25.782 | 36.411 |
| O | 3.807  | 9.932  | 22.911 |
| H | 4.421  | 9.221  | 23.097 |
| H | 3.099  | 9.809  | 23.543 |
| O | 5.834  | 12.251 | 16.854 |
| H | 5.825  | 11.793 | 17.694 |
| H | 6.139  | 13.133 | 17.065 |
| O | 0.543  | 31.909 | 24.8   |
| H | -0.114 | 31.556 | 24.2   |
| H | 0.586  | 32.841 | 24.585 |
| O | 3.167  | 17.973 | 22.577 |
| H | 2.773  | 17.263 | 22.071 |
| H | 2.82   | 17.858 | 23.462 |
| O | 3.548  | 30.743 | 7.562  |
| H | 2.939  | 31.48  | 7.617  |
| H | 4.374  | 31.089 | 7.9    |
| O | 10.248 | 26.551 | 27.317 |
| H | 9.562  | 26.217 | 26.739 |
| H | 11.028 | 26.592 | 26.764 |
| O | 10.938 | 25.482 | 10.451 |
| H | 10.452 | 24.657 | 10.419 |
| H | 10.289 | 26.132 | 10.721 |
| O | 12.058 | 28.303 | 19.519 |
| H | 11.909 | 27.463 | 19.955 |
| H | 13.001 | 28.449 | 19.595 |
| O | 13.745 | 17.456 | 20.827 |
| H | 13.076 | 17.236 | 21.475 |

|   |        |        |        |
|---|--------|--------|--------|
| H | 14.137 | 16.615 | 20.591 |
| O | 6.782  | 20.841 | 25.312 |
| H | 6.627  | 21.586 | 24.731 |
| H | 6.897  | 20.097 | 24.721 |
| O | 11.816 | 17.793 | 11.359 |
| H | 11.079 | 18.144 | 10.858 |
| H | 11.92  | 16.898 | 11.036 |
| O | 9.025  | 16.854 | 19.004 |
| H | 8.315  | 16.214 | 18.943 |
| H | 9.761  | 16.438 | 18.555 |
| O | 13.391 | 19.569 | 19.23  |
| H | 13.448 | 18.728 | 19.684 |
| H | 13.011 | 19.356 | 18.378 |
| O | 11.715 | 23.683 | 25.15  |
| H | 12.547 | 24.072 | 25.421 |
| H | 11.84  | 23.474 | 24.224 |
| O | 7.732  | 18.176 | 24.152 |
| H | 7.122  | 17.44  | 24.199 |
| H | 8.104  | 18.123 | 23.271 |
| O | 5.621  | 25.486 | 20.153 |
| H | 5.983  | 25.653 | 19.283 |
| H | 6.091  | 24.712 | 20.463 |
| O | 5.32   | 22.322 | 21.67  |
| H | 6.092  | 22.527 | 21.143 |
| H | 5.642  | 22.305 | 22.571 |
| O | 12.188 | 18.638 | 16.715 |
| H | 11.316 | 18.952 | 16.956 |
| H | 12.112 | 17.684 | 16.734 |
| O | 9.794  | 10.468 | 20.236 |
| H | 10.355 | 10.99  | 19.662 |
| H | 9.09   | 10.159 | 19.665 |
| O | 13.658 | 12.892 | 20.644 |
| H | 13.429 | 12.414 | 21.441 |
| H | 14.376 | 13.467 | 20.907 |
| O | 2.336  | 9.265  | 12.552 |
| H | 2.854  | 8.755  | 13.174 |
| H | 2.247  | 10.125 | 12.963 |
| O | 9.594  | 16.736 | 13.997 |
| H | 8.962  | 16.461 | 13.332 |
| H | 10.407 | 16.876 | 13.511 |
| O | 17.38  | 30.188 | 18.043 |
| H | 18.272 | 30.094 | 17.707 |
| H | 17.324 | 31.103 | 18.321 |
| O | -1.824 | 31.081 | 27.399 |
| H | -2.067 | 30.56  | 26.634 |
| H | -1.511 | 30.438 | 28.036 |
| O | 5.801  | 7.94   | 23.263 |

|   |        |        |        |
|---|--------|--------|--------|
| H | 6.176  | 7.558  | 22.469 |
| H | 6.547  | 8.33   | 23.717 |
| O | 8.209  | 11.513 | 22.52  |
| H | 8.718  | 11.925 | 23.218 |
| H | 8.862  | 11.248 | 21.872 |
| O | 13.389 | 36.601 | 21.847 |
| H | 13.477 | 37.535 | 22.032 |
| H | 13.2   | 36.204 | 22.697 |
| O | 7.829  | 9.796  | 18.602 |
| H | 7.495  | 10.285 | 17.85  |
| H | 7.045  | 9.541  | 19.089 |
| O | 11.432 | 11.927 | 18.648 |
| H | 12.173 | 12.179 | 19.199 |
| H | 11.833 | 11.54  | 17.87  |
| O | 11.769 | 31.239 | 22.444 |
| H | 11.551 | 31.93  | 21.819 |
| H | 12.455 | 30.731 | 22.01  |
| O | 6.681  | 27.123 | 23.008 |
| H | 5.769  | 27.05  | 22.729 |
| H | 6.704  | 27.913 | 23.548 |
| O | -2.175 | 13.937 | 17.546 |
| H | -2.238 | 14.699 | 18.122 |
| H | -2.665 | 14.187 | 16.763 |
| O | 9.214  | 13.612 | 19.182 |
| H | 9.396  | 13.701 | 20.117 |
| H | 10.013 | 13.233 | 18.817 |
| O | 7.666  | 11.916 | 13.472 |
| H | 6.942  | 12.444 | 13.808 |
| H | 7.965  | 12.387 | 12.694 |
| O | 5.693  | 11.921 | 19.766 |
| H | 5.869  | 11.703 | 20.681 |
| H | 4.93   | 12.497 | 19.8   |
| O | 1.54   | 14.161 | 11.674 |
| H | 1.186  | 14.742 | 12.347 |
| H | 1.623  | 14.716 | 10.899 |
| O | 10.686 | 12.27  | 7.219  |
| H | 11.354 | 12.953 | 7.163  |
| H | 10.375 | 12.165 | 6.32   |
| O | 0.943  | 35.874 | 29.086 |
| H | 0.396  | 35.122 | 29.312 |
| H | 0.321  | 36.579 | 28.912 |
| O | 13.397 | 30.79  | 18.424 |
| H | 14.179 | 30.387 | 18.046 |
| H | 12.776 | 30.836 | 17.698 |
| O | -2.09  | 13.705 | 21.098 |
| H | -1.37  | 13.167 | 20.768 |
| H | -1.816 | 13.957 | 21.98  |



|   |        |        |        |
|---|--------|--------|--------|
| O | 13.498 | 23.594 | 28.622 |
| H | 12.553 | 23.691 | 28.74  |
| H | 13.757 | 22.952 | 29.283 |
| O | 6.528  | 8.82   | 3.063  |
| H | 7.205  | 8.187  | 2.822  |
| H | 6.015  | 8.377  | 3.739  |
| O | -4.094 | 14.454 | 0.92   |
| H | -4.769 | 14.833 | 1.483  |
| H | -4.574 | 14.126 | 0.159  |
| O | 12.203 | 33.25  | 4.809  |
| H | 12.218 | 34.197 | 4.67   |
| H | 13.049 | 32.947 | 4.479  |
| O | 2.062  | 28.202 | -2.598 |
| H | 2.494  | 28.874 | -2.07  |
| H | 1.242  | 28.026 | -2.136 |
| O | 9.938  | 19.412 | 1.551  |
| H | 10.114 | 20.296 | 1.228  |
| H | 9.648  | 19.541 | 2.454  |
| O | 6.583  | 14.883 | 5.755  |
| H | 7.207  | 14.591 | 5.091  |
| H | 5.787  | 15.086 | 5.263  |
| O | 16.105 | 16.763 | 3.636  |
| H | 16.821 | 16.67  | 4.264  |
| H | 15.686 | 17.591 | 3.871  |
| O | 6.267  | 6.648  | -0.322 |
| H | 5.692  | 6.794  | 0.429  |
| H | 6.555  | 7.524  | -0.579 |
| O | 10.653 | 28.001 | 3.578  |
| H | 10.252 | 28.245 | 4.412  |
| H | 11.264 | 27.299 | 3.802  |
| O | 13.335 | 12.742 | 6.047  |
| H | 13.857 | 13.049 | 5.305  |
| H | 13.637 | 11.846 | 6.198  |
| O | 8.519  | 17.35  | -3.66  |
| H | 9.073  | 18.119 | -3.798 |
| H | 9.028  | 16.791 | -3.073 |
| O | 1.221  | 30.034 | 3.261  |
| H | 2.039  | 29.965 | 2.769  |
| H | 1.22   | 29.267 | 3.834  |
| O | 8.369  | 10.942 | 1.392  |
| H | 9.069  | 10.522 | 1.893  |
| H | 8.237  | 10.367 | 0.638  |
| O | 6.278  | 17.826 | 3.608  |
| H | 6.656  | 17.542 | 2.776  |
| H | 7.02   | 17.846 | 4.214  |
| O | 9.629  | 18.166 | 9.629  |
| H | 9.616  | 19.117 | 9.523  |

|   |        |        |        |
|---|--------|--------|--------|
| H | 9.709  | 17.826 | 8.738  |
| O | 5.063  | 24.442 | 10.093 |
| H | 5.896  | 23.983 | 10.194 |
| H | 4.886  | 24.811 | 10.959 |
| O | 12.797 | 27.735 | 16.632 |
| H | 13.598 | 28.062 | 17.042 |
| H | 12.148 | 28.42  | 16.794 |
| O | 14.144 | 23.825 | 13.705 |
| H | 13.517 | 23.919 | 12.988 |
| H | 13.619 | 23.931 | 14.498 |
| O | 6.347  | 19.761 | 0.567  |
| H | 5.712  | 19.174 | 0.156  |
| H | 6.68   | 19.267 | 1.316  |
| O | 7.259  | 16.936 | 1.239  |
| H | 7.069  | 16.028 | 1.475  |
| H | 8.105  | 16.896 | 0.793  |
| O | -2.548 | 14.868 | 5.767  |
| H | -2.498 | 14.21  | 5.073  |
| H | -2.55  | 14.36  | 6.578  |
| O | 10.591 | 11.047 | 13.167 |
| H | 10.524 | 10.598 | 12.324 |
| H | 9.697  | 11.329 | 13.36  |
| O | 10.395 | 15.963 | 16.906 |
| H | 10.18  | 16.562 | 16.192 |
| H | 10.939 | 15.289 | 16.497 |
| O | -1.27  | 9.113  | 3.549  |
| H | -1.765 | 8.33   | 3.308  |
| H | -1.605 | 9.351  | 4.414  |
| O | 2.369  | 20.936 | 16.579 |
| H | 2.599  | 21.81  | 16.895 |
| H | 2.884  | 20.828 | 15.779 |
| O | -1.703 | 4.3    | 17.364 |
| H | -1.979 | 4.717  | 16.548 |
| H | -2.461 | 3.785  | 17.638 |
| O | -0.685 | 22.287 | 1.837  |
| H | -0.654 | 23.236 | 1.719  |
| H | -0.588 | 22.159 | 2.781  |
| O | 9.637  | 23.059 | -3.854 |
| H | 9.336  | 22.867 | -4.742 |
| H | 10.592 | 23.028 | -3.912 |
| O | 7.117  | 15.764 | 8.27   |
| H | 7.083  | 15.561 | 7.336  |
| H | 6.978  | 16.71  | 8.315  |
| O | 1.521  | 15.429 | 6.004  |
| H | 1.234  | 15.105 | 5.15   |
| H | 1.034  | 14.9   | 6.636  |
| O | 3.553  | 18.938 | 1.667  |

|   |        |        |        |
|---|--------|--------|--------|
| H | 3.636  | 19.823 | 1.311  |
| H | 3.684  | 19.046 | 2.609  |
| O | 4.072  | 28.338 | 4.838  |
| H | 3.437  | 28.826 | 5.363  |
| H | 4.26   | 27.556 | 5.357  |
| O | 2.032  | 21.979 | -4.378 |
| H | 1.79   | 22.904 | -4.341 |
| H | 2.959  | 21.965 | -4.14  |
| O | 4.287  | 20.602 | 14.618 |
| H | 3.741  | 20.459 | 13.845 |
| H | 4.955  | 21.224 | 14.329 |
| O | 7.813  | 20.902 | -1.679 |
| H | 7.262  | 20.877 | -2.461 |
| H | 7.511  | 20.164 | -1.149 |
| O | 5.9    | 29.231 | 3.113  |
| H | 5.285  | 28.714 | 3.633  |
| H | 6.289  | 29.841 | 3.74   |
| O | 1.312  | 25.889 | 0.077  |
| H | 1.844  | 25.382 | -0.536 |
| H | 0.796  | 26.473 | -0.479 |
| O | 7.573  | 23.175 | 10.839 |
| H | 7.836  | 24.081 | 10.673 |
| H | 8.05   | 22.929 | 11.631 |
| O | 3.145  | 22.676 | 8.585  |
| H | 3.158  | 23.015 | 7.69   |
| H | 3.698  | 23.282 | 9.079  |
| O | 6.887  | 20.784 | 9.6    |
| H | 7.817  | 20.56  | 9.561  |
| H | 6.858  | 21.603 | 10.096 |
| O | 6.694  | 24.942 | -1.355 |
| H | 7.6    | 24.661 | -1.227 |
| H | 6.186  | 24.39  | -0.76  |
| O | 6.323  | 18.353 | 8.257  |
| H | 6.012  | 19.126 | 8.728  |
| H | 5.871  | 18.388 | 7.414  |
| O | 4.116  | 12.802 | 1.411  |
| H | 4.546  | 13.374 | 0.775  |
| H | 3.413  | 13.338 | 1.778  |
| O | 9.186  | 13.103 | -0.426 |
| H | 8.359  | 13.358 | -0.017 |
| H | 8.947  | 12.401 | -1.032 |
| O | 9.409  | 22.566 | 7.426  |
| H | 8.464  | 22.428 | 7.36   |
| H | 9.677  | 22.815 | 6.542  |
| O | -1.101 | 30.124 | 9.972  |
| H | -1.388 | 30.48  | 9.131  |
| H | -0.159 | 29.99  | 9.867  |

|   |        |        |        |
|---|--------|--------|--------|
| O | 3.108  | 27.909 | 7.653  |
| H | 3.336  | 27.539 | 8.506  |
| H | 3.304  | 28.842 | 7.737  |
| O | 9.057  | 23.509 | -1.286 |
| H | 9.566  | 23.586 | -2.093 |
| H | 8.602  | 22.671 | -1.37  |
| O | 9.797  | 21.03  | 9.54   |
| H | 9.533  | 21.561 | 8.789  |
| H | 10.71  | 20.803 | 9.363  |
| O | 6.673  | 22.258 | 17.41  |
| H | 7.084  | 21.819 | 16.666 |
| H | 6.78   | 21.646 | 18.138 |
| O | 8.394  | 16.093 | 11.363 |
| H | 7.605  | 16.596 | 11.163 |
| H | 9.018  | 16.343 | 10.681 |
| O | 4.437  | 19.034 | 5.954  |
| H | 3.75   | 18.373 | 6.044  |
| H | 4.103  | 19.637 | 5.289  |
| O | -1.67  | 28.495 | 4.308  |
| H | -2.555 | 28.156 | 4.171  |
| H | -1.096 | 27.815 | 3.957  |
| O | 4.5    | 22.689 | 5.798  |
| H | 5.311  | 22.579 | 6.294  |
| H | 4.65   | 23.467 | 5.262  |
| O | 2.265  | 18.1   | 8.624  |
| H | 2.793  | 18.662 | 9.192  |
| H | 2.768  | 18.039 | 7.812  |
| O | 8.834  | 18.89  | 17.17  |
| H | 7.909  | 19.045 | 17.361 |
| H | 9.099  | 18.217 | 17.796 |
| O | -2.468 | 5.956  | 7.283  |
| H | -2.212 | 6.328  | 8.128  |
| H | -1.641 | 5.704  | 6.872  |
| O | 3.736  | 33.575 | 7.3    |
| H | 3.449  | 34.273 | 7.888  |
| H | 4.449  | 33.965 | 6.795  |
| O | 5.601  | 26.349 | 6.645  |
| H | 5.257  | 26.01  | 7.471  |
| H | 6.042  | 25.6   | 6.244  |
| O | 10.504 | 21.795 | 0.622  |
| H | 10.088 | 22.637 | 0.436  |
| H | 11.442 | 21.985 | 0.618  |
| O | 0.454  | 25.808 | 7.932  |
| H | 0.362  | 25.491 | 7.033  |
| H | -0.305 | 26.374 | 8.066  |
| O | 12.999 | 21.339 | 11.572 |
| H | 13.49  | 20.648 | 11.127 |

|   |        |        |        |
|---|--------|--------|--------|
| H | 13.041 | 21.105 | 12.499 |
| O | 14.359 | 10.374 | 11.812 |
| H | 14.1   | 11.124 | 12.348 |
| H | 14.963 | 9.881  | 12.367 |
| O | 9.938  | 16.672 | 7.181  |
| H | 10.782 | 16.242 | 7.046  |
| H | 9.477  | 16.107 | 7.8    |
| O | 4.003  | 20.827 | 4.023  |
| H | 4.655  | 21.054 | 3.36   |
| H | 4.101  | 21.502 | 4.695  |
| O | 15.176 | 19.818 | 2.011  |
| H | 14.668 | 19.297 | 2.633  |
| H | 15.319 | 20.652 | 2.458  |
| O | 1.502  | 15.736 | 9.446  |
| H | 1.657  | 16.649 | 9.206  |
| H | 2.158  | 15.244 | 8.953  |
| O | 1.784  | 32.538 | 4.167  |
| H | 1.819  | 31.598 | 3.99   |
| H | 2.382  | 32.924 | 3.528  |
| O | -0.519 | 18.401 | 14.158 |
| H | -0.326 | 19.122 | 13.558 |
| H | -1.386 | 18.094 | 13.893 |
| O | 2.411  | 14.718 | 2.691  |
| H | 3.062  | 15.193 | 3.209  |
| H | 1.57   | 15.073 | 2.98   |
| O | 15.913 | 29.208 | 6.212  |
| H | 16.614 | 28.98  | 6.822  |
| H | 15.124 | 29.235 | 6.754  |
| O | 1.995  | 7.346  | 3.615  |
| H | 2.278  | 7.462  | 4.522  |
| H | 1.972  | 8.233  | 3.256  |
| O | 5.342  | 14.141 | 10.291 |
| H | 4.54   | 14.325 | 10.78  |
| H | 5.543  | 14.962 | 9.842  |
| O | -1.329 | 31.637 | 3.458  |
| H | -1.147 | 30.716 | 3.645  |
| H | -0.486 | 32.076 | 3.574  |
| O | 5.736  | 23.009 | 0.122  |
| H | 6.202  | 22.184 | 0.258  |
| H | 4.838  | 22.825 | 0.398  |
| O | 1.297  | 8.979  | -1.246 |
| H | 2.056  | 9.269  | -0.739 |
| H | 0.989  | 8.196  | -0.79  |
| O | 4.556  | 22.231 | -3.63  |
| H | 4.662  | 21.332 | -3.319 |
| H | 5.377  | 22.664 | -3.398 |
| O | 9.369  | 2.092  | -4.177 |

|   |        |        |        |
|---|--------|--------|--------|
| H | 8.754  | 2.203  | -3.452 |
| H | 10.049 | 1.515  | -3.829 |
| O | 10.184 | 4.776  | -2.467 |
| H | 10.047 | 3.92   | -2.871 |
| H | 11.036 | 5.063  | -2.797 |
| O | 6.095  | 35.075 | 6.067  |
| H | 5.64   | 35.91  | 6.176  |
| H | 5.667  | 34.665 | 5.315  |
| O | -1.665 | 5.537  | 14.66  |
| H | -1.321 | 5.617  | 13.77  |
| H | -2.594 | 5.753  | 14.578 |
| O | 9.744  | 32.075 | 10.453 |
| H | 9.088  | 32.305 | 9.796  |
| H | 10.36  | 31.509 | 9.988  |
| O | 0.57   | -2.186 | 50.478 |
| H | 0.652  | -1.251 | 50.293 |
| H | 1.331  | -2.391 | 51.021 |
| O | -0.822 | 9.159  | 52.891 |
| H | -1.418 | 8.688  | 53.473 |
| H | 0.02   | 9.143  | 53.346 |
| O | 15.169 | 3.732  | 49.514 |
| H | 14.469 | 3.162  | 49.832 |
| H | 15.66  | 3.187  | 48.899 |
| O | 4.167  | 7.821  | 56.02  |
| H | 3.917  | 7.654  | 55.112 |
| H | 4.502  | 6.982  | 56.335 |
| O | 2.975  | -3.044 | 52.18  |
| H | 3.507  | -2.475 | 52.736 |
| H | 3.597  | -3.419 | 51.556 |
| O | 3.487  | 7.879  | 53.355 |
| H | 3.36   | 8.827  | 53.31  |
| H | 4.187  | 7.701  | 52.727 |
| O | 6.776  | 8.281  | 56.782 |
| H | 5.911  | 8.281  | 56.372 |
| H | 7.117  | 7.402  | 56.622 |
| O | 12.625 | 11.923 | 57.843 |
| H | 11.996 | 11.49  | 57.266 |
| H | 13.481 | 11.658 | 57.506 |
| O | 10.438 | 10.605 | 54.142 |
| H | 11.251 | 11.056 | 53.918 |
| H | 10.116 | 10.263 | 53.308 |
| O | 1.819  | 5.189  | 50.527 |
| H | 1.23   | 4.696  | 49.956 |
| H | 1.332  | 5.984  | 50.744 |
| O | 7.551  | 1.836  | 56.924 |
| H | 8.209  | 1.536  | 57.552 |
| H | 7.156  | 2.602  | 57.34  |

|   |        |        |        |
|---|--------|--------|--------|
| O | 7.145  | 3.155  | 50.875 |
| H | 6.484  | 3.605  | 50.349 |
| H | 6.738  | 2.32   | 51.108 |
| O | -1.026 | 5.379  | 55.83  |
| H | -1.468 | 6.221  | 55.941 |
| H | -1.101 | 5.19   | 54.895 |
| O | -4.001 | 6.68   | 52.631 |
| H | -3.161 | 6.899  | 53.035 |
| H | -4.196 | 7.426  | 52.064 |
| O | 8.249  | 7.971  | 51.152 |
| H | 8.446  | 8.873  | 51.408 |
| H | 8.718  | 7.433  | 51.79  |
| O | 6.183  | 11.313 | 54.302 |
| H | 6.456  | 10.41  | 54.464 |
| H | 6.887  | 11.846 | 54.671 |
| O | 3.999  | 1.83   | 54.053 |
| H | 3.926  | 2.379  | 54.834 |
| H | 3.284  | 2.122  | 53.488 |
| O | 10.074 | 5.571  | 59.339 |
| H | 10.039 | 5.132  | 58.489 |
| H | 10.398 | 4.902  | 59.941 |
| O | 10.509 | 9.513  | 56.495 |
| H | 10.271 | 9.787  | 55.608 |
| H | 11.252 | 8.922  | 56.372 |
| O | -3.02  | 11.292 | 49.078 |
| H | -3.848 | 11.42  | 48.616 |
| H | -2.505 | 10.733 | 48.496 |
| O | 3.786  | 4.222  | 37.576 |
| H | 4.313  | 4.339  | 38.366 |
| H | 3.075  | 3.641  | 37.846 |
| O | 9.003  | 12.875 | 52.239 |
| H | 8.516  | 12.65  | 53.032 |
| H | 9.69   | 13.469 | 52.542 |
| O | 9.448  | -1.094 | 47.925 |
| H | 9.452  | -2.048 | 48.003 |
| H | 9.057  | -0.788 | 48.743 |
| O | 0.206  | 6.774  | 59.63  |
| H | -0.191 | 7.349  | 60.284 |
| H | 0.187  | 5.906  | 60.032 |
| O | -1.285 | 6.248  | 52.777 |
| H | -1.402 | 6.254  | 51.827 |
| H | -0.336 | 6.262  | 52.902 |
| O | 3.976  | 10.861 | 56.904 |
| H | 3.961  | 9.915  | 56.759 |
| H | 3.857  | 10.961 | 57.849 |
| O | 6.552  | 10.059 | 46.707 |
| H | 5.695  | 9.856  | 47.082 |

|   |        |        |        |
|---|--------|--------|--------|
| H | 7.063  | 10.391 | 47.445 |
| O | 9.324  | 7.043  | 48.595 |
| H | 10.28  | 7.043  | 48.552 |
| H | 9.124  | 7.369  | 49.472 |
| O | 5.319  | 7.478  | 51.333 |
| H | 6.269  | 7.414  | 51.231 |
| H | 5.092  | 8.321  | 50.942 |
| O | -0.205 | 7.83   | 50.469 |
| H | -0.614 | 8.306  | 49.746 |
| H | -0.416 | 8.348  | 51.246 |
| O | 4.908  | 5.198  | 50.166 |
| H | 4.064  | 4.951  | 50.545 |
| H | 4.993  | 6.132  | 50.36  |
| O | 3.995  | 2.308  | 57.277 |
| H | 4.854  | 2.401  | 57.689 |
| H | 3.601  | 1.552  | 57.713 |
| O | 0.739  | 12.093 | 43.509 |
| H | 1.45   | 11.889 | 44.116 |
| H | 0.751  | 11.376 | 42.875 |
| O | 2.898  | 8.699  | 39.407 |
| H | 2.987  | 8.917  | 38.479 |
| H | 3.793  | 8.526  | 39.699 |
| O | -4.071 | 15.429 | 48.885 |
| H | -4.916 | 15.397 | 49.333 |
| H | -3.456 | 15.037 | 49.504 |
| O | 2.65   | 10.491 | 53.065 |
| H | 3.46   | 10.927 | 52.799 |
| H | 1.981  | 10.854 | 52.485 |
| O | -4.962 | 9.136  | 51.206 |
| H | -5.764 | 9.58   | 50.932 |
| H | -4.345 | 9.846  | 51.386 |
| O | 4.183  | 7.581  | 41.717 |
| H | 4.894  | 7.766  | 41.102 |
| H | 3.939  | 6.673  | 41.534 |
| O | 4.401  | 4.939  | 56.42  |
| H | 4.315  | 3.998  | 56.573 |
| H | 3.568  | 5.306  | 56.717 |
| O | 7.593  | 7.778  | 45.672 |
| H | 7.353  | 7.187  | 46.386 |
| H | 7.233  | 8.626  | 45.932 |
| O | 10.176 | 4.222  | 48.711 |
| H | 10.095 | 3.824  | 47.844 |
| H | 9.571  | 4.963  | 48.692 |
| O | 5.941  | 4.441  | 61.259 |
| H | 5.136  | 4.062  | 61.612 |
| H | 5.783  | 4.502  | 60.317 |
| O | 12.493 | -7.32  | 44.153 |



|   |        |        |        |
|---|--------|--------|--------|
| H | 11.745 | -6.81  | 44.464 |
| H | 12.472 | -8.12  | 44.678 |
| O | 7.373  | -1.001 | 61.176 |
| H | 8.025  | -0.353 | 61.444 |
| H | 7.516  | -1.742 | 61.764 |
| O | 13.664 | 14.624 | 54.904 |
| H | 13.383 | 15.064 | 54.102 |
| H | 14.575 | 14.382 | 54.739 |
| O | 15.692 | 9.646  | 52.796 |
| H | 15.138 | 8.867  | 52.853 |
| H | 16.45  | 9.364  | 52.284 |
| O | 1.242  | 5.971  | 53.849 |
| H | 1.142  | 6.287  | 54.747 |
| H | 2.022  | 6.42   | 53.522 |
| O | 6.568  | 19.47  | 54.832 |
| H | 7.385  | 19.048 | 55.097 |
| H | 6.659  | 19.597 | 53.887 |
| O | 3.334  | 2.841  | 45.985 |
| H | 3.508  | 3.762  | 46.18  |
| H | 3.329  | 2.412  | 46.84  |
| O | 7.54   | 4.209  | 40.166 |
| H | 7.014  | 3.562  | 40.634 |
| H | 7.72   | 3.804  | 39.317 |
| O | 9.244  | 12.973 | 40.275 |
| H | 10.131 | 13.168 | 39.972 |
| H | 8.924  | 13.802 | 40.629 |
| O | 13.051 | 9.949  | 32.559 |
| H | 12.375 | 9.828  | 31.892 |
| H | 12.567 | 10.006 | 33.382 |
| O | 0.007  | 1.89   | 40.975 |
| H | 0.385  | 1.072  | 40.653 |
| H | -0.471 | 1.638  | 41.765 |
| O | 8.699  | 3.862  | 37.568 |
| H | 9.544  | 3.637  | 37.958 |
| H | 8.816  | 4.755  | 37.242 |
| O | 10.533 | 16.274 | 46.028 |
| H | 9.754  | 16.5   | 46.536 |
| H | 11.027 | 15.685 | 46.598 |
| O | 2.082  | 16.937 | 37.507 |
| H | 1.71   | 16.122 | 37.844 |
| H | 2.545  | 16.678 | 36.71  |
| O | 6.045  | 2.317  | 42.324 |
| H | 5.492  | 3.086  | 42.466 |
| H | 5.427  | 1.592  | 42.232 |
| O | 4.73   | 8.224  | 32.637 |
| H | 5.443  | 8.856  | 32.725 |
| H | 5.104  | 7.396  | 32.94  |

|   |        |        |        |
|---|--------|--------|--------|
| O | -0.157 | 4.497  | 32.318 |
| H | -0.587 | 5.093  | 31.704 |
| H | -0.004 | 3.7    | 31.811 |
| O | 1.251  | -0.317 | 39.883 |
| H | 0.57   | -0.578 | 39.263 |
| H | 1.432  | -1.109 | 40.389 |
| O | 10.816 | 3.63   | 39.321 |
| H | 10.805 | 4.558  | 39.087 |
| H | 11.043 | 3.62   | 40.251 |
| O | 7.663  | 18.981 | 42.955 |
| H | 8.043  | 18.129 | 43.168 |
| H | 7.994  | 19.567 | 43.636 |
| O | 2.926  | 2.509  | 30.611 |
| H | 2.105  | 2.073  | 30.841 |
| H | 2.914  | 2.553  | 29.655 |
| O | 10.806 | 5.574  | 35.85  |
| H | 10.994 | 4.64   | 35.948 |
| H | 11.252 | 5.824  | 35.041 |
| O | 7.563  | 5.874  | 56.085 |
| H | 8.356  | 5.539  | 56.504 |
| H | 6.961  | 5.129  | 56.081 |
| O | 11.173 | 2.423  | 41.91  |
| H | 10.596 | 1.799  | 41.469 |
| H | 11.109 | 2.193  | 42.837 |
| O | 1.155  | 8.245  | 44.463 |
| H | 1.817  | 8.935  | 44.506 |
| H | 1.234  | 7.785  | 45.299 |
| O | 6.734  | 12.194 | 35.996 |
| H | 6.274  | 12.696 | 35.323 |
| H | 6.1    | 12.11  | 36.708 |
| O | 4.979  | 20.94  | 37.624 |
| H | 4.868  | 20.036 | 37.33  |
| H | 4.131  | 21.352 | 37.459 |
| O | 3.556  | 11.685 | 28.609 |
| H | 3.343  | 11.391 | 27.723 |
| H | 3.509  | 10.891 | 29.142 |
| O | 3.666  | 6.912  | 36.707 |
| H | 2.72   | 6.974  | 36.841 |
| H | 3.878  | 6.001  | 36.912 |
| O | -1.366 | 1.093  | 43.125 |
| H | -2.056 | 1.384  | 43.722 |
| H | -0.965 | 0.347  | 43.57  |
| O | 0.129  | 4.188  | 48.641 |
| H | -0.595 | 3.68   | 49.008 |
| H | 0.006  | 4.129  | 47.694 |
| O | 0.394  | 4.193  | 35.181 |
| H | -0.522 | 3.933  | 35.276 |

|   |        |        |        |
|---|--------|--------|--------|
| H | 0.442  | 4.592  | 34.313 |
| O | 5.803  | 8.116  | 39.637 |
| H | 5.857  | 7.345  | 39.071 |
| H | 6.653  | 8.15   | 40.076 |
| O | 3.865  | 11.074 | 42.723 |
| H | 4.567  | 11.312 | 42.117 |
| H | 3.404  | 10.358 | 42.287 |
| O | 2.185  | 10.896 | 32.103 |
| H | 1.246  | 11.058 | 32.017 |
| H | 2.42   | 10.424 | 31.304 |
| O | 1.436  | 15.386 | 43.504 |
| H | 1.089  | 14.885 | 44.243 |
| H | 0.797  | 15.254 | 42.804 |
| O | 7.454  | -3.953 | 33.709 |
| H | 7.607  | -4.367 | 32.86  |
| H | 7.815  | -3.071 | 33.614 |
| O | 18.193 | -0.555 | 43.873 |
| H | 17.486 | -1.03  | 44.309 |
| H | 17.772 | 0.227  | 43.515 |
| O | 5.864  | 5.541  | 32.413 |
| H | 6.521  | 4.939  | 32.762 |
| H | 5.032  | 5.206  | 32.746 |
| O | 6.064  | 10.055 | 34.282 |
| H | 5.165  | 10.381 | 34.31  |
| H | 6.494  | 10.476 | 35.026 |
| O | 5.303  | 2.688  | 35.173 |
| H | 4.818  | 3.159  | 34.496 |
| H | 4.815  | 2.858  | 35.979 |
| O | 8.816  | 7.358  | 34.476 |
| H | 9.398  | 6.934  | 35.106 |
| H | 7.941  | 7.057  | 34.717 |
| O | 3.079  | 5.082  | 47.838 |
| H | 2.526  | 4.528  | 48.39  |
| H | 3.76   | 5.405  | 48.428 |
| O | 2.067  | 12.44  | 39.74  |
| H | 2.319  | 12.382 | 40.662 |
| H | 1.254  | 11.94  | 39.682 |
| O | 3.592  | 3.986  | 33.409 |
| H | 2.897  | 4.285  | 33.995 |
| H | 3.143  | 3.441  | 32.763 |
| O | 7.632  | 12.408 | 45.058 |
| H | 8.343  | 12.168 | 44.464 |
| H | 7.461  | 11.612 | 45.561 |
| O | 8.612  | 10.799 | 32.294 |
| H | 8.726  | 11.663 | 32.689 |
| H | 7.722  | 10.541 | 32.533 |
| O | 2.296  | 3.523  | 52.589 |

|   |        |        |        |
|---|--------|--------|--------|
| H | 2.268  | 4.244  | 53.218 |
| H | 2.051  | 3.923  | 51.755 |
| O | 5.771  | 11.626 | 30.677 |
| H | 6.563  | 12.163 | 30.692 |
| H | 6.091  | 10.731 | 30.559 |
| O | -1.642 | 7.814  | 38.641 |
| H | -2.262 | 7.085  | 38.659 |
| H | -0.866 | 7.48   | 39.091 |
| O | 8.4    | 1.026  | 42.302 |
| H | 7.626  | 1.581  | 42.204 |
| H | 8.853  | 1.098  | 41.462 |
| O | 5.899  | 4.908  | 44.898 |
| H | 5.977  | 5.342  | 45.747 |
| H | 6.781  | 4.585  | 44.712 |
| O | 1.995  | 6.764  | 23.955 |
| H | 2.702  | 7.174  | 24.453 |
| H | 2.087  | 7.119  | 23.071 |
| O | 3.206  | 13.698 | 47.277 |
| H | 2.784  | 13.047 | 47.837 |
| H | 2.48   | 14.179 | 46.879 |
| O | 6.552  | 9.416  | 43.538 |
| H | 5.619  | 9.617  | 43.474 |
| H | 6.582  | 8.53   | 43.899 |
| O | 8.077  | 8.685  | 24.522 |
| H | 8.487  | 8.659  | 25.387 |
| H | 8.712  | 8.264  | 23.943 |
| O | 6.945  | 1.877  | 32.026 |
| H | 6.252  | 1.217  | 32.026 |
| H | 7.348  | 1.801  | 31.161 |
| O | -3.481 | 6.651  | 44.494 |
| H | -2.66  | 6.73   | 44.981 |
| H | -3.27  | 6.97   | 43.616 |
| O | 7.804  | 6.231  | 27.657 |
| H | 7.975  | 6.122  | 28.593 |
| H | 7.777  | 5.338  | 27.313 |
| O | 5.621  | 0.299  | 45.013 |
| H | 4.737  | 0.513  | 45.313 |
| H | 6.198  | 0.707  | 45.658 |
| O | -0.75  | 10.29  | 31.239 |
| H | -0.907 | 10.041 | 32.149 |
| H | -1.296 | 9.692  | 30.729 |
| O | 0.063  | 2.376  | 28.092 |
| H | -0.113 | 2.057  | 28.977 |
| H | -0.384 | 3.221  | 28.048 |
| O | 6.61   | 5.685  | 47.337 |
| H | 7.496  | 5.74   | 47.696 |
| H | 6.037  | 5.812  | 48.093 |

|   |        |        |        |
|---|--------|--------|--------|
| O | 1.969  | 9.459  | 42.058 |
| H | 2.355  | 8.873  | 41.407 |
| H | 1.306  | 8.926  | 42.496 |
| O | -1.02  | 9.097  | 33.707 |
| H | -0.072 | 8.964  | 33.72  |
| H | -1.339 | 8.619  | 34.473 |
| O | 9.628  | 2.981  | 52.457 |
| H | 9.436  | 2.68   | 53.345 |
| H | 8.796  | 2.899  | 51.991 |
| O | 13.761 | -1.177 | 45.351 |
| H | 13.078 | -1.839 | 45.463 |
| H | 14.538 | -1.676 | 45.099 |
| O | 5.895  | 15.66  | 40.88  |
| H | 5.085  | 15.346 | 41.281 |
| H | 6.541  | 15.627 | 41.586 |
| O | 4.12   | 15.364 | 28.381 |
| H | 4.653  | 14.663 | 28.755 |
| H | 3.351  | 15.41  | 28.949 |
| O | 8.657  | 10.256 | 38.824 |
| H | 8.341  | 9.777  | 39.591 |
| H | 8.534  | 11.178 | 39.051 |
| O | 6.351  | 13.39  | 25.427 |
| H | 6.31   | 13.367 | 26.383 |
| H | 6.419  | 12.471 | 25.168 |
| O | 4.946  | 1.525  | 38.155 |
| H | 4.187  | 2.08   | 37.975 |
| H | 4.614  | 0.849  | 38.745 |
| O | 11.233 | 2.959  | 36.554 |
| H | 10.694 | 2.186  | 36.383 |
| H | 11.476 | 2.882  | 37.477 |
| O | -0.225 | 5.928  | 43.153 |
| H | -1.105 | 6.098  | 42.819 |
| H | 0.041  | 6.753  | 43.558 |
| O | 11.68  | 2.524  | 32.402 |
| H | 10.965 | 2.142  | 31.893 |
| H | 12.276 | 2.885  | 31.745 |
| O | 13.497 | 2.993  | 34.822 |
| H | 12.629 | 3.216  | 35.157 |
| H | 13.521 | 3.375  | 33.945 |
| O | 14.943 | 0.874  | 39.263 |
| H | 15.542 | 1.31   | 38.656 |
| H | 14.452 | 1.588  | 39.67  |
| O | 1.509  | 0.019  | 43.161 |
| H | 1.849  | 0.551  | 42.441 |
| H | 1.358  | -0.842 | 42.771 |
| O | 5.728  | 11.047 | 38.562 |
| H | 5.061  | 10.63  | 38.015 |

|   |        |        |        |
|---|--------|--------|--------|
| H | 6.201  | 10.316 | 38.96  |
| O | 0.262  | 10.128 | 38.553 |
| H | -0.313 | 9.384  | 38.375 |
| H | 1.002  | 9.75   | 39.028 |
| O | 8.067  | 9.092  | 41.085 |
| H | 7.898  | 9.521  | 41.923 |
| H | 8.388  | 8.222  | 41.321 |
| O | 16.125 | 5.291  | 42.988 |
| H | 16.623 | 6.077  | 43.211 |
| H | 15.232 | 5.605  | 42.848 |
| O | 9.346  | 11.67  | 36.407 |
| H | 8.45   | 12.006 | 36.379 |
| H | 9.397  | 11.192 | 37.235 |
| O | 3.235  | 9.439  | 47.126 |
| H | 2.874  | 8.555  | 47.066 |
| H | 3.032  | 9.838  | 46.28  |
| O | 11.134 | 6.602  | 42.833 |
| H | 10.519 | 6.433  | 42.119 |
| H | 10.669 | 7.206  | 43.411 |
| O | 7.846  | 10.953 | 48.737 |
| H | 8.643  | 10.466 | 48.947 |
| H | 7.997  | 11.827 | 49.099 |
| O | 14.837 | 2.44   | 20.247 |
| H | 14.856 | 2.276  | 21.19  |
| H | 14.575 | 3.358  | 20.169 |
| O | 0.455  | 9.503  | 21.491 |
| H | 0.556  | 8.597  | 21.2   |
| H | -0.477 | 9.587  | 21.691 |
| O | 4.383  | 3.461  | 15.447 |
| H | 4.847  | 4.098  | 15.99  |
| H | 3.912  | 3.992  | 14.804 |
| O | -1.931 | 8.156  | 16.151 |
| H | -1.901 | 7.214  | 15.985 |
| H | -2.517 | 8.499  | 15.477 |
| O | 4.512  | 6.414  | 17.912 |
| H | 4.773  | 5.763  | 18.564 |
| H | 3.801  | 5.996  | 17.427 |
| O | 7.493  | 0.308  | 13.708 |
| H | 6.689  | 0.582  | 13.266 |
| H | 8.014  | -0.106 | 13.021 |
| O | 10.583 | 7.613  | 20.372 |
| H | 10.314 | 8.51   | 20.174 |
| H | 11.456 | 7.534  | 19.987 |
| O | 9.075  | 7.222  | 15.807 |
| H | 9.977  | 7.399  | 15.539 |
| H | 9.035  | 7.515  | 16.718 |
| O | 2.371  | 5.19   | 16.772 |

|   |        |        |        |
|---|--------|--------|--------|
| H | 1.593  | 4.806  | 16.367 |
| H | 2.24   | 6.135  | 16.69  |
| O | 10.564 | 4.675  | 26.234 |
| H | 10.718 | 4.214  | 27.059 |
| H | 9.615  | 4.638  | 26.113 |
| O | 2.437  | 11.244 | 17.396 |
| H | 2.063  | 12.076 | 17.686 |
| H | 2.847  | 10.88  | 18.181 |
| O | 6.767  | -1.574 | 26.608 |
| H | 6.992  | -2.46  | 26.323 |
| H | 5.963  | -1.366 | 26.132 |
| O | 10.743 | 4.448  | 23.217 |
| H | 10.935 | 4.262  | 24.136 |
| H | 10.969 | 3.64   | 22.757 |
| O | 6.426  | 10.819 | 25.063 |
| H | 6.973  | 10.114 | 24.717 |
| H | 5.529  | 10.542 | 24.873 |
| O | 10.389 | -2.428 | 10.624 |
| H | 10.297 | -1.533 | 10.949 |
| H | 10.083 | -2.978 | 11.346 |
| O | 3.099  | 5.515  | 21.452 |
| H | 3.875  | 5.566  | 20.894 |
| H | 2.443  | 6.045  | 20.998 |
| O | 16.327 | 5.999  | 30.831 |
| H | 16.215 | 6.394  | 29.967 |
| H | 15.798 | 6.544  | 31.414 |
| O | 14.46  | 1.373  | 22.786 |
| H | 15.076 | 0.712  | 23.099 |
| H | 14.238 | 1.883  | 23.565 |
| O | 9.894  | 1.548  | 30.202 |
| H | 10.181 | 0.637  | 30.262 |
| H | 9.337  | 1.574  | 29.424 |
| O | 4.738  | 12.742 | 14.317 |
| H | 4.695  | 12.706 | 15.272 |
| H | 3.895  | 12.394 | 14.026 |
| O | -3.4   | 8.095  | 13.739 |
| H | -4.323 | 7.968  | 13.959 |
| H | -3.358 | 8.985  | 13.389 |
| O | 2.18   | 11.407 | 14.069 |
| H | 1.463  | 12.035 | 13.982 |
| H | 2.115  | 11.092 | 14.971 |
| O | 14.248 | 5.484  | 20.179 |
| H | 13.866 | 6.156  | 19.614 |
| H | 15.133 | 5.8    | 20.361 |
| O | 10.366 | 5.066  | 32.844 |
| H | 10.77  | 4.203  | 32.755 |
| H | 9.666  | 4.938  | 33.484 |

|   |        |        |        |
|---|--------|--------|--------|
| O | 6.144  | 0.135  | 16.642 |
| H | 5.641  | 0.462  | 15.896 |
| H | 6.61   | 0.903  | 16.972 |
| O | 5.88   | 5.968  | 25.265 |
| H | 6.193  | 5.501  | 24.49  |
| H | 5.686  | 6.851  | 24.951 |
| O | 11.709 | 1.911  | 22.222 |
| H | 12.465 | 1.553  | 22.687 |
| H | 11.748 | 1.508  | 21.354 |
| O | 5.186  | 3.301  | 26.051 |
| H | 5.376  | 4.204  | 25.795 |
| H | 4.977  | 2.858  | 25.229 |
| O | 2.25   | 2.123  | 23.359 |
| H | 1.785  | 2.924  | 23.119 |
| H | 2.043  | 1.993  | 24.284 |
| O | -0.339 | -1.06  | 24.815 |
| H | 0.521  | -0.909 | 25.207 |
| H | -0.834 | -0.265 | 25.009 |
| O | 14.19  | 4.775  | 9.33   |
| H | 13.662 | 4.356  | 10.01  |
| H | 15.077 | 4.787  | 9.69   |
| O | 4.396  | -1.096 | 25.044 |
| H | 3.922  | -1.292 | 25.852 |
| H | 4.31   | -0.149 | 24.938 |
| O | 11.603 | 1.221  | 13.299 |
| H | 12.234 | 1.246  | 14.019 |
| H | 11.998 | 0.632  | 12.656 |
| O | 7.462  | 2.48   | 17.237 |
| H | 7.195  | 3.368  | 16.999 |
| H | 8.211  | 2.296  | 16.669 |
| O | 6.461  | -0.331 | 20.104 |
| H | 7.333  | -0.699 | 19.962 |
| H | 5.894  | -0.819 | 19.507 |
| O | 0.89   | 4.121  | 22.151 |
| H | 1.808  | 4.392  | 22.129 |
| H | 0.636  | 4.061  | 21.23  |
| O | 4.779  | 7.163  | 27.595 |
| H | 5.577  | 6.645  | 27.489 |
| H | 4.225  | 6.635  | 28.17  |
| O | -6.172 | 6.37   | 31.07  |
| H | -6.531 | 7.109  | 30.579 |
| H | -6.706 | 5.622  | 30.801 |
| O | 6.149  | 6.736  | 12.348 |
| H | 5.626  | 7.391  | 12.81  |
| H | 6.992  | 7.165  | 12.198 |
| O | 1.557  | 5.823  | 26.552 |
| H | 1.83   | 6.067  | 25.667 |



|   |        |        |        |
|---|--------|--------|--------|
| H | 1.46   | 6.658  | 27.011 |
| O | 11.499 | 4.566  | 19.022 |
| H | 12.339 | 4.741  | 19.445 |
| H | 10.984 | 4.113  | 19.689 |
| O | 0.931  | 3.678  | 19.213 |
| H | 1.839  | 3.848  | 18.963 |
| H | 0.849  | 2.725  | 19.187 |
| O | 0.829  | 15.912 | 13.929 |
| H | 0.823  | 16.834 | 14.185 |
| H | 0.647  | 15.437 | 14.74  |
| O | 0.294  | 13.486 | 7.34   |
| H | 0.875  | 13.003 | 7.928  |
| H | -0.571 | 13.411 | 7.743  |
| O | 8.571  | 6.084  | 19.331 |
| H | 9.072  | 6.898  | 19.376 |
| H | 9.209  | 5.399  | 19.529 |
| O | 9.815  | 6.983  | 23.102 |
| H | 9.992  | 7.216  | 22.191 |
| H | 10.122 | 6.079  | 23.181 |
| O | -3.62  | 9.995  | 10.667 |
| H | -2.974 | 10.216 | 11.338 |
| H | -4.462 | 10.222 | 11.062 |
| O | 8.703  | 15.807 | 35.483 |
| H | 8.738  | 15.833 | 36.439 |
| H | 9.619  | 15.842 | 35.209 |
| O | 0.015  | 10.635 | 27.033 |
| H | 0.045  | 10.609 | 26.077 |
| H | -0.488 | 11.423 | 27.236 |
| O | 2.782  | 8.321  | 5.959  |
| H | 2.746  | 7.547  | 6.521  |
| H | 2.151  | 8.927  | 6.347  |
| O | 4.313  | 5.714  | 10.446 |
| H | 3.619  | 6.373  | 10.472 |
| H | 5.121  | 6.212  | 10.57  |
| O | 1.102  | -0.611 | 29.093 |
| H | 0.832  | -0.775 | 29.997 |
| H | 0.297  | -0.346 | 28.647 |
| O | 6.991  | 5.951  | 9.121  |
| H | 6.468  | 5.536  | 8.435  |
| H | 6.801  | 6.886  | 9.035  |
| O | 2.798  | 8.954  | 29.82  |
| H | 2.831  | 8.059  | 30.157 |
| H | 2.054  | 8.956  | 29.217 |
| O | -2.876 | 1.913  | 9.665  |
| H | -2.179 | 2.376  | 9.201  |
| H | -3.532 | 2.586  | 9.847  |
| O | 2.553  | 2.255  | 12.24  |

|   |        |        |        |
|---|--------|--------|--------|
| H | 2.572  | 2.337  | 11.286 |
| H | 2.606  | 3.156  | 12.559 |
| O | 3.347  | 5.945  | 29.389 |
| H | 3.468  | 6.079  | 30.329 |
| H | 3.214  | 5.002  | 29.296 |
| O | 5.774  | -6.066 | 30.938 |
| H | 5.175  | -5.971 | 31.679 |
| H | 6.24   | -6.885 | 31.11  |
| O | 8.885  | -5.376 | 22.503 |
| H | 8.329  | -5.667 | 23.226 |
| H | 8.916  | -4.424 | 22.594 |
| O | 3.401  | 8.347  | 25.578 |
| H | 2.864  | 9.027  | 25.986 |
| H | 4.102  | 8.183  | 26.209 |
| O | 7.886  | 3.571  | 26.712 |
| H | 8.393  | 2.99   | 26.145 |
| H | 6.973  | 3.369  | 26.508 |
| O | 2.915  | 3.55   | 27.821 |
| H | 3.664  | 3.428  | 27.237 |
| H | 2.273  | 4.022  | 27.291 |
| O | -7.292 | 2.333  | 18.51  |
| H | -6.761 | 2.683  | 19.225 |
| H | -6.721 | 1.697  | 18.077 |
| O | 6.41   | 9.105  | 30.02  |
| H | 5.488  | 8.868  | 29.919 |
| H | 6.832  | 8.301  | 30.322 |
| O | 8.34   | -1.469 | 16.689 |
| H | 7.73   | -0.735 | 16.765 |
| H | 7.841  | -2.227 | 16.993 |
| O | 8.644  | 5.069  | 13.901 |
| H | 7.783  | 4.654  | 13.841 |
| H | 8.569  | 5.669  | 14.643 |
| O | 6.421  | 5.457  | 16.14  |
| H | 5.684  | 5.926  | 16.531 |
| H | 7.151  | 6.074  | 16.189 |
| O | 7.888  | 6.644  | 30.876 |
| H | 8.653  | 6.246  | 31.291 |
| H | 7.147  | 6.135  | 31.204 |
| O | 16.888 | 4.681  | 9.574  |
| H | 16.894 | 3.871  | 9.065  |
| H | 17.221 | 5.346  | 8.972  |
| O | 18.796 | 0.669  | 16.192 |
| H | 18.13  | 0.492  | 16.857 |
| H | 18.297 | 0.901  | 15.409 |
| O | 11.544 | 1.009  | 25.158 |
| H | 12.127 | 1.582  | 24.66  |
| H | 12.006 | 0.855  | 25.982 |

|   |        |        |        |
|---|--------|--------|--------|
| O | 9.494  | -5.392 | 25.679 |
| H | 8.716  | -5.132 | 26.172 |
| H | 9.887  | -4.565 | 25.399 |
| O | 2.971  | 9.746  | 19.96  |
| H | 2.241  | 9.168  | 20.183 |
| H | 3.311  | 10.039 | 20.805 |
| O | 1.234  | 6.964  | 19.725 |
| H | 0.797  | 6.139  | 19.513 |
| H | 0.804  | 7.613  | 19.168 |
| O | 13.051 | 11.556 | 23.109 |
| H | 12.742 | 12.12  | 23.817 |
| H | 12.691 | 10.694 | 23.315 |
| O | 3.888  | 7.871  | 14.161 |
| H | 4.475  | 8.571  | 14.447 |
| H | 3.41   | 7.621  | 14.951 |
| O | 3.556  | 14.082 | 19.925 |
| H | 2.776  | 13.83  | 20.418 |
| H | 3.234  | 14.697 | 19.266 |
| O | 0.337  | 12.027 | 20.525 |
| H | 0.553  | 11.141 | 20.817 |
| H | 0.904  | 12.596 | 21.045 |
| O | 10.089 | 4.845  | 11.157 |
| H | 9.309  | 4.317  | 10.987 |
| H | 10.072 | 5      | 12.101 |
| O | 5.274  | 8.814  | 18.567 |
| H | 4.922  | 8.01   | 18.185 |
| H | 4.507  | 9.272  | 18.911 |
| O | 7.746  | 0.874  | 9.847  |
| H | 6.962  | 0.712  | 9.322  |
| H | 7.556  | 1.688  | 10.315 |
| O | 5.41   | 7.356  | 4.928  |
| H | 6.271  | 7.182  | 5.308  |
| H | 4.797  | 7.21   | 5.649  |
| O | 10.263 | 8.385  | 0.169  |
| H | 10.359 | 8.642  | -0.748 |
| H | 10.227 | 7.429  | 0.148  |
| O | 5.312  | 11.244 | 3.801  |
| H | 5.864  | 10.578 | 3.391  |
| H | 4.871  | 11.673 | 3.067  |
| O | 8.071  | 6.308  | 2.771  |
| H | 7.532  | 5.597  | 2.424  |
| H | 8.787  | 6.394  | 2.141  |
| O | 3.345  | 9.848  | 8.818  |
| H | 4.13   | 9.651  | 8.308  |
| H | 2.713  | 10.165 | 8.172  |
| O | 4.219  | 6.697  | 1.897  |
| H | 3.73   | 6.908  | 2.693  |

|   |        |        |        |
|---|--------|--------|--------|
| H | 4.873  | 6.058  | 2.181  |
| O | 3.613  | -0.706 | 6.398  |
| H | 2.728  | -0.574 | 6.736  |
| H | 3.768  | 0.049  | 5.83   |
| O | 4.874  | 9.962  | 6.472  |
| H | 5.099  | 10.556 | 5.755  |
| H | 4.331  | 9.289  | 6.063  |
| O | 7.834  | 11.149 | 9.379  |
| H | 7.724  | 11.745 | 10.12  |
| H | 7.587  | 11.669 | 8.614  |
| O | 15.536 | 9.667  | 18.803 |
| H | 15.796 | 10.159 | 18.024 |
| H | 15.608 | 8.749  | 18.542 |
| O | 13.55  | 10.064 | 6.696  |
| H | 13.872 | 9.332  | 7.221  |
| H | 12.975 | 10.549 | 7.288  |
| O | 2.303  | 7.667  | 10.354 |
| H | 2.318  | 8.032  | 11.238 |
| H | 2.594  | 8.386  | 9.793  |
| O | 5.484  | -2.248 | 7.245  |
| H | 5.971  | -1.78  | 7.923  |
| H | 4.756  | -1.666 | 7.027  |
| O | 2.853  | 5.818  | 7.314  |
| H | 2.906  | 5.839  | 8.269  |
| H | 3.626  | 5.322  | 7.042  |
| O | 1.107  | 3.187  | 4.494  |
| H | 0.983  | 2.38   | 4.993  |
| H | 0.236  | 3.395  | 4.155  |
| O | 10.856 | 3.285  | 1.598  |
| H | 10.882 | 3.006  | 2.513  |
| H | 11.756 | 3.543  | 1.4    |
| O | 3.338  | 3.082  | 9.668  |
| H | 2.542  | 3.614  | 9.672  |
| H | 4.013  | 3.658  | 10.026 |
| O | 4.077  | 13.375 | 5.653  |
| H | 4.218  | 14.282 | 5.382  |
| H | 4.366  | 12.854 | 4.904  |
| O | 9.631  | 0.052  | 11.642 |
| H | 8.949  | 0.415  | 11.077 |
| H | 9.964  | 0.805  | 12.13  |
| O | 0.89   | 10.865 | 0.716  |
| H | 0.775  | 10.665 | -0.213 |
| H | 1.73   | 10.468 | 0.945  |
| O | 1.61   | 10.711 | 6.728  |
| H | 1.502  | 11.657 | 6.83   |
| H | 1.555  | 10.564 | 5.784  |
| O | -1.649 | 3.783  | 3.168  |

|   |        |        |        |
|---|--------|--------|--------|
| H | -2.294 | 3.857  | 2.464  |
| H | -1.123 | 4.579  | 3.096  |
| O | 4.375  | 16.088 | 4.628  |
| H | 3.614  | 16.659 | 4.73   |
| H | 5.04   | 16.644 | 4.223  |
| O | -2.901 | 6.981  | 2.939  |
| H | -2.987 | 7.613  | 2.225  |
| H | -3.304 | 6.181  | 2.601  |
| O | 1.435  | 5.573  | -1.823 |
| H | 0.936  | 6.074  | -1.178 |
| H | 0.771  | 5.088  | -2.314 |
| O | 7.127  | 14.015 | 1.716  |
| H | 7.425  | 13.507 | 2.47   |
| H | 6.823  | 13.359 | 1.089  |
| O | 0.986  | 4.91   | 9.848  |
| H | 0.581  | 4.462  | 10.591 |
| H | 1.06   | 5.822  | 10.129 |
| O | -1.886 | 10.001 | 6.038  |
| H | -1.126 | 10.302 | 6.536  |
| H | -2.573 | 9.887  | 6.694  |
| O | 7.716  | 6.537  | 5.501  |
| H | 8.438  | 6.618  | 6.123  |
| H | 8.142  | 6.387  | 4.657  |
| O | 11.233 | 4.501  | 6.879  |
| H | 10.73  | 3.69   | 6.955  |
| H | 10.897 | 5.058  | 7.581  |
| O | 12.889 | 3.41   | 11.05  |
| H | 12.828 | 2.47   | 10.88  |
| H | 12.035 | 3.643  | 11.414 |
| O | 9.898  | -2.015 | 14.548 |
| H | 10.687 | -2.39  | 14.938 |
| H | 9.331  | -1.82  | 15.295 |
| O | -0.734 | 3.008  | 8.396  |
| H | -0.963 | 3.379  | 7.544  |
| H | -0.155 | 3.658  | 8.792  |
| O | 6.84   | 8.805  | 8.042  |
| H | 6.211  | 9.23   | 7.46   |
| H | 7.215  | 9.522  | 8.554  |
| O | 4.654  | 1.777  | 4.738  |
| H | 5.11   | 2.135  | 3.976  |
| H | 3.937  | 2.39   | 4.898  |
| O | 1.512  | 10.159 | 3.512  |
| H | 0.692  | 9.716  | 3.73   |
| H | 1.248  | 10.887 | 2.948  |
| O | 12.4   | 6.493  | 14.532 |
| H | 12.572 | 6.821  | 13.65  |
| H | 12.087 | 5.598  | 14.399 |

|   |        |        |        |
|---|--------|--------|--------|
| O | 9.657  | -0.026 | 3.317  |
| H | 9.91   | -0.609 | 4.033  |
| H | 9.916  | 0.846  | 3.614  |
| O | 7.479  | 9.148  | 12.947 |
| H | 7.299  | 9.059  | 13.883 |
| H | 7.394  | 10.086 | 12.775 |
| O | 13.375 | -1.107 | 15.154 |
| H | 14.172 | -0.874 | 14.678 |
| H | 13.048 | -1.887 | 14.707 |
| O | 15.218 | 2.269  | 2.41   |
| H | 15.864 | 2.9    | 2.729  |
| H | 14.458 | 2.802  | 2.175  |
| O | 0.501  | 5.318  | 2.919  |
| H | 0.834  | 6.116  | 3.33   |
| H | 0.969  | 4.609  | 3.36   |
| O | 8.229  | 12.98  | 4.402  |
| H | 7.977  | 12.061 | 4.312  |
| H | 9.184  | 12.974 | 4.346  |
| O | 6.79   | 12.619 | 7.299  |
| H | 6.682  | 13.37  | 6.715  |
| H | 5.99   | 12.107 | 7.182  |
| O | -0.204 | 14.339 | -0.906 |
| H | 0.114  | 15.218 | -0.703 |
| H | -0.48  | 13.983 | -0.062 |
| O | -1.867 | 7.915  | 9.291  |
| H | -2.313 | 8.594  | 8.786  |
| H | -1.19  | 8.384  | 9.779  |
| O | 3.478  | 13.028 | 8.178  |
| H | 4.356  | 12.869 | 8.525  |
| H | 3.611  | 13.157 | 7.239  |

**Table S23.** Time for TERACHEM SCF and CIS computation in seconds, in parenthesis relative speedups of SCF and CIS computation for TERACHEM compared to GAMESS, SCF ground state energies and difference from GAMESS value, first excited state energies ( $\Delta E_{S_0/S_1}$ ) and difference from GAMESS value. Calculations performed on a dual Intel Xeon X5570 (eight CPU cores) with 72 GB RAM. GPU calculations use eight Tesla C1060 GPU cards. Wave function convergence threshold is 1.0e-5. GAMESS calculations are performed with default values. The GAMESS integral thresholding is given by ITOL=20, in which products of primitives whose exponential factor is less than 10e-20 are skipped. TERACHEM integral thresholding is described in the text.

| molecule (atoms; basis functions)          | TERACHEM timings (speedup vs GAMESS ) |                | SCF             |           | CIS                       |           |
|--------------------------------------------|---------------------------------------|----------------|-----------------|-----------|---------------------------|-----------|
|                                            | SCF                                   | CIS            | Energy (au)     | diff (au) | $\Delta E_{S_0/S_1}$ (eV) | diff (eV) |
| <b>Mixed precision + threshold 10e-11</b>  |                                       |                |                 |           |                           |           |
| B3PPQ oligoquinoline (112; 700)            | 15.5 (10.8)                           | 41.9 (8.9)     | -2633.01400524  | 6.7e-6    | 4.70563979                | 8.4e-6    |
| PYP chromophore + 101 waters (332; 1501)   | 65.5 (47.7)                           | 133.2 (22.8)   | -8796.99181455  | -9.4e-6   | 3.64096807                | -2.7e-5   |
| PYP chromophore + 261 waters (812; 3581)   | 406.7 (218.4)                         | 493.2 (117.2)  | -20957.14907677 | -3.0e-5   | 3.64540788                | -3.1e-5   |
| PYP chromophore + 487 waters (1490; 6519)  | 1640.7 (547.1)                        | 1221.2 (460.7) | -38133.20662487 | -6.3e-5   | 3.65499663                | -3.3e-5   |
| <b>Mixed precision + threshold 10e-13</b>  |                                       |                |                 |           |                           |           |
| B3PPQ oligoquinoline (112; 700)            | 17.6 (9.6)                            | 53.4 (7.0)     | -2633.01400201  | 3.4e-6    | 4.70563952                | 8.7e-6    |
| PYP chromophore + 101 waters (332; 1501)   | 92.3 (33.9)                           | 205.0 (14.8)   | -8796.99181852  | -5.4e-6   | 3.64096807                | -2.7e-5   |
| PYP chromophore + 261 waters (812; 3581)   | 561.7 (158.2)                         | 827.3 (69.9)   | -20957.14907677 | -9.9e-6   | 3.64540870                | -3.1e-5   |
| PYP chromophore + 487 waters (1490; 6519)  | 2091.3 (429.2)                        | 2026.6 (277.6) | -38133.20666087 | -2.7e-5   | 3.65499745                | -3.4e-5   |
| <b>Double precision + threshold 10e-11</b> |                                       |                |                 |           |                           |           |
| B3PPQ oligoquinoline (112; 700)            | 33.8 (5.0)                            | 225.3 (1.6)    | -2633.01400146  | 2.9e-6    | 4.70564134                | 6.8e-6    |
| PYP chromophore + 101 waters (332; 1501)   | 127.5 (24.5)                          | 653.2 (4.6)    | -8796.99182000  | -3.9e-6   | 3.64097242                | -3.1e-5   |
| PYP chromophore + 261 waters (812; 3581)   | 653.0 (136.1)                         | 2355.5 (24.5)  | -20957.14907677 | -2.2e-5   | 3.64541278                | -3.5e-5   |
| PYP chromophore + 487 waters (1490; 6519)  | 2221.0 (404.2)                        | 5300.2 (106.1) | -38133.20665001 | -3.8e-5   | 3.65500207                | -3.8e-5   |
| <b>Double precision + threshold 10e-13</b> |                                       |                |                 |           |                           |           |
| B3PPQ oligoquinoline (112; 700)            | 48.0 (3.5)                            | 290.0 (1.3)    | -2633.01399860  | 3.2e-8    | 4.70564134                | 6.8e-6    |
| PYP chromophore + 101 waters (332; 1501)   | 211.9 (14.8)                          | 1021.9 (3.0)   | -8796.99182363  | -3.2e-7   | 3.64097270                | -3.2e-5   |
| PYP chromophore + 261 waters (812; 3581)   | 1039.0 (85.5)                         | 3941.2 (14.7)  | -20957.14907677 | -1.1e-6   | 3.64541332                | -3.6e-5   |
| PYP chromophore + 487 waters (1490; 6519)  | 3316.8 (270.6)                        | 9123.9 (61.7)  | -38133.20668564 | -2.5e-6   | 3.65500289                | -3.9e-5   |
| <b>Double precision + threshold 10e-15</b> |                                       |                |                 |           |                           |           |
| B3PPQ oligoquinoline (112; 700)            | 65.0 (2.6)                            | 360.4 (1.0)    | -2633.01399859  | 3.0e-8    | 4.70564134                | 6.8e-6    |
| PYP chromophore + 101 waters (332; 1501)   | 334.9 (9.3)                           | 1506.8 (2.0)   | -8796.99182373  | -2.1e-7   | 3.64097270                | -3.2e-5   |
| PYP chromophore + 261 waters (812; 3581)   | 1662.9 (53.4)                         | 6199.6 (9.3)   | -20957.14907677 | -7.6e-7   | 3.64541332                | -3.6e-5   |
| PYP chromophore + 487 waters (1490; 6519)  | 5060.7 (177.4)                        | 14802.9 (38.0) | -38133.20668654 | -1.6e-6   | 3.65500289                | -3.9e-5   |
